# Supplementary material for: Immunological Response to Single Pathogen Challenge with Agents of the Bovine Respiratory Disease Complex: An RNA-Sequence Analysis of the Bronchial Lymph Node Transcriptome
Source: PLoS One. 2015 Jun 29;10(6):e0131459. doi: 10.1371/journal.pone.0131459 (PMC4484807; doi:10.1371/journal.pone.0131459)
Supplement: S4 Table — Tabs are identified according to the type of DAVID analysis performed. (XLSX) [file pone.0131459.s004.xlsx]

## Sheet: DE_genes
gene	locus	sample_1	sample_2	status	value_1	value_2	log2(fold_change)	q_value	significant
ALB	6:90232761-90251122	BVDV	CTRL	OK	12.5772	0.0683586	-7.52347	0.000603881	yes
FGB	17:2875548-2884552	BVDV	CTRL	OK	4.02031	0.0422781	-6.57126	0.000603881	yes
FGG	17:2823043-2830515	BVDV	CTRL	OK	3.66302	0.0464413	-6.30148	0.014094	yes
LOC100847261	22:52148149-52149580	BVDV	CTRL	OK	15.8737	0.20674	-6.26268	0.0125717	yes
PRG3	15:81921148-81926082	BVDV	CTRL	OK	8.21822	0.119618	-6.10232	0.0160094	yes
SERPINA3-1	21:59824344-59830426	BVDV	CTRL	OK	1.63868	0.0524963	-4.96417	0.0217397	yes
CATHL2	22:52189556-52191061	BVDV	CTRL	OK	4.07147	0.140722	-4.85462	0.0221551	yes
AZU1	7:44968575-44971478	BVDV	CTRL	OK	2.56784	0.0957971	-4.74443	0.0302321	yes
LOC100336999	12:71321404-71535528	BVDV	CTRL	OK	12.0655	0.514158	-4.55254	0.000603881	yes
SFRP4	4:50009871-50020466	BVDV	CTRL	OK	12.64	0.633318	-4.31892	0.000603881	yes
LOC100337129	12:73516166-73569768	BVDV	CTRL	OK	16.9833	0.889442	-4.25507	0.000603881	yes
CES1	18:24066408-24098656	BVDV	CTRL	OK	0.478756	0.0304971	-3.97255	0.0458405	yes
CYP1A2	21:34314497-34321201	BVDV	CTRL	OK	0.722688	0.0561778	-3.6853	0.00733648	yes
LBP	13:67875397-67910095	BVDV	CTRL	OK	0.705494	0.0566446	-3.63862	0.0118002	yes
TF	1:136683310-136722309	BVDV	CTRL	OK	7.94642	0.91977	-3.11096	0.000603881	yes
CD177	18:51877253-51888123	BVDV	CTRL	OK	0.545166	0.0663233	-3.03911	0.0176268	yes
HSD17B14	18:55878588-55899000	BVDV	CTRL	OK	2.32485	0.284927	-3.02847	0.000603881	yes
LOC100295022	17:72901504-72908949	BVDV	CTRL	OK	4.74952	0.58792	-3.01409	0.000603881	yes
LOC100337097	18:61679806-61682611	BVDV	CTRL	OK	1.97124	0.244287	-3.01246	0.000603881	yes
PGLYRP1	18:53946096-53948158	BVDV	CTRL	OK	5.3369	0.721935	-2.88606	0.000603881	yes
PRTN3	7:44981097-44984484	BVDV	CTRL	OK	1.07261	0.149967	-2.83841	0.0174091	yes
LOC509034	10:87896636-87907378	BVDV	CTRL	OK	4.50189	0.634076	-2.8278	0.000603881	yes
MRCL	18:1870811-1875884	BVDV	CTRL	OK	0.627484	0.0887425	-2.82188	0.0174091	yes
CTHRC1	14:63311959-63328221	BVDV	CTRL	OK	1.11842	0.158461	-2.81926	0.00110321	yes
PI16	23:10836789-10848749	BVDV	CTRL	OK	4.47011	0.675916	-2.72539	0.000603881	yes
LRG1	7:20812033-20814992	BVDV	CTRL	OK	1.35289	0.204656	-2.72478	0.000603881	yes
MGC127695	6:66982101-67118236	BVDV	CTRL	OK	6.00056	0.912789	-2.71674	0.000603881	yes
MPO	19:9473000-9484176	BVDV	CTRL	OK	1.39377	0.219431	-2.66716	0.000603881	yes
SCG2	2:112549868-112555375	BVDV	CTRL	OK	1.25926	0.198539	-2.66507	0.000603881	yes
COL8A1	1:43541935-43717620	BVDV	CTRL	OK	1.02173	0.167194	-2.61142	0.000603881	yes
APOA1	15:27932197-27934085	BVDV	CTRL	OK	12.4011	2.05421	-2.59382	0.000603881	yes
SFRP2	17:3829563-3838138	BVDV	CTRL	OK	19.543	3.27391	-2.57756	0.000603881	yes
GLYAT	15:83455507-83469277	BVDV	CTRL	OK	1.07321	0.188548	-2.50893	0.0123084	yes
TTR	24:25854674-25863535	BVDV	CTRL	OK	9.51514	1.69406	-2.48974	0.000603881	yes
MMP3	15:6028010-6034595	BVDV	CTRL	OK	0.892725	0.162134	-2.46102	0.00278749	yes
FBLN1	5:116616199-116695696	BVDV	CTRL	OK	14.8403	2.7077	-2.45438	0.000603881	yes
GSTA2	23:24823644-24837368	BVDV	CTRL	OK	0.633994	0.116494	-2.44421	0.0483178	yes
MEGF11	10:12720419-13123709	BVDV	CTRL	OK	0.908521	0.168401	-2.43162	0.000603881	yes
LOC511498	26:20885730-20913649	BVDV	CTRL	OK	0.406014	0.0754806	-2.42735	0.00844743	yes
ITGBL1	12:81873526-82108677	BVDV	CTRL	OK	1.28564	0.239881	-2.42209	0.00110321	yes
TPSB1	25:994574-996278	BVDV	CTRL	OK	8.59945	1.65307	-2.37909	0.000603881	yes
KLK7	18:57419928-57425155	BVDV	CTRL	OK	0.544925	0.106374	-2.35691	0.00960826	yes
DUSP26	27:28963363-28969954	BVDV	CTRL	OK	1.9724	0.387895	-2.34621	0.000603881	yes
FAM84A	11:83655858-83659066	BVDV	CTRL	OK	1.22083	0.24366	-2.32491	0.000603881	yes
HP	18:39173136-39179293	BVDV	CTRL	OK	5.04168	1.02062	-2.30446	0.000603881	yes
SERPINF1	19:23418895-23430668	BVDV	CTRL	OK	8.72152	1.76771	-2.3027	0.000603881	yes
ITIH2	13:16217715-16250004	BVDV	CTRL	OK	0.415805	0.0875624	-2.24752	0.00278749	yes
LOC100300028	7:15689614-15704694	BVDV	CTRL	OK	68.6792	14.884	-2.20611	0.000603881	yes
C1QTNF3	20:39760049-39792325	BVDV	CTRL	OK	0.340922	0.0743212	-2.19759	0.00902249	yes
DPT	16:37106631-37143040	BVDV	CTRL	OK	10.7678	2.34848	-2.19692	0.000603881	yes
LOC100336084	23:25481701-25490244	BVDV	CTRL	OK	145.399	31.9648	-2.18545	0.000603881	yes
LOC100300896	11:44706972-44717428	BVDV	CTRL	OK	10.0523	2.21727	-2.18067	0.000603881	yes
LOC786948	25:987386-989242	BVDV	CTRL	OK	13.4817	3.00311	-2.16647	0.000603881	yes
F2	15:77530564-77544935	BVDV	CTRL	OK	3.53562	0.80033	-2.1433	0.000603881	yes
KLK12	18:57461616-57465567	BVDV	CTRL	OK	1.70974	0.394277	-2.1165	0.0107026	yes
DEFB10	27:6194469-6196146	BVDV	CTRL	OK	164.017	38.1396	-2.10448	0.00110321	yes
ALDOB	8:92773690-92789092	BVDV	CTRL	OK	0.444	0.104754	-2.08356	0.0187455	yes
LOC521568	12:71903904-72005987	BVDV	CTRL	OK	3.37191	0.802961	-2.07016	0.000603881	yes
SMTNL2	19:25702552-25724157	BVDV	CTRL	OK	0.566662	0.143058	-1.98589	0.00417128	yes
LOC404107	27:5327038-5328962	BVDV	CTRL	OK	8.18698	2.1056	-1.9591	0.00110321	yes
LOC100847582	19:37088245-37105761	BVDV	CTRL	OK	49.1283	12.6364	-1.95897	0.000603881	yes
CHP2	25:21657895-21661311	BVDV	CTRL	OK	0.553768	0.14321	-1.95115	0.0178144	yes
LOC508455	18:53270705-53284531	BVDV	CTRL	OK	0.44361	0.115346	-1.94333	0.0227642	yes
MFAP5	5:101647628-101659388	BVDV	CTRL	OK	9.43444	2.48584	-1.9242	0.000603881	yes
PODN	3:93728449-93751305	BVDV	CTRL	OK	6.35705	1.68941	-1.91183	0.000603881	yes
COL1A1	19:37088245-37105761	BVDV	CTRL	OK	43.0759	11.5071	-1.90436	0.000603881	yes
LOC520070	29:45015999-45018614	BVDV	CTRL	OK	3.61413	0.972078	-1.8945	0.000603881	yes
SOX17	14:23884841-23886642	BVDV	CTRL	OK	1.46323	0.398189	-1.87763	0.00673997	yes
LOC100300806	7:15707337-15720295	BVDV	CTRL	OK	347.514	94.8917	-1.87271	0.000603881	yes
PTI	13:74930435-75008385	BVDV	CTRL	OK	38.8787	10.6496	-1.86818	0.0162451	yes
COL3A1	2:7317286-7356904	BVDV	CTRL	OK	95.4619	26.335	-1.85794	0.000603881	yes
S100A8	3:17146917-17147899	BVDV	CTRL	OK	25.112	7.0142	-1.84003	0.000603881	yes
GZMB	21:35264493-35267998	BVDV	CTRL	OK	4.88004	1.37586	-1.82656	0.000603881	yes
PVALB	5:75550902-75568048	BVDV	CTRL	OK	5.87711	1.6939	-1.79476	0.000603881	yes
NOV	14:47005556-47013935	BVDV	CTRL	OK	5.79735	1.67876	-1.788	0.000603881	yes
FBLN2	22:58989965-59059137	BVDV	CTRL	OK	8.14615	2.37686	-1.77706	0.000603881	yes
STX1A	25:34053828-34071558	BVDV	CTRL	OK	2.72052	0.806311	-1.75447	0.000603881	yes
LTB4R	10:20687226-20689253	BVDV	CTRL	OK	1.2492	0.370368	-1.75397	0.00580788	yes
DEFB7	27:5184933-5186829	BVDV	CTRL	OK	6.80235	2.02038	-1.7514	0.00350101	yes
LOC781101	15:77527605-77528674	BVDV	CTRL	OK	1.5292	0.455538	-1.74713	0.0104295	yes
LOC100138645	19:43562654-43574472	BVDV	CTRL	OK	1.21918	0.366129	-1.73549	0.00110321	yes
COL1A2	4:11624469-11661163	BVDV	CTRL	OK	61.9407	18.7184	-1.72643	0.000603881	yes
MUSTN1	22:48611897-48613044	BVDV	CTRL	OK	25.8705	7.8481	-1.72089	0.000603881	yes
CLDN3	25:34018455-34019670	BVDV	CTRL	OK	5.45863	1.663	-1.71475	0.000603881	yes
LOC512863	18:57965913-57969622	BVDV	CTRL	OK	33.3256	10.1677	-1.71264	0.000603881	yes
MMP2	18:23828618-23855027	BVDV	CTRL	OK	13.1379	4.0314	-1.70438	0.000603881	yes
LOC100139881	21:35122238-35124997	BVDV	CTRL	OK	5.96654	1.86541	-1.6774	0.000603881	yes
SEMA3G	22:48999624-49008503	BVDV	CTRL	OK	2.14075	0.669923	-1.67605	0.000603881	yes
CPA3	1:120236685-120268817	BVDV	CTRL	OK	2.73731	0.857857	-1.67395	0.000603881	yes
CLEC11A	18:57259805-57262109	BVDV	CTRL	OK	3.01155	0.944917	-1.67225	0.00110321	yes
LOC782922	13:44064652-44085030	BVDV	CTRL	OK	14.9512	4.69972	-1.66962	0.000603881	yes
SYCP2L	23:45119090-45181407	BVDV	CTRL	OK	0.862366	0.27154	-1.66714	0.000603881	yes
GNLY	11:49095461-49096945	BVDV	CTRL	OK	41.5354	13.0916	-1.6657	0.000603881	yes
TGM3	13:53261631-53304213	BVDV	CTRL	OK	1.16923	0.370995	-1.65609	0.000603881	yes
BGN	X:39639905-39653691	BVDV	CTRL	OK	21.6036	6.85946	-1.6551	0.000603881	yes
GRRP1	2:127530910-127533980	BVDV	CTRL	OK	7.42075	2.37119	-1.64595	0.000603881	yes
ITGA7	5:57873911-57901249	BVDV	CTRL	OK	3.21939	1.03044	-1.64353	0.000603881	yes
ACTG2	11:10717557-10740084	BVDV	CTRL	OK	15.7605	5.05512	-1.6405	0.000603881	yes
MGC157237	6:26043473-26064216	BVDV	CTRL	OK	1.09277	0.351684	-1.63563	0.00758658	yes
CNN1	7:17106393-17114224	BVDV	CTRL	OK	13.8501	4.47782	-1.62903	0.000603881	yes
CCR10	19:43377278-43379246	BVDV	CTRL	OK	6.52363	2.11639	-1.62407	0.000603881	yes
C12H13orf33	12:30021741-30039901	BVDV	CTRL	OK	1.26535	0.411369	-1.62103	0.00278749	yes
CLDN5	17:74749249-74750524	BVDV	CTRL	OK	118.465	38.5217	-1.62072	0.000603881	yes
BRB	10:26288222-26289852	BVDV	CTRL	OK	17.2436	5.62637	-1.61579	0.000603881	yes
LOXL2	8:71278581-71390893	BVDV	CTRL	OK	3.17984	1.03914	-1.61356	0.000603881	yes
HTRA3	6:119388903-119419275	BVDV	CTRL	OK	2.7533	0.901048	-1.61148	0.000603881	yes
LOC540321	21:35112324-35115015	BVDV	CTRL	OK	1.34507	0.441183	-1.60824	0.0227642	yes
RN28S1	3:53470477-53471334	BVDV	CTRL	OK	3645.66	1198.93	-1.60443	0.00758658	yes
GULO	8:75984695-76010700	BVDV	CTRL	OK	1.30712	0.430992	-1.60065	0.000603881	yes
SOX18	13:54295528-54297260	BVDV	CTRL	OK	21.1262	6.9881	-1.59606	0.000603881	yes
EPOR	7:16998237-17003707	BVDV	CTRL	OK	2.21473	0.734287	-1.59272	0.000603881	yes
EGFL7	11:104128897-104133541	BVDV	CTRL	OK	72.4299	24.1141	-1.58671	0.000603881	yes
KRT24	19:41557542-41561919	BVDV	CTRL	OK	0.414664	0.138185	-1.58535	0.032137	yes
SPON2	6:109224625-109228237	BVDV	CTRL	OK	10.6711	3.55791	-1.58461	0.000603881	yes
MALL	11:1747908-1780103	BVDV	CTRL	OK	1.71765	0.572796	-1.58435	0.000603881	yes
LUM	5:21037442-21044658	BVDV	CTRL	OK	19.4774	6.50986	-1.58111	0.000603881	yes
KLHDC8A	16:2930873-2936327	BVDV	CTRL	OK	3.99385	1.33999	-1.57555	0.000603881	yes
FCER1A	3:10539986-10546195	BVDV	CTRL	OK	6.56346	2.20217	-1.57553	0.000603881	yes
LOC404103	13:74930435-75008385	BVDV	CTRL	OK	43.4792	14.6119	-1.57318	0.000603881	yes
S100A9	3:17176216-17178919	BVDV	CTRL	OK	18.6365	6.27273	-1.57097	0.000603881	yes
PTGIS	13:78319045-78368752	BVDV	CTRL	OK	2.8544	0.965821	-1.56336	0.000603881	yes
GLT8D2	5:67994624-68036627	BVDV	CTRL	OK	0.79171	0.268638	-1.55931	0.0169612	yes
ACCN1	19:16353061-17563070	BVDV	CTRL	OK	0.406862	0.138548	-1.55415	0.0213189	yes
MXRA8	16:52424101-52428457	BVDV	CTRL	OK	21.3557	7.27947	-1.55271	0.000603881	yes
VSIG4	X:99894565-99933656	BVDV	CTRL	OK	20.3748	6.95624	-1.55041	0.000603881	yes
AVPR2	X:40036422-40038823	BVDV	CTRL	OK	2.27746	0.779539	-1.54673	0.000603881	yes
MMP9	13:75466512-75473824	BVDV	CTRL	OK	5.48721	1.87857	-1.54644	0.000603881	yes
VTN	19:20413682-20416614	BVDV	CTRL	OK	3.87297	1.33096	-1.54098	0.000603881	yes
DDO	9:40276017-40293612	BVDV	CTRL	OK	0.827687	0.2855	-1.53559	0.00814978	yes
LOC615055	29:50738512-50741491	BVDV	CTRL	OK	7.17571	2.48131	-1.53202	0.00278749	yes
LOC100848726	29:50712831-50713218	BVDV	CTRL	OK	2470.85	856.648	-1.52824	0.000603881	yes
CCDC48	22:59648571-59675908	BVDV	CTRL	OK	0.632321	0.219303	-1.52773	0.00988715	yes
GATA2	22:60016984-60024586	BVDV	CTRL	OK	4.18904	1.45606	-1.52455	0.000603881	yes
LOC616323	11:49135529-49140111	BVDV	CTRL	OK	6.8747	2.40179	-1.51719	0.000603881	yes
FAM69B	11:104176543-104181092	BVDV	CTRL	OK	4.10056	1.44097	-1.50878	0.000603881	yes
SEMA6B	7:20787801-20807768	BVDV	CTRL	OK	2.41133	0.847804	-1.50803	0.000603881	yes
PLAC9	28:35366023-35378318	BVDV	CTRL	OK	3.21836	1.1379	-1.49996	0.000603881	yes
MOK	21:68706702-68736526	BVDV	CTRL	OK	0.957387	0.342362	-1.48358	0.0101625	yes
VCAN	7:85666057-85782896	BVDV	CTRL	OK	0.523296	0.187271	-1.4825	0.000603881	yes
LOC100300483	11:49060225-49062854	BVDV	CTRL	OK	18.6346	6.67336	-1.4815	0.000603881	yes
GPC3	X:17305527-17770802	BVDV	CTRL	OK	1.73538	0.624427	-1.47465	0.000603881	yes
RASL12	10:11930743-11959908	BVDV	CTRL	OK	2.32181	0.837489	-1.47111	0.000603881	yes
CYP3A4	25:37125928-37175162	BVDV	CTRL	OK	1.29943	0.469712	-1.46803	0.00278749	yes
PRDM6	7:31950208-32058001	BVDV	CTRL	OK	0.596879	0.216101	-1.46574	0.00643727	yes
LOC781004	16:5919489-5978837	BVDV	CTRL	OK	0.540336	0.19634	-1.4605	0.00643727	yes
MARCO	2:71099066-71134082	BVDV	CTRL	OK	371.36	135.249	-1.4572	0.000603881	yes
LOC615162	22:15666660-15670177	BVDV	CTRL	OK	1.21029	0.441838	-1.45376	0.01456	yes
PCDH1	7:54624663-54639999	BVDV	CTRL	OK	1.76611	0.645137	-1.4529	0.000603881	yes
LOC539690	13:42244261-42247598	BVDV	CTRL	OK	28.5937	10.4502	-1.45217	0.000603881	yes
FMOD	16:925080-935131	BVDV	CTRL	OK	9.13725	3.35025	-1.44749	0.000603881	yes
GPIHBP1	14:2550268-2552230	BVDV	CTRL	OK	16.455	6.03352	-1.44745	0.000603881	yes
ELANE	7:44988171-44990573	BVDV	CTRL	OK	1.28089	0.475857	-1.42854	0.0296175	yes
WSCD2	17:66852835-66903763	BVDV	CTRL	OK	1.16258	0.43236	-1.42703	0.0109577	yes
CHI3L1	16:771322-781451	BVDV	CTRL	OK	14.7718	5.49361	-1.42702	0.000603881	yes
ANGPTL2	11:97780156-97975506	BVDV	CTRL	OK	6.21878	2.31893	-1.42317	0.000603881	yes
LOC523126	12:75664651-75870598	BVDV	CTRL	OK	11.8433	4.42267	-1.42108	0.000603881	yes
COL23A1	7:40674641-40694957	BVDV	CTRL	OK	2.83426	1.06632	-1.41034	0.000603881	yes
TFPI	2:8786392-8884005	BVDV	CTRL	OK	1.38272	0.520409	-1.40979	0.0101625	yes
CRLF1	7:4521072-4530910	BVDV	CTRL	OK	3.32712	1.25369	-1.4081	0.00110321	yes
CCL16	19:14781917-14786966	BVDV	CTRL	OK	15.5956	5.8786	-1.40759	0.000603881	yes
LAMA2	9:68514598-68665598	BVDV	CTRL	OK	0.429329	0.162263	-1.40375	0.00417128	yes
LOC100337486	21:70311856-70351845	BVDV	CTRL	OK	0.940403	0.355749	-1.40242	0.000603881	yes
LOC100302527	X:18627967-18629815	BVDV	CTRL	OK	1.39853	0.529837	-1.40029	0.00155501	yes
CLEC3B	22:54791196-54807471	BVDV	CTRL	OK	99.3901	37.6809	-1.39927	0.000603881	yes
COL6A3	3:117408826-117482330	BVDV	CTRL	OK	8.85508	3.35869	-1.39861	0.000603881	yes
LMOD1	16:49624530-49651879	BVDV	CTRL	OK	3.00919	1.14414	-1.39511	0.000603881	yes
AK1	11:98552023-98561576	BVDV	CTRL	OK	3.79051	1.44529	-1.39104	0.00278749	yes
COL18A1	1:146989202-147041015	BVDV	CTRL	OK	21.9851	8.38665	-1.39036	0.000603881	yes
GALNTL4	15:41624350-41980710	BVDV	CTRL	OK	7.34385	2.80688	-1.38757	0.000603881	yes
LOC539069	19:43523725-43544796	BVDV	CTRL	OK	3.26369	1.25931	-1.37387	0.000603881	yes
IRG1	12:52421740-52424165	BVDV	CTRL	OK	3.33913	1.29006	-1.37203	0.00110321	yes
FAM19A4	22:32698748-32906212	BVDV	CTRL	OK	1.63339	0.63132	-1.37143	0.00278749	yes
JAG2	21:71144434-71157066	BVDV	CTRL	OK	2.99624	1.16049	-1.36842	0.000603881	yes
IGFBP6	5:27044007-27047853	BVDV	CTRL	OK	19.8151	7.67859	-1.36769	0.000603881	yes
TMEM150B	18:62608570-62615882	BVDV	CTRL	OK	4.33736	1.68194	-1.36669	0.000603881	yes
VNN1	9:71833313-71851906	BVDV	CTRL	OK	1.6327	0.635621	-1.36103	0.00155501	yes
TMEM63C	10:89488355-89523829	BVDV	CTRL	OK	0.696607	0.27122	-1.36088	0.0123084	yes
MYOC	16:39957132-39971282	BVDV	CTRL	OK	12.1921	4.75343	-1.3589	0.000603881	yes
TAGLN	15:28318410-28323667	BVDV	CTRL	OK	78.9388	30.8683	-1.35461	0.000603881	yes
FZD10	17:47935473-47937432	BVDV	CTRL	OK	2.35786	0.925592	-1.34903	0.00110321	yes
STEAP4	4:72833496-72862037	BVDV	CTRL	OK	1.113	0.436972	-1.34884	0.00988715	yes
SNX21	13:75327438-75340080	BVDV	CTRL	OK	8.49431	3.33812	-1.34746	0.00110321	yes
MXRA5	X:138878611-138902892	BVDV	CTRL	OK	1.05079	0.413058	-1.34706	0.000603881	yes
CCDC80	1:57819989-57855630	BVDV	CTRL	OK	18.0087	7.09293	-1.34424	0.000603881	yes
MFAP2	2:136187692-136192151	BVDV	CTRL	OK	5.85377	2.30617	-1.34387	0.000603881	yes
COL16A1	2:122557457-122611965	BVDV	CTRL	OK	6.71211	2.64489	-1.34356	0.000603881	yes
FBLN7	11:197982-254157	BVDV	CTRL	OK	1.65217	0.651126	-1.34335	0.0078671	yes
COL4A6	X:61053063-61241381	BVDV	CTRL	OK	0.506022	0.199611	-1.34201	0.00197898	yes
SUSD2	17:73408383-73415956	BVDV	CTRL	OK	8.1994	3.2395	-1.33975	0.000603881	yes
CACNG4	19:63675905-63727618	BVDV	CTRL	OK	1.42125	0.561898	-1.33878	0.000603881	yes
LOC100297594	17:72929309-72937953	BVDV	CTRL	OK	5112.69	2021.99	-1.33831	0.000603881	yes
FLNC	4:93609407-93637173	BVDV	CTRL	OK	1.1459	0.453859	-1.33617	0.000603881	yes
C1QTNF7	6:115276057-115404039	BVDV	CTRL	OK	3.88084	1.53807	-1.33525	0.00110321	yes
LOC100125946	21:35135765-35137864	BVDV	CTRL	OK	12.3496	4.90298	-1.33273	0.000603881	yes
CDKN1C	29:49368786-49370793	BVDV	CTRL	OK	7.78877	3.09258	-1.33258	0.000603881	yes
STAB2	5:67612322-67784873	BVDV	CTRL	OK	22.8769	9.11529	-1.32753	0.000603881	yes
RAB3IL1	29:41112113-41130629	BVDV	CTRL	OK	25.5927	10.2091	-1.32587	0.000603881	yes
FUT7	11:106201877-106203263	BVDV	CTRL	OK	10.2749	4.11307	-1.32084	0.000603881	yes
TNXB	23:27083541-27140674	BVDV	CTRL	OK	2.42789	0.972302	-1.32023	0.000603881	yes
TMEM100	19:6236877-6242782	BVDV	CTRL	OK	7.18891	2.88639	-1.31651	0.000603881	yes
SIGLEC14	18:57997886-58000431	BVDV	CTRL	OK	3.21746	1.29319	-1.31499	0.00155501	yes
LTC4S	7:1418470-1421386	BVDV	CTRL	OK	7.72796	3.10752	-1.31432	0.00239673	yes
AQP1	4:65830988-65845186	BVDV	CTRL	OK	37.0468	14.9084	-1.31322	0.000603881	yes
FGL1	27:18447668-18472633	BVDV	CTRL	OK	4.99928	2.01553	-1.31056	0.000603881	yes
FCN2	11:106823025-106831643	BVDV	CTRL	OK	351.855	142.294	-1.30611	0.000603881	yes
COX4I2	13:61745577-61750870	BVDV	CTRL	OK	3.54785	1.43495	-1.30594	0.0128102	yes
PRKCDBP	15:47329715-47331336	BVDV	CTRL	OK	19.3989	7.85497	-1.3043	0.000603881	yes
IRX3	18:22692051-22694550	BVDV	CTRL	OK	2.97336	1.20427	-1.30394	0.00197898	yes
MAPK13	23:10036686-10045047	BVDV	CTRL	OK	0.962547	0.390048	-1.3032	0.0270934	yes
OIT3	28:29074091-29105089	BVDV	CTRL	OK	1.17546	0.477431	-1.29986	0.037551	yes
SLC6A15	5:14572185-14604741	BVDV	CTRL	OK	0.433705	0.176303	-1.29866	0.0174091	yes
GNG11	4:11074736-11079756	BVDV	CTRL	OK	40.7626	16.5795	-1.29784	0.000603881	yes
CCL14	19:14775261-14780085	BVDV	CTRL	OK	43.2069	17.5773	-1.29755	0.000603881	yes
C9H6orf225	9:38816217-38821062	BVDV	CTRL	OK	4.22153	1.71771	-1.29728	0.00814978	yes
GPR182	5:56773334-56775425	BVDV	CTRL	OK	19.1561	7.79865	-1.29651	0.000603881	yes
ISM1	13:6959810-7051654	BVDV	CTRL	OK	0.678747	0.276793	-1.29407	0.0138276	yes
C1QTNF5	15:30448398-30450337	BVDV	CTRL	OK	12.4889	5.10183	-1.29155	0.000603881	yes
LOC100337244	12:74550305-74760765	BVDV	CTRL	OK	5.23719	2.14011	-1.29111	0.000603881	yes
COL4A2	12:89056706-89166036	BVDV	CTRL	OK	12.0881	4.94166	-1.29052	0.000603881	yes
EFEMP1	11:38338745-38408288	BVDV	CTRL	OK	18.0099	7.38106	-1.28689	0.000603881	yes
S100A12	3:17164141-17165266	BVDV	CTRL	OK	30.097	12.3679	-1.28302	0.000603881	yes
PRKRA	2:18433085-18449878	BVDV	CTRL	OK	6.18602	2.54537	-1.28114	0.000603881	yes
SERPINF2	19:23403656-23411269	BVDV	CTRL	OK	0.8607	0.35456	-1.27948	0.0148201	yes
HEBP2	9:77215759-77222555	BVDV	CTRL	OK	1.46638	0.604145	-1.27929	0.0128102	yes
H19	29:50150774-50153147	BVDV	CTRL	OK	96.4813	39.7846	-1.27804	0.000603881	yes
LOC100848698	29:50705031-50711646	BVDV	CTRL	OK	10.0319	4.14262	-1.27598	0.000603881	yes
RHBDL1	25:553221-556680	BVDV	CTRL	OK	3.76392	1.55467	-1.27562	0.00239673	yes
CLEC14A	21:48843724-48845622	BVDV	CTRL	OK	5.34986	2.21288	-1.27357	0.000603881	yes
LMCD1	22:17961209-18018234	BVDV	CTRL	OK	7.5513	3.13056	-1.2703	0.000603881	yes
SPATA20	19:36799920-36807919	BVDV	CTRL	OK	7.18251	2.9915	-1.26362	0.000603881	yes
NFE2	5:25929034-25936083	BVDV	CTRL	OK	2.36254	0.984469	-1.26292	0.00612767	yes
LOC511180	18:56740588-56746722	BVDV	CTRL	OK	13.579	5.68209	-1.25689	0.000603881	yes
VASN	25:3508279-3561345	BVDV	CTRL	OK	11.4066	4.78852	-1.25222	0.0495295	yes
OSR1	11:79487138-79494239	BVDV	CTRL	OK	1.02326	0.429635	-1.25199	0.0155258	yes
AMN	21:69266380-69276985	BVDV	CTRL	OK	4.94914	2.07977	-1.25075	0.000603881	yes
F13A1	23:48633935-48776698	BVDV	CTRL	OK	9.53924	4.01007	-1.25025	0.000603881	yes
BNBD-9-LIKE	27:5221841-5227985	BVDV	CTRL	OK	7.33771	3.08539	-1.24988	0.00988715	yes
LOC781674	15:49073094-49075017	BVDV	CTRL	OK	1.65682	0.69701	-1.24917	0.0355951	yes
KCNQ1	29:49781450-49781899	BVDV	CTRL	OK	2.31849	0.975504	-1.24897	0.00239673	yes
LOC508666	19:14759735-14764912	BVDV	CTRL	OK	62.0602	26.1251	-1.24823	0.000603881	yes
HOXB2	19:38583392-38585653	BVDV	CTRL	OK	3.64154	1.53322	-1.24799	0.000603881	yes
EMR3	7:12206054-12271137	BVDV	CTRL	OK	0.797706	0.335991	-1.24744	0.0172033	yes
TMEM44	1:73516015-73559862	BVDV	CTRL	OK	3.00436	1.26565	-1.24718	0.000603881	yes
CPXM1	13:52844203-52850550	BVDV	CTRL	OK	13.6162	5.74142	-1.24584	0.000603881	yes
PADI4	2:135836955-135864707	BVDV	CTRL	OK	0.653891	0.276668	-1.24089	0.0281879	yes
ITIH4	22:48615396-48630388	BVDV	CTRL	OK	2.86569	1.21253	-1.24086	0.000603881	yes
LOC100848636	5:56214542-56222835	BVDV	CTRL	OK	1.62827	0.689379	-1.23997	0.00453214	yes
TBX2	19:11942208-11951631	BVDV	CTRL	OK	1.57771	0.668667	-1.23847	0.00155501	yes
OLFML3	3:29506173-29509176	BVDV	CTRL	OK	16.0955	6.82394	-1.23798	0.000603881	yes
ACPT	18:57310722-57315856	BVDV	CTRL	OK	1.57743	0.669099	-1.23729	0.0176268	yes
USHBP1	7:5768516-5777535	BVDV	CTRL	OK	7.55961	3.20753	-1.23685	0.000603881	yes
SHBG	19:27955572-27960099	BVDV	CTRL	OK	1.0114	0.429721	-1.23488	0.027764	yes
RNASE10	10:26631561-26632354	BVDV	CTRL	OK	2.19081	0.931474	-1.23387	0.0242875	yes
CYP27A1	2:107462686-107504971	BVDV	CTRL	OK	15.2411	6.48873	-1.23196	0.000603881	yes
GATA4	8:7478855-7527262	BVDV	CTRL	OK	0.68401	0.291472	-1.23066	0.01456	yes
DARC	3:10647479-10648919	BVDV	CTRL	OK	11.6395	4.96599	-1.22887	0.000603881	yes
COL4A1	12:88876124-89009422	BVDV	CTRL	OK	14.9701	6.40096	-1.22573	0.000603881	yes
FCGR1A	3:20847971-20856913	BVDV	CTRL	OK	6.21346	2.66184	-1.22297	0.000603881	yes
NPR1	3:16747640-16761172	BVDV	CTRL	OK	2.55755	1.096	-1.22251	0.000603881	yes
FAM13C	28:14904832-15136823	BVDV	CTRL	OK	2.74051	1.17475	-1.22209	0.000603881	yes
BCAM	18:52965137-52976446	BVDV	CTRL	OK	64.7809	27.8031	-1.22032	0.000603881	yes
LOC786974	20:6760132-6794235	BVDV	CTRL	OK	3.79761	1.63258	-1.21794	0.000603881	yes
GALNTL1	10:81396103-81494772	BVDV	CTRL	OK	5.05018	2.17111	-1.2179	0.000603881	yes
FOSB	18:53501994-53508418	BVDV	CTRL	OK	2.92883	1.25991	-1.21701	0.000603881	yes
APLNR	15:81734844-81738412	BVDV	CTRL	OK	0.774641	0.33324	-1.21697	0.0109577	yes
AOC3	19:43514250-43521180	BVDV	CTRL	OK	32.8934	14.1763	-1.21432	0.000603881	yes
CFH	16:6052922-6122554	BVDV	CTRL	OK	9.88171	4.2613	-1.21347	0.000603881	yes
CRIP2	21:71365857-71382666	BVDV	CTRL	OK	61.6745	26.6008	-1.21321	0.000603881	yes
EPDR1	4:50028935-50066473	BVDV	CTRL	OK	1.08744	0.469849	-1.21067	0.0123084	yes
RRAD	18:34746054-34749250	BVDV	CTRL	OK	6.71477	2.90545	-1.20858	0.000603881	yes
EXOC3L1	18:34940461-34946013	BVDV	CTRL	OK	5.47891	2.37484	-1.20606	0.000603881	yes
ESAM	29:28601859-28610589	BVDV	CTRL	OK	7.15387	3.10265	-1.20522	0.000603881	yes
PROS1	1:37803107-37866950	BVDV	CTRL	OK	51.7877	22.5686	-1.19829	0.000603881	yes
CAV1	4:52173109-52208687	BVDV	CTRL	OK	17.2457	7.52075	-1.19729	0.000603881	yes
LOC100297617	27:5788619-5790540	BVDV	CTRL	OK	8.50628	3.72908	-1.18971	0.0240704	yes
HSPB2	15:22571244-22572575	BVDV	CTRL	OK	9.15044	4.01161	-1.18966	0.000603881	yes
AHNAK2	21:71007316-71022057	BVDV	CTRL	OK	0.868067	0.380664	-1.18929	0.00239673	yes
LOC407171	18:63174841-63177879	BVDV	CTRL	OK	11.4517	5.03335	-1.18597	0.000603881	yes
SDC1	11:78687992-78719307	BVDV	CTRL	OK	6.16808	2.71288	-1.185	0.000603881	yes
ZNF521	24:31675532-32049400	BVDV	CTRL	OK	2.12149	0.933864	-1.18379	0.000603881	yes
FADS6	19:57141971-57157896	BVDV	CTRL	OK	7.65443	3.37142	-1.18294	0.000603881	yes
MECOM	1:98516454-99144558	BVDV	CTRL	OK	0.77305	0.34078	-1.18172	0.00155501	yes
DPF1	18:48250644-48258484	BVDV	CTRL	OK	1.06932	0.471386	-1.18171	0.0317318	yes
TREM1	23:15148070-15163188	BVDV	CTRL	OK	1.34354	0.592414	-1.18136	0.0311781	yes
CLEC4G	7:17785561-17789019	BVDV	CTRL	OK	209.479	92.6544	-1.17688	0.000603881	yes
SLC22A18	29:49332571-49351638	BVDV	CTRL	OK	3.83572	1.69976	-1.17417	0.00239673	yes
CDH5	18:34260149-34275150	BVDV	CTRL	OK	18.6766	8.27799	-1.17388	0.000603881	yes
TIE1	3:103278177-103297710	BVDV	CTRL	OK	14.493	6.4241	-1.17379	0.000603881	yes
LOC100140174	5:99599930-99632752	BVDV	CTRL	OK	3.18238	1.41096	-1.17343	0.0225653	yes
LOC100336823	29:44770858-44771621	BVDV	CTRL	OK	14.3355	6.35939	-1.17264	0.00453214	yes
QPRT	25:26747353-26762056	BVDV	CTRL	OK	1.97212	0.875102	-1.17223	0.0178144	yes
LOC785805	1:153531284-153656204	BVDV	CTRL	OK	1.6937	0.752038	-1.1713	0.000603881	yes
GRIK5	18:51529082-51579548	BVDV	CTRL	OK	0.635423	0.282198	-1.17101	0.0302321	yes
EHD2	18:55071167-55087455	BVDV	CTRL	OK	14.8148	6.5869	-1.16937	0.000603881	yes
CARD10	5:76286569-76312955	BVDV	CTRL	OK	6.89502	3.07284	-1.16598	0.000603881	yes
SOX7	8:8401285-8405958	BVDV	CTRL	OK	1.47111	0.655767	-1.16565	0.0393673	yes
CYGB	19:55846582-55856333	BVDV	CTRL	OK	10.4606	4.66992	-1.1635	0.000603881	yes
DOC2B	19:23041883-23067069	BVDV	CTRL	OK	2.64954	1.19002	-1.15475	0.00580788	yes
MZB1	7:52285861-52288594	BVDV	CTRL	OK	419.134	188.327	-1.15418	0.000603881	yes
TNFRSF17	25:10736934-10740164	BVDV	CTRL	OK	20.6476	9.28056	-1.15369	0.000603881	yes
ITGB5	1:69801836-69899675	BVDV	CTRL	OK	16.2386	7.30948	-1.15158	0.000603881	yes
SARDH	11:104578885-104636925	BVDV	CTRL	OK	1.36616	0.616678	-1.14754	0.00417128	yes
SHISA4	16:49618804-49621018	BVDV	CTRL	OK	25.1194	11.3513	-1.14594	0.000603881	yes
TFPI2	4:11035473-11039782	BVDV	CTRL	OK	8.0461	3.63655	-1.14572	0.000603881	yes
EMID1	17:70643237-70683858	BVDV	CTRL	OK	18.4727	8.37366	-1.14147	0.000603881	yes
PGCP	14:69287299-69893052	BVDV	CTRL	OK	1.50444	0.682729	-1.13984	0.00960826	yes
DHDH	18:55964767-55975733	BVDV	CTRL	OK	3.79946	1.72524	-1.139	0.00314915	yes
CSF3R	3:110001844-110012771	BVDV	CTRL	OK	5.05117	2.29492	-1.13818	0.000603881	yes
SLC2A4	19:27616612-27622203	BVDV	CTRL	OK	0.800777	0.363857	-1.13803	0.0249332	yes
NBL1	2:133610638-133641645	BVDV	CTRL	OK	20.1453	9.16869	-1.13566	0.000603881	yes
SLC35E4	17:71733168-71739630	BVDV	CTRL	OK	1.62091	0.738594	-1.13395	0.0208529	yes
CERCAM	11:99019920-99029867	BVDV	CTRL	OK	3.28713	1.49854	-1.13327	0.00110321	yes
LOC100847429	13:73298321-73303288	BVDV	CTRL	OK	0.780245	0.355708	-1.13323	0.0150533	yes
TCN2	17:71711465-71727449	BVDV	CTRL	OK	94.9246	43.2863	-1.13287	0.000603881	yes
ADAM15	3:15593180-15603336	BVDV	CTRL	OK	10.134	4.62623	-1.1313	0.000603881	yes
LOC508124	7:4207259-4223818	BVDV	CTRL	OK	14.4793	6.61043	-1.13117	0.000603881	yes
ANKRD33	5:28129633-28131909	BVDV	CTRL	OK	3.41052	1.55904	-1.12934	0.0187455	yes
MAPK12	5:119821434-119829363	BVDV	CTRL	OK	11.2348	5.14596	-1.12646	0.000603881	yes
HEY2	9:25873434-25884617	BVDV	CTRL	OK	0.790681	0.362974	-1.12323	0.0210864	yes
SEMA6C	3:19717291-19728951	BVDV	CTRL	OK	0.673335	0.309835	-1.11982	0.00902249	yes
COL11A2	23:7290454-7318840	BVDV	CTRL	OK	4.24744	1.95597	-1.11871	0.000603881	yes
LOC528412	12:73167278-73190990	BVDV	CTRL	OK	2.20392	1.01506	-1.1185	0.0169612	yes
LOC100336251	18:34193718-34215940	BVDV	CTRL	OK	5.51272	2.54468	-1.11528	0.00239673	yes
NXPH3	19:37670490-37672235	BVDV	CTRL	OK	2.00906	0.927498	-1.1151	0.00758658	yes
LOC100298891	12:71659808-71670786	BVDV	CTRL	OK	16.2478	7.50287	-1.11473	0.000603881	yes
2005-09-01	17:74799509-74811262	BVDV	CTRL	OK	4.25136	1.96379	-1.11428	0.000603881	yes
RBP1	1:130554555-130643416	BVDV	CTRL	OK	35.7846	16.5337	-1.11393	0.0176268	yes
APBB1	15:47245397-47267568	BVDV	CTRL	OK	6.04125	2.79511	-1.11194	0.000603881	yes
LOC100296063	10:24838282-24838985	BVDV	CTRL	OK	8.45853	3.9178	-1.11036	0.0101625	yes
CLSTN3	5:103581381-103611327	BVDV	CTRL	OK	0.567441	0.262873	-1.1101	0.0192173	yes
COL5A2	2:7139408-7300563	BVDV	CTRL	OK	6.59297	3.06048	-1.10717	0.000603881	yes
C28H10orf10	28:44940861-45014243	BVDV	CTRL	OK	19.337	8.98188	-1.10627	0.000603881	yes
TACC2	26:42407971-42546248	BVDV	CTRL	OK	0.765172	0.355702	-1.10511	0.0120531	yes
CRYBB1	17:68506966-68519005	BVDV	CTRL	OK	23.5468	10.9504	-1.10454	0.000603881	yes
HSPG2	2:131508855-131596962	BVDV	CTRL	OK	11.6507	5.42454	-1.10285	0.000603881	yes
LOC786126	21:35211413-35213375	BVDV	CTRL	OK	5.4806	2.55223	-1.10258	0.00932137	yes
NPDC1	11:106192005-106200933	BVDV	CTRL	OK	30.4939	14.2028	-1.10234	0.000603881	yes
ARSK	7:97276412-97331363	BVDV	CTRL	OK	3.40798	1.58807	-1.10165	0.00110321	yes
ELTD1	3:65921136-66062041	BVDV	CTRL	OK	2.62875	1.22618	-1.1002	0.000603881	yes
SLC9A3R2	25:1581873-1589620	BVDV	CTRL	OK	20.355	9.49543	-1.10008	0.000603881	yes
C19H17orf28	19:57076158-57097118	BVDV	CTRL	OK	15.3338	7.15524	-1.09964	0.000603881	yes
PTGDS	11:106247574-106250629	BVDV	CTRL	OK	350.22	163.538	-1.09863	0.000603881	yes
KCNS3	11:80842560-80858325	BVDV	CTRL	OK	3.11807	1.45606	-1.09858	0.00110321	yes
CLDN11	1:97788084-97802992	BVDV	CTRL	OK	9.41815	4.40621	-1.09591	0.000603881	yes
CES2	18:34757952-34770086	BVDV	CTRL	OK	1.25194	0.585775	-1.09574	0.014094	yes
KCNJ8	5:88852392-88860011	BVDV	CTRL	OK	5.79996	2.71472	-1.09524	0.000603881	yes
RBPMS2	10:45376233-45391975	BVDV	CTRL	OK	3.02171	1.41487	-1.09469	0.0133466	yes
IGF2	29:50046625-50065231	BVDV	CTRL	OK	71.8955	33.6796	-1.09403	0.000603881	yes
TMEM176A	4:114208684-114212313	BVDV	CTRL	OK	26.3476	12.3725	-1.09053	0.000603881	yes
GAS2L1	17:70719229-70724694	BVDV	CTRL	OK	12.3759	5.81973	-1.08851	0.000603881	yes
ITGA11	10:15102957-15236791	BVDV	CTRL	OK	0.695564	0.327267	-1.08772	0.0078671	yes
SNCG	28:41902560-41907125	BVDV	CTRL	OK	9.77953	4.61003	-1.08499	0.00197898	yes
RNF208	11:105878523-105879818	BVDV	CTRL	OK	3.87424	1.82725	-1.08424	0.00350101	yes
ALS2CL	22:53358572-53380721	BVDV	CTRL	OK	2.10291	0.992998	-1.08253	0.00110321	yes
WFDC1	18:10558019-10587119	BVDV	CTRL	OK	4.17103	1.96985	-1.08232	0.00350101	yes
TINAGL1	2:122685820-122697742	BVDV	CTRL	OK	8.35492	3.94622	-1.08215	0.000603881	yes
HEYL	3:107032467-107047976	BVDV	CTRL	OK	5.51529	2.60696	-1.08107	0.000603881	yes
EDN1	23:44010441-44017425	BVDV	CTRL	OK	1.72941	0.81747	-1.08105	0.00488964	yes
MFSD7	6:108855230-108863733	BVDV	CTRL	OK	37.2343	17.6005	-1.08101	0.000603881	yes
C1QTNF9	12:34540960-34548866	BVDV	CTRL	OK	13.5655	6.41579	-1.08024	0.000603881	yes
GDF1	7:4264309-4266113	BVDV	CTRL	OK	19.8189	9.37349	-1.08022	0.000603881	yes
MAGIX	X:92283810-92291669	BVDV	CTRL	OK	2.46252	1.16475	-1.08012	0.0104295	yes
GAS6	12:90821597-90867613	BVDV	CTRL	OK	58.2512	27.6426	-1.07539	0.000603881	yes
FOLR2	15:52602818-52605539	BVDV	CTRL	OK	101.586	48.2402	-1.07439	0.000603881	yes
PTGS1	11:93219286-93245048	BVDV	CTRL	OK	11.6142	5.51577	-1.07425	0.000603881	yes
HSF4	18:34922976-34927750	BVDV	CTRL	OK	51.0339	24.2566	-1.07308	0.000603881	yes
DES	2:108075459-108082535	BVDV	CTRL	OK	39.6179	18.839	-1.07243	0.000603881	yes
MRGPRF	29:47009942-47019518	BVDV	CTRL	OK	4.63062	2.20232	-1.07218	0.000603881	yes
LOC523451	10:82632547-82668258	BVDV	CTRL	OK	1.77052	0.842574	-1.0713	0.00314915	yes
VWF	5:104603431-104727430	BVDV	CTRL	OK	15.1103	7.19081	-1.0713	0.000603881	yes
LOXL1	21:35058002-35081938	BVDV	CTRL	OK	4.59223	2.18732	-1.07003	0.00110321	yes
COL21A1	23:3946456-4181456	BVDV	CTRL	OK	1.26378	0.601958	-1.07001	0.00239673	yes
OSBPL5	29:49122351-49157927	BVDV	CTRL	OK	6.09117	2.90684	-1.06727	0.000603881	yes
MDK	17:21513530-21516846	BVDV	CTRL	OK	74.25	35.4772	-1.0655	0.000603881	yes
RASIP1	18:55810632-55824241	BVDV	CTRL	OK	11.7057	5.61222	-1.06056	0.000603881	yes
TMEM158	22:54635350-54636968	BVDV	CTRL	OK	4.2444	2.03655	-1.05943	0.00197898	yes
TULP3	5:107343151-107373637	BVDV	CTRL	OK	5.39309	2.59167	-1.05723	0.000603881	yes
EPHB4	25:36347293-36400930	BVDV	CTRL	OK	6.99227	3.36046	-1.0571	0.000603881	yes
ME1	9:23400883-23590196	BVDV	CTRL	OK	0.647647	0.311397	-1.05645	0.0215097	yes
MASP1	1:80596923-80649367	BVDV	CTRL	OK	1.59264	0.766011	-1.05599	0.00197898	yes
NUDT14	21:71160884-71167980	BVDV	CTRL	OK	8.36234	4.02461	-1.05506	0.00580788	yes
MRAP	1:2462824-2476980	BVDV	CTRL	OK	5.33921	2.56977	-1.05499	0.0115338	yes
ACE2	X:135148995-135198063	BVDV	CTRL	OK	0.414858	0.199693	-1.05483	0.0479558	yes
VWA1	16:52360274-52365505	BVDV	CTRL	OK	18.7114	9.00915	-1.05446	0.000603881	yes
LOC100848509	25:41175774-41197256	BVDV	CTRL	OK	6.97631	3.36306	-1.05269	0.00932137	yes
PCOLCE2	1:127132776-127229654	BVDV	CTRL	OK	3.93309	1.89642	-1.05238	0.000603881	yes
NAPRT1	14:2327869-2331019	BVDV	CTRL	OK	13.9575	6.73029	-1.0523	0.000603881	yes
LOC615144	19:44782787-44792887	BVDV	CTRL	OK	2.21523	1.06873	-1.05155	0.00110321	yes
OLR1	5:100244326-100255632	BVDV	CTRL	OK	1.11016	0.536084	-1.05024	0.035793	yes
FAM167B	2:122115658-122117248	BVDV	CTRL	OK	5.21048	2.52465	-1.04533	0.00551311	yes
NRTN	7:19743597-19747317	BVDV	CTRL	OK	17.6156	8.53967	-1.0446	0.000603881	yes
CAPG	11:49423730-49438680	BVDV	CTRL	OK	29.6218	14.3639	-1.04421	0.000603881	yes
SCARF2	17:74523148-74535584	BVDV	CTRL	OK	6.88505	3.34261	-1.04249	0.000603881	yes
KDR	6:72232848-72277699	BVDV	CTRL	OK	21.2156	10.3095	-1.04115	0.000603881	yes
FBXL7	20:57298327-57780314	BVDV	CTRL	OK	5.18085	2.51964	-1.03997	0.000603881	yes
PLXND1	22:56774895-56825062	BVDV	CTRL	OK	22.7773	11.0839	-1.03913	0.000603881	yes
HOXD9	2:20823765-20826774	BVDV	CTRL	OK	2.41656	1.17692	-1.03794	0.00350101	yes
SELM	17:72064475-72068000	BVDV	CTRL	OK	27.003	13.1644	-1.03647	0.000603881	yes
ACTA2	26:10662362-10679648	BVDV	CTRL	OK	78.2434	38.1499	-1.03629	0.000603881	yes
SHD	7:21002489-21010652	BVDV	CTRL	OK	1.48168	0.723061	-1.03504	0.026859	yes
ANGPTL4	7:18236516-18243587	BVDV	CTRL	OK	15.0722	7.35687	-1.03473	0.000603881	yes
PCDH12	7:54690459-54702923	BVDV	CTRL	OK	2.48433	1.21404	-1.03304	0.000603881	yes
PTN	4:101685423-101795483	BVDV	CTRL	OK	6.8344	3.33987	-1.03302	0.000603881	yes
MRC2	19:47689028-47748130	BVDV	CTRL	OK	2.91061	1.42261	-1.03279	0.000603881	yes
FAM129B	11:98231337-98283781	BVDV	CTRL	OK	7.41376	3.62604	-1.03181	0.000603881	yes
MMRN2	28:41886155-41901491	BVDV	CTRL	OK	2.77155	1.35655	-1.03075	0.000603881	yes
GPR123	26:50854828-50889484	BVDV	CTRL	OK	1.09938	0.538694	-1.02915	0.0332928	yes
THSD1	12:21669555-21697383	BVDV	CTRL	OK	4.85456	2.37876	-1.02913	0.000603881	yes
HEPH	X:99644001-99768588	BVDV	CTRL	OK	4.44541	2.17832	-1.0291	0.000603881	yes
ROBO4	29:28719987-28734705	BVDV	CTRL	OK	4.59798	2.25391	-1.02857	0.000603881	yes
GABRD	16:51963930-51974494	BVDV	CTRL	OK	2.85552	1.40171	-1.02657	0.00551311	yes
ACP5	7:17134326-17137968	BVDV	CTRL	OK	370.582	182.113	-1.02496	0.000603881	yes
SMAD6	10:13507073-13583546	BVDV	CTRL	OK	2.75572	1.35506	-1.02407	0.00197898	yes
BCL6B	19:27447121-27451108	BVDV	CTRL	OK	2.71619	1.33641	-1.02323	0.00988715	yes
C3H1orf192	3:8160870-8193427	BVDV	CTRL	OK	4.59368	2.26056	-1.02297	0.00110321	yes
MRO	24:50786811-50809920	BVDV	CTRL	OK	2.07695	1.02237	-1.02255	0.0327456	yes
SLC38A11	2:31391773-31446946	BVDV	CTRL	OK	3.35883	1.65397	-1.02203	0.00488964	yes
AEBP1	4:77881912-77891706	BVDV	CTRL	OK	33.1349	16.3489	-1.01916	0.000603881	yes
CPE	17:546401-697923	BVDV	CTRL	OK	0.790177	0.390214	-1.01791	0.0217397	yes
SERTAD4	16:74993031-75000062	BVDV	CTRL	OK	0.537151	0.265339	-1.01749	0.0345167	yes
LOC785541	3:101173830-101176387	BVDV	CTRL	OK	2.58739	1.28044	-1.01486	0.0363837	yes
C11H9orf167	11:105837723-105839992	BVDV	CTRL	OK	32.885	16.2815	-1.0142	0.000603881	yes
IGFBP7	6:74027218-74150456	BVDV	CTRL	OK	310.059	153.58	-1.01355	0.000603881	yes
BCL2L15	3:29643175-29648016	BVDV	CTRL	OK	23.0031	11.3961	-1.01329	0.000603881	yes
LOC786625	15:55237489-55238659	BVDV	CTRL	OK	3.07454	1.52462	-1.01192	0.025589	yes
NOL3	18:34928331-34931933	BVDV	CTRL	OK	11.2318	5.57167	-1.01141	0.00155501	yes
S100A1	3:16812601-16816399	BVDV	CTRL	OK	62.789	31.1546	-1.01107	0.000603881	yes
MEOX2	4:23943513-24019359	BVDV	CTRL	OK	16.4733	8.17569	-1.01072	0.000603881	yes
CCDC8	18:54124478-54127115	BVDV	CTRL	OK	1.67363	0.831091	-1.0099	0.00703952	yes
IER5L	11:99644906-99646485	BVDV	CTRL	OK	12.7371	6.33251	-1.00819	0.000603881	yes
GTF2IRD1	25:33414237-33493476	BVDV	CTRL	OK	2.10976	1.04969	-1.00712	0.00197898	yes
RASD2	5:74106328-74117624	BVDV	CTRL	OK	1.95968	0.976572	-1.00482	0.00350101	yes
PTRF	19:43148012-43162165	BVDV	CTRL	OK	20.7774	10.3604	-1.00394	0.000603881	yes
RBP4	26:14940550-14946750	BVDV	CTRL	OK	11.2783	5.63128	-1.00202	0.00155501	yes
SDS	17:63302946-63311101	BVDV	CTRL	OK	28.2566	14.1263	-1.0002	0.000603881	yes
HLX	16:25059266-25064943	BVDV	CTRL	OK	8.63349	4.32327	-0.99782	0.000603881	yes
MGP	5:95456474-95459986	BVDV	CTRL	OK	395.479	198.077	-0.997539	0.000603881	yes
MMP19	5:57751505-57757617	BVDV	CTRL	OK	5.87011	2.94171	-0.996733	0.000603881	yes
DPEP3	18:35576306-35580517	BVDV	CTRL	OK	2.20594	1.10595	-0.996107	0.0138276	yes
WIPI1	19:62368394-62479266	BVDV	CTRL	OK	5.569	2.79307	-0.995568	0.0133466	yes
PPFIA4	16:553234-589649	BVDV	CTRL	OK	1.59644	0.801667	-0.993788	0.000603881	yes
KANK3	7:18200290-18210847	BVDV	CTRL	OK	13.9067	6.9842	-0.993612	0.000603881	yes
NINJ2	5:107937355-108009649	BVDV	CTRL	OK	2.89954	1.45704	-0.992789	0.0242875	yes
SEMA3B	22:50655220-50661989	BVDV	CTRL	OK	5.70222	2.87024	-0.990353	0.000603881	yes
CD209	7:17811221-17814125	BVDV	CTRL	OK	129.817	65.405	-0.989007	0.000603881	yes
CDC42EP1	5:109925708-109933543	BVDV	CTRL	OK	32.7554	16.5272	-0.986893	0.000603881	yes
KRT19	19:42366659-42370493	BVDV	CTRL	OK	6.34433	3.20252	-0.986263	0.00110321	yes
LOC525407	1:72024434-72049598	BVDV	CTRL	OK	1.16545	0.588398	-0.986027	0.0187455	yes
IL11RA	8:77361674-77368156	BVDV	CTRL	OK	9.87007	4.9913	-0.983644	0.000603881	yes
MTUS1	27:18632851-18698059	BVDV	CTRL	OK	5.35865	2.71113	-0.982976	0.000603881	yes
KCNMA1	28:32824639-33588126	BVDV	CTRL	OK	0.581023	0.293979	-0.982884	0.0125717	yes
PROCR	13:65052809-65106553	BVDV	CTRL	OK	18.7178	9.4775	-0.981829	0.000603881	yes
SPON1	15:38991043-39309268	BVDV	CTRL	OK	4.48361	2.27283	-0.98017	0.000603881	yes
PLAT	27:36738827-36762837	BVDV	CTRL	OK	44.4262	22.5319	-0.979441	0.000603881	yes
LOC787578	13:32530316-32645041	BVDV	CTRL	OK	38.587	19.5803	-0.97871	0.000603881	yes
LOC515150	16:4998440-5006453	BVDV	CTRL	OK	208.357	105.763	-0.97822	0.000603881	yes
IGFBP4	19:41326677-41338267	BVDV	CTRL	OK	173.726	88.2945	-0.976422	0.000603881	yes
NID1	28:8731594-8830045	BVDV	CTRL	OK	7.63012	3.87792	-0.976422	0.000603881	yes
BOK	3:121098865-121111324	BVDV	CTRL	OK	20.4425	10.4029	-0.974585	0.000603881	yes
ANXA4	11:68070486-68144492	BVDV	CTRL	OK	44.4638	22.6289	-0.974466	0.000603881	yes
FAH	21:26610000-26643315	BVDV	CTRL	OK	4.54131	2.31181	-0.974083	0.00197898	yes
RASGRP4	18:48481120-48494788	BVDV	CTRL	OK	11.7611	5.98726	-0.974053	0.000603881	yes
ASPA	19:24825865-24847110	BVDV	CTRL	OK	11.6558	5.9341	-0.973953	0.000603881	yes
TSPAN11	5:106975988-107038066	BVDV	CTRL	OK	13.8547	7.06057	-0.972519	0.000603881	yes
ADM	15:42911042-42913326	BVDV	CTRL	OK	45.9137	23.4215	-0.971094	0.000603881	yes
CORO2B	10:15393818-15559611	BVDV	CTRL	OK	4.59349	2.34361	-0.970858	0.00110321	yes
ASPHD2	17:68354332-68363383	BVDV	CTRL	OK	12.107	6.18029	-0.970093	0.000603881	yes
RNASE6	10:26402505-26404000	BVDV	CTRL	OK	151.183	77.2075	-0.969485	0.000603881	yes
SLC24A3	13:39202455-39632869	BVDV	CTRL	OK	2.63252	1.34526	-0.968561	0.00673997	yes
GMPR	23:40616325-40677006	BVDV	CTRL	OK	16.8494	8.61408	-0.967925	0.000603881	yes
SPARCL1	6:104149823-104202396	BVDV	CTRL	OK	27.1516	13.8836	-0.967658	0.000603881	yes
FAM171A1	13:30067760-30123390	BVDV	CTRL	OK	4.84151	2.47642	-0.967204	0.000603881	yes
MANSC1	5:97925814-97949863	BVDV	CTRL	OK	5.92778	3.03647	-0.965095	0.000603881	yes
LOC510406	3:86609660-86641519	BVDV	CTRL	OK	2.38259	1.22127	-0.96415	0.00521093	yes
LYPD1	2:65216982-65279824	BVDV	CTRL	OK	1.22501	0.628	-0.963955	0.00872462	yes
HES2	16:47798008-47800503	BVDV	CTRL	OK	3.20532	1.64351	-0.96369	0.00417128	yes
ASS1	11:100791338-100843337	BVDV	CTRL	OK	4.42499	2.26946	-0.963322	0.00386315	yes
TENC1	5:27068593-27082523	BVDV	CTRL	OK	19.745	10.1288	-0.963026	0.000603881	yes
ARMCX1	X:55368950-55370792	BVDV	CTRL	OK	5.35527	2.74722	-0.962988	0.000603881	yes
FLVCR2	10:87160746-87200982	BVDV	CTRL	OK	6.64966	3.41277	-0.962338	0.000603881	yes
REEP1	11:48389167-48525025	BVDV	CTRL	OK	1.07526	0.551855	-0.96233	0.0229618	yes
LOC614781	X:39258761-39268368	BVDV	CTRL	OK	3.80194	1.95455	-0.959903	0.00580788	yes
TMEM37	2:71607733-71613808	BVDV	CTRL	OK	26.0673	13.4166	-0.958219	0.000603881	yes
TIMP2	19:54079296-54131054	BVDV	CTRL	OK	59.8785	30.8274	-0.957825	0.000603881	yes
VNN2	9:71884620-71913826	BVDV	CTRL	OK	3.13528	1.61423	-0.957751	0.00350101	yes
GSN	8:112578065-112639759	BVDV	CTRL	OK	125.454	64.6354	-0.956767	0.000603881	yes
NOS2	19:19758763-19790464	BVDV	CTRL	OK	2.19907	1.13426	-0.955148	0.00197898	yes
C7H19orf21	7:44942016-44951963	BVDV	CTRL	OK	1.84017	0.950685	-0.952803	0.00988715	yes
C15H11orf96	15:74915917-74917297	BVDV	CTRL	OK	50.7203	26.2126	-0.9523	0.000603881	yes
USH1C	15:35500364-35548981	BVDV	CTRL	OK	1.07133	0.554552	-0.950013	0.0354084	yes
MMP14	10:21806053-21814533	BVDV	CTRL	OK	41.6339	21.5543	-0.949784	0.000603881	yes
LOC100336673	7:4875572-4904688	BVDV	CTRL	OK	1.16727	0.604804	-0.948599	0.00239673	yes
LOC505037	7:11439933-11494856	BVDV	CTRL	OK	6.99876	3.6279	-0.947963	0.000603881	yes
TNFSF18	16:41541494-41552708	BVDV	CTRL	OK	0.927812	0.48103	-0.947707	0.0201535	yes
CXCL6	6:90645963-90648082	BVDV	CTRL	OK	1.84771	0.958772	-0.94648	0.0309565	yes
WDR86	4:114730381-114755250	BVDV	CTRL	OK	9.46656	4.91387	-0.945981	0.000603881	yes
CFP	X:91441701-91447087	BVDV	CTRL	OK	103.776	53.8701	-0.945921	0.000603881	yes
NR5A2	16:80751685-80879974	BVDV	CTRL	OK	1.56498	0.812539	-0.945635	0.00155501	yes
NAGLU	19:43258821-43265802	BVDV	CTRL	OK	17.6169	9.1526	-0.944705	0.000603881	yes
IGSF10	1:117532035-117545609	BVDV	CTRL	OK	1.16737	0.606613	-0.944411	0.000603881	yes
EMILIN1	11:72539295-72547260	BVDV	CTRL	OK	20.8292	10.8242	-0.94434	0.000603881	yes
SOWAHD	X:3969067-3970030	BVDV	CTRL	OK	5.5574	2.88878	-0.94395	0.0112595	yes
LRP11	9:88113877-88183314	BVDV	CTRL	OK	1.14656	0.596072	-0.94375	0.0123084	yes
ENHO	8:77234222-77236116	BVDV	CTRL	OK	4.36368	2.26994	-0.942895	0.0150533	yes
RETN	7:17737515-17738903	BVDV	CTRL	OK	6.54667	3.40601	-0.94268	0.0315337	yes
ARNT2	21:26811820-26966820	BVDV	CTRL	OK	1.09157	0.568084	-0.94223	0.00197898	yes
LOC100848191	18:50173267-50202362	BVDV	CTRL	OK	8.5347	4.44358	-0.941618	0.000603881	yes
TPBG	9:22454646-22456609	BVDV	CTRL	OK	1.64256	0.855559	-0.941009	0.0199155	yes
CTSL2	8:84976252-84981458	BVDV	CTRL	OK	9.8202	5.11542	-0.940899	0.000603881	yes
PRSS23	29:8788701-8797308	BVDV	CTRL	OK	15.0428	7.83668	-0.940761	0.000603881	yes
ZNF205	25:2556669-2565298	BVDV	CTRL	OK	7.0645	3.68036	-0.940742	0.000603881	yes
DCN	5:21080009-21119087	BVDV	CTRL	OK	122.92	64.051	-0.94043	0.000603881	yes
PPP1R26	11:106460669-106465659	BVDV	CTRL	OK	3.91188	2.03935	-0.939754	0.000603881	yes
LAMA5	13:55379921-55432867	BVDV	CTRL	OK	3.45974	1.80475	-0.938866	0.000603881	yes
C1H21orf63	1:2258668-2360034	BVDV	CTRL	OK	2.80514	1.46386	-0.938296	0.00580788	yes
PKHD1L1	14:57049152-57216589	BVDV	CTRL	OK	1.22369	0.638641	-0.938156	0.000603881	yes
SPIRE2	18:14694398-14728839	BVDV	CTRL	OK	9.33062	4.87075	-0.937831	0.00197898	yes
TGFBI	7:49040287-49095978	BVDV	CTRL	OK	55.5285	29.0249	-0.935938	0.000603881	yes
TNNI2	29:50285048-50287648	BVDV	CTRL	OK	6.01176	3.14456	-0.934932	0.0247279	yes
COL15A1	8:64437275-64540739	BVDV	CTRL	OK	14.2016	7.43676	-0.933307	0.000603881	yes
ARSG	19:62368394-62479266	BVDV	CTRL	OK	14.2612	7.47276	-0.932387	0.000603881	yes
COL4A5	X:61504034-61825106	BVDV	CTRL	OK	1.35539	0.710237	-0.932334	0.00155501	yes
FGD5	22:58037190-58148608	BVDV	CTRL	OK	4.8017	2.51641	-0.932182	0.000603881	yes
AMPD3	15:42758941-42800251	BVDV	CTRL	OK	2.24701	1.17803	-0.931634	0.00239673	yes
EPHB1	1:135191076-135658387	BVDV	CTRL	OK	0.744943	0.390641	-0.931287	0.0231922	yes
RAMP2	19:43441582-43443429	BVDV	CTRL	OK	95.9215	50.307	-0.931095	0.000603881	yes
A2M	5:101298126-101346611	BVDV	CTRL	OK	94.5518	49.6035	-0.930662	0.000603881	yes
FAM176B	3:110118544-110120286	BVDV	CTRL	OK	22.598	11.866	-0.929364	0.000603881	yes
C1QC	2:130783985-130788357	BVDV	CTRL	OK	1565.12	823.085	-0.92716	0.000603881	yes
UAP1L1	11:106155865-106161939	BVDV	CTRL	OK	17.7841	9.35573	-0.926664	0.000603881	yes
ELFN2	5:76173494-76175969	BVDV	CTRL	OK	2.36436	1.24447	-0.925922	0.0101625	yes
TM4SF1	1:119750362-119758889	BVDV	CTRL	OK	31.8692	16.7813	-0.925311	0.000603881	yes
SRPX	X:110531878-110672969	BVDV	CTRL	OK	10.5855	5.58092	-0.923509	0.000603881	yes
KCNMB1	20:2159471-2172275	BVDV	CTRL	OK	1.1898	0.627977	-0.921936	0.0327456	yes
LIMS2	2:4780175-4819192	BVDV	CTRL	OK	23.7236	12.5222	-0.921833	0.000603881	yes
PRELP	16:1049457-1053560	BVDV	CTRL	OK	3.62416	1.91509	-0.920237	0.0178144	yes
HOXA5	4:69353605-69356273	BVDV	CTRL	OK	6.69679	3.53927	-0.920017	0.000603881	yes
GPC1	3:120383560-120476582	BVDV	CTRL	OK	22.2241	11.7469	-0.919846	0.000603881	yes
PODXL2	22:60507603-60556979	BVDV	CTRL	OK	1.67708	0.886876	-0.91915	0.030028	yes
PLVAP	7:5685230-5704118	BVDV	CTRL	OK	45.4533	24.042	-0.918827	0.000603881	yes
ALDH3B1	29:46188320-46203015	BVDV	CTRL	OK	6.8552	3.62658	-0.91859	0.000603881	yes
TJP2	8:45598158-45696888	BVDV	CTRL	OK	2.42269	1.28172	-0.918529	0.00155501	yes
ALOX5	28:44729722-44776997	BVDV	CTRL	OK	12.1754	6.44408	-0.917929	0.000603881	yes
MAPK11	5:119831095-119837101	BVDV	CTRL	OK	12.9888	6.87545	-0.917744	0.000603881	yes
ASGR1	19:27529096-27532634	BVDV	CTRL	OK	1.97831	1.04758	-0.917208	0.0471171	yes
WIPF3	4:66853804-66931528	BVDV	CTRL	OK	3.58714	1.90002	-0.916823	0.000603881	yes
APOD	1:72670962-72684270	BVDV	CTRL	OK	34.151	18.1102	-0.915124	0.000603881	yes
IGJ	6:87759434-87768832	BVDV	CTRL	OK	2259.96	1198.83	-0.914665	0.0107026	yes
IGF1	5:66532878-66604699	BVDV	CTRL	OK	10.2117	5.42165	-0.913416	0.00417128	yes
TSPEAR	1:145940970-146036383	BVDV	CTRL	OK	5.26991	2.79965	-0.912533	0.000603881	yes
EMILIN2	24:37496730-37556313	BVDV	CTRL	OK	11.9286	6.33745	-0.91245	0.000603881	yes
PRKAR1B	25:42490443-42549275	BVDV	CTRL	OK	18.9194	10.0527	-0.91229	0.000603881	yes
FAM109A	17:57350722-57353338	BVDV	CTRL	OK	1.11917	0.594738	-0.912102	0.0402226	yes
GPNMB	4:32010891-32037151	BVDV	CTRL	OK	31.6697	16.8298	-0.912086	0.000603881	yes
LOC506672	2:122496702-122533253	BVDV	CTRL	OK	0.614812	0.326884	-0.911365	0.030404	yes
UBTD1	26:18575001-18625620	BVDV	CTRL	OK	16.3177	8.69476	-0.908216	0.000603881	yes
CRISPLD2	18:10985131-11050908	BVDV	CTRL	OK	7.53234	4.01467	-0.907815	0.000603881	yes
CUEDC1	19:8900988-8974286	BVDV	CTRL	OK	5.08755	2.71549	-0.90576	0.000603881	yes
PALM	7:44923935-44940803	BVDV	CTRL	OK	23.8351	12.7231	-0.905633	0.000603881	yes
CACHD1	3:81118833-81353429	BVDV	CTRL	OK	0.689561	0.368106	-0.905557	0.0135943	yes
PMP22	19:33357139-33382707	BVDV	CTRL	OK	3.43717	1.83508	-0.905378	0.00580788	yes
SPARC	7:64862329-64900826	BVDV	CTRL	OK	178.678	95.4072	-0.905193	0.000603881	yes
ATP2C2	18:10609485-10688582	BVDV	CTRL	OK	1.66092	0.886931	-0.905086	0.00488964	yes
C7	20:33549484-33606517	BVDV	CTRL	OK	191.494	102.293	-0.90459	0.000603881	yes
LOC100849059	7:62809480-62812367	BVDV	CTRL	OK	11.45	6.11786	-0.904253	0.0270934	yes
PLXDC1	19:40226035-40293157	BVDV	CTRL	OK	1.17304	0.627679	-0.902157	0.027764	yes
MS4A7	15:84526490-84543454	BVDV	CTRL	OK	45.2247	24.2008	-0.902058	0.000603881	yes
HTRA1	26:42659746-42717176	BVDV	CTRL	OK	39.0047	20.8817	-0.901411	0.000603881	yes
KEL	4:107069036-107154411	BVDV	CTRL	OK	8.40697	4.50106	-0.901322	0.000603881	yes
ERG	1:152379402-152515109	BVDV	CTRL	OK	11.2767	6.03912	-0.900935	0.000603881	yes
ITIH5	13:16278274-16404469	BVDV	CTRL	OK	0.928108	0.497116	-0.900709	0.0313563	yes
HS1BP3	11:78277226-78323260	BVDV	CTRL	OK	7.12119	3.81599	-0.90006	0.000603881	yes
ZNF423	18:18041275-18392207	BVDV	CTRL	OK	4.12151	2.20942	-0.899501	0.000603881	yes
FNDC1	9:97010522-97044679	BVDV	CTRL	OK	9.90983	5.31368	-0.89915	0.000603881	yes
CEACAM6	18:51765356-51780795	BVDV	CTRL	OK	6.75214	3.62135	-0.898816	0.00417128	yes
PLCD3	19:45411511-45432420	BVDV	CTRL	OK	5.46716	2.93348	-0.898177	0.000603881	yes
UNC93A	9:103537373-103566013	BVDV	CTRL	OK	3.40544	1.82754	-0.897936	0.00733648	yes
SH3BGR	1:141029748-141100993	BVDV	CTRL	OK	5.19206	2.78854	-0.896797	0.00453213	yes
TIMP1	X:91232234-91236073	BVDV	CTRL	OK	46.7173	25.0956	-0.896522	0.000603881	yes
JUP	19:42603639-42616655	BVDV	CTRL	OK	17.9451	9.64441	-0.895826	0.000603881	yes
LOC100848676	15:33277519-33289456	BVDV	CTRL	OK	2.84018	1.52748	-0.894828	0.0215097	yes
LINGO1	21:33291475-33310122	BVDV	CTRL	OK	1.21812	0.655129	-0.894803	0.0235985	yes
PLD3	18:49995630-50005034	BVDV	CTRL	OK	150.44	81.0944	-0.891513	0.000603881	yes
ARHGEF15	19:28541732-28550394	BVDV	CTRL	OK	3.38195	1.82357	-0.891088	0.000603881	yes
DYRK3	16:4274966-4284962	BVDV	CTRL	OK	1.88328	1.01663	-0.889455	0.0221551	yes
DMPK	18:53759918-53769638	BVDV	CTRL	OK	3.12983	1.69087	-0.888317	0.00551311	yes
GPR153	16:47942385-47949761	BVDV	CTRL	OK	1.71103	0.926187	-0.885486	0.00417128	yes
LOC100848128	11:106192005-106200933	BVDV	CTRL	OK	83.183	45.0515	-0.884711	0.00110321	yes
PLEKHH3	19:43366277-43374706	BVDV	CTRL	OK	9.00226	4.87635	-0.884485	0.000603881	yes
LOC100848839	5:103972414-103986748	BVDV	CTRL	OK	11.6106	6.28948	-0.884425	0.000603881	yes
LOC100294726	7:70448105-70481860	BVDV	CTRL	OK	5.61636	3.04257	-0.884347	0.00197898	yes
GPRC5C	19:57642747-57655943	BVDV	CTRL	OK	8.41697	4.56234	-0.883527	0.000603881	yes
NPL	16:65330450-65369037	BVDV	CTRL	OK	16.6859	9.04689	-0.883137	0.000603881	yes
CD163	5:102245936-102278444	BVDV	CTRL	OK	75.8869	41.1773	-0.882002	0.000603881	yes
GPX3	7:64286947-64295117	BVDV	CTRL	OK	63.9384	34.7152	-0.881114	0.000603881	yes
GATM	10:65325341-65341356	BVDV	CTRL	OK	2.2015	1.19564	-0.880701	0.0109577	yes
RCN3	18:56422332-56430761	BVDV	CTRL	OK	42.577	23.1334	-0.880099	0.000603881	yes
LOC525353	26:49502193-49615370	BVDV	CTRL	OK	5.10773	2.77598	-0.879687	0.000603881	yes
LOC100848971	19:43148012-43162165	BVDV	CTRL	OK	29.5902	16.0912	-0.878843	0.00386315	yes
RASA4	25:35064312-35086722	BVDV	CTRL	OK	8.83833	4.80643	-0.878809	0.000603881	yes
LOC618071	7:21665538-21667783	BVDV	CTRL	OK	9.69428	5.27414	-0.878198	0.00110321	yes
PKN3	11:99232118-99249580	BVDV	CTRL	OK	10.7885	5.87049	-0.87794	0.000603881	yes
DDAH1	3:58808969-58965541	BVDV	CTRL	OK	0.792083	0.431137	-0.877506	0.0225653	yes
ITGB4	19:56472335-56506801	BVDV	CTRL	OK	5.54245	3.01954	-0.876195	0.000603881	yes
RHPN1	14:2462324-2471326	BVDV	CTRL	OK	1.53985	0.839111	-0.87586	0.0354084	yes
HSPB6	18:46654239-46656762	BVDV	CTRL	OK	10.9227	5.95511	-0.875125	0.000603881	yes
SCARF1	19:23309062-23319778	BVDV	CTRL	OK	18.4129	10.0408	-0.874837	0.000603881	yes
ABCC3	19:36676546-36724513	BVDV	CTRL	OK	5.35122	2.92003	-0.873883	0.000603881	yes
S100A13	3:16818415-16824126	BVDV	CTRL	OK	68.5887	37.4376	-0.873483	0.000603881	yes
FNDC4	11:72149848-72183229	BVDV	CTRL	OK	5.63849	3.07951	-0.872607	0.0160094	yes
PCSK6	21:29500831-29674135	BVDV	CTRL	OK	1.67591	0.915923	-0.871644	0.00580788	yes
METRNL	19:50243526-50258688	BVDV	CTRL	OK	21.4077	11.7089	-0.870528	0.000603881	yes
FAM65C	13:79329172-79355653	BVDV	CTRL	OK	1.34738	0.737003	-0.870418	0.0266527	yes
ME3	29:8947351-9168579	BVDV	CTRL	OK	1.36563	0.747346	-0.869717	0.0467214	yes
LAMB2	22:51456199-51470445	BVDV	CTRL	OK	12.2116	6.68371	-0.86953	0.000603881	yes
NDN	21:736182-737792	BVDV	CTRL	OK	3.87297	2.12104	-0.868665	0.0112595	yes
PVRL2	18:52984222-53007899	BVDV	CTRL	OK	35.7972	19.6277	-0.866957	0.000603881	yes
LOC100848913	8:99783969-99804459	BVDV	CTRL	OK	131.476	72.1272	-0.866186	0.000603881	yes
SLIT3	20:324336-1051861	BVDV	CTRL	OK	2.94085	1.61395	-0.865637	0.000603881	yes
KCNIP3	11:2079468-2098024	BVDV	CTRL	OK	3.80636	2.0892	-0.865463	0.0245216	yes
VCAM1	3:42743607-42766060	BVDV	CTRL	OK	27.3708	15.027	-0.865079	0.000603881	yes
LOC614522	3:48451879-48493897	BVDV	CTRL	OK	10.5993	5.82244	-0.864275	0.0128102	yes
LTBR	5:104346659-104354420	BVDV	CTRL	OK	20.7143	11.3861	-0.863354	0.000603881	yes
PTPRM	24:40768695-41437426	BVDV	CTRL	OK	8.74453	4.80737	-0.863133	0.000603881	yes
LEPREL1	1:77752545-77932254	BVDV	CTRL	OK	4.56833	2.51361	-0.861908	0.000603881	yes
FHL1	X:19777798-19821369	BVDV	CTRL	OK	34.7725	19.148	-0.860754	0.000603881	yes
CD34	16:77367521-77390475	BVDV	CTRL	OK	19.6024	10.8006	-0.859915	0.000603881	yes
FAM107A	22:43354326-43359048	BVDV	CTRL	OK	3.45337	1.90303	-0.85971	0.00521093	yes
GEM	14:72386750-72399661	BVDV	CTRL	OK	7.32555	4.0399	-0.858619	0.000603881	yes
EMCN	6:25578633-25700218	BVDV	CTRL	OK	13.317	7.34657	-0.858124	0.000603881	yes
CMTM8	22:6789384-6885301	BVDV	CTRL	OK	6.01318	3.32039	-0.856777	0.025589	yes
PDLIM1	26:16605967-16646598	BVDV	CTRL	OK	22.2994	12.3194	-0.856077	0.000603881	yes
ARAP3	7:54376461-54466465	BVDV	CTRL	OK	8.07785	4.46319	-0.855896	0.0169612	yes
PLOD1	16:42594655-42625798	BVDV	CTRL	OK	18.7668	10.3703	-0.855729	0.000603881	yes
SH3RF1	8:1173008-1175051	BVDV	CTRL	OK	1.94651	1.07669	-0.854294	0.00488964	yes
SIGLEC12	18:57588070-57594365	BVDV	CTRL	OK	7.12902	3.94367	-0.854163	0.000603881	yes
LAMB1	4:49263404-49340000	BVDV	CTRL	OK	12.7711	7.06552	-0.854015	0.000603881	yes
SGSM1	17:67284514-67335715	BVDV	CTRL	OK	1.77551	0.982959	-0.853034	0.00417128	yes
RGN	X:90732501-90747294	BVDV	CTRL	OK	2.00789	1.11161	-0.853031	0.0476507	yes
SNCA	6:36284033-36432430	BVDV	CTRL	OK	5.58855	3.09496	-0.852551	0.0148201	yes
SMAD1	17:12906375-12953417	BVDV	CTRL	OK	14.2149	7.87306	-0.852411	0.000603881	yes
MMP15	18:26021949-26043124	BVDV	CTRL	OK	1.92496	1.06694	-0.851354	0.0078671	yes
FKBP9	4:64209774-64252100	BVDV	CTRL	OK	8.61225	4.77385	-0.851238	0.000603881	yes
LOC535166	14:35399030-35568877	BVDV	CTRL	OK	0.930067	0.516066	-0.849779	0.0352211	yes
GJA4	3:111481701-111483760	BVDV	CTRL	OK	38.0921	21.1385	-0.849618	0.000603881	yes
GFRA2	8:69500576-69604707	BVDV	CTRL	OK	4.00317	2.22609	-0.846631	0.00417128	yes
ISYNA1	7:4669452-4672649	BVDV	CTRL	OK	6.54126	3.63872	-0.84614	0.00110321	yes
ZNF277	4:55994118-56128665	BVDV	CTRL	OK	29.6738	16.5173	-0.845217	0.000603881	yes
EVC2	6:105448808-105451674	BVDV	CTRL	OK	0.983884	0.548332	-0.843439	0.0395675	yes
C1QA	2:130792854-130795743	BVDV	CTRL	OK	1668.56	930.49	-0.842537	0.000603881	yes
PECAM1	19:49175890-49238414	BVDV	CTRL	OK	34.6497	19.3287	-0.842096	0.000603881	yes
PLEKHG5	16:47719087-47751042	BVDV	CTRL	OK	14.6116	8.15904	-0.840648	0.000603881	yes
RBFOX3	19:53623086-53953047	BVDV	CTRL	OK	1.4614	0.816088	-0.840557	0.0385873	yes
CX3CL1	18:25464313-25476367	BVDV	CTRL	OK	2.62238	1.46592	-0.839077	0.00278749	yes
ENTPD2	11:106183597-106189097	BVDV	CTRL	OK	7.17812	4.01294	-0.838946	0.00155501	yes
ANGPT4	13:60729757-60773779	BVDV	CTRL	OK	4.30351	2.40922	-0.836948	0.00110321	yes
LAYN	15:22174768-22198288	BVDV	CTRL	OK	12.3022	6.90009	-0.834223	0.000603881	yes
C1QB	2:130769169-130775911	BVDV	CTRL	OK	1336.89	749.94	-0.834028	0.000603881	yes
DLL4	10:36577284-36586360	BVDV	CTRL	OK	5.54501	3.11066	-0.833968	0.000603881	yes
LOC505709	19:40722059-40746517	BVDV	CTRL	OK	14.2702	8.0079	-0.833514	0.000603881	yes
SMYD2	16:70760232-70824127	BVDV	CTRL	OK	22.1138	12.4224	-0.832011	0.00932137	yes
SCARA3	8:10991169-11010152	BVDV	CTRL	OK	7.0504	3.96183	-0.83154	0.000603881	yes
CD151	29:50695516-50700467	BVDV	CTRL	OK	85.9019	48.2745	-0.831431	0.000603881	yes
GSTM3	3:33768049-33770824	BVDV	CTRL	OK	10.2876	5.78408	-0.830747	0.00932137	yes
CRTAP	22:7532376-7565773	BVDV	CTRL	OK	13.6312	7.66472	-0.830604	0.000603881	yes
SORBS3	8:70357692-70384760	BVDV	CTRL	OK	26.1693	14.7149	-0.830595	0.000603881	yes
BMX	X:135201307-135238777	BVDV	CTRL	OK	5.36132	3.01785	-0.829065	0.000603881	yes
GATA6	24:34548446-34578369	BVDV	CTRL	OK	8.0207	4.51723	-0.82829	0.000603881	yes
P4HA2	7:23480314-23513318	BVDV	CTRL	OK	13.1761	7.42145	-0.828148	0.000603881	yes
MMP23B	16:52260740-52263073	BVDV	CTRL	OK	3.91657	2.20724	-0.827348	0.0296175	yes
STAB1	22:48847391-48909562	BVDV	CTRL	OK	28.833	16.2573	-0.826628	0.000603881	yes
PKDCC	11:24530180-24540033	BVDV	CTRL	OK	46.4978	26.219	-0.826548	0.000603881	yes
C22H3orf54	22:51001138-51002896	BVDV	CTRL	OK	11.5665	6.52679	-0.825506	0.00239673	yes
TMEM132A	29:37842837-37856697	BVDV	CTRL	OK	7.99431	4.51151	-0.825362	0.000603881	yes
S100B	1:148001995-148016981	BVDV	CTRL	OK	6.85712	3.86984	-0.825328	0.00314915	yes
LOC785141	16:63526330-63568964	BVDV	CTRL	OK	0.803557	0.453508	-0.825273	0.0355951	yes
LOC511353	17:72815146-72817914	BVDV	CTRL	OK	143.794	81.1804	-0.824797	0.000603881	yes
FCGRT	18:56415699-56421855	BVDV	CTRL	OK	248.809	140.539	-0.824065	0.000603881	yes
FOS	10:86883738-86887170	BVDV	CTRL	OK	23.7912	13.4392	-0.823974	0.000603881	yes
CD5L	3:12546983-12564826	BVDV	CTRL	OK	497.439	281.031	-0.823794	0.000603881	yes
CLEC4E	5:102158364-102168685	BVDV	CTRL	OK	4.2988	2.43028	-0.822809	0.0249332	yes
PDE1A	2:14175609-14483437	BVDV	CTRL	OK	0.874841	0.494757	-0.822302	0.0385873	yes
NFATC4	10:20632350-20642260	BVDV	CTRL	OK	3.17624	1.79807	-0.820869	0.000603881	yes
SERPINB8	24:12678975-12716024	BVDV	CTRL	OK	6.29126	3.56227	-0.820553	0.00386315	yes
ANKRD24	7:21041698-21075660	BVDV	CTRL	OK	2.36307	1.33816	-0.820414	0.00453214	yes
ST6GALNAC6	11:98567330-98580373	BVDV	CTRL	OK	12.6617	7.17189	-0.820051	0.000603881	yes
TP53I13	19:21385385-21389755	BVDV	CTRL	OK	16.2971	9.23405	-0.819581	0.000603881	yes
TRPM4	18:56114585-56157444	BVDV	CTRL	OK	3.87099	2.1955	-0.818155	0.00110321	yes
SH3D21	3:110121045-110134882	BVDV	CTRL	OK	1.38878	0.788245	-0.817102	0.0452121	yes
LOC100847763	3:15521492-15528093	BVDV	CTRL	OK	21.42	12.1732	-0.815242	0.00155501	yes
TRIM47	19:56373298-56377735	BVDV	CTRL	OK	13.2382	7.52821	-0.814333	0.000603881	yes
TBXAS1	4:104133818-104307006	BVDV	CTRL	OK	13.5974	7.73668	-0.81354	0.000603881	yes
SH3D19	17:6636916-6686445	BVDV	CTRL	OK	5.52041	3.143	-0.812633	0.000603881	yes
C1QTNF1	19:53978215-53984772	BVDV	CTRL	OK	7.67386	4.37108	-0.811965	0.000603881	yes
NECAB2	18:10316498-10350464	BVDV	CTRL	OK	3.13502	1.78635	-0.811457	0.0385873	yes
EFNA1	3:15521492-15528093	BVDV	CTRL	OK	11.0736	6.31043	-0.811311	0.00110321	yes
LOC100337485	17:74837575-74841534	BVDV	CTRL	OK	4.61005	2.62783	-0.810912	0.026859	yes
BMP1	8:69980324-70028294	BVDV	CTRL	OK	6.16342	3.51459	-0.810374	0.000603881	yes
HOXB3	19:38572742-38576915	BVDV	CTRL	OK	3.45813	1.97202	-0.810315	0.00350101	yes
LMNA	3:14697381-14715262	BVDV	CTRL	OK	17.1202	9.76916	-0.809395	0.000603881	yes
CD109	9:13421248-13551862	BVDV	CTRL	OK	0.755398	0.431093	-0.809238	0.0296175	yes
ATOH8	11:48954368-48996567	BVDV	CTRL	OK	7.27214	4.15117	-0.808863	0.000603881	yes
ACVRL1	5:28097835-28106733	BVDV	CTRL	OK	30.4074	17.3703	-0.807798	0.000603881	yes
LOC100337213	7:10817301-10830303	BVDV	CTRL	OK	4.34236	2.48276	-0.806536	0.0437381	yes
LOC511937	14:43743183-43744285	BVDV	CTRL	OK	16.8464	9.63333	-0.806336	0.000603881	yes
KIAA1199	21:27232611-27297774	BVDV	CTRL	OK	6.15304	3.52425	-0.803982	0.000603881	yes
EFNA5	7:109046034-109097543	BVDV	CTRL	OK	0.92463	0.530223	-0.802277	0.0367991	yes
CHCHD6	22:60960187-61060022	BVDV	CTRL	OK	10.9497	6.28217	-0.801554	0.0078671	yes
SMTN	17:72028545-72064314	BVDV	CTRL	OK	10.5348	6.04621	-0.801055	0.000603881	yes
SLC45A3	16:3243333-3250256	BVDV	CTRL	OK	3.05837	1.75597	-0.800499	0.00551311	yes
MCAM	15:30413026-30422213	BVDV	CTRL	OK	8.61107	4.94541	-0.8001	0.0160094	yes
SDC2	14:69930850-70050653	BVDV	CTRL	OK	9.00736	5.17312	-0.800071	0.00278749	yes
CHST7	X:90149332-90360908	BVDV	CTRL	OK	7.14049	4.10184	-0.79975	0.029194	yes
CSF1R	7:63379475-63410973	BVDV	CTRL	OK	140.56	80.8137	-0.79852	0.000603881	yes
SLC43A1	15:82050594-82081172	BVDV	CTRL	OK	7.63168	4.39181	-0.797186	0.00110321	yes
C26H10orf92	26:51041470-51109492	BVDV	CTRL	OK	0.847244	0.488131	-0.795509	0.0172033	yes
LOC781493	14:83892852-84110477	BVDV	CTRL	OK	6.25667	3.61061	-0.793153	0.000603881	yes
LOC789485	7:8930802-8971372	BVDV	CTRL	OK	6.29231	3.63123	-0.79313	0.000603881	yes
CXHXorf36	X:103969314-104013030	BVDV	CTRL	OK	1.75224	1.01124	-0.79308	0.0217397	yes
OLFM2	7:15549856-15556930	BVDV	CTRL	OK	2.63119	1.51855	-0.793022	0.0339014	yes
CMBL	20:63065547-63090743	BVDV	CTRL	OK	9.14827	5.28114	-0.79265	0.00110321	yes
ZNF219	10:26054162-26057366	BVDV	CTRL	OK	5.96628	3.44667	-0.791629	0.000603881	yes
VOPP1	22:495505-677104	BVDV	CTRL	OK	9.86754	5.70077	-0.791535	0.000603881	yes
MYO7A	15:57329071-57526489	BVDV	CTRL	OK	1.74898	1.01142	-0.790136	0.00110321	yes
SLC40A1	2:6716590-6740329	BVDV	CTRL	OK	130.41	75.4934	-0.788632	0.000603881	yes
ITGA9	22:10946190-11307086	BVDV	CTRL	OK	5.01911	2.90569	-0.788549	0.000603881	yes
COL6A1	1:147404395-147423644	BVDV	CTRL	OK	41.6052	24.0866	-0.788533	0.000603881	yes
RARRES2	4:113564405-113567492	BVDV	CTRL	OK	191.272	110.741	-0.788435	0.000603881	yes
PEPD	18:44018756-44137225	BVDV	CTRL	OK	104.9	60.7356	-0.788403	0.000603881	yes
LZTS2	26:21703369-21710510	BVDV	CTRL	OK	21.0463	12.1887	-0.788025	0.000603881	yes
LOC100847382	11:73724473-73936284	BVDV	CTRL	OK	40.05	23.2193	-0.78648	0.00350101	yes
JAM3	29:33546269-33577319	BVDV	CTRL	OK	6.14849	3.56481	-0.786408	0.000603881	yes
MDFI	23:15465649-15482678	BVDV	CTRL	OK	11.2702	6.54214	-0.784678	0.000603881	yes
SEPP1	20:31784033-31793708	BVDV	CTRL	OK	614.799	356.88	-0.784676	0.00155501	yes
BST1	6:115687861-115716694	BVDV	CTRL	OK	5.10204	2.96221	-0.784399	0.0307873	yes
CRELD2	5:120933368-120940337	BVDV	CTRL	OK	65.188	37.8634	-0.783804	0.000603881	yes
MEIS2	10:32643641-32868269	BVDV	CTRL	OK	5.15581	2.9947	-0.783788	0.000603881	yes
PTGFRN	3:26366818-26438341	BVDV	CTRL	OK	5.67642	3.29854	-0.783153	0.000603881	yes
TCEA2	13:54276803-54284507	BVDV	CTRL	OK	8.62884	5.01449	-0.783063	0.00872462	yes
SOX13	16:1716802-1728821	BVDV	CTRL	OK	4.6019	2.67481	-0.782795	0.00278749	yes
LARP6	10:17662467-17669433	BVDV	CTRL	OK	2.04446	1.18916	-0.781779	0.0476507	yes
NAAA	6:92508026-92544085	BVDV	CTRL	OK	119.67	69.6133	-0.781629	0.000603881	yes
PLA2G2D1	2:133176654-133189041	BVDV	CTRL	OK	177.851	103.488	-0.781211	0.000603881	yes
PPARG	22:57275516-57489590	BVDV	CTRL	OK	7.33278	4.26731	-0.781034	0.0078671	yes
CHGA	21:58163027-58176319	BVDV	CTRL	OK	2.94429	1.71408	-0.780487	0.0215097	yes
LARGE	5:72156270-72614194	BVDV	CTRL	OK	3.04956	1.77546	-0.780411	0.00197898	yes
STAC2	19:40340953-40352870	BVDV	CTRL	OK	5.50319	3.20502	-0.779934	0.0123084	yes
NRP1	13:19911856-20059590	BVDV	CTRL	OK	22.073	12.8568	-0.779753	0.000603881	yes
LOC100848673	11:87505384-87522319	BVDV	CTRL	OK	3.36399	1.96051	-0.778943	0.00733648	yes
ANKRD55	20:23007390-23117580	BVDV	CTRL	OK	2.06619	1.20453	-0.778495	0.0309565	yes
MYH14	18:56871092-56948271	BVDV	CTRL	OK	0.642509	0.374724	-0.777889	0.0377438	yes
SAMD14	19:37159423-37176240	BVDV	CTRL	OK	4.89899	2.8573	-0.777831	0.00488964	yes
NDRG4	18:26369829-26383765	BVDV	CTRL	OK	1.60865	0.939165	-0.776403	0.0231922	yes
PHLDB2	1:57054878-57145886	BVDV	CTRL	OK	5.21619	3.04855	-0.774874	0.000603881	yes
PDGFB	5:111180166-111200490	BVDV	CTRL	OK	14.1887	8.29352	-0.774689	0.000603881	yes
CXCR6	22:53951003-54026346	BVDV	CTRL	OK	30.3921	17.7653	-0.774633	0.00488964	yes
FBLIM1	16:53027477-53049143	BVDV	CTRL	OK	8.79403	5.14055	-0.774603	0.000603881	yes
HLA-DQA1	23:25404613-25411631	BVDV	CTRL	OK	308.64	180.421	-0.774558	0.000603881	yes
TUBB4A	7:19206049-19212081	BVDV	CTRL	OK	13.2026	7.72245	-0.773695	0.000603881	yes
VLDLR	8:42109678-42141155	BVDV	CTRL	OK	4.50468	2.63533	-0.773444	0.00110321	yes
COLEC12	24:35630927-35816269	BVDV	CTRL	OK	12.5692	7.35642	-0.772816	0.000603881	yes
MRVI1	15:42548307-42674631	BVDV	CTRL	OK	3.38852	1.98411	-0.772161	0.000603881	yes
LOC100337023	11:106854042-106879019	BVDV	CTRL	OK	7.42258	4.34689	-0.771936	0.000603881	yes
LOC100141258	25:2515681-2521344	BVDV	CTRL	OK	59.417	34.806	-0.771539	0.000603881	yes
ABP1	4:114249781-114262315	BVDV	CTRL	OK	70.6706	41.4027	-0.771387	0.000603881	yes
C27H8orf4	27:34893818-34895120	BVDV	CTRL	OK	27.7886	16.2824	-0.77118	0.000603881	yes
SIGLEC1	13:51945278-51962382	BVDV	CTRL	OK	79.9564	46.8589	-0.770891	0.000603881	yes
DSTN	13:38259751-38284536	BVDV	CTRL	OK	54.2993	31.8349	-0.770326	0.000603881	yes
TP53BP2	16:27841400-27881990	BVDV	CTRL	OK	2.53006	1.48343	-0.770235	0.00350101	yes
NPNT	6:20449801-20529959	BVDV	CTRL	OK	2.95746	1.73419	-0.770093	0.000603881	yes
C11H9orf116	11:106451396-106455938	BVDV	CTRL	OK	15.9987	9.3847	-0.76957	0.00703952	yes
ARHGEF25	5:56205532-56212752	BVDV	CTRL	OK	4.83468	2.83606	-0.769532	0.00314915	yes
TMEM141	11:106375056-106376837	BVDV	CTRL	OK	13.6232	7.9938	-0.769107	0.00673997	yes
DPEP2	18:35583498-35587974	BVDV	CTRL	OK	8.58324	5.03734	-0.768861	0.00278749	yes
HEBP1	5:97348104-97385494	BVDV	CTRL	OK	35.1071	20.6413	-0.766229	0.000603881	yes
PTPRR	5:42837596-43112732	BVDV	CTRL	OK	1.1473	0.674581	-0.766186	0.046566	yes
MAOB	X:105235854-105359155	BVDV	CTRL	OK	1.79901	1.0597	-0.763548	0.0329287	yes
CHPF	2:108191927-108197357	BVDV	CTRL	OK	25.3976	14.9635	-0.763251	0.000603881	yes
LOC520692	18:56681332-56693431	BVDV	CTRL	OK	20.8238	12.2723	-0.76283	0.0120531	yes
NUPR1	25:26340077-26341408	BVDV	CTRL	OK	101.065	59.562	-0.762816	0.000603881	yes
SPHK1	19:55978696-55981889	BVDV	CTRL	OK	34.8006	20.5101	-0.762774	0.000603881	yes
RAB34	19:20698088-20702173	BVDV	CTRL	OK	9.45986	5.57749	-0.762202	0.00155501	yes
ADAMTS4	3:8322535-8330396	BVDV	CTRL	OK	1.5689	0.92612	-0.760486	0.0270934	yes
SNCAIP	7:32714460-32792177	BVDV	CTRL	OK	3.05086	1.80193	-0.759671	0.00197898	yes
NUDT8	29:46123750-46126289	BVDV	CTRL	OK	15.2329	8.99981	-0.759222	0.00551311	yes
SMARCD3	4:114615442-114641250	BVDV	CTRL	OK	12.9485	7.65819	-0.757707	0.00155501	yes
ITGA3	19:37198628-37231287	BVDV	CTRL	OK	4.80798	2.84477	-0.757117	0.000603881	yes
PKIG	13:73669766-73749988	BVDV	CTRL	OK	63.2993	37.4801	-0.756066	0.000603881	yes
S100A16	3:16830510-16837422	BVDV	CTRL	OK	29.8129	17.6575	-0.755658	0.000603881	yes
FILIP1	9:15140840-15249645	BVDV	CTRL	OK	1.87773	1.11235	-0.755373	0.00386315	yes
SNX24	7:32140922-32313012	BVDV	CTRL	OK	16.4153	9.7324	-0.754176	0.000603881	yes
LOC525938	29:46054135-46057330	BVDV	CTRL	OK	40.2827	23.8955	-0.753422	0.000603881	yes
CYP2D14	5:113621615-113625791	BVDV	CTRL	OK	4.66605	2.76802	-0.753348	0.0162451	yes
DOK3	7:40362231-40367515	BVDV	CTRL	OK	19.6393	11.657	-0.752553	0.000603881	yes
LOC100337216	12:74293958-74375569	BVDV	CTRL	OK	6.95105	4.1321	-0.750356	0.00314915	yes
HHIPL1	21:66284692-66315180	BVDV	CTRL	OK	2.10936	1.25418	-0.750066	0.0199155	yes
NEURL1B	20:4315561-4357487	BVDV	CTRL	OK	2.16645	1.28944	-0.748583	0.0187455	yes
ID1	13:61726124-61727284	BVDV	CTRL	OK	21.6106	12.8672	-0.748045	0.000603881	yes
DOCK6	7:16851746-16898876	BVDV	CTRL	OK	6.08682	3.62447	-0.74792	0.000603881	yes
FAM108C1	21:27054891-27108983	BVDV	CTRL	OK	4.74182	2.82487	-0.747257	0.00386315	yes
FXYD6	15:28926758-28963808	BVDV	CTRL	OK	57.15	34.0474	-0.747211	0.000603881	yes
GOLM1	8:80641484-80687987	BVDV	CTRL	OK	9.14616	5.44907	-0.747158	0.00278749	yes
LOC510860	16:4939774-4950979	BVDV	CTRL	OK	174.64	104.087	-0.746592	0.000603881	yes
LYVE1	15:42678183-42692474	BVDV	CTRL	OK	52.4851	31.2887	-0.746268	0.000603881	yes
SULT1A1	25:26381341-26383747	BVDV	CTRL	OK	92.9166	55.3918	-0.746264	0.000603881	yes
LOC504773	19:14735717-14741999	BVDV	CTRL	OK	1211.86	722.945	-0.745268	0.000603881	yes
HCFC1R1	25:2442004-2443352	BVDV	CTRL	OK	21.8421	13.0309	-0.745172	0.00521093	yes
LOC513496	10:36068086-36074651	BVDV	CTRL	OK	2.87956	1.71838	-0.7448	0.0169612	yes
COL6A2	1:147542824-147570738	BVDV	CTRL	OK	20.1668	12.0357	-0.744667	0.000603881	yes
SEMA6A	7:38732389-38795857	BVDV	CTRL	OK	2.53104	1.51102	-0.744213	0.00521093	yes
PTGES	11:100143652-100155090	BVDV	CTRL	OK	23.7381	14.1774	-0.743615	0.000603881	yes
PEAR1	3:13986474-14007210	BVDV	CTRL	OK	14.7291	8.79783	-0.743453	0.000603881	yes
SCARA5	8:10662267-10796380	BVDV	CTRL	OK	28.627	17.1161	-0.742027	0.000603881	yes
HYAL2	22:50592323-50597462	BVDV	CTRL	OK	22.9066	13.7036	-0.741211	0.000603881	yes
CD68	19:27921926-27923983	BVDV	CTRL	OK	202.732	121.288	-0.741132	0.000603881	yes
MEG3	21:67377726-67395997	BVDV	CTRL	OK	2.56062	1.53341	-0.739747	0.030028	yes
ENTPD8	11:105698113-105711512	BVDV	CTRL	OK	21.9164	13.1254	-0.73965	0.000603881	yes
LDB2	6:116533067-116999127	BVDV	CTRL	OK	13.9798	8.37368	-0.739414	0.000603881	yes
CFD	7:45030309-45032846	BVDV	CTRL	OK	277.758	166.407	-0.73911	0.000603881	yes
LGMN	21:57965315-58004541	BVDV	CTRL	OK	244.136	146.286	-0.738891	0.000603881	yes
ROR2	8:87340387-87578642	BVDV	CTRL	OK	1.24756	0.748179	-0.737649	0.0336991	yes
TBX3	17:62351359-62365247	BVDV	CTRL	OK	0.938633	0.562953	-0.737548	0.0378989	yes
UROC1	22:61133626-61161321	BVDV	CTRL	OK	3.86155	2.31662	-0.737154	0.00314915	yes
PCGF2	19:39964764-39969793	BVDV	CTRL	OK	6.66127	3.99677	-0.736963	0.00110321	yes
ICA1	4:17177734-17341262	BVDV	CTRL	OK	6.97098	4.18401	-0.736473	0.00350101	yes
LAPTM4B	14:68668783-68730663	BVDV	CTRL	OK	41.1464	24.6972	-0.736419	0.000603881	yes
SLC22A17	10:21409115-21414764	BVDV	CTRL	OK	11.3216	6.79779	-0.735942	0.000603881	yes
PDCD1	3:121284543-121294475	BVDV	CTRL	OK	47.1456	28.3094	-0.735841	0.000603881	yes
CLEC4F	11:13584913-13596922	BVDV	CTRL	OK	125.249	75.2292	-0.735434	0.000603881	yes
SEL1L3	6:46790206-46881531	BVDV	CTRL	OK	2.48715	1.49401	-0.735304	0.00314915	yes
CERS4	7:18128318-18163612	BVDV	CTRL	OK	29.2744	17.5919	-0.734729	0.000603881	yes
LOC100848920	16:13041891-13045226	BVDV	CTRL	OK	15.0756	9.0595	-0.734713	0.000603881	yes
PPP1R3C	26:13270021-13274922	BVDV	CTRL	OK	2.60816	1.56801	-0.734098	0.0152528	yes
TTYH2	19:57793546-57829254	BVDV	CTRL	OK	9.52179	5.72552	-0.733826	0.000603881	yes
GPR84	5:25825585-25827510	BVDV	CTRL	OK	3.42738	2.06132	-0.733533	0.0408018	yes
CAPN5	15:57256222-57313832	BVDV	CTRL	OK	6.12315	3.68296	-0.733408	0.000603881	yes
IFT27	5:75509445-75532844	BVDV	CTRL	OK	8.89245	5.34959	-0.733154	0.0164989	yes
ELN	25:33788121-33820666	BVDV	CTRL	OK	18.3857	11.0626	-0.732887	0.000603881	yes
DDAH2	23:27399305-27402826	BVDV	CTRL	OK	23.3166	14.0318	-0.732652	0.000603881	yes
LOC614141	19:57524814-57534165	BVDV	CTRL	OK	24.8433	14.957	-0.732035	0.000603881	yes
THBD	13:42217370-42221004	BVDV	CTRL	OK	14.9866	9.03319	-0.730369	0.000603881	yes
NR1D1	19:41017270-41048228	BVDV	CTRL	OK	6.89901	4.16055	-0.729615	0.0201535	yes
ECSCR	7:52346077-52354164	BVDV	CTRL	OK	31.7854	19.173	-0.729289	0.000603881	yes
FHL3	3:108547856-108555477	BVDV	CTRL	OK	7.41953	4.47644	-0.728976	0.00417128	yes
CAPN2	16:27781670-27840011	BVDV	CTRL	OK	29.8446	18.0086	-0.728783	0.000603881	yes
OPLAH	14:1957553-1968789	BVDV	CTRL	OK	2.86249	1.72805	-0.728129	0.0409202	yes
LOC505941	13:38289289-38317485	BVDV	CTRL	OK	54.3639	32.8395	-0.727216	0.000603881	yes
GRN	19:44775156-44782140	BVDV	CTRL	OK	396.555	239.553	-0.727172	0.000603881	yes
VSTM1	18:62145369-62165477	BVDV	CTRL	OK	4.89185	2.95594	-0.726761	0.0192173	yes
LOC504694	21:30840506-30897314	BVDV	CTRL	OK	2.73246	1.65203	-0.725964	0.00239673	yes
PARD6G	24:582651-659853	BVDV	CTRL	OK	3.38298	2.04591	-0.72555	0.00110321	yes
CORO1B	29:45974630-45980142	BVDV	CTRL	OK	114.597	69.3546	-0.724508	0.000603881	yes
PCDHGC3	7:54152474-54281947	BVDV	CTRL	OK	12.8705	7.78966	-0.724431	0.00110321	yes
LOC514257	4:99787243-99834624	BVDV	CTRL	OK	15.3937	9.31748	-0.724329	0.000603881	yes
FKBP10	19:42623025-42655993	BVDV	CTRL	OK	17.4894	10.5894	-0.723858	0.000603881	yes
VAT1	19:43687402-43694870	BVDV	CTRL	OK	74.4531	45.0836	-0.723728	0.000603881	yes
LOC100848012	23:37872870-37875499	BVDV	CTRL	OK	5.442	3.29628	-0.723296	0.00386315	yes
PARVB	5:115517820-115574009	BVDV	CTRL	OK	16.3972	9.93358	-0.723061	0.000603881	yes
NDRG2	10:26134160-26143085	BVDV	CTRL	OK	18.5025	11.2125	-0.72261	0.000603881	yes
S100A4	3:16886282-16888570	BVDV	CTRL	OK	108.24	65.5953	-0.722572	0.000603881	yes
TRIM7	7:41717640-41731782	BVDV	CTRL	OK	3.49445	2.11812	-0.722279	0.00703952	yes
KLF4	8:98843682-98847740	BVDV	CTRL	OK	6.49152	3.93553	-0.721999	0.00110321	yes
SLC16A5	19:56975493-56985227	BVDV	CTRL	OK	4.6541	2.8217	-0.721937	0.00733648	yes
RGS5	3:6228348-6426532	BVDV	CTRL	OK	11.5726	7.01825	-0.721532	0.000603881	yes
FZD8	13:27056506-27058756	BVDV	CTRL	OK	7.51573	4.56321	-0.719866	0.00612767	yes
LHFP	12:22817677-23026892	BVDV	CTRL	OK	4.50324	2.73438	-0.719749	0.0249332	yes
LOC539231	18:25804401-25834796	BVDV	CTRL	OK	6.27705	3.81622	-0.717942	0.00110321	yes
LOC100848730	13:22021803-22033043	BVDV	CTRL	OK	8.57465	5.22202	-0.71547	0.000603881	yes
APLP1	18:46754201-46764959	BVDV	CTRL	OK	8.25282	5.0289	-0.714645	0.000603881	yes
PLCD1	22:11497066-11518465	BVDV	CTRL	OK	13.1408	8.00828	-0.714487	0.000603881	yes
GLB1	22:7413787-7517596	BVDV	CTRL	OK	28.635	17.4559	-0.714062	0.000603881	yes
TMEM8B	8:60427216-60439343	BVDV	CTRL	OK	4.80836	2.93462	-0.71237	0.00872462	yes
LOC100847285	22:61060316-61113414	BVDV	CTRL	OK	5.53545	3.37866	-0.712249	0.00239673	yes
IGFBP5	2:105378989-105397646	BVDV	CTRL	OK	6.92554	4.23051	-0.711094	0.0332928	yes
GPR116	23:20052362-20128180	BVDV	CTRL	OK	6.72415	4.10757	-0.711068	0.000603881	yes
SH3RF3	11:44205802-44365502	BVDV	CTRL	OK	1.76385	1.07839	-0.709848	0.0317318	yes
RAMP1	3:117913715-117955248	BVDV	CTRL	OK	34.1129	20.8659	-0.709167	0.000603881	yes
RABAC1	18:51607793-51610671	BVDV	CTRL	OK	182.52	111.648	-0.7091	0.000603881	yes
F11R	3:8483557-8508123	BVDV	CTRL	OK	25.4489	15.5704	-0.708799	0.000603881	yes
HRH1	22:55885709-55932848	BVDV	CTRL	OK	1.945	1.1907	-0.707966	0.0242875	yes
AVPI1	26:18711830-18719926	BVDV	CTRL	OK	5.81756	3.56248	-0.70753	0.020634	yes
CYYR1	1:9242707-9360374	BVDV	CTRL	OK	5.4787	3.35576	-0.707194	0.00386315	yes
MEIS3	18:54825680-54836604	BVDV	CTRL	OK	6.36217	3.89965	-0.706175	0.0104295	yes
NUAK2	16:2894908-2914079	BVDV	CTRL	OK	9.72997	5.97132	-0.704386	0.0101625	yes
MAN1C1	2:127888234-128008111	BVDV	CTRL	OK	21.4817	13.1843	-0.704281	0.000603881	yes
GADD45G	8:90017445-90018996	BVDV	CTRL	OK	5.20271	3.19345	-0.704147	0.0471171	yes
MAPRE3	11:72598139-72653468	BVDV	CTRL	OK	9.77707	6.00722	-0.702705	0.00155501	yes
MADCAM1	7:44773997-44778672	BVDV	CTRL	OK	9.13538	5.61459	-0.702285	0.00612767	yes
MAP1LC3A	13:64497253-64498905	BVDV	CTRL	OK	99.2079	60.9844	-0.702014	0.000603881	yes
IGFBP3	4:76705104-76713511	BVDV	CTRL	OK	415.626	255.579	-0.701515	0.000603881	yes
CARD9	11:103876013-103883072	BVDV	CTRL	OK	38.8366	23.8876	-0.701152	0.000603881	yes
GRB10	4:5104898-5244384	BVDV	CTRL	OK	8.11903	4.99572	-0.700615	0.000603881	yes
RNASET2	9:103275247-103292937	BVDV	CTRL	OK	95.3471	58.6713	-0.700534	0.000603881	yes
CTSB	8:7414944-7423429	BVDV	CTRL	OK	351.485	216.492	-0.699152	0.000603881	yes
TSPO	5:114596005-114608640	BVDV	CTRL	OK	164.619	101.42	-0.698785	0.000603881	yes
RFTN2	2:86505715-86581573	BVDV	CTRL	OK	4.40189	2.71282	-0.698333	0.0176268	yes
PRDX4	X:126551743-126564689	BVDV	CTRL	OK	110.283	68.0075	-0.697442	0.000603881	yes
PPIC	7:32114444-32128247	BVDV	CTRL	OK	14.6342	9.0265	-0.697101	0.000603881	yes
POSTN	12:24241936-24276489	BVDV	CTRL	OK	6.03429	3.72294	-0.696742	0.00155501	yes
GPX8	20:23975636-23980445	BVDV	CTRL	OK	7.08986	4.37478	-0.696548	0.0167377	yes
PTK7	23:16677834-16740809	BVDV	CTRL	OK	1.24492	0.768812	-0.695346	0.0452121	yes
TOR2A	11:98409545-98429110	BVDV	CTRL	OK	17.1555	10.5973	-0.694978	0.000603881	yes
SIX5	18:53754943-53759029	BVDV	CTRL	OK	3.87234	2.39202	-0.694975	0.0125717	yes
GPT2	18:15370926-15405215	BVDV	CTRL	OK	7.64195	4.72415	-0.693887	0.00155501	yes
SLC22A23	23:50234184-50323826	BVDV	CTRL	OK	9.2409	5.7137	-0.693608	0.00580788	yes
CDC42EP2	29:44189277-44195091	BVDV	CTRL	OK	4.81589	2.97809	-0.693417	0.030404	yes
OSGIN1	18:10294994-10305620	BVDV	CTRL	OK	3.72525	2.30452	-0.692872	0.0463673	yes
TSHZ2	13:81600996-81604203	BVDV	CTRL	OK	1.84186	1.13966	-0.692566	0.0285888	yes
SFXN3	26:21731745-21738757	BVDV	CTRL	OK	6.32245	3.91269	-0.692322	0.00197898	yes
LOC506470	13:52885281-52942347	BVDV	CTRL	OK	5.13377	3.1776	-0.692083	0.00386315	yes
SPNS2	19:25598324-25633857	BVDV	CTRL	OK	7.66282	4.74595	-0.691179	0.00278749	yes
SCAMP5	21:34088421-34109601	BVDV	CTRL	OK	7.05249	4.3738	-0.689245	0.00110321	yes
LOC100337439	7:45554391-45579728	BVDV	CTRL	OK	6.26401	3.88601	-0.688794	0.00239673	yes
CD276	10:20323743-20355566	BVDV	CTRL	OK	5.94641	3.68978	-0.688484	0.00197898	yes
PAM	7:104321914-104501792	BVDV	CTRL	OK	17.6028	10.9276	-0.687832	0.000603881	yes
SLC7A7	10:21832583-21864021	BVDV	CTRL	OK	75.2695	46.7294	-0.687736	0.000603881	yes
PDGFRB	7:63496229-63532702	BVDV	CTRL	OK	17.9145	11.1267	-0.687105	0.000603881	yes
FBN1	10:61877807-62142171	BVDV	CTRL	OK	5.74324	3.57265	-0.684871	0.000603881	yes
LOC100847896	15:75852455-75884483	BVDV	CTRL	OK	26.5328	16.507	-0.684699	0.000603881	yes
PDIA5	1:68012077-68101852	BVDV	CTRL	OK	36.2084	22.527	-0.684667	0.000603881	yes
SNAI2	14:21577307-21580910	BVDV	CTRL	OK	11.5016	7.15578	-0.684657	0.00110321	yes
PIR	X:135257226-135366027	BVDV	CTRL	OK	11.1552	6.94441	-0.683788	0.00278749	yes
SHISA8	5:113418622-113420800	BVDV	CTRL	OK	9.64517	6.00467	-0.683723	0.0182757	yes
EPHA2	2:136525536-136552381	BVDV	CTRL	OK	11.8234	7.36351	-0.68318	0.000603881	yes
PDGFC	17:43205865-43459021	BVDV	CTRL	OK	37.9153	23.6189	-0.682835	0.000603881	yes
C16H1orf115	16:24876775-24889309	BVDV	CTRL	OK	19.9114	12.4097	-0.682125	0.000603881	yes
SORT1	3:34150753-34218238	BVDV	CTRL	OK	1.43697	0.896265	-0.681028	0.0078671	yes
MEOX1	19:44170622-44189299	BVDV	CTRL	OK	6.28031	3.91793	-0.680744	0.000603881	yes
NOD1	4:66275925-66312455	BVDV	CTRL	OK	5.56801	3.47421	-0.680478	0.000603881	yes
RHOC	3:30769965-30776473	BVDV	CTRL	OK	31.5777	19.7187	-0.67934	0.000603881	yes
PLOD2	1:123322466-123444003	BVDV	CTRL	OK	3.59073	2.24253	-0.679151	0.00239673	yes
DAB2	20:35018907-35079162	BVDV	CTRL	OK	28.0567	17.5357	-0.678055	0.000603881	yes
GRASP	5:28019960-28027764	BVDV	CTRL	OK	6.93764	4.33635	-0.677964	0.00580788	yes
LOC506831	14:2201268-2218827	BVDV	CTRL	OK	15.9036	9.94689	-0.677038	0.000603881	yes
NR2F2	21:10793102-10800183	BVDV	CTRL	OK	18.4993	11.5847	-0.675242	0.000603881	yes
L3MBTL1	13:72816396-72847320	BVDV	CTRL	OK	2.488	1.5581	-0.675203	0.0227642	yes
SLC6A12	5:107649323-107666752	BVDV	CTRL	OK	2.39283	1.49992	-0.673829	0.0281879	yes
CYR61	3:58678776-58681686	BVDV	CTRL	OK	17.5215	10.9881	-0.67319	0.000603881	yes
TPM2	8:60267450-60274815	BVDV	CTRL	OK	32.757	20.5435	-0.67312	0.000603881	yes
ASB9	X:135474902-135503510	BVDV	CTRL	OK	4.47488	2.80698	-0.672829	0.0251648	yes
MSR1	27:19976284-20056663	BVDV	CTRL	OK	39.343	24.6802	-0.672751	0.000603881	yes
ARMC5	25:27750895-27758488	BVDV	CTRL	OK	6.32514	3.96797	-0.672695	0.00278749	yes
CTSZ	13:57889706-57899206	BVDV	CTRL	OK	470.599	295.342	-0.672113	0.000603881	yes
LRP1	5:56561574-56641157	BVDV	CTRL	OK	9.2645	5.81639	-0.671589	0.000603881	yes
ANKH	20:58376938-58546813	BVDV	CTRL	OK	26.0569	16.3773	-0.669969	0.000603881	yes
PDIA4	4:112989510-113006466	BVDV	CTRL	OK	212.489	133.599	-0.669478	0.000603881	yes
ABCA10	19:61959545-62008975	BVDV	CTRL	OK	1.73599	1.09173	-0.669142	0.00814978	yes
LOC100848016	2:4150352-4151482	BVDV	CTRL	OK	25.1056	15.7893	-0.669059	0.00110321	yes
PID1	2:117836405-118104185	BVDV	CTRL	OK	5.35777	3.37074	-0.668565	0.00453214	yes
CTSK	3:19994997-20007861	BVDV	CTRL	OK	90.373	56.8902	-0.667711	0.000603881	yes
NR1H3	15:78323083-78330233	BVDV	CTRL	OK	100.162	63.0619	-0.667488	0.000603881	yes
MYH11	25:14189694-14343745	BVDV	CTRL	OK	13.3325	8.39466	-0.667403	0.0315337	yes
CDH15	18:14302695-14321679	BVDV	CTRL	OK	3.56635	2.24803	-0.665786	0.0152528	yes
TEAD3	23:9398809-9421655	BVDV	CTRL	OK	3.50022	2.20684	-0.665465	0.0143222	yes
AGTRAP	16:42806427-42825905	BVDV	CTRL	OK	61.2307	38.623	-0.664794	0.000603881	yes
DMBT1	26:42782329-42813475	BVDV	CTRL	OK	30.7703	19.4101	-0.66473	0.000603881	yes
MYO1D	19:17665143-18023500	BVDV	CTRL	OK	2.36956	1.49482	-0.664643	0.00417128	yes
LOC100848337	25:38342492-38343056	BVDV	CTRL	OK	19.1117	12.0587	-0.664379	0.029194	yes
IFT46	15:29732273-29746372	BVDV	CTRL	OK	4.39425	2.77385	-0.663727	0.0309565	yes
TUBB2A	23:50354842-50357632	BVDV	CTRL	OK	9.86195	6.22937	-0.662787	0.00703952	yes
GNA15	7:21907305-21926375	BVDV	CTRL	OK	29.5895	18.71	-0.661278	0.000603881	yes
TXNDC5	23:47305529-47349788	BVDV	CTRL	OK	372.087	235.279	-0.661268	0.000603881	yes
CACNA1S	16:81471373-81527896	BVDV	CTRL	OK	3.53359	2.23502	-0.660847	0.00197898	yes
METTL12	29:41693758-41695210	BVDV	CTRL	OK	27.4318	17.3528	-0.66068	0.00110321	yes
LOC537528	21:58680664-58924124	BVDV	CTRL	OK	0.706788	0.447184	-0.660407	0.0409202	yes
DBP	18:55722334-55729578	BVDV	CTRL	OK	26.8824	17.0099	-0.660282	0.000603881	yes
GPX1	22:51325105-51326274	BVDV	CTRL	OK	436.374	276.32	-0.659228	0.000603881	yes
C2	23:27231725-27243367	BVDV	CTRL	OK	21.489	13.614	-0.658502	0.000603881	yes
LOC100299600	11:106223488-106224764	BVDV	CTRL	OK	34.0056	21.5558	-0.657699	0.00386315	yes
GTF2IRD2	25:33212216-33259588	BVDV	CTRL	OK	4.57156	2.8993	-0.656979	0.00314915	yes
LOC100336589	18:62910385-62916393	BVDV	CTRL	OK	15.9953	10.1482	-0.656425	0.00197898	yes
EPS8	5:94553641-94750049	BVDV	CTRL	OK	3.51523	2.23069	-0.65613	0.00703952	yes
OLFML2B	3:7528021-7577299	BVDV	CTRL	OK	10.1578	6.44701	-0.65589	0.000603881	yes
APLP2	29:36844871-36907622	BVDV	CTRL	OK	107.572	68.2751	-0.655873	0.000603881	yes
CDC42EP4	19:58620113-58622767	BVDV	CTRL	OK	11.8348	7.51417	-0.655355	0.00110321	yes
PTP4A3	14:3578345-3586015	BVDV	CTRL	OK	6.86348	4.35827	-0.655186	0.0169612	yes
NME4	25:383467-386626	BVDV	CTRL	OK	21.9743	13.959	-0.654627	0.00488964	yes
EPB41L4A	10:1467375-1761415	BVDV	CTRL	OK	7.63087	4.84816	-0.654411	0.000603881	yes
CA11	18:55730116-55736497	BVDV	CTRL	OK	4.59406	2.91911	-0.654241	0.0456406	yes
NES	3:14208427-14215602	BVDV	CTRL	OK	1.93178	1.2275	-0.654207	0.0115338	yes
PPP1R16A	14:1628813-1633988	BVDV	CTRL	OK	4.26808	2.71305	-0.653671	0.0176268	yes
CC2D2A	6:115445246-115563715	BVDV	CTRL	OK	1.24092	0.789389	-0.652598	0.035793	yes
OASL	17:65446986-65463409	BVDV	CTRL	OK	4.33757	2.75995	-0.652245	0.0178144	yes
CXCL12	28:45410675-45418794	BVDV	CTRL	OK	183.655	116.932	-0.651326	0.000603881	yes
DLG5	28:33719656-33842951	BVDV	CTRL	OK	3.54164	2.25561	-0.650903	0.00110321	yes
TNFSF12	19:27893174-27901018	BVDV	CTRL	OK	17.4101	11.1028	-0.649007	0.00278749	yes
CDH13	18:9189534-10164197	BVDV	CTRL	OK	3.75922	2.39745	-0.648934	0.00417128	yes
ABCC9	5:88677585-88834493	BVDV	CTRL	OK	1.77531	1.13245	-0.648628	0.00314915	yes
KLF15	22:61283171-61292869	BVDV	CTRL	OK	4.42734	2.82458	-0.648404	0.0225653	yes
SNX7	3:44657521-44775833	BVDV	CTRL	OK	3.94353	2.51646	-0.648095	0.0296175	yes
APIP	15:66207588-66231698	BVDV	CTRL	OK	28.296	18.0673	-0.647221	0.000603881	yes
ACCS	15:75047568-75068529	BVDV	CTRL	OK	5.99395	3.82787	-0.646966	0.0164989	yes
ECM1	3:20228527-20233933	BVDV	CTRL	OK	8.4289	5.38772	-0.64567	0.00612767	yes
TMEM119	17:66586627-66593119	BVDV	CTRL	OK	8.25492	5.27884	-0.645033	0.00960826	yes
RASSF4	28:44940861-45014243	BVDV	CTRL	OK	18.764	12.0023	-0.644652	0.0174091	yes
PTPRD	8:36342558-36800975	BVDV	CTRL	OK	0.79618	0.509284	-0.644625	0.025589	yes
C3AR1	5:102025876-102035208	BVDV	CTRL	OK	17.0307	10.896	-0.644329	0.000603881	yes
NID2	10:44894655-44986659	BVDV	CTRL	OK	6.91623	4.42539	-0.644183	0.0178144	yes
FKBP11	5:31023447-31061198	BVDV	CTRL	OK	206.841	132.412	-0.643487	0.00314915	yes
KIFC2	14:1656360-1663803	BVDV	CTRL	OK	9.266	5.93227	-0.643361	0.000603881	yes
LGALS1	5:110008264-110019683	BVDV	CTRL	OK	398.703	255.281	-0.643229	0.000603881	yes
COL5A3	7:15768627-15813561	BVDV	CTRL	OK	3.03048	1.94066	-0.643	0.00278749	yes
F3	3:49110155-49121034	BVDV	CTRL	OK	4.13369	2.64736	-0.642877	0.0234046	yes
PLS3	X:71709927-71806534	BVDV	CTRL	OK	6.4277	4.12024	-0.641574	0.00197898	yes
NFIB	8:30004678-30156052	BVDV	CTRL	OK	3.81337	2.44527	-0.641073	0.0479558	yes
RAB20	12:89182099-89212365	BVDV	CTRL	OK	10.0704	6.45896	-0.640745	0.0309565	yes
UNC13B	8:59797488-60010848	BVDV	CTRL	OK	3.06492	1.96619	-0.640446	0.00278749	yes
PHLDB1	15:29788842-29837507	BVDV	CTRL	OK	7.30614	4.69026	-0.639443	0.000603881	yes
ATP13A2	2:136162615-136182586	BVDV	CTRL	OK	57.8207	37.1509	-0.63819	0.000603881	yes
ATOX1	7:64945747-64961110	BVDV	CTRL	OK	132.092	84.8867	-0.637929	0.000603881	yes
PTH1R	22:53161299-53224114	BVDV	CTRL	OK	6.77885	4.35871	-0.637138	0.00960826	yes
RBPMS	27:25637685-25816020	BVDV	CTRL	OK	18.4749	11.8808	-0.636937	0.00488964	yes
CCDC85C	21:66175706-66253519	BVDV	CTRL	OK	7.2509	4.66301	-0.636899	0.000603881	yes
RUSC2	8:60134671-60198469	BVDV	CTRL	OK	2.84558	1.83151	-0.635688	0.00703952	yes
TYROBP	18:46779847-46782546	BVDV	CTRL	OK	173.759	111.879	-0.635148	0.000603881	yes
LY9	3:8836989-8864398	BVDV	CTRL	OK	74.6145	48.093	-0.63363	0.000603881	yes
LSP1	29:50235907-50276209	BVDV	CTRL	OK	403.31	260.003	-0.633359	0.000603881	yes
RALGDS	11:103125340-103192049	BVDV	CTRL	OK	23.9138	15.4187	-0.633166	0.000603881	yes
C14H8orf73	14:2332750-2338560	BVDV	CTRL	OK	3.35302	2.16191	-0.633155	0.01456	yes
TNFRSF13C	5:113431893-113432550	BVDV	CTRL	OK	33.6232	21.6869	-0.63263	0.0176268	yes
ARHGEF10L	2:135557007-135701197	BVDV	CTRL	OK	11.3327	7.31641	-0.631284	0.000603881	yes
LOC100847619	20:26109723-26111313	BVDV	CTRL	OK	41.1459	26.5658	-0.631178	0.000603881	yes
WLS	3:77396242-77511241	BVDV	CTRL	OK	7.28531	4.70494	-0.630813	0.00521093	yes
TMEM176B	4:114199460-114207377	BVDV	CTRL	OK	28.927	18.6821	-0.63076	0.000603881	yes
SEMA3F	22:50733056-50756457	BVDV	CTRL	OK	7.92376	5.12045	-0.629915	0.00521093	yes
SYT4	24:12950390-12960189	BVDV	CTRL	OK	3.41559	2.20833	-0.62918	0.00612767	yes
TNFAIP8L3	10:59441301-59544629	BVDV	CTRL	OK	21.7362	14.055	-0.629012	0.000603881	yes
PDK4	4:12754201-12767677	BVDV	CTRL	OK	12.634	8.17197	-0.628552	0.000603881	yes
PLD4	21:70997329-71004742	BVDV	CTRL	OK	84.2948	54.5297	-0.628402	0.000603881	yes
CKAP4	5:69971125-69981003	BVDV	CTRL	OK	32.0085	20.71	-0.62813	0.000603881	yes
SIL1	7:51888628-52144488	BVDV	CTRL	OK	21.6583	14.0147	-0.627978	0.000603881	yes
FSTL1	1:65742625-65802423	BVDV	CTRL	OK	33.9602	21.9903	-0.626973	0.000603881	yes
PLEKHA4	18:55899134-55922868	BVDV	CTRL	OK	5.00366	3.24036	-0.626827	0.00844743	yes
RHOJ	10:75783881-75877396	BVDV	CTRL	OK	8.53681	5.52943	-0.626567	0.00155501	yes
HSPB1	25:34858437-34861035	BVDV	CTRL	OK	540.41	350.231	-0.625747	0.000603881	yes
CCDC3	13:11543627-11636251	BVDV	CTRL	OK	11.6485	7.55277	-0.625061	0.00110321	yes
FKBP2	29:43159738-43162661	BVDV	CTRL	OK	139.239	90.2914	-0.624903	0.000603881	yes
ADORA3	3:31900283-31986508	BVDV	CTRL	OK	43.6301	28.2981	-0.624621	0.000603881	yes
BTC	6:91430298-91480129	BVDV	CTRL	OK	2.05369	1.33301	-0.623532	0.0363837	yes
LRRC25	7:4704032-4708461	BVDV	CTRL	OK	28.6054	18.5681	-0.623462	0.000603881	yes
FBLN5	21:57153109-57246389	BVDV	CTRL	OK	4.47567	2.90673	-0.622707	0.0133466	yes
RENBP	X:40063730-40071020	BVDV	CTRL	OK	109.179	70.9309	-0.622204	0.000603881	yes
ZBTB32	18:46616258-46619888	BVDV	CTRL	OK	19.7996	12.868	-0.621692	0.000603881	yes
CPT1C	18:56547747-56566825	BVDV	CTRL	OK	13.0475	8.48534	-0.620731	0.000603881	yes
SIPA1L2	28:5250005-5367946	BVDV	CTRL	OK	1.40581	0.914286	-0.620689	0.0262373	yes
ST5	15:44335341-44460362	BVDV	CTRL	OK	6.234	4.05747	-0.619578	0.00155501	yes
CST3	13:42562165-42566091	BVDV	CTRL	OK	1573.94	1025.45	-0.618132	0.00197898	yes
LRP5	29:46481533-46573466	BVDV	CTRL	OK	17.6367	11.4909	-0.618089	0.000603881	yes
TNFRSF1A	5:104402770-104415588	BVDV	CTRL	OK	52.9313	34.489	-0.617984	0.000603881	yes
MGC139603	29:46407485-46417346	BVDV	CTRL	OK	18.5606	12.0984	-0.617425	0.00155501	yes
DKK3	15:41241521-41291992	BVDV	CTRL	OK	6.11408	3.98561	-0.617335	0.00703952	yes
AFAP1L1	7:62661627-62736436	BVDV	CTRL	OK	3.08753	2.01304	-0.61708	0.0302321	yes
TRIP6	25:36321718-36325556	BVDV	CTRL	OK	5.0426	3.29108	-0.615608	0.0380782	yes
MAP7D1	3:110233084-110259194	BVDV	CTRL	OK	27.0056	17.6428	-0.61418	0.000603881	yes
LOC100848343	18:57092219-57096687	BVDV	CTRL	OK	25.9115	16.9364	-0.613464	0.00453214	yes
ZNF385A	5:25802666-25822661	BVDV	CTRL	OK	14.8984	9.74915	-0.61181	0.00417128	yes
IL32	25:2492652-2497188	BVDV	CTRL	OK	116.55	76.2833	-0.611511	0.000603881	yes
RHBDF1	25:115789-134128	BVDV	CTRL	OK	9.87912	6.4682	-0.611018	0.00155501	yes
ZMYND15	19:27243293-27248391	BVDV	CTRL	OK	7.34289	4.80791	-0.610937	0.00417128	yes
PDLIM4	7:23443527-23457942	BVDV	CTRL	OK	15.6993	10.2797	-0.610897	0.00643727	yes
MARVELD1	26:18732856-18740516	BVDV	CTRL	OK	17.1966	11.2622	-0.610635	0.000603881	yes
D2HGDH	3:121212556-121237816	BVDV	CTRL	OK	10.2377	6.70623	-0.610317	0.000603881	yes
LOC100848313	8:9482219-9484818	BVDV	CTRL	OK	19.2455	12.6158	-0.609288	0.000603881	yes
PKIB	9:28880102-29001337	BVDV	CTRL	OK	66.844	43.8416	-0.608498	0.000603881	yes
SLC2A6	11:104417538-104424788	BVDV	CTRL	OK	14.0367	9.20806	-0.608233	0.000603881	yes
UACA	10:17516708-17559258	BVDV	CTRL	OK	3.54808	2.32936	-0.6071	0.00521093	yes
FERMT2	10:65766162-65843942	BVDV	CTRL	OK	7.74947	5.08872	-0.606797	0.00155501	yes
MYL9	13:66306259-66314230	BVDV	CTRL	OK	88.884	58.3965	-0.606042	0.000603881	yes
SVEP1	8:101583430-101668233	BVDV	CTRL	OK	1.39965	0.919717	-0.605807	0.0155258	yes
TMEM134	29:45997536-46002434	BVDV	CTRL	OK	29.1187	19.1441	-0.605044	0.00278749	yes
LOC784747	14:60993118-61520216	BVDV	CTRL	OK	1.84186	1.21119	-0.604734	0.0281879	yes
BLVRB	18:50056591-50073609	BVDV	CTRL	OK	77.6868	51.1224	-0.603716	0.000603881	yes
NXN	19:22457711-22621494	BVDV	CTRL	OK	13.8989	9.1477	-0.603494	0.000603881	yes
CRYL1	12:36187110-36243552	BVDV	CTRL	OK	32.231	21.2161	-0.603289	0.00110321	yes
ANXA2	10:49860061-49904536	BVDV	CTRL	OK	135.351	89.1955	-0.601665	0.000603881	yes
GAS1	8:81510918-81512087	BVDV	CTRL	OK	8.39614	5.53449	-0.601276	0.0467214	yes
LOC100848765	16:49312718-49315014	BVDV	CTRL	OK	25.1871	16.6057	-0.601013	0.00612767	yes
SEPN1	2:127851643-127869417	BVDV	CTRL	OK	15.0044	9.89642	-0.600408	0.000603881	yes
MVP	25:26661749-26681331	BVDV	CTRL	OK	73.3666	48.3956	-0.600249	0.000603881	yes
TGM2	13:67663134-67697607	BVDV	CTRL	OK	42.3847	27.9795	-0.599174	0.000603881	yes
SLC2A8	11:98161638-98170670	BVDV	CTRL	OK	10.5549	6.96828	-0.599038	0.00417128	yes
DOC2G	29:46114786-46119340	BVDV	CTRL	OK	12.8772	8.50387	-0.598626	0.00932137	yes
PRKD1	21:40528024-40875676	BVDV	CTRL	OK	2.01862	1.33347	-0.59819	0.0313563	yes
PLBD2	17:63313640-63335972	BVDV	CTRL	OK	52.9189	34.9714	-0.597608	0.000603881	yes
FGD2	23:10892082-10918349	BVDV	CTRL	OK	58.3	38.5384	-0.597199	0.000603881	yes
CTSF	29:45242550-45248115	BVDV	CTRL	OK	46.2094	30.5562	-0.59672	0.000603881	yes
MAFB	13:70066183-70069566	BVDV	CTRL	OK	39.7977	26.3198	-0.59654	0.000603881	yes
LOC100337108	12:72728426-72741314	BVDV	CTRL	OK	22.036	14.5765	-0.596212	0.0287879	yes
IL1RN	11:46699165-46706152	BVDV	CTRL	OK	5.22757	3.45803	-0.596187	0.0331223	yes
AGRN	16:52673187-52712371	BVDV	CTRL	OK	3.84853	2.54584	-0.596161	0.00110321	yes
MTSS1L	18:1530967-1547778	BVDV	CTRL	OK	6.40532	4.23786	-0.595935	0.00386315	yes
PILRA	25:36844051-36855872	BVDV	CTRL	OK	17.7557	11.7477	-0.595897	0.00703952	yes
LOC518134	7:18707207-18743679	BVDV	CTRL	OK	8.67211	5.73779	-0.595889	0.00417128	yes
FAM181B	29:13003057-13004913	BVDV	CTRL	OK	5.33114	3.52737	-0.595851	0.0436159	yes
SPEG	2:108089327-108147468	BVDV	CTRL	OK	2.01278	1.33222	-0.595354	0.00386315	yes
CCDC28B	2:122150080-122154154	BVDV	CTRL	OK	14.0993	9.33373	-0.595097	0.0273273	yes
LOC100336610	X:139055121-139056159	BVDV	CTRL	OK	56.8725	37.6583	-0.594762	0.00703952	yes
TSPAN4	29:50560711-50570675	BVDV	CTRL	OK	127.339	84.3303	-0.594548	0.000603881	yes
SIRPA	13:53668953-53710782	BVDV	CTRL	OK	49.8881	33.0401	-0.594478	0.000603881	yes
MAP1B	20:9325945-9419062	BVDV	CTRL	OK	1.43692	0.951728	-0.594355	0.00521093	yes
F8	X:38815309-38982287	BVDV	CTRL	OK	6.42821	4.25807	-0.594217	0.0447622	yes
LOC100848375	11:816138-878724	BVDV	CTRL	OK	44.3266	29.3885	-0.592923	0.00110321	yes
TMEM140	4:99699930-99719088	BVDV	CTRL	OK	22.3557	14.8286	-0.592255	0.00197898	yes
GLIS2	25:3492817-3499186	BVDV	CTRL	OK	6.73309	4.47048	-0.590839	0.00386315	yes
FLRT2	10:98332058-98338825	BVDV	CTRL	OK	7.07825	4.70481	-0.589254	0.000603881	yes
ZNF784	18:62371837-62374877	BVDV	CTRL	OK	13.5716	9.02637	-0.588375	0.00278749	yes
TMEM86A	29:26320612-26322751	BVDV	CTRL	OK	45.9799	30.592	-0.587848	0.000603881	yes
LOC509881	19:57485586-57504534	BVDV	CTRL	OK	11.2493	7.48507	-0.587747	0.0234046	yes
DPM3	3:15517157-15517733	BVDV	CTRL	OK	104.745	69.6984	-0.58769	0.00350101	yes
ARHGEF40	10:26057861-26077050	BVDV	CTRL	OK	3.50443	2.33314	-0.586903	0.00521093	yes
ANPEP	21:21620135-21637144	BVDV	CTRL	OK	7.3229	4.87628	-0.586633	0.00197898	yes
SLCO2B1	15:55151084-55203574	BVDV	CTRL	OK	41.348	27.5378	-0.586403	0.000603881	yes
MATN2	14:68478178-68651684	BVDV	CTRL	OK	4.09352	2.72635	-0.586368	0.00758658	yes
ANXA1	8:49624472-49642919	BVDV	CTRL	OK	62.513	41.6348	-0.586367	0.000603881	yes
ETV5	1:81725702-81784999	BVDV	CTRL	OK	3.93311	2.61969	-0.586273	0.00580788	yes
NYNRIN	10:20588781-20600788	BVDV	CTRL	OK	2.31913	1.54499	-0.585985	0.00758658	yes
RARRES1	1:109661961-109704523	BVDV	CTRL	OK	92.8397	61.8731	-0.585429	0.000603881	yes
LOC100848861	21:29773433-29776318	BVDV	CTRL	OK	13.377	8.91875	-0.584838	0.0196764	yes
MFAP4	19:34685356-34687894	BVDV	CTRL	OK	9.7536	6.50485	-0.58442	0.0157653	yes
SLCO2A1	1:136435601-136528514	BVDV	CTRL	OK	7.02768	4.6876	-0.5842	0.0213189	yes
TSPAN7	X:110029267-110188380	BVDV	CTRL	OK	69.2347	46.1948	-0.583765	0.000603881	yes
KLHDC8B	22:51427512-51432248	BVDV	CTRL	OK	4.96354	3.31357	-0.582984	0.0382692	yes
SOCS2	5:23523980-23528860	BVDV	CTRL	OK	5.95896	3.97887	-0.582702	0.014094	yes
AKR7A2	2:133953069-133956670	BVDV	CTRL	OK	30.414	20.3097	-0.582563	0.00314915	yes
DYRK1B	18:49650518-49658124	BVDV	CTRL	OK	24.2446	16.1923	-0.582357	0.00110321	yes
KDELR1	18:55523302-55534438	BVDV	CTRL	OK	65.0588	43.4564	-0.582176	0.000603881	yes
GPR4	18:53615944-53617690	BVDV	CTRL	OK	5.42376	3.62359	-0.581872	0.04152	yes
TGFBR3	3:51745875-51870036	BVDV	CTRL	OK	15.2665	10.2	-0.581804	0.000603881	yes
SPATS2L	2:89248278-89439610	BVDV	CTRL	OK	9.77263	6.53306	-0.580989	0.00278749	yes
GIPC1	7:12391793-12395710	BVDV	CTRL	OK	17.3511	11.6051	-0.580273	0.00314915	yes
SELO	5:119771355-119813611	BVDV	CTRL	OK	37.3801	25.0044	-0.580086	0.0398771	yes
CSGALNACT1	27:37841209-38016342	BVDV	CTRL	OK	12.4459	8.32687	-0.579823	0.000603881	yes
MGC142702	5:57758047-57762460	BVDV	CTRL	OK	7.09544	4.74778	-0.579639	0.00960826	yes
PPP1R3B	27:24314781-24323720	BVDV	CTRL	OK	4.65448	3.11501	-0.57938	0.0416884	yes
TMEM8A	25:365645-374631	BVDV	CTRL	OK	10.2333	6.84958	-0.579181	0.00453214	yes
GPR77	18:54777174-54781921	BVDV	CTRL	OK	6.48436	4.34429	-0.577842	0.00551311	yes
LAMP1	12:90609709-90639775	BVDV	CTRL	OK	243.967	163.469	-0.577672	0.000603881	yes
CEBPA	18:43928609-43929840	BVDV	CTRL	OK	10.5411	7.06336	-0.577602	0.0298542	yes
SELENBP1	3:19484699-19493477	BVDV	CTRL	OK	7.55469	5.06266	-0.577476	0.0178144	yes
VWA5A	29:27194433-27222075	BVDV	CTRL	OK	4.53524	3.03927	-0.577454	0.0199155	yes
PPP1R1B	19:40655221-40663767	BVDV	CTRL	OK	14.4056	9.65422	-0.577398	0.00580788	yes
GPX7	3:94323975-94331673	BVDV	CTRL	OK	19.8249	13.2909	-0.576877	0.00386315	yes
PQLC2	2:133933075-133949856	BVDV	CTRL	OK	24.9754	16.7547	-0.575945	0.00110321	yes
EBI3	7:21033463-21040668	BVDV	CTRL	OK	14.8051	9.93345	-0.575731	0.0128102	yes
CXCL16	19:27249527-27253097	BVDV	CTRL	OK	129.101	86.6722	-0.574854	0.000603881	yes
NOS3	4:114375966-114394483	BVDV	CTRL	OK	2.69975	1.81331	-0.574199	0.0313563	yes
GZMM	7:44797947-44803593	BVDV	CTRL	OK	30.4763	20.4722	-0.574024	0.00278749	yes
ST6GALNAC4	11:98585647-98594176	BVDV	CTRL	OK	85.5591	57.5008	-0.573339	0.000603881	yes
TGFB1I1	25:27762158-27766955	BVDV	CTRL	OK	6.29615	4.23171	-0.573228	0.028966	yes
IL18	15:22800424-22826666	BVDV	CTRL	OK	192.694	129.55	-0.572796	0.000603881	yes
APOE	18:53040104-53042792	BVDV	CTRL	OK	1473.85	991.125	-0.572447	0.0123084	yes
VKORC1	25:27457362-27459608	BVDV	CTRL	OK	40.7537	27.4175	-0.571832	0.00350101	yes
APP	1:9607381-9921005	BVDV	CTRL	OK	66.0382	44.4865	-0.569933	0.000603881	yes
CCRL2	22:53567798-53569696	BVDV	CTRL	OK	8.52248	5.74197	-0.569726	0.0317318	yes
SCD5	6:99233278-99410753	BVDV	CTRL	OK	3.08133	2.07646	-0.569428	0.0447622	yes
RND3	2:45800467-45822009	BVDV	CTRL	OK	4.35203	2.93369	-0.568972	0.0167377	yes
MOCS1	23:13832464-13866950	BVDV	CTRL	OK	17.7387	11.9592	-0.56878	0.000603881	yes
ABTB1	22:60502718-60507367	BVDV	CTRL	OK	279.392	188.395	-0.568528	0.00110321	yes
OAF	15:31312051-31331174	BVDV	CTRL	OK	26.5103	17.8762	-0.568508	0.000603881	yes
S100A14	3:16827336-16829403	BVDV	CTRL	OK	25.8926	17.4632	-0.568221	0.00417128	yes
ADAMTS2	7:1956351-2165242	BVDV	CTRL	OK	3.25881	2.1982	-0.568025	0.0135943	yes
YPEL3	25:26451071-26454436	BVDV	CTRL	OK	173.082	116.783	-0.567623	0.000603881	yes
DENND2A	4:104715492-104785986	BVDV	CTRL	OK	3.78411	2.55364	-0.567399	0.0133466	yes
HSD3B7	25:27375628-27379105	BVDV	CTRL	OK	12.8031	8.64242	-0.566988	0.00580788	yes
MAOA	X:105380190-105462564	BVDV	CTRL	OK	6.95609	4.69568	-0.566941	0.0162451	yes
LAMC1	16:65545496-65665386	BVDV	CTRL	OK	11.9354	8.05829	-0.566699	0.000603881	yes
TNS3	4:75451284-75570376	BVDV	CTRL	OK	31.9556	21.5753	-0.56669	0.000603881	yes
LOC100847757	4:40519354-40560779	BVDV	CTRL	OK	21.3989	14.4505	-0.566417	0.000603881	yes
COL7A1	22:51859651-51889954	BVDV	CTRL	OK	2.66524	1.79988	-0.566363	0.00350101	yes
TMBIM1	2:107020656-107093550	BVDV	CTRL	OK	33.8194	22.8816	-0.563664	0.0325617	yes
DDOST	2:132587723-132600988	BVDV	CTRL	OK	153.612	103.95	-0.563407	0.000603881	yes
FES	21:22192639-22204117	BVDV	CTRL	OK	26.9982	18.2738	-0.563082	0.000603881	yes
NDST1	7:63816087-63900637	BVDV	CTRL	OK	14.2906	9.67479	-0.56276	0.000603881	yes
ADA	13:73750478-73773897	BVDV	CTRL	OK	175.498	118.848	-0.562332	0.000603881	yes
BACE2	1:142875108-142980631	BVDV	CTRL	OK	5.42815	3.67775	-0.561637	0.0382692	yes
GPR56	18:25696802-25723493	BVDV	CTRL	OK	6.61464	4.48589	-0.56027	0.0101625	yes
LPHN2	3:62644404-63355165	BVDV	CTRL	OK	2.40934	1.63496	-0.559387	0.020634	yes
BATF	10:87110379-87132330	BVDV	CTRL	OK	78.262	53.1178	-0.559118	0.000603881	yes
FAM174A	7:102227148-102249414	BVDV	CTRL	OK	23.565	15.9944	-0.559076	0.00386315	yes
AXL	18:50677178-50710666	BVDV	CTRL	OK	33.6991	22.8747	-0.558958	0.000603881	yes
DNASE2	7:13790586-13793001	BVDV	CTRL	OK	130.35	88.5318	-0.558124	0.000603881	yes
THY1	15:30509503-30515399	BVDV	CTRL	OK	89.2208	60.6038	-0.557973	0.000603881	yes
SEC11C	24:58659024-58670239	BVDV	CTRL	OK	103.917	70.5888	-0.557918	0.000603881	yes
OGN	8:85383112-85619600	BVDV	CTRL	OK	27.4536	18.6588	-0.557142	0.0187455	yes
CSRP1	16:49332768-49353517	BVDV	CTRL	OK	90.494	61.5043	-0.557134	0.000603881	yes
SH2B2	25:35192584-35220133	BVDV	CTRL	OK	39.6229	26.9303	-0.557104	0.00155501	yes
ETS2	1:152872774-152891965	BVDV	CTRL	OK	9.85684	6.69939	-0.557097	0.00197898	yes
FTL	18:55992909-55994744	BVDV	CTRL	OK	597.612	406.276	-0.556752	0.000603881	yes
CTNND1	15:82283933-82329276	BVDV	CTRL	OK	10.6184	7.21973	-0.556554	0.000603881	yes
PCDHA13	7:53663778-53787482	BVDV	CTRL	OK	4.92778	3.35111	-0.5563	0.00386315	yes
PAPSS1	6:18740228-18854670	BVDV	CTRL	OK	27.2356	18.5237	-0.55612	0.000603881	yes
FKBP7	2:18413883-18421601	BVDV	CTRL	OK	10.712	7.28775	-0.555676	0.0409202	yes
PNPLA2	29:50742384-50747161	BVDV	CTRL	OK	21.8263	14.8536	-0.555248	0.00110321	yes
TST	5:75810520-75817101	BVDV	CTRL	OK	23.6871	16.1201	-0.555243	0.00521093	yes
LMF2	5:120016648-120020622	BVDV	CTRL	OK	33.0297	22.4786	-0.555214	0.000603881	yes
TMEM9	16:81545469-81552388	BVDV	CTRL	OK	46.8284	31.9015	-0.55376	0.00155501	yes
MERTK	11:332457-474293	BVDV	CTRL	OK	8.86284	6.03962	-0.553311	0.00197898	yes
PYROXD2	26:19334007-19359393	BVDV	CTRL	OK	16.2237	11.0595	-0.552817	0.00155501	yes
ROGDI	25:3894380-3900145	BVDV	CTRL	OK	46.5416	31.7354	-0.552428	0.000603881	yes
NOSTRIN	2:27317637-27380506	BVDV	CTRL	OK	18.3631	12.5348	-0.550868	0.00110321	yes
SH3BP2	6:108024780-108034628	BVDV	CTRL	OK	36.0673	24.6217	-0.550762	0.000603881	yes
TSC22D1	12:14722211-14725630	BVDV	CTRL	OK	132.923	90.7411	-0.550761	0.00110321	yes
TPST2	17:68445519-68499477	BVDV	CTRL	OK	76.8269	52.4667	-0.55021	0.000603881	yes
C3H1orf85	3:14558546-14561400	BVDV	CTRL	OK	29.1298	19.9022	-0.549572	0.00197898	yes
CSF1	3:33607138-33621030	BVDV	CTRL	OK	18.1756	12.4193	-0.549415	0.00239673	yes
ZNF579	18:62406976-62408659	BVDV	CTRL	OK	9.35241	6.39105	-0.549285	0.036994	yes
TMEM51	16:53534180-53538875	BVDV	CTRL	OK	13.1581	8.99392	-0.548925	0.00814978	yes
AQP3	8:76525365-76531321	BVDV	CTRL	OK	16.3892	11.2031	-0.548843	0.00314915	yes
PALLD	8:701735-925959	BVDV	CTRL	OK	12.0752	8.25575	-0.54858	0.000603881	yes
CD63	5:57854277-57857483	BVDV	CTRL	OK	338.221	231.343	-0.547931	0.000603881	yes
C18H16orf7	18:14624979-14634572	BVDV	CTRL	OK	5.52541	3.78157	-0.547098	0.0247279	yes
BCL7C	25:27214941-27218444	BVDV	CTRL	OK	134.675	92.2451	-0.545941	0.00239673	yes
C1S	5:103768064-103779250	BVDV	CTRL	OK	116.19	79.587	-0.545879	0.000603881	yes
PLA2R1	2:36373938-36508295	BVDV	CTRL	OK	3.45848	2.36915	-0.545766	0.00703952	yes
B3GALT4	23:7394228-7395864	BVDV	CTRL	OK	14.6852	10.0608	-0.545613	0.00902249	yes
CMTM7	22:6894654-6942332	BVDV	CTRL	OK	69.728	47.7766	-0.545434	0.000603881	yes
LOC100848900	X:99188219-99245645	BVDV	CTRL	OK	13.7772	9.44674	-0.544396	0.0315337	yes
PGM5	8:44682698-44892129	BVDV	CTRL	OK	6.28607	4.31049	-0.544306	0.00758658	yes
PPP1R13L	18:53432741-53447531	BVDV	CTRL	OK	4.629	3.17439	-0.544222	0.0260189	yes
IDUA	6:109088525-109103935	BVDV	CTRL	OK	24.1011	16.5287	-0.544123	0.000603881	yes
PVR	18:52760785-52841330	BVDV	CTRL	OK	5.89486	4.04336	-0.543903	0.0115338	yes
PPDPF	13:54607895-54609543	BVDV	CTRL	OK	320.996	220.199	-0.543752	0.000603881	yes
TSPAN9	5:107047162-107236972	BVDV	CTRL	OK	12.7976	8.79149	-0.541692	0.030028	yes
LAMA3	24:33072796-33156975	BVDV	CTRL	OK	2.26013	1.55273	-0.541604	0.0215097	yes
SDC3	2:123221290-123245513	BVDV	CTRL	OK	48.5884	33.3846	-0.541428	0.000603881	yes
PEX11G	7:17569053-17579485	BVDV	CTRL	OK	18.3913	12.6424	-0.54075	0.0130964	yes
FN1	2:103881401-103950562	BVDV	CTRL	OK	23.5295	16.1764	-0.54058	0.000603881	yes
MEST	4:95066961-95079691	BVDV	CTRL	OK	6.02573	4.14303	-0.540449	0.0249332	yes
CYP20A1	2:91899068-91943225	BVDV	CTRL	OK	22.2433	15.299	-0.539932	0.00155501	yes
LOC618633	21:20155581-20163194	BVDV	CTRL	OK	5.03557	3.46351	-0.539921	0.0403817	yes
ADAMTS1	1:8955133-8963831	BVDV	CTRL	OK	3.28436	2.25939	-0.539676	0.0203825	yes
DEXI	25:9666053-9680637	BVDV	CTRL	OK	24.6399	16.9519	-0.539544	0.00417128	yes
ABHD4	10:22044238-22056394	BVDV	CTRL	OK	65.5122	45.0916	-0.538906	0.000603881	yes
SLC15A3	29:37856700-37871626	BVDV	CTRL	OK	60.447	41.6054	-0.538901	0.000603881	yes
ITGAM	25:27602221-27639821	BVDV	CTRL	OK	19.3184	13.2995	-0.538607	0.000603881	yes
AGAP3	4:114460928-114517867	BVDV	CTRL	OK	15.0738	10.3775	-0.538585	0.000603881	yes
EMP3	18:55482511-55486850	BVDV	CTRL	OK	87.1754	60.0215	-0.538442	0.00110321	yes
LOC782367	3:12113770-12169430	BVDV	CTRL	OK	25.4887	17.5508	-0.538318	0.000603881	yes
ACVR1	2:39287888-39361501	BVDV	CTRL	OK	11.0028	7.58056	-0.537488	0.00155501	yes
ABCD1	X:39869942-39885759	BVDV	CTRL	OK	14.1441	9.74713	-0.537153	0.000603881	yes
C11H9orf7	11:104408231-104417214	BVDV	CTRL	OK	21.161	14.5911	-0.536314	0.00386315	yes
SELE	16:38179780-38192433	BVDV	CTRL	OK	12.3346	8.50555	-0.53624	0.00197898	yes
LPIN3	13:70666140-70683589	BVDV	CTRL	OK	3.15687	2.17695	-0.536186	0.049366	yes
ZNF358	7:17608985-17611850	BVDV	CTRL	OK	7.17363	4.94693	-0.536172	0.0169612	yes
PDE2A	15:52913330-52984107	BVDV	CTRL	OK	19.6394	13.5447	-0.536022	0.000603881	yes
PARM1	6:91597121-91723397	BVDV	CTRL	OK	24.5947	16.9672	-0.535592	0.00417128	yes
CLEC12A	5:100388588-100401107	BVDV	CTRL	OK	38.0366	26.2465	-0.535262	0.00197898	yes
CSRP2	5:6266100-6274473	BVDV	CTRL	OK	47.8611	33.0307	-0.535046	0.00278749	yes
CCDC85B	29:44671367-44672651	BVDV	CTRL	OK	19.8614	13.708	-0.534944	0.014094	yes
SDC4	13:74391485-74412874	BVDV	CTRL	OK	33.9647	23.4426	-0.534906	0.000603881	yes
ARHGAP22	28:43203812-43331571	BVDV	CTRL	OK	10.6992	7.38881	-0.534091	0.00551311	yes
PLSCR4	1:123231175-123273108	BVDV	CTRL	OK	3.4731	2.39862	-0.534021	0.0309565	yes
CRIP1	21:71390595-71399231	BVDV	CTRL	OK	553.524	382.284	-0.534	0.000603881	yes
CCDC102A	18:25580586-25602166	BVDV	CTRL	OK	24.1401	16.676	-0.533654	0.000603881	yes
BMP2	13:49550049-49561304	BVDV	CTRL	OK	4.10965	2.839	-0.533633	0.0397674	yes
PLD2	19:27176939-27189861	BVDV	CTRL	OK	12.4161	8.57764	-0.533558	0.00155501	yes
GSTA4	23:24963226-24977291	BVDV	CTRL	OK	13.7074	9.47386	-0.532925	0.0178144	yes
NOTCH4	23:26973190-26999202	BVDV	CTRL	OK	2.84472	1.96629	-0.532808	0.014094	yes
GALK1	19:56465682-56472220	BVDV	CTRL	OK	51.0489	35.3013	-0.532156	0.00110321	yes
CTSC	29:7433481-7473316	BVDV	CTRL	OK	240.872	166.612	-0.53177	0.000603881	yes
JUN	3:87841041-87843089	BVDV	CTRL	OK	33.1542	22.938	-0.531451	0.000603881	yes
ORAI2	25:35114123-35126594	BVDV	CTRL	OK	11.7303	8.11871	-0.530914	0.0101625	yes
DPYD	3:45563731-46487165	BVDV	CTRL	OK	7.40362	5.12558	-0.530517	0.00239673	yes
NR2F1	7:95454540-95464058	BVDV	CTRL	OK	22.968	15.9097	-0.529718	0.00314915	yes
LRRC16A	23:32029121-32339087	BVDV	CTRL	OK	3.01758	2.09073	-0.529388	0.0178144	yes
LOC783891	9:96977713-97006057	BVDV	CTRL	OK	2.35249	1.63054	-0.528838	0.0486785	yes
CNRIP1	11:66679941-66704192	BVDV	CTRL	OK	23.2212	16.1081	-0.527652	0.00110321	yes
TCF7L1	11:49507022-49715652	BVDV	CTRL	OK	5.77261	4.00544	-0.527263	0.0221551	yes
BCAR1	18:2612797-2652013	BVDV	CTRL	OK	23.629	16.4002	-0.526847	0.000603881	yes
PPP1R14A	18:48282646-48286857	BVDV	CTRL	OK	36.7639	25.5177	-0.526789	0.0152528	yes
VIM	13:31945011-31952941	BVDV	CTRL	OK	365.45	253.747	-0.526285	0.00197898	yes
ITM2C	2:119476495-119490381	BVDV	CTRL	OK	170.719	118.612	-0.525372	0.000603881	yes
TRIM3	15:47193827-47219562	BVDV	CTRL	OK	8.17974	5.6834	-0.525301	0.0128102	yes
GLT25D1	7:5471572-5493984	BVDV	CTRL	OK	40.964	28.4634	-0.525249	0.000603881	yes
CYBA	18:13931106-13938073	BVDV	CTRL	OK	532.525	370.101	-0.524931	0.00110321	yes
BAIAP2	19:52198616-52263263	BVDV	CTRL	OK	10.9539	7.61654	-0.524239	0.00673997	yes
SPINT2	18:48295521-48326744	BVDV	CTRL	OK	41.5769	28.9162	-0.523901	0.000603881	yes
C1R	5:103737160-103747961	BVDV	CTRL	OK	107	74.4338	-0.523586	0.000603881	yes
MAN2B1	7:13954084-13969421	BVDV	CTRL	OK	125.762	87.6191	-0.52138	0.000603881	yes
CALCRL	2:8901431-9030990	BVDV	CTRL	OK	5.12114	3.56876	-0.521044	0.00733648	yes
LOC539734	19:23888013-23925901	BVDV	CTRL	OK	6.08626	4.24143	-0.521005	0.00551311	yes
UNC5B	28:27511422-27599752	BVDV	CTRL	OK	3.67944	2.56543	-0.520287	0.0325617	yes
RNPEPL1	3:120320236-120325132	BVDV	CTRL	OK	81.4961	56.8334	-0.519992	0.000603881	yes
TPGS1	7:44780267-44784214	BVDV	CTRL	OK	33.7672	23.5556	-0.519555	0.00580788	yes
NGFR	19:37725117-37744573	BVDV	CTRL	OK	3.91602	2.73398	-0.518383	0.0332928	yes
LOC100848552	25:41297804-41298718	BVDV	CTRL	OK	49.3572	34.4602	-0.518329	0.00580788	yes
HDHD3	8:104331799-104334927	BVDV	CTRL	OK	20.805	14.5341	-0.517494	0.00386315	yes
DBNDD2	13:74458056-74462464	BVDV	CTRL	OK	25.2221	17.6199	-0.517478	0.00673997	yes
DCHS1	15:47042651-47064590	BVDV	CTRL	OK	3.35022	2.34059	-0.517386	0.00417128	yes
TBC1D12	26:15754392-15851777	BVDV	CTRL	OK	3.58888	2.50749	-0.517292	0.0196764	yes
KLF2	7:6615481-6647880	BVDV	CTRL	OK	123.934	86.6029	-0.517084	0.000603881	yes
ZNF296	18:53154420-53158137	BVDV	CTRL	OK	20.2169	14.1335	-0.516445	0.0101625	yes
LOC100847635	18:4477344-4486177	BVDV	CTRL	OK	90.6851	63.399	-0.516406	0.000603881	yes
RAPGEF3	5:32697064-32718624	BVDV	CTRL	OK	8.96393	6.26697	-0.516363	0.00612767	yes
STAP2	7:20966850-20978543	BVDV	CTRL	OK	15.7122	10.9851	-0.516331	0.0125717	yes
FCGR3A	3:7996510-8005232	BVDV	CTRL	OK	90.428	63.2282	-0.516203	0.00155501	yes
NCKIPSD	22:51773519-51785996	BVDV	CTRL	OK	4.18196	2.9246	-0.51594	0.0469194	yes
EIF4EBP1	27:32951593-32973439	BVDV	CTRL	OK	43.2254	30.2303	-0.515882	0.00703952	yes
SHISA5	22:51944012-51969645	BVDV	CTRL	OK	36.896	25.8041	-0.515867	0.00197898	yes
PODNL1	7:12865813-12871651	BVDV	CTRL	OK	11.0885	7.75696	-0.515496	0.0118002	yes
RXRA	11:105984609-106015053	BVDV	CTRL	OK	10.8367	7.5809	-0.515491	0.0107026	yes
PLK2	20:20854606-20860584	BVDV	CTRL	OK	12.1098	8.47461	-0.51496	0.00197898	yes
LOC100847392	16:52297487-52299450	BVDV	CTRL	OK	7.32461	5.1295	-0.513935	0.0378989	yes
CLN8	27:96503-112266	BVDV	CTRL	OK	34.3428	24.0545	-0.5137	0.00350101	yes
CD9	5:104505425-104544977	BVDV	CTRL	OK	83.5825	58.5576	-0.513344	0.000603881	yes
CISD3	19:39961384-39964283	BVDV	CTRL	OK	31.7735	22.2737	-0.512483	0.0409202	yes
SERPING1	15:82159473-82174900	BVDV	CTRL	OK	163.982	114.99	-0.512029	0.00350101	yes
BCKDHA	18:50819364-50838369	BVDV	CTRL	OK	28.8403	20.2259	-0.51188	0.00239673	yes
TEK	8:17040334-17143858	BVDV	CTRL	OK	4.9247	3.45374	-0.511877	0.00872462	yes
CDC42BPB	21:69278650-69347204	BVDV	CTRL	OK	6.74264	4.72994	-0.511493	0.00155501	yes
C23H6orf145	23:50077252-50095625	BVDV	CTRL	OK	25.2756	17.733	-0.511309	0.00386315	yes
ALDH1A1	8:49354206-49408166	BVDV	CTRL	OK	24.5508	17.2288	-0.510944	0.00197898	yes
LOC507443	19:54537797-54543761	BVDV	CTRL	OK	9.5161	6.67852	-0.510842	0.0426298	yes
IQSEC1	22:59523118-59550837	BVDV	CTRL	OK	17.1301	12.0262	-0.510353	0.00643727	yes
BLVRA	4:77966041-78017718	BVDV	CTRL	OK	11.6764	8.20416	-0.509173	0.00643727	yes
MYO1F	7:18351369-18388976	BVDV	CTRL	OK	51.7579	36.3739	-0.508875	0.000603881	yes
STOM	8:112646068-112680924	BVDV	CTRL	OK	55.9372	39.3606	-0.507054	0.000603881	yes
LOC100847165	25:26968128-26971209	BVDV	CTRL	OK	9.39198	6.60986	-0.50681	0.00758658	yes
FAM20A	19:62270268-62312187	BVDV	CTRL	OK	10.9502	7.70687	-0.506737	0.00758658	yes
AMOTL2	1:136054424-136072255	BVDV	CTRL	OK	7.2048	5.07131	-0.5066	0.00521093	yes
BOLA-DQA1	23:25350796-25356970	BVDV	CTRL	OK	360.687	254.029	-0.50575	0.0217397	yes
NKG7	18:57812521-57815252	BVDV	CTRL	OK	76.1681	53.6841	-0.504692	0.000603881	yes
FOXF1	18:12379773-12383777	BVDV	CTRL	OK	4.91333	3.46321	-0.504593	0.0446158	yes
C25H16orf5	25:3650393-3673924	BVDV	CTRL	OK	42.5629	30.0064	-0.504326	0.000603881	yes
TMEM184B	5:110486530-110536722	BVDV	CTRL	OK	15.7121	11.0855	-0.503196	0.00239673	yes
TLR4	8:108828898-108839911	BVDV	CTRL	OK	12.6834	8.95095	-0.502829	0.00350101	yes
HCK	13:62106256-62151619	BVDV	CTRL	OK	53.0817	37.4723	-0.502389	0.000603881	yes
FNDC3B	1:95888013-96173201	BVDV	CTRL	OK	11.6095	8.19634	-0.502254	0.000603881	yes
SPP1	6:38120577-38127541	BVDV	CTRL	OK	107.536	75.9214	-0.502246	0.000603881	yes
PIK3R6	19:28913864-28961787	BVDV	CTRL	OK	8.53045	6.02277	-0.502194	0.0109577	yes
SGCE	4:11840467-11911742	BVDV	CTRL	OK	6.67721	4.7151	-0.501958	0.0409202	yes
FGFR1	27:33250507-33300219	BVDV	CTRL	OK	10.9717	7.75016	-0.501492	0.00417128	yes
RAB32	9:84937642-84969790	BVDV	CTRL	OK	21.517	15.2111	-0.500359	0.00386315	yes
RILPL1	17:54358763-54400475	BVDV	CTRL	OK	8.64766	6.1144	-0.5001	0.0182757	yes
TOM1	5:73905662-73946203	BVDV	CTRL	OK	16.6221	11.7551	-0.499818	0.00453214	yes
RGL1	16:66270483-66441866	BVDV	CTRL	OK	18.2326	12.8996	-0.49919	0.000603881	yes
OTOG	15:35409566-35496317	BVDV	CTRL	OK	1.39831	0.989944	-0.498262	0.0437381	yes
SGSH	19:53041241-53048385	BVDV	CTRL	OK	49.1618	34.8077	-0.498129	0.000603881	yes
GFOD2	18:35344407-35383735	BVDV	CTRL	OK	6.16878	4.37016	-0.4973	0.0458405	yes
BICC1	28:14264881-14419070	BVDV	CTRL	OK	3.01447	2.1362	-0.496858	0.0223901	yes
SMO	4:93922580-93946896	BVDV	CTRL	OK	5.7075	4.04467	-0.496836	0.0221551	yes
GPX4	7:45205076-45207498	BVDV	CTRL	OK	131.398	93.121	-0.49676	0.000603881	yes
LOC535121	5:113466321-113470517	BVDV	CTRL	OK	10.418	7.38356	-0.496696	0.0422305	yes
RRAS	18:56497091-56501119	BVDV	CTRL	OK	36.3166	25.7423	-0.496486	0.00988715	yes
CLEC1A	5:100300780-100321219	BVDV	CTRL	OK	18.5511	13.1519	-0.496242	0.00155501	yes
KIRREL2	18:46743921-46752923	BVDV	CTRL	OK	8.18419	5.80287	-0.496074	0.01456	yes
TGFBR2	22:5141231-5233083	BVDV	CTRL	OK	89.9746	63.8268	-0.495355	0.00239673	yes
CTGF	9:70873215-70876451	BVDV	CTRL	OK	7.00656	4.97208	-0.494858	0.0262373	yes
NUCB2	15:35693294-35729293	BVDV	CTRL	OK	42.9895	30.5154	-0.494446	0.00155501	yes
PTDSS2	29:51176378-51177632	BVDV	CTRL	OK	18.8022	13.3465	-0.494445	0.0380782	yes
MPEG1	15:83667090-83671187	BVDV	CTRL	OK	117.691	83.5707	-0.493934	0.00350101	yes
DAPK1	8:82096667-82301981	BVDV	CTRL	OK	14.6416	10.3988	-0.493651	0.0160094	yes
GSDMD	14:2341281-2347798	BVDV	CTRL	OK	82.6668	58.7172	-0.493526	0.000603881	yes
CACNA1H	25:958030-985719	BVDV	CTRL	OK	3.43342	2.43965	-0.492972	0.00960826	yes
AMDHD2	25:2019788-2026472	BVDV	CTRL	OK	57.7064	41.0171	-0.492506	0.00239673	yes
ACO1	8:11480113-11543046	BVDV	CTRL	OK	20.3334	14.4557	-0.492217	0.00110321	yes
EFEMP2	29:44650626-44657896	BVDV	CTRL	OK	11.3249	8.05682	-0.491219	0.0130964	yes
LOC100847961	17:54245605-54274441	BVDV	CTRL	OK	5.23705	3.72593	-0.491155	0.0360023	yes
PRF1	28:26939279-26943395	BVDV	CTRL	OK	20.3627	14.4892	-0.490953	0.0174091	yes
LOC788801	23:34219120-34251090	BVDV	CTRL	OK	92.634	65.9312	-0.490582	0.00155501	yes
SLAMF7	3:8969736-8985751	BVDV	CTRL	OK	81.1795	57.7829	-0.490474	0.00239673	yes
FARP1	12:79189511-79429462	BVDV	CTRL	OK	5.64394	4.0184	-0.490081	0.00703952	yes
P2RX4	17:56173048-56189197	BVDV	CTRL	OK	26.5155	18.8788	-0.49007	0.00417128	yes
BMPER	4:63052080-63305357	BVDV	CTRL	OK	4.48503	3.1945	-0.489526	0.0281879	yes
SMPD1	15:47267700-47272165	BVDV	CTRL	OK	19.522	13.9051	-0.489491	0.00239673	yes
BAX	18:55985201-55989210	BVDV	CTRL	OK	70.475	50.1995	-0.489438	0.00673997	yes
PLP2	X:92294751-92297791	BVDV	CTRL	OK	84.4543	60.1714	-0.489093	0.00155501	yes
CTTN	29:48167167-48194210	BVDV	CTRL	OK	22.4311	15.9831	-0.488946	0.00155501	yes
BOLA-A	23:27646982-27652279	BVDV	CTRL	OK	321.57	229.138	-0.488915	0.00417128	yes
CD1D	3:12109651-12113247	BVDV	CTRL	OK	58.4548	41.659	-0.488694	0.000603881	yes
CDK3	19:56275536-56279838	BVDV	CTRL	OK	24.2776	17.3067	-0.488299	0.00417128	yes
PSAP	28:28124688-28157120	BVDV	CTRL	OK	597.437	425.911	-0.488234	0.0152528	yes
PTPRCAP	29:45972076-45974235	BVDV	CTRL	OK	694.47	495.285	-0.487654	0.00197898	yes
OSBPL1A	24:32680521-32897941	BVDV	CTRL	OK	10.0455	7.16432	-0.487645	0.00197898	yes
MANF	22:49946212-49950052	BVDV	CTRL	OK	183	130.52	-0.487575	0.00155501	yes
JAM2	1:10083031-10165613	BVDV	CTRL	OK	23.0309	16.4278	-0.487429	0.00350101	yes
LOC100300478	18:57937866-57953496	BVDV	CTRL	OK	10.5748	7.54318	-0.48738	0.0107026	yes
ZNF628	18:62475321-62481823	BVDV	CTRL	OK	5.96814	4.2576	-0.487243	0.0367991	yes
RHBDF2	19:55893570-55903544	BVDV	CTRL	OK	46.196	32.9708	-0.486581	0.00155501	yes
EMR1	7:18763198-18823651	BVDV	CTRL	OK	43.5176	31.08	-0.485613	0.00110321	yes
HSPA1A	23:27331771-27333870	BVDV	CTRL	OK	354.549	253.27	-0.485308	0.0138276	yes
BTBD6	21:71204280-71206428	BVDV	CTRL	OK	14.4942	10.3549	-0.485154	0.0157653	yes
FZD6	14:63357677-63392777	BVDV	CTRL	OK	3.23575	2.31202	-0.484943	0.0476507	yes
C7H19orf10	7:20683773-20695706	BVDV	CTRL	OK	77.179	55.1513	-0.484814	0.00155501	yes
HPCAL1	11:87191207-87307998	BVDV	CTRL	OK	26.9813	19.2813	-0.484757	0.00488964	yes
CTIF	24:48769620-49013492	BVDV	CTRL	OK	8.17812	5.84513	-0.484534	0.0420503	yes
SCPEP1	19:8018815-8052591	BVDV	CTRL	OK	90.0005	64.3474	-0.48405	0.00110321	yes
C4A	23:27175688-27196793	BVDV	CTRL	OK	61.6686	44.1007	-0.483736	0.00110321	yes
FADD	29:48027925-48030331	BVDV	CTRL	OK	68.8907	49.2987	-0.482761	0.00350101	yes
PARD3	13:18840198-19339255	BVDV	CTRL	OK	2.43021	1.7393	-0.482574	0.0294215	yes
CABLES1	24:33687285-33809828	BVDV	CTRL	OK	10.261	7.34384	-0.48256	0.01456	yes
COL27A1	8:105095606-105203080	BVDV	CTRL	OK	2.72065	1.94872	-0.481425	0.0334962	yes
ZNF428	18:52165403-52174453	BVDV	CTRL	OK	35.1539	25.1857	-0.481079	0.0203825	yes
SEMA4C	11:2784989-2793644	BVDV	CTRL	OK	16.2637	11.6537	-0.48087	0.00580788	yes
SCN1B	18:45960621-45970523	BVDV	CTRL	OK	15.6116	11.1896	-0.480462	0.0240704	yes
CCDC124	7:5157902-5168539	BVDV	CTRL	OK	51.5066	36.9415	-0.479517	0.00643727	yes
PDGFRA	6:71373512-71421283	BVDV	CTRL	OK	9.58078	6.87227	-0.479356	0.00155501	yes
MPG	25:139708-179871	BVDV	CTRL	OK	56.897	40.8121	-0.479355	0.0264454	yes
NAT9	19:57264602-57269369	BVDV	CTRL	OK	22.9089	16.4355	-0.479095	0.00197898	yes
2002-03-01	7:18269253-18283876	BVDV	CTRL	OK	27.6066	19.8172	-0.478257	0.00643727	yes
PLIN3	7:20503791-20524337	BVDV	CTRL	OK	8.36451	6.00614	-0.477844	0.0446158	yes
LOC100298822	23:28425331-28450252	BVDV	CTRL	OK	489.954	351.963	-0.47722	0.048513	yes
RUSC1	3:15355680-15365637	BVDV	CTRL	OK	11.8457	8.51118	-0.476935	0.00417128	yes
LOC781022	X:62476364-62551845	BVDV	CTRL	OK	445.864	320.359	-0.476914	0.0194363	yes
GDPD5	15:55392272-55483132	BVDV	CTRL	OK	8.6409	6.2115	-0.47624	0.0078671	yes
CD99	X:140185543-140215699	BVDV	CTRL	OK	39.0355	28.0623	-0.476149	0.00278749	yes
MPZL1	3:930874-1012734	BVDV	CTRL	OK	5.27536	3.79269	-0.476049	0.0251648	yes
ZNF524	18:62388929-62392089	BVDV	CTRL	OK	17.8398	12.8284	-0.475754	0.0225653	yes
FSCN1	25:39292718-39302192	BVDV	CTRL	OK	39.4793	28.3931	-0.475554	0.0172033	yes
CNPY3	23:16562932-16571558	BVDV	CTRL	OK	146.107	105.081	-0.475532	0.00155501	yes
PTPRB	5:43113409-43240577	BVDV	CTRL	OK	1.83598	1.32141	-0.474473	0.0361873	yes
SLC31A2	8:104101560-104109954	BVDV	CTRL	OK	17.9395	12.9124	-0.474384	0.0210864	yes
XBP1	17:70344600-70349566	BVDV	CTRL	OK	170.88	123.009	-0.474223	0.00197898	yes
PM20D1	16:3438788-3463795	BVDV	CTRL	OK	6.97842	5.02406	-0.474048	0.0402226	yes
CNN3	3:48763974-48794137	BVDV	CTRL	OK	67.0716	48.2889	-0.474009	0.00155501	yes
TRAF1	8:112194563-112214586	BVDV	CTRL	OK	38.2529	27.5502	-0.473504	0.00278749	yes
SCAND1	13:65744267-65745100	BVDV	CTRL	OK	130.792	94.241	-0.472843	0.00239673	yes
CYFIP1	2:996055-1104771	BVDV	CTRL	OK	19.2293	13.8606	-0.472318	0.00155501	yes
EXT1	14:48318417-48634025	BVDV	CTRL	OK	13.4492	9.69526	-0.47217	0.00488964	yes
ACAA1	22:11619693-11643912	BVDV	CTRL	OK	85.0574	61.3198	-0.472083	0.000603881	yes
WFS1	6:104672732-104696495	BVDV	CTRL	OK	4.84529	3.49441	-0.471535	0.0403817	yes
HSP90B1	5:67940791-67959532	BVDV	CTRL	OK	371.056	267.971	-0.469562	0.0345167	yes
NAPSA	18:56967953-56974402	BVDV	CTRL	OK	119.556	86.3455	-0.469497	0.00110321	yes
VSTM4	28:43676551-43762310	BVDV	CTRL	OK	5.85844	4.23388	-0.468538	0.0403817	yes
ABCA6	19:62027820-62093939	BVDV	CTRL	OK	4.97071	3.59287	-0.468314	0.0174091	yes
PKP4	2:37814941-37929695	BVDV	CTRL	OK	3.92421	2.83889	-0.467075	0.028966	yes
C3	7:18989626-19025593	BVDV	CTRL	OK	12.6211	9.13684	-0.466067	0.00386315	yes
MCF2L	12:90438565-90506316	BVDV	CTRL	OK	14.8751	10.7701	-0.46587	0.00278749	yes
CBR3	1:150144148-150153935	BVDV	CTRL	OK	17.9049	12.97	-0.465173	0.0437381	yes
CD14	7:53447568-53448985	BVDV	CTRL	OK	43.7789	31.7139	-0.46512	0.00350101	yes
GFPT2	7:772144-817756	BVDV	CTRL	OK	4.95179	3.58797	-0.464781	0.0483178	yes
FGR	2:126273221-126291825	BVDV	CTRL	OK	41.7726	30.276	-0.464383	0.00155501	yes
TMED3	21:25993164-26004028	BVDV	CTRL	OK	38.921	28.2213	-0.463764	0.00278749	yes
QSOX1	16:62804446-62847836	BVDV	CTRL	OK	51.5912	37.4197	-0.463327	0.00314915	yes
CKB	21:69809411-69812615	BVDV	CTRL	OK	46.9578	34.0784	-0.462508	0.00417128	yes
CDH2	24:28992665-29241119	BVDV	CTRL	OK	8.46763	6.14595	-0.462321	0.00872462	yes
LY96	14:39369424-39402263	BVDV	CTRL	OK	40.9773	29.7452	-0.462166	0.0437381	yes
GPBAR1	2:107011784-107014997	BVDV	CTRL	OK	19.9749	14.5048	-0.461658	0.0221551	yes
TMEM120A	25:34726227-34731680	BVDV	CTRL	OK	35.6755	25.908	-0.461537	0.00643727	yes
GAA	19:53100964-53113264	BVDV	CTRL	OK	9.643	7.00299	-0.461511	0.0167377	yes
MAP3K11	29:44444054-44460617	BVDV	CTRL	OK	29.6217	21.5193	-0.461023	0.00155501	yes
TNC	8:105965494-106067887	BVDV	CTRL	OK	17.1827	12.484	-0.460878	0.00155501	yes
GLUL	16:64948312-64958885	BVDV	CTRL	OK	208.738	151.704	-0.460434	0.00872462	yes
LIMK1	25:33750116-33775707	BVDV	CTRL	OK	12.5207	9.10659	-0.459339	0.0120531	yes
ABHD11	25:34041447-34043850	BVDV	CTRL	OK	17.8285	12.9722	-0.458762	0.0438733	yes
TIMP3	5:71475668-71926718	BVDV	CTRL	OK	52.3551	38.1067	-0.458284	0.00197898	yes
TPRN	11:105896915-105903699	BVDV	CTRL	OK	9.54498	6.94777	-0.458191	0.0446158	yes
TMED1	7:16524134-16527426	BVDV	CTRL	OK	25.7444	18.7531	-0.457132	0.0112595	yes
IFI27	21:59330562-59336765	BVDV	CTRL	OK	168.223	122.569	-0.456776	0.00902249	yes
PLEKHO2	10:45281368-45303690	BVDV	CTRL	OK	60.6616	44.2022	-0.456666	0.00197898	yes
SMARCA1	X:13358540-13433876	BVDV	CTRL	OK	6.88337	5.01704	-0.456278	0.0120531	yes
LHFPL2	10:9369309-9527328	BVDV	CTRL	OK	16.2844	11.8693	-0.456257	0.00521093	yes
RNF215	17:71531197-71535270	BVDV	CTRL	OK	30.8462	22.4842	-0.456181	0.00733648	yes
BRI3	25:38281389-38287455	BVDV	CTRL	OK	167.768	122.289	-0.456173	0.00239673	yes
CYB5R3	5:114009260-114024523	BVDV	CTRL	OK	90.5784	66.0452	-0.455713	0.00155501	yes
CREG1	3:1196981-1208369	BVDV	CTRL	OK	61.6535	44.9854	-0.454728	0.00278749	yes
SLC12A7	20:71394200-71420869	BVDV	CTRL	OK	52.6213	38.3999	-0.454544	0.00278749	yes
COX6B1	18:46574126-46574316	BVDV	CTRL	OK	1233.94	900.684	-0.454177	0.0273273	yes
SASH1	9:86811454-87001716	BVDV	CTRL	OK	6.09119	4.44851	-0.4534	0.00643727	yes
TK2	18:34366714-34393113	BVDV	CTRL	OK	22.533	16.4667	-0.452489	0.00417128	yes
NPC2	10:86170652-86179237	BVDV	CTRL	OK	333.658	243.846	-0.452398	0.00488964	yes
SLC29A1	23:17845968-17856159	BVDV	CTRL	OK	129.938	94.9784	-0.45215	0.00278749	yes
ARID5A	11:2526185-2537851	BVDV	CTRL	OK	56.2721	41.1329	-0.452126	0.00314915	yes
RABEP2	25:26175181-26204652	BVDV	CTRL	OK	54.1809	39.606	-0.452065	0.00314915	yes
SERTAD1	18:50040254-50043146	BVDV	CTRL	OK	27.7431	20.2861	-0.451633	0.0174091	yes
LOC100337081	7:18589085-18684360	BVDV	CTRL	OK	8.87871	6.49229	-0.451621	0.0294215	yes
ALKBH4	25:35102454-35109899	BVDV	CTRL	OK	47.7678	34.9395	-0.451178	0.00902249	yes
BSG	7:44816939-44823915	BVDV	CTRL	OK	174.285	127.508	-0.450868	0.00239673	yes
LOC534506	26:44047439-44081511	BVDV	CTRL	OK	17.3002	12.6607	-0.450432	0.00733648	yes
TMUB1	4:114455521-114457946	BVDV	CTRL	OK	36.9708	27.0563	-0.450424	0.00673997	yes
PDLIM2	8:70388328-70401480	BVDV	CTRL	OK	60.507	44.2879	-0.450189	0.00350101	yes
DKFZP761E198	29:44563254-44566140	BVDV	CTRL	OK	14.4624	10.5918	-0.449358	0.0125717	yes
OCIAD2	6:69175240-69187080	BVDV	CTRL	OK	16.4689	12.0628	-0.449182	0.0192173	yes
MPST	5:75817921-75827378	BVDV	CTRL	OK	60.7372	44.5074	-0.448535	0.00350101	yes
ALDH9A1	3:3252170-3281221	BVDV	CTRL	OK	40.3845	29.5953	-0.448432	0.00110321	yes
VAMP5	11:49249757-49258304	BVDV	CTRL	OK	127.276	93.3679	-0.446962	0.00417128	yes
ARHGEF10	27:216368-266108	BVDV	CTRL	OK	3.71028	2.72253	-0.446582	0.0365916	yes
SSR4	X:39925627-39929382	BVDV	CTRL	OK	1056.62	775.59	-0.446087	0.00733648	yes
LIPA	26:10988283-11030717	BVDV	CTRL	OK	111.546	81.894	-0.445806	0.00521093	yes
ENTPD1	26:17048734-17148147	BVDV	CTRL	OK	8.72789	6.40825	-0.445702	0.0446158	yes
SYDE1	7:9032042-9042665	BVDV	CTRL	OK	9.28128	6.82182	-0.444167	0.0208529	yes
TJP1	21:28931887-29123023	BVDV	CTRL	OK	6.77518	4.97985	-0.444158	0.00733648	yes
LAG3	5:104029080-104035920	BVDV	CTRL	OK	19.2097	14.1247	-0.443612	0.0257998	yes
REPIN1	4:113601337-113605802	BVDV	CTRL	OK	11.1285	8.18644	-0.442955	0.0235985	yes
LOC100849055	29:47554780-47556335	BVDV	CTRL	OK	14.4222	10.6199	-0.441517	0.0416884	yes
MAPKAPK3	22:50281952-50310036	BVDV	CTRL	OK	30.9555	22.7951	-0.44147	0.00551311	yes
BHLHE40	22:21492895-21498551	BVDV	CTRL	OK	37.7372	27.8163	-0.440059	0.00417128	yes
LOC100848367	17:74927011-74951184	BVDV	CTRL	OK	34.9134	25.7389	-0.439828	0.01456	yes
GSS	13:64842137-64867355	BVDV	CTRL	OK	9.14374	6.74227	-0.43955	0.0477889	yes
DNAJB11	1:81234017-81252216	BVDV	CTRL	OK	53.4942	39.4737	-0.438492	0.00386315	yes
CLCN7	25:1135568-1156102	BVDV	CTRL	OK	58.5066	43.178	-0.438305	0.00197898	yes
NINJ1	8:85936414-85947675	BVDV	CTRL	OK	26.8522	19.8223	-0.437916	0.0249332	yes
DCLK1	12:25362947-25641458	BVDV	CTRL	OK	2.49177	1.83953	-0.437831	0.048513	yes
FRMD4A	13:28631454-28961637	BVDV	CTRL	OK	5.77139	4.26302	-0.437044	0.0234046	yes
H2AFJ	5:95568129-95568806	BVDV	CTRL	OK	224.724	166.026	-0.436747	0.00453214	yes
ADI1	8:112948193-112954511	BVDV	CTRL	OK	38.1986	28.2502	-0.43526	0.0143222	yes
ITFG3	25:282553-290840	BVDV	CTRL	OK	16.8511	12.4634	-0.435143	0.0120531	yes
CCR1	22:53851968-53858017	BVDV	CTRL	OK	24.078	17.8118	-0.434883	0.00643727	yes
CYB5A	24:4413369-4448936	BVDV	CTRL	OK	27.0809	20.042	-0.434253	0.00580788	yes
PQLC1	24:806808-846949	BVDV	CTRL	OK	36.2099	26.7997	-0.434169	0.00350101	yes
C16H1orf93	16:51553540-51556655	BVDV	CTRL	OK	40.5208	29.9905	-0.434153	0.028966	yes
TMEM2	8:48223035-48303993	BVDV	CTRL	OK	25.8045	19.109	-0.433371	0.00197898	yes
AHCY	13:64258555-64274274	BVDV	CTRL	OK	436.165	323.088	-0.432947	0.030028	yes
RAB7B	16:3574451-3605372	BVDV	CTRL	OK	7.65871	5.67378	-0.432792	0.0409202	yes
SLC39A13	15:78442312-78450583	BVDV	CTRL	OK	23.3844	17.3282	-0.432421	0.00758658	yes
LOC512271	25:41273516-41296379	BVDV	CTRL	OK	27.2377	20.1891	-0.432023	0.00932137	yes
C11H9orf142	11:106229011-106233455	BVDV	CTRL	OK	59.9714	44.4527	-0.432003	0.030404	yes
HMOX1	5:73980775-73987841	BVDV	CTRL	OK	150.869	111.841	-0.431848	0.00612767	yes
MSRB3	5:48560767-48743354	BVDV	CTRL	OK	4.98434	3.69624	-0.431342	0.0424236	yes
IL1R1	11:6848041-6931607	BVDV	CTRL	OK	11.6953	8.67512	-0.430976	0.0128102	yes
ALDH4A1	2:134345969-134380243	BVDV	CTRL	OK	15.0511	11.1652	-0.430856	0.01456	yes
S100A11	3:18768798-18770271	BVDV	CTRL	OK	285.579	211.864	-0.43075	0.00551311	yes
HSD17B8	23:7331888-7334006	BVDV	CTRL	OK	34.4955	25.6014	-0.430181	0.0283888	yes
UCP2	15:54196169-54202633	BVDV	CTRL	OK	308.494	228.959	-0.430154	0.00758658	yes
CHID1	29:50539407-50558480	BVDV	CTRL	OK	94.7968	70.3685	-0.429908	0.00350101	yes
KANK1	8:44045567-44106898	BVDV	CTRL	OK	11.4715	8.52093	-0.428971	0.00314915	yes
C21H15orf39	21:33933715-33939819	BVDV	CTRL	OK	13.039	9.68641	-0.428797	0.00902249	yes
XDH	11:14176296-14236376	BVDV	CTRL	OK	77.1388	57.3109	-0.428647	0.00872462	yes
CCBL1	11:99347602-99384152	BVDV	CTRL	OK	16.7446	12.4408	-0.428611	0.0245216	yes
THAP3	16:47623670-47629295	BVDV	CTRL	OK	55.9376	41.5971	-0.427338	0.00673997	yes
MAPK3	25:26437043-26444129	BVDV	CTRL	OK	31.8502	23.6929	-0.426848	0.00580788	yes
PCOLCE	25:36490770-36495789	BVDV	CTRL	OK	58.4114	43.4535	-0.426778	0.00733648	yes
ZNHIT1	25:36050525-36056887	BVDV	CTRL	OK	55.903	41.6077	-0.426074	0.0217397	yes
FRMD4B	22:32471629-32498351	BVDV	CTRL	OK	13.2906	9.89634	-0.42544	0.0104295	yes
AKR1A1	3:101106703-101118441	BVDV	CTRL	OK	133.402	99.3617	-0.425021	0.00314915	yes
NR4A1	5:27977006-27992869	BVDV	CTRL	OK	11.2829	8.40518	-0.424792	0.0294215	yes
CD82	15:75507141-75567303	BVDV	CTRL	OK	103.94	77.4523	-0.424369	0.00110321	yes
NAGK	11:13405925-13415101	BVDV	CTRL	OK	53.3917	39.7859	-0.424359	0.0078671	yes
ANXA6	7:64359560-64406299	BVDV	CTRL	OK	128.431	95.7314	-0.423925	0.00733648	yes
PLEKHO1	3:20519703-20528784	BVDV	CTRL	OK	93.09	69.4429	-0.4228	0.00551311	yes
ITGAD	25:27709270-27736723	BVDV	CTRL	OK	5.95281	4.4421	-0.422329	0.0428223	yes
ANXA5	6:3542634-3575330	BVDV	CTRL	OK	60.778	45.3961	-0.42098	0.00521093	yes
CLEC9A	5:100328281-100340537	BVDV	CTRL	OK	36.3838	27.1783	-0.42084	0.0152528	yes
IL33	8:38724601-38792047	BVDV	CTRL	OK	32.1315	24.0099	-0.42036	0.00580788	yes
INPP5A	26:51125093-51200927	BVDV	CTRL	OK	9.73476	7.27588	-0.420024	0.0380782	yes
ALAD	8:104342904-104352823	BVDV	CTRL	OK	32.297	24.1404	-0.419953	0.0185367	yes
CTNNA1	7:51688097-51846748	BVDV	CTRL	OK	53.3849	39.9047	-0.419873	0.00521093	yes
ACSF2	19:36871717-36903082	BVDV	CTRL	OK	51.1789	38.2988	-0.41825	0.00758658	yes
MICALL2	25:42015482-42035251	BVDV	CTRL	OK	10.0299	7.51272	-0.416906	0.0329287	yes
SFRP1	27:35900359-35943920	BVDV	CTRL	OK	26.4637	19.8319	-0.41619	0.00758658	yes
PLAU	28:29964982-29971029	BVDV	CTRL	OK	65.288	48.9311	-0.416066	0.00350101	yes
CTSA	13:75368316-75384734	BVDV	CTRL	OK	305.428	228.967	-0.415692	0.0172033	yes
TBC1D8	11:6009121-6149923	BVDV	CTRL	OK	35.0514	26.2783	-0.415598	0.00417128	yes
UBE2S	18:62537350-62541237	BVDV	CTRL	OK	200.241	150.145	-0.415386	0.00278749	yes
RAB11FIP3	25:405089-465053	BVDV	CTRL	OK	18.9281	14.1933	-0.415323	0.0104295	yes
CXCR3	X:84355315-84356415	BVDV	CTRL	OK	27.8329	20.8772	-0.414862	0.0393673	yes
MYH10	19:28680826-28800880	BVDV	CTRL	OK	3.58665	2.69068	-0.414669	0.0385873	yes
CHN1	2:21880322-22081288	BVDV	CTRL	OK	10.2562	7.69435	-0.414622	0.0395675	yes
GMDS	23:51115435-51453571	BVDV	CTRL	OK	78.8911	59.1959	-0.414367	0.00551311	yes
AKAP12	9:89552397-89567141	BVDV	CTRL	OK	4.56777	3.42783	-0.414194	0.0187455	yes
MGMT	26:49122094-49443160	BVDV	CTRL	OK	22.7563	17.0855	-0.413491	0.0281879	yes
NME3	25:1348410-1349600	BVDV	CTRL	OK	61.7574	46.3784	-0.41316	0.0194363	yes
RAB13	3:16511099-16515182	BVDV	CTRL	OK	33.2996	25.0147	-0.412732	0.0196764	yes
NPEPL1	13:58207118-58222950	BVDV	CTRL	OK	24.3934	18.3244	-0.412724	0.0135943	yes
GEMIN7	18:53160658-53167520	BVDV	CTRL	OK	57.7594	43.4168	-0.411802	0.0257998	yes
PHPT1	11:106334243-106335688	BVDV	CTRL	OK	84.2037	63.3125	-0.411393	0.0234046	yes
GHDC	19:42945926-42950372	BVDV	CTRL	OK	37.6811	28.3438	-0.410809	0.00488964	yes
SQSTM1	7:1317087-1346051	BVDV	CTRL	OK	192.026	144.459	-0.410646	0.0150533	yes
SDF4	16:52464840-52481611	BVDV	CTRL	OK	75.2336	56.642	-0.409504	0.0143222	yes
MXD4	6:108490180-108501583	BVDV	CTRL	OK	50.0579	37.7149	-0.408462	0.0194363	yes
C4H7orf41	4:66610953-66643765	BVDV	CTRL	OK	3.26618	2.46106	-0.408322	0.0446158	yes
FAM207A	1:145154623-145178776	BVDV	CTRL	OK	61.8861	46.6328	-0.408269	0.0150533	yes
VEGFB	29:43155132-43157956	BVDV	CTRL	OK	40.5102	30.5503	-0.4071	0.0157653	yes
GRK5	26:39702549-39930996	BVDV	CTRL	OK	22.0879	16.6585	-0.406993	0.0135943	yes
STARD13	12:27866073-28033238	BVDV	CTRL	OK	5.30283	4.00153	-0.406212	0.0382692	yes
CCS	29:45274393-45288012	BVDV	CTRL	OK	79.6809	60.1453	-0.405783	0.00988715	yes
TOLLIP	29:51319496-51335168	BVDV	CTRL	OK	87.415	65.9901	-0.40563	0.00643727	yes
HSPA12B	13:51901881-51918849	BVDV	CTRL	OK	11.668	8.80846	-0.40559	0.0283888	yes
ARSA	5:120152351-120155489	BVDV	CTRL	OK	27.6794	20.9029	-0.40511	0.020634	yes
ST6GALNAC2	19:55803306-55822127	BVDV	CTRL	OK	67.532	51.0183	-0.404556	0.00488964	yes
UNC119	19:20567268-20572913	BVDV	CTRL	OK	192.723	145.69	-0.403621	0.0078671	yes
DYSF	11:12894975-13123270	BVDV	CTRL	OK	11.6696	8.82747	-0.402686	0.0107026	yes
PLA2G2D4	2:133149386-133157295	BVDV	CTRL	OK	87.3187	66.0674	-0.402354	0.0107026	yes
SHC1	3:15671382-15681845	BVDV	CTRL	OK	66.4998	50.3198	-0.402225	0.00521093	yes
PCK2	10:20870275-20878563	BVDV	CTRL	OK	18.2928	13.8451	-0.4019	0.0192173	yes
APOBR	25:26314935-26324595	BVDV	CTRL	OK	25.8829	19.5901	-0.401875	0.00872462	yes
C18H19orf76	18:56546191-56547223	BVDV	CTRL	OK	70.1178	53.0732	-0.401797	0.0229618	yes
PNP	10:26667690-26673916	BVDV	CTRL	OK	145.761	110.332	-0.401753	0.00758658	yes
SLC35C1	15:76725254-76732705	BVDV	CTRL	OK	7.48934	5.67135	-0.401146	0.049366	yes
TNKS1BP1	15:81792126-81813276	BVDV	CTRL	OK	7.36855	5.57998	-0.401122	0.0275509	yes
RIN2	13:39764798-39872398	BVDV	CTRL	OK	8.68977	6.58052	-0.401115	0.0223901	yes
MSRA	8:8635549-9019576	BVDV	CTRL	OK	20.2182	15.3121	-0.40098	0.0438733	yes
UBXN6	7:20879419-20891487	BVDV	CTRL	OK	37.7918	28.625	-0.400796	0.0192173	yes
SELPLG	17:66557187-66573394	BVDV	CTRL	OK	81.6798	61.8765	-0.400587	0.00758658	yes
CHPF2	4:114610855-114615302	BVDV	CTRL	OK	15.8056	11.9746	-0.400458	0.0260189	yes
DOCK1	26:46758606-47296203	BVDV	CTRL	OK	3.2504	2.46328	-0.400035	0.0398771	yes
DOK2	8:69724696-69729317	BVDV	CTRL	OK	36.1571	27.402	-0.399998	0.0150533	yes
PGM3	9:23358370-23384788	BVDV	CTRL	OK	10.6768	8.09328	-0.399685	0.0497076	yes
CNPY2	5:57354891-57357904	BVDV	CTRL	OK	66.6517	50.5437	-0.39911	0.0225653	yes
EPAS1	11:28576238-28755962	BVDV	CTRL	OK	15.1444	11.4851	-0.399015	0.0257998	yes
OS9	5:56070689-56104924	BVDV	CTRL	OK	117.067	88.7842	-0.398954	0.0107026	yes
IFNGR2	1:1375921-1407251	BVDV	CTRL	OK	83.9757	63.6964	-0.398759	0.00612767	yes
SMOC2	9:104225986-104384492	BVDV	CTRL	OK	17.2696	13.1012	-0.398543	0.0182757	yes
LOC100298868	4:99881663-99948551	BVDV	CTRL	OK	14.2504	10.8123	-0.398336	0.0257998	yes
C11H2orf28	11:72405111-72409446	BVDV	CTRL	OK	48.5138	36.836	-0.39728	0.0327456	yes
TAX1BP3	19:24951987-24977062	BVDV	CTRL	OK	83.543	63.455	-0.396784	0.0307873	yes
C11H2orf18	11:72793628-72809693	BVDV	CTRL	OK	12.101	9.19496	-0.39621	0.0238261	yes
ARID3A	7:45084726-45114530	BVDV	CTRL	OK	15.6018	11.8551	-0.396203	0.0234046	yes
UPK3B	25:35018573-35023605	BVDV	CTRL	OK	15.1453	11.5135	-0.395548	0.0343274	yes
ARMC7	19:56957743-56972759	BVDV	CTRL	OK	22.9683	17.4687	-0.394871	0.0283888	yes
VASH1	10:89026217-89048248	BVDV	CTRL	OK	12.4145	9.45194	-0.393343	0.0128102	yes
LOC516108	25:556857-558249	BVDV	CTRL	OK	57.8033	44.0188	-0.393031	0.028966	yes
B3GNT3	7:5271355-5291295	BVDV	CTRL	OK	15.1337	11.5269	-0.392763	0.0363837	yes
P4HB	19:51643809-51653754	BVDV	CTRL	OK	193.549	147.542	-0.39157	0.0194363	yes
FKBP14	4:66758678-66770727	BVDV	CTRL	OK	8.31866	6.34511	-0.390705	0.0483178	yes
CLTB	7:39210774-39230742	BVDV	CTRL	OK	43.7108	33.3414	-0.390676	0.028966	yes
FAM100A	25:3744165-3749205	BVDV	CTRL	OK	26.8376	20.4805	-0.390006	0.038739	yes
SLC35C2	13:75799601-75809779	BVDV	CTRL	OK	35.4709	27.0711	-0.389879	0.0185367	yes
GUSB	25:28162567-28174955	BVDV	CTRL	OK	47.1989	36.0405	-0.389133	0.0120531	yes
BCL3	18:52922245-52931573	BVDV	CTRL	OK	46.4831	35.4945	-0.38911	0.0118002	yes
FLNA	X:40310749-40335761	BVDV	CTRL	OK	57.2582	43.7456	-0.388343	0.0247279	yes
RAB11FIP5	11:11315113-11358461	BVDV	CTRL	OK	11.6217	8.88056	-0.388101	0.0231922	yes
ACADS	17:65220604-65237484	BVDV	CTRL	OK	30.834	23.5652	-0.387865	0.0180422	yes
GJA1	9:30127780-30140793	BVDV	CTRL	OK	13.0127	9.94519	-0.387849	0.0253866	yes
ATP5D	7:45302251-45304424	BVDV	CTRL	OK	193.583	148.069	-0.386677	0.00814978	yes
LOC100337074	23:50680967-50682355	BVDV	CTRL	OK	70.243	53.7451	-0.386221	0.0135943	yes
DHRS1	10:20704885-20713841	BVDV	CTRL	OK	23.0894	17.6673	-0.386148	0.0389529	yes
AP2A1	18:56593126-56626309	BVDV	CTRL	OK	36.0978	27.6569	-0.384272	0.0285888	yes
ANXA3	6:95065255-95136949	BVDV	CTRL	OK	136.848	104.892	-0.383668	0.0125717	yes
TBC1D22A	5:118086467-118343834	BVDV	CTRL	OK	24.7339	18.9586	-0.383641	0.0229618	yes
LOC504548	23:28873221-28875583	BVDV	CTRL	OK	74.694	57.2531	-0.383637	0.0247279	yes
ITGA5	5:25778011-25799053	BVDV	CTRL	OK	24.8024	19.0144	-0.383387	0.0130964	yes
GLIPR2	8:60797958-60816819	BVDV	CTRL	OK	76.1066	58.3609	-0.383018	0.0189895	yes
TBC1D10A	17:71459353-71470127	BVDV	CTRL	OK	47.5202	36.4413	-0.382966	0.0180422	yes
AOAH	4:60940662-61125665	BVDV	CTRL	OK	12.9358	9.92249	-0.382594	0.0266527	yes
GIT1	19:21390162-21408923	BVDV	CTRL	OK	13.298	10.2062	-0.381758	0.0194363	yes
TMEM219	25:26549203-26566103	BVDV	CTRL	OK	60.9989	46.822	-0.381597	0.0229618	yes
RPN1	22:59952593-59965987	BVDV	CTRL	OK	149.956	115.144	-0.381098	0.0160094	yes
DNAJC3	12:76958977-77024110	BVDV	CTRL	OK	60.3361	46.3325	-0.380996	0.0120531	yes
EPN1	18:62316244-62324320	BVDV	CTRL	OK	112.564	86.4913	-0.380124	0.0104295	yes
SDPR	2:80857694-80871115	BVDV	CTRL	OK	8.41119	6.46452	-0.379766	0.0420503	yes
RNF122	27:28449632-28947295	BVDV	CTRL	OK	37.3217	28.6959	-0.379168	0.0135943	yes
ASPSCR1	19:51499064-51528835	BVDV	CTRL	OK	58.5203	45.0506	-0.377389	0.0182757	yes
C8H9orf102	8:84094286-84134898	BVDV	CTRL	OK	9.33904	7.19253	-0.376775	0.0481516	yes
ABHD12	13:43187468-43240717	BVDV	CTRL	OK	79.4404	61.2075	-0.376164	0.0115338	yes
TMEM160	18:54532952-54535397	BVDV	CTRL	OK	81.595	62.9106	-0.375179	0.0497076	yes
PCBP4	22:49521551-49533582	BVDV	CTRL	OK	41.9641	32.3674	-0.374613	0.0150533	yes
TNFRSF4	16:52484467-52487312	BVDV	CTRL	OK	46.7979	36.1063	-0.374195	0.0317318	yes
CALCOCO1	5:26489543-26503713	BVDV	CTRL	OK	45.3711	35.0184	-0.373659	0.0143222	yes
KIF1C	19:27013895-27043780	BVDV	CTRL	OK	23.5119	18.1624	-0.372435	0.0143222	yes
IMPDH1	4:93382311-93399661	BVDV	CTRL	OK	31.7635	24.5441	-0.371995	0.0215097	yes
BAD	29:43190200-43201979	BVDV	CTRL	OK	50.5841	39.0912	-0.371838	0.0424236	yes
GLTSCR2	18:55089142-55097796	BVDV	CTRL	OK	319.894	247.247	-0.371642	0.0234046	yes
NEU1	23:27305645-27309607	BVDV	CTRL	OK	18.3724	14.2011	-0.371543	0.0486785	yes
HEXA	10:19092345-19126422	BVDV	CTRL	OK	32.5982	25.2129	-0.370626	0.0208529	yes
FGL2	4:44152040-44269638	BVDV	CTRL	OK	42.9005	33.1844	-0.370487	0.0180422	yes
LEMD2	23:7841999-7858371	BVDV	CTRL	OK	40.1282	31.0517	-0.369942	0.01456	yes
AP2S1	18:54363678-54373314	BVDV	CTRL	OK	109.547	84.7699	-0.369932	0.0196764	yes
SLC25A29	21:66852434-66865682	BVDV	CTRL	OK	19.1716	14.8413	-0.369358	0.0329287	yes
SEC24D	6:7651872-7767010	BVDV	CTRL	OK	17.6393	13.6563	-0.369231	0.0178144	yes
CINP	21:68789510-68803852	BVDV	CTRL	OK	58.0552	44.9697	-0.368472	0.0253866	yes
AKR1B1	4:99016784-99033590	BVDV	CTRL	OK	54.5905	42.2969	-0.368099	0.0172033	yes
COMMD9	15:67563697-67576723	BVDV	CTRL	OK	34.2153	26.5221	-0.367443	0.0444688	yes
FAM125A	7:5611160-5615225	BVDV	CTRL	OK	46.516	36.0603	-0.367316	0.027764	yes
C5H12orf57	5:103878770-103880611	BVDV	CTRL	OK	161.928	125.562	-0.366959	0.0133466	yes
C2H1orf38	2:126056501-126070735	BVDV	CTRL	OK	43.7347	33.9266	-0.366363	0.0155258	yes
NENF	16:73013320-73019896	BVDV	CTRL	OK	117.361	91.0709	-0.365887	0.0169612	yes
MRPL54	7:21435491-21438615	BVDV	CTRL	OK	32.5722	25.2862	-0.36529	0.0245216	yes
SH2D2A	3:14075265-14085163	BVDV	CTRL	OK	17.1985	13.3537	-0.365044	0.0434248	yes
HOPX	6:73639365-73648429	BVDV	CTRL	OK	40.0883	31.1268	-0.365026	0.0476507	yes
MRPS2	11:106447319-106450536	BVDV	CTRL	OK	57.8619	44.9578	-0.364042	0.0225653	yes
PTMS	5:104039249-104040501	BVDV	CTRL	OK	502.378	390.353	-0.363993	0.0229618	yes
CNDP2	24:4267544-4278276	BVDV	CTRL	OK	93.1957	72.4321	-0.363633	0.0138276	yes
UBL7	21:34601364-34614703	BVDV	CTRL	OK	44.0918	34.2938	-0.36256	0.030028	yes
LMAN2	7:40185727-40206355	BVDV	CTRL	OK	127.13	98.8816	-0.36253	0.0178144	yes
LFNG	25:41304498-41313035	BVDV	CTRL	OK	65.617	51.0369	-0.362528	0.0152528	yes
ACSS2	13:64794727-64841520	BVDV	CTRL	OK	14.1536	11.0088	-0.362515	0.0385873	yes
PHGDH	3:23672338-23703529	BVDV	CTRL	OK	173.684	135.125	-0.362173	0.0285888	yes
GBA	3:15445101-15463930	BVDV	CTRL	OK	22.7059	17.6704	-0.361728	0.0384723	yes
SEMA4B	21:21998031-22042261	BVDV	CTRL	OK	33.8417	26.3469	-0.361172	0.0187455	yes
RNASEK	19:27436502-27438228	BVDV	CTRL	OK	110.33	85.931	-0.36057	0.0283888	yes
TRIB2	11:85205521-85233638	BVDV	CTRL	OK	12.2833	9.57114	-0.359937	0.0422305	yes
GMPPA	2:108153425-108160405	BVDV	CTRL	OK	42.8055	33.3707	-0.359214	0.0225653	yes
MTCH1	23:10854190-10873802	BVDV	CTRL	OK	106.575	83.1325	-0.358386	0.0187455	yes
PFKL	1:145770057-145797206	BVDV	CTRL	OK	30.8601	24.072	-0.358385	0.0215097	yes
ATP6V0B	3:102670947-102674697	BVDV	CTRL	OK	83.5336	65.2032	-0.357414	0.0262373	yes
FAM89B	29:44420405-44422039	BVDV	CTRL	OK	37.6072	29.3701	-0.356658	0.0438733	yes
SDCBP	14:26428475-26447183	BVDV	CTRL	OK	115.358	90.1149	-0.356283	0.0235985	yes
MYO1G	4:77317226-77333096	BVDV	CTRL	OK	69.8944	54.62	-0.355747	0.0215097	yes
TNK2	1:71207393-71230157	BVDV	CTRL	OK	32.6501	25.5274	-0.355042	0.0208529	yes
LMAN1	24:58797002-58815926	BVDV	CTRL	OK	57.5708	45.0161	-0.354899	0.0234046	yes
DTNBP1	23:41076274-41165361	BVDV	CTRL	OK	58.7536	45.979	-0.353703	0.0311781	yes
SLC37A2	29:28865146-28892893	BVDV	CTRL	OK	28.2709	22.126	-0.353572	0.0213189	yes
BRMS1	29:45035735-45042778	BVDV	CTRL	OK	61.687	48.2834	-0.353439	0.0213189	yes
HMOX2	25:3621446-3649597	BVDV	CTRL	OK	25.7856	20.1839	-0.353357	0.0449499	yes
TMEM189	13:78882066-78907460	BVDV	CTRL	OK	44.5915	34.9383	-0.35196	0.0264454	yes
TMED9	7:40475154-40479124	BVDV	CTRL	OK	184.71	144.769	-0.351509	0.0281879	yes
HM13	13:61644663-61683597	BVDV	CTRL	OK	101.719	79.7345	-0.351319	0.0219605	yes
TAB1	5:111346361-111372218	BVDV	CTRL	OK	19.2289	15.076	-0.351028	0.0400373	yes
CTSW	29:44661697-44665098	BVDV	CTRL	OK	86.6105	67.9177	-0.350753	0.0260189	yes
SUMF1	22:21994944-22088654	BVDV	CTRL	OK	25.984	20.3772	-0.350668	0.0307873	yes
NANS	8:63650014-63669724	BVDV	CTRL	OK	71.9841	56.453	-0.35063	0.0249332	yes
SLC3A2	29:41855870-41896761	BVDV	CTRL	OK	45.1642	35.4363	-0.34995	0.0238261	yes
TMEM115	22:50559653-50564392	BVDV	CTRL	OK	30.5552	23.9748	-0.349899	0.0309565	yes
SEC61A1	22:60217807-60229341	BVDV	CTRL	OK	97.543	76.5541	-0.349559	0.0229618	yes
C8H9orf3	8:82590160-83012157	BVDV	CTRL	OK	20.1558	15.8192	-0.349521	0.025589	yes
MYO5C	10:58180624-58279278	BVDV	CTRL	OK	8.90214	6.98978	-0.348906	0.0307873	yes
WDFY3	6:101286904-101484302	BVDV	CTRL	OK	3.69253	2.89958	-0.348766	0.036994	yes
PBXIP1	3:15687453-15703044	BVDV	CTRL	OK	87.4354	68.6592	-0.348764	0.027764	yes
LOC100847474	23:27323580-27326228	BVDV	CTRL	OK	95.3404	74.8811	-0.348486	0.031951	yes
C11H9orf86	11:106344497-106363593	BVDV	CTRL	OK	59.3919	46.6626	-0.348001	0.0242875	yes
POLR3A	28:33875844-33924983	BVDV	CTRL	OK	8.33704	6.55067	-0.347894	0.0373578	yes
CIITA	25:9604333-9663428	BVDV	CTRL	OK	80.4689	63.2343	-0.347725	0.0355951	yes
CENPB	13:51874893-51877511	BVDV	CTRL	OK	22.1307	17.3952	-0.34736	0.0367991	yes
MCOLN1	7:17614262-17623107	BVDV	CTRL	OK	36.6603	28.8261	-0.34684	0.0315337	yes
PDDC1	29:50849496-50854699	BVDV	CTRL	OK	43.2109	33.9781	-0.346791	0.0354084	yes
SSBP4	7:4672929-4688983	BVDV	CTRL	OK	48.0097	37.7545	-0.346678	0.0327456	yes
PIK3IP1	17:72198071-72208758	BVDV	CTRL	OK	27.1343	21.3388	-0.346641	0.0345167	yes
SBF2	15:42970972-43482359	BVDV	CTRL	OK	6.581	5.17819	-0.345859	0.0331223	yes
NAGA	5:113553951-113562090	BVDV	CTRL	OK	37.5587	29.5578	-0.345608	0.0325617	yes
RNF130	7:1082594-1226412	BVDV	CTRL	OK	101.726	80.0924	-0.344951	0.0221551	yes
MRPL41	11:105594964-105595605	BVDV	CTRL	OK	165.896	130.62	-0.3449	0.0329287	yes
C2CD2L	15:30214149-30224044	BVDV	CTRL	OK	23.0574	18.1568	-0.344724	0.0253866	yes
ATP6AP1	X:40402700-40410481	BVDV	CTRL	OK	69.2768	54.5762	-0.3441	0.0231922	yes
CCL2	19:16232955-16234822	BVDV	CTRL	OK	85.6953	67.5297	-0.343694	0.0334962	yes
SH3BGRL	X:70399108-70527059	BVDV	CTRL	OK	35.5015	27.9783	-0.343571	0.0325617	yes
FKBP8	7:4566145-4574949	BVDV	CTRL	OK	205.093	161.731	-0.342682	0.0331223	yes
DNAJB9	4:59970935-59973819	BVDV	CTRL	OK	26.9233	21.2392	-0.342127	0.0413248	yes
FAM43A	1:73467723-73469929	BVDV	CTRL	OK	46.4708	36.6823	-0.341239	0.0266527	yes
PDLIM7	7:40333462-40353545	BVDV	CTRL	OK	97.5343	77.0039	-0.340978	0.030404	yes
TKT	22:48264564-48288061	BVDV	CTRL	OK	127.913	101.013	-0.340618	0.0307873	yes
TMEM109	29:37833098-37841879	BVDV	CTRL	OK	38.9996	30.7983	-0.340609	0.0336991	yes
FKBP15	8:104111965-104171821	BVDV	CTRL	OK	20.6128	16.2968	-0.338949	0.030404	yes
PPFIBP1	5:82540672-82609403	BVDV	CTRL	OK	10.2953	8.14419	-0.338147	0.0420503	yes
ELL2	7:97621823-97693509	BVDV	CTRL	OK	26.7694	21.193	-0.336998	0.0287879	yes
ATP6V0C	25:2014228-2019603	BVDV	CTRL	OK	255.41	202.219	-0.336898	0.0307873	yes
CLTA	8:60849477-60867215	BVDV	CTRL	OK	247.041	195.631	-0.336615	0.0355951	yes
BOLA	23:28502520-28506312	BVDV	CTRL	OK	124.174	98.3408	-0.336501	0.046026	yes
S100A10	3:18799611-18810545	BVDV	CTRL	OK	164.857	130.643	-0.33559	0.0361873	yes
LAMP2	X:4846777-4879916	BVDV	CTRL	OK	71.6048	56.746	-0.335537	0.0442798	yes
C25H7orf59	25:36788649-36791965	BVDV	CTRL	OK	175.807	139.34	-0.335383	0.038739	yes
FAM195B	19:51665457-51667846	BVDV	CTRL	OK	100.561	79.7942	-0.333711	0.0313563	yes
SSR3	1:111996967-112008222	BVDV	CTRL	OK	129.962	103.304	-0.331201	0.0307873	yes
C11H9orf16	11:98801790-98805191	BVDV	CTRL	OK	127.659	101.49	-0.33096	0.0486785	yes
SLC4A2	4:114438014-114450607	BVDV	CTRL	OK	23.0756	18.3537	-0.330294	0.0382692	yes
SLC35B1	19:37546940-37553770	BVDV	CTRL	OK	65.3518	52.0099	-0.32944	0.04152	yes
POR	25:34700879-34726074	BVDV	CTRL	OK	31.8673	25.3788	-0.328456	0.0411292	yes
DERL3	17:73241608-73243689	BVDV	CTRL	OK	129.743	103.331	-0.328388	0.0400373	yes
RAB31	24:42256653-42308234	BVDV	CTRL	OK	17.2165	13.7212	-0.327385	0.0378989	yes
OGFR	13:55043085-55050690	BVDV	CTRL	OK	45.1276	36.0226	-0.325107	0.0385873	yes
IRF5	4:93706186-93717881	BVDV	CTRL	OK	68.9732	55.0943	-0.324132	0.0343274	yes
PVRIG	25:36726018-36729802	BVDV	CTRL	OK	81.1164	64.7948	-0.324116	0.0391666	yes
SEPX1	25:1503558-1508211	BVDV	CTRL	OK	65.5297	52.3678	-0.323468	0.0416884	yes
NDUFS8	29:46205044-46208797	BVDV	CTRL	OK	119.885	95.8424	-0.322912	0.0398771	yes
TPRG1L	16:50687997-50704904	BVDV	CTRL	OK	164.587	131.609	-0.322597	0.031951	yes
LGALS3BP	19:54035258-54045166	BVDV	CTRL	OK	46.7258	37.3639	-0.322573	0.0389529	yes
GSTP1	29:46087141-46090009	BVDV	CTRL	OK	227.992	182.66	-0.319821	0.0456406	yes
ID3	2:129895412-129897012	BVDV	CTRL	OK	152.213	121.982	-0.319426	0.0432333	yes
ARRDC1	11:105541712-105549236	BVDV	CTRL	OK	63.2115	50.6871	-0.318569	0.0476507	yes
MGAT1	7:41337277-41354610	BVDV	CTRL	OK	51.1661	41.0334	-0.318387	0.0444688	yes
PRKCSH	7:17034683-17048121	BVDV	CTRL	OK	104.564	83.9552	-0.316687	0.0437381	yes
CIB1	21:22043352-22046525	BVDV	CTRL	OK	94.2444	75.6777	-0.316539	0.0474974	yes
TSPAN13	4:25213087-25251241	BVDV	CTRL	OK	69.662	56.0563	-0.313496	0.0436159	yes
TMEM214	11:72582293-72590668	BVDV	CTRL	OK	65.2731	52.5262	-0.31345	0.0474974	yes
STXBP2	7:17706869-17715988	BVDV	CTRL	OK	62.4053	50.2714	-0.311932	0.0447622	yes
ATP6V0D1	18:35165957-35205066	BVDV	CTRL	OK	90.0284	72.5284	-0.311833	0.049366	yes
YIPF3	23:17031088-17035360	BVDV	CTRL	OK	76.5349	61.6623	-0.311728	0.046566	yes
HDAC5	19:44538302-44575554	BVDV	CTRL	OK	29.7331	23.9949	-0.309339	0.0438733	yes
TRIP11	21:57262241-57331317	BVDV	CTRL	OK	10.2019	12.5906	0.303507	0.0492319	yes
SCFD1	21:41692841-41804341	BVDV	CTRL	OK	39.8798	49.3731	0.308065	0.0488731	yes
RNF111	10:51288676-51380159	BVDV	CTRL	OK	13.8687	17.1909	0.309812	0.0473147	yes
DLG1	1:72120620-72391186	BVDV	CTRL	OK	13.0081	16.1409	0.311309	0.0483178	yes
LOC505564	7:19260188-19272631	BVDV	CTRL	OK	45.107	55.9722	0.311362	0.0440629	yes
UBR3	2:26360603-26565223	BVDV	CTRL	OK	8.26012	10.2597	0.312747	0.0451092	yes
TRAPPC8	24:25568788-25653090	BVDV	CTRL	OK	17.9246	22.2671	0.312975	0.0420503	yes
LOC515697	5:74673522-74688916	BVDV	CTRL	OK	19.4395	24.1538	0.313259	0.0492319	yes
ZZZ3	3:67231236-67349981	BVDV	CTRL	OK	18.6927	23.2317	0.313614	0.0446158	yes
CLASP1	2:73488190-73762423	BVDV	CTRL	OK	7.71205	9.59003	0.314421	0.0451092	yes
KIAA0101	10:45700242-45709248	BVDV	CTRL	OK	81.4963	101.345	0.314463	0.049366	yes
PSMD12	19:50114344-50134717	BVDV	CTRL	OK	34.0535	42.3548	0.314722	0.046026	yes
PARP4	12:36656104-36727198	BVDV	CTRL	OK	9.36791	11.6555	0.315211	0.0492319	yes
LOC789374	18:65316063-65322151	BVDV	CTRL	OK	15.1766	18.8869	0.315535	0.0477889	yes
LIN7C	15:58994221-59004197	BVDV	CTRL	OK	18.2221	22.6787	0.315644	0.0463673	yes
POGZ	3:19361110-19410846	BVDV	CTRL	OK	14.8399	18.4729	0.315931	0.0402226	yes
BOD1L	6:113647964-113701414	BVDV	CTRL	OK	9.25114	11.5265	0.317255	0.0444688	yes
TP53BP1	21:55682742-55750487	BVDV	CTRL	OK	14.4974	18.0646	0.317371	0.0413248	yes
CEP104	16:50494823-50535089	BVDV	CTRL	OK	11.2893	14.0829	0.318994	0.0452121	yes
VPS13D	16:42079660-42349474	BVDV	CTRL	OK	4.94894	6.17384	0.319047	0.0451092	yes
DIP2B	5:29347732-29579488	BVDV	CTRL	OK	16.2519	20.2744	0.319052	0.037551	yes
MARCKSL1	2:122053549-122055798	BVDV	CTRL	OK	96.8123	120.907	0.320631	0.0400373	yes
SMAD2	24:47971044-48022060	BVDV	CTRL	OK	31.5905	39.4544	0.320696	0.0438733	yes
NUP205	4:100178311-100258653	BVDV	CTRL	OK	10.8034	13.4966	0.321102	0.0378989	yes
POLD4	29:45899596-45901384	BVDV	CTRL	OK	135.951	169.862	0.321282	0.0409202	yes
MRPL4	7:15998422-16007536	BVDV	CTRL	OK	46.0162	57.512	0.321721	0.0451092	yes
ELK3	5:60823239-60891359	BVDV	CTRL	OK	25.1034	31.3787	0.321899	0.0497076	yes
CAB39L	12:19014240-19107404	BVDV	CTRL	OK	20.2524	25.3171	0.322018	0.0451092	yes
ELOVL5	23:25155741-25228997	BVDV	CTRL	OK	30.9004	38.6305	0.322112	0.0385873	yes
ATP6V0A2	17:54201716-54241005	BVDV	CTRL	OK	12.6218	15.7851	0.322653	0.0422305	yes
PRPF3	3:20355562-20374193	BVDV	CTRL	OK	38.2564	47.8701	0.323426	0.0339014	yes
RBM26	12:54776037-54851742	BVDV	CTRL	OK	12.0051	15.023	0.323526	0.0391666	yes
ANGEL2	16:72473638-72491702	BVDV	CTRL	OK	15.1181	18.9202	0.323654	0.0371518	yes
COMMD8	6:67745740-67761255	BVDV	CTRL	OK	37.2701	46.6457	0.323726	0.0365916	yes
LEMD3	5:48771460-48844489	BVDV	CTRL	OK	8.7404	10.9394	0.323756	0.0488731	yes
SENP2	1:82176393-82210749	BVDV	CTRL	OK	28.9706	36.272	0.324268	0.0377438	yes
LOC783344	X:50446614-50451114	BVDV	CTRL	OK	25.0859	31.4089	0.324297	0.0467214	yes
HECTD1	21:42120659-42196324	BVDV	CTRL	OK	16.7554	20.9808	0.324443	0.038739	yes
TCF3	7:45599592-45630734	BVDV	CTRL	OK	53.198	66.6227	0.324643	0.037551	yes
VPS54	11:62301307-62377281	BVDV	CTRL	OK	17.5968	22.0462	0.325214	0.038739	yes
SLU7	7:74099276-74114659	BVDV	CTRL	OK	18.3516	22.9987	0.325645	0.0437381	yes
MED14	X:108241527-108303280	BVDV	CTRL	OK	11.0885	13.9005	0.326068	0.0380782	yes
CDK13	4:81665557-81807550	BVDV	CTRL	OK	15.9927	20.0528	0.326393	0.0447622	yes
RALGAPB	13:68040824-68116278	BVDV	CTRL	OK	14.4609	18.1328	0.326443	0.0336991	yes
ARRDC3	7:93240414-93253094	BVDV	CTRL	OK	20.8597	26.1633	0.32683	0.0490824	yes
PDS5B	12:28330214-28445729	BVDV	CTRL	OK	7.99307	10.0254	0.326833	0.0343274	yes
MX1	1:143172671-143204866	BVDV	CTRL	OK	73.426	92.133	0.327427	0.0492319	yes
WDR36	10:87643150-87686651	BVDV	CTRL	OK	13.2612	16.6492	0.328241	0.0331223	yes
TAF1D	29:1056626-1062580	BVDV	CTRL	OK	37.9042	47.6	0.328602	0.0398771	yes
CWC22	2:16837597-16883245	BVDV	CTRL	OK	13.6714	17.1715	0.328858	0.0432333	yes
NUDT21	18:24267848-24282456	BVDV	CTRL	OK	50.1151	63.0527	0.331311	0.0438733	yes
MSH2	11:29648304-29730537	BVDV	CTRL	OK	25.3138	31.8617	0.331895	0.0343274	yes
C11H2orf49	11:9240934-9251400	BVDV	CTRL	OK	15.1104	19.0233	0.332222	0.0354084	yes
PMPCB	4:44755330-44769494	BVDV	CTRL	OK	31.8034	40.0668	0.333227	0.0411292	yes
C21H14orf49	21:61852803-61963799	BVDV	CTRL	OK	10.3814	13.0824	0.333637	0.0403817	yes
KIAA1430	27:14553980-14579529	BVDV	CTRL	OK	6.98933	8.80911	0.333841	0.0499155	yes
LOC100847120	18:51036756-51038413	BVDV	CTRL	OK	224.651	283.149	0.333872	0.0434248	yes
DNMT1	7:15913444-15956917	BVDV	CTRL	OK	32.1268	40.4971	0.334042	0.0327456	yes
WDR37	13:46646841-46679926	BVDV	CTRL	OK	23.1494	29.1836	0.334181	0.0449499	yes
PLDN	10:65111920-65126559	BVDV	CTRL	OK	17.7841	22.4312	0.334919	0.0413248	yes
CCT6A	25:27985752-27994510	BVDV	CTRL	OK	55.0043	69.3933	0.335252	0.028966	yes
ATP10D	6:67787937-67922536	BVDV	CTRL	OK	15.7755	19.9046	0.335424	0.0302321	yes
FBXO9	23:25030302-25051794	BVDV	CTRL	OK	56.2059	70.9366	0.335809	0.0287879	yes
PAN3	12:31858285-31982596	BVDV	CTRL	OK	51.6582	65.2075	0.33604	0.049366	yes
IFI47	7:41823773-41840054	BVDV	CTRL	OK	46.2923	58.4352	0.336066	0.0365916	yes
KIF21B	16:81388471-81421640	BVDV	CTRL	OK	20.1324	25.4322	0.337133	0.0317318	yes
MTMR1	X:33558426-33635000	BVDV	CTRL	OK	15.1025	19.0794	0.337231	0.0403817	yes
ANAPC1	11:483847-584788	BVDV	CTRL	OK	9.0028	11.3746	0.337373	0.0345167	yes
MIER3	20:22297330-22327176	BVDV	CTRL	OK	7.67279	9.69447	0.337411	0.0378989	yes
REV3L	9:39407609-39585149	BVDV	CTRL	OK	5.81191	7.34431	0.337614	0.0273273	yes
ZNF207	19:18123031-18138172	BVDV	CTRL	OK	77.6413	98.129	0.337855	0.0306172	yes
MST4	X:15811929-15878198	BVDV	CTRL	OK	56.3438	71.26	0.338836	0.036994	yes
TMEM64	14:75867173-75908235	BVDV	CTRL	OK	6.77338	8.56742	0.338983	0.0440629	yes
E2F1	13:63704816-63714008	BVDV	CTRL	OK	20.6164	26.0782	0.339055	0.0428223	yes
AGTR1	1:120401469-120445397	BVDV	CTRL	OK	12.4302	15.7333	0.339975	0.0447622	yes
TAF2	14:83551315-83639183	BVDV	CTRL	OK	29.9377	37.8959	0.340077	0.026859	yes
RANBP2	11:44509054-44570848	BVDV	CTRL	OK	22.138	28.0239	0.340134	0.0398771	yes
TTC3	1:151034216-151141015	BVDV	CTRL	OK	12.5523	15.898	0.340889	0.0235986	yes
ATR	1:127469320-127590769	BVDV	CTRL	OK	4.57535	5.7957	0.3411	0.0397674	yes
ZC3H13	12:16082319-16183981	BVDV	CTRL	OK	12.0711	15.2912	0.341141	0.0225653	yes
IPO8	5:79274075-79339685	BVDV	CTRL	OK	13.0444	16.5375	0.342306	0.0373578	yes
MAN2A1	7:111396328-111605058	BVDV	CTRL	OK	27.0071	34.2392	0.342312	0.0257998	yes
SETD5	22:17174693-17217707	BVDV	CTRL	OK	33.9255	43.0141	0.34244	0.0298542	yes
PPP2R5C	21:68377170-68473922	BVDV	CTRL	OK	84.504	107.167	0.342764	0.0492319	yes
PAIP2	7:52252773-52284986	BVDV	CTRL	OK	149.136	189.173	0.343074	0.0373578	yes
EXOC5	10:69862216-69914486	BVDV	CTRL	OK	15.2971	19.4131	0.343774	0.0235985	yes
MAP7D3	X:19826540-19860661	BVDV	CTRL	OK	13.2476	16.8122	0.343777	0.0339014	yes
SNX25	27:14612117-14699712	BVDV	CTRL	OK	18.4949	23.4769	0.344112	0.0371518	yes
AURKB	19:28447632-28452478	BVDV	CTRL	OK	33.5415	42.5771	0.344131	0.0266527	yes
MPHOSPH9	17:54593917-54633789	BVDV	CTRL	OK	17.0583	21.6625	0.344728	0.026859	yes
TSTD2	8:63270040-63297745	BVDV	CTRL	OK	14.4799	18.4038	0.345951	0.0336991	yes
PLK4	17:30185754-30202777	BVDV	CTRL	OK	9.40522	11.9576	0.346396	0.0398771	yes
LOC100849046	3:12975422-13031784	BVDV	CTRL	OK	27.9363	35.5229	0.346606	0.0371518	yes
RAB22A	13:58537700-58585721	BVDV	CTRL	OK	15.5948	19.8398	0.347334	0.04152	yes
MCM10	13:28132566-28170527	BVDV	CTRL	OK	6.7901	8.63858	0.347361	0.0479558	yes
RACGAP1	5:30042570-30060680	BVDV	CTRL	OK	17.5448	22.3258	0.347672	0.0287879	yes
PPIG	2:26695342-26736067	BVDV	CTRL	OK	35.2867	44.9183	0.348178	0.0229618	yes
SATB1	1:157169738-157261755	BVDV	CTRL	OK	40.2648	51.2703	0.348606	0.0223901	yes
TPRKB	11:10862326-10869029	BVDV	CTRL	OK	34.8083	44.3313	0.348893	0.027764	yes
ECT2	1:95475795-95536054	BVDV	CTRL	OK	9.67348	12.3202	0.348916	0.0329287	yes
USP9X	X:107780836-107862546	BVDV	CTRL	OK	16.7947	21.4047	0.349921	0.0287879	yes
ZHX1	14:18126450-18149246	BVDV	CTRL	OK	13.0041	16.5743	0.349976	0.0260189	yes
ZCCHC3	13:61254415-61257121	BVDV	CTRL	OK	23.2453	29.6409	0.350651	0.0264454	yes
PPM1B	11:26402655-26429132	BVDV	CTRL	OK	38.0234	48.4923	0.350869	0.0201535	yes
ERBB2IP	20:13482040-13558286	BVDV	CTRL	OK	36.1306	46.0994	0.351528	0.0378989	yes
LOC100847526	4:113696082-113696784	BVDV	CTRL	OK	172.478	220.074	0.351575	0.0192173	yes
PPP1CB	11:70961029-70997556	BVDV	CTRL	OK	99.6531	127.207	0.352186	0.0354084	yes
FAM105A	20:58634392-58664249	BVDV	CTRL	OK	12.5089	15.9698	0.352392	0.0402226	yes
PLRG1	17:2894753-2912625	BVDV	CTRL	OK	23.0535	29.4393	0.352761	0.0309565	yes
TMEM229B	10:79690914-79713922	BVDV	CTRL	OK	21.5876	27.5685	0.352824	0.0242875	yes
CHD9	18:21622212-21859834	BVDV	CTRL	OK	7.03197	8.98103	0.352951	0.0203825	yes
LOC616942	23:27842252-27846497	BVDV	CTRL	OK	57.5581	73.5137	0.352993	0.0227642	yes
SPEN	16:52882370-52974449	BVDV	CTRL	OK	9.37668	11.9803	0.35352	0.0219605	yes
MIER1	3:78663145-78730912	BVDV	CTRL	OK	21.0471	26.9021	0.354098	0.0215097	yes
CDCA8	3:108785458-108800524	BVDV	CTRL	OK	23.273	29.748	0.354134	0.030028	yes
VPS13B	14:66648395-67459915	BVDV	CTRL	OK	5.49651	7.02914	0.354832	0.0210864	yes
RALGAPA1	21:46202956-46413466	BVDV	CTRL	OK	4.9163	6.28754	0.354924	0.0332928	yes
RFX5	3:19505672-19512106	BVDV	CTRL	OK	16.3768	20.9504	0.355325	0.0235985	yes
SMCHD1	24:37348581-37474495	BVDV	CTRL	OK	21.5222	27.5339	0.355383	0.0221551	yes
APPBP2	19:12751874-12805774	BVDV	CTRL	OK	14.1019	18.0506	0.356157	0.0327456	yes
ELF1	12:11183369-11269367	BVDV	CTRL	OK	59.2239	75.8149	0.356302	0.0257998	yes
CEP192	24:43667272-43734440	BVDV	CTRL	OK	5.21915	6.68323	0.356731	0.028966	yes
DMXL1	7:35981841-36107914	BVDV	CTRL	OK	7.4715	9.56839	0.356878	0.0178144	yes
CNOT1	18:26390036-26473032	BVDV	CTRL	OK	46.2918	59.2933	0.357114	0.0418828	yes
BAG5	21:69843886-69846777	BVDV	CTRL	OK	23.2243	29.75	0.357251	0.0325617	yes
ZBTB24	9:41168309-41177175	BVDV	CTRL	OK	13.4424	17.2215	0.357428	0.0296175	yes
RABGAP1L	16:57525148-57682387	BVDV	CTRL	OK	12.1707	15.5941	0.357594	0.0416884	yes
HECA	9:77890572-77910585	BVDV	CTRL	OK	53.1192	68.069	0.357765	0.0331223	yes
MCM6	2:61821929-61856346	BVDV	CTRL	OK	54.167	69.4226	0.35799	0.0189895	yes
C20H5orf44	20:13856100-13891297	BVDV	CTRL	OK	16.2686	20.8552	0.358313	0.0461969	yes
STAP1	6:85013013-85043207	BVDV	CTRL	OK	11.5867	14.8536	0.358345	0.0452121	yes
NFYB	5:68109726-68232253	BVDV	CTRL	OK	33.8116	43.3494	0.358493	0.0339014	yes
MLL5	4:46437890-46565717	BVDV	CTRL	OK	32.6941	41.9233	0.358724	0.026859	yes
RNF219	12:54102933-54147844	BVDV	CTRL	OK	8.60094	11.0334	0.359315	0.038739	yes
METTL20	5:78647084-78658195	BVDV	CTRL	OK	37.1119	47.6278	0.359925	0.0174091	yes
LUC7L3	19:36622182-36647084	BVDV	CTRL	OK	89.84	115.309	0.360072	0.0231922	yes
ITPR3	23:7687260-7756803	BVDV	CTRL	OK	19.31	24.8007	0.361036	0.0201535	yes
ASF1A	9:32549917-32562773	BVDV	CTRL	OK	29.5586	37.9697	0.36127	0.0452121	yes
CEP350	16:62641889-62776237	BVDV	CTRL	OK	7.63977	9.81871	0.362005	0.0169612	yes
TNRC6B	5:112043300-112172826	BVDV	CTRL	OK	4.78598	6.15316	0.362513	0.0416884	yes
LIG4	12:87606117-87613800	BVDV	CTRL	OK	7.16629	9.21472	0.362713	0.0371518	yes
PUS10	11:43539481-43608487	BVDV	CTRL	OK	11.173	14.3671	0.362753	0.0384723	yes
WAPAL	28:41490894-41568320	BVDV	CTRL	OK	24.8727	31.986	0.362877	0.0164989	yes
CPSF6	5:44765460-44793485	BVDV	CTRL	OK	41.2369	53.0345	0.362994	0.0180422	yes
KIF23	10:16268190-16308715	BVDV	CTRL	OK	9.43337	12.1332	0.363121	0.031951	yes
MTMR10	21:27947772-27984436	BVDV	CTRL	OK	11.6964	15.0451	0.36323	0.032137	yes
NEDD1	5:61446534-61498553	BVDV	CTRL	OK	17.8168	22.9189	0.363299	0.0189895	yes
TOX	14:26631186-26941726	BVDV	CTRL	OK	19.4051	24.9668	0.363572	0.0225653	yes
HIVEP2	9:81236012-81266870	BVDV	CTRL	OK	9.85032	12.6745	0.363687	0.0174091	yes
LOC100849042	14:31801397-31907634	BVDV	CTRL	OK	25.7982	33.2061	0.364177	0.0160094	yes
SOCS5	11:28985137-29053249	BVDV	CTRL	OK	7.01173	9.0258	0.364285	0.0477889	yes
EPB41	2:125014442-125109543	BVDV	CTRL	OK	34.7322	44.7092	0.364295	0.0187455	yes
WEE1	15:43668563-43680715	BVDV	CTRL	OK	20.0265	25.7903	0.364922	0.0199155	yes
MAPK1	17:74016490-74033720	BVDV	CTRL	OK	50.6873	65.2788	0.364992	0.0240704	yes
LOC100848477	2:136362235-136445238	BVDV	CTRL	OK	10.9661	14.124	0.365101	0.0302321	yes
EDEM1	22:21268880-21295366	BVDV	CTRL	OK	22.5645	29.0696	0.365458	0.0167377	yes
RBM14	29:45299518-45308722	BVDV	CTRL	OK	49.9962	64.4096	0.365458	0.0128102	yes
CIT	17:57819704-57990995	BVDV	CTRL	OK	3.4457	4.43909	0.365466	0.0400373	yes
ALMS1	11:10877362-11067103	BVDV	CTRL	OK	3.34542	4.31003	0.365511	0.0242875	yes
TTC17	15:74332059-74459007	BVDV	CTRL	OK	23.249	29.9729	0.366489	0.0143222	yes
ATP2A2	17:56458749-56512895	BVDV	CTRL	OK	24.7368	31.8925	0.366559	0.0162451	yes
FAM13B	7:50959964-51079923	BVDV	CTRL	OK	17.2807	22.2824	0.366742	0.0138276	yes
UTP15	20:7973675-7992443	BVDV	CTRL	OK	6.46479	8.33846	0.367179	0.0420503	yes
C10H5orf13	10:2161054-2193665	BVDV	CTRL	OK	31.3658	40.4568	0.367187	0.0189895	yes
TM7SF3	5:83206161-83245952	BVDV	CTRL	OK	14.9248	19.2616	0.368021	0.0172033	yes
NEK9	10:86727235-86762404	BVDV	CTRL	OK	23.2365	29.9896	0.36807	0.0150533	yes
LOC100296593	19:33853787-33855724	BVDV	CTRL	OK	389.797	503.172	0.368329	0.0409202	yes
CD2AP	23:20596997-20683119	BVDV	CTRL	OK	20.84	26.907	0.368627	0.0143222	yes
CWC25	19:40029604-40039606	BVDV	CTRL	OK	60.2404	77.7946	0.368938	0.0148201	yes
ATAD2B	11:75141458-75263985	BVDV	CTRL	OK	7.59929	9.81667	0.36937	0.0162451	yes
METTL9	25:20310720-20357066	BVDV	CTRL	OK	41.2232	53.2633	0.369686	0.0361873	yes
CDC27	19:46844164-46901634	BVDV	CTRL	OK	14.3214	18.5054	0.369771	0.0133466	yes
SRPK1	23:9751101-9824650	BVDV	CTRL	OK	38.4827	49.7299	0.369902	0.0152528	yes
FMR1	X:30922773-30962111	BVDV	CTRL	OK	18.8048	24.3026	0.370005	0.0143222	yes
ZNF146	18:47044941-47063865	BVDV	CTRL	OK	26.9868	34.8824	0.370249	0.0120531	yes
KDM6A	X:104047123-104252657	BVDV	CTRL	OK	11.1724	14.4411	0.370251	0.0174091	yes
DDX21	28:25376358-25399769	BVDV	CTRL	OK	27.9054	36.0771	0.370538	0.0133466	yes
ADAM10	10:51598072-51739157	BVDV	CTRL	OK	23.5058	30.394	0.37077	0.0148201	yes
LOC535643	3:100674143-100880937	BVDV	CTRL	OK	10.0996	13.0626	0.371137	0.0199155	yes
LOC513555	8:102501863-102627787	BVDV	CTRL	OK	17.7308	22.9342	0.371243	0.0180422	yes
ITGB3	19:46968830-47030716	BVDV	CTRL	OK	9.44384	12.2165	0.371391	0.0172033	yes
PRPF40A	2:43585359-43644578	BVDV	CTRL	OK	28.5974	37.002	0.371716	0.0120531	yes
LOC511617	4:113763389-113768447	BVDV	CTRL	OK	65.3106	84.5053	0.371726	0.0157653	yes
ACOX1	19:56300361-56321420	BVDV	CTRL	OK	14.4155	18.6596	0.372299	0.0385873	yes
ZNF644	3:52450214-52508203	BVDV	CTRL	OK	21.4931	27.8329	0.372915	0.0138276	yes
ABCE1	17:13333860-13446150	BVDV	CTRL	OK	23.5771	30.5339	0.373025	0.0287879	yes
KIAA1432	8:39195273-39338446	BVDV	CTRL	OK	10.8314	14.0284	0.373127	0.0201535	yes
ETF1	7:51470291-51498199	BVDV	CTRL	OK	42.3563	54.8588	0.373146	0.0138276	yes
LYPLAL1	16:23350278-23382371	BVDV	CTRL	OK	8.30984	10.7628	0.373164	0.0463673	yes
ARID2	5:34485601-34699248	BVDV	CTRL	OK	6.77144	8.77245	0.373517	0.0152528	yes
GOLGA4	22:10813997-10923960	BVDV	CTRL	OK	13.4014	17.366	0.37388	0.0104295	yes
MTHFD2	11:10409031-10430853	BVDV	CTRL	OK	24.5615	31.8279	0.373898	0.0285888	yes
LOC514143	3:54345634-54369785	BVDV	CTRL	OK	12.6816	16.4398	0.374461	0.0398771	yes
CKAP5	15:77547958-77653734	BVDV	CTRL	OK	21.1881	27.4704	0.374627	0.0152528	yes
DIDO1	13:54952021-54994530	BVDV	CTRL	OK	11.5065	14.9204	0.374837	0.0107026	yes
FOXO1	12:21915746-22009079	BVDV	CTRL	OK	25.8087	33.4786	0.375382	0.0138276	yes
CPSF2	21:57395845-57429004	BVDV	CTRL	OK	19.6478	25.4892	0.375517	0.0133466	yes
CENPN	18:7734174-7753461	BVDV	CTRL	OK	14.8639	19.2868	0.375802	0.0397674	yes
CLPX	10:12040217-12076459	BVDV	CTRL	OK	18.6666	24.221	0.375803	0.0235985	yes
TTC14	1:87007532-87017223	BVDV	CTRL	OK	27.6299	35.8524	0.375841	0.0120531	yes
ZFP106	10:37886356-37918573	BVDV	CTRL	OK	27.345	35.4989	0.376501	0.0251648	yes
FBXO31	18:12970947-13009263	BVDV	CTRL	OK	22.9882	29.8501	0.376844	0.0118002	yes
HNRNPA3	2:19700798-19706018	BVDV	CTRL	OK	145.085	188.416	0.37702	0.0125717	yes
SLX4	25:2958210-2975115	BVDV	CTRL	OK	17.9972	23.3754	0.377223	0.0138276	yes
ZNF280D	10:53712615-53842021	BVDV	CTRL	OK	9.03535	11.7391	0.377671	0.0174091	yes
NCAPG2	4:120133800-120207828	BVDV	CTRL	OK	11.0248	14.3244	0.377717	0.0167377	yes
FUBP1	3:66969544-66993524	BVDV	CTRL	OK	70.2647	91.3171	0.378084	0.0118002	yes
ARFGEF2	13:77822893-77906708	BVDV	CTRL	OK	9.08082	11.804	0.378386	0.0115338	yes
MPHOSPH8	12:36608004-36653194	BVDV	CTRL	OK	27.9157	36.2994	0.378869	0.01456	yes
LAMP3	1:84536352-84560383	BVDV	CTRL	OK	103.894	135.097	0.378881	0.0176268	yes
MRPL1	6:94337923-94408906	BVDV	CTRL	OK	19.915	25.8999	0.379087	0.0275509	yes
PRIM1	5:57042182-57059973	BVDV	CTRL	OK	16.2589	21.1626	0.380284	0.0377438	yes
FEM1B	10:15080221-15092340	BVDV	CTRL	OK	16.8098	21.8801	0.380316	0.0176268	yes
DIS3L	10:13162026-13194339	BVDV	CTRL	OK	56.6023	73.7036	0.380873	0.0167377	yes
ZBTB33	X:5043332-5050947	BVDV	CTRL	OK	8.17808	10.6515	0.381227	0.0150533	yes
HMMR	7:77271069-77304678	BVDV	CTRL	OK	15.0609	19.6205	0.381552	0.0157653	yes
POU2AF1	15:21951906-21976900	BVDV	CTRL	OK	107.495	140.04	0.381562	0.0210864	yes
TCF4	24:55056408-55161459	BVDV	CTRL	OK	14.6078	19.0337	0.381822	0.0430415	yes
TAB2	9:87759387-87798966	BVDV	CTRL	OK	24.2273	31.575	0.38215	0.0109577	yes
CENPI	X:54969323-55038297	BVDV	CTRL	OK	10.6481	13.8805	0.382461	0.0128102	yes
AFF3	11:4628812-5261285	BVDV	CTRL	OK	11.1825	14.579	0.382645	0.0101625	yes
USP15	5:51379614-51510110	BVDV	CTRL	OK	25.1094	32.7529	0.383399	0.0118002	yes
MASP2	16:43463069-43478362	BVDV	CTRL	OK	12.077	15.7572	0.383749	0.0182757	yes
PCM1	27:18326939-18417973	BVDV	CTRL	OK	11.1121	14.5026	0.384173	0.0135943	yes
DMTF1	4:33347224-33418733	BVDV	CTRL	OK	17.1801	22.4451	0.385659	0.0436159	yes
POLE	17:45511663-45571818	BVDV	CTRL	OK	5.22416	6.82847	0.386364	0.0221551	yes
N4BP1	18:17031948-17096817	BVDV	CTRL	OK	11.6602	15.241	0.386367	0.0130964	yes
SMC5	8:46705568-46824295	BVDV	CTRL	OK	18.2158	23.8158	0.386728	0.0104295	yes
WDR75	2:6875263-6916093	BVDV	CTRL	OK	21.0561	27.5298	0.386754	0.00844743	yes
ELMOD2	17:17477249-17506592	BVDV	CTRL	OK	6.67442	8.72725	0.386884	0.0247279	yes
ADNP2	24:679910-701271	BVDV	CTRL	OK	9.90527	12.954	0.38713	0.0152528	yes
ZC3H7B	5:112955975-113010230	BVDV	CTRL	OK	13.1562	17.2061	0.387177	0.0162451	yes
ARHGEF6	X:20273537-20389008	BVDV	CTRL	OK	40.5429	53.0291	0.387334	0.0109577	yes
BASP1	20:55966891-56022293	BVDV	CTRL	OK	141.986	185.746	0.387584	0.0155258	yes
TOP1	13:70383807-70481490	BVDV	CTRL	OK	50.6637	66.3012	0.388082	0.0123084	yes
DNAJC24	15:62935665-63020363	BVDV	CTRL	OK	16.345	21.3905	0.388119	0.0185367	yes
HERC2	2:646025-878049	BVDV	CTRL	OK	10.1516	13.2858	0.388178	0.0104295	yes
CNOT4	4:99983486-100133488	BVDV	CTRL	OK	7.4439	9.74221	0.388191	0.0495295	yes
METTL3	10:25716676-25731506	BVDV	CTRL	OK	27.3672	35.8169	0.388191	0.0125717	yes
EPS15	3:95389091-95528693	BVDV	CTRL	OK	43.1901	56.5301	0.38832	0.00872462	yes
B3GNT2	11:60654633-60687732	BVDV	CTRL	OK	27.0002	35.3447	0.388525	0.0101625	yes
[truncated: 1,318 more rows]

## Sheet: KEGG_pathways
Category	Term	Count	%	PValue	Genes	List Total	Pop Hits	Pop Total	Fold Enrichment	Bonferroni	Benjamini	FDR
KEGG_PATHWAY	bta04512:ECM-receptor interaction	37	1.38733	2.38792e-11	TNC, COL3A1, ITGB4, ITGA11, ITGB5, VTN, ITGB3, SDC4, SDC2, HMMR, SDC3, LAMB2, ITGAV, COL6A3, COL6A2, COL6A1, AGRN, COL11A2, SPP1, FN1, COL4A2, COL4A1, TNXB, HSPG2, ITGA3, ITGA4, COL5A3, COL4A6, ITGA9, VWF, SDC1, LAMA3, LAMA5, ITGA5, ITGA7, COL1A2, COL1A1	765	75	4940	3.18571	4.2505e-09	4.2505e-09	2.93583e-08
KEGG_PATHWAY	bta04510:Focal adhesion	60	2.24972	4.56888e-09	PDGFB, BCAR1, VTN, PDPK1, PIK3CA, PDGFC, SHC1, COL11A2, BRAF, ROCK2, PIK3CB, FLNC, PPP1CB, FLNA, PRKCB, VEGFB, MAPK1, JUN, MAPK3, PDGFRA, COL1A2, PDGFRB, COL1A1, PARVB, CAV1, XIAP, TNC, COL3A1, ITGB4, ITGA11, ITGB5, ITGB3, MYL9, LAMB2, ITGAV, BCL2, COL6A3, COL6A2, PPP1R12A, COL6A1, PIK3R1, SPP1, FN1, COL4A2, COL4A1, TNXB, IGF1, ITGA3, ITGA4, BAD, CAPN2, COL5A3, COL4A6, KDR, VWF, ITGA9, LAMA3, ITG…	765	182	4940	2.12885	8.13261e-07	4.06631e-07	5.61721e-06
KEGG_PATHWAY	bta04610:Complement and coagulation cascades	32	1.19985	1.07592e-08	C3AR1, C7, A2M, MASP1, MASP2, C3, F13A1, BDKRB1, C1R, C1S, C1QC, FGG, FGB, CFH, C2, CFD, PLAT, C4A, CFB, F8, SERPING1, C1QA, VWF, C1QB, THBD, F5, SERPINF2, F2, TFPI, PROS1, PLAU, F2R	765	71	4940	2.91043	1.91514e-06	6.3838e-07	1.32279e-05
KEGG_PATHWAY	bta04142:Lysosome	41	1.53731	1.07049e-07	SGSH, CTSL2, CLTA, CLTB, ARSG, ATP6AP1, HEXA, LGMN, CTSA, ATP6V0B, GLB1, ATP6V0C, CD68, NAGA, ENTPD4, ATP6V0D1, MAN2B1, ATP6V0D2, IDUA, GBA, LAPTM4B, CTSZ, LIPA, PSAP, GUSB, NAPSA, CD63, CTSW, DNASE2, LAMP1, LAMP2, CTSK, LAMP3, ARSA, GAA, SMPD1, NEU1, CTSC, CTSB, ATP6V0A2, CTSF	765	113	4940	2.34299	1.90546e-05	4.76367e-06	0.000131611
KEGG_PATHWAY	bta05210:Colorectal cancer	30	1.12486	1.08433e-05	APC2, TCF7L1, FOS, KRAS, CASP9, BCL2, PIK3CA, AXIN2, PIK3R1, APC, MSH6, FZD8, BRAF, PIK3CB, MSH2, TGFBR1, TGFBR2, LEF1, SMAD3, SMAD2, BAD, APPL1, FZD5, FZD6, MAPK1, FZD10, JUN, MAPK3, PDGFRA, PDGFRB	765	84	4940	2.30626	0.00192826	0.00038595	0.0133305
KEGG_PATHWAY	bta04670:Leukocyte transendothelial migration	35	1.31234	4.40227e-05	CLDN3, MMP9, BCAR1, CLDN5, CTNND1, CLDN11, MMP2, CXCL12, CDH5, ITGAM, MYL9, CXCR4, PIK3CA, ESAM, RAPGEF3, PIK3R1, F11R, ITK, PIK3CB, ROCK2, CD99, MAPK11, ITGA4, CTNNA1, THY1, PRKCB, PTPN11, CYBA, MAPK12, PLCG1, MAPK13, PECAM1, TXK, JAM2, JAM3	765	112	4940	2.01797	0.00780558	0.00130518	0.0541102
KEGG_PATHWAY	bta05200:Pathways in cancer	73	2.73716	6.25402e-05	E2F1, E2F2, PDGFB, MMP9, PPARG, ARNT2, MMP2, FOS, CASP9, PIK3CA, NOS2, FAS, BRAF, PIK3CB, RXRA, LEF1, FADD, CDK6, CTNNA1, STK4, PRKCB, DAPK1, JUP, VEGFB, SMO, MAPK1, JUN, MAPK3, PDGFRA, PDGFRB, MDM2, TRAF1, FGFR1, XIAP, APC2, TCF7L1, STAT4, LAMB2, KRAS, ITGAV, BCL2, AXIN2, TRAF5, PIK3R1, FN1, CSF1R, APC, CEBPA, MSH6, FZD8, COL4A2, BMP2, COL4A1, EPAS1, MSH2, TGFBR1, CBL, TGFBR2, SMAD3, IGF1, SMAD2…	765	303	4940	1.55577	0.0110708	0.00158909	0.0768628
KEGG_PATHWAY	bta04810:Regulation of actin cytoskeleton	50	1.87477	0.000120777	GNA13, PDGFB, BCAR1, GSN, PIK3CA, RRAS, PDGFC, BRAF, PIK3CB, ROCK2, BAIAP2, ARHGEF6, PPP1CB, MAPK1, RRAS2, MAPK3, F2, PDGFRA, PDGFRB, WASL, FGFR1, APC2, SSH1, SSH2, ITGA11, ITGB4, ITGB5, BDKRB1, ITGB3, ITGAM, MYL9, KRAS, ITGAV, PIKFYVE, PPP1R12A, PIK3R1, APC, FN1, GIT1, ITGA3, ITGA4, ITGA9, ITGA5, ITGA7, CYFIP2, CYFIP1, ITGAD, PIP4K2A, CD14, F2R	765	190	4940	1.69935	0.0212702	0.00268384	0.148388
KEGG_PATHWAY	bta04370:VEGF signaling pathway	24	0.899888	0.000413221	MAPKAPK3, KRAS, CASP9, PLA2G2D4, PPP3CB, NFAT5, PIK3CA, NFATC4, PLA2G2D1, NFATC2, NFATC3, PIK3R1, PIK3CB, SPHK1, MAPK11, BAD, KDR, PRKCB, SH2D2A, MAPK1, PLCG1, MAPK12, MAPK13, MAPK3, HSPB1	765	73	4940	2.12302	0.0709275	0.00814096	0.50685
KEGG_PATHWAY	bta04520:Adherens junction	22	0.824897	0.000787067	PTPRB, FGFR1, PARD3, PTPRM, BAIAP2, TGFBR1, NLK, TGFBR2, CTNND1, LEF1, SMAD3, SMAD2, CTNNA1, SNAI2, TCF7L1, MAPK1, TJP1, MAPK3, PVRL2, WASL, SSX2IP, INSR	765	67	4940	2.12038	0.130775	0.0139175	0.96337
KEGG_PATHWAY	bta04514:Cell adhesion molecules (CAMs)	35	1.31234	0.000861826	PVR, MPZL1, CLDN3, CLDN5, CDH2, CLDN11, SDC4, CDH5, PDCD1, SDC2, ITGAM, SDC3, ALCAM, ITGAV, PVRL2, ESAM, SELPLG, F11R, PTPRM, CD276, CD99, ITGA4, BOLA-DQA1, ITGA9, SIGLEC1, SDC1, CDH15, CD34, PECAM1, VCAN, JAM2, SELE, JAM3, CD226, BOLA-DYB	765	129	4940	1.75204	0.142275	0.013855	1.05443
KEGG_PATHWAY	bta05223:Non-small cell lung cancer	18	0.674916	0.000884033	E2F1, E2F2, BRAF, PIK3CB, RXRA, CDK6, BAD, FOXO3, STK4, PRKCB, MAPK1, PDPK1, KRAS, PLCG1, CASP9, MAPK3, PIK3CA, PIK3R1	765	50	4940	2.32471	0.145661	0.0130333	1.08146
KEGG_PATHWAY	bta05213:Endometrial cancer	17	0.63742	0.001581	APC2, BRAF, PIK3CB, LEF1, BAD, FOXO3, CTNNA1, TCF7L1, MAPK1, PDPK1, KRAS, CASP9, MAPK3, PIK3CA, AXIN2, PIK3R1, APC	765	48	4940	2.28704	0.245455	0.0214317	1.9265
KEGG_PATHWAY	bta05215:Prostate cancer	24	0.899888	0.0033868	E2F1, E2F2, FGFR1, BRAF, PDGFB, PIK3CB, CREB1, IGF1, LEF1, BAD, TCF7L1, MAPK1, PDPK1, HSP90B1, KRAS, CASP9, BCL2, MAPK3, PDGFRA, PIK3CA, MDM2, PDGFRB, PDGFC, PIK3R1	765	84	4940	1.845	0.45331	0.0422168	4.08518
KEGG_PATHWAY	bta04310:Wnt signaling pathway	35	1.31234	0.00484425	APC2, PPP2R5C, MMP7, TCF7L1, PRKX, PPP3CB, NFAT5, NFATC4, PRKACB, SOX17, NFATC2, AXIN2, NFATC3, APC, CSNK1A1, TBL1XR1, FZD8, ROCK2, NLK, LEF1, SMAD3, SMAD2, FZD5, PRKCB, FZD6, SENP2, FZD10, DKK1, SFRP1, SFRP2, JUN, SFRP4, PRICKLE2, PPP2R5E, LRP5	765	142	4940	1.59164	0.578684	0.0559959	5.7955
KEGG_PATHWAY	bta00480:Glutathione metabolism	15	0.56243	0.0061626	ODC1, GCLC, GSTA4, ANPEP, RRM2B, GSS, GPX1, GSTM3, OPLAH, GPX4, GPX3, DNTTIP2, GPX7, GSTP1, MGST1	765	45	4940	2.15251	0.667241	0.0664596	7.31843
KEGG_PATHWAY	bta05214:Glioma	18	0.674916	0.00765477	E2F1, E2F2, BRAF, PDGFB, PIK3CB, IGF1, CDK6, PRKCB, MAPK1, KRAS, PLCG1, MAPK3, PDGFRA, PIK3CA, PDGFRB, MDM2, SHC1, PIK3R1	765	60	4940	1.93725	0.745331	0.0773066	9.01483
KEGG_PATHWAY	bta05412:Arrhythmogenic right ventricular cardiomyopathy (ARVC)	19	0.712411	0.0079555	ITGB4, ITGA11, LMNA, GJA1, LEF1, ITGB5, CACNG4, ITGA3, CDH2, ITGB3, ITGA4, CTNNA1, TCF7L1, JUP, ITGA9, DES, ITGA5, ITGAV, ITGA7	765	65	4940	1.88758	0.758707	0.0759469	9.35324
KEGG_PATHWAY	bta05222:Small cell lung cancer	22	0.824897	0.00841387	TRAF1, E2F1, E2F2, COL4A2, COL4A1, XIAP, PIK3CB, RXRA, CDK6, ITGA3, COL4A6, LAMB2, LAMA3, CASP9, LAMA5, BCL2, ITGAV, PIK3CA, NOS2, TRAF5, PIK3R1, FN1	765	80	4940	1.77582	0.777762	0.0761062	9.86683
KEGG_PATHWAY	bta05212:Pancreatic cancer	19	0.712411	0.0110611	E2F1, E2F2, BRAF, PIK3CB, TGFBR1, ARHGEF6, TGFBR2, SMAD3, CDK6, SMAD2, BAD, STAT1, VEGFB, MAPK1, STAT4, KRAS, CASP9, MAPK3, PIK3CA, PIK3R1	765	67	4940	1.83124	0.861909	0.0942502	12.781
KEGG_PATHWAY	bta05218:Melanoma	18	0.674916	0.0202041	E2F1, FGFR1, E2F2, BRAF, PDGFB, PIK3CB, IGF1, CDK6, BAD, MAPK1, KRAS, MAPK3, PDGFRA, PIK3CA, PDGFRB, MDM2, PDGFC, PIK3R1	765	66	4940	1.76114	0.973567	0.158868	22.1933
KEGG_PATHWAY	bta04010:MAPK signaling pathway	53	1.98725	0.0211985	PDGFB, PRKX, FOS, PLA2G2D4, RRAS, PLA2G2D1, PRKACB, FAS, BRAF, PTPRR, CACNG4, FLNC, STK4, FLNA, PRKCB, MAPK1, RRAS2, JUN, GADD45G, MAPK3, PDGFRA, PDGFRB, HSPB1, STMN1, MAP3K11, FGFR1, MAPKAPK3, HSPA1A, PPM1B, ATF2, TNFRSF1A, KRAS, RASGRP3, MAP3K2, ELK4, RASGRP4, RASGRP1, PPP3CB, NFATC4, NFATC2, RASA2, TAOK1, NLK, TGFBR1, TGFBR2, NR4A1, MAPK11, TAB1, TAB2, RPS6KA6, MAPK12, MAPK13, CACNA1H, CD14	765	257	4940	1.33171	0.977938	0.159164	23.1586
KEGG_PATHWAY	bta04660:T cell receptor signaling pathway	25	0.937383	0.0280925	PDCD1, FOS, KRAS, RASGRP1, NFAT5, PPP3CB, PIK3CA, NFATC4, NFATC2, NFATC3, PIK3R1, DLG1, PDK1, ITK, PIK3CB, CBL, MALT1, MAPK11, MAPK1, CBLB, MAPK12, MAPK13, JUN, MAPK3, GRAP2	765	105	4940	1.5375	0.99373	0.197901	29.5542
KEGG_PATHWAY	bta04062:Chemokine signaling pathway	36	1.34983	0.0451241	PARD3, CCL2, FGR, BCAR1, CCR1, CXCL9, FOXO3, CXCR3, CXCL12, PRKX, CCL22, STAT4, KRAS, CXCR4, CXCR6, CCR10, PIK3CA, SHC1, PRKACB, PIK3R1, ITK, BRAF, PIK3CB, ROCK2, HCK, STAT1, CCL16, CCL17, PRKCB, MAPK1, CCR7, CCL14, CCR4, CXCL16, MAPK3, WASL, GRK5	765	171	4940	1.35948	0.999731	0.289976	43.3164
KEGG_PATHWAY	bta04620:Toll-like receptor signaling pathway	22	0.824897	0.0477837	PIK3CB, TOLLIP, CXCL9, TLR3, TLR4, FADD, MAPK11, STAT1, TAB1, TAB2, FOS, MAPK1, STAT4, IRF5, MAPK12, MAPK13, JUN, MAPK3, PIK3CA, LBP, CD14, PIK3R1, SPP1	765	94	4940	1.51133	0.999836	0.294337	45.2272
KEGG_PATHWAY	bta05219:Bladder cancer	11	0.412448	0.0494885	E2F1, VEGFB, MAPK1, E2F2, KRAS, BRAF, MMP9, MAPK3, MDM2, MMP2, DAPK1	765	37	4940	1.9198	0.999881	0.293531	46.4207
KEGG_PATHWAY	bta00520:Amino sugar and nucleotide sugar metabolism	12	0.449944	0.0498455	PGM2, CYB5R3, GALK1, PGM3, RENBP, AMDHD2, NANS, GMDS, HEXA, GFPT2, NPL, NAGK	765	42	4940	1.845	0.999888	0.286151	46.6676
KEGG_PATHWAY	bta04270:Vascular smooth muscle contraction	24	0.899888	0.0531372	GNA13, MRVI1, KCNMB1, PRKX, MYL9, ACTG2, AGTR1, PLA2G2D4, PPP1R12A, PRKACB, PLA2G2D1, CALCRL, RAMP1, PPP1R14A, KCNMA1, RAMP2, BRAF, ACTA2, ROCK2, NPR1, ITPR3, PPP1CB, PRKCB, MAPK1, MAPK3, GUCY1B3	765	106	4940	1.46208	0.99994	0.29327	48.8953
KEGG_PATHWAY	bta04350:TGF-beta signaling pathway	19	0.712411	0.0539016	BMP2, ACVRL1, RBL2, ROCK2, TGFBR1, SMAD6, TGFBR2, RBL1, SMAD3, SMAD2, DCN, SMAD1, MAPK1, SP1, ID1, ZFYVE16, MAPK3, ID3, ACVR1	765	79	4940	1.55307	0.999948	0.288297	49.4002
KEGG_PATHWAY	bta05220:Chronic myeloid leukemia	18	0.674916	0.0559921	E2F1, E2F2, BRAF, PIK3CB, TGFBR1, CBL, TGFBR2, CDK6, BAD, PTPN11, MAPK1, CBLB, KRAS, MAPK3, MDM2, PIK3CA, SHC1, PIK3R1	765	74	4940	1.57075	0.999965	0.289569	50.7577
KEGG_PATHWAY	bta04621:NOD-like receptor signaling pathway	14	0.524934	0.0561807	CCL2, CARD9, XIAP, IL18, MAPK11, TAB1, TAB2, MAPK1, HSP90B1, MAPK12, ERBB2IP, MAPK13, MAPK3, TRIP6	765	53	4940	1.70576	0.999966	0.282514	50.8786
KEGG_PATHWAY	bta04914:Progesterone-mediated oocyte maturation	19	0.712411	0.0664441	ANAPC1, BRAF, PIK3CB, PDE3B, IGF1, MAPK11, CDC27, PRKX, CCNB1, MAPK1, RPS6KA6, KRAS, MAPK12, MAPK13, MAPK3, BUB1, PIK3CA, PRKACB, PIK3R1	765	81	4940	1.51473	0.999995	0.31781	57.0572
KEGG_PATHWAY	bta00250:Alanine, aspartate and glutamate metabolism	9	0.337458	0.067469	GLUL, ASPA, ASS1, ALDH5A1, GLS, GFPT2, ALDH4A1, DDO, GPT2	765	29	4940	2.00406	0.999996	0.313935	57.6333
KEGG_PATHWAY	bta04114:Oocyte meiosis	24	0.899888	0.0694061	ANAPC1, YWHAZ, SGOL1, PPP2R5C, IGF1, ESPL1, ITPR3, PPP1CB, CDC27, PRKX, SMC3, CCNB1, MAPK1, RPS6KA6, YWHAG, SLK, MAPK12, MAPK3, BUB1, PPP3CB, STAG3, PPP2R5E, PRKACB, SMC1A	765	109	4940	1.42184	0.999997	0.3138	58.7026
KEGG_PATHWAY	bta00590:Arachidonic acid metabolism	14	0.524934	0.0724801	TBXAS1, ALOX12E, PTGS1, LTC4S, CBR3, GPX1, PTGIS, PTGDS, PTGES, PLA2G2D4, GPX4, GPX3, ALOX5, GPX7, PLA2G2D1	765	55	4940	1.64373	0.999998	0.317951	60.3488
KEGG_PATHWAY	bta04210:Apoptosis	19	0.712411	0.0734051	XIAP, PIK3CB, FADD, BAD, CAPN2, PRKX, ATM, TNFRSF1A, TNFSF10, CASP9, PRKAR1B, CASP7, BCL2, PPP3CB, EXOG, PIK3CA, PRKACB, FAS, PIK3R1	765	82	4940	1.49625	0.999999	0.314056	60.8323
KEGG_PATHWAY	bta04115:p53 signaling pathway	15	0.56243	0.0785712	ZMAT3, IGF1, CDK6, RRM2B, ATR, ATM, SESN3, CCNB1, CASP9, SHISA5, GADD45G, MDM2, MDM4, FAS, IGFBP3	765	61	4940	1.58791	1	0.325422	63.4342
KEGG_PATHWAY	bta04960:Aldosterone-regulated sodium reabsorption	11	0.412448	0.078633	MAPK1, PDPK1, KRAS, PIK3CB, MAPK3, PIK3CA, IGF1, SLC9A3R2, INSR, PIK3R1, PRKCB	765	40	4940	1.77582	1	0.318611	63.4643
KEGG_PATHWAY	bta03320:PPAR signaling pathway	16	0.599925	0.0840125	CPT1C, ACOX1, OLR1, SCD, RXRA, PPARG, PCK2, ADIPOQ, PDPK1, APOA1, CYP27A1, PLIN1, SCD5, ACAA1, NR1H3, ANGPTL4	765	67	4940	1.54209	1	0.330023	66.0022
KEGG_PATHWAY	bta04150:mTOR signaling pathway	13	0.487439	0.0847205	CAB39L, BRAF, PIK3CB, IGF1, DDIT4, VEGFB, MAPK1, RPS6KA6, PDPK1, EIF4EBP1, MAPK3, PIK3CA, PIK3R1	765	51	4940	1.64603	1	0.325605	66.3238
KEGG_PATHWAY	bta04110:Cell cycle	26	0.974878	0.0865536	E2F1, E2F2, YWHAZ, BUB1, STAG2, ANAPC1, RBL2, RBL1, SMAD3, CDK6, SMAD2, ESPL1, ATR, CDC27, WEE1, ATM, SMC3, MCM6, CCNB1, CDKN1C, YWHAG, GADD45G, MDM2, BUB1B, TOM1, SMC1A	765	123	4940	1.365	1	0.324995	67.1438
KEGG_PATHWAY	bta00511:Other glycan degradation	6	0.224972	0.0876054	HEXA, NEU1, MAN2B1, NEU3, GBA, GLB1	765	16	4940	2.42157	1	0.321968	67.6059
KEGG_PATHWAY	bta01040:Biosynthesis of unsaturated fatty acids	7	0.262467	0.0927091	ACOX1, ELOVL5, SCD, YOD1, ELOVL6, SCD5, ACAA1	765	21	4940	2.15251	1	0.331517	69.7646
KEGG_PATHWAY	bta04320:Dorso-ventral axis formation	7	0.262467	0.0927091	MAPK1, KRAS, ETS1, ETS2, NOTCH4, MAPK3, SPIRE2	765	21	4940	2.15251	1	0.331517	69.7646
KEGG_PATHWAY	bta05216:Thyroid cancer	8	0.299963	0.0943592	MAPK1, KRAS, BRAF, RXRA, PPARG, MAPK3, LEF1, TCF7L1	765	26	4940	1.98693	1	0.33032	70.4338
KEGG_PATHWAY	bta00330:Arginine and proline metabolism	13	0.487439	0.0954229	ODC1, GATM, ASS1, MAOA, MAOB, CKB, ABP1, GLUL, P4HA2, GLS, ALDH4A1, NOS3, NOS2	765	52	4940	1.61438	1	0.32746	70.8579

## Sheet: functional_clusters
Annotation Cluster 1	Enrichment Score: 16.217371043788646
Category	Term	Count	%	PValue	Genes	List Total	Pop Hits	Pop Total	Fold Enrichment	Bonferroni	Benjamini	FDR
UP_SEQ_FEATURE	signal peptide	254	9.52381	2.00138e-22	RARRES2, EFNA1, PTGS1, BTC, EDN1, FSTL1, LPHN2, OGN, DNAJB11, APOD, PLOD1, APOE, CTGF, CFH, VNN1, FAS, PI16, CFD, LPHN1, F11R, OLFML2B, SSLP1, SERPING1, PIK3IP1, SIRPA, TMEM150B, PRELP, C1QA, VEGFB, C1QB, RETN, CCR7, NPC2, F5, SERPINF1, SERPINF2, F2, ADAMTS2, ADAMTS4, BOLA-DYB, GC, CTSL2, SCN1B, CRELD2, ELN, PTH1R, MANF, ALCAM, LGALS3BP, PROCR, NAGA, FGL2, FGL1, SERPINA3-1, TYROBP, SPP1, PLAT, CF…	873	960	5635	1.70782	4.70524e-19	4.70524e-19	3.50596e-19
UP_SEQ_FEATURE	glycosylation site:N-linked (GlcNAc...)	249	9.33633	1.51797e-20	A2M, ADORA3, EFNA1, BTC, PTGS1, FSTL1, AQP1, AQP3, LPHN2, OGN, AGTR1, DNAJB11, APOD, PLOD1, LTB4R, CFH, VNN1, ERAP2, FAS, PI16, ITFG3, LPHN1, PLD3, F11R, C4A, OLFML2B, SSLP1, SERPING1, COLEC12, SIRPA, TMEM150B, PRELP, C1QA, CCR7, NPC2, GPBAR1, F5, SERPINF1, SERPINF2, F2, EXT1, ADAMTS2, ADAMTS4, GC, TPST2, CTSL2, SCN1B, CRELD2, PTH1R, KCNMB1, ALCAM, LGALS3BP, PROCR, NAGA, FGL2, LFNG, SERPINA3-1, S…	873	961	5635	1.67246	3.56874e-17	1.78437e-17	2.65914e-17
GOTERM_CC_FAT	GO:0005576~extracellular region	219	8.21147	1.55906e-18	RARRES2, A2M, BTC, EDN1, FSTL1, POSTN, NOV, OGN, ISG15, APOD, APOE, CTGF, CFH, FAS, PI16, CFD, MATN2, C4A, OLFML2B, SSLP1, SERPING1, PRELP, VEGFB, C1QA, C1QB, RETN, NPC2, F5, SERPINF1, SERPINF2, F2, TFPI, WFDC1, ADAMTS1, ADAMTS2, ADAMTS4, GC, RBP4, CRELD2, ELN, MANF, LGALS3BP, LAMB2, FGL2, AGRN, FGL1, LAMB1, SERPINA3-1, SPP1, COL18A1, PLAT, MGAT4A, BMP2, CFB, LGALS1, IL1RN, CHI3L1, CCDC80, ECM1, …	997	892	6966	1.71541	6.68837e-16	3.34419e-16	2.19673e-15
SP_PIR_KEYWORDS	glycoprotein	273	10.2362	1.0933e-17	A2M, ADORA3, EFNA1, PTGS1, BTC, FSTL1, AQP1, AQP3, LPHN2, OGN, AGTR1, APOD, PLOD1, DNAJB11, LTB4R, CFH, VNN1, ERAP2, FAS, PI16, ITFG3, TPSB1, LPHN1, PLD3, F11R, C4A, OLFML2B, SSLP1, COLEC12, SERPING1, SIRPA, TMEM150B, PRELP, C1QA, VEGFB, C1QB, CCR7, NPC2, GPBAR1, F5, SERPINF1, SERPINF2, F2, PMP22, EXT1, ADAMTS2, ADAMTS4, GC, TPST2, CTSL2, SCN1B, CRELD2, PTH1R, KCNMB1, ALCAM, LGALS3BP, PROCR, NAGA…	1215	1048	7349	1.57563	5.54303e-15	5.54303e-15	1.57747e-14
SP_PIR_KEYWORDS	signal	254	9.52381	2.65999e-17	RARRES2, EFNA1, PTGS1, BTC, EDN1, FSTL1, LPHN2, OGN, DNAJB11, APOD, PLOD1, APOE, CTGF, CFH, VNN1, FAS, PI16, CFD, LPHN1, F11R, OLFML2B, SSLP1, SERPING1, PIK3IP1, SIRPA, TMEM150B, PRELP, C1QA, VEGFB, C1QB, RETN, CCR7, NPC2, F5, SERPINF1, SERPINF2, F2, ADAMTS2, ADAMTS4, BOLA-DYB, GC, CTSL2, SCN1B, CRELD2, ELN, PTH1R, MANF, ALCAM, LGALS3BP, PROCR, NAGA, FGL2, FGL1, SERPINA3-1, TYROBP, SPP1, PLAT, CF…	1215	960	7349	1.60035	1.34862e-14	6.74308e-15	3.83799e-14
UP_SEQ_FEATURE	disulfide bond	197	7.38658	2.18261e-15	A2M, ADORA3, EFNA1, BTC, EDN1, PTGS1, FSTL1, LPHN2, AGTR1, OGN, APOD, CTGF, CFH, FAS, CFD, LPHN1, F11R, C4A, OLFML2B, SSLP1, SERPING1, COLEC12, PIK3IP1, SIRPA, PRELP, VEGFB, C1QA, RETN, C1QB, CCR7, NPC2, F5, GPBAR1, SERPINF2, F2, ADAMTS2, ADAMTS4, GC, RBP4, CTSL2, SCN1B, CRELD2, ELN, PTH1R, MANF, ALCAM, LGALS3BP, PROCR, NAGA, COX6B1, FGL1, PLAT, CFB, TGFBR1, IL1RN, CHI3L1, SFRP1, PLAU, MSR1, GPR1…	873	764	5635	1.66438	5.22027e-12	1.74005e-12	3.88578e-12
SP_PIR_KEYWORDS	disulfide bond	206	7.72403	2.75211e-12	A2M, ADORA3, EFNA1, BTC, EDN1, PTGS1, FSTL1, LPHN2, OGN, AGTR1, DNAJB11, APOD, CTGF, CFH, FAS, CFD, LPHN1, F11R, C4A, OLFML2B, SSLP1, SERPING1, COLEC12, PIK3IP1, SIRPA, PRELP, VEGFB, C1QA, C1QB, RETN, CCR7, NPC2, F5, GPBAR1, SERPINF2, F2, ADAMTS2, ADAMTS4, GC, RBP4, CTSL2, SCN1B, CRELD2, ELN, PTH1R, MANF, ALCAM, LGALS3BP, PROCR, NAGA, COX6B1, FGL2, FGL1, TYROBP, PLAT, CFB, TGFBR1, IL1RN, CHI3L1, …	1215	802	7349	1.55362	1.39533e-09	4.6511e-10	3.97093e-09
SP_PIR_KEYWORDS	Secreted	158	5.92426	2.20452e-11	RARRES2, A2M, S100A8, EFNA1, IL18, F13A1, MMP9, BTC, EDN1, S100A9, PGLYRP1, FSTL1, MMP2, TTR, OGN, OLFML3, APOA1, ISG15, APOD, APOE, CTGF, CFH, DEFB10, CFD, TFPI2, SPON1, COCH, C4A, OLFML2B, CA11, CST3, SSLP1, MGP, SERPING1, TCN2, PRELP, C1QA, VEGFB, RETN, C1QB, PDDC1, NPC2, CHID1, F5, SERPINF1, CPE, SERPINF2, F2, COL1A2, MFAP2, PGCP, COL1A1, MFAP4, MFAP5, ADAMTS2, ADAMTS4, GC, XDH, RBP4, CRELD2,…	1215	583	7349	1.63923	1.11769e-08	2.79424e-09	3.18081e-08
Annotation Cluster 2	Enrichment Score: 14.060296904897402
Category	Term	Count	%	PValue	Genes	List Total	Pop Hits	Pop Total	Fold Enrichment	Bonferroni	Benjamini	FDR
GOTERM_CC_FAT	GO:0031012~extracellular matrix	73	2.73716	2.92819e-18	MMP9, MMP7, VTN, POSTN, MMP3, MMP2, OGN, GPC2, GPC3, CTGF, SPINT2, VWA1, COL11A2, GPC1, LOXL1, GFOD2, SPON1, MATN2, SPARCL1, OLFML2B, MMP19, MMP14, PRELP, BGN, COL1A2, MFAP2, ADAMTS1, VCAN, COL1A1, MFAP4, MFAP5, ADAMTS2, ADAMTS4, FMOD, LUM, COL3A1, ELN, DCN, TIMP2, TIMP3, TIMP1, SMOC2, LGALS3BP, LAMB2, CRISPLD2, COL27A1, COL6A2, AGRN, ENTPD1, LAMB1, DPT, ANGPTL4, FN1, COL18A1, COL4A2, COL4A1, TNX…	997	178	6966	2.86544	1.25619e-15	4.18731e-16	4.12584e-15
GOTERM_CC_FAT	GO:0005578~proteinaceous extracellular matrix	66	2.47469	4.21535e-16	MMP9, MMP7, VTN, POSTN, MMP3, MMP2, OGN, GPC2, GPC3, CTGF, COL11A2, VWA1, GPC1, GFOD2, SPON1, MATN2, SPARCL1, MMP19, MMP14, PRELP, BGN, COL1A2, ADAMTS1, VCAN, MFAP2, COL1A1, MFAP4, MFAP5, ADAMTS2, ADAMTS4, FMOD, LUM, COL3A1, ELN, DCN, TIMP2, TIMP3, TIMP1, SMOC2, LGALS3BP, LAMB2, COL27A1, AGRN, LAMB1, ENTPD1, ANGPTL4, FN1, DPT, COL4A2, COL4A1, TNXB, LGALS1, FBN1, CCDC80, HSPG2, NID1, SPARC, NID2, …	997	163	6966	2.82908	1.90514e-13	4.76286e-14	6.21725e-13
SP_PIR_KEYWORDS	extracellular matrix	39	1.46232	5.34167e-10	FMOD, MMP9, LUM, ELN, COL3A1, DCN, TIMP2, MMP2, TIMP3, TIMP1, OGN, LGALS3BP, CTGF, COL11A2, VWA1, GFOD2, SPP1, FN1, ANGPTL4, DPT, SPON1, COL4A2, COL4A1, TNXB, LGALS1, FBN1, SPARC, PRELP, ANXA2, VWF, BGN, COL1A2, VCAN, MFAP2, COL1A1, MFAP4, ADAMTS2, MFAP5, ADAMTS4	1215	84	7349	2.80826	2.70822e-07	5.41645e-08	7.70726e-07
Annotation Cluster 3	Enrichment Score: 7.246767479148052
Category	Term	Count	%	PValue	Genes	List Total	Pop Hits	Pop Total	Fold Enrichment	Bonferroni	Benjamini	FDR
GOTERM_BP_FAT	GO:0051270~regulation of cell motion	33	1.23735	2.42172e-10	ADORA3, PDGFB, MMP9, CSF1, PAX6, ITGB3, CXCL12, ADA, APOE, CXCR4, BCL2, TEK, RRAS, TIE1, INSR, PIK3R1, APC, B4GALT1, ADAM10, TGFBR1, IGF1, KDR, THY1, CDH13, LAMA3, LAMA5, CXCL16, DLL4, RRAS2, PECAM1, TRIP6, IGFBP5, F2R	1260	70	8785	3.2869	8.27745e-07	2.75915e-07	4.42407e-07
GOTERM_BP_FAT	GO:0030334~regulation of cell migration	31	1.16235	2.5337e-10	ADORA3, PDGFB, MMP9, CSF1, PAX6, ITGB3, CXCL12, ADA, APOE, CXCR4, BCL2, TEK, RRAS, TIE1, INSR, PIK3R1, APC, ADAM10, IGF1, KDR, THY1, CDH13, LAMA3, LAMA5, CXCL16, DLL4, RRAS2, PECAM1, TRIP6, IGFBP5, F2R	1260	63	8785	3.43078	8.66019e-07	2.16505e-07	4.62864e-07
GOTERM_BP_FAT	GO:0040012~regulation of locomotion	33	1.23735	1.38995e-09	ADORA3, PDGFB, MMP9, CSF1, SNCA, PAX6, ITGB3, CXCL12, ADA, CXCR4, APOE, BCL2, TEK, RRAS, TIE1, INSR, PIK3R1, SCG2, APC, ADAM10, IGF1, KDR, THY1, CDH13, LAMA3, LAMA5, CXCL16, DLL4, RRAS2, PECAM1, TRIP6, IGFBP5, F2R	1260	74	8785	3.10923	4.75085e-06	7.9181e-07	2.53921e-06
GOTERM_BP_FAT	GO:0051272~positive regulation of cell motion	17	0.63742	4.9388e-06	ADAM10, ADORA3, TGFBR1, CSF1, MMP9, IGF1, CXCL12, KDR, CDH13, RRAS2, CXCL16, BCL2, TRIP6, INSR, PIK3R1, APC, F2R	1260	34	8785	3.48611	0.0167392	0.0010545	0.00902195
GOTERM_BP_FAT	GO:0030335~positive regulation of cell migration	16	0.599925	6.36498e-06	ADAM10, ADORA3, CSF1, MMP9, IGF1, CXCL12, KDR, CDH13, RRAS2, CXCL16, BCL2, TRIP6, INSR, PIK3R1, APC, F2R	1260	31	8785	3.59857	0.0215206	0.00108719	0.0116271
GOTERM_BP_FAT	GO:0040017~positive regulation of locomotion	17	0.63742	1.23338e-05	ADAM10, ADORA3, CSF1, MMP9, IGF1, CXCL12, KDR, CDH13, RRAS2, CXCL16, BCL2, TRIP6, INSR, PIK3R1, F2R, SCG2, APC	1260	36	8785	3.29244	0.0412808	0.00191439	0.0225292
Annotation Cluster 4	Enrichment Score: 6.754871100792922
Category	Term	Count	%	PValue	Genes	List Total	Pop Hits	Pop Total	Fold Enrichment	Bonferroni	Benjamini	FDR
GOTERM_CC_FAT	GO:0005773~vacuole	39	1.46232	3.60677e-08	CTSL2, RAB7B, EPDR1, NAAA, ATP6AP1, LGMN, HEXA, GJA1, CTSA, ADA, ATP6V0B, C3H1ORF85, GLB1, PLBD2, ATP6V0C, MAP1LC3A, NAGA, MAN2B1, ATP6V0D2, GBA, CTSZ, PSAP, RNASE6, STXBP2, CD63, DNASE2, MARCH2, LAMP1, LAMP2, CTSK, LAMP3, CHID1, SMPD1, GAA, ARSA, NEU1, CTSC, CTSB, CLCN7	997	108	6966	2.52307	1.54729e-05	2.21043e-06	5.08197e-05
GOTERM_CC_FAT	GO:0005764~lysosome	34	1.27484	9.27659e-08	CTSL2, RAB7B, EPDR1, NAAA, LGMN, HEXA, GJA1, CTSA, ADA, C3H1ORF85, GLB1, PLBD2, NAGA, MAN2B1, GBA, CTSZ, PSAP, RNASE6, STXBP2, CD63, DNASE2, MARCH2, LAMP1, LAMP2, CTSK, LAMP3, CHID1, SMPD1, GAA, ARSA, NEU1, CTSC, CTSB, CLCN7	997	90	6966	2.63952	3.97958e-05	4.42183e-06	0.000130708
GOTERM_CC_FAT	GO:0000323~lytic vacuole	34	1.27484	9.27659e-08	CTSL2, RAB7B, EPDR1, NAAA, LGMN, HEXA, GJA1, CTSA, ADA, C3H1ORF85, GLB1, PLBD2, NAGA, MAN2B1, GBA, CTSZ, PSAP, RNASE6, STXBP2, CD63, DNASE2, MARCH2, LAMP1, LAMP2, CTSK, LAMP3, CHID1, SMPD1, GAA, ARSA, NEU1, CTSC, CTSB, CLCN7	997	90	6966	2.63952	3.97958e-05	4.42183e-06	0.000130708
KEGG_PATHWAY	bta04142:Lysosome	41	1.53731	1.07049e-07	SGSH, CTSL2, CLTA, CLTB, ARSG, ATP6AP1, HEXA, LGMN, CTSA, ATP6V0B, GLB1, ATP6V0C, CD68, NAGA, ENTPD4, ATP6V0D1, MAN2B1, ATP6V0D2, IDUA, GBA, LAPTM4B, CTSZ, LIPA, PSAP, GUSB, NAPSA, CD63, CTSW, DNASE2, LAMP1, LAMP2, CTSK, LAMP3, ARSA, GAA, SMPD1, NEU1, CTSC, CTSB, ATP6V0A2, CTSF	765	113	4940	2.34299	1.90546e-05	4.76367e-06	0.000131611
SP_PIR_KEYWORDS	lysosome	27	1.01237	5.06018e-06	CTSL2, RAB7B, LGMN, HEXA, CTSA, PLBD2, GLB1, C3H1ORF85, NAGA, MAN2B1, GBA, CTSZ, PSAP, RNASE6, CD63, DNASE2, LAMP1, MARCH2, CTSK, CHID1, SMPD1, GAA, ARSA, CTSC, NEU1, CTSB, CLCN7	1215	65	7349	2.51248	0.00256223	0.000285017	0.00730086
Annotation Cluster 5	Enrichment Score: 6.29480206544862
Category	Term	Count	%	PValue	Genes	List Total	Pop Hits	Pop Total	Fold Enrichment	Bonferroni	Benjamini	FDR
GOTERM_BP_FAT	GO:0001568~blood vessel development	41	1.53731	5.92097e-08	CAV1, ACVRL1, IL18, DICER1, EDN1, COL3A1, GJA1, ANPEP, ELK3, CDH2, GJA4, MMP2, CXCL12, CDH5, GPX1, CTGF, APOE, CXCR4, ITGAV, QKI, SOX18, NOS3, NR2F2, SCG2, CYR61, ANGPTL4, B4GALT1, EPAS1, TGFBR1, ITGA4, KDR, THY1, ANXA2, CDH13, MEOX2, DLL4, ECSCR, COL1A2, COL1A1, POFUT1, ACVR1	1260	118	8785	2.42255	0.000202358	2.02377e-05	0.000108166
GOTERM_BP_FAT	GO:0001944~vasculature development	41	1.53731	1.28999e-07	CAV1, ACVRL1, IL18, DICER1, EDN1, COL3A1, GJA1, ANPEP, ELK3, CDH2, GJA4, MMP2, CXCL12, CDH5, GPX1, CTGF, APOE, CXCR4, ITGAV, QKI, SOX18, NOS3, NR2F2, SCG2, CYR61, ANGPTL4, B4GALT1, EPAS1, TGFBR1, ITGA4, KDR, THY1, ANXA2, CDH13, MEOX2, DLL4, ECSCR, COL1A2, COL1A1, POFUT1, ACVR1	1260	121	8785	2.36249	0.00044082	4.00826e-05	0.000235658
GOTERM_BP_FAT	GO:0048514~blood vessel morphogenesis	34	1.27484	1.30289e-06	CAV1, ACVRL1, IL18, DICER1, EDN1, GJA1, ANPEP, ELK3, CDH2, CXCL12, GPX1, APOE, CXCR4, CTGF, QKI, SOX18, NOS3, NR2F2, SCG2, ANGPTL4, CYR61, B4GALT1, EPAS1, TGFBR1, ITGA4, KDR, THY1, ANXA2, CDH13, MEOX2, DLL4, ECSCR, POFUT1, ACVR1	1260	99	8785	2.3945	0.00444337	0.00031804	0.00238012
GOTERM_BP_FAT	GO:0001525~angiogenesis	25	0.937383	6.65131e-06	ACVRL1, IL18, EDN1, DICER1, ANPEP, ELK3, CXCL12, GPX1, CXCR4, CTGF, NOS3, SOX18, ANGPTL4, CYR61, SCG2, B4GALT1, EPAS1, ANXA2, THY1, CDH13, MEOX2, DLL4, ECSCR, POFUT1, ACVR1	1260	66	8785	2.64099	0.0224778	0.001082	0.0121501
Annotation Cluster 6	Enrichment Score: 6.000255053455229
Category	Term	Count	%	PValue	Genes	List Total	Pop Hits	Pop Total	Fold Enrichment	Bonferroni	Benjamini	FDR
GOTERM_MF_FAT	GO:0043169~cation binding	461	17.2853	7.69152e-11	ZNF389, MASP1, CYP2D14, PTGS1, FSTL1, ITSN2, FAH, DDAH1, PLS3, ZNF644, ROCK2, RXRA, ZNF507, ZHX1, F8, COLEC12, SPIRE2, CYP1A2, NAPEPLD, F5, ZNF784, F2, ZNHIT1, ZZZ3, ADAMTS1, CHORDC1, ADAMTS2, ADAMTS4, ZNF614, SCN1B, AHCY, CYP51A1, DIDO1, ARIH1, NAGA, ZNF70, GPD2, GIT1, MGAT4A, ZC3H13, PTGR1, KLF12, TGFBR1, ATP11B, PCDH12, ATP11A, ZNF521, KLF15, ATP11C, ZNF627, ZNF628, GAS6, BFAR, KCNJ8, TRPS1, Z…	1384	2415	9249	1.27568	8.18378e-08	8.18378e-08	1.22485e-07
GOTERM_MF_FAT	GO:0043167~ion binding	463	17.3603	1.64845e-10	ZNF389, MASP1, CYP2D14, PTGS1, FSTL1, ITSN2, FAH, DDAH1, PLS3, ZNF644, ROCK2, RXRA, ZNF507, ZHX1, F8, COLEC12, SPIRE2, CYP1A2, NAPEPLD, F5, ZNF784, F2, ZNHIT1, ZZZ3, ADAMTS1, CHORDC1, ADAMTS2, ADAMTS4, ZNF614, SCN1B, AHCY, CYP51A1, DIDO1, ARIH1, NAGA, ZNF70, GPD2, GIT1, MGAT4A, ZC3H13, PTGR1, KLF12, TGFBR1, ATP11B, PCDH12, ATP11A, ZNF521, KLF15, ATP11C, ZNF627, ZNF628, GAS6, BFAR, KCNJ8, TRPS1, Z…	1384	2439	9249	1.26861	1.75395e-07	8.76974e-08	2.62509e-07
GOTERM_MF_FAT	GO:0046872~metal ion binding	453	16.9854	3.2785e-10	MASP1, ZNF389, CYP2D14, PTGS1, FSTL1, ITSN2, FAH, DDAH1, PLS3, ZNF644, ROCK2, RXRA, ZNF507, ZHX1, F8, COLEC12, SPIRE2, CYP1A2, NAPEPLD, F5, ZNF784, F2, ZNHIT1, ZZZ3, ADAMTS1, CHORDC1, ADAMTS2, ADAMTS4, ZNF614, SCN1B, AHCY, CYP51A1, DIDO1, ARIH1, ZNF70, GPD2, GIT1, MGAT4A, ZC3H13, PTGR1, KLF12, TGFBR1, ATP11B, PCDH12, ATP11A, ZNF521, KLF15, ATP11C, ZNF627, ZNF628, GAS6, BFAR, KCNJ8, TRPS1, ZNF385B…	1384	2387	9249	1.26825	3.48832e-07	1.16277e-07	5.22088e-07
GOTERM_MF_FAT	GO:0046914~transition metal ion binding	309	11.5861	3.66056e-05	CYP3A4, ALAD, DZIP3, PDLIM7, ZNF389, CYP2D14, PDLIM4, PTGS1, PDLIM2, PDLIM1, EPT1, RNF215, G2E3, PLOD1, PLOD2, ERAP2, SCD5, DDAH1, FTL, ZNF644, ROCK2, ZNF507, RXRA, ZHX1, F8, UBR1, CYP1A2, SPIRE2, NAPEPLD, MTF1, ZNF784, F5, MTF2, PRDM6, ZZZ3, ZNHIT1, ADAMTS1, TGFB1I1, CHORDC1, ADAMTS2, ADAMTS4, ZNF614, AHCY, CYP51A1, SFXN3, DIDO1, ADA, PLAGL1, ARIH1, ZNF70, NR1H3, MOCS1, PLAGL2, GIT1, IKZF5, ZC3H…	1384	1698	9249	1.21613	0.0382003	0.00647049	0.0582771
GOTERM_MF_FAT	GO:0008270~zinc ion binding	248	9.29884	0.000345208	ALAD, DZIP3, PDLIM7, ZNF389, PDLIM4, PDLIM2, PDLIM1, RNF215, G2E3, ERAP2, DDAH1, ZNF644, ROCK2, RXRA, ZNF507, ZHX1, SPIRE2, UBR1, NAPEPLD, MTF1, ZNF784, MTF2, PRDM6, ZNHIT1, ZZZ3, ADAMTS1, TGFB1I1, CHORDC1, ADAMTS2, ADAMTS4, ZNF614, DIDO1, ADA, PLAGL1, ARIH1, ZNF70, NR1H3, PLAGL2, GIT1, IKZF5, ZC3H13, IKZF3, PTGR1, CRIP1, MLL, KLF12, CRIP2, RYBP, ZBTB40, ZNF521, CSRP1, KLF15, SMYD2, CSRP2, ZNF627…	1384	1367	9249	1.21239	0.307443	0.0301498	0.548316
SP_PIR_KEYWORDS	metal-binding	204	7.64904	0.000697254	CYP3A4, EIF2C2, ALAD, PDLIM7, DZIP3, CYP2D14, RUSC1, PTGS1, PDLIM4, PDLIM2, PDLIM1, AURKB, EPT1, FAH, G2E3, PLOD1, NT5C2, ERAP2, SCD5, DDAH1, FTL, ROCK2, RXRA, F8, COLEC12, CYP1A2, PGM3, PGM5, NAPEPLD, F5, MTF2, PRDM6, ZNHIT1, ADAMTS1, TGFB1I1, CHORDC1, ADAMTS2, ADAMTS4, CYP51A1, DIDO1, ARIH1, NR1H3, MOCS1, IKZF5, MGAT4A, ZC3H13, IKZF3, CRIP1, CRIP2, TGFBR1, TKT, SMYD2, CSRP1, CSRP2, S100A13, ZBT…	1215	1010	7349	1.22169	0.297866	0.0218595	1.00134
SP_PIR_KEYWORDS	zinc	130	4.87439	0.0271915	ALAD, DZIP3, PDLIM7, MMP9, IDE, PDLIM4, MMP7, PDLIM2, PDLIM1, MMP3, MMP2, CNOT4, G2E3, ASPA, GATA4, RNF38, ERAP2, DDAH1, KCND1, ROCK2, RXRA, MTA3, RNF130, NAPEPLD, CPE, MTF2, PRDM6, ZNHIT1, SLU7, PGCP, TGFB1I1, CHORDC1, MYNN, ADAMTS2, ADAMTS4, FGD2, PAM, TIMP2, TIMP3, DIDO1, TIMP1, ARIH1, ALB, TRAF5, NR1H3, IKZF5, CPA5, ZC3H13, CRIP1, IKZF3, CRIP2, LMCD1, NR4A1, SMYD2, CSRP1, CSRP2, BRCA1, ZBTB43…	1215	670	7349	1.1736	0.999999	0.321757	32.8182
Annotation Cluster 7	Enrichment Score: 5.723298251714583
Category	Term	Count	%	PValue	Genes	List Total	Pop Hits	Pop Total	Fold Enrichment	Bonferroni	Benjamini	FDR
GOTERM_BP_FAT	GO:0007155~cell adhesion	77	2.88714	5.21038e-07	AEBP1, NRP1, COL21A1, CLDN3, CLSTN3, VTN, BCAM, POSTN, PCDH1, CTGF, VNN1, COL11A2, SPON1, F11R, PIK3CB, F8, FBLIM1, CTNNA1, CERCAM, THY1, JUP, F5, CD34, CPXM1, VCAN, MFAP4, EPDR1, COL3A1, ITGB4, PTK7, ITGA11, NINJ2, ITGB5, CLDN11, CDH2, ITGB3, PCDHGC3, ITGAM, CDH5, ALCAM, CD9, LGALS3BP, SORBS3, ITGAV, BCL2, PVRL2, TEK, PCDHA13, GPNMB, SELPLG, DPT, FN1, SPP1, COL18A1, B4GALT1, TNXB, OLR1, COL15A1,…	1260	306	8785	1.75445	0.00177932	0.000136984	0.000951843
GOTERM_BP_FAT	GO:0022610~biological adhesion	77	2.88714	5.21038e-07	AEBP1, NRP1, COL21A1, CLDN3, CLSTN3, VTN, BCAM, POSTN, PCDH1, CTGF, VNN1, COL11A2, SPON1, F11R, PIK3CB, F8, FBLIM1, CTNNA1, CERCAM, THY1, JUP, F5, CD34, CPXM1, VCAN, MFAP4, EPDR1, COL3A1, ITGB4, PTK7, ITGA11, NINJ2, ITGB5, CLDN11, CDH2, ITGB3, PCDHGC3, ITGAM, CDH5, ALCAM, CD9, LGALS3BP, SORBS3, ITGAV, BCL2, PVRL2, TEK, PCDHA13, GPNMB, SELPLG, DPT, FN1, SPP1, COL18A1, B4GALT1, TNXB, OLR1, COL15A1,…	1260	306	8785	1.75445	0.00177932	0.000136984	0.000951843
SP_PIR_KEYWORDS	cell adhesion	37	1.38733	2.49096e-05	CLSTN3, ITGB5, BCAM, CDH2, PCDHGC3, ADA, CDH5, ITGAM, ALCAM, CD9, LGALS3BP, PCDH1, CTGF, ITGAV, PCDHA13, SPP1, DPT, FN1, SPON1, OLR1, FBLIM1, PCDH12, ITGA3, ITGA4, CERCAM, CTNNA1, JUP, VWF, CDH13, TMEM8B, ITGA5, FBLN5, PECAM1, ITGAD, TRIP6, MFAP4, SELE	1215	111	7349	2.01619	0.0125499	0.00126213	0.0359349
Annotation Cluster 8	Enrichment Score: 5.6348736613207
Category	Term	Count	%	PValue	Genes	List Total	Pop Hits	Pop Total	Fold Enrichment	Bonferroni	Benjamini	FDR
GOTERM_BP_FAT	GO:0042060~wound healing	33	1.23735	5.92954e-10	PLDN, F13A1, NINJ2, GJA1, ELK3, DTNBP1, GPX1, FGG, PROCR, FGB, HMOX1, NOS3, ENTPD1, PAPSS2, TFPI2, RAB27A, FN1, B4GALT1, PIK3CB, EFEMP2, IGF1, SERPING1, ANXA5, VWF, THBD, F5, ITGA5, F2, PECAM1, TFPI, PROS1, F2R, MYH10	1260	72	8785	3.1956	2.02672e-06	4.05343e-07	1.08323e-06
GOTERM_BP_FAT	GO:0007596~blood coagulation	22	0.824897	2.50418e-06	PLDN, PIK3CB, EFEMP2, F13A1, SERPING1, ANXA5, DTNBP1, VWF, FGG, THBD, PROCR, F5, FGB, F2, TFPI, NOS3, ENTPD1, PAPSS2, TFPI2, PROS1, F2R, RAB27A	1260	51	8785	3.00763	0.00852276	0.000570457	0.0045746
GOTERM_BP_FAT	GO:0050817~coagulation	22	0.824897	2.50418e-06	PLDN, PIK3CB, EFEMP2, F13A1, SERPING1, ANXA5, DTNBP1, VWF, FGG, THBD, PROCR, F5, FGB, F2, TFPI, NOS3, ENTPD1, PAPSS2, TFPI2, PROS1, F2R, RAB27A	1260	51	8785	3.00763	0.00852276	0.000570457	0.0045746
GOTERM_BP_FAT	GO:0007599~hemostasis	22	0.824897	5.2217e-06	PLDN, PIK3CB, EFEMP2, F13A1, SERPING1, ANXA5, DTNBP1, VWF, FGG, THBD, PROCR, F5, FGB, F2, TFPI, NOS3, ENTPD1, PAPSS2, TFPI2, PROS1, F2R, RAB27A	1260	53	8785	2.89413	0.0176895	0.000991053	0.00953871
GOTERM_BP_FAT	GO:0050878~regulation of body fluid levels	23	0.862392	2.50012e-05	PLDN, PIK3CB, EFEMP2, F13A1, EDN1, SERPING1, ANXA5, DTNBP1, VWF, FGG, THBD, PROCR, F5, FGB, F2, TFPI, NOS3, ENTPD1, PAPSS2, TFPI2, PROS1, F2R, RAB27A	1260	62	8785	2.58647	0.0819058	0.00341238	0.0456631
SP_PIR_KEYWORDS	blood coagulation	14	0.524934	0.00031962	F13A1, SERPING1, ANXA5, VWF, FGG, THBD, PROCR, F5, FGB, F2, NOS3, TFPI2, PROS1, F2R	1215	29	7349	2.91999	0.149621	0.0115099	0.460177
Annotation Cluster 9	Enrichment Score: 5.554817733093703
Category	Term	Count	%	PValue	Genes	List Total	Pop Hits	Pop Total	Fold Enrichment	Bonferroni	Benjamini	FDR
SP_PIR_KEYWORDS	egf-like domain	37	1.38733	9.16661e-09	C7, CRELD2, MASP1, TNC, BTC, PTGS1, C1R, C1S, TEK, ELTD1, OIT3, TIE1, MATN2, PLAT, VASN, HYAL2, TNXB, EGFL7, EFEMP2, EFEMP1, FBN1, ATRN, NID1, NID2, STAB2, FBLN1, THBD, TMEM8B, TMEM8A, FBLN5, DLL4, LRP8, VCAN, SELE, PROS1, PLAU, VLDLR	1215	84	7349	2.66425	4.64746e-06	6.63924e-07	1.32261e-05
INTERPRO	IPR013032:EGF-like region, conserved site	43	1.6123	1.10471e-07	C7, CRELD2, PEAR1, TNC, BTC, PTGS1, ITGB5, C1R, C1S, LAMB2, TEK, MRCL, ELTD1, OIT3, TIE1, FN1, MATN2, PLAT, VASN, HYAL2, TNXB, EGFL7, EFEMP2, EFEMP1, FBN1, ATRN, NID1, NID2, STAB2, FBLN1, THBD, TMEM8B, TMEM8A, FBLN5, DLL4, LRP8, VCAN, NGFR, PROS1, SELE, CLEC14A, PLAU, VLDLR	1514	114	9171	2.28483	0.00021672	0.000108366	0.000189509
INTERPRO	IPR000152:EGF-type aspartate/asparagine hydroxylation conserved site	22	0.824897	1.74465e-07	MATN2, CRELD2, MASP1, EGFL7, EFEMP2, FBN1, EFEMP1, C1R, NID1, NID2, C1S, FBLN1, THBD, DLL4, FBLN5, OIT3, VCAN, LRP8, ELTD1, PROS1, CLEC14A, VLDLR	1514	40	9171	3.33161	0.000342241	0.000114093	0.000299288
INTERPRO	IPR001881:EGF-like calcium-binding	20	0.749906	1.05851e-06	MATN2, CRELD2, MASP1, EGFL7, EFEMP2, FBN1, EFEMP1, C1R, NID1, NID2, C1S, FBLN1, THBD, DLL4, FBLN5, VCAN, LRP8, ELTD1, PROS1, VLDLR	1514	37	9171	3.2743	0.00207463	0.000519063	0.00181582
INTERPRO	IPR000742:EGF-like, type 3	32	1.19985	2.66907e-06	CRELD2, PEAR1, TNC, PTGS1, BTC, TEK, MRCL, ELTD1, TIE1, MATN2, VASN, PLAT, TNXB, EGFL7, EFEMP2, FBN1, ATRN, EFEMP1, NID1, NID2, STAB2, FBLN1, THBD, TMEM8A, FBLN5, DLL4, LRP8, VCAN, SELE, PROS1, PLAU, VLDLR	1514	82	9171	2.36389	0.00522304	0.0010468	0.00457861
INTERPRO	IPR018097:EGF-like calcium-binding, conserved site	19	0.712411	3.35738e-06	CRELD2, MASP1, EGFL7, EFEMP2, FBN1, EFEMP1, C1R, NID1, C1S, NID2, FBLN1, THBD, FBLN5, OIT3, VCAN, LRP8, ELTD1, PROS1, VLDLR	1514	36	9171	3.19699	0.00656554	0.00109726	0.00575933
INTERPRO	IPR006210:EGF-like	33	1.23735	3.68885e-06	CRELD2, PEAR1, TNC, BTC, ITGB5, TEK, MRCL, ELTD1, OIT3, TIE1, MATN2, VASN, PLAT, HYAL2, TNXB, EGFL7, EFEMP2, FBN1, ATRN, NID1, NID2, STAB2, FBLN1, THBD, TMEM8B, DLL4, VCAN, LRP8, SELE, PROS1, CLEC14A, VLDLR, LRP5	1514	87	9171	2.29766	0.00721141	0.0010334	0.00632792
SMART	SM00179:EGF_CA	20	0.749906	9.25867e-06	MATN2, CRELD2, MASP1, EGFL7, EFEMP2, FBN1, EFEMP1, C1R, NID1, NID2, C1S, FBLN1, THBD, DLL4, FBLN5, VCAN, LRP8, ELTD1, PROS1, VLDLR	832	37	4364	2.83524	0.00314301	0.00314301	0.0126076
INTERPRO	IPR013091:EGF calcium-binding	15	0.56243	1.40198e-05	CRELD2, EGFL7, EFEMP2, FBN1, EFEMP1, C1R, NID1, NID2, FBLN1, THBD, FBLN5, LRP8, ELTD1, PROS1, VLDLR	1514	26	9171	3.49469	0.0271322	0.00343248	0.0240479
SMART	SM00181:EGF	33	1.23735	6.85862e-05	CRELD2, PEAR1, TNC, BTC, ITGB5, TEK, MRCL, ELTD1, OIT3, TIE1, MATN2, VASN, PLAT, HYAL2, TNXB, EGFL7, EFEMP2, FBN1, ATRN, NID1, NID2, STAB2, FBLN1, THBD, TMEM8B, DLL4, VCAN, LRP8, SELE, PROS1, CLEC14A, VLDLR, LRP5	832	87	4364	1.98956	0.0230503	0.0115923	0.0933592
INTERPRO	IPR006209:EGF	19	0.712411	0.00143341	VASN, PLAT, MATN2, PTGS1, ATRN, FBN1, BTC, NID1, STAB2, C1S, THBD, DLL4, OIT3, LRP8, VCAN, PROS1, SELE, VLDLR, LRP5	1514	53	9171	2.17154	0.940057	0.161296	2.4307
Annotation Cluster 10	Enrichment Score: 5.109838312407731
Category	Term	Count	%	PValue	Genes	List Total	Pop Hits	Pop Total	Fold Enrichment	Bonferroni	Benjamini	FDR
GOTERM_MF_FAT	GO:0030246~carbohydrate binding	48	1.79978	1.62076e-07	MASP1, ALDOB, PGLYRP1, VTN, POSTN, FSTL1, DCN, ASGR1, SLC2A8, LPHN2, GALK1, CRISPLD2, CTGF, APOE, GALNTL4, FCN2, PTN, PLA2R1, MAN2B1, GPNMB, SELPLG, LPHN1, FN1, APCS, TNXB, OLR1, LGALS1, MRC2, CHI3L1, CCDC80, LGALS8, COLEC12, STAB2, GALNTL1, VEGFB, CLEC1A, MAN2A1, LYVE1, BGN, CLEC3B, CD34, STAB1, CD209, GFPT2, ADAMTS1, VCAN, SELE, CLEC14A	1384	148	9249	2.1674	0.000172434	4.31113e-05	0.000258099
GOTERM_MF_FAT	GO:0005529~sugar binding	26	0.974878	3.98587e-05	MASP1, ALDOB, SLC2A8, LPHN2, ASGR1, GALK1, GALNTL4, FCN2, PLA2R1, SELPLG, LPHN1, APCS, OLR1, LGALS1, MRC2, CHI3L1, LGALS8, COLEC12, GALNTL1, CLEC1A, CLEC3B, CD209, GFPT2, VCAN, SELE, CLEC14A	1384	74	9249	2.34801	0.0415238	0.00528729	0.0634546
SP_PIR_KEYWORDS	Lectin	24	0.899888	7.24841e-05	LY75, APCS, OLR1, MASP1, LGALS1, CHI3L1, LGALS8, COLEC12, GALNTL1, CLEC11A, OS9, ASGR1, LPHN2, CLEC1A, CLEC3B, GALNTL4, FCN2, CD209, VCAN, PLA2R1, SELE, SELPLG, CLEC14A, LPHN1	1215	62	7349	2.34138	0.0360837	0.00305788	0.104533
Annotation Cluster 11	Enrichment Score: 4.632084152874666
Category	Term	Count	%	PValue	Genes	List Total	Pop Hits	Pop Total	Fold Enrichment	Bonferroni	Benjamini	FDR
GOTERM_BP_FAT	GO:0016477~cell migration	36	1.34983	5.31996e-06	CCL2, NDN, PDGFB, PAX6, GJA1, CDH2, CXCL12, GPX1, APOA1, CXCR4, CTGF, PEX13, NOS3, NR2F2, SELPLG, SCG2, APC, NR2F1, B4GALT1, PLAT, TGFBR1, ITGA3, ITGA4, MMP14, KDR, CDH13, CD34, CCR4, ITGA5, LRP8, APBB1, SELE, PLAU, ACVR1, MYH10, LRP5	1260	114	8785	2.20175	0.0180193	0.000956577	0.0097182
GOTERM_BP_FAT	GO:0006928~cell motion	41	1.53731	3.48804e-05	CCL2, NDN, PDGFB, PAX6, GJA1, CDH2, CXCL12, DSTN, CD9, GPX1, APOA1, CTGF, CXCR4, PEX13, NOS3, STRBP, NR2F2, SELPLG, SCG2, APC, NR2F1, B4GALT1, PLAT, TGFBR1, ITGA3, ITGA4, MMP14, KDR, CDH13, CD34, CCR4, ITGA5, EFNA5, LRP8, NGFR, APBB1, SELE, PLAU, MYH10, ACVR1, LRP5	1260	148	8785	1.93149	0.112391	0.00424893	0.0637014
GOTERM_BP_FAT	GO:0048870~cell motility	36	1.34983	3.99564e-05	CCL2, NDN, PDGFB, PAX6, GJA1, CDH2, CXCL12, GPX1, APOA1, CXCR4, CTGF, PEX13, NOS3, NR2F2, SELPLG, SCG2, APC, NR2F1, B4GALT1, PLAT, TGFBR1, ITGA3, ITGA4, MMP14, KDR, CDH13, CD34, CCR4, ITGA5, LRP8, APBB1, SELE, PLAU, ACVR1, MYH10, LRP5	1260	124	8785	2.02419	0.127658	0.00454211	0.0729683
GOTERM_BP_FAT	GO:0051674~localization of cell	36	1.34983	3.99564e-05	CCL2, NDN, PDGFB, PAX6, GJA1, CDH2, CXCL12, GPX1, APOA1, CXCR4, CTGF, PEX13, NOS3, NR2F2, SELPLG, SCG2, APC, NR2F1, B4GALT1, PLAT, TGFBR1, ITGA3, ITGA4, MMP14, KDR, CDH13, CD34, CCR4, ITGA5, LRP8, APBB1, SELE, PLAU, ACVR1, MYH10, LRP5	1260	124	8785	2.02419	0.127658	0.00454211	0.0729683
Annotation Cluster 12	Enrichment Score: 3.834971481593219
Category	Term	Count	%	PValue	Genes	List Total	Pop Hits	Pop Total	Fold Enrichment	Bonferroni	Benjamini	FDR
GOTERM_BP_FAT	GO:0043009~chordate embryonic development	44	1.64979	2.8973e-05	RBP4, FKBP8, ACVRL1, EDN1, PAX6, GJA1, ABI1, ADA, DAB2, G2E3, HOXA5, NCAPG2, COL4A3BP, GATA4, MYB, IPMK, ADAM10, EPAS1, TGFBR1, PTPRR, HSPG2, CAPN2, TAB1, BRCA1, FZD6, HOXB3, PLK4, TJP1, MEOX2, SFRP1, SP1, TSC1, PLCG1, SFRP2, MEOX1, GRN, HOPX, PHGDH, PDGFRA, PDGFRB, COL1A1, POFUT1, ACVR1, MYH10	1260	162	8785	1.89369	0.0942855	0.00380165	0.0529154
GOTERM_BP_FAT	GO:0009792~embryonic development ending in birth or egg hatching	44	1.64979	3.4021e-05	RBP4, FKBP8, ACVRL1, EDN1, PAX6, GJA1, ABI1, ADA, DAB2, G2E3, HOXA5, NCAPG2, COL4A3BP, GATA4, MYB, IPMK, ADAM10, EPAS1, TGFBR1, PTPRR, HSPG2, CAPN2, TAB1, BRCA1, FZD6, HOXB3, PLK4, TJP1, MEOX2, SFRP1, SP1, TSC1, PLCG1, SFRP2, MEOX1, GRN, HOPX, PHGDH, PDGFRA, PDGFRB, COL1A1, POFUT1, ACVR1, MYH10	1260	163	8785	1.88207	0.109779	0.00429762	0.0621322
GOTERM_BP_FAT	GO:0001701~in utero embryonic development	26	0.974878	0.00317209	ACVRL1, EDN1, GJA1, ADA, G2E3, DAB2, NCAPG2, COL4A3BP, GATA4, MYB, ADAM10, EPAS1, TGFBR1, PTPRR, CAPN2, TAB1, TJP1, PLK4, PLCG1, SP1, GRN, PDGFRA, HOPX, PDGFRB, ACVR1, MYH10	1260	100	8785	1.81278	0.999981	0.124038	5.63884
Annotation Cluster 13	Enrichment Score: 3.5410011109493014
Category	Term	Count	%	PValue	Genes	List Total	Pop Hits	Pop Total	Fold Enrichment	Bonferroni	Benjamini	FDR
INTERPRO	IPR008160:Collagen triple helix repeat	26	0.974878	4.53468e-09	CTHRC1, MSR1, COL21A1, COL3A1, C1QC, C1QTNF9, C1QTNF7, C1QTNF5, C1QTNF3, COL27A1, FCN2, C1QTNF1, EMID1, COL6A2, COL8A1, COL11A2, COL18A1, COL4A1, COLEC12, ADIPOQ, C1QA, C1QB, COL1A2, MGC137014, COL1A1, SCARA5	1514	46	9171	3.42378	8.89701e-06	8.89701e-06	7.77911e-06
SP_PIR_KEYWORDS	collagen	25	0.937383	1.52189e-08	CTHRC1, MSR1, COL3A1, C1QC, PCOLCE, C1QTNF9, C1QTNF7, C1QTNF5, C1QTNF3, FCN2, C1QTNF1, COL6A2, COL8A1, COL11A2, COL18A1, COL4A2, COL4A1, COLEC12, ADIPOQ, PCOLCE2, C1QA, C1QB, COL1A2, MGC137014, COL1A1	1215	45	7349	3.36031	7.71594e-06	9.64496e-07	2.19586e-05
INTERPRO	IPR001073:Complement C1q protein	11	0.412448	0.00017634	C1QA, C1QTNF7, C1QB, C1QTNF5, C1QTNF3, C1QTNF1, MGC137014, COL8A1, C1QC, ADIPOQ, C1QTNF9	1514	18	9171	3.70178	0.292494	0.0340092	0.302075
SMART	SM00110:C1Q	11	0.412448	0.000588637	C1QA, C1QTNF7, C1QB, C1QTNF5, C1QTNF3, C1QTNF1, MGC137014, COL8A1, C1QC, ADIPOQ, C1QTNF9	832	18	4364	3.2054	0.181429	0.064554	0.798626
INTERPRO	IPR008983:Tumour necrosis factor-like	11	0.412448	0.00603092	C1QA, C1QTNF7, C1QB, C1QTNF5, C1QTNF3, C1QTNF1, MGC137014, COL8A1, C1QC, ADIPOQ, C1QTNF9	1514	26	9171	2.56277	0.999993	0.390136	9.8569
UP_SEQ_FEATURE	glycosylation site:O-linked (Gal...)	5	0.187477	0.00657788	C1QA, C1QB, COL3A1, COL1A1, ADIPOQ	873	6	5635	5.37896	1	0.696846	10.9178
PIR_SUPERFAMILY	PIRSF002477:complement subcomponent C1q chain A	4	0.149981	0.0177416	C1QA, C1QB, C1QTNF5, ADIPOQ	671	4	3890	5.79732	0.999994	0.981971	23.5501
UP_SEQ_FEATURE	domain:C1q	4	0.149981	0.0512714	C1QA, C1QB, ADIPOQ, C1QTNF9	873	6	5635	4.30317	1	0.976474	60.2279
UP_SEQ_FEATURE	domain:Collagen-like	6	0.224972	0.0523029	C1QA, C1QB, MSR1, FCN2, SCARA5, ADIPOQ	873	14	5635	2.76632	1	0.975635	60.9786
Annotation Cluster 14	Enrichment Score: 3.276644320124641
Category	Term	Count	%	PValue	Genes	List Total	Pop Hits	Pop Total	Fold Enrichment	Bonferroni	Benjamini	FDR
GOTERM_MF_FAT	GO:0030246~carbohydrate binding	48	1.79978	1.62076e-07	MASP1, ALDOB, PGLYRP1, VTN, POSTN, FSTL1, DCN, ASGR1, SLC2A8, LPHN2, GALK1, CRISPLD2, CTGF, APOE, GALNTL4, FCN2, PTN, PLA2R1, MAN2B1, GPNMB, SELPLG, LPHN1, FN1, APCS, TNXB, OLR1, LGALS1, MRC2, CHI3L1, CCDC80, LGALS8, COLEC12, STAB2, GALNTL1, VEGFB, CLEC1A, MAN2A1, LYVE1, BGN, CLEC3B, CD34, STAB1, CD209, GFPT2, ADAMTS1, VCAN, SELE, CLEC14A	1384	148	9249	2.1674	0.000172434	4.31113e-05	0.000258099
GOTERM_MF_FAT	GO:0005539~glycosaminoglycan binding	19	0.712411	0.000917473	TNXB, CCDC80, PGLYRP1, FSTL1, POSTN, STAB2, DCN, VEGFB, LYVE1, BGN, APOE, CTGF, CRISPLD2, STAB1, PTN, ADAMTS1, VCAN, GPNMB, FN1	1384	56	9249	2.26738	0.623426	0.0528121	1.45108
GOTERM_MF_FAT	GO:0030247~polysaccharide binding	20	0.749906	0.00412451	TNXB, CCDC80, PGLYRP1, FSTL1, VTN, POSTN, STAB2, DCN, VEGFB, LYVE1, BGN, APOE, CTGF, CRISPLD2, STAB1, PTN, ADAMTS1, VCAN, GPNMB, FN1	1384	68	9249	1.96553	0.987693	0.1503	6.36978
GOTERM_MF_FAT	GO:0001871~pattern binding	20	0.749906	0.00412451	TNXB, CCDC80, PGLYRP1, FSTL1, VTN, POSTN, STAB2, DCN, VEGFB, LYVE1, BGN, APOE, CTGF, CRISPLD2, STAB1, PTN, ADAMTS1, VCAN, GPNMB, FN1	1384	68	9249	1.96553	0.987693	0.1503	6.36978
GOTERM_MF_FAT	GO:0008201~heparin binding	12	0.449944	0.0163577	VEGFB, TNXB, APOE, CTGF, CRISPLD2, CCDC80, PTN, ADAMTS1, FSTL1, POSTN, GPNMB, FN1	1384	37	9249	2.1674	1	0.369853	23.0984
Annotation Cluster 15	Enrichment Score: 3.1679899374253075
Category	Term	Count	%	PValue	Genes	List Total	Pop Hits	Pop Total	Fold Enrichment	Bonferroni	Benjamini	FDR
GOTERM_BP_FAT	GO:0032101~regulation of response to external stimulus	24	0.899888	3.97786e-05	FCER1A, CAV1, A2M, ADAM10, ADORA3, C3, CD276, TLR4, CXCL12, ADA, ANXA2, KDR, GPX1, CDH13, TNFRSF1A, S100B, APOE, FCGR1A, AOAH, F2, HOPX, LBP, F2R, SCG2	1260	68	8785	2.46078	0.127128	0.0046775	0.0726436
GOTERM_BP_FAT	GO:0050727~regulation of inflammatory response	12	0.449944	0.00199244	FCER1A, TNFRSF1A, GPX1, A2M, ADORA3, S100B, C3, AOAH, FCGR1A, CD276, LBP, ADA	1260	30	8785	2.78889	0.998905	0.0915482	3.5779
GOTERM_BP_FAT	GO:0032103~positive regulation of response to external stimulus	11	0.412448	0.00395363	FCER1A, TNFRSF1A, CDH13, ADAM10, ADORA3, C3, FCGR1A, LBP, CXCL12, KDR, SCG2	1260	28	8785	2.73909	0.999999	0.144129	6.98125
Annotation Cluster 16	Enrichment Score: 3.1660803435823914
Category	Term	Count	%	PValue	Genes	List Total	Pop Hits	Pop Total	Fold Enrichment	Bonferroni	Benjamini	FDR
GOTERM_BP_FAT	GO:0001501~skeletal system development	34	1.27484	0.000114692	TWSG1, RBP4, PDLIM7, MMP9, HEXA, PTH1R, EDN1, MMP2, HOXA5, CTGF, BCL2, PRKRA, PTN, COL11A2, SPP1, TGFBR1, HSPG2, IGF1, MGP, IGF2, SMAD2, SMAD1, HOXB3, P2RX7, SP1, CLEC3B, PDGFRA, COL1A2, PDGFRB, COL1A1, EXT1, IGFBP3, IGFBP5, PLEKHA1	1260	120	8785	1.97546	0.324322	0.0100019	0.209315
GOTERM_BP_FAT	GO:0001503~ossification	19	0.712411	0.000331168	TWSG1, PDLIM7, PTH1R, HSPG2, IGF1, MGP, IGF2, SMAD2, SMAD1, MMP2, SP1, CTGF, BCL2, PTN, COL1A1, EXT1, IGFBP3, IGFBP5, SPP1	1260	54	8785	2.45319	0.677651	0.0228396	0.60326
GOTERM_BP_FAT	GO:0060348~bone development	19	0.712411	0.000331168	TWSG1, PDLIM7, PTH1R, HSPG2, IGF1, MGP, IGF2, SMAD2, SMAD1, MMP2, SP1, CTGF, BCL2, PTN, COL1A1, EXT1, IGFBP3, IGFBP5, SPP1	1260	54	8785	2.45319	0.677651	0.0228396	0.60326
GOTERM_BP_FAT	GO:0001649~osteoblast differentiation	8	0.299963	0.0172206	PTH1R, IGF1, SMAD2, IGF2, COL1A1, SMAD1, IGFBP3, IGFBP5	1260	20	8785	2.78889	1	0.371142	27.1911
Annotation Cluster 17	Enrichment Score: 3.117842151107145
Category	Term	Count	%	PValue	Genes	List Total	Pop Hits	Pop Total	Fold Enrichment	Bonferroni	Benjamini	FDR
GOTERM_BP_FAT	GO:0009611~response to wounding	68	2.54968	2.24918e-15	ADORA3, F13A1, GJA1, TLR3, TLR4, GPX1, HMOX1, CFH, ITIH4, VNN1, NOS3, LBP, CFD, TFPI2, RAB27A, C4A, PIK3CB, SAA3, SERPING1, CD163, C1QA, C1QB, THBD, F5, SERPINF2, DARC, CCR4, F2, TFPI, PROS1, ACVR1, C7, PLDN, C3, CXCL9, NINJ2, C1S, ELK3, DTNBP1, TNFRSF4, TNFRSF1A, FGG, PROCR, FGB, BCL2, FCN2, FCGR1A, C2, ENTPD1, PAPSS2, FN1, B4GALT1, OLR1, CFB, EFEMP2, IGF1, SMAD1, ANXA5, CYBA, VWF, P2RX7, NUPR1,…	1260	175	8785	2.70921	7.58948e-12	7.58948e-12	4.05231e-12
GOTERM_BP_FAT	GO:0002526~acute inflammatory response	25	0.937383	2.3662e-10	C7, ADORA3, C3, TLR4, C1S, FCGR1A, FCN2, CFH, ITIH4, VNN1, C2, LBP, CFD, FN1, B4GALT1, C4A, CFB, SAA3, CD163, C1QA, C1QB, NUPR1, SERPINF2, F2, ACVR1	1260	43	8785	4.05362	8.08767e-07	4.04384e-07	4.32264e-07
GOTERM_BP_FAT	GO:0006954~inflammatory response	39	1.46232	1.25488e-08	C7, ADORA3, C3, CXCL9, TLR3, TLR4, C1S, TNFRSF4, TNFRSF1A, HMOX1, FCGR1A, FCN2, ITIH4, CFH, VNN1, LBP, C2, CFD, FN1, B4GALT1, C4A, OLR1, CFB, SAA3, SMAD1, CD163, C1QA, C1QB, CYBA, P2RX7, NUPR1, SERPINF2, CCR4, DARC, F2, ALOX5, CD14, F2R, ACVR1	1260	104	8785	2.61458	4.28907e-05	5.36144e-06	2.29244e-05
GOTERM_BP_FAT	GO:0006952~defense response	62	2.32471	2.10304e-07	ADORA3, SNCA, PGLYRP1, TLR3, TLR4, HMOX1, CFH, ITIH4, VNN1, DEFB10, NOS2, LBP, CFD, RAB27A, C4A, SAA3, CNPY3, CST3, IFI47, CD163, C1QA, C1QB, CHGA, SERPINF2, CCR4, DARC, LYST, F2, ACVR1, C7, FGR, C3, CXCL9, RSAD2, C1S, TNFRSF4, TNFRSF1A, DEFB7, BCL2, FCN2, FCGR1A, C2, FN1, B4GALT1, CARD9, OLR1, CFB, POLR3A, STAB2, SMAD1, BNBD-9-LIKE, S100A12, LSP1, CYBA, P2RX7, CATHL2, NUPR1, KCNJ8, CXCL16, ALOX5…	1260	223	8785	1.93847	0.00071856	5.98997e-05	0.000384188
GOTERM_BP_FAT	GO:0045087~innate immune response	24	0.899888	5.09042e-06	C7, C4A, C3, CFB, SNCA, CNPY3, TLR3, POLR3A, TLR4, C1S, C1QA, CYBA, C1QB, TNFRSF1A, CHGA, LYST, CXCL16, FCN2, CFH, VNN1, LBP, C2, CFD, RAB27A	1260	61	8785	2.74317	0.0172486	0.00102295	0.00929891
GOTERM_BP_FAT	GO:0048584~positive regulation of response to stimulus	35	1.31234	1.44725e-05	C7, ADORA3, C3, TLR3, TLR4, C1S, CXCL12, ADA, TNFRSF1A, FCGR1A, FCN2, PVRL2, CFH, LBP, C2, CFD, SCG2, FCER1A, CRTAM, CARD9, ADAM10, C4A, THEMIS, CFB, IGF2, KDR, THY1, RNF8, C1QA, CDH13, C1QB, P2RX7, S100B, PLCG1, APBB1	1260	114	8785	2.14059	0.0482639	0.00205902	0.0264355
GOTERM_BP_FAT	GO:0002541~activation of plasma proteins involved in acute inflammatory response	11	0.412448	9.46755e-05	C1QA, C1QB, C7, C4A, C3, CFB, FCN2, CFH, C1S, C2, CFD	1260	19	8785	4.03655	0.276472	0.00870825	0.172815
GOTERM_BP_FAT	GO:0006956~complement activation	11	0.412448	9.46755e-05	C1QA, C1QB, C7, C4A, C3, CFB, FCN2, CFH, C1S, C2, CFD	1260	19	8785	4.03655	0.276472	0.00870825	0.172815
GOTERM_BP_FAT	GO:0051605~protein maturation by peptide bond cleavage	16	0.599925	0.000122152	C7, SEC11C, C4A, C3, CFB, C1S, MMP14, C1QA, C1QB, CPE, FCN2, CFH, C2, CFD, ADAMTS2, DHCR24	1260	38	8785	2.93567	0.341335	0.0103842	0.222915
GOTERM_BP_FAT	GO:0002684~positive regulation of immune system process	35	1.31234	0.00035602	C7, PLDN, ADORA3, C3, IL18, TLR4, C1S, ADA, AQP3, HLX, FCGR1A, FCN2, PVRL2, CFH, VNN1, LBP, C2, CFD, FCER1A, CRTAM, CARD9, ADAM10, C4A, THEMIS, CFB, CD276, SOCS5, BAD, THY1, C1QA, C1QB, CD83, P2RX7, S100B, PLCG1	1260	132	8785	1.8487	0.70391	0.024048	0.648391
SP_PIR_KEYWORDS	innate immunity	16	0.599925	0.000429225	C7, C4A, C3, CFB, CNPY3, CRCP, TLR3, POLR3A, TLR4, C1S, C1QA, C1QB, FCN2, CFH, C2, CFD	1215	37	7349	2.61559	0.195604	0.0144062	0.617529
GOTERM_BP_FAT	GO:0016485~protein processing	18	0.674916	0.000621213	C7, METAP2, SEC11C, C4A, C3, CFB, C1S, MMP14, C1QA, C1QB, P2RX7, CPE, FCN2, CFH, C2, CFD, ADAMTS2, DHCR24	1260	52	8785	2.41346	0.880443	0.0372177	1.12878
GOTERM_BP_FAT	GO:0050778~positive regulation of immune response	23	0.862392	0.000869581	FCER1A, C7, CRTAM, CARD9, C4A, C3, CFB, THEMIS, C1S, ADA, THY1, C1QA, C1QB, P2RX7, S100B, PLCG1, FCN2, FCGR1A, PVRL2, CFH, LBP, C2, CFD	1260	77	8785	2.08261	0.948877	0.0483507	1.5767
GOTERM_BP_FAT	GO:0051604~protein maturation	18	0.674916	0.00126678	C7, METAP2, SEC11C, C4A, C3, CFB, C1S, MMP14, C1QA, C1QB, P2RX7, CPE, FCN2, CFH, C2, CFD, ADAMTS2, DHCR24	1260	55	8785	2.28182	0.986866	0.0644823	2.28905
GOTERM_BP_FAT	GO:0006955~immune response	62	2.32471	0.00134837	ADORA3, IL18, SNCA, DSB, PGLYRP1, TLR3, VTN, TLR4, CXCL12, ULBP11, CFH, VNN1, ERAP2, FAS, LBP, CFD, RAB27A, GBP5, C4A, CNPY3, STXBP2, COLEC12, C1QA, BOLA-DQA1, C1QB, CCR7, CHGA, ULBP3, LYST, AICDA, PTMS, GBP4, BOLA-DYB, C7, CCL2, C3, CXCL9, RSAD2, FCGRT, OAS2, C1S, ADA, TNFRSF1A, CCL22, PROCR, FCN2, FCGR1A, C2, CARD9, OLR1, THEMIS, CFB, IL1RN, POLR3A, TNFSF8, CCL17, CYBA, OASL, CCL14, KCNJ8, CXCL…	1260	293	8785	1.47535	0.990066	0.0674909	2.43477
GOTERM_BP_FAT	GO:0002252~immune effector process	21	0.787402	0.00146794	C7, CARD9, ADORA3, C4A, C3, CFB, RSAD2, STXBP2, C1S, C1QA, C1QB, KCNJ8, LYST, FCN2, FCGR1A, CFH, AICDA, C2, FAS, CFD, RAB27A	1260	70	8785	2.09167	0.993403	0.0711796	2.64796
GOTERM_BP_FAT	GO:0006959~humoral immune response	11	0.412448	0.0020973	C1QA, C1QB, C7, C4A, C3, CFB, FCN2, CFH, C1S, C2, CFD	1260	26	8785	2.94979	0.999235	0.0936257	3.76281
SP_PIR_KEYWORDS	immune response	23	0.862392	0.00217963	C7, OLR1, C4A, C3, CFB, THEMIS, TOLLIP, PGLYRP1, CNPY3, CRCP, TLR3, POLR3A, TLR4, C1S, C1QA, C1QB, FCN2, CFH, ERAP2, C2, CFD, PTMS, CD14	1215	72	7349	1.93218	0.669213	0.0596094	3.09929
INTERPRO	IPR016060:Complement control module	13	0.487439	0.00791927	PLAT, C7, MASP1, CFB, SUSD2, HP, C1S, SRPX, CFH, VCAN, C2, SELE, FN1	1514	35	9171	2.24992	1	0.451177	12.7501
GOTERM_BP_FAT	GO:0002443~leukocyte mediated immunity	14	0.524934	0.0085825	C7, ADORA3, C4A, C3, STXBP2, C1S, C1QA, C1QB, FCGR1A, LYST, AICDA, FAS, C2, RAB27A	1260	45	8785	2.16914	1	0.255182	14.5693
GOTERM_BP_FAT	GO:0002455~humoral immune response mediated by circulating immunoglobulin	7	0.262467	0.00917172	C1QA, C1QB, C7, C4A, C3, C1S, C2	1260	14	8785	3.48611	1	0.26127	15.492
GOTERM_BP_FAT	GO:0006958~complement activation, classical pathway	7	0.262467	0.00917172	C1QA, C1QB, C7, C4A, C3, C1S, C2	1260	14	8785	3.48611	1	0.26127	15.492
GOTERM_BP_FAT	GO:0006957~complement activation, alternative pathway	5	0.187477	0.010236	C7, C3, CFB, CFH, CFD	1260	7	8785	4.98016	1	0.280114	17.135
GOTERM_BP_FAT	GO:0002253~activation of immune response	14	0.524934	0.0125804	C7, C4A, THEMIS, CFB, C3, C1S, THY1, C1QA, C1QB, PLCG1, FCN2, CFH, C2, CFD	1260	47	8785	2.07683	1	0.309162	20.6483
SP_PIR_KEYWORDS	complement alternate pathway	5	0.187477	0.0170354	C7, C3, CFB, CFH, CFD	1215	7	7349	4.3204	0.999835	0.259471	21.9572
SP_PIR_KEYWORDS	complement pathway	7	0.262467	0.018194	C1QA, C1QB, C7, C4A, C3, C1S, C2	1215	14	7349	3.02428	0.999909	0.26678	23.274
GOTERM_BP_FAT	GO:0002250~adaptive immune response	12	0.449944	0.0217741	C1QA, C1QB, C7, C4A, C3, IL18, FCGR1A, AICDA, C1S, C2, FAS, RAB27A	1260	40	8785	2.09167	1	0.411337	33.1132
GOTERM_BP_FAT	GO:0002460~adaptive immune response based on somatic recombination of immune receptors built from immunoglobulin superfamily domains	12	0.449944	0.0217741	C1QA, C1QB, C7, C4A, C3, IL18, FCGR1A, AICDA, C1S, C2, FAS, RAB27A	1260	40	8785	2.09167	1	0.411337	33.1132
GOTERM_BP_FAT	GO:0002449~lymphocyte mediated immunity	12	0.449944	0.0217741	C1QA, C1QB, C7, C4A, C3, LYST, FCGR1A, AICDA, C1S, C2, FAS, RAB27A	1260	40	8785	2.09167	1	0.411337	33.1132
SP_PIR_KEYWORDS	sushi	9	0.337458	0.0260314	C7, MASP1, CFB, CFH, HP, VCAN, C1S, C2, SELE	1215	23	7349	2.36683	0.999998	0.325184	31.6528
INTERPRO	IPR000436:Sushi/SCR/CCP	11	0.412448	0.0353308	C7, SRPX, MASP1, CFB, SUSD2, CFH, HP, VCAN, C1S, C2, SELE	1514	33	9171	2.01915	1	0.777217	46.0469
GOTERM_BP_FAT	GO:0019724~B cell mediated immunity	10	0.374953	0.0381365	C1QA, C1QB, C7, C4A, C3, FCGR1A, AICDA, C1S, C2, FAS	1260	33	8785	2.11279	1	0.53616	50.8514
UP_SEQ_FEATURE	domain:Sushi 1	7	0.262467	0.0475943	C7, CFB, CFH, HP, C1S, C2, SELE	873	18	5635	2.51018	1	0.975232	57.4392
UP_SEQ_FEATURE	domain:Sushi 2	7	0.262467	0.0607777	C7, CFB, CFH, HP, C1S, C2, SELE	873	19	5635	2.37807	1	0.981393	66.6602
GOTERM_BP_FAT	GO:0016064~immunoglobulin mediated immune response	9	0.337458	0.077212	C1QA, C1QB, C7, C4A, C3, FCGR1A, AICDA, C1S, C2	1260	32	8785	1.96094	1	0.708187	76.9605
SMART	SM00032:CCP	11	0.412448	0.0812795	C7, SRPX, MASP1, CFB, SUSD2, CFH, HP, VCAN, C1S, C2, SELE	832	33	4364	1.7484	1	0.78063	68.4763
UP_SEQ_FEATURE	domain:Sushi 3	4	0.149981	0.2356	CFB, CFH, C2, SELE	873	11	5635	2.34718	1	0.999908	99.0963
KEGG_PATHWAY	bta05322:Systemic lupus erythematosus	15	0.56243	0.878162	C7, C4A, C3, ELANE, C1R, C1S, H2AFJ, C1QC, C1QA, BOLA-DQA1, C1QB, TROVE2, FCGR1A, C2, BOLA-DYB	765	116	4940	0.835024	1	0.958224	100
Annotation Cluster 18	Enrichment Score: 3.041539140682844
Category	Term	Count	%	PValue	Genes	List Total	Pop Hits	Pop Total	Fold Enrichment	Bonferroni	Benjamini	FDR
GOTERM_BP_FAT	GO:0030155~regulation of cell adhesion	22	0.824897	0.000108429	ADAM10, PIK3CB, IL18, CSF1, CCDC80, VTN, NID1, ADIPOQ, ADA, CDH13, CHGA, LAMA3, TSC1, LAMA5, BCL2, TGM2, COL1A1, COL8A1, PIK3R1, SPP1, CYR61, APC	1260	63	8785	2.43474	0.309702	0.00970606	0.197897
GOTERM_BP_FAT	GO:0010810~regulation of cell-substrate adhesion	13	0.487439	0.000233668	PIK3CB, CSF1, CCDC80, VTN, NID1, CDH13, TSC1, BCL2, COL1A1, COL8A1, PIK3R1, CYR61, SPP1	1260	28	8785	3.2371	0.550119	0.0168515	0.426011
GOTERM_BP_FAT	GO:0010811~positive regulation of cell-substrate adhesion	9	0.337458	0.00301725	CDH13, TSC1, CSF1, CCDC80, VTN, NID1, COL8A1, CYR61, SPP1	1260	19	8785	3.30263	0.999967	0.119718	5.37072
GOTERM_BP_FAT	GO:0045785~positive regulation of cell adhesion	11	0.412448	0.00892248	CDH13, TSC1, CSF1, TGM2, CCDC80, VTN, NID1, COL8A1, APC, CYR61, SPP1	1260	31	8785	2.47401	1	0.257266	15.1029
Annotation Cluster 19	Enrichment Score: 3.0164767154685324
Category	Term	Count	%	PValue	Genes	List Total	Pop Hits	Pop Total	Fold Enrichment	Bonferroni	Benjamini	FDR
GOTERM_BP_FAT	GO:0035295~tube development	30	1.12486	7.09219e-05	RBP4, DICER1, EDN1, GJA1, CXCL12, ADA, GPC3, HOXA5, CXCR4, CTGF, BCL2, GATA4, NOS3, IPMK, CYR61, B4GALT1, EPAS1, IGF1, CYP1A2, MMP14, TAB1, KDR, FZD6, TSC1, SP1, PDGFRA, HOPX, ADAMTS2, ACVR1, NFIB	1260	98	8785	2.13435	0.215273	0.00710463	0.129483
GOTERM_BP_FAT	GO:0030323~respiratory tube development	16	0.599925	0.00212985	RBP4, EPAS1, DICER1, CYP1A2, TAB1, MMP14, ADA, KDR, SP1, CTGF, HOXA5, PDGFRA, HOPX, NOS3, ADAMTS2, NFIB	1260	48	8785	2.32407	0.999316	0.0937871	3.82014
GOTERM_BP_FAT	GO:0030324~lung development	16	0.599925	0.00212985	RBP4, EPAS1, DICER1, CYP1A2, TAB1, MMP14, ADA, KDR, SP1, CTGF, HOXA5, PDGFRA, HOPX, NOS3, ADAMTS2, NFIB	1260	48	8785	2.32407	0.999316	0.0937871	3.82014
GOTERM_BP_FAT	GO:0060541~respiratory system development	16	0.599925	0.00267063	RBP4, EPAS1, DICER1, CYP1A2, TAB1, MMP14, ADA, KDR, SP1, CTGF, HOXA5, PDGFRA, HOPX, NOS3, ADAMTS2, NFIB	1260	49	8785	2.27664	0.999893	0.110579	4.7679
Annotation Cluster 20	Enrichment Score: 2.950846415813251
Category	Term	Count	%	PValue	Genes	List Total	Pop Hits	Pop Total	Fold Enrichment	Bonferroni	Benjamini	FDR
GOTERM_MF_FAT	GO:0046983~protein dimerization activity	54	2.02475	0.000182663	BACH2, IDE, ASGR1, FOS, AGTR1, APOE, NOS2, TERT, ADAM10, OLFML2B, FOSB, STK4, C1QB, SDS, JUN, PRDM6, SDCBP, EXT1, NFE2L3, ACVR1, GCLC, SNX6, CSF1, CEP57, BCL2, PRKRA, PVRL2, CSF1R, B4GALT1, CEBPA, IKZF3, NFE2, S100A16, ZMYM1, CARD9, EPAS1, TGFBR1, CREB1, PM20D1, S100A11, NR4A1, SMAD2, ADIPOQ, SMC3, CYBA, VWF, CDH13, S100B, DBP, SUMF1, PON1, QPRT, DPYD, SMC1A	1384	219	9249	1.64781	0.176648	0.0192494	0.290487
GOTERM_MF_FAT	GO:0042802~identical protein binding	56	2.09974	0.00149687	S100A4, ALAD, CLDN3, SNCA, IDE, AMOTL2, ASGR1, RABAC1, APOA1, APOE, NOS2, TERT, ALS2CL, ADAM10, OLFML2B, FADD, STK4, C1QB, DOK2, GLUL, SDS, PRDM6, COL1A2, COL1A1, EXT1, ACVR1, PLDN, SNX6, CSF1, ALDOB, ITGB3, APLP1, CEP57, PVRL2, PRKRA, CSF1R, B4GALT1, CARD9, S100A16, S100A11, NR4A1, SMAD2, SMAD1, ITGA4, OXSR1, ADIPOQ, VWF, CDH13, S100B, SUMF1, PON1, QPRT, TPRG1L, DPYD, TRIP6, PARP1	1384	249	9249	1.50296	0.79686	0.0669516	2.35726
GOTERM_MF_FAT	GO:0042803~protein homodimerization activity	33	1.23735	0.00513603	SNX6, CSF1, IDE, ASGR1, CEP57, APOE, PRKRA, PVRL2, NOS2, TERT, CSF1R, B4GALT1, CARD9, ADAM10, S100A16, OLFML2B, S100A11, NR4A1, SMAD2, STK4, ADIPOQ, VWF, C1QB, CDH13, S100B, SDS, PRDM6, PON1, SUMF1, QPRT, DPYD, EXT1, ACVR1	1384	136	9249	1.62156	0.995826	0.172151	7.87281
Annotation Cluster 21	Enrichment Score: 2.8288796919072587
Category	Term	Count	%	PValue	Genes	List Total	Pop Hits	Pop Total	Fold Enrichment	Bonferroni	Benjamini	FDR
GOTERM_BP_FAT	GO:0035295~tube development	30	1.12486	7.09219e-05	RBP4, DICER1, EDN1, GJA1, CXCL12, ADA, GPC3, HOXA5, CXCR4, CTGF, BCL2, GATA4, NOS3, IPMK, CYR61, B4GALT1, EPAS1, IGF1, CYP1A2, MMP14, TAB1, KDR, FZD6, TSC1, SP1, PDGFRA, HOPX, ADAMTS2, ACVR1, NFIB	1260	98	8785	2.13435	0.215273	0.00710463	0.129483
GOTERM_BP_FAT	GO:0048754~branching morphogenesis of a tube	13	0.487439	0.000503808	B4GALT1, DICER1, EDN1, IGF1, MMP14, CXCL12, KDR, GPC3, CXCR4, HOXA5, BCL2, CYR61, ACVR1	1260	30	8785	3.0213	0.821372	0.030832	0.916378
GOTERM_BP_FAT	GO:0001763~morphogenesis of a branching structure	13	0.487439	0.00244167	B4GALT1, DICER1, EDN1, IGF1, MMP14, CXCL12, KDR, GPC3, CXCR4, HOXA5, BCL2, CYR61, ACVR1	1260	35	8785	2.58968	0.999765	0.102837	4.36771
GOTERM_BP_FAT	GO:0035239~tube morphogenesis	17	0.63742	0.00282979	B4GALT1, DICER1, EDN1, GJA1, IGF1, MMP14, CXCL12, FZD6, KDR, GPC3, TSC1, CXCR4, HOXA5, BCL2, IPMK, CYR61, ACVR1	1260	54	8785	2.19496	0.999938	0.115389	5.04515
GOTERM_BP_FAT	GO:0001569~patterning of blood vessels	5	0.187477	0.0290479	CXCR4, EDN1, CXCL12, ACVR1, CYR61	1260	9	8785	3.87346	1	0.469368	41.6385
Annotation Cluster 22	Enrichment Score: 2.814064804739394
Category	Term	Count	%	PValue	Genes	List Total	Pop Hits	Pop Total	Fold Enrichment	Bonferroni	Benjamini	FDR
GOTERM_CC_FAT	GO:0005887~integral to plasma membrane	45	1.68729	0.00135756	C7, CAV1, ADORA3, ITGB4, ITGA11, ITGB5, TLR4, ITGB3, ITGAM, KCNMB1, EPHB1, SLC2A8, KCNS3, MUSK, SLC2A4, ITGAV, TEK, GPNMB, INSR, CSF1R, FCER1A, KCNMA1, KCND1, SLC6A12, AXL, SLC6A15, ITGA3, STAB2, ITGA4, ITPR3, ANKH, KDR, ITGA9, CYBA, P2RX7, SLC6A6, VAMP5, ROR2, PDGFRB, SDCBP, ITGAD, TRIP6, SCARA5, KCTD11, ACVR1	997	197	6966	1.59601	0.44166	0.0261426	1.89591
GOTERM_CC_FAT	GO:0043235~receptor complex	18	0.674916	0.00152554	CSF1, ITGB4, ITGA11, ITGB5, ITGA3, TLR4, SMAD2, ITGB3, ITGA4, ITGAM, ITGA9, ITGAV, SDCBP, ITGAD, TRIP6, INSR, ACVR1, CSF1R	997	56	6966	2.24581	0.480535	0.0280747	2.12817
GOTERM_CC_FAT	GO:0031226~intrinsic to plasma membrane	46	1.72478	0.00174431	C7, CAV1, ADORA3, ITGB4, ITGA11, ITGB5, TLR4, ITGB3, ITGAM, KCNMB1, EPHB1, SLC2A8, KCNS3, MUSK, SLC2A4, ITGAV, TEK, GPNMB, INSR, CSF1R, FCER1A, KCNMA1, KCND1, SLC6A12, AXL, SLC6A15, ITGA3, STAB2, ITGA4, ITPR3, ANKH, KDR, THY1, ITGA9, CYBA, P2RX7, SLC6A6, VAMP5, ROR2, PDGFRB, SDCBP, ITGAD, TRIP6, SCARA5, KCTD11, ACVR1	997	205	6966	1.56781	0.527143	0.0295142	2.42988
Annotation Cluster 23	Enrichment Score: 2.76135842146206
Category	Term	Count	%	PValue	Genes	List Total	Pop Hits	Pop Total	Fold Enrichment	Bonferroni	Benjamini	FDR
INTERPRO	IPR002181:Fibrinogen, alpha/beta/gamma chain, C-terminal globular	11	0.412448	0.000541431	FGG, TNXB, FGB, FCN2, TNC, FGL2, FGL1, MFAP4, ANGPTL2, ANGPT4, ANGPTL4	1514	20	9171	3.33161	0.654435	0.0730895	0.924758
INTERPRO	IPR014716:Fibrinogen, alpha/beta/gamma chain, C-terminal globular, subdomain 1	10	0.374953	0.000605607	FGG, TNXB, FGB, FCN2, FGL2, FGL1, MFAP4, ANGPTL2, ANGPT4, ANGPTL4	1514	17	9171	3.56321	0.695341	0.0761794	1.03383
UP_SEQ_FEATURE	domain:Fibrinogen C-terminal	8	0.299963	0.000803892	FGG, FGB, FCN2, FGL2, FGL1, MFAP4, ANGPT4, ANGPTL4	873	12	5635	4.30317	0.849035	0.270297	1.39893
SMART	SM00186:FBG	11	0.412448	0.00171665	FGG, TNXB, FGB, FCN2, TNC, FGL2, FGL1, MFAP4, ANGPTL2, ANGPT4, ANGPTL4	832	20	4364	2.88486	0.442428	0.110266	2.31256
INTERPRO	IPR014715:Fibrinogen, alpha/beta/gamma chain, C-terminal globular, subdomain 2	4	0.149981	0.0344821	FGG, FGB, FGL1, ANGPTL4	1514	5	9171	4.84597	1	0.783454	45.2268
Annotation Cluster 24	Enrichment Score: 2.6597766131093676
Category	Term	Count	%	PValue	Genes	List Total	Pop Hits	Pop Total	Fold Enrichment	Bonferroni	Benjamini	FDR
GOTERM_BP_FAT	GO:0005976~polysaccharide metabolic process	19	0.712411	0.000193519	GLT25D1, HEXA, CHI3L1, PGLYRP1, DCN, CERCAM, PPP1CB, PPP1R3C, LYVE1, PPP1R3B, PPP1R2, CHID1, BGN, AOAH, ITIH4, GAA, ITIH5, ITIH2, EXT1	1260	52	8785	2.54754	0.483929	0.0145927	0.352935
GOTERM_BP_FAT	GO:0006022~aminoglycan metabolic process	10	0.374953	0.0042554	LYVE1, CHID1, BGN, HEXA, CHI3L1, PGLYRP1, ITIH4, ITIH5, ITIH2, DCN	1260	24	8785	2.90509	1	0.152646	7.49474
GOTERM_BP_FAT	GO:0030203~glycosaminoglycan metabolic process	8	0.299963	0.0127352	LYVE1, BGN, HEXA, PGLYRP1, ITIH4, ITIH5, ITIH2, DCN	1260	19	8785	2.93567	1	0.310135	20.8753
Annotation Cluster 25	Enrichment Score: 2.6498721386847746
Category	Term	Count	%	PValue	Genes	List Total	Pop Hits	Pop Total	Fold Enrichment	Bonferroni	Benjamini	FDR
INTERPRO	IPR000886:Endoplasmic reticulum, targeting sequence	10	0.374953	0.00168059	P4HB, FKBP9, HSP90B1, GLT25D1, PDIA5, PDIA4, FKBP10, CERCAM, RCN3, PRKCSH	1514	19	9171	3.18814	0.96312	0.176443	2.8442
GOTERM_CC_FAT	GO:0005788~endoplasmic reticulum lumen	13	0.487439	0.00179317	P4HB, GLT25D1, ERP27, PDIA5, PDIA4, CERCAM, OS9, HSP90B1, DNAJB11, SUMF1, SIL1, RCN3, FKBP10	997	34	6966	2.67149	0.536968	0.0291796	2.49715
UP_SEQ_FEATURE	short sequence motif:Prevents secretion from ER	11	0.412448	0.0037265	P4HB, FKBP9, HSP90B1, GLT25D1, ERP27, PDIA5, PDIA4, FKBP10, CERCAM, RCN3, PRKCSH	873	26	5635	2.73086	0.999846	0.584277	6.33089
Annotation Cluster 26	Enrichment Score: 2.5796806200128355
Category	Term	Count	%	PValue	Genes	List Total	Pop Hits	Pop Total	Fold Enrichment	Bonferroni	Benjamini	FDR
GOTERM_MF_FAT	GO:0046332~SMAD binding	9	0.337458	0.00102458	FOS, TGFBR1, JUN, COL3A1, COL1A2, SMAD2, SMAD1, TGFB1I1, ACVR1	1384	16	9249	3.75908	0.664023	0.0530752	1.61919
GOTERM_BP_FAT	GO:0007179~transforming growth factor beta receptor signaling pathway	10	0.374953	0.00143054	FOS, ACVRL1, TGFBR1, JUN, COL3A1, COL1A2, SMAD2, SMAD1, TAB1, ACVR1	1260	21	8785	3.32011	0.992502	0.0704283	2.58133
GOTERM_BP_FAT	GO:0007178~transmembrane receptor protein serine/threonine kinase signaling pathway	13	0.487439	0.0124426	TWSG1, ACVRL1, TGFBR1, COL3A1, SMAD2, SMAD1, TAB1, FOS, ID1, JUN, COL1A2, TGFB1I1, ACVR1	1260	42	8785	2.15807	1	0.308524	20.4457
Annotation Cluster 27	Enrichment Score: 2.4999556264131875
Category	Term	Count	%	PValue	Genes	List Total	Pop Hits	Pop Total	Fold Enrichment	Bonferroni	Benjamini	FDR
UP_SEQ_FEATURE	domain:LIM zinc-binding 1	10	0.374953	0.0010391	LIMS2, PDLIM7, CRIP2, FHL3, LMCD1, FBLIM1, CSRP1, TGFB1I1, CSRP2, TRIP6	873	19	5635	3.39724	0.913204	0.294727	1.80473
UP_SEQ_FEATURE	domain:LIM zinc-binding 2	10	0.374953	0.0010391	LIMS2, PDLIM7, CRIP2, FHL3, LMCD1, FBLIM1, CSRP1, TGFB1I1, CSRP2, TRIP6	873	19	5635	3.39724	0.913204	0.294727	1.80473
INTERPRO	IPR001781:Zinc finger, LIM-type	16	0.599925	0.00334646	MICALL2, CRIP1, LIMS2, PDLIM7, CRIP2, FHL1, PDLIM4, FHL3, LMCD1, FBLIM1, PDLIM2, PDLIM1, CSRP1, CSRP2, TGFB1I1, TRIP6	1514	44	9171	2.20271	0.998608	0.268881	5.58817
SP_PIR_KEYWORDS	LIM domain	16	0.599925	0.00337111	MICALL2, CRIP1, LIMS2, PDLIM7, CRIP2, FHL1, PDLIM4, FHL3, LMCD1, FBLIM1, PDLIM2, PDLIM1, CSRP1, CSRP2, TGFB1I1, TRIP6	1215	44	7349	2.19948	0.819503	0.0820406	4.75546
UP_SEQ_FEATURE	domain:LIM zinc-binding 3	6	0.224972	0.00641594	LIMS2, PDLIM7, FHL3, FBLIM1, TGFB1I1, TRIP6	873	9	5635	4.30317	1	0.716641	10.663
SMART	SM00132:LIM	16	0.599925	0.0128036	MICALL2, CRIP1, LIMS2, PDLIM7, CRIP2, FHL1, PDLIM4, FHL3, LMCD1, FBLIM1, PDLIM2, PDLIM1, CSRP1, CSRP2, TGFB1I1, TRIP6	832	44	4364	1.90734	0.987491	0.354759	16.0948
Annotation Cluster 28	Enrichment Score: 2.4723254541046393
Category	Term	Count	%	PValue	Genes	List Total	Pop Hits	Pop Total	Fold Enrichment	Bonferroni	Benjamini	FDR
GOTERM_BP_FAT	GO:0010627~regulation of protein kinase cascade	29	1.08736	0.000151074	SH3RF1, CAV1, ADORA3, EDN1, TLR3, GJA1, TLR4, TIMP2, GPX1, TNFRSF1A, SORBS3, SQSTM1, HMOX1, SHISA5, NENF, INSR, APC, FCER1A, TNXB, CARD9, TGFBR1, LGALS1, IGF1, IGF2, FADD, ADIPOQ, P2RX7, MAP3K11, F2R	1260	97	8785	2.08448	0.403342	0.0122202	0.275627
GOTERM_BP_FAT	GO:0009967~positive regulation of signal transduction	33	1.23735	0.000433566	TWSG1, FKBP8, ADORA3, CSF1, TLR3, GJA1, TLR4, ADA, GPX1, TNFRSF1A, SORBS3, GPC3, RASGRP4, HMOX1, SHISA5, LBP, NENF, INSR, FCER1A, CARD9, TGFBR1, LGALS1, IGF1, IGF2, FADD, CTNNA1, ADIPOQ, CDKN1C, P2RX4, CDH13, P2RX7, TGFB1I1, F2R	1260	123	8785	1.8706	0.772874	0.0275795	0.789093
GOTERM_BP_FAT	GO:0010647~positive regulation of cell communication	34	1.27484	0.000493552	TWSG1, FKBP8, ADORA3, CSF1, SNCA, TLR3, GJA1, TLR4, ADA, GPX1, TNFRSF1A, SORBS3, GPC3, RASGRP4, HMOX1, SHISA5, LBP, NENF, INSR, FCER1A, CARD9, TGFBR1, LGALS1, IGF1, IGF2, FADD, CTNNA1, ADIPOQ, CDKN1C, CDH13, P2RX4, P2RX7, TGFB1I1, F2R	1260	129	8785	1.83764	0.814996	0.0307646	0.897803
GOTERM_BP_FAT	GO:0010740~positive regulation of protein kinase cascade	20	0.749906	0.00696234	CARD9, ADORA3, TGFBR1, LGALS1, TLR3, GJA1, IGF1, IGF2, FADD, TLR4, ADIPOQ, GPX1, TNFRSF1A, SORBS3, P2RX7, HMOX1, SHISA5, NENF, INSR, F2R	1260	74	8785	1.88438	1	0.218227	11.9825
GOTERM_BP_FAT	GO:0043122~regulation of I-kappaB kinase/NF-kappaB cascade	12	0.449944	0.0645607	TNFRSF1A, CARD9, SQSTM1, LGALS1, HMOX1, SHISA5, TLR3, GJA1, FADD, TLR4, ADIPOQ, F2R	1260	47	8785	1.78014	1	0.664272	70.4536
GOTERM_BP_FAT	GO:0043123~positive regulation of I-kappaB kinase/NF-kappaB cascade	11	0.412448	0.100866	TNFRSF1A, CARD9, LGALS1, HMOX1, SHISA5, TLR3, GJA1, FADD, TLR4, ADIPOQ, F2R	1260	45	8785	1.70432	1	0.771743	85.6631
Annotation Cluster 29	Enrichment Score: 2.3186810446891526
Category	Term	Count	%	PValue	Genes	List Total	Pop Hits	Pop Total	Fold Enrichment	Bonferroni	Benjamini	FDR
INTERPRO	IPR002035:von Willebrand factor, type A	16	0.599925	0.000426155	COCH, MATN2, VWA5A, COL21A1, CFB, ITGB5, ITGAM, VWF, COL6A2, ITIH4, ITIH5, ITIH2, CPNE3, ITGAD, C2, VWA1	1514	37	9171	2.61944	0.566687	0.0623048	0.728545
SMART	SM00327:VWA	16	0.599925	0.00195218	COCH, MATN2, VWA5A, COL21A1, CFB, ITGB5, ITGAM, VWF, COL6A2, ITIH4, ITIH5, ITIH2, CPNE3, ITGAD, C2, VWA1	832	37	4364	2.26819	0.485412	0.104821	2.62595
UP_SEQ_FEATURE	domain:VWFA	6	0.224972	0.133006	CFB, ITIH4, ITGB5, ITIH5, C2, VWA1	873	18	5635	2.15158	1	0.997759	91.793
Annotation Cluster 30	Enrichment Score: 2.2067351489442237
Category	Term	Count	%	PValue	Genes	List Total	Pop Hits	Pop Total	Fold Enrichment	Bonferroni	Benjamini	FDR
GOTERM_BP_FAT	GO:0034329~cell junction assembly	7	0.262467	0.00207151	CD9, ITGA5, BCL2, ITGB3, CTNNA1, THY1, FN1	1260	11	8785	4.43687	0.999165	0.093751	3.71736
GOTERM_BP_FAT	GO:0034330~cell junction organization	8	0.299963	0.0063704	CD9, ITGA5, BCL2, SMAD2, ITGB3, CTNNA1, THY1, FN1	1260	17	8785	3.28105	1	0.205413	11.0191
GOTERM_BP_FAT	GO:0007044~cell-substrate junction assembly	5	0.187477	0.0181694	ITGA5, BCL2, ITGB3, THY1, FN1	1260	8	8785	4.35764	1	0.377993	28.4645
Annotation Cluster 31	Enrichment Score: 2.1740459454256778
Category	Term	Count	%	PValue	Genes	List Total	Pop Hits	Pop Total	Fold Enrichment	Bonferroni	Benjamini	FDR
INTERPRO	IPR013787:S100/CaBP-9k-type, calcium binding, subdomain	10	0.374953	0.000333669	S100A4, S100A16, S100A8, S100B, S100A9, S100A11, S100A10, S100A14, S100A13, S100A12	1514	16	9171	3.78591	0.480437	0.053102	0.570858
INTERPRO	IPR001751:S100/CaBP-9k-type, calcium binding	10	0.374953	0.000333669	S100A4, S100A16, S100A8, S100B, S100A9, S100A11, S100A10, S100A14, S100A13, S100A12	1514	16	9171	3.78591	0.480437	0.053102	0.570858
UP_SEQ_FEATURE	calcium-binding region:1; low affinity	7	0.262467	0.00539125	S100A4, S100A16, S100A8, S100B, S100A9, S100A14, S100A12	873	12	5635	3.76527	0.999997	0.685061	9.03524
UP_SEQ_FEATURE	calcium-binding region:2; high affinity	7	0.262467	0.0087177	S100A4, S100A16, S100A8, S100B, S100A9, S100A14, S100A12	873	13	5635	3.47564	1	0.77016	14.22
PIR_SUPERFAMILY	PIRSF002353:S-100 protein	6	0.224972	0.0410569	S100A4, S100A8, S100B, S100A10, S100A13, S100A12	671	12	3890	2.89866	1	0.996457	46.6824
UP_SEQ_FEATURE	domain:EF-hand 1	19	0.712411	0.0487071	GPD2, S100A4, FKBP9, S100A16, HPCAL1, S100A8, S100A9, FSTL1, CAPN2, PRKCSH, S100A14, S100A13, S100A12, S100B, PVALB, FKBP10, RCN3, SDF4, CIB1	873	78	5635	1.57231	1	0.974486	58.3021
SP_PIR_KEYWORDS	EF hand	8	0.299963	0.0578066	S100A4, HPCAL1, S100A8, S100B, S100A9, S100A10, SPARC, MYL9	1215	22	7349	2.19948	1	0.473931	57.6476
Annotation Cluster 32	Enrichment Score: 2.162050201754066
Category	Term	Count	%	PValue	Genes	List Total	Pop Hits	Pop Total	Fold Enrichment	Bonferroni	Benjamini	FDR
GOTERM_CC_FAT	GO:0016327~apicolateral plasma membrane	20	0.749906	0.00016745	B4GALT1, MICALL2, F11R, PARD3, CLDN3, CLDN5, LIN7C, MPP7, CLDN11, CTNNA1, AMOTL2, CDH5, PNN, FZD6, JUP, TJP1, CGN, PVRL2, RAB13, TJP2	997	56	6966	2.49534	0.0693219	0.00511842	0.235679
GOTERM_CC_FAT	GO:0043296~apical junction complex	19	0.712411	0.000410184	B4GALT1, MICALL2, F11R, PARD3, CLDN3, CLDN5, LIN7C, MPP7, CLDN11, CTNNA1, AMOTL2, CDH5, PNN, JUP, TJP1, CGN, PVRL2, RAB13, TJP2	997	55	6966	2.41368	0.161386	0.00973042	0.576404
GOTERM_CC_FAT	GO:0005911~cell-cell junction	26	0.974878	0.00101484	PARD3, CLDN3, CLDN5, GJA1, CLDN11, GJA4, AMOTL2, CDH5, PNN, PVRL2, DLG5, MICALL2, B4GALT1, F11R, LIN7C, PCDH12, MPP7, CTNNA1, JUP, TJP1, P2RX7, ITGA5, CGN, RAB13, ADD3, TJP2	997	93	6966	1.95334	0.353115	0.0215439	1.42045
GOTERM_CC_FAT	GO:0070160~occluding junction	13	0.487439	0.00995569	MICALL2, F11R, PARD3, CLDN3, CLDN5, LIN7C, MPP7, CLDN11, AMOTL2, CDH5, TJP1, RAB13, TJP2	997	41	6966	2.21538	0.986328	0.115418	13.1493
GOTERM_CC_FAT	GO:0005923~tight junction	13	0.487439	0.00995569	MICALL2, F11R, PARD3, CLDN3, CLDN5, LIN7C, MPP7, CLDN11, AMOTL2, CDH5, TJP1, RAB13, TJP2	997	41	6966	2.21538	0.986328	0.115418	13.1493
GOTERM_CC_FAT	GO:0030054~cell junction	41	1.53731	0.0181082	PARD3, LIMS2, CLDN3, CLDN5, GRIK5, GJA1, CDH2, CLDN11, GJA4, AMOTL2, CDH5, PNN, RABAC1, SORBS3, PVRL2, DLG5, SNAP25, SCAMP5, B4GALT1, MICALL2, GABRD, F11R, FBLIM1, LIN7C, PCDH12, MPP7, CTNNA1, JUP, P2RX4, P2RX7, SDC1, TJP1, PGM5, CGN, ITGA5, TPRG1L, RAB13, TGFB1I1, TRIP6, TJP2, ADD3	997	202	6966	1.41815	0.999606	0.186416	22.7007
SP_PIR_KEYWORDS	Tight junction	7	0.262467	0.11913	F11R, CLDN3, CLDN5, LIN7C, MPP7, RAB13, CLDN11	1215	21	7349	2.01619	1	0.645577	83.9617
SP_PIR_KEYWORDS	cell junction	26	0.974878	0.339078	LIMS2, CLDN3, CLDN5, GRIK5, GJA1, CLDN11, GJA4, CDH5, ADA, PNN, RABAC1, SNAP25, SCAMP5, GABRD, F11R, STX1A, FBLIM1, LIN7C, MPP7, CTNNA1, JUP, PECAM1, TPRG1L, TGFB1I1, RAB13, TRIP6	1215	138	7349	1.13958	1	0.882631	99.7459
Annotation Cluster 33	Enrichment Score: 2.0695266737405205
Category	Term	Count	%	PValue	Genes	List Total	Pop Hits	Pop Total	Fold Enrichment	Bonferroni	Benjamini	FDR
GOTERM_BP_FAT	GO:0030336~negative regulation of cell migration	9	0.337458	0.00623578	PDGFB, APOE, BCL2, DLL4, RRAS, TIE1, ADA, IGFBP5, THY1	1260	21	8785	2.9881	1	0.205386	10.7986
GOTERM_BP_FAT	GO:0040013~negative regulation of locomotion	9	0.337458	0.00858968	PDGFB, APOE, BCL2, DLL4, RRAS, TIE1, ADA, IGFBP5, THY1	1260	22	8785	2.85227	1	0.25319	14.5806
GOTERM_BP_FAT	GO:0051271~negative regulation of cell motion	9	0.337458	0.0115492	PDGFB, APOE, BCL2, DLL4, RRAS, TIE1, ADA, IGFBP5, THY1	1260	23	8785	2.72826	1	0.296277	19.1207
Annotation Cluster 34	Enrichment Score: 2.0278756497278687
Category	Term	Count	%	PValue	Genes	List Total	Pop Hits	Pop Total	Fold Enrichment	Bonferroni	Benjamini	FDR
SP_PIR_KEYWORDS	Lectin	24	0.899888	7.24841e-05	LY75, APCS, OLR1, MASP1, LGALS1, CHI3L1, LGALS8, COLEC12, GALNTL1, CLEC11A, OS9, ASGR1, LPHN2, CLEC1A, CLEC3B, GALNTL4, FCN2, CD209, VCAN, PLA2R1, SELE, SELPLG, CLEC14A, LPHN1	1215	62	7349	2.34138	0.0360837	0.00305788	0.104533
INTERPRO	IPR016186:C-type lectin-like	19	0.712411	0.00287848	COL18A1, LY75, OLR1, ATRN, COLEC12, STAB2, CLEC11A, ASGR1, CLEC1A, LYVE1, CLEC12A, CLEC3B, CD69, CD209, MRCL, VCAN, PLA2R1, SELE, CLEC14A	1514	56	9171	2.05521	0.996503	0.246319	4.82479
INTERPRO	IPR001304:C-type lectin	16	0.599925	0.0102211	LY75, OLR1, ATRN, COLEC12, CLEC11A, CLEC1A, ASGR1, CLEC12A, CLEC3B, CD69, CD209, MRCL, VCAN, PLA2R1, SELE, CLEC14A	1514	49	9171	1.97795	1	0.500961	16.1586
SMART	SM00034:CLECT	16	0.599925	0.0344854	LY75, OLR1, ATRN, COLEC12, CLEC11A, CLEC1A, ASGR1, CLEC12A, CLEC3B, CD69, CD209, MRCL, VCAN, PLA2R1, SELE, CLEC14A	832	49	4364	1.71272	0.999993	0.600621	37.9919
INTERPRO	IPR018378:C-type lectin, conserved site	11	0.412448	0.0429025	ASGR1, CLEC1A, LY75, OLR1, CLEC3B, CD209, COLEC12, VCAN, PLA2R1, SELE, CLEC11A	1514	34	9171	1.95977	1	0.82723	52.8688
UP_SEQ_FEATURE	domain:C-type lectin	6	0.224972	0.215636	CLEC1A, OLR1, CLEC3B, COLEC12, VCAN, SELE	873	21	5635	1.84422	1	0.999847	98.5803
Annotation Cluster 35	Enrichment Score: 2.0079300383136247
Category	Term	Count	%	PValue	Genes	List Total	Pop Hits	Pop Total	Fold Enrichment	Bonferroni	Benjamini	FDR
GOTERM_CC_FAT	GO:0031410~cytoplasmic vesicle	54	2.02475	0.00591628	CLTA, CLTB, SYT4, PDIA4, RABAC1, SLC2A8, APP, MALL, APOA1, DYSF, SLC2A4, MAP1LC3A, C10H14ORF1, SEC24D, ALS2CL, RAB27A, SCAMP5, STX1A, ADAM10, ANP32E, STXBP2, MMP14, CHGA, BGN, SERPINF1, DOC2G, NEU1, ADAMTS1, CTSB, RAB13, STEAP2, PRF1, TF, PAM, YWHAZ, AHCY, NOSTRIN, SYPL2, ANXA6, CRISPLD2, GPNMB, SERPINA3-1, PLAT, P4HB, ICA1, ITPR3, ANXA2, VWF, LAMP1, HSP90B1, CAPG, TPRG1L, ATP6V0A2, ATP8A1	997	265	6966	1.42376	0.921576	0.0813537	8.02086
GOTERM_CC_FAT	GO:0031982~vesicle	55	2.06224	0.00692563	CLTA, CLTB, SYT4, PDIA4, RABAC1, SLC2A8, APP, MALL, APOA1, DYSF, SLC2A4, MAP1LC3A, C10H14ORF1, SEC24D, ALS2CL, RAB27A, SCAMP5, STX1A, ADAM10, ANP32E, STXBP2, MMP14, CHGA, BGN, SERPINF1, DOC2G, NEU1, ADAMTS1, CTSB, RAB13, STEAP2, PRF1, TF, PAM, YWHAZ, AHCY, NOSTRIN, SYPL2, ANXA6, CRISPLD2, GPNMB, SERPINA3-1, ASPSCR1, PLAT, P4HB, ICA1, ITPR3, ANXA2, VWF, LAMP1, HSP90B1, CAPG, TPRG1L, ATP6V0A2, ATP8…	997	273	6966	1.40763	0.94928	0.0889611	9.32804
GOTERM_CC_FAT	GO:0031988~membrane-bounded vesicle	45	1.68729	0.0145125	PRF1, TF, YWHAZ, CLTA, CLTB, AHCY, SYT4, NOSTRIN, PDIA4, SYPL2, ANXA6, RABAC1, MALL, APOA1, SLC2A4, CRISPLD2, C10H14ORF1, GPNMB, SERPINA3-1, SEC24D, ALS2CL, RAB27A, ASPSCR1, PLAT, P4HB, ICA1, STX1A, ADAM10, ANP32E, STXBP2, MMP14, ANXA2, LAMP1, VWF, HSP90B1, CHGA, BGN, SERPINF1, CAPG, DOC2G, NEU1, TPRG1L, CTSB, STEAP2, ATP6V0A2	997	223	6966	1.40992	0.998111	0.159877	18.6151
GOTERM_CC_FAT	GO:0016023~cytoplasmic membrane-bounded vesicle	44	1.64979	0.0156326	PRF1, TF, YWHAZ, CLTA, CLTB, AHCY, SYT4, NOSTRIN, PDIA4, SYPL2, ANXA6, RABAC1, MALL, APOA1, SLC2A4, CRISPLD2, C10H14ORF1, GPNMB, SERPINA3-1, SEC24D, ALS2CL, RAB27A, PLAT, P4HB, ICA1, STX1A, ADAM10, ANP32E, STXBP2, MMP14, ANXA2, LAMP1, VWF, HSP90B1, CHGA, BGN, SERPINF1, CAPG, DOC2G, NEU1, TPRG1L, CTSB, STEAP2, ATP6V0A2	997	218	6966	1.41021	0.99884	0.16697	19.9088
Annotation Cluster 36	Enrichment Score: 1.9707559384279392
Category	Term	Count	%	PValue	Genes	List Total	Pop Hits	Pop Total	Fold Enrichment	Bonferroni	Benjamini	FDR
GOTERM_CC_FAT	GO:0005581~collagen	11	0.412448	5.00856e-05	COL4A2, COL4A1, TNXB, COL27A1, LUM, COL3A1, COL1A2, COL1A1, COL11A2, COL4A6, COL4A5	997	18	6966	4.26981	0.021258	0.001789	0.0705478
GOTERM_MF_FAT	GO:0005201~extracellular matrix structural constituent	12	0.449944	6.64371e-05	COL18A1, COL4A2, COL4A1, COL27A1, FBN1, COL3A1, ELN, COL1A2, COL1A1, COL11A2, COL4A6, COL4A5	1384	21	9249	3.81874	0.0682506	0.00782383	0.105746
GOTERM_BP_FAT	GO:0030199~collagen fibril organization	9	0.337458	0.000233454	TNXB, TGFBR1, COL3A1, COL1A2, COL1A1, COL11A2, ADAMTS2, ANXA2, DPT	1260	14	8785	4.48214	0.549789	0.0171991	0.425622
GOTERM_CC_FAT	GO:0005583~fibrillar collagen	6	0.224972	0.000313287	TNXB, COL27A1, LUM, COL3A1, COL1A2, COL1A1	997	6	6966	6.98696	0.125778	0.00787594	0.440519
SP_PIR_KEYWORDS	hydroxylation	13	0.487439	0.00348119	COL4A2, EIF2C2, COL4A1, COL3A1, ELN, C1S, ADIPOQ, C1QA, C1QB, COL1A2, COL1A1, COL11A2, PROS1	1215	32	7349	2.45723	0.829333	0.0807457	4.90713
INTERPRO	IPR000885:Fibrillar collagen, C-terminal	5	0.187477	0.00835797	COL27A1, COL3A1, COL1A2, COL1A1, COL11A2	1514	6	9171	5.04789	1	0.456594	13.4096
GOTERM_BP_FAT	GO:0043588~skin development	7	0.262467	0.00917172	COL3A1, COL1A2, NGFR, COL1A1, ADAMTS2, APC, DHCR24	1260	14	8785	3.48611	1	0.26127	15.492
SMART	SM00038:COLFI	5	0.187477	0.0141264	COL27A1, COL3A1, COL1A2, COL1A1, COL11A2	832	6	4364	4.37099	0.992071	0.355802	17.6131
SP_PIR_KEYWORDS	triple helix	4	0.149981	0.0936174	COL4A1, COL3A1, COL1A2, COL1A1	1215	7	7349	3.45632	1	0.570297	75.786
SP_PIR_KEYWORDS	trimer	4	0.149981	0.0936174	COL4A1, COL3A1, COL1A2, COL1A1	1215	7	7349	3.45632	1	0.570297	75.786
UP_SEQ_FEATURE	propeptide:C-terminal propeptide	3	0.112486	0.115692	COL1A2, COL1A1, COL11A2	873	4	5635	4.84107	1	0.99572	88.3958
UP_SEQ_FEATURE	domain:Fibrillar collagen NC1	3	0.112486	0.115692	COL1A2, COL1A1, COL11A2	873	4	5635	4.84107	1	0.99572	88.3958
PIR_SUPERFAMILY	PIRSF002255:collagen alpha 1(I) chain	3	0.112486	0.139669	COL3A1, COL1A2, COL1A1	671	4	3890	4.34799	1	0.999999	89.531
UP_SEQ_FEATURE	region of interest:Triple-helical region	3	0.112486	0.357862	COL3A1, COL1A1, COL11A2	873	8	5635	2.42053	1	0.999996	99.9573
SP_PIR_KEYWORDS	hydroxyproline	3	0.112486	0.510443	COL3A1, COL1A2, COL11A2	1215	10	7349	1.81457	1	0.95473	99.9967
Annotation Cluster 37	Enrichment Score: 1.8453952562655134
Category	Term	Count	%	PValue	Genes	List Total	Pop Hits	Pop Total	Fold Enrichment	Bonferroni	Benjamini	FDR
INTERPRO	IPR001134:Netrin domain	10	0.374953	0.000170971	C4A, SFRP1, C3, SFRP2, SFRP4, TIMP2, TIMP3, PCOLCE, PCOLCE2, TIMP1	1514	15	9171	4.03831	0.285001	0.0365887	0.292891
INTERPRO	IPR018933:Netrin module, non-TIMP type	7	0.262467	0.00229454	C4A, SFRP1, C3, SFRP2, SFRP4, PCOLCE, PCOLCE2	1514	10	9171	4.24022	0.988969	0.211178	3.8641
SMART	SM00643:C345C	7	0.262467	0.00488168	C4A, SFRP1, C3, SFRP2, SFRP4, PCOLCE, PCOLCE2	832	10	4364	3.67163	0.810589	0.211554	6.44688
GOTERM_BP_FAT	GO:0016055~Wnt receptor signaling pathway	14	0.524934	0.063671	CSNK1A1, LZTS2, CSNK1G1, APC2, CALCOCO1, FZD6, FZD10, SFRP1, NXN, SFRP2, SFRP4, TGFB1I1, LRP5, APC	1260	58	8785	1.68295	1	0.660771	69.936
INTERPRO	IPR015526:Frizzled related	5	0.187477	0.0674411	FZD10, SFRP1, SFRP2, SFRP4, FZD6	1514	10	9171	3.02873	1	0.913386	69.814
SP_PIR_KEYWORDS	wnt signaling pathway	11	0.412448	0.11166	CSNK1A1, LZTS2, FZD10, NXN, CSNK1G1, SFRP1, SFRP2, SFRP4, TGFB1I1, CALCOCO1, FZD6	1215	40	7349	1.66335	1	0.626218	81.8835
INTERPRO	IPR000024:Frizzled cysteine-rich domain	4	0.149981	0.131608	FZD10, SFRP1, SFRP2, SFRP4	1514	8	9171	3.02873	1	0.97862	91.1143
Annotation Cluster 38	Enrichment Score: 1.8278224461674966
Category	Term	Count	%	PValue	Genes	List Total	Pop Hits	Pop Total	Fold Enrichment	Bonferroni	Benjamini	FDR
KEGG_PATHWAY	bta05210:Colorectal cancer	30	1.12486	1.08433e-05	APC2, TCF7L1, FOS, KRAS, CASP9, BCL2, PIK3CA, AXIN2, PIK3R1, APC, MSH6, FZD8, BRAF, PIK3CB, MSH2, TGFBR1, TGFBR2, LEF1, SMAD3, SMAD2, BAD, APPL1, FZD5, FZD6, MAPK1, FZD10, JUN, MAPK3, PDGFRA, PDGFRB	765	84	4940	2.30626	0.00192826	0.00038595	0.0133305
KEGG_PATHWAY	bta05223:Non-small cell lung cancer	18	0.674916	0.000884033	E2F1, E2F2, BRAF, PIK3CB, RXRA, CDK6, BAD, FOXO3, STK4, PRKCB, MAPK1, PDPK1, KRAS, PLCG1, CASP9, MAPK3, PIK3CA, PIK3R1	765	50	4940	2.32471	0.145661	0.0130333	1.08146
KEGG_PATHWAY	bta05213:Endometrial cancer	17	0.63742	0.001581	APC2, BRAF, PIK3CB, LEF1, BAD, FOXO3, CTNNA1, TCF7L1, MAPK1, PDPK1, KRAS, CASP9, MAPK3, PIK3CA, AXIN2, PIK3R1, APC	765	48	4940	2.28704	0.245455	0.0214317	1.9265
KEGG_PATHWAY	bta05215:Prostate cancer	24	0.899888	0.0033868	E2F1, E2F2, FGFR1, BRAF, PDGFB, PIK3CB, CREB1, IGF1, LEF1, BAD, TCF7L1, MAPK1, PDPK1, HSP90B1, KRAS, CASP9, BCL2, MAPK3, PDGFRA, PIK3CA, MDM2, PDGFRB, PDGFC, PIK3R1	765	84	4940	1.845	0.45331	0.0422168	4.08518
KEGG_PATHWAY	bta05214:Glioma	18	0.674916	0.00765477	E2F1, E2F2, BRAF, PDGFB, PIK3CB, IGF1, CDK6, PRKCB, MAPK1, KRAS, PLCG1, MAPK3, PDGFRA, PIK3CA, PDGFRB, MDM2, SHC1, PIK3R1	765	60	4940	1.93725	0.745331	0.0773066	9.01483
KEGG_PATHWAY	bta05212:Pancreatic cancer	19	0.712411	0.0110611	E2F1, E2F2, BRAF, PIK3CB, TGFBR1, ARHGEF6, TGFBR2, SMAD3, CDK6, SMAD2, BAD, STAT1, VEGFB, MAPK1, STAT4, KRAS, CASP9, MAPK3, PIK3CA, PIK3R1	765	67	4940	1.83124	0.861909	0.0942502	12.781
KEGG_PATHWAY	bta05218:Melanoma	18	0.674916	0.0202041	E2F1, FGFR1, E2F2, BRAF, PDGFB, PIK3CB, IGF1, CDK6, BAD, MAPK1, KRAS, MAPK3, PDGFRA, PIK3CA, PDGFRB, MDM2, PDGFC, PIK3R1	765	66	4940	1.76114	0.973567	0.158868	22.1933
KEGG_PATHWAY	bta05220:Chronic myeloid leukemia	18	0.674916	0.0559921	E2F1, E2F2, BRAF, PIK3CB, TGFBR1, CBL, TGFBR2, CDK6, BAD, PTPN11, MAPK1, CBLB, KRAS, MAPK3, MDM2, PIK3CA, SHC1, PIK3R1	765	74	4940	1.57075	0.999965	0.289569	50.7577
KEGG_PATHWAY	bta04960:Aldosterone-regulated sodium reabsorption	11	0.412448	0.078633	MAPK1, PDPK1, KRAS, PIK3CB, MAPK3, PIK3CA, IGF1, SLC9A3R2, INSR, PIK3R1, PRKCB	765	40	4940	1.77582	1	0.318611	63.4643
KEGG_PATHWAY	bta04150:mTOR signaling pathway	13	0.487439	0.0847205	CAB39L, BRAF, PIK3CB, IGF1, DDIT4, VEGFB, MAPK1, RPS6KA6, PDPK1, EIF4EBP1, MAPK3, PIK3CA, PIK3R1	765	51	4940	1.64603	1	0.325605	66.3238
KEGG_PATHWAY	bta04910:Insulin signaling pathway	26	0.974878	0.100329	PDE3B, PRKX, PPP1R3C, PDPK1, EIF4EBP1, PPP1R3B, KRAS, SLC2A4, PIK3CA, SH2B2, SHC1, PRKACB, INSR, PIK3R1, SOCS2, BRAF, PIK3CB, CBL, SOCS1, BAD, PCK2, PPP1CB, MAPK1, CBLB, PRKAR1B, MAPK3	765	125	4940	1.34316	1	0.335762	72.7428
KEGG_PATHWAY	bta05221:Acute myeloid leukemia	13	0.487439	0.132202	CEBPA, BRAF, PIK3CB, LEF1, BAD, TCF7L1, JUP, MAPK1, EIF4EBP1, KRAS, MAPK3, PIK3CA, PIK3R1	765	55	4940	1.52632	1	0.396371	82.506
KEGG_PATHWAY	bta04012:ErbB signaling pathway	17	0.63742	0.139793	BRAF, PIK3CB, CBL, BTC, BAD, PRKCB, MAPK1, CBLB, EIF4EBP1, KRAS, PLCG1, JUN, MAPK3, PIK3CA, SHC1, ABL2, PIK3R1	765	78	4940	1.40741	1	0.408776	84.2972
KEGG_PATHWAY	bta05211:Renal cell carcinoma	12	0.449944	0.423735	VEGFB, MAPK1, KRAS, EPAS1, BRAF, PIK3CB, JUN, ARNT2, MAPK3, PIK3CA, PIK3R1, PTPN11	765	65	4940	1.19216	1	0.706651	99.886
Annotation Cluster 39	Enrichment Score: 1.8063748873684442
Category	Term	Count	%	PValue	Genes	List Total	Pop Hits	Pop Total	Fold Enrichment	Bonferroni	Benjamini	FDR
GOTERM_BP_FAT	GO:0006468~protein amino acid phosphorylation	94	3.52456	9.18529e-05	CDK19, RNASEL, PRPF4B, ACVRL1, NUAK2, EFNA1, CCNT1, DSTYK, AURKB, FES, PRKX, PDPK1, PKN3, AAK1, CDK12, PIK3CA, TIE1, PRKACB, INSR, SIK2, CDK13, ADAM10, CSNK1G1, TRPM7, ROCK2, PKN2, PBK, STK4, WEE1, DAPK1, PRKCB, CDK3, PRKD1, PDIK1L, MAPK1, HIPK3, GADD45G, PDGFRA, NEK9, ROR2, PDGFRB, TXK, EIF2AK2, MELK, ACVR1, MAP3K11, FGFR1, FGR, NEK2, PTK7, STK17B, MAPKAPK3, RIOK1, MST4, TRIB2, EPHB1, MUSK, SPEG…	1260	448	8785	1.46292	0.269457	0.0086834	0.167666
GOTERM_BP_FAT	GO:0016310~phosphorylation	105	3.93701	0.000179068	RNASEL, PRPF4B, EFNA1, ATP6AP1, SNCA, DSTYK, AURKB, PRKX, AAK1, PIK3CA, PRKACB, INSR, CSNK1G1, PIK3CB, ROCK2, STK4, WEE1, MAPK1, PDGFRA, ROR2, PDGFRB, NEK9, EIF2AK2, FGFR1, FGR, NEK2, STK17B, MAPKAPK3, PTK7, RIOK1, MST4, EPHB1, ATP6V0B, ATP6V0C, MUSK, PRKRA, TEK, DYRK3, CSF1R, FCER1A, ITK, TGFBR1, BMX, OXSR1, KDR, PLK4, P2RX7, DYRK1B, GRK5, TNK2, MERTK, ABL2, ATP5D, CDK19, ACVRL1, NUAK2, CCNT1, F…	1260	521	8785	1.40515	0.457793	0.0138152	0.326621
GOTERM_MF_FAT	GO:0001882~nucleoside binding	203	7.61155	0.000529462	RAD51C, AURKB, PRKX, ACTG2, ERO1LB, PIK3CA, DHX33, DHX36, KIF5B, ROCK2, LIG4, NME4, MAPK1, ATP2C2, GLUL, NME3, PDGFRA, NEK9, PDGFRB, ROR2, EIF2AK2, NEK2, TDRD9, STK17B, UBA6, HSPA1A, OAS2, NAGK, MST4, TK2, EPHB1, MUSK, KIF3A, TGFBR1, ATP11B, ATP11A, YTHDC2, ATP11C, OXSR1, ATP13A2, KDR, OASL, ATP2A2, UBA2, GRK5, TNK2, CLCN7, ACVRL1, NUAK2, MYO7A, ATP10D, CKB, HSPH1, ANKRD17, FANCM, PDPK1, NOS3, NO…	1384	1099	9249	1.2344	0.430785	0.0394505	0.839824
GOTERM_MF_FAT	GO:0030554~adenyl nucleotide binding	200	7.49906	0.00059115	RAD51C, AURKB, PRKX, ACTG2, ERO1LB, PIK3CA, DHX33, DHX36, KIF5B, ROCK2, LIG4, NME4, MAPK1, ATP2C2, GLUL, NME3, PDGFRA, NEK9, PDGFRB, ROR2, EIF2AK2, NEK2, TDRD9, STK17B, UBA6, HSPA1A, OAS2, NAGK, MST4, TK2, EPHB1, MUSK, KIF3A, TGFBR1, ATP11B, ATP11A, YTHDC2, ATP11C, OXSR1, ATP13A2, KDR, OASL, ATP2A2, UBA2, GRK5, TNK2, CLCN7, ACVRL1, NUAK2, MYO7A, ATP10D, CKB, HSPH1, ANKRD17, FANCM, PDPK1, NOS3, NO…	1384	1083	9249	1.23413	0.466966	0.0410771	0.937242
GOTERM_MF_FAT	GO:0001883~purine nucleoside binding	201	7.53656	0.000722475	RAD51C, AURKB, PRKX, ACTG2, ERO1LB, PIK3CA, DHX33, DHX36, KIF5B, ROCK2, LIG4, NME4, MAPK1, ATP2C2, GLUL, NME3, PDGFRA, NEK9, PDGFRB, ROR2, EIF2AK2, NEK2, TDRD9, STK17B, UBA6, HSPA1A, OAS2, NAGK, MST4, TK2, EPHB1, MUSK, KIF3A, TGFBR1, ATP11B, ATP11A, YTHDC2, ATP11C, OXSR1, ATP13A2, KDR, OASL, ATP2A2, UBA2, GRK5, TNK2, CLCN7, ACVRL1, NUAK2, MYO7A, ATP10D, CKB, HSPH1, ANKRD17, FANCM, PDPK1, NOS3, NO…	1384	1093	9249	1.22895	0.536519	0.0442269	1.14433
GOTERM_MF_FAT	GO:0032559~adenyl ribonucleotide binding	189	7.08661	0.0010171	RAD51C, RNASEL, PRPF4B, ATP6AP1, IDE, DSTYK, AURKB, ACSS2, ACSS3, PRKX, ACTG2, OPLAH, AAK1, DHX33, PIK3CA, DHX36, DDX21, PRKACB, INSR, KIF5B, CSNK1G1, ROCK2, LIG4, STK4, CLPX, WEE1, NME4, MAPK1, GLUL, ATP2C2, NME3, SMARCA5, PDGFRA, NEK9, PDGFRB, ROR2, EIF2AK2, FGFR1, GCLC, FGR, ASS1, BLM, NEK2, TDRD9, PTK7, MAPKAPK3, STK17B, UBA6, HSPA1A, OAS2, RIOK1, NAGK, MST4, TK2, EPHB1, ABCA6, MUSK, DDX3X, E…	1384	1027	9249	1.22984	0.661335	0.0553931	1.60745
GOTERM_BP_FAT	GO:0006793~phosphorus metabolic process	121	4.53693	0.00113734	RNASEL, PRPF4B, EFNA1, ATP6AP1, STYX, SNCA, DSTYK, AURKB, PRKX, AAK1, PIK3CA, PRKACB, INSR, CSNK1G1, PIK3CB, ROCK2, PTPRH, PTPRR, PPP1CB, STK4, WEE1, PTPRQ, MAPK1, PDGFRA, ROR2, PDGFRB, NEK9, EIF2AK2, FGFR1, FGR, SSH1, NEK2, SSH2, PTK7, MAPKAPK3, STK17B, RIOK1, MST4, EPHB1, ATP6V0B, ATP6V0C, MUSK, PRKRA, TEK, DYRK3, CSF1R, FCER1A, GPD2, ITK, TGFBR1, BMX, OXSR1, KDR, PTPN11, PLK4, P2RX7, DUSP26, D…	1260	646	8785	1.30594	0.979547	0.0608089	2.05745
GOTERM_BP_FAT	GO:0006796~phosphate metabolic process	121	4.53693	0.00113734	RNASEL, PRPF4B, EFNA1, ATP6AP1, STYX, SNCA, DSTYK, AURKB, PRKX, AAK1, PIK3CA, PRKACB, INSR, CSNK1G1, PIK3CB, ROCK2, PTPRH, PTPRR, PPP1CB, STK4, WEE1, PTPRQ, MAPK1, PDGFRA, ROR2, PDGFRB, NEK9, EIF2AK2, FGFR1, FGR, SSH1, NEK2, SSH2, PTK7, MAPKAPK3, STK17B, RIOK1, MST4, EPHB1, ATP6V0B, ATP6V0C, MUSK, PRKRA, TEK, DYRK3, CSF1R, FCER1A, GPD2, ITK, TGFBR1, BMX, OXSR1, KDR, PTPN11, PLK4, P2RX7, DUSP26, D…	1260	646	8785	1.30594	0.979547	0.0608089	2.05745
GOTERM_MF_FAT	GO:0005524~ATP binding	187	7.01162	0.00123322	RAD51C, RNASEL, PRPF4B, ATP6AP1, IDE, DSTYK, AURKB, ACSS3, PRKX, ACTG2, OPLAH, AAK1, PIK3CA, DHX33, DHX36, DDX21, PRKACB, INSR, KIF5B, CSNK1G1, ROCK2, LIG4, STK4, CLPX, WEE1, NME4, MAPK1, GLUL, ATP2C2, NME3, SMARCA5, PDGFRA, NEK9, PDGFRB, ROR2, EIF2AK2, FGFR1, FGR, ASS1, BLM, NEK2, TDRD9, PTK7, MAPKAPK3, STK17B, UBA6, HSPA1A, OAS2, RIOK1, NAGK, MST4, TK2, EPHB1, ABCA6, MUSK, DDX3X, ENTPD8, TEK, D…	1384	1018	9249	1.22759	0.730977	0.0606074	1.94589
GOTERM_MF_FAT	GO:0004672~protein kinase activity	83	3.11211	0.00659777	CDK19, RNASEL, PRPF4B, ACVRL1, NUAK2, DSTYK, AURKB, FES, PRKX, PDPK1, PKN3, AAK1, CDK12, TIE1, PRKACB, INSR, SIK2, CDK13, CSNK1G1, TRPM7, ROCK2, PKN2, PBK, STK4, WEE1, PRKCB, CDK3, DAPK1, PRKD1, PDIK1L, MAPK1, HIPK3, PDGFRA, NEK9, ROR2, PDGFRB, TXK, EIF2AK2, MELK, ACVR1, MAP3K11, FGFR1, FGR, NEK2, PTK7, STK17B, MAPKAPK3, RIOK1, MST4, TRIB2, EPHB1, MUSK, SPEG, MAP3K2, TEK, BUB1, DYRK3, DCLK1, CSF1…	1384	423	9249	1.31128	0.999127	0.197564	10.0049
GOTERM_MF_FAT	GO:0017076~purine nucleotide binding	234	8.7739	0.00997557	RAD51C, AURKB, PRKX, ACTG2, ERO1LB, PIK3CA, DHX33, DHX36, RAB27A, GTPBP1, GBP5, KIF5B, ROCK2, IFI47, LIG4, GEM, NME4, MAPK1, GLUL, ATP2C2, NME3, PDGFRA, NEK9, PDGFRB, ROR2, RAB13, EIF2AK2, NEK2, TDRD9, STK17B, UBA6, HSPA1A, OAS2, NAGK, MST4, TK2, EPHB1, MUSK, MOCS1, KIF3A, TGFBR1, ATP11B, ATP11A, YTHDC2, ATP11C, OXSR1, ATP13A2, KDR, OASL, ATP2A2, UBA2, TNK2, GRK5, CLCN7, ACVRL1, NUAK2, MYO7A, ATP…	1384	1363	9249	1.1473	0.999977	0.276208	14.7562
GOTERM_MF_FAT	GO:0004674~protein serine/threonine kinase activity	56	2.09974	0.018268	CDK19, ACVRL1, PRPF4B, DSTYK, AURKB, PRKX, PDPK1, PKN3, AAK1, CDK12, PRKACB, SIK2, CDK13, CSNK1G1, ROCK2, TRPM7, PKN2, PBK, STK4, WEE1, CDK3, PRKCB, DAPK1, PRKD1, MAPK1, PDIK1L, HIPK3, NEK9, EIF2AK2, MELK, MAP3K11, ACVR1, NEK2, MAPKAPK3, STK17B, RIOK1, MST4, MAP3K2, SPEG, BUB1, DYRK3, DCLK1, CSNK1A1, NLK, TGFBR1, MAPK11, OXSR1, ATR, RPS6KA6, ICK, PLK4, MAPK12, MAPK13, DYRK1B, GRK5, CIT	1384	280	9249	1.33656	1	0.395284	25.4426
GOTERM_MF_FAT	GO:0032553~ribonucleotide binding	221	8.28646	0.0214683	RAD51C, AURKB, PRKX, ACTG2, PIK3CA, DHX33, DHX36, RAB27A, GTPBP1, GBP5, KIF5B, ROCK2, IFI47, LIG4, GEM, NME4, MAPK1, ATP2C2, GLUL, NME3, PDGFRA, NEK9, PDGFRB, ROR2, RAB13, EIF2AK2, NEK2, TDRD9, STK17B, UBA6, HSPA1A, OAS2, NAGK, MST4, TK2, EPHB1, MUSK, MOCS1, KIF3A, TGFBR1, ATP11B, ATP11A, YTHDC2, ATP11C, OXSR1, ATP13A2, KDR, OASL, ATP2A2, UBA2, GRK5, TNK2, CLCN7, ACVRL1, NUAK2, MYO7A, ATP10D, CKB…	1384	1304	9249	1.13259	1	0.438574	29.2202
GOTERM_MF_FAT	GO:0032555~purine ribonucleotide binding	221	8.28646	0.0214683	RAD51C, AURKB, PRKX, ACTG2, PIK3CA, DHX33, DHX36, RAB27A, GTPBP1, GBP5, KIF5B, ROCK2, IFI47, LIG4, GEM, NME4, MAPK1, ATP2C2, GLUL, NME3, PDGFRA, NEK9, PDGFRB, ROR2, RAB13, EIF2AK2, NEK2, TDRD9, STK17B, UBA6, HSPA1A, OAS2, NAGK, MST4, TK2, EPHB1, MUSK, MOCS1, KIF3A, TGFBR1, ATP11B, ATP11A, YTHDC2, ATP11C, OXSR1, ATP13A2, KDR, OASL, ATP2A2, UBA2, GRK5, TNK2, CLCN7, ACVRL1, NUAK2, MYO7A, ATP10D, CKB…	1384	1304	9249	1.13259	1	0.438574	29.2202
INTERPRO	IPR017441:Protein kinase, ATP binding site	42	1.5748	0.0220319	FGFR1, ACVRL1, PRPF4B, NUAK2, FGR, MAPKAPK3, STK17B, DSTYK, AURKB, FES, MST4, TEK, BUB1, DYRK3, PRKACB, TIE1, DCLK1, CSF1R, CSNK1A1, ITK, CSNK1G1, ROCK2, TGFBR1, HCK, MAPK11, OXSR1, STK4, WEE1, CDK3, PRKCB, MAPK1, PDIK1L, ICK, MAPK12, MAPK13, DYRK1B, TNK2, GRK5, EIF2AK2, MELK, MAP3K11, ACVR1	1514	183	9171	1.39024	1	0.693135	31.7625
UP_SEQ_FEATURE	active site:Proton acceptor	41	1.53731	0.0266438	XDH, ACOX1, PRPF4B, HSD17B14, IDE, ALDOB, PTGS1, MAPKAPK3, DSTYK, LSS, LTC4S, AURKB, FAH, ALDH1A1, SULT1A1, TEK, ALDH4A1, PRKACB, TIE1, CSNK1A1, PFKL, CSNK1G1, ACADS, ROCK2, TGFBR1, PM20D1, RNASE6, STK4, PRKCB, QPCT, MAPK1, PLK4, MAPK13, SUMF1, NEU1, TNK2, GRK5, NEU3, PHPT1, BRB, ACVR1	873	192	5635	1.37836	1	0.921099	37.6913
GOTERM_MF_FAT	GO:0000166~nucleotide binding	266	9.97375	0.0409936	RBPMS2, RAD51C, AURKB, PRKX, ACTG2, ERO1LB, SULT1A1, NT5C2, DHX33, PIK3CA, DHX36, RAB27A, GTPBP1, GBP5, KIF5B, ROCK2, IFI47, LIG4, GEM, NME4, MAPK1, GLUL, ATP2C2, NME3, PDGFRA, ROR2, NEK9, PDGFRB, RAB13, EIF2AK2, NEK2, TDRD9, STK17B, MYEF2, UBA6, HSPA1A, IGF2BP3, OAS2, NAGK, MST4, TK2, EPHB1, HNRNPA3, MUSK, MOCS1, KIF3A, TGFBR1, ATP11B, ATP11A, YTHDC2, ATP11C, OXSR1, ATP13A2, KDR, OASL, DHFR, ATP…	1384	1615	9249	1.1007	1	0.575341	48.6531
INTERPRO	IPR000719:Protein kinase, core	46	1.72478	0.0685332	FGFR1, RNASEL, ACVRL1, PRPF4B, NUAK2, NEK2, MAPKAPK3, STK17B, DSTYK, AURKB, FES, MST4, TRIB2, TEK, BUB1, DYRK3, PRKACB, TIE1, DCLK1, CSF1R, CSNK1A1, ITK, CSNK1G1, ROCK2, TGFBR1, HCK, MAPK11, OXSR1, PBK, STK4, WEE1, CDK3, PRKCB, KDR, MAPK1, PDIK1L, ICK, MAPK12, MAPK13, DYRK1B, TNK2, GRK5, EIF2AK2, MELK, MAP3K11, ACVR1	1514	220	9171	1.26656	1	0.913162	70.4147
UP_SEQ_FEATURE	binding site:ATP	24	0.899888	0.0762056	CSNK1A1, PRPF4B, CSNK1G1, ROCK2, TGFBR1, MAPKAPK3, DSTYK, AURKB, NAGK, STK4, ACSF2, PRKCB, CKB, GSS, MAPK1, PLK4, MAPK13, TEK, GRK5, TNK2, TIE1, PRKACB, GK5, ACVR1	873	110	5635	1.40831	1	0.990523	75.0565
SP_PIR_KEYWORDS	kinase	54	2.02475	0.0773845	PRPF4B, NUAK2, DSTYK, AURKB, FES, CKB, PIK3CA, TIE1, PRKACB, IPMK, PFKL, CSNK1G1, ROCK2, PIK3CB, STK4, PRKCB, MAPK1, PANK3, NME3, TXK, EIF2AK2, MELK, MAP3K11, ACVR1, FGFR1, FGR, NEK2, MAPKAPK3, STK17B, DCK, NAGK, GALK1, PRKRA, TEK, GK5, DCLK1, CSF1R, CSNK1A1, ITK, HCK, TGFBR1, AK1, MAPK11, PCK2, KDR, CDKN1C, PLK4, MAPK12, MAPK13, DYRK1B, PRKAR1B, TNK2, GRK5, PLAU	1215	266	7349	1.2279	1	0.524057	68.7176
UP_SEQ_FEATURE	domain:Protein kinase	20	0.749906	0.0776681	CSNK1A1, PRPF4B, CSNK1G1, ROCK2, TGFBR1, MAPKAPK3, DSTYK, AURKB, STK4, TRIB2, PRKCB, MAPK1, PLK4, MAPK13, TEK, GRK5, TNK2, TIE1, PRKACB, ACVR1	873	88	5635	1.46699	1	0.990304	75.7393
UP_SEQ_FEATURE	nucleotide phosphate-binding region:ATP	42	1.5748	0.100195	PRPF4B, ASS1, DICER1, MAPKAPK3, DCK, DSTYK, AURKB, NAGK, ACSF2, CKB, GSS, GALK1, TEK, GK5, PRKACB, TIE1, ERCC6L, KIF2A, CSNK1A1, PFKL, CSNK1G1, ROCK2, MSH2, TGFBR1, AK1, MYO1D, STK4, SMC3, PRKCB, MCM6, TOR2A, MAPK1, PLK4, MAPK13, TOM1, TNK2, GRK5, SMC1A, CLCN7, ATP8A1, ACVR1, MYH10	873	218	5635	1.24358	1	0.994322	84.2681
INTERPRO	IPR017442:Serine/threonine protein kinase-related	36	1.34983	0.139874	RNASEL, ACVRL1, PRPF4B, NUAK2, NEK2, MAPKAPK3, STK17B, DSTYK, AURKB, MST4, TRIB2, DYRK3, PRKACB, DCLK1, CSNK1A1, CSNK1G1, ROCK2, TGFBR1, MAPK11, OXSR1, PBK, STK4, WEE1, CDK3, PRKCB, PDIK1L, MAPK1, ICK, MAPK12, MAPK13, DYRK1B, GRK5, EIF2AK2, MELK, MAP3K11, ACVR1	1514	177	9171	1.23203	1	0.981592	92.4589
SP_PIR_KEYWORDS	serine/threonine-protein kinase	31	1.16235	0.147439	PRPF4B, ACVRL1, MAPKAPK3, STK17B, DSTYK, AURKB, BUB1, DYRK3, PRKACB, DCLK1, CSNK1A1, CSNK1G1, ROCK2, TGFBR1, MAPK11, STK4, WEE1, PRKCB, CDK3, PDIK1L, MAPK1, ICK, PLK4, MAPK12, MAPK13, DYRK1B, GRK5, EIF2AK2, MELK, ACVR1, MAP3K11	1215	150	7349	1.25004	1	0.654962	89.9892
SP_PIR_KEYWORDS	atp-binding	96	3.59955	0.237897	PRPF4B, ATP6AP1, IDE, DSTYK, AURKB, ACSS3, ACTG2, OPLAH, PIK3CA, DDX21, DHX36, PRKACB, KIF5B, CSNK1G1, ROCK2, STK4, WEE1, MAPK1, GLUL, NME3, EIF2AK2, FGFR1, ASS1, FGR, MAPKAPK3, STK17B, HSPA1A, NAGK, MST4, TEK, ENTPD8, DYRK3, ENTPD1, ERCC6L, CSF1R, ITK, KIF3A, TGFBR1, AK1, MYO1D, ABCB1, OXSR1, PLK4, ATP2A2, DYRK1B, UBA2, MYH11, TNK2, GRK5, SMC1A, CLCN7, MYH10, KIF23, ACVRL1, NUAK2, DICER1, ATP10D…	1215	537	7349	1.08131	1	0.80597	98.0156
INTERPRO	IPR008271:Serine/threonine protein kinase, active site	30	1.12486	0.268898	PRPF4B, ACVRL1, NEK2, MAPKAPK3, STK17B, DSTYK, AURKB, BUB1, DYRK3, PRKACB, DCLK1, CSNK1A1, CSNK1G1, ROCK2, TGFBR1, PBK, STK4, WEE1, PRKCB, CDK3, PDIK1L, MAPK1, ICK, MAPK13, DYRK1B, GRK5, EIF2AK2, MELK, ACVR1, MAP3K11	1514	156	9171	1.1649	1	0.99834	99.5359
INTERPRO	IPR002290:Serine/threonine protein kinase	22	0.824897	0.295189	PRPF4B, NEK2, ROCK2, MAPKAPK3, STK17B, MAPK11, AURKB, OXSR1, STK4, MST4, PRKCB, CDK3, MAPK1, ICK, MAPK12, MAPK13, DYRK1B, DYRK3, GRK5, PRKACB, DCLK1, MELK	1514	112	9171	1.18986	1	0.998955	99.7524
SMART	SM00220:S_TKc	22	0.824897	0.570782	PRPF4B, NEK2, ROCK2, MAPKAPK3, STK17B, MAPK11, AURKB, OXSR1, STK4, MST4, PRKCB, CDK3, MAPK1, ICK, MAPK12, MAPK13, DYRK1B, DYRK3, GRK5, PRKACB, DCLK1, MELK	832	112	4364	1.03031	1	0.995599	99.999
SP_PIR_KEYWORDS	nucleotide-binding	120	4.49944	0.732769	PRPF4B, ATP6AP1, IDE, RRAD, DSTYK, AURKB, ACSS3, ACTG2, OPLAH, NT5C2, PIK3CA, RRAS, DHX36, PRKACB, MX1, MX2, RAB27A, GTPBP1, CSNK1G1, KIF5B, ROCK2, GEM, STK4, WEE1, MAPK1, GLUL, NME3, RAB13, EIF2AK2, FGFR1, RAB7B, FGR, ASS1, MAPKAPK3, STK17B, HSPA1A, NAGK, MST4, TEK, ENTPD8, DYRK3, ENTPD1, ERCC6L, CSF1R, MOCS1, ITK, KIF3A, RAB8B, AK1, TGFBR1, MYO1D, ABCB1, OXSR1, PLK4, ATP2A2, UBA2, DYRK1B, MYH11…	1215	754	7349	0.962635	1	0.987743	100
Annotation Cluster 40	Enrichment Score: 1.7932907696532667
Category	Term	Count	%	PValue	Genes	List Total	Pop Hits	Pop Total	Fold Enrichment	Bonferroni	Benjamini	FDR
GOTERM_MF_FAT	GO:0019838~growth factor binding	19	0.712411	0.000252806	A2M, IGFBP7, TGFBR1, IGFBP6, COL3A1, KDR, NOV, CEP57, CTGF, PDGFRA, PDGFRB, COL1A1, NGFR, INSR, IGFBP3, IGFBP4, IGFBP5, CYR61, ACVR1	1384	51	9249	2.48967	0.235872	0.0241597	0.401825
INTERPRO	IPR000867:Insulin-like growth factor-binding protein, IGFBP	8	0.299963	0.00223778	NOV, CTGF, IGFBP7, IGFBP6, IGFBP3, IGFBP4, IGFBP5, CYR61	1514	13	9171	3.72767	0.987667	0.216662	3.77023
SMART	SM00121:IB	8	0.299963	0.00520272	NOV, CTGF, IGFBP7, IGFBP6, IGFBP3, IGFBP4, IGFBP5, CYR61	832	13	4364	3.22781	0.830269	0.198838	6.85704
GOTERM_MF_FAT	GO:0005520~insulin-like growth factor binding	9	0.337458	0.0057527	NOV, CTGF, IGFBP7, IGFBP6, IGFBP3, INSR, IGFBP4, IGFBP5, CYR61	1384	20	9249	3.00726	0.997842	0.179645	8.778
INTERPRO	IPR000716:Thyroglobulin type-1	7	0.262467	0.0119907	SMOC2, IGFBP6, NID1, NID2, IGFBP3, IGFBP4, IGFBP5	1514	13	9171	3.26171	1	0.533959	18.6932
INTERPRO	IPR017891:Insulin-like growth factor binding protein, N-terminal	5	0.187477	0.0169662	CTGF, IGFBP6, IGFBP3, IGFBP4, IGFBP5	1514	7	9171	4.32676	1	0.627476	25.4387
UP_SEQ_FEATURE	domain:IGFBP N-terminal	5	0.187477	0.0236899	CTGF, IGFBP6, IGFBP3, IGFBP4, IGFBP5	873	8	5635	4.03422	1	0.904493	34.2946
SMART	SM00211:TY	7	0.262467	0.0237362	SMOC2, IGFBP6, NID1, NID2, IGFBP3, IGFBP4, IGFBP5	832	13	4364	2.82433	0.999716	0.493705	27.9013
GOTERM_BP_FAT	GO:0001558~regulation of cell growth	13	0.487439	0.0769844	ADAM10, TGFBR1, IGFBP7, IGFBP6, SMAD2, NOV, CTGF, CXCL16, BCL2, IGFBP3, IGFBP4, CYR61, IGFBP5	1260	54	8785	1.6785	1	0.708697	76.8565
UP_SEQ_FEATURE	domain:Thyroglobulin type-1	4	0.149981	0.0796168	IGFBP6, IGFBP3, IGFBP4, IGFBP5	873	7	5635	3.68843	1	0.990382	76.6217
SP_PIR_KEYWORDS	Growth factor binding	4	0.149981	0.131988	IGFBP6, IGFBP3, IGFBP4, IGFBP5	1215	8	7349	3.02428	1	0.630921	87.0277
INTERPRO	IPR009168:Insulin-like growth factor binding protein	3	0.112486	0.192956	IGFBP6, IGFBP3, IGFBP4	1514	5	9171	3.63448	1	0.993311	97.4716
Annotation Cluster 41	Enrichment Score: 1.7522708794773607
Category	Term	Count	%	PValue	Genes	List Total	Pop Hits	Pop Total	Fold Enrichment	Bonferroni	Benjamini	FDR
GOTERM_BP_FAT	GO:0042592~homeostatic process	71	2.66217	0.00238344	GNA15, ATOX1, HEXA, PPARG, EDN1, SNCA, PRDX4, PDIA5, FOXO3, PDIA4, CKB, AGTR1, GPX1, APP, APOA1, SLC2A4, APOE, NMUR2, HMOX1, COL4A3BP, RGN, QKI, FAS, COL11A2, INSR, TERT, FTL, KCNMA1, PIK3CB, ACO1, PRKCB, TXNDC5, F2, GAA, PDGFRB, TF, RBP4, CAV1, GCLC, CSF1, PTH1R, TMX3, CLDN11, TRIM10, SYPL2, TIMP1, CD9, BCL2, APOC4, TCEA1, DYRK3, QSOX1, APC, ASPSCR1, P4HB, EPAS1, IGF1, BAD, SMAD1, ADIPOQ, KDR, D…	1260	353	8785	1.40234	0.999713	0.101762	4.26568
GOTERM_BP_FAT	GO:0048878~chemical homeostasis	47	1.76228	0.00382637	RBP4, TF, GNA15, CAV1, GCLC, ATOX1, HEXA, PPARG, PTH1R, EDN1, SNCA, CLDN11, FOXO3, SYPL2, CKB, CD9, AGTR1, APP, APOA1, SLC2A4, APOE, APOC4, HMOX1, COL4A3BP, BCL2, NMUR2, QKI, RGN, INSR, FTL, ASPSCR1, KCNMA1, EPAS1, PIK3CB, ACO1, IGF1, BAD, ADIPOQ, PRKCB, KDR, P2RX4, P2RX7, TSC1, ATP2A2, F2, SCARA5, F2R	1260	218	8785	1.50319	0.999998	0.141327	6.7639
GOTERM_BP_FAT	GO:0055066~di-, tri-valent inorganic cation homeostasis	24	0.899888	0.00689666	TF, GNA15, CAV1, PIK3CB, ATOX1, ACO1, EDN1, PTH1R, SYPL2, PRKCB, KDR, AGTR1, APP, P2RX7, ATP2A2, APOE, HMOX1, BCL2, NMUR2, F2, RGN, SCARA5, FTL, F2R	1260	95	8785	1.7614	1	0.218391	11.8761
GOTERM_BP_FAT	GO:0055074~calcium ion homeostasis	17	0.63742	0.012058	GNA15, CAV1, PIK3CB, PTH1R, EDN1, SYPL2, PRKCB, KDR, AGTR1, P2RX7, ATP2A2, APOE, BCL2, NMUR2, F2, RGN, F2R	1260	62	8785	1.91174	1	0.304918	19.8778
GOTERM_BP_FAT	GO:0055065~metal ion homeostasis	18	0.674916	0.0135751	KCNMA1, GNA15, CAV1, PIK3CB, PTH1R, EDN1, SYPL2, PRKCB, KDR, AGTR1, P2RX7, ATP2A2, APOE, BCL2, NMUR2, F2, RGN, F2R	1260	68	8785	1.84559	1	0.320294	22.096
GOTERM_BP_FAT	GO:0030005~cellular di-, tri-valent inorganic cation homeostasis	22	0.824897	0.0164722	TF, GNA15, CAV1, PIK3CB, ATOX1, ACO1, PTH1R, EDN1, SYPL2, PRKCB, AGTR1, APP, P2RX7, ATP2A2, APOE, BCL2, NMUR2, F2, RGN, SCARA5, FTL, F2R	1260	91	8785	1.68559	1	0.360466	26.1715
GOTERM_BP_FAT	GO:0006875~cellular metal ion homeostasis	17	0.63742	0.0188862	KCNMA1, GNA15, CAV1, PIK3CB, PTH1R, EDN1, SYPL2, PRKCB, AGTR1, P2RX7, ATP2A2, APOE, BCL2, NMUR2, F2, RGN, F2R	1260	65	8785	1.8235	1	0.385132	29.4126
GOTERM_BP_FAT	GO:0006874~cellular calcium ion homeostasis	16	0.599925	0.0197033	GNA15, CAV1, PIK3CB, PTH1R, EDN1, SYPL2, PRKCB, AGTR1, P2RX7, ATP2A2, APOE, BCL2, NMUR2, F2, RGN, F2R	1260	60	8785	1.85926	1	0.389139	30.4789
GOTERM_BP_FAT	GO:0030003~cellular cation homeostasis	23	0.862392	0.0218295	KCNMA1, TF, GNA15, CAV1, PIK3CB, ATOX1, ACO1, PTH1R, EDN1, SYPL2, PRKCB, AGTR1, APP, P2RX7, ATP2A2, APOE, BCL2, NMUR2, F2, RGN, SCARA5, FTL, F2R	1260	99	8785	1.61981	1	0.409951	33.1824
GOTERM_BP_FAT	GO:0006873~cellular ion homeostasis	32	1.19985	0.0226487	TF, GNA15, CAV1, GCLC, ATOX1, HEXA, PTH1R, EDN1, SNCA, CLDN11, SYPL2, CKB, CD9, AGTR1, APP, APOE, BCL2, NMUR2, QKI, RGN, FTL, KCNMA1, PIK3CB, ACO1, PRKCB, P2RX4, P2RX7, TSC1, ATP2A2, F2, SCARA5, F2R	1260	151	8785	1.47756	1	0.415106	34.1973
GOTERM_BP_FAT	GO:0055082~cellular chemical homeostasis	32	1.19985	0.0268535	TF, GNA15, CAV1, GCLC, ATOX1, HEXA, PTH1R, EDN1, SNCA, CLDN11, SYPL2, CKB, CD9, AGTR1, APP, APOE, BCL2, NMUR2, QKI, RGN, FTL, KCNMA1, PIK3CB, ACO1, PRKCB, P2RX4, P2RX7, TSC1, ATP2A2, F2, SCARA5, F2R	1260	153	8785	1.45824	1	0.451331	39.1814
GOTERM_BP_FAT	GO:0019725~cellular homeostasis	42	1.5748	0.0315468	TF, GNA15, CAV1, GCLC, ATOX1, HEXA, TMX3, PTH1R, EDN1, SNCA, PRDX4, PDIA5, CLDN11, PDIA4, SYPL2, CKB, CD9, AGTR1, APP, APOE, BCL2, NMUR2, QKI, RGN, QSOX1, FTL, APC, KCNMA1, P4HB, PIK3CB, ACO1, PRKCB, P2RX4, P2RX7, TSC1, NXN, ATP2A2, TXNDC5, F2, GAA, SCARA5, F2R	1260	215	8785	1.36202	1	0.491516	44.3223
GOTERM_BP_FAT	GO:0050801~ion homeostasis	34	1.27484	0.0344583	TF, GNA15, CAV1, GCLC, ATOX1, HEXA, PTH1R, EDN1, SNCA, CLDN11, SYPL2, CKB, CD9, AGTR1, APP, APOE, HMOX1, BCL2, NMUR2, QKI, RGN, FTL, KCNMA1, PIK3CB, ACO1, PRKCB, KDR, P2RX4, P2RX7, TSC1, ATP2A2, F2, SCARA5, F2R	1260	168	8785	1.41104	1	0.514231	47.3022
GOTERM_BP_FAT	GO:0055080~cation homeostasis	25	0.937383	0.0346739	TF, CAV1, GNA15, ATOX1, EDN1, PTH1R, SYPL2, AGTR1, APP, APOE, NMUR2, BCL2, HMOX1, RGN, FTL, KCNMA1, ACO1, PIK3CB, KDR, PRKCB, P2RX7, ATP2A2, F2, SCARA5, F2R	1260	115	8785	1.5157	1	0.512258	47.5167
GOTERM_BP_FAT	GO:0051480~cytosolic calcium ion homeostasis	8	0.299963	0.164631	AGTR1, P2RX7, GNA15, CAV1, NMUR2, F2, EDN1, F2R	1260	32	8785	1.74306	1	0.869435	96.2602
Annotation Cluster 42	Enrichment Score: 1.6614167462762752
Category	Term	Count	%	PValue	Genes	List Total	Pop Hits	Pop Total	Fold Enrichment	Bonferroni	Benjamini	FDR
INTERPRO	IPR011042:Six-bladed beta-propeller, TolB-like	9	0.337458	0.00734838	PAM, TRIM3, PON1, RGN, LRP8, NID1, NID2, VLDLR, LRP5	1514	19	9171	2.86932	0.999999	0.439446	11.8848
INTERPRO	IPR000033:Low-density lipoprotein receptor, YWTD repeat	5	0.187477	0.0295501	LRP8, NID1, NID2, VLDLR, LRP5	1514	8	9171	3.78591	1	0.761979	40.2239
SMART	SM00135:LY	5	0.187477	0.0477528	LRP8, NID1, NID2, VLDLR, LRP5	832	8	4364	3.27825	1	0.646466	48.641
Annotation Cluster 43	Enrichment Score: 1.63565800980928
Category	Term	Count	%	PValue	Genes	List Total	Pop Hits	Pop Total	Fold Enrichment	Bonferroni	Benjamini	FDR
GOTERM_CC_FAT	GO:0042598~vesicular fraction	21	0.787402	0.00170407	ASPSCR1, P4HB, TBXAS1, CYP2D14, CYP51A1, HMGCR, PTGS1, CYB5A, CYP1A2, ITPR3, POR, ATP2A2, SLC2A4, PTGES, HMOX1, BCL2, STEAP2, GULO, INSR, DDOST, MGST1	997	71	6966	2.06657	0.518895	0.0300262	2.37445
GOTERM_CC_FAT	GO:0005792~microsome	20	0.749906	0.00349103	ASPSCR1, P4HB, TBXAS1, CYP2D14, CYP51A1, HMGCR, PTGS1, CYB5A, CYP1A2, ITPR3, POR, ATP2A2, SLC2A4, PTGES, HMOX1, BCL2, GULO, INSR, DDOST, MGST1	997	70	6966	1.99627	0.776931	0.0540501	4.80806
GOTERM_CC_FAT	GO:0000267~cell fraction	46	1.72478	0.025618	CAV1, CYP2D14, HMGCR, CYP51A1, SNCA, PTGS1, FOXO3, NAGK, ATF2, APLP1, ACTG2, DES, SLC2A4, RASGRP4, PTGES, HMOX1, BCL2, ENTPD8, PEX13, EHD2, DDOST, SDF4, SNAP25, INSR, HSD17B8, ASPSCR1, P4HB, STX1A, TBXAS1, ACTA2, PKIG, LIN7C, ITGA3, CYB5A, CYP1A2, ITPR3, POR, P2RX7, TSC1, ATP2A2, ITGA5, ARSA, HSPB2, DNTTIP2, GULO, STEAP2, MGST1	997	237	6966	1.35612	0.999985	0.232855	30.6264
GOTERM_CC_FAT	GO:0005624~membrane fraction	39	1.46232	0.0489638	CAV1, CYP2D14, HMGCR, CYP51A1, SNCA, PTGS1, FOXO3, ATF2, APLP1, SLC2A4, RASGRP4, PTGES, BCL2, HMOX1, ENTPD8, PEX13, EHD2, DDOST, SNAP25, INSR, HSD17B8, ASPSCR1, P4HB, STX1A, TBXAS1, LIN7C, ITGA3, CYB5A, CYP1A2, ITPR3, POR, P2RX7, ATP2A2, TSC1, ITGA5, ARSA, GULO, STEAP2, MGST1	997	204	6966	1.33574	1	0.344461	50.7059
GOTERM_CC_FAT	GO:0005626~insoluble fraction	40	1.49981	0.0548504	CAV1, CYP2D14, HMGCR, CYP51A1, SNCA, PTGS1, FOXO3, ATF2, APLP1, DES, SLC2A4, RASGRP4, PTGES, BCL2, HMOX1, ENTPD8, PEX13, EHD2, DDOST, SNAP25, INSR, HSD17B8, ASPSCR1, P4HB, STX1A, TBXAS1, LIN7C, ITGA3, CYB5A, CYP1A2, ITPR3, POR, P2RX7, ATP2A2, TSC1, ITGA5, ARSA, GULO, STEAP2, MGST1	997	212	6966	1.31829	1	0.366578	54.8351
SP_PIR_KEYWORDS	microsome	7	0.262467	0.374983	CYP2D14, CYP51A1, HMOX1, PTGS1, CYB5A, GULO, MGST1	1215	30	7349	1.41133	1	0.898848	99.8865
Annotation Cluster 44	Enrichment Score: 1.6282122170245843
Category	Term	Count	%	PValue	Genes	List Total	Pop Hits	Pop Total	Fold Enrichment	Bonferroni	Benjamini	FDR
GOTERM_BP_FAT	GO:0051130~positive regulation of cellular component organization	22	0.824897	4.81191e-05	C3, ROCK2, TGFBR1, SNCA, EDN1, NUSAP1, IGF1, IGF2, SMAD2, DSTN, PLK4, CDC42EP2, CDC42EP1, TSC1, FCGR1A, SEMA4D, TGFB1I1, CDC42EP4, SELE, INSR, PIK3R1, APC	1260	60	8785	2.55648	0.151661	0.00512665	0.0878687
GOTERM_MF_FAT	GO:0005159~insulin-like growth factor receptor binding	6	0.224972	0.000390397	YWHAG, SOCS2, IGF1, IGF2, INSR, PIK3R1	1384	6	9249	6.6828	0.339966	0.0314535	0.619885
GOTERM_BP_FAT	GO:0010638~positive regulation of organelle organization	10	0.374953	0.0042554	CDC42EP2, PLK4, ROCK2, EDN1, NUSAP1, IGF1, IGF2, INSR, APC, DSTN	1260	24	8785	2.90509	1	0.152646	7.49474
GOTERM_BP_FAT	GO:0045840~positive regulation of mitosis	5	0.187477	0.0290479	EDN1, NUSAP1, IGF1, IGF2, INSR	1260	9	8785	3.87346	1	0.469368	41.6385
GOTERM_BP_FAT	GO:0051785~positive regulation of nuclear division	5	0.187477	0.0290479	EDN1, NUSAP1, IGF1, IGF2, INSR	1260	9	8785	3.87346	1	0.469368	41.6385
GOTERM_BP_FAT	GO:0051783~regulation of nuclear division	7	0.262467	0.0342057	EDN1, NUSAP1, IGF1, IGF2, INSR, APC, MYCBP2	1260	18	8785	2.71142	1	0.513724	47.0497
GOTERM_BP_FAT	GO:0007088~regulation of mitosis	7	0.262467	0.0342057	EDN1, NUSAP1, IGF1, IGF2, INSR, APC, MYCBP2	1260	18	8785	2.71142	1	0.513724	47.0497
GOTERM_BP_FAT	GO:0010564~regulation of cell cycle process	10	0.374953	0.109108	PLK4, ROCK2, EDN1, NUSAP1, IGF1, IGF2, APBB1, INSR, APC, MYCBP2	1260	40	8785	1.74306	1	0.787451	87.8831
GOTERM_BP_FAT	GO:0033043~regulation of organelle organization	16	0.599925	0.119974	ROCK2, SNCA, ELN, EDN1, NUSAP1, IGF1, IGF2, MYCBP2, DSTN, PLK4, CDC42EP2, TSC1, GSN, CAPG, INSR, APC	1260	76	8785	1.46784	1	0.806452	90.3165
GOTERM_BP_FAT	GO:0007346~regulation of mitotic cell cycle	11	0.412448	0.154987	APP, BCL2, EDN1, NUSAP1, IGF1, SMAD2, IGF2, APBB1, INSR, APC, MYCBP2	1260	49	8785	1.56519	1	0.857896	95.3877
GOTERM_BP_FAT	GO:0045787~positive regulation of cell cycle	6	0.224972	0.313024	APP, EDN1, NUSAP1, IGF1, IGF2, INSR	1260	26	8785	1.60897	1	0.96308	99.895
GOTERM_BP_FAT	GO:0051726~regulation of cell cycle	17	0.63742	0.577362	ROCK2, EDN1, IGF1, NUSAP1, IGF2, SMAD2, MYCBP2, APP, PLK4, JUN, BCL2, GADD45G, SMC1A, INSR, APBB1, CABLES1, APC	1260	114	8785	1.03972	1	0.997688	100
Annotation Cluster 45	Enrichment Score: 1.6258897148931797
Category	Term	Count	%	PValue	Genes	List Total	Pop Hits	Pop Total	Fold Enrichment	Bonferroni	Benjamini	FDR
GOTERM_CC_FAT	GO:0008305~integrin complex	10	0.374953	0.000915539	ITGA9, ITGAV, ITGB4, ITGA11, ITGB5, ITGA3, ITGAD, ITGB3, ITGA4, ITGAM	997	20	6966	3.49348	0.324935	0.020469	1.2823
GOTERM_CC_FAT	GO:0043235~receptor complex	18	0.674916	0.00152554	CSF1, ITGB4, ITGA11, ITGB5, ITGA3, TLR4, SMAD2, ITGB3, ITGA4, ITGAM, ITGA9, ITGAV, SDCBP, ITGAD, TRIP6, INSR, ACVR1, CSF1R	997	56	6966	2.24581	0.480535	0.0280747	2.12817
GOTERM_BP_FAT	GO:0007229~integrin-mediated signaling pathway	11	0.412448	0.00290932	CTGF, ITGA5, ITGAV, COL3A1, ITGB4, ITGB5, ITGA3, ITGAD, ITGB3, ITGA4, ITGAM	1260	27	8785	2.84053	0.999953	0.117046	5.1834
KEGG_PATHWAY	bta05412:Arrhythmogenic right ventricular cardiomyopathy (ARVC)	19	0.712411	0.0079555	ITGB4, ITGA11, LMNA, GJA1, LEF1, ITGB5, CACNG4, ITGA3, CDH2, ITGB3, ITGA4, CTNNA1, TCF7L1, JUP, ITGA9, DES, ITGA5, ITGAV, ITGA7	765	65	4940	1.88758	0.758707	0.0759469	9.35324
INTERPRO	IPR013649:Integrin alpha-2	6	0.224972	0.0085271	ITGA9, ITGA5, ITGAV, ITGAD, ITGA4, ITGAM	1514	9	9171	4.03831	1	0.451226	13.6626
SP_PIR_KEYWORDS	integrin	8	0.299963	0.0266774	ITGA5, ITGAV, ITGB5, ITGA3, ITGAD, ITGB3, ITGA4, ITGAM	1215	19	7349	2.54676	0.999999	0.324086	32.3041
INTERPRO	IPR018184:Integrin alpha chain, C-terminal cytoplasmic region, conserved site	5	0.187477	0.0295501	ITGA5, ITGAV, ITGAD, ITGA4, ITGAM	1514	8	9171	3.78591	1	0.761979	40.2239
INTERPRO	IPR000413:Integrin alpha chain	5	0.187477	0.0295501	ITGAV, ITGA3, ITGAD, ITGA4, ITGAM	1514	8	9171	3.78591	1	0.761979	40.2239
INTERPRO	IPR013519:Integrin alpha beta-propellor	5	0.187477	0.0463685	ITGAV, ITGA3, ITGAD, ITGA4, ITGAM	1514	9	9171	3.36526	1	0.844799	55.7126
SMART	SM00191:Int_alpha	5	0.187477	0.0733129	ITGAV, ITGA3, ITGAD, ITGA4, ITGAM	832	9	4364	2.914	1	0.762642	64.5431
PIR_SUPERFAMILY	PIRSF005666:integrin alpha, VLA protein type	3	0.112486	0.0787052	ITGA5, ITGAV, ITGA4	671	3	3890	5.79732	1	0.999898	70.7627
INTERPRO	IPR013517:FG-GAP	5	0.187477	0.0925861	ITGAV, ITGA3, ITGAD, ITGA4, ITGAM	1514	11	9171	2.75339	1	0.95606	81.1129
INTERPRO	IPR013513:Integrin alpha chain, C-terminal, cytoplasmic region	4	0.149981	0.0933361	ITGAV, ITGAD, ITGA4, ITGAM	1514	7	9171	3.46141	1	0.954982	81.3789
KEGG_PATHWAY	bta05414:Dilated cardiomyopathy	17	0.63742	0.128507	ITGB4, ITGA11, LMNA, ITGB5, IGF1, CACNG4, ITGA3, ITGB3, ITGA4, TPM2, PRKX, ITGA9, DES, ITGA5, ITGAV, ITGA7, PRKACB	765	77	4940	1.42569	1	0.393263	81.5678
KEGG_PATHWAY	bta05410:Hypertrophic cardiomyopathy (HCM)	15	0.56243	0.21434	ITGB4, LMNA, ITGA11, ITGB5, IGF1, CACNG4, ITGA3, ITGB3, ITGA4, TPM2, ITGA9, DES, ITGA5, ITGAV, ITGA7	765	72	4940	1.34532	1	0.483461	94.8482
Annotation Cluster 46	Enrichment Score: 1.6236906729468978
Category	Term	Count	%	PValue	Genes	List Total	Pop Hits	Pop Total	Fold Enrichment	Bonferroni	Benjamini	FDR
UP_SEQ_FEATURE	domain:Olfactomedin-like	5	0.187477	0.00657788	LPHN2, OLFML3, OLFML2B, MYOC, LPHN1	873	6	5635	5.37896	1	0.696846	10.9178
INTERPRO	IPR003112:Olfactomedin-like	5	0.187477	0.0295501	LPHN2, OLFML3, OLFML2B, MYOC, LPHN1	1514	8	9171	3.78591	1	0.761979	40.2239
INTERPRO	IPR003924:GPCR, family 2, latrophilin	4	0.149981	0.0344821	LPHN2, OLFML2B, MYOC, LPHN1	1514	5	9171	4.84597	1	0.783454	45.2268
SMART	SM00284:OLF	5	0.187477	0.0477528	LPHN2, OLFML3, OLFML2B, MYOC, LPHN1	832	8	4364	3.27825	1	0.646466	48.641
Annotation Cluster 47	Enrichment Score: 1.5826997183806617
Category	Term	Count	%	PValue	Genes	List Total	Pop Hits	Pop Total	Fold Enrichment	Bonferroni	Benjamini	FDR
SP_PIR_KEYWORDS	zymogen	29	1.08736	5.48456e-05	CTSL2, LGMN, MMP9, HEXA, F13A1, CTSA, MMP2, GLB1, CFD, MAN2B1, TPSB1, CPA5, PLAT, CTSZ, ADAM10, CFB, MMP14, CTSK, CPE, F5, MMP23B, F2, CTSC, PGCP, CTSB, PROS1, ADAMTS2, PLAU, ADAMTS4	1215	81	7349	2.16553	0.0274244	0.00252476	0.0791053
GOTERM_BP_FAT	GO:0006508~proteolysis	110	4.12448	0.00869679	SCPEP1, MASP1, LGMN, MMP9, IDE, MMP7, MMP3, MMP2, ISG15, HTRA1, KLHL9, CFH, ERAP2, CFD, TPSB1, C4A, SOCS2, USP1, ESPL1, SOCS5, C1QA, C1QB, CPE, BACE2, F2, ADAMTS1, PGCP, TGFB1I1, ADAMTS2, ADAMTS4, CTSL2, KEL, CTSA, ARIH1, FBXO9, PLAT, CPA5, SEC11C, CFB, MALT1, BRCA1, RNF8, P2RX7, UBA2, PLAU, NPEPL1, METAP1, AEBP1, METAP2, RNPEPL1, ANPEP, HP, SENP7, OS9, SENP6, LNPEP, USP18, CASP9, MAP1LC3A, CASP7…	1260	615	8785	1.24706	1	0.253756	14.749
GOTERM_MF_FAT	GO:0008237~metallopeptidase activity	28	1.04987	0.0663364	AEBP1, METAP1, METAP2, MMP9, KEL, RNPEPL1, IDE, MMP7, ANPEP, MMP3, MMP2, LNPEP, ERAP2, DPEP2, CPA5, PEPD, ADAM10, MMP19, PM20D1, MMP14, CPE, MMP23B, CPXM1, ADAMTS1, PGCP, ADAMTS2, ADAMTS4, ADAM15	1384	135	9249	1.38606	1	0.692086	66.4807
SP_PIR_KEYWORDS	Protease	45	1.68729	0.0668426	CTSL2, METAP1, METAP2, USP9Y, MMP9, LGMN, IDE, MMP7, ANPEP, CTSA, C1S, MMP3, MMP2, USP18, ERAP2, C2, YOD1, CFD, TPSB1, USP15, CPA5, PLAT, KLK7, CTSZ, ADAM10, CFB, USP1, MMP19, PM20D1, ELANE, CAPN2, MMP14, CTSK, CPE, MMP23B, F2, ADAMTS1, CTSC, CTSB, PGCP, PRSS23, ADAMTS2, PLAU, ADAMTS4, CTSF	1215	214	7349	1.27189	1	0.497291	63.1453
GOTERM_MF_FAT	GO:0070011~peptidase activity, acting on L-amino acid peptides	73	2.73716	0.0766079	SCPEP1, NPEPL1, METAP1, AEBP1, HM13, METAP2, MASP1, MMP9, LGMN, IDE, RNPEPL1, MMP7, HP, ANPEP, MMP3, MMP2, SENP7, SENP6, LNPEP, USP18, CASP9, HTRA1, CASP7, KLK12, ERAP2, DPP8, YOD1, CFD, TPSB1, USP15, DPEP2, CTSZ, PEPD, ADAM10, USP1, ELANE, MMP19, MMP14, CTSW, GZMM, CTSK, CPE, BACE2, CPXM1, F2, CTSC, ADAMTS1, CTSB, PGCP, ADAMTS2, CTSF, ADAM15, ADAMTS4, CTSL2, USP9Y, KEL, CTSA, C1S, PREPL, C2, PCS…	1384	410	9249	1.18987	1	0.717959	71.8947
GOTERM_MF_FAT	GO:0008233~peptidase activity	75	2.81215	0.0816819	SCPEP1, NPEPL1, METAP1, AEBP1, HM13, METAP2, MASP1, LGMN, MMP9, IDE, RNPEPL1, MMP7, HP, ANPEP, MMP3, MMP2, SENP7, SENP6, LNPEP, USP18, CASP9, HTRA1, CASP7, KLK12, ERAP2, DPP8, YOD1, CFD, TPSB1, USP15, DPEP2, CTSZ, PEPD, ADAM10, USP1, ELANE, MMP19, ESPL1, MMP14, CTSW, GZMM, CTSK, CPE, BACE2, CPXM1, F2, CTSC, ADAMTS1, CTSB, PGCP, ADAMTS2, CTSF, ADAM15, ADAMTS4, CTSL2, USP9Y, KEL, CTSA, C1S, PREPL, …	1384	424	9249	1.1821	1	0.721119	74.2557
GOTERM_MF_FAT	GO:0004175~endopeptidase activity	46	1.72478	0.630082	CTSL2, HM13, MASP1, KEL, MMP9, LGMN, IDE, MMP7, HP, C1S, MMP3, MMP2, CASP9, HTRA1, CASP7, KLK12, PREPL, C2, CFD, PCSK6, TPSB1, PLAT, KLK7, CTSZ, CAPN5, ADAM10, CFB, MMP19, ELANE, MALT1, CAPN2, MMP14, GZMM, CTSK, MMP23B, BACE2, F2, ADAMTS1, CTSC, CTSB, PRSS23, ADAMTS2, PLAU, ADAM15, ADAMTS4, CTSF	1384	312	9249	0.985285	1	0.997014	100
Annotation Cluster 48	Enrichment Score: 1.5469254970958721
Category	Term	Count	%	PValue	Genes	List Total	Pop Hits	Pop Total	Fold Enrichment	Bonferroni	Benjamini	FDR
GOTERM_BP_FAT	GO:0007389~pattern specification process	23	0.862392	0.0155102	FKBP8, TGFBR1, EDN1, PAX6, ABI1, CXCL12, HOXB3, MEOX2, SFRP1, MEOX1, CXCR4, SFRP2, HOXA5, RNF2, GATA4, NR2F2, POFUT1, LFNG, RNF111, LRP5, CYR61, APC, ACVR1	1260	96	8785	1.67043	1	0.345603	24.841
GOTERM_BP_FAT	GO:0009952~anterior/posterior pattern formation	15	0.56243	0.0174795	TGFBR1, PAX6, ABI1, HOXB3, SFRP1, MEOX2, MEOX1, SFRP2, HOXA5, RNF2, GATA4, NR2F2, POFUT1, LRP5, APC	1260	54	8785	1.93673	1	0.373267	27.5406
GOTERM_BP_FAT	GO:0001756~somitogenesis	6	0.224972	0.0284634	MEOX2, SFRP1, SFRP2, MEOX1, ABI1, POFUT1	1260	13	8785	3.21795	1	0.464567	40.9934
GOTERM_BP_FAT	GO:0003002~regionalization	17	0.63742	0.0458775	FKBP8, TGFBR1, EDN1, PAX6, ABI1, HOXB3, MEOX2, SFRP1, MEOX1, SFRP2, HOXA5, RNF2, GATA4, NR2F2, POFUT1, LRP5, APC	1260	72	8785	1.64622	1	0.582049	57.5964
GOTERM_BP_FAT	GO:0035282~segmentation	6	0.224972	0.0520404	MEOX2, SFRP1, SFRP2, MEOX1, ABI1, POFUT1	1260	15	8785	2.78889	1	0.608107	62.3304
Annotation Cluster 49	Enrichment Score: 1.5350300517017423
Category	Term	Count	%	PValue	Genes	List Total	Pop Hits	Pop Total	Fold Enrichment	Bonferroni	Benjamini	FDR
PIR_SUPERFAMILY	PIRSF000303:glutathione peroxidase	5	0.187477	0.00376879	GPX1, GPX4, GPX3, GPX8, GPX7	671	5	3890	5.79732	0.921227	0.921227	5.50688
INTERPRO	IPR000889:Glutathione peroxidase	5	0.187477	0.00835797	GPX1, GPX4, GPX3, GPX8, GPX7	1514	6	9171	5.04789	1	0.456594	13.4096
PIR_SUPERFAMILY	PIRSF000303:Glutathion_perox	5	0.187477	0.00976612	GPX1, GPX4, GPX3, GPX8, GPX7	671	6	3890	4.8311	0.998646	0.963207	13.6899
GOTERM_BP_FAT	GO:0006979~response to oxidative stress	17	0.63742	0.012058	GCLC, EPAS1, PTGS1, SNCA, OXSR1, FOS, GPX1, MTF1, APOE, BCL2, GPX4, NDUFS8, GPX3, MPO, GPX8, DNTTIP2, GPX7	1260	62	8785	1.91174	1	0.304918	19.8778
GOTERM_MF_FAT	GO:0004602~glutathione peroxidase activity	5	0.187477	0.0335046	GPX1, GPX4, GPX3, GPX8, GPX7	1384	9	9249	3.71267	1	0.530183	41.8818
SP_PIR_KEYWORDS	peroxidase	7	0.262467	0.0361709	GPX1, GPX4, PTGS1, GPX3, PRDX4, GPX8, GPX7	1215	16	7349	2.64624	1	0.373097	41.2317
SP_PIR_KEYWORDS	selenium	7	0.262467	0.0483174	SEPX1, GPX1, GPX4, GPX3, SELENBP1, EPT1, SEPP1	1215	17	7349	2.49058	1	0.434841	51.059
GOTERM_MF_FAT	GO:0004601~peroxidase activity	8	0.299963	0.0561371	GPX1, GPX4, PTGS1, GPX3, PRDX4, MPO, GPX8, GPX7	1384	24	9249	2.2276	1	0.666367	60.1495
GOTERM_MF_FAT	GO:0016684~oxidoreductase activity, acting on peroxide as acceptor	8	0.299963	0.0561371	GPX1, GPX4, PTGS1, GPX3, PRDX4, MPO, GPX8, GPX7	1384	24	9249	2.2276	1	0.666367	60.1495
GOTERM_MF_FAT	GO:0016209~antioxidant activity	10	0.374953	0.0784417	GPX1, NXN, APOE, GPX4, PTGS1, GPX3, PRDX4, MPO, GPX8, GPX7	1384	36	9249	1.85633	1	0.721461	72.7705
GOTERM_MF_FAT	GO:0008430~selenium binding	7	0.262467	0.0814896	SEPX1, GPX1, GPX4, GPX3, SELENBP1, EPT1, SEPP1	1384	21	9249	2.2276	1	0.725288	74.1698
SP_PIR_KEYWORDS	selenocysteine	6	0.224972	0.0868205	SEPX1, GPX1, GPX4, GPX3, EPT1, SEPP1	1215	15	7349	2.41942	1	0.554182	73.03
Annotation Cluster 50	Enrichment Score: 1.5241115499678135
Category	Term	Count	%	PValue	Genes	List Total	Pop Hits	Pop Total	Fold Enrichment	Bonferroni	Benjamini	FDR
SP_PIR_KEYWORDS	phospholipid binding	6	0.224972	0.0148286	F5, ANXA1, ANXA5, ANXA4, ANXA2, PRKCB	1215	10	7349	3.62914	0.999487	0.237013	19.3908
UP_SEQ_FEATURE	repeat:Annexin 4	6	0.224972	0.0179761	ANXA6, ANXA1, ANXA5, ANXA4, ANXA3, ANXA2	873	11	5635	3.52077	1	0.856075	27.2226
UP_SEQ_FEATURE	repeat:Annexin 1	6	0.224972	0.0179761	ANXA6, ANXA1, ANXA5, ANXA4, ANXA3, ANXA2	873	11	5635	3.52077	1	0.856075	27.2226
UP_SEQ_FEATURE	repeat:Annexin 2	6	0.224972	0.0179761	ANXA6, ANXA1, ANXA5, ANXA4, ANXA3, ANXA2	873	11	5635	3.52077	1	0.856075	27.2226
UP_SEQ_FEATURE	repeat:Annexin 3	6	0.224972	0.0179761	ANXA6, ANXA1, ANXA5, ANXA4, ANXA3, ANXA2	873	11	5635	3.52077	1	0.856075	27.2226
PIR_SUPERFAMILY	PIRSF002359:annexin I	5	0.187477	0.019704	ANXA1, ANXA5, ANXA4, ANXA3, ANXA2	671	7	3890	4.14094	0.999998	0.964856	25.8096
INTERPRO	IPR018252:Annexin repeat, conserved site	6	0.224972	0.0234373	ANXA6, ANXA1, ANXA5, ANXA4, ANXA3, ANXA2	1514	11	9171	3.30407	1	0.706099	33.4254
INTERPRO	IPR001464:Annexin	6	0.224972	0.0234373	ANXA6, ANXA1, ANXA5, ANXA4, ANXA3, ANXA2	1514	11	9171	3.30407	1	0.706099	33.4254
INTERPRO	IPR018502:Annexin repeat	6	0.224972	0.0234373	ANXA6, ANXA1, ANXA5, ANXA4, ANXA3, ANXA2	1514	11	9171	3.30407	1	0.706099	33.4254
GOTERM_MF_FAT	GO:0005544~calcium-dependent phospholipid binding	6	0.224972	0.0235398	ANXA6, ANXA1, ANXA5, ANXA4, ANXA3, ANXA2	1384	12	9249	3.3414	1	0.453091	31.5691
SP_PIR_KEYWORDS	calcium/phospholipid-binding	6	0.224972	0.0235442	ANXA6, ANXA1, ANXA5, ANXA4, ANXA3, ANXA2	1215	11	7349	3.29921	0.999994	0.31442	29.0909
SP_PIR_KEYWORDS	annexin	6	0.224972	0.0235442	ANXA6, ANXA1, ANXA5, ANXA4, ANXA3, ANXA2	1215	11	7349	3.29921	0.999994	0.31442	29.0909
SP_PIR_KEYWORDS	endonexin fold	4	0.149981	0.0345948	ANXA1, ANXA5, ANXA4, ANXA2	1215	5	7349	4.83885	1	0.36726	39.8297
SMART	SM00335:ANX	6	0.224972	0.0414723	ANXA6, ANXA1, ANXA5, ANXA4, ANXA3, ANXA2	832	11	4364	2.86101	0.999999	0.617141	43.8312
GOTERM_MF_FAT	GO:0004859~phospholipase inhibitor activity	3	0.112486	0.163884	ANXA1, ANXA3, ANXA2	1384	5	9249	4.00968	1	0.870979	94.2174
GOTERM_MF_FAT	GO:0055102~lipase inhibitor activity	3	0.112486	0.341335	ANXA1, ANXA3, ANXA2	1384	8	9249	2.50605	1	0.968908	99.8705
Annotation Cluster 51	Enrichment Score: 1.510886323401538
Category	Term	Count	%	PValue	Genes	List Total	Pop Hits	Pop Total	Fold Enrichment	Bonferroni	Benjamini	FDR
KEGG_PATHWAY	bta04370:VEGF signaling pathway	24	0.899888	0.000413221	MAPKAPK3, KRAS, CASP9, PLA2G2D4, PPP3CB, NFAT5, PIK3CA, NFATC4, PLA2G2D1, NFATC2, NFATC3, PIK3R1, PIK3CB, SPHK1, MAPK11, BAD, KDR, PRKCB, SH2D2A, MAPK1, PLCG1, MAPK12, MAPK13, MAPK3, HSPB1	765	73	4940	2.12302	0.0709275	0.00814096	0.50685
KEGG_PATHWAY	bta04660:T cell receptor signaling pathway	25	0.937383	0.0280925	PDCD1, FOS, KRAS, RASGRP1, NFAT5, PPP3CB, PIK3CA, NFATC4, NFATC2, NFATC3, PIK3R1, DLG1, PDK1, ITK, PIK3CB, CBL, MALT1, MAPK11, MAPK1, CBLB, MAPK12, MAPK13, JUN, MAPK3, GRAP2	765	105	4940	1.5375	0.99373	0.197901	29.5542
KEGG_PATHWAY	bta04662:B cell receptor signaling pathway	15	0.56243	0.170081	PIK3CB, MALT1, FOS, MAPK1, KRAS, RASGRP3, JUN, MAPK3, PPP3CB, NFAT5, PIK3CA, NFATC4, NFATC2, NFATC3, PIK3R1	765	69	4940	1.40381	1	0.453021	89.8938
KEGG_PATHWAY	bta04664:Fc epsilon RI signaling pathway	13	0.487439	0.458171	PDK1, FCER1A, PIK3CB, MAPK11, MAPK1, KRAS, PLCG1, MAPK12, MAPK13, PLA2G2D4, MAPK3, PIK3CA, PLA2G2D1, PIK3R1	765	73	4940	1.14997	1	0.731313	99.9465
Annotation Cluster 52	Enrichment Score: 1.4931033138042864
Category	Term	Count	%	PValue	Genes	List Total	Pop Hits	Pop Total	Fold Enrichment	Bonferroni	Benjamini	FDR
INTERPRO	IPR000668:Peptidase C1A, papain C-terminal	7	0.262467	0.00434644	CTSL2, CTSZ, CTSK, CTSC, CTSB, CTSF, CTSW	1514	11	9171	3.85475	0.999806	0.310355	7.20007
INTERPRO	IPR013128:Peptidase C1A, papain	7	0.262467	0.00434644	CTSL2, CTSZ, CTSK, CTSC, CTSB, CTSF, CTSW	1514	11	9171	3.85475	0.999806	0.310355	7.20007
GOTERM_MF_FAT	GO:0008234~cysteine-type peptidase activity	20	0.749906	0.00491253	CTSL2, CTSZ, CAPN5, USP9Y, LGMN, USP1, MALT1, CAPN2, SENP7, SENP6, CTSW, CTSK, USP18, CASP9, CASP7, CTSC, YOD1, CTSB, USP15, CTSF	1384	69	9249	1.93704	0.994699	0.170669	7.54266
SMART	SM00645:Pept_C1	7	0.262467	0.00902534	CTSL2, CTSZ, CTSK, CTSC, CTSB, CTSF, CTSW	832	11	4364	3.33785	0.954158	0.290011	11.6146
GOTERM_MF_FAT	GO:0004197~cysteine-type endopeptidase activity	12	0.449944	0.0344743	CTSL2, CTSZ, CTSK, CAPN5, CASP9, LGMN, CASP7, CTSC, MALT1, CTSB, CAPN2, CTSF	1384	41	9249	1.95594	1	0.526005	42.8035
INTERPRO	IPR000169:Peptidase, cysteine peptidase active site	7	0.262467	0.0480874	CTSL2, CTSZ, CTSK, CTSC, CTSB, CAPN2, CTSF	1514	17	9171	2.49425	1	0.844242	57.0623
INTERPRO	IPR013201:Proteinase inhibitor I29, cathepsin propeptide	4	0.149981	0.0933361	CTSL2, CTSK, CTSF, CTSW	1514	7	9171	3.46141	1	0.954982	81.3789
SP_PIR_KEYWORDS	thiol protease	12	0.449944	0.125904	CTSL2, CTSZ, CTSK, USP9Y, USP1, LGMN, CTSC, CTSB, YOD1, CAPN2, USP15, CTSF	1215	46	7349	1.57789	1	0.649924	85.6522
SP_PIR_KEYWORDS	cysteine proteinase	3	0.112486	0.259645	CTSL2, CTSZ, CTSB	1215	6	7349	3.02428	1	0.823072	98.6932
PIR_SUPERFAMILY	PIRSF001182:papain	3	0.112486	0.276654	CTSL2, CTSK, CTSB	671	6	3890	2.89866	1	1	99.2237
Annotation Cluster 53	Enrichment Score: 1.4678447364947116
Category	Term	Count	%	PValue	Genes	List Total	Pop Hits	Pop Total	Fold Enrichment	Bonferroni	Benjamini	FDR
SP_PIR_KEYWORDS	tyrosine-protein kinase	11	0.412448	0.00824192	ITK, FGFR1, FGR, HCK, TEK, DSTYK, TXK, TNK2, TIE1, FES, CSF1R	1215	27	7349	2.46423	0.984944	0.15451	11.2558
GOTERM_MF_FAT	GO:0004713~protein tyrosine kinase activity	25	0.937383	0.0110592	FGFR1, FGR, PTK7, DSTYK, FES, EPHB1, MUSK, TEK, TIE1, INSR, CSF1R, ITK, HCK, AXL, BMX, KDR, PLK4, PDGFRA, PDGFRB, ROR2, TXK, TNK2, MERTK, ABL2, MAP3K11	1384	100	9249	1.6707	0.999993	0.280127	16.2299
INTERPRO	IPR008266:Tyrosine protein kinase, active site	9	0.337458	0.0421974	ITK, FGFR1, FGR, TEK, TNK2, TIE1, FES, KDR, CSF1R	1514	25	9171	2.18069	1	0.828345	52.2695
INTERPRO	IPR001245:Tyrosine protein kinase	12	0.449944	0.0740537	ITK, FGFR1, FGR, HCK, TEK, TXK, TNK2, TIE1, FES, KDR, MAP3K11, CSF1R	1514	42	9171	1.7307	1	0.922583	73.2829
SMART	SM00219:TyrKc	12	0.449944	0.160766	ITK, FGFR1, FGR, HCK, TEK, TXK, TNK2, TIE1, FES, KDR, MAP3K11, CSF1R	832	42	4364	1.49863	1	0.880951	90.8071
Annotation Cluster 54	Enrichment Score: 1.4630802553520332
Category	Term	Count	%	PValue	Genes	List Total	Pop Hits	Pop Total	Fold Enrichment	Bonferroni	Benjamini	FDR
GOTERM_BP_FAT	GO:0046394~carboxylic acid biosynthetic process	26	0.974878	0.001739	BCAT1, ASS1, PTGS1, EDN1, LTC4S, PTGIS, AKR1A1, ELOVL5, ALDH4A1, QKI, SCD5, ELOVL6, FCER1A, TBXAS1, SCD, FADS6, BRCA1, ADI1, GLUL, DHFR, PTGDS, SDS, MTR, PHGDH, THNSL1, GULO	1260	96	8785	1.88831	0.997392	0.0826063	3.1296
GOTERM_BP_FAT	GO:0016053~organic acid biosynthetic process	26	0.974878	0.001739	BCAT1, ASS1, PTGS1, EDN1, LTC4S, PTGIS, AKR1A1, ELOVL5, ALDH4A1, QKI, SCD5, ELOVL6, FCER1A, TBXAS1, SCD, FADS6, BRCA1, ADI1, GLUL, DHFR, PTGDS, SDS, MTR, PHGDH, THNSL1, GULO	1260	96	8785	1.88831	0.997392	0.0826063	3.1296
GOTERM_BP_FAT	GO:0033559~unsaturated fatty acid metabolic process	12	0.449944	0.00358307	FCER1A, ACOX1, TNFRSF1A, TBXAS1, PTGIS, PTGDS, PTGES, ALOX12E, PTGS1, EDN1, LTC4S, ALOX5	1260	32	8785	2.61458	0.999995	0.137412	6.34704
GOTERM_BP_FAT	GO:0006690~icosanoid metabolic process	12	0.449944	0.00358307	FCER1A, ACOX1, TNFRSF1A, TBXAS1, PTGIS, PTGDS, PTGES, ALOX12E, PTGS1, EDN1, LTC4S, ALOX5	1260	32	8785	2.61458	0.999995	0.137412	6.34704
GOTERM_BP_FAT	GO:0006693~prostaglandin metabolic process	8	0.299963	0.0063704	ACOX1, TNFRSF1A, TBXAS1, PTGIS, PTGDS, PTGES, PTGS1, EDN1	1260	17	8785	3.28105	1	0.205413	11.0191
GOTERM_BP_FAT	GO:0006692~prostanoid metabolic process	8	0.299963	0.0063704	ACOX1, TNFRSF1A, TBXAS1, PTGIS, PTGDS, PTGES, PTGS1, EDN1	1260	17	8785	3.28105	1	0.205413	11.0191
GOTERM_BP_FAT	GO:0006631~fatty acid metabolic process	26	0.974878	0.0178415	ACOX1, ALOX12E, PTGS1, SNCA, EDN1, LTC4S, ACSF2, TNFRSF1A, CRYL1, PTGIS, ELOVL5, PTGES, QKI, PEX13, SCD5, ELOVL6, FCER1A, TNXB, TBXAS1, ACADS, SCD, FADS6, ADIPOQ, BRCA1, PTGDS, ALOX5	1260	114	8785	1.59016	1	0.377075	28.0268
GOTERM_BP_FAT	GO:0006633~fatty acid biosynthetic process	14	0.524934	0.0438258	FCER1A, TBXAS1, SCD, EDN1, PTGS1, LTC4S, FADS6, BRCA1, PTGIS, ELOVL5, PTGDS, QKI, SCD5, ELOVL6	1260	55	8785	1.77475	1	0.570996	55.8993
SP_PIR_KEYWORDS	Fatty acid biosynthesis	9	0.337458	0.0644986	TBXAS1, PTGIS, ELOVL5, PTGDS, SCD, PTGS1, SCD5, FADS6, BRCA1	1215	27	7349	2.01619	1	0.498353	61.7868
GOTERM_BP_FAT	GO:0006636~unsaturated fatty acid biosynthetic process	7	0.262467	0.0688127	FCER1A, TBXAS1, PTGIS, PTGDS, PTGS1, EDN1, LTC4S	1260	21	8785	2.32407	1	0.66967	72.8131
GOTERM_BP_FAT	GO:0046456~icosanoid biosynthetic process	7	0.262467	0.0688127	FCER1A, TBXAS1, PTGIS, PTGDS, PTGS1, EDN1, LTC4S	1260	21	8785	2.32407	1	0.66967	72.8131
KEGG_PATHWAY	bta00590:Arachidonic acid metabolism	14	0.524934	0.0724801	TBXAS1, ALOX12E, PTGS1, LTC4S, CBR3, GPX1, PTGIS, PTGDS, PTGES, PLA2G2D4, GPX4, GPX3, ALOX5, GPX7, PLA2G2D1	765	55	4940	1.64373	0.999998	0.317951	60.3488
GOTERM_BP_FAT	GO:0001516~prostaglandin biosynthetic process	5	0.187477	0.0803256	TBXAS1, PTGIS, PTGDS, PTGS1, EDN1	1260	12	8785	2.90509	1	0.715009	78.34
GOTERM_BP_FAT	GO:0046457~prostanoid biosynthetic process	5	0.187477	0.0803256	TBXAS1, PTGIS, PTGDS, PTGS1, EDN1	1260	12	8785	2.90509	1	0.715009	78.34
SP_PIR_KEYWORDS	prostaglandin biosynthesis	4	0.149981	0.131988	TBXAS1, PTGIS, PTGDS, PTGS1	1215	8	7349	3.02428	1	0.630921	87.0277
SP_PIR_KEYWORDS	lipid synthesis	13	0.487439	0.169868	CYB5R3, TBXAS1, CYP51A1, RUSC1, SCD, PTGS1, LSS, FADS6, BRCA1, PTGIS, ELOVL5, PTGDS, SCD5	1215	54	7349	1.45613	1	0.701836	93.1859
GOTERM_BP_FAT	GO:0008610~lipid biosynthetic process	28	1.04987	0.300085	CYB5R3, CYP51A1, HSD3B7, HMGCR, RUSC1, PTGS1, EDN1, LSS, LTC4S, EPT1, ISYNA1, APOA1, PTGIS, ELOVL5, QKI, PCYT1A, ELOVL6, SCD5, DHCR24, FCER1A, GLT25D1, TBXAS1, SCD, CERCAM, FADS6, BRCA1, P2RX7, PTGDS	1260	169	8785	1.15516	1	0.957896	99.8523
GOTERM_BP_FAT	GO:0043449~cellular alkene metabolic process	4	0.149981	0.366508	FCER1A, ALOX12E, LTC4S, ALOX5	1260	15	8785	1.85926	1	0.976502	99.9761
GOTERM_BP_FAT	GO:0006691~leukotriene metabolic process	4	0.149981	0.366508	FCER1A, ALOX12E, LTC4S, ALOX5	1260	15	8785	1.85926	1	0.976502	99.9761
Annotation Cluster 55	Enrichment Score: 1.4566859193003736
Category	Term	Count	%	PValue	Genes	List Total	Pop Hits	Pop Total	Fold Enrichment	Bonferroni	Benjamini	FDR
INTERPRO	IPR018133:LAMP/LAMP-like membrane glycoprotein	4	0.149981	0.0157161	LAMP1, CD68, LAMP2, LAMP3	1514	4	9171	6.05746	1	0.610081	23.7952
INTERPRO	IPR002000:Lysosome-associated membrane glycoprotein (Lamp)/CD68	4	0.149981	0.0344821	LAMP1, CD68, LAMP2, LAMP3	1514	5	9171	4.84597	1	0.783454	45.2268
PIR_SUPERFAMILY	PIRSF002462:lysosome-associated membrane protein	3	0.112486	0.0787052	LAMP1, CD68, LAMP2	671	3	3890	5.79732	1	0.999898	70.7627
Annotation Cluster 56	Enrichment Score: 1.4329508958595676
Category	Term	Count	%	PValue	Genes	List Total	Pop Hits	Pop Total	Fold Enrichment	Bonferroni	Benjamini	FDR
GOTERM_MF_FAT	GO:0017124~SH3 domain binding	10	0.374953	0.00408824	CYBA, GPX1, SH3BGRL, FAM125A, ADAM10, BAIAP2, QKI, GJA1, MTSS1L, SIRPA	1384	23	9249	2.90557	0.987206	0.154347	6.31547
UP_SEQ_FEATURE	short sequence motif:SH3-binding	5	0.187477	0.100846	SH3BGRL, FAM125A, ADAM10, QKI, SIRPA	873	12	5635	2.68948	1	0.993905	84.4663
SP_PIR_KEYWORDS	sh3-binding	5	0.187477	0.121885	SH3BGRL, FAM125A, ADAM10, QKI, SIRPA	1215	12	7349	2.52023	1	0.648665	84.6706
Annotation Cluster 57	Enrichment Score: 1.4287902535759045
Category	Term	Count	%	PValue	Genes	List Total	Pop Hits	Pop Total	Fold Enrichment	Bonferroni	Benjamini	FDR
GOTERM_CC_FAT	GO:0030426~growth cone	9	0.337458	0.00432886	EXOC8, CXCR4, SNCA, TNK2, BASP1, SNAP25, APC, THY1, MYH10	997	20	6966	3.14413	0.8445	0.0643074	5.92956
GOTERM_CC_FAT	GO:0030427~site of polarized growth	9	0.337458	0.00432886	EXOC8, CXCR4, SNCA, TNK2, BASP1, SNAP25, APC, THY1, MYH10	997	20	6966	3.14413	0.8445	0.0643074	5.92956
GOTERM_CC_FAT	GO:0043005~neuron projection	17	0.63742	0.108384	SNCG, KIF5B, SYT4, EXOC8, SNCA, BASP1, DTNBP1, THY1, CDH13, APP, CXCR4, PVALB, MTPN, TNK2, SNAP25, MYH10, APC	997	81	6966	1.4664	1	0.553714	80.1388
GOTERM_CC_FAT	GO:0030425~dendrite	3	0.112486	0.9487	TNK2, THY1, MYH10	997	31	6966	0.676158	1	0.999597	100
Annotation Cluster 58	Enrichment Score: 1.378158160225587
Category	Term	Count	%	PValue	Genes	List Total	Pop Hits	Pop Total	Fold Enrichment	Bonferroni	Benjamini	FDR
UP_SEQ_FEATURE	topological domain:Cytoplasmic	151	5.66179	9.96639e-05	MPZL1, ADORA3, BTC, TLR3, TLR4, AQP1, AQP3, LPHN2, SLC2A8, GLT8D2, AGTR1, APP, SLC2A4, LTB4R, ERAP2, FAS, PI16, ITFG3, DDOST, SCAMP5, LPHN1, PLD3, F11R, KCND1, PNPLA2, COLEC12, PIK3IP1, SIRPA, TMEM150B, TMEM134, CCR7, THBD, GPBAR1, DARC, VAMP5, EXT1, TPST2, PAM, CAV1, SCN1B, PTH1R, ITGB5, SLC38A11, TMEM229B, DERL3, FXYD6, ATP6V0B, KCNMB1, ALCAM, ATP6V0C, PROCR, ITGAV, ENTPD8, TEK, ENTPD1, LFNG, S…	873	739	5635	1.3189	0.208893	0.0568976	0.174445
UP_SEQ_FEATURE	topological domain:Extracellular	110	4.12448	0.000483208	MPZL1, ADORA3, BTC, TLR4, AQP1, AQP3, SLC2A8, LPHN2, AGTR1, APP, SLC2A4, LTB4R, FAS, PI16, ITFG3, LPHN1, SCAMP5, F11R, COLEC12, PIK3IP1, SIRPA, TMEM150B, TMEM134, CCR7, THBD, GPBAR1, DARC, SCN1B, PTH1R, ITGB5, SLC38A11, TMEM229B, FXYD6, KCNMB1, ALCAM, PROCR, ITGAV, TEK, ENTPD8, ENTPD1, TYROBP, TMEM120A, TGFBR1, SLC6A15, CD63, P2RX4, LYVE1, TMEM8B, THSD1, ITGA5, CXCL16, ECSCR, SCARA5, GPR84, MSR1,…	873	527	5635	1.34729	0.678994	0.203286	0.843101
UP_SEQ_FEATURE	transmembrane region	207	7.76153	0.0991107	ADORA3, BTC, EPT1, AQP1, AQP3, TMEM141, LPHN2, AGTR1, APP, LTB4R, TMUB1, ERAP2, SCD5, FAS, PI16, ITFG3, LPHN1, PLD3, F11R, COLEC12, PIK3IP1, SIRPA, TMEM150B, TMEM134, CCR7, GPBAR1, TMEM184B, PMP22, EXT1, TPST2, SCN1B, CYP51A1, PTH1R, SFXN3, TMEM229B, KCNMB1, ATP6V0B, ALCAM, ATP6V0C, PROCR, LFNG, TYROBP, TMEM120A, LAPTM4B, MGAT4A, SCD, TGFBR1, MAOA, MAOB, RHBDF1, UPK3B, CD63, TMEM115, CLCN7, GPR84…	873	1235	5635	1.08189	1	0.994597	83.9326
SP_PIR_KEYWORDS	transmembrane	286	10.7237	0.144841	ADORA3, B3GALT4, BTC, EPT1, AQP1, AQP3, TMEM141, S1PR2, LPHN2, AGTR1, APP, MALL, LTB4R, TMUB1, ERAP2, SCD5, FAS, PI16, ITFG3, LPHN1, PLD3, F11R, CRTAM, TMEM22, COLEC12, PIK3IP1, SIRPA, TMEM150B, TMEM134, CCR7, GPBAR1, CCR4, TMEM184B, EXT1, PMP22, BOLA-DYB, TPST2, SCN1B, CYP51A1, PTH1R, SFXN3, FCGRT, TMEM229B, SYPL2, KCNMB1, ATP6V0B, ALCAM, ATP6V0C, PROCR, PVRL2, LFNG, TYROBP, TMEM120A, LAPTM4B, M…	1215	1639	7349	1.05545	1	0.657683	89.54
SP_PIR_KEYWORDS	membrane	331	12.4109	0.325994	ADORA3, S100A8, CYP2D14, EFNA1, B3GALT4, PTGS1, S100A9, BTC, SELENBP1, EPT1, AQP1, AQP3, TMEM141, LPHN2, AGTR1, FAM125A, APP, MALL, PLOD1, LTB4R, TMUB1, VNN1, ERAP2, SCD5, FAS, PI16, ITFG3, LPHN1, PLD3, F11R, PLD2, CRTAM, GATM, ROCK2, COLEC12, PIK3IP1, CTNNA1, SIRPA, TMEM150B, JUP, TMEM134, CCR7, NAPEPLD, GPBAR1, CCR4, EFNA5, TMEM184B, RAB13, EXT1, PMP22, TPST2, SCN1B, CYP51A1, PTH1R, SFXN3, TMEM…	1215	1963	7349	1.0199	1	0.880909	99.6628
GOTERM_CC_FAT	GO:0031224~intrinsic to membrane	369	13.8358	1	HM13, ADORA3, EFNA1, B3GALT4, BTC, EPT1, AQP1, AQP3, TMEM141, S1PR2, LPHN2, AGTR1, APP, MALL, LTB4R, C10H14ORF1, TMUB1, VNN1, ERAP2, SCD5, FAS, PI16, ITFG3, LPHN1, PLD3, SLC12A6, F11R, SLC12A7, CRTAM, TMEM22, COLEC12, PIK3IP1, SIRPA, TMEM150B, THY1, TMEM134, ATP2C2, CCR7, GPBAR1, CCR4, PEX26, ROR2, PDGFRB, TMEM184B, EXT1, PMP22, BOLA-DYB, TPST2, SCN1B, CYP51A1, PTH1R, ITGA11, SFXN3, FCGRT, BDKRB1…	997	3101	6966	0.831406	1	1	100
GOTERM_CC_FAT	GO:0016021~integral to membrane	355	13.3108	1	HM13, ADORA3, B3GALT4, BTC, EPT1, AQP1, AQP3, TMEM141, S1PR2, LPHN2, AGTR1, APP, MALL, LTB4R, C10H14ORF1, TMUB1, ERAP2, SCD5, FAS, PI16, ITFG3, LPHN1, PLD3, SLC12A6, F11R, SLC12A7, CRTAM, TMEM22, COLEC12, PIK3IP1, SIRPA, TMEM150B, TMEM134, ATP2C2, CCR7, GPBAR1, CCR4, PEX26, ROR2, PDGFRB, TMEM184B, EXT1, PMP22, BOLA-DYB, TPST2, SCN1B, CYP51A1, PTH1R, ITGA11, SFXN3, FCGRT, BDKRB1, TMEM229B, SYPL2, …	997	3006	6966	0.82514	1	1	100
Annotation Cluster 59	Enrichment Score: 1.3735973217461268
Category	Term	Count	%	PValue	Genes	List Total	Pop Hits	Pop Total	Fold Enrichment	Bonferroni	Benjamini	FDR
GOTERM_BP_FAT	GO:0042981~regulation of apoptosis	58	2.17473	0.00998324	MMP9, BTC, SNCA, FOXO3, KCNIP3, GPX1, G2E3, CASP9, APOE, BOK, PIK3CA, VNN1, NOS3, FAS, TERT, RAB27A, KCNMA1, NOL3, MBD4, FADD, CTNNA1, STK4, CARD10, LYST, NGFR, ACVR1, CCL2, GCLC, STK17B, NR3C1, TNFRSF4, ADA, ALB, BCL2, FCGR1A, PRKRA, TRAF5, PIK3R1, SCG2, ANGPTL4, APC, PLAGL2, B4GALT1, CARD9, TGFBR1, IGF1, NR4A1, SMAD2, BAD, ADIPOQ, CDH13, P2RX4, HSP90B1, P2RX7, NUPR1, APIP, IGFBP3, F2R	1260	295	8785	1.37081	1	0.27641	16.7476
GOTERM_BP_FAT	GO:0043067~regulation of programmed cell death	58	2.17473	0.0122422	MMP9, BTC, SNCA, FOXO3, KCNIP3, GPX1, G2E3, CASP9, APOE, BOK, PIK3CA, VNN1, NOS3, FAS, TERT, RAB27A, KCNMA1, NOL3, MBD4, FADD, CTNNA1, STK4, CARD10, LYST, NGFR, ACVR1, CCL2, GCLC, STK17B, NR3C1, TNFRSF4, ADA, ALB, BCL2, FCGR1A, PRKRA, TRAF5, PIK3R1, SCG2, ANGPTL4, APC, PLAGL2, B4GALT1, CARD9, TGFBR1, IGF1, NR4A1, SMAD2, BAD, ADIPOQ, CDH13, P2RX4, HSP90B1, P2RX7, NUPR1, APIP, IGFBP3, F2R	1260	298	8785	1.35701	1	0.306569	20.1503
GOTERM_BP_FAT	GO:0010941~regulation of cell death	58	2.17473	0.0130834	MMP9, BTC, SNCA, FOXO3, KCNIP3, GPX1, G2E3, CASP9, APOE, BOK, PIK3CA, VNN1, NOS3, FAS, TERT, RAB27A, KCNMA1, NOL3, MBD4, FADD, CTNNA1, STK4, CARD10, LYST, NGFR, ACVR1, CCL2, GCLC, STK17B, NR3C1, TNFRSF4, ADA, ALB, BCL2, FCGR1A, PRKRA, TRAF5, PIK3R1, SCG2, ANGPTL4, APC, PLAGL2, B4GALT1, CARD9, TGFBR1, IGF1, NR4A1, SMAD2, BAD, ADIPOQ, CDH13, P2RX4, HSP90B1, P2RX7, NUPR1, APIP, IGFBP3, F2R	1260	299	8785	1.35247	1	0.312793	21.3835
GOTERM_BP_FAT	GO:0043065~positive regulation of apoptosis	27	1.01237	0.0184754	MMP9, STK17B, FOXO3, NR3C1, GPX1, APOE, BOK, FCGR1A, PRKRA, FAS, RAB27A, APC, PLAGL2, B4GALT1, KCNMA1, TGFBR1, NR4A1, SMAD2, MBD4, BAD, STK4, ADIPOQ, P2RX7, NUPR1, LYST, NGFR, IGFBP3	1260	120	8785	1.56875	1	0.380749	28.8706
GOTERM_BP_FAT	GO:0043068~positive regulation of programmed cell death	27	1.01237	0.0204302	MMP9, STK17B, FOXO3, NR3C1, GPX1, APOE, BOK, FCGR1A, PRKRA, FAS, RAB27A, APC, PLAGL2, B4GALT1, KCNMA1, TGFBR1, NR4A1, SMAD2, MBD4, BAD, STK4, ADIPOQ, P2RX7, NUPR1, LYST, NGFR, IGFBP3	1260	121	8785	1.55579	1	0.395863	31.4145
GOTERM_BP_FAT	GO:0010942~positive regulation of cell death	27	1.01237	0.0225434	MMP9, STK17B, FOXO3, NR3C1, GPX1, APOE, BOK, FCGR1A, PRKRA, FAS, RAB27A, APC, PLAGL2, B4GALT1, KCNMA1, TGFBR1, NR4A1, SMAD2, MBD4, BAD, STK4, ADIPOQ, P2RX7, NUPR1, LYST, NGFR, IGFBP3	1260	122	8785	1.54303	1	0.415784	34.0677
GOTERM_BP_FAT	GO:0006917~induction of apoptosis	18	0.674916	0.0382243	TGFBR1, STK17B, NR4A1, SMAD2, MBD4, BAD, FOXO3, GPX1, NUPR1, APOE, BOK, LYST, FCGR1A, PRKRA, FAS, NGFR, RAB27A, PLAGL2	1260	76	8785	1.65132	1	0.534942	50.9332
GOTERM_BP_FAT	GO:0012502~induction of programmed cell death	18	0.674916	0.0382243	TGFBR1, STK17B, NR4A1, SMAD2, MBD4, BAD, FOXO3, GPX1, NUPR1, APOE, BOK, LYST, FCGR1A, PRKRA, FAS, NGFR, RAB27A, PLAGL2	1260	76	8785	1.65132	1	0.534942	50.9332
GOTERM_BP_FAT	GO:0006916~anti-apoptosis	13	0.487439	0.183539	CCL2, GCLC, TGFBR1, IGF1, GPX1, CDH13, HSP90B1, APOE, BCL2, PIK3CA, VNN1, NOS3, TERT	1260	63	8785	1.43871	1	0.891547	97.5384
GOTERM_BP_FAT	GO:0043066~negative regulation of apoptosis	26	0.974878	0.194948	GCLC, CCL2, SNCA, BTC, ADA, GPX1, G2E3, APOE, ALB, BCL2, VNN1, PIK3CA, NOS3, FAS, TERT, PIK3R1, ANGPTL4, APC, SCG2, TGFBR1, IGF1, CTNNA1, CDH13, HSP90B1, APIP, ACVR1	1260	146	8785	1.24163	1	0.901353	98.0964
GOTERM_BP_FAT	GO:0060548~negative regulation of cell death	26	0.974878	0.214974	GCLC, CCL2, SNCA, BTC, ADA, GPX1, G2E3, APOE, ALB, BCL2, VNN1, PIK3CA, NOS3, FAS, TERT, PIK3R1, ANGPTL4, APC, SCG2, TGFBR1, IGF1, CTNNA1, CDH13, HSP90B1, APIP, ACVR1	1260	148	8785	1.22485	1	0.913498	98.7985
GOTERM_BP_FAT	GO:0043069~negative regulation of programmed cell death	26	0.974878	0.214974	GCLC, CCL2, SNCA, BTC, ADA, GPX1, G2E3, APOE, ALB, BCL2, VNN1, PIK3CA, NOS3, FAS, TERT, PIK3R1, ANGPTL4, APC, SCG2, TGFBR1, IGF1, CTNNA1, CDH13, HSP90B1, APIP, ACVR1	1260	148	8785	1.22485	1	0.913498	98.7985
Annotation Cluster 60	Enrichment Score: 1.3587838869638316
Category	Term	Count	%	PValue	Genes	List Total	Pop Hits	Pop Total	Fold Enrichment	Bonferroni	Benjamini	FDR
GOTERM_BP_FAT	GO:0031274~positive regulation of pseudopodium assembly	4	0.149981	0.0104893	CDC42EP2, CDC42EP1, CDC42EP4, APC	1260	4	8785	6.97222	1	0.283746	17.5216
GOTERM_BP_FAT	GO:0031272~regulation of pseudopodium assembly	4	0.149981	0.0104893	CDC42EP2, CDC42EP1, CDC42EP4, APC	1260	4	8785	6.97222	1	0.283746	17.5216
GOTERM_BP_FAT	GO:0060491~regulation of cell projection assembly	5	0.187477	0.0181694	CDC42EP2, CDC42EP1, TGFBR1, CDC42EP4, APC	1260	8	8785	4.35764	1	0.377993	28.4645
GOTERM_BP_FAT	GO:0031346~positive regulation of cell projection organization	6	0.224972	0.0284634	CDC42EP2, CDC42EP1, TGFBR1, SEMA4D, CDC42EP4, APC	1260	13	8785	3.21795	1	0.464567	40.9934
GOTERM_BP_FAT	GO:0031344~regulation of cell projection organization	8	0.299963	0.0370717	CDC42EP2, CDC42EP1, EFNA1, TGFBR1, SEMA4D, CDC42EP4, APC, THY1	1260	23	8785	2.42512	1	0.532112	49.8478
GOTERM_BP_FAT	GO:0044087~regulation of cellular component biogenesis	11	0.412448	0.154987	HMGB1, CDC42EP2, CDC42EP1, TSC1, GSN, TGFBR1, CAPG, EDN1, ELN, CDC42EP4, APC	1260	49	8785	1.56519	1	0.857896	95.3877
INTERPRO	IPR000095:PAK-box/P21-Rho-binding	4	0.149981	0.174227	CDC42EP2, CDC42EP1, WASL, CDC42EP4	1514	9	9171	2.69221	1	0.990313	96.2523
SMART	SM00285:PBD	4	0.149981	0.236675	CDC42EP2, CDC42EP1, WASL, CDC42EP4	832	9	4364	2.3312	1	0.932843	97.4721
Annotation Cluster 61	Enrichment Score: 1.354882817075326
Category	Term	Count	%	PValue	Genes	List Total	Pop Hits	Pop Total	Fold Enrichment	Bonferroni	Benjamini	FDR
GOTERM_BP_FAT	GO:0031099~regeneration	5	0.187477	0.0181694	GPX1, BCL2, NINJ2, IGF1, GJA1	1260	8	8785	4.35764	1	0.377993	28.4645
GOTERM_BP_FAT	GO:0042246~tissue regeneration	4	0.149981	0.0419191	GPX1, NINJ2, IGF1, GJA1	1260	6	8785	4.64815	1	0.56058	54.2649
GOTERM_BP_FAT	GO:0043403~skeletal muscle regeneration	3	0.112486	0.0556986	GPX1, IGF1, GJA1	1260	3	8785	6.97222	1	0.626317	64.8995
GOTERM_BP_FAT	GO:0048589~developmental growth	9	0.337458	0.0897162	GPX1, APP, NDN, NCAPG2, BCL2, NINJ2, IGF1, GJA1, FOXO3	1260	33	8785	1.90152	1	0.740747	82.0431
Annotation Cluster 62	Enrichment Score: 1.3494295407815258
Category	Term	Count	%	PValue	Genes	List Total	Pop Hits	Pop Total	Fold Enrichment	Bonferroni	Benjamini	FDR
GOTERM_BP_FAT	GO:0010038~response to metal ion	8	0.299963	0.0227131	GSS, KCNMA1, GPX1, P2RX7, S100A16, MTF1, FGB, ITPR3	1260	21	8785	2.65608	1	0.413866	34.2765
GOTERM_BP_FAT	GO:0010035~response to inorganic substance	12	0.449944	0.0490435	GSS, KCNMA1, FOS, GPX1, P2RX7, S100A16, GCLC, MTF1, FGB, BCL2, GPX3, ITPR3	1260	45	8785	1.85926	1	0.597243	60.0945
GOTERM_BP_FAT	GO:0051592~response to calcium ion	5	0.187477	0.0803256	KCNMA1, P2RX7, S100A16, FGB, ITPR3	1260	12	8785	2.90509	1	0.715009	78.34
Annotation Cluster 63	Enrichment Score: 1.3390721569971669
Category	Term	Count	%	PValue	Genes	List Total	Pop Hits	Pop Total	Fold Enrichment	Bonferroni	Benjamini	FDR
INTERPRO	IPR000867:Insulin-like growth factor-binding protein, IGFBP	8	0.299963	0.00223778	NOV, CTGF, IGFBP7, IGFBP6, IGFBP3, IGFBP4, IGFBP5, CYR61	1514	13	9171	3.72767	0.987667	0.216662	3.77023
SMART	SM00121:IB	8	0.299963	0.00520272	NOV, CTGF, IGFBP7, IGFBP6, IGFBP3, IGFBP4, IGFBP5, CYR61	832	13	4364	3.22781	0.830269	0.198838	6.85704
GOTERM_MF_FAT	GO:0005520~insulin-like growth factor binding	9	0.337458	0.0057527	NOV, CTGF, IGFBP7, IGFBP6, IGFBP3, INSR, IGFBP4, IGFBP5, CYR61	1384	20	9249	3.00726	0.997842	0.179645	8.778
INTERPRO	IPR001007:von Willebrand factor, type C	8	0.299963	0.019466	NOV, VWF, BMPER, CTGF, COL3A1, FSTL1, COL1A1, CYR61	1514	18	9171	2.69221	1	0.657457	28.6252
SMART	SM00214:VWC	8	0.299963	0.0401057	NOV, VWF, BMPER, CTGF, COL3A1, FSTL1, COL1A1, CYR61	832	18	4364	2.3312	0.999999	0.629931	42.7308
INTERPRO	IPR012395:IGFBP-related, CNN	3	0.112486	0.0726412	NOV, CTGF, CYR61	1514	3	9171	6.05746	1	0.922004	72.575
PIR_SUPERFAMILY	PIRSF036495:IGFBP_rP_CNN	3	0.112486	0.0787052	NOV, CTGF, CYR61	671	3	3890	5.79732	1	0.999898	70.7627
INTERPRO	IPR006207:Cystine knot, C-terminal	4	0.149981	0.219993	NOV, VWF, CTGF, CYR61	1514	10	9171	2.42299	1	0.996071	98.5908
SMART	SM00041:CT	4	0.149981	0.293377	NOV, VWF, CTGF, CYR61	832	10	4364	2.09808	1	0.962359	99.1164
UP_SEQ_FEATURE	domain:VWFC	3	0.112486	0.29669	CTGF, FSTL1, COL1A1	873	7	5635	2.76632	1	0.999981	99.7899
INTERPRO	IPR006208:Cystine knot	3	0.112486	0.325448	NOV, CTGF, CYR61	1514	7	9171	2.59606	1	0.999362	99.8834
Annotation Cluster 64	Enrichment Score: 1.319550121457555
Category	Term	Count	%	PValue	Genes	List Total	Pop Hits	Pop Total	Fold Enrichment	Bonferroni	Benjamini	FDR
GOTERM_BP_FAT	GO:0007202~activation of phospholipase C activity	6	0.224972	0.0130716	AGTR1, GNA15, NMUR2, EDN1, PTH1R, SELE	1260	11	8785	3.80303	1	0.31472	21.3664
GOTERM_BP_FAT	GO:0010863~positive regulation of phospholipase C activity	6	0.224972	0.0130716	AGTR1, GNA15, NMUR2, EDN1, PTH1R, SELE	1260	11	8785	3.80303	1	0.31472	21.3664
GOTERM_BP_FAT	GO:0006874~cellular calcium ion homeostasis	16	0.599925	0.0197033	GNA15, CAV1, PIK3CB, PTH1R, EDN1, SYPL2, PRKCB, AGTR1, P2RX7, ATP2A2, APOE, BCL2, NMUR2, F2, RGN, F2R	1260	60	8785	1.85926	1	0.389139	30.4789
GOTERM_BP_FAT	GO:0010518~positive regulation of phospholipase activity	6	0.224972	0.0198059	AGTR1, GNA15, NMUR2, EDN1, PTH1R, SELE	1260	12	8785	3.48611	1	0.388544	30.6116
GOTERM_BP_FAT	GO:0007200~activation of phospholipase C activity by G-protein coupled receptor protein signaling pathway coupled to IP3 second messenger	5	0.187477	0.0290479	AGTR1, GNA15, NMUR2, EDN1, PTH1R	1260	9	8785	3.87346	1	0.469368	41.6385
GOTERM_BP_FAT	GO:0048015~phosphoinositide-mediated signaling	8	0.299963	0.029304	AGTR1, GNA15, PIK3CB, NMUR2, EDN1, PTH1R, PIK3CA, IGF1	1260	22	8785	2.53535	1	0.470256	41.9191
GOTERM_BP_FAT	GO:0051345~positive regulation of hydrolase activity	13	0.487439	0.0299025	GNA15, PTH1R, ALDOB, EDN1, SMAD2, THY1, AGTR1, APOA1, TSC1, NMUR2, RGN, SELE, F2R	1260	47	8785	1.92849	1	0.47508	42.5699
GOTERM_BP_FAT	GO:0010517~regulation of phospholipase activity	6	0.224972	0.039181	AGTR1, GNA15, NMUR2, EDN1, PTH1R, SELE	1260	14	8785	2.9881	1	0.537836	51.8172
GOTERM_BP_FAT	GO:0060193~positive regulation of lipase activity	6	0.224972	0.0520404	AGTR1, GNA15, NMUR2, EDN1, PTH1R, SELE	1260	15	8785	2.78889	1	0.608107	62.3304
GOTERM_BP_FAT	GO:0060191~regulation of lipase activity	7	0.262467	0.0836284	AGTR1, GNA15, NMUR2, EDN1, PTH1R, SELE, ANGPTL4	1260	22	8785	2.21843	1	0.723809	79.7179
GOTERM_BP_FAT	GO:0019932~second-messenger-mediated signaling	11	0.412448	0.12635	AGTR1, GNA15, APOE, PIK3CB, NMUR2, EDN1, PTH1R, PIK3CA, IGF1, CALCRL, RCAN3	1260	47	8785	1.6318	1	0.817982	91.5212
GOTERM_BP_FAT	GO:0019722~calcium-mediated signaling	4	0.149981	0.162642	AGTR1, NMUR2, EDN1, RCAN3	1260	10	8785	2.78889	1	0.867657	96.0941
GOTERM_BP_FAT	GO:0051480~cytosolic calcium ion homeostasis	8	0.299963	0.164631	AGTR1, P2RX7, GNA15, CAV1, NMUR2, F2, EDN1, F2R	1260	32	8785	1.74306	1	0.869435	96.2602
GOTERM_BP_FAT	GO:0007204~elevation of cytosolic calcium ion concentration	6	0.224972	0.343135	AGTR1, P2RX7, GNA15, NMUR2, EDN1, F2R	1260	27	8785	1.54938	1	0.971187	99.9537
Annotation Cluster 65	Enrichment Score: 1.3125178141634968
Category	Term	Count	%	PValue	Genes	List Total	Pop Hits	Pop Total	Fold Enrichment	Bonferroni	Benjamini	FDR
GOTERM_CC_FAT	GO:0070161~anchoring junction	18	0.674916	0.00594574	B4GALT1, PARD3, LIMS2, FBLIM1, GJA1, MPP7, CDH2, CTNNA1, PNN, JUP, SORBS3, SDC1, TJP1, ITGA5, PVRL2, TGFB1I1, DLG5, TRIP6	997	63	6966	1.99627	0.922566	0.0792134	8.05926
GOTERM_CC_FAT	GO:0005912~adherens junction	16	0.599925	0.0085426	PARD3, LIMS2, FBLIM1, GJA1, MPP7, CDH2, CTNNA1, JUP, SORBS3, SDC1, TJP1, ITGA5, PVRL2, TGFB1I1, DLG5, TRIP6	997	55	6966	2.03257	0.97479	0.105536	11.3862
GOTERM_CC_FAT	GO:0016323~basolateral plasma membrane	17	0.63742	0.0242567	B4GALT1, TF, LIMS2, SLC12A2, ANXA1, FBLIM1, ITGA3, AQP1, AQP3, SORBS3, SDC1, TJP1, PGM5, ITGA5, SLC4A2, TGFB1I1, TRIP6	997	67	6966	1.77281	0.999973	0.236707	29.2482
GOTERM_CC_FAT	GO:0005913~cell-cell adherens junction	7	0.262467	0.0338181	JUP, TJP1, PARD3, PVRL2, GJA1, DLG5, CTNNA1	997	18	6966	2.71715	1	0.28497	38.4144
GOTERM_CC_FAT	GO:0030055~cell-substrate junction	8	0.299963	0.204167	SORBS3, SDC1, LIMS2, PGM5, ITGA5, FBLIM1, TGFB1I1, TRIP6	997	34	6966	1.64399	1	0.729166	95.9952
GOTERM_CC_FAT	GO:0005925~focal adhesion	7	0.262467	0.251436	SORBS3, SDC1, LIMS2, ITGA5, FBLIM1, TGFB1I1, TRIP6	997	30	6966	1.63029	1	0.776164	98.3101
GOTERM_CC_FAT	GO:0005924~cell-substrate adherens junction	7	0.262467	0.303519	SORBS3, SDC1, LIMS2, ITGA5, FBLIM1, TGFB1I1, TRIP6	997	32	6966	1.5284	1	0.818268	99.3882
Annotation Cluster 66	Enrichment Score: 1.3084189383720155
Category	Term	Count	%	PValue	Genes	List Total	Pop Hits	Pop Total	Fold Enrichment	Bonferroni	Benjamini	FDR
SP_PIR_KEYWORDS	metalloprotease	17	0.63742	0.00197053	CPA5, ADAM10, MMP9, MMP19, IDE, MMP7, ANPEP, MMP3, MMP14, MMP2, CPE, MMP23B, ERAP2, ADAMTS1, PGCP, ADAMTS2, ADAMTS4	1215	46	7349	2.23534	0.632136	0.0571292	2.80587
INTERPRO	IPR001818:Peptidase M10A and M12B, matrixin and adamalysin	8	0.299963	0.00223778	ADAM10, MMP23B, MMP9, MMP19, MMP7, MMP14, MMP3, MMP2	1514	13	9171	3.72767	0.987667	0.216662	3.77023
INTERPRO	IPR006026:Peptidase, metallopeptidases	7	0.262467	0.00434644	MMP23B, MMP9, MMP19, MMP7, MMP14, MMP3, MMP2	1514	11	9171	3.85475	0.999806	0.310355	7.20007
SMART	SM00235:ZnMc	7	0.262467	0.00902534	MMP23B, MMP9, MMP19, MMP7, MMP14, MMP3, MMP2	832	11	4364	3.33785	0.954158	0.290011	11.6146
INTERPRO	IPR002477:Peptidoglycan binding-like	6	0.224972	0.0234373	MMP9, MMP19, MMP7, MMP14, MMP3, MMP2	1514	11	9171	3.30407	1	0.706099	33.4254
UP_SEQ_FEATURE	short sequence motif:Cysteine switch	5	0.187477	0.0236899	ADAM10, MMP9, MMP14, MMP2, ADAMTS4	873	8	5635	4.03422	1	0.904493	34.2946
INTERPRO	IPR006025:Peptidase M, neutral zinc metallopeptidases, zinc-binding site	9	0.337458	0.0258828	ADAM10, MMP23B, MMP9, ERAP2, ANPEP, MMP14, MMP2, ADAMTS2, ADAMTS4	1514	23	9171	2.37031	1	0.732665	36.2282
INTERPRO	IPR018487:Hemopexin/matrixin, repeat	6	0.224972	0.0491026	MMP9, MMP19, VTN, MMP14, MMP3, MMP2	1514	13	9171	2.79575	1	0.844928	57.841
INTERPRO	IPR000585:Hemopexin/matrixin	6	0.224972	0.0491026	MMP9, MMP19, VTN, MMP14, MMP3, MMP2	1514	13	9171	2.79575	1	0.844928	57.841
UP_SEQ_FEATURE	metal ion-binding site:Zinc; catalytic	10	0.374953	0.0579929	CPA5, ALAD, ADAM10, MMP23B, ERAP2, AICDA, ANPEP, MMP14, ADAMTS2, ADAMTS4	873	33	5635	1.95599	1	0.979789	64.8854
SMART	SM00120:HX	6	0.224972	0.0830726	MMP9, MMP19, VTN, MMP14, MMP3, MMP2	832	13	4364	2.42086	1	0.771074	69.3039
UP_SEQ_FEATURE	metal ion-binding site:Zinc; in inhibited form	3	0.112486	0.115692	ADAM10, MMP14, ADAMTS4	873	4	5635	4.84107	1	0.99572	88.3958
INTERPRO	IPR018486:Hemopexin/matrixin, conserved site	4	0.149981	0.219993	MMP9, VTN, MMP14, MMP2	1514	10	9171	2.42299	1	0.996071	98.5908
UP_SEQ_FEATURE	domain:Hemopexin-like 2	3	0.112486	0.29669	MMP9, MMP14, MMP2	873	7	5635	2.76632	1	0.999981	99.7899
UP_SEQ_FEATURE	domain:Hemopexin-like 1	3	0.112486	0.29669	MMP9, MMP14, MMP2	873	7	5635	2.76632	1	0.999981	99.7899
UP_SEQ_FEATURE	domain:Hemopexin-like 4	3	0.112486	0.29669	MMP9, MMP14, MMP2	873	7	5635	2.76632	1	0.999981	99.7899
UP_SEQ_FEATURE	domain:Hemopexin-like 3	3	0.112486	0.29669	MMP9, MMP14, MMP2	873	7	5635	2.76632	1	0.999981	99.7899
GOTERM_MF_FAT	GO:0004222~metalloendopeptidase activity	14	0.524934	0.49319	ADAM10, KEL, MMP9, IDE, MMP19, MMP7, MMP3, MMP14, MMP2, MMP23B, ADAMTS1, ADAMTS2, ADAMTS4, ADAM15	1384	84	9249	1.1138	1	0.988795	99.998
Annotation Cluster 67	Enrichment Score: 1.297641340650895
Category	Term	Count	%	PValue	Genes	List Total	Pop Hits	Pop Total	Fold Enrichment	Bonferroni	Benjamini	FDR
GOTERM_BP_FAT	GO:0001894~tissue homeostasis	10	0.374953	0.0209847	RBP4, P2RX7, EPAS1, BCL2, CSF1, PTH1R, PDGFRB, COL11A2, KDR, F2R	1260	30	8785	2.32407	1	0.401965	32.1204
GOTERM_BP_FAT	GO:0060249~anatomical structure homeostasis	14	0.524934	0.024707	RBP4, EPAS1, CSF1, PTH1R, KDR, P2RX7, BCL2, GAA, PDGFRB, COL11A2, PARP1, TERT, APC, F2R	1260	51	8785	1.91394	1	0.43237	36.6834
GOTERM_BP_FAT	GO:0048871~multicellular organismal homeostasis	11	0.412448	0.0515357	RBP4, GPX1, P2RX7, EPAS1, BCL2, CSF1, PTH1R, PDGFRB, COL11A2, KDR, F2R	1260	40	8785	1.91736	1	0.60632	61.9624
GOTERM_BP_FAT	GO:0048873~homeostasis of number of cells within a tissue	4	0.149981	0.241326	P2RX7, BCL2, CSF1, F2R	1260	12	8785	2.32407	1	0.93312	99.3561
Annotation Cluster 68	Enrichment Score: 1.27367431212718
Category	Term	Count	%	PValue	Genes	List Total	Pop Hits	Pop Total	Fold Enrichment	Bonferroni	Benjamini	FDR
GOTERM_MF_FAT	GO:0008034~lipoprotein binding	8	0.299963	0.00544532	CDH13, MSR1, APOA1, OLR1, APOE, CXCL16, COLEC12, STAB2	1384	16	9249	3.3414	0.997002	0.176058	8.32785
GOTERM_MF_FAT	GO:0030169~low-density lipoprotein binding	6	0.224972	0.0235398	CDH13, MSR1, OLR1, CXCL16, COLEC12, STAB2	1384	12	9249	3.3414	1	0.453091	31.5691
GOTERM_MF_FAT	GO:0005041~low-density lipoprotein receptor activity	3	0.112486	0.222379	OLR1, CXCL16, STAB2	1384	6	9249	3.3414	1	0.921817	98.1781
GOTERM_MF_FAT	GO:0030228~lipoprotein receptor activity	3	0.112486	0.282086	OLR1, CXCL16, STAB2	1384	7	9249	2.86406	1	0.949625	99.4895
Annotation Cluster 69	Enrichment Score: 1.2689819018599149
Category	Term	Count	%	PValue	Genes	List Total	Pop Hits	Pop Total	Fold Enrichment	Bonferroni	Benjamini	FDR
GOTERM_BP_FAT	GO:0043588~skin development	7	0.262467	0.00917172	COL3A1, COL1A2, NGFR, COL1A1, ADAMTS2, APC, DHCR24	1260	14	8785	3.48611	1	0.26127	15.492
GOTERM_BP_FAT	GO:0048730~epidermis morphogenesis	5	0.187477	0.0290479	BCL2, COL1A2, NGFR, COL1A1, KLF4	1260	9	8785	3.87346	1	0.469368	41.6385
GOTERM_BP_FAT	GO:0008544~epidermis development	11	0.412448	0.154987	BCL2, COL3A1, COL1A2, ANXA1, PAX6, NGFR, COL1A1, ADAMTS2, KLF4, APC, DHCR24	1260	49	8785	1.56519	1	0.857896	95.3877
GOTERM_BP_FAT	GO:0007398~ectoderm development	11	0.412448	0.203335	BCL2, COL3A1, COL1A2, ANXA1, PAX6, NGFR, COL1A1, ADAMTS2, KLF4, APC, DHCR24	1260	52	8785	1.47489	1	0.905059	98.4279
Annotation Cluster 70	Enrichment Score: 1.2533153412776699
Category	Term	Count	%	PValue	Genes	List Total	Pop Hits	Pop Total	Fold Enrichment	Bonferroni	Benjamini	FDR
SP_PIR_KEYWORDS	FAD	15	0.56243	0.0238366	XDH, CYB5R3, GPD2, ACOX1, D2HGDH, PYROXD2, ACADS, MAOA, MAOB, DDO, POR, NOS3, DPYD, NOS2, GULO	1215	49	7349	1.8516	0.999995	0.309716	29.3967
UP_SEQ_FEATURE	nucleotide phosphate-binding region:FAD	9	0.337458	0.0463091	XDH, CYB5R3, GPD2, ACADS, PYROXD2, NOS3, NOS2, DDO, POR	873	27	5635	2.15158	1	0.975664	56.4219
SP_PIR_KEYWORDS	Flavoprotein	12	0.449944	0.15745	XDH, CYB5R3, GPD2, ACOX1, D2HGDH, ACADS, MAOA, MAOB, DPYD, GULO, DDO, POR	1215	48	7349	1.51214	1	0.676339	91.5579
Annotation Cluster 71	Enrichment Score: 1.2523061780032607
Category	Term	Count	%	PValue	Genes	List Total	Pop Hits	Pop Total	Fold Enrichment	Bonferroni	Benjamini	FDR
GOTERM_BP_FAT	GO:0032103~positive regulation of response to external stimulus	11	0.412448	0.00395363	FCER1A, TNFRSF1A, CDH13, ADAM10, ADORA3, C3, FCGR1A, LBP, CXCL12, KDR, SCG2	1260	28	8785	2.73909	0.999999	0.144129	6.98125
GOTERM_BP_FAT	GO:0050795~regulation of behavior	6	0.224972	0.0520404	CDH13, ADAM10, PTGDS, CXCL12, KDR, SCG2	1260	15	8785	2.78889	1	0.608107	62.3304
GOTERM_BP_FAT	GO:0048520~positive regulation of behavior	5	0.187477	0.0803256	CDH13, ADAM10, CXCL12, KDR, SCG2	1260	12	8785	2.90509	1	0.715009	78.34
GOTERM_BP_FAT	GO:0050920~regulation of chemotaxis	5	0.187477	0.0803256	CDH13, ADAM10, CXCL12, KDR, SCG2	1260	12	8785	2.90509	1	0.715009	78.34
GOTERM_BP_FAT	GO:0050921~positive regulation of chemotaxis	5	0.187477	0.0803256	CDH13, ADAM10, CXCL12, KDR, SCG2	1260	12	8785	2.90509	1	0.715009	78.34
GOTERM_BP_FAT	GO:0050927~positive regulation of positive chemotaxis	4	0.149981	0.126759	CDH13, CXCL12, KDR, SCG2	1260	9	8785	3.09877	1	0.817913	91.5934
GOTERM_BP_FAT	GO:0050926~regulation of positive chemotaxis	4	0.149981	0.126759	CDH13, CXCL12, KDR, SCG2	1260	9	8785	3.09877	1	0.817913	91.5934
Annotation Cluster 72	Enrichment Score: 1.2241296162120447
Category	Term	Count	%	PValue	Genes	List Total	Pop Hits	Pop Total	Fold Enrichment	Bonferroni	Benjamini	FDR
GOTERM_CC_FAT	GO:0001725~stress fiber	5	0.187477	0.0596857	ACTG2, ACTA2, FERMT2, MYH11, FHL3, MYH10	997	11	6966	3.17589	1	0.375903	57.984
GOTERM_CC_FAT	GO:0032432~actin filament bundle	5	0.187477	0.0596857	ACTG2, ACTA2, FERMT2, MYH11, FHL3, MYH10	997	11	6966	3.17589	1	0.375903	57.984
GOTERM_CC_FAT	GO:0042641~actomyosin	5	0.187477	0.0596857	ACTG2, ACTA2, FERMT2, MYH11, FHL3, MYH10	997	11	6966	3.17589	1	0.375903	57.984
Annotation Cluster 73	Enrichment Score: 1.175533291983015
Category	Term	Count	%	PValue	Genes	List Total	Pop Hits	Pop Total	Fold Enrichment	Bonferroni	Benjamini	FDR
GOTERM_BP_FAT	GO:0032963~collagen metabolic process	6	0.224972	0.0130716	P2RX7, TNXB, MMP9, COL1A1, MMP2, ADAMTS2	1260	11	8785	3.80303	1	0.31472	21.3664
GOTERM_BP_FAT	GO:0044259~multicellular organismal macromolecule metabolic process	6	0.224972	0.0198059	P2RX7, TNXB, MMP9, COL1A1, MMP2, ADAMTS2	1260	12	8785	3.48611	1	0.388544	30.6116
GOTERM_BP_FAT	GO:0044236~multicellular organismal metabolic process	6	0.224972	0.0670685	P2RX7, TNXB, MMP9, COL1A1, MMP2, ADAMTS2	1260	16	8785	2.61458	1	0.671768	71.8676
GOTERM_BP_FAT	GO:0044243~multicellular organismal catabolic process	4	0.149981	0.126759	P2RX7, MMP9, MMP2, ADAMTS2	1260	9	8785	3.09877	1	0.817913	91.5934
SP_PIR_KEYWORDS	collagen degradation	3	0.112486	0.193362	MMP9, MMP2, ADAMTS2	1215	5	7349	3.62914	1	0.743802	95.4969
GOTERM_BP_FAT	GO:0030574~collagen catabolic process	3	0.112486	0.207878	MMP9, MMP2, ADAMTS2	1260	6	8785	3.48611	1	0.908551	98.5838
Annotation Cluster 74	Enrichment Score: 1.1701262726337271
Category	Term	Count	%	PValue	Genes	List Total	Pop Hits	Pop Total	Fold Enrichment	Bonferroni	Benjamini	FDR
INTERPRO	IPR013111:EGF, extracellular	10	0.374953	0.0109118	TNXB, EGFL7, DLL4, TNC, FBN1, TEK, ATRN, ITGB5, STAB2, TIE1	1514	24	9171	2.52394	1	0.512056	17.1566
INTERPRO	IPR002049:EGF-like, laminin	6	0.224972	0.134958	PEAR1, LAMB2, TEK, ATRN, STAB2, TIE1	1514	17	9171	2.13793	1	0.979687	91.6844
SMART	SM00180:EGF_Lam	6	0.224972	0.209665	PEAR1, LAMB2, TEK, ATRN, STAB2, TIE1	832	17	4364	1.85124	1	0.924278	95.9411
Annotation Cluster 75	Enrichment Score: 1.144128991654556
Category	Term	Count	%	PValue	Genes	List Total	Pop Hits	Pop Total	Fold Enrichment	Bonferroni	Benjamini	FDR
SP_PIR_KEYWORDS	Isomerase	22	0.824897	0.00833176	P4HB, FKBP9, TBXAS1, FKBP5, HSD3B7, PDIA5, LSS, PDIA4, PUS7, TOP1, ISYNA1, PPIG, PTGIS, PTGDS, PTGES, PPIC, FKBP14, RANBP2, FKBP10, FKBP11, TOP3B, FKBP2	1215	75	7349	1.77424	0.98562	0.150536	11.3717
INTERPRO	IPR001179:Peptidyl-prolyl cis-trans isomerase, FKBP-type	8	0.299963	0.0138255	FKBP9, FKBP8, FKBP7, FKBP5, FKBP14, FKBP10, FKBP11, FKBP2	1514	17	9171	2.85057	1	0.574117	21.2449
SP_PIR_KEYWORDS	Rotamase	9	0.337458	0.0644986	FKBP9, PPIG, FKBP5, PPIC, FKBP14, RANBP2, FKBP10, FKBP11, FKBP2	1215	27	7349	2.01619	1	0.498353	61.7868
GOTERM_MF_FAT	GO:0003755~peptidyl-prolyl cis-trans isomerase activity	9	0.337458	0.0684166	FKBP9, PPIG, FKBP5, PPIC, FKBP14, RANBP2, FKBP10, FKBP11, FKBP2	1384	30	9249	2.00484	1	0.69217	67.6505
GOTERM_MF_FAT	GO:0016859~cis-trans isomerase activity	9	0.337458	0.0806566	FKBP9, PPIG, FKBP5, PPIC, FKBP14, RANBP2, FKBP10, FKBP11, FKBP2	1384	31	9249	1.94017	1	0.726589	73.7942
GOTERM_BP_FAT	GO:0006457~protein folding	20	0.749906	0.342128	FKBP9, FKBP8, FKBP7, FKBP5, CCT6A, CLPX, TOR2A, HSPH1, HSP90B1, ERO1LB, PPIG, DNAJB9, DNAJB11, PPIC, FKBP14, FKBP15, RANBP2, FKBP10, FKBP11, FKBP2	1260	119	8785	1.1718	1	0.971319	99.9524
INTERPRO	IPR002130:Peptidyl-prolyl cis-trans isomerase, cyclophilin-type	3	0.112486	0.698456	PPIG, PPIC, RANBP2	1514	14	9171	1.29803	1	1	100
Annotation Cluster 76	Enrichment Score: 1.1247355296754522
Category	Term	Count	%	PValue	Genes	List Total	Pop Hits	Pop Total	Fold Enrichment	Bonferroni	Benjamini	FDR
GOTERM_BP_FAT	GO:0060537~muscle tissue development	17	0.63742	0.0283372	RBP4, CAV1, ACTA2, RXRA, ELN, HSPG2, MBNL1, ACTG2, APP, MUSK, MEOX2, TSC1, HLX, VAMP5, GAA, PDGFRB, NR2F2, MYH10	1260	68	8785	1.74306	1	0.465183	40.8532
GOTERM_BP_FAT	GO:0014706~striated muscle tissue development	16	0.599925	0.0387477	RBP4, CAV1, ACTA2, RXRA, ELN, HSPG2, MBNL1, ACTG2, APP, MUSK, MEOX2, TSC1, HLX, VAMP5, GAA, NR2F2, MYH10	1260	65	8785	1.71624	1	0.535812	51.4188
GOTERM_BP_FAT	GO:0060538~skeletal muscle organ development	10	0.374953	0.0629557	ACTG2, APP, CAV1, MUSK, MEOX2, ACTA2, HLX, ELN, VAMP5, MBNL1, NR2F2	1260	36	8785	1.93673	1	0.658256	69.5136
GOTERM_BP_FAT	GO:0007519~skeletal muscle tissue development	10	0.374953	0.0629557	ACTG2, APP, CAV1, MUSK, MEOX2, ACTA2, HLX, ELN, VAMP5, MBNL1, NR2F2	1260	36	8785	1.93673	1	0.658256	69.5136
GOTERM_BP_FAT	GO:0007517~muscle organ development	18	0.674916	0.101592	RBP4, CAV1, ACTA2, RXRA, ELN, HSPG2, MBNL1, ACTG2, APP, MUSK, MEOX2, TAGLN, TSC1, HLX, VAMP5, GAA, PDGFRB, NR2F2, MYH10	1260	86	8785	1.4593	1	0.767498	85.8732
GOTERM_BP_FAT	GO:0048738~cardiac muscle tissue development	6	0.224972	0.403696	RBP4, TSC1, RXRA, HSPG2, GAA, MYH10	1260	29	8785	1.44253	1	0.983742	99.9921
Annotation Cluster 77	Enrichment Score: 1.1246502947030297
Category	Term	Count	%	PValue	Genes	List Total	Pop Hits	Pop Total	Fold Enrichment	Bonferroni	Benjamini	FDR
GOTERM_BP_FAT	GO:0006022~aminoglycan metabolic process	10	0.374953	0.0042554	LYVE1, CHID1, BGN, HEXA, CHI3L1, PGLYRP1, ITIH4, ITIH5, ITIH2, DCN	1260	24	8785	2.90509	1	0.152646	7.49474
GOTERM_BP_FAT	GO:0000272~polysaccharide catabolic process	5	0.187477	0.0803256	LYVE1, CHID1, CHI3L1, PGLYRP1, GAA	1260	12	8785	2.90509	1	0.715009	78.34
GOTERM_BP_FAT	GO:0006026~aminoglycan catabolic process	4	0.149981	0.126759	LYVE1, CHID1, CHI3L1, PGLYRP1	1260	9	8785	3.09877	1	0.817913	91.5934
GOTERM_BP_FAT	GO:0016052~carbohydrate catabolic process	9	0.337458	0.732193	LYVE1, CHID1, PFKL, AKR1A1, ALDOB, CHI3L1, PGLYRP1, GAA, BAD	1260	65	8785	0.965385	1	0.999812	100
Annotation Cluster 78	Enrichment Score: 1.123974470535061
Category	Term	Count	%	PValue	Genes	List Total	Pop Hits	Pop Total	Fold Enrichment	Bonferroni	Benjamini	FDR
GOTERM_BP_FAT	GO:0051149~positive regulation of muscle cell differentiation	3	0.112486	0.0556986	BCL2, HOPX, IGFBP3	1260	3	8785	6.97222	1	0.626317	64.8995
GOTERM_BP_FAT	GO:0051147~regulation of muscle cell differentiation	5	0.187477	0.0601524	BCL2, PRDM6, EDN1, HOPX, IGFBP3	1260	11	8785	3.16919	1	0.644547	67.8037
GOTERM_BP_FAT	GO:0051153~regulation of striated muscle cell differentiation	4	0.149981	0.126759	BCL2, EDN1, HOPX, IGFBP3	1260	9	8785	3.09877	1	0.817913	91.5934
Annotation Cluster 79	Enrichment Score: 1.1073039195716508
Category	Term	Count	%	PValue	Genes	List Total	Pop Hits	Pop Total	Fold Enrichment	Bonferroni	Benjamini	FDR
GOTERM_MF_FAT	GO:0008047~enzyme activator activity	34	1.27484	0.00139984	DLC1, CAV1, TBC1D8, ABI1, LTC4S, TIMP2, RASAL2, AGTR1, RASAL1, CDC42EP2, APOA1, TBC1D12, RASGRP3, APOE, FGL2, RASA4, ALS2CL, FN1, RASA2, GIT1, TBC1D10A, TAB1, TBC1D22A, USP6NL, THY1, FBLN1, RALGAPA1, SGSM1, RABEP2, JUN, CHN1, SYNGAP1, IGFBP3, ARAP2	1384	131	9249	1.73447	0.774735	0.065505	2.20606
GOTERM_BP_FAT	GO:0051056~regulation of small GTPase mediated signal transduction	36	1.34983	0.0081601	FGD2, TBC1D8, CSF1, AKAP13, ITSN2, ARFGEF1, MCF2L, RGL1, RASAL2, RASAL1, TBC1D12, RASGRP3, RASGRP4, RASGRP1, PLEKHG5, RAPGEF6, RAPGEF5, RAPGEF3, RASA4, ARHGEF10L, ALS2CL, RASA2, GIT1, TBC1D10A, IGF1, ITPR3, ECT2, FARP1, TBC1D22A, USP6NL, RALGAPA1, SGSM1, TSC1, SYNGAP1, SPATA13, ARAP2	1260	163	8785	1.53988	1	0.246394	13.9019
GOTERM_MF_FAT	GO:0030695~GTPase regulator activity	43	1.6123	0.0272807	DLC1, FGD2, TBC1D8, AKAP13, ITSN2, ARFGEF1, MCF2L, RGL1, RASAL2, RASAL1, CDC42EP2, TBC1D12, RASGRP3, RASGRP4, RASGRP1, PLEKHG5, RAPGEF6, RAPGEF5, RAPGEF3, RASA4, ARHGEF10L, RASA2, ALS2CL, GIT1, TBC1D10A, RAB3IL1, ITPR3, DOCK6, ECT2, FARP1, TBC1D22A, USP6NL, THY1, RALGAPA1, SGSM1, RABEP2, JUN, CHN1, WASL, SYNGAP1, CIT, SPATA13, ARAP2	1384	210	9249	1.36838	1	0.480037	35.6266
GOTERM_MF_FAT	GO:0005096~GTPase activator activity	22	0.824897	0.035438	GIT1, DLC1, TBC1D8, TBC1D10A, TBC1D22A, THY1, USP6NL, RASAL2, RASAL1, CDC42EP2, RALGAPA1, SGSM1, RABEP2, RASGRP3, TBC1D12, JUN, CHN1, SYNGAP1, RASA4, ARAP2, ALS2CL, RASA2	1384	94	9249	1.56406	1	0.528931	43.7058
GOTERM_MF_FAT	GO:0060589~nucleoside-triphosphatase regulator activity	43	1.6123	0.0440207	DLC1, FGD2, TBC1D8, AKAP13, ITSN2, ARFGEF1, MCF2L, RGL1, RASAL2, RASAL1, CDC42EP2, TBC1D12, RASGRP3, RASGRP4, RASGRP1, PLEKHG5, RAPGEF6, RAPGEF5, RAPGEF3, RASA4, ARHGEF10L, RASA2, ALS2CL, GIT1, TBC1D10A, RAB3IL1, ITPR3, DOCK6, ECT2, FARP1, TBC1D22A, USP6NL, THY1, RALGAPA1, SGSM1, RABEP2, JUN, CHN1, WASL, SYNGAP1, CIT, SPATA13, ARAP2	1384	217	9249	1.32424	1	0.594964	51.1742
GOTERM_BP_FAT	GO:0046578~regulation of Ras protein signal transduction	24	0.899888	0.128966	GIT1, FGD2, TBC1D8, TBC1D10A, CSF1, AKAP13, IGF1, ITSN2, ITPR3, ECT2, ARFGEF1, FARP1, MCF2L, TBC1D22A, USP6NL, SGSM1, TSC1, TBC1D12, RASGRP4, PLEKHG5, SPATA13, ARAP2, ARHGEF10L, ALS2CL	1260	126	8785	1.32804	1	0.820241	91.9731
GOTERM_MF_FAT	GO:0005088~Ras guanyl-nucleotide exchange factor activity	13	0.487439	0.134933	FGD2, AKAP13, ITSN2, ITPR3, ECT2, FARP1, MCF2L, RASGRP3, RASGRP4, PLEKHG5, SPATA13, ARHGEF10L, ALS2CL	1384	57	9249	1.52415	1	0.830127	90.0565
GOTERM_MF_FAT	GO:0005085~guanyl-nucleotide exchange factor activity	21	0.787402	0.148116	FGD2, RAB3IL1, AKAP13, ITSN2, ITPR3, ECT2, ARFGEF1, DOCK6, RGL1, FARP1, MCF2L, RASGRP3, RASGRP4, RASGRP1, PLEKHG5, RAPGEF6, RAPGEF5, RAPGEF3, SPATA13, ARHGEF10L, ALS2CL	1384	105	9249	1.33656	1	0.849705	92.2136
GOTERM_MF_FAT	GO:0005083~small GTPase regulator activity	27	1.01237	0.193346	FGD2, TBC1D8, AKAP13, ITSN2, ARFGEF1, MCF2L, CDC42EP2, RASGRP3, TBC1D12, RASGRP4, PLEKHG5, ARHGEF10L, ALS2CL, GIT1, TBC1D10A, ITPR3, ECT2, TBC1D22A, FARP1, USP6NL, THY1, SGSM1, JUN, WASL, CIT, ARAP2, SPATA13	1384	146	9249	1.23586	1	0.90066	96.7339
GOTERM_BP_FAT	GO:0035023~regulation of Rho protein signal transduction	12	0.449944	0.201039	FGD2, TSC1, PLEKHG5, AKAP13, ITSN2, ITPR3, ECT2, SPATA13, FARP1, ARHGEF10L, MCF2L, ALS2CL	1260	58	8785	1.44253	1	0.904937	98.3431
GOTERM_MF_FAT	GO:0005089~Rho guanyl-nucleotide exchange factor activity	11	0.412448	0.262267	FGD2, PLEKHG5, AKAP13, ITSN2, ITPR3, ECT2, SPATA13, FARP1, ARHGEF10L, MCF2L, ALS2CL	1384	53	9249	1.387	1	0.940051	99.2123
INTERPRO	IPR000219:Dbl homology (DH) domain	5	0.187477	0.503153	FGD2, ITPR3, ECT2, ARHGEF10L, ALS2CL	1514	22	9171	1.3767	1	0.999967	99.9994
SMART	SM00325:RhoGEF	5	0.187477	0.626668	FGD2, ITPR3, ECT2, ARHGEF10L, ALS2CL	832	22	4364	1.19209	1	0.99624	99.9999
Annotation Cluster 80	Enrichment Score: 1.0505753259327666
Category	Term	Count	%	PValue	Genes	List Total	Pop Hits	Pop Total	Fold Enrichment	Bonferroni	Benjamini	FDR
GOTERM_MF_FAT	GO:0043560~insulin receptor substrate binding	4	0.149981	0.0468937	PIK3CB, PIK3CA, INSR, PIK3R1	1384	6	9249	4.4552	1	0.605107	53.4592
KEGG_PATHWAY	bta04960:Aldosterone-regulated sodium reabsorption	11	0.412448	0.078633	MAPK1, PDPK1, KRAS, PIK3CB, MAPK3, PIK3CA, IGF1, SLC9A3R2, INSR, PIK3R1, PRKCB	765	40	4940	1.77582	1	0.318611	63.4643
KEGG_PATHWAY	bta04930:Type II diabetes mellitus	10	0.374953	0.19123	MAPK1, SOCS2, SLC2A4, PIK3CB, SOCS1, MAPK3, PIK3CA, ADIPOQ, INSR, PIK3R1	765	42	4940	1.5375	1	0.472875	92.642
Annotation Cluster 81	Enrichment Score: 1.0351606482346194
Category	Term	Count	%	PValue	Genes	List Total	Pop Hits	Pop Total	Fold Enrichment	Bonferroni	Benjamini	FDR
GOTERM_BP_FAT	GO:0030203~glycosaminoglycan metabolic process	8	0.299963	0.0127352	LYVE1, BGN, HEXA, PGLYRP1, ITIH4, ITIH5, ITIH2, DCN	1260	19	8785	2.93567	1	0.310135	20.8753
GOTERM_BP_FAT	GO:0030212~hyaluronan metabolic process	3	0.112486	0.152558	ITIH4, ITIH5, ITIH2	1260	5	8785	4.18333	1	0.855957	95.1394
INTERPRO	IPR010600:Inter-alpha-trypsin inhibitor heavy chain, C-terminal	3	0.112486	0.192956	ITIH4, ITIH5, ITIH2	1514	5	9171	3.63448	1	0.993311	97.4716
INTERPRO	IPR013694:Vault protein inter-alpha-trypsin	3	0.112486	0.192956	ITIH4, ITIH5, ITIH2	1514	5	9171	3.63448	1	0.993311	97.4716
Annotation Cluster 82	Enrichment Score: 1.034904771622652
Category	Term	Count	%	PValue	Genes	List Total	Pop Hits	Pop Total	Fold Enrichment	Bonferroni	Benjamini	FDR
GOTERM_BP_FAT	GO:0048565~gut development	6	0.224972	0.00807157	BCL2, HLX, GATA4, COL3A1, MYB, ADA	1260	10	8785	4.18333	1	0.246223	13.7614
GOTERM_BP_FAT	GO:0055123~digestive system development	3	0.112486	0.207878	BCL2, HLX, GATA4	1260	6	8785	3.48611	1	0.908551	98.5838
GOTERM_BP_FAT	GO:0048546~digestive tract morphogenesis	3	0.112486	0.207878	BCL2, HLX, GATA4	1260	6	8785	3.48611	1	0.908551	98.5838
GOTERM_BP_FAT	GO:0048547~gut morphogenesis	3	0.112486	0.207878	BCL2, HLX, GATA4	1260	6	8785	3.48611	1	0.908551	98.5838
Annotation Cluster 83	Enrichment Score: 1.033300614391631
Category	Term	Count	%	PValue	Genes	List Total	Pop Hits	Pop Total	Fold Enrichment	Bonferroni	Benjamini	FDR
GOTERM_BP_FAT	GO:0010604~positive regulation of macromolecule metabolic process	58	2.17473	0.0191914	ELF1, SNCA, PPARG, PAX6, TLR3, GJA1, TLR4, FOXO3, FOS, AGTR1, SMARCD3, ZNF148, APOE, GATA4, INSR, SERTAD1, RXRA, ELL3, MTF1, JUN, F2, MAPRE3, ACVR1, AVPR2, GCLC, CSF1, CALCOCO1, TNFRSF1A, MEIS2, BCL2, TCEA1, PLAGL2, APC, BCKDHA, FCER1A, EPAS1, TGFBR1, CD276, NR4A1, IGF1, SMAD2, SMAD1, KLF15, ADIPOQ, RNF8, CDH13, P2RX7, S100B, SP1, ETS1, MEOX1, ETS2, RBM14, SELE, APBB1, KLF4, F2R, NFIB	1260	305	8785	1.32587	1	0.385541	29.8126
GOTERM_BP_FAT	GO:0006357~regulation of transcription from RNA polymerase II promoter	46	1.72478	0.0500992	HMGB1, ELF1, PPARG, PAX6, FOXO3, CALCOCO1, KCNIP3, FOS, TNFRSF1A, SORBS3, MEIS2, ZNF148, GATA4, TCEA1, TCEA2, NR2F2, PLAGL2, NR2F1, ATF7IP, SATB1, EPAS1, RXRA, PKIG, LMCD1, IGF1, NR4A1, SMAD2, MED13, SMAD1, MED13L, HLTF, ELL3, CDKN1C, MTF1, SP1, ID1, ETS1, MEOX1, JUN, RNF2, HOPX, ID3, RBM14, APBB1, KLF4, NFIB	1260	247	8785	1.29847	1	0.599478	60.8961
GOTERM_BP_FAT	GO:0010628~positive regulation of gene expression	40	1.49981	0.0681109	AVPR2, ELF1, CSF1, PPARG, PAX6, FOXO3, CALCOCO1, FOS, TNFRSF1A, MEIS2, SMARCD3, ZNF148, GATA4, TCEA1, SERTAD1, PLAGL2, BCKDHA, EPAS1, TGFBR1, RXRA, IGF1, NR4A1, SMAD2, SMAD1, KLF15, ELL3, CDH13, MTF1, SP1, ETS1, MEOX1, JUN, ETS2, RBM14, MAPRE3, APBB1, KLF4, F2R, NFIB, ACVR1	1260	215	8785	1.29716	1	0.672496	72.4363
GOTERM_BP_FAT	GO:0051254~positive regulation of RNA metabolic process	33	1.23735	0.0696455	ELF1, PPARG, PAX6, FOXO3, CALCOCO1, FOS, TNFRSF1A, MEIS2, ZNF148, GATA4, TCEA1, PLAGL2, BCKDHA, EPAS1, RXRA, IGF1, NR4A1, SMAD2, SMAD1, KLF15, ELL3, MTF1, SP1, ETS1, MEOX1, JUN, ETS2, RBM14, MAPRE3, APBB1, KLF4, NFIB, F2R	1260	172	8785	1.33769	1	0.672573	73.2538
GOTERM_BP_FAT	GO:0045893~positive regulation of transcription, DNA-dependent	33	1.23735	0.0696455	ELF1, PPARG, PAX6, FOXO3, CALCOCO1, FOS, TNFRSF1A, MEIS2, ZNF148, GATA4, TCEA1, PLAGL2, BCKDHA, EPAS1, RXRA, IGF1, NR4A1, SMAD2, SMAD1, KLF15, ELL3, MTF1, SP1, ETS1, MEOX1, JUN, ETS2, RBM14, MAPRE3, APBB1, KLF4, NFIB, F2R	1260	172	8785	1.33769	1	0.672573	73.2538
GOTERM_BP_FAT	GO:0045944~positive regulation of transcription from RNA polymerase II promoter	28	1.04987	0.10119	ELF1, PPARG, PAX6, FOXO3, CALCOCO1, FOS, TNFRSF1A, MEIS2, ZNF148, GATA4, TCEA1, PLAGL2, EPAS1, RXRA, IGF1, NR4A1, SMAD2, SMAD1, ELL3, MTF1, SP1, ETS1, MEOX1, JUN, RBM14, APBB1, KLF4, NFIB	1260	147	8785	1.32804	1	0.76879	85.7572
GOTERM_BP_FAT	GO:0045941~positive regulation of transcription	37	1.38733	0.110379	ELF1, PPARG, PAX6, FOXO3, CALCOCO1, FOS, TNFRSF1A, MEIS2, SMARCD3, ZNF148, GATA4, TCEA1, SERTAD1, PLAGL2, BCKDHA, EPAS1, TGFBR1, RXRA, IGF1, NR4A1, SMAD2, SMAD1, KLF15, ELL3, MTF1, SP1, ETS1, MEOX1, JUN, ETS2, RBM14, MAPRE3, APBB1, KLF4, F2R, ACVR1, NFIB	1260	205	8785	1.2584	1	0.788921	88.1951
GOTERM_BP_FAT	GO:0010557~positive regulation of macromolecule biosynthetic process	43	1.6123	0.125684	ELF1, PPARG, PAX6, TLR3, TLR4, FOXO3, CALCOCO1, FOS, TNFRSF1A, MEIS2, SMARCD3, ZNF148, GATA4, TCEA1, INSR, SERTAD1, PLAGL2, BCKDHA, FCER1A, EPAS1, TGFBR1, RXRA, CD276, IGF1, NR4A1, SMAD2, SMAD1, KLF15, ELL3, MTF1, SP1, ETS1, MEOX1, JUN, ETS2, F2, RBM14, APBB1, MAPRE3, KLF4, F2R, NFIB, ACVR1	1260	246	8785	1.21872	1	0.817372	91.4022
GOTERM_BP_FAT	GO:0045935~positive regulation of nucleobase, nucleoside, nucleotide and nucleic acid metabolic process	40	1.49981	0.139427	ELF1, PPARG, PAX6, FOXO3, CALCOCO1, FOS, TNFRSF1A, MEIS2, SMARCD3, ZNF148, APOE, GATA4, TCEA1, INSR, SERTAD1, PLAGL2, BCKDHA, EPAS1, TGFBR1, RXRA, IGF1, NR4A1, SMAD2, SMAD1, KLF15, ELL3, RNF8, MTF1, SP1, ETS1, MEOX1, JUN, ETS2, RBM14, MAPRE3, APBB1, KLF4, F2R, NFIB, ACVR1	1260	229	8785	1.21786	1	0.835882	93.563
GOTERM_BP_FAT	GO:0009891~positive regulation of biosynthetic process	44	1.64979	0.172585	ELF1, PPARG, PAX6, TLR3, TLR4, FOXO3, CALCOCO1, FOS, TNFRSF1A, MEIS2, SMARCD3, ZNF148, APOE, GATA4, TCEA1, INSR, SERTAD1, PLAGL2, BCKDHA, FCER1A, EPAS1, TGFBR1, RXRA, CD276, IGF1, NR4A1, SMAD2, SMAD1, KLF15, ELL3, MTF1, SP1, ETS1, MEOX1, JUN, ETS2, F2, RBM14, APBB1, MAPRE3, KLF4, F2R, NFIB, ACVR1	1260	260	8785	1.17991	1	0.878669	96.8598
GOTERM_BP_FAT	GO:0051173~positive regulation of nitrogen compound metabolic process	40	1.49981	0.187781	ELF1, PPARG, PAX6, FOXO3, CALCOCO1, FOS, TNFRSF1A, MEIS2, SMARCD3, ZNF148, APOE, GATA4, TCEA1, INSR, SERTAD1, PLAGL2, BCKDHA, EPAS1, TGFBR1, RXRA, IGF1, NR4A1, SMAD2, SMAD1, KLF15, ELL3, RNF8, MTF1, SP1, ETS1, MEOX1, JUN, ETS2, RBM14, MAPRE3, APBB1, KLF4, F2R, NFIB, ACVR1	1260	236	8785	1.18173	1	0.893815	97.7619
GOTERM_BP_FAT	GO:0031328~positive regulation of cellular biosynthetic process	43	1.6123	0.197765	ELF1, PPARG, PAX6, TLR3, TLR4, FOXO3, CALCOCO1, FOS, TNFRSF1A, MEIS2, SMARCD3, ZNF148, APOE, GATA4, TCEA1, INSR, SERTAD1, PLAGL2, BCKDHA, FCER1A, EPAS1, TGFBR1, RXRA, CD276, IGF1, NR4A1, SMAD2, SMAD1, KLF15, ELL3, MTF1, SP1, ETS1, MEOX1, JUN, ETS2, RBM14, MAPRE3, APBB1, KLF4, F2R, NFIB, ACVR1	1260	257	8785	1.16656	1	0.903579	98.2145
Annotation Cluster 84	Enrichment Score: 1.0282397651758086
Category	Term	Count	%	PValue	Genes	List Total	Pop Hits	Pop Total	Fold Enrichment	Bonferroni	Benjamini	FDR
GOTERM_CC_FAT	GO:0005813~centrosome	22	0.824897	0.00118975	SNCG, LZTS2, NDN, ROCK2, HAUS2, DLGAP5, ALDOB, ESPL1, GPR4, CCNB1, PCGF5, FAM125A, DCAF12, NEDD1, PLK4, CEP57, PROCR, NUDT21, ODF2, NDRG2, UBXN6, APC	997	74	6966	2.0772	0.399929	0.0240261	1.66338
GOTERM_CC_FAT	GO:0005815~microtubule organizing center	22	0.824897	0.00956941	SNCG, LZTS2, NDN, ROCK2, HAUS2, DLGAP5, ALDOB, ESPL1, GPR4, CCNB1, PCGF5, FAM125A, DCAF12, NEDD1, PLK4, CEP57, PROCR, NUDT21, ODF2, NDRG2, UBXN6, APC	997	87	6966	1.76682	0.983837	0.114254	12.6706
GOTERM_CC_FAT	GO:0015630~microtubule cytoskeleton	41	1.53731	0.0610028	KIF23, SNCG, LZTS2, PARD3, NDN, NEK2, HAUS2, ALDOB, AURKB, GPR4, PCGF5, FAM125A, DCAF12, APP, CEP57, PBXIP1, PROCR, MAP1LC3A, NUDT21, ODF2, STRBP, NDRG2, TUBA1C, ASPM, APC, KIF2A, CKAP2, KIF3A, KIF5B, ROCK2, DLGAP5, NUSAP1, ESPL1, SMC3, CCNB1, NEDD1, PLK4, LYST, STMN1, UBXN6, MYH10	997	220	6966	1.30212	1	0.377323	58.8056
GOTERM_CC_FAT	GO:0005856~cytoskeleton	91	3.41207	0.18111	KIF23, SNCG, LZTS2, PDLIM7, S100A8, MYO7A, S100A9, SNCA, FERMT2, PDLIM2, PDLIM1, AURKB, DSTN, PCGF5, ACTG2, FAM125A, APP, DCAF12, DES, MAP1LC3A, PBXIP1, GSN, NOS3, LMOD1, NOS2, TUBA1C, ASPM, KIF2A, ADAM10, KIF5B, ACTA2, ROCK2, FBLIM1, NUSAP1, ESPL1, CTNNA1, FARP1, JUP, PLEKHH3, CGN, LYST, FRMD4A, SGCE, TGFB1I1, STMN1, WASL, ADD3, ALDH9A1, PARD3, NDN, NEK2, HAUS2, VIM, ALDOB, EPB41L4A, FHL3, TPM2,…	997	575	6966	1.10576	1	0.706103	94.0112
GOTERM_CC_FAT	GO:0044430~cytoskeletal part	58	2.17473	0.559312	KIF23, SNCG, LZTS2, MYO7A, FERMT2, AURKB, DSTN, FAM125A, ACTG2, PCGF5, DCAF12, APP, DES, PBXIP1, MAP1LC3A, TUBA1C, ASPM, KIF2A, ADAM10, KIF5B, ROCK2, ACTA2, NUSAP1, ESPL1, CGN, STMN1, PARD3, NDN, NEK2, HAUS2, ALDOB, VIM, FHL3, GPR4, CEP57, PROCR, NUDT21, ODF2, NDRG2, APC, MYO5C, CKAP2, NES, KIF3A, MYO1E, DLGAP5, MYO1D, LMNA, MYO1G, MYO1F, SMC3, CCNB1, NEDD1, PLK4, TSC1, MYH11, MYH14, UBXN6, MYH10	997	403	6966	1.00557	1	0.94916	99.999
GOTERM_CC_FAT	GO:0043232~intracellular non-membrane-bounded organelle	148	5.54931	0.949547	SNCG, PRPF4B, S100A8, PDLIM7, S100A9, SNCA, PDLIM2, PDLIM1, AURKB, CBX5, ACTG2, FAM125A, TOP1, APP, EED, ASPM, SATB1, KIF5B, ROCK2, SGOL2, SGOL1, ESPL1, H2AFJ, CTNNA1, FARP1, JUP, ABT1, CGN, LYST, PRDM6, STMN1, TGFB1I1, ADD3, HMGB1, HMGB3, NEK2, ALDOB, CDC42EP1, PROCR, MRPL54, STRBP, NDRG2, ERCC6L, CKAP2, SMCHD1, KIF3A, NFE2, EPB41, MYO1E, MYO1D, MYO1G, JRKL, MYO1F, BRCA1, ZBTB43, S100A12, SUV39H…	997	1148	6966	0.900758	1	0.999595	100
GOTERM_CC_FAT	GO:0043228~non-membrane-bounded organelle	148	5.54931	0.949547	SNCG, PRPF4B, S100A8, PDLIM7, S100A9, SNCA, PDLIM2, PDLIM1, AURKB, CBX5, ACTG2, FAM125A, TOP1, APP, EED, ASPM, SATB1, KIF5B, ROCK2, SGOL2, SGOL1, ESPL1, H2AFJ, CTNNA1, FARP1, JUP, ABT1, CGN, LYST, PRDM6, STMN1, TGFB1I1, ADD3, HMGB1, HMGB3, NEK2, ALDOB, CDC42EP1, PROCR, MRPL54, STRBP, NDRG2, ERCC6L, CKAP2, SMCHD1, KIF3A, NFE2, EPB41, MYO1E, MYO1D, MYO1G, JRKL, MYO1F, BRCA1, ZBTB43, S100A12, SUV39H…	997	1148	6966	0.900758	1	0.999595	100
Annotation Cluster 85	Enrichment Score: 1.024531067851453
Category	Term	Count	%	PValue	Genes	List Total	Pop Hits	Pop Total	Fold Enrichment	Bonferroni	Benjamini	FDR
UP_SEQ_FEATURE	domain:PDZ	7	0.262467	0.0759107	PDLIM7, SNX27, PDLIM4, LIN7C, PDLIM2, MPP7, PDLIM1	873	20	5635	2.25916	1	0.991426	74.9166
UP_SEQ_FEATURE	domain:LIM zinc-binding	4	0.149981	0.0796168	CRIP1, PDLIM4, PDLIM2, PDLIM1	873	7	5635	3.68843	1	0.990382	76.6217
PIR_SUPERFAMILY	PIRSF018094:PDZ and LIM domain protein	3	0.112486	0.139669	PDLIM4, PDLIM2, PDLIM1	671	4	3890	4.34799	1	0.999999	89.531
Annotation Cluster 86	Enrichment Score: 1.0207803813298866
Category	Term	Count	%	PValue	Genes	List Total	Pop Hits	Pop Total	Fold Enrichment	Bonferroni	Benjamini	FDR
GOTERM_BP_FAT	GO:0048705~skeletal system morphogenesis	13	0.487439	0.0464431	TGFBR1, HSPG2, MMP2, HOXB3, P2RX7, CTGF, HOXA5, PRKRA, PDGFRA, PDGFRB, COL1A1, COL11A2, PLEKHA1	1260	50	8785	1.81278	1	0.580728	58.0533
GOTERM_BP_FAT	GO:0051216~cartilage development	9	0.337458	0.103318	HOXB3, CTGF, HOXA5, EDN1, PTH1R, HSPG2, MGP, COL1A1, COL11A2	1260	34	8785	1.84559	1	0.772171	86.361
GOTERM_BP_FAT	GO:0048706~embryonic skeletal system development	7	0.262467	0.180534	HOXB3, RBP4, SP1, HOXA5, TGFBR1, HSPG2, COL1A1	1260	27	8785	1.80761	1	0.887883	97.3676
Annotation Cluster 87	Enrichment Score: 1.014285537588492
Category	Term	Count	%	PValue	Genes	List Total	Pop Hits	Pop Total	Fold Enrichment	Bonferroni	Benjamini	FDR
GOTERM_BP_FAT	GO:0017148~negative regulation of translation	7	0.262467	0.00364367	EIF2C2, EIF4EBP1, TSC1, PAIP2, TIA1, EIF2C3, IGFBP5	1260	12	8785	4.06713	0.999996	0.136521	6.45103
GOTERM_BP_FAT	GO:0032269~negative regulation of cellular protein metabolic process	14	0.524934	0.0150524	A2M, CAV1, EIF2C2, GCLC, PAIP2, SNCA, ITGB3, TIMP3, EIF4EBP1, TSC1, TIA1, JUN, EIF2C3, IGFBP5	1260	48	8785	2.03356	1	0.341682	24.2
GOTERM_BP_FAT	GO:0051248~negative regulation of protein metabolic process	14	0.524934	0.0178784	A2M, CAV1, EIF2C2, GCLC, PAIP2, SNCA, ITGB3, TIMP3, EIF4EBP1, TSC1, TIA1, JUN, EIF2C3, IGFBP5	1260	49	8785	1.99206	1	0.375433	28.0762
GOTERM_BP_FAT	GO:0045947~negative regulation of translational initiation	3	0.112486	0.0556986	EIF2C2, EIF4EBP1, PAIP2	1260	3	8785	6.97222	1	0.626317	64.8995
GOTERM_BP_FAT	GO:0006417~regulation of translation	11	0.412448	0.220731	EIF2C2, EIF4EBP1, TSC1, S100B, ACO1, PAIP2, TIA1, QKI, EIF2C3, IGFBP5, APLP1	1260	53	8785	1.44706	1	0.917299	98.9497
GOTERM_BP_FAT	GO:0010608~posttranscriptional regulation of gene expression	15	0.56243	0.313506	EIF2C2, ACO1, PAIP2, DICER1, APLP1, EIF4EBP1, APOA1, TSC1, S100B, BCL2, TIA1, PRKRA, QKI, EIF2C3, IGFBP5	1260	84	8785	1.24504	1	0.962994	99.8963
SP_PIR_KEYWORDS	translation regulation	5	0.187477	0.541473	EIF2C2, EIF4EBP1, PAIP2, QKI, EIF2C3	1215	23	7349	1.3149	1	0.961885	99.9987
GOTERM_BP_FAT	GO:0031400~negative regulation of protein modification process	5	0.187477	0.55449	CAV1, GCLC, TSC1, JUN, SNCA	1260	27	8785	1.29115	1	0.996953	100
GOTERM_BP_FAT	GO:0006446~regulation of translational initiation	3	0.112486	0.655439	EIF2C2, EIF4EBP1, PAIP2	1260	15	8785	1.39444	1	0.999303	100
Annotation Cluster 88	Enrichment Score: 1.013162703858297
Category	Term	Count	%	PValue	Genes	List Total	Pop Hits	Pop Total	Fold Enrichment	Bonferroni	Benjamini	FDR
INTERPRO	IPR011626:A-macroglobulin complement component	3	0.112486	0.0726412	A2M, C4A, C3	1514	3	9171	6.05746	1	0.922004	72.575
INTERPRO	IPR019565:Alpha-2-macroglobulin, thiol-ester bond-forming	3	0.112486	0.0726412	A2M, C4A, C3	1514	3	9171	6.05746	1	0.922004	72.575
INTERPRO	IPR009048:Alpha-macroglobulin, receptor-binding	3	0.112486	0.129566	A2M, C4A, C3	1514	4	9171	4.5431	1	0.978389	90.7491
INTERPRO	IPR019742:Alpha-2-macroglobulin, conserved site	3	0.112486	0.129566	A2M, C4A, C3	1514	4	9171	4.5431	1	0.978389	90.7491
Annotation Cluster 89	Enrichment Score: 1.0079293285067015
Category	Term	Count	%	PValue	Genes	List Total	Pop Hits	Pop Total	Fold Enrichment	Bonferroni	Benjamini	FDR
GOTERM_BP_FAT	GO:0010743~regulation of foam cell differentiation	5	0.187477	0.0290479	MSR1, CSF1, PPARG, ITGB3, ADIPOQ	1260	9	8785	3.87346	1	0.469368	41.6385
GOTERM_BP_FAT	GO:0010871~negative regulation of receptor biosynthetic process	3	0.112486	0.100908	PPARG, ITGB3, ADIPOQ	1260	4	8785	5.22917	1	0.770523	85.6754
GOTERM_BP_FAT	GO:0010745~negative regulation of foam cell differentiation	3	0.112486	0.152558	PPARG, ITGB3, ADIPOQ	1260	5	8785	4.18333	1	0.855957	95.1394
GOTERM_BP_FAT	GO:0010869~regulation of receptor biosynthetic process	3	0.112486	0.207878	PPARG, ITGB3, ADIPOQ	1260	6	8785	3.48611	1	0.908551	98.5838
Annotation Cluster 90	Enrichment Score: 0.9876118838577671
Category	Term	Count	%	PValue	Genes	List Total	Pop Hits	Pop Total	Fold Enrichment	Bonferroni	Benjamini	FDR
GOTERM_BP_FAT	GO:0006897~endocytosis	18	0.674916	0.0476623	MICALL2, MSR1, SNCA, NOSTRIN, COLEC12, MARCH2, DAB2, P2RX7, RABEP2, APOE, FCGR1A, ITGAV, RAB34, STEAP2, PLA2R1, SCARA5, EHD2, ELMOD2	1260	78	8785	1.60897	1	0.58847	59.0223
GOTERM_BP_FAT	GO:0010324~membrane invagination	18	0.674916	0.0476623	MICALL2, MSR1, SNCA, NOSTRIN, COLEC12, MARCH2, DAB2, P2RX7, RABEP2, APOE, FCGR1A, ITGAV, RAB34, STEAP2, PLA2R1, SCARA5, EHD2, ELMOD2	1260	78	8785	1.60897	1	0.58847	59.0223
GOTERM_BP_FAT	GO:0016044~membrane organization	25	0.937383	0.119388	PLDN, MSR1, SNCA, NOSTRIN, CD9, DAB2, APOE, FCGR1A, BCL2, ITGAV, TIE1, PLA2R1, EHD2, ELMOD2, DHCR24, MICALL2, LMNA, COLEC12, MARCH2, P2RX7, RABEP2, RAB34, STEAP2, SCARA5, MYH10	1260	131	8785	1.33058	1	0.80719	90.1981
GOTERM_BP_FAT	GO:0016192~vesicle-mediated transport	39	1.46232	0.413278	CLTA, MSR1, ADORA3, CLTB, EXOC8, AP2S1, VPS54, SNCA, NOSTRIN, MUDENG, DAB2, GSN, APOE, ITGAV, FCGR1A, EXOC5, PLA2R1, EHD2, KDELR1, SEC24D, ELMOD2, RAB27A, SCAMP5, MICALL2, STX1A, STXBP2, LIN7C, COLEC12, MARCH2, P2RX7, RABEP2, STXBP5, LYST, RAB34, VAMP5, STEAP2, UNC13B, SCARA5, MYH10	1260	254	8785	1.07054	1	0.984994	99.9941
Annotation Cluster 91	Enrichment Score: 0.9872557446478584
Category	Term	Count	%	PValue	Genes	List Total	Pop Hits	Pop Total	Fold Enrichment	Bonferroni	Benjamini	FDR
GOTERM_BP_FAT	GO:0046324~regulation of glucose import	5	0.187477	0.0601524	ASPSCR1, GRB10, ADIPOQ, INSR, PIK3R1	1260	11	8785	3.16919	1	0.644547	67.8037
GOTERM_BP_FAT	GO:0010827~regulation of glucose transport	5	0.187477	0.0803256	ASPSCR1, GRB10, ADIPOQ, INSR, PIK3R1	1260	12	8785	2.90509	1	0.715009	78.34
GOTERM_BP_FAT	GO:0046326~positive regulation of glucose import	3	0.112486	0.152558	ADIPOQ, INSR, PIK3R1	1260	5	8785	4.18333	1	0.855957	95.1394
GOTERM_BP_FAT	GO:0010828~positive regulation of glucose transport	3	0.112486	0.152558	ADIPOQ, INSR, PIK3R1	1260	5	8785	4.18333	1	0.855957	95.1394
Annotation Cluster 92	Enrichment Score: 0.9791878232065697
Category	Term	Count	%	PValue	Genes	List Total	Pop Hits	Pop Total	Fold Enrichment	Bonferroni	Benjamini	FDR
GOTERM_BP_FAT	GO:0010906~regulation of glucose metabolic process	4	0.149981	0.0656815	IGF1, NR3C1, ADIPOQ, INSR	1260	7	8785	3.98413	1	0.669044	71.0936
GOTERM_BP_FAT	GO:0006109~regulation of carbohydrate metabolic process	4	0.149981	0.0941887	IGF1, NR3C1, ADIPOQ, INSR	1260	8	8785	3.48611	1	0.755575	83.5883
GOTERM_BP_FAT	GO:0010675~regulation of cellular carbohydrate metabolic process	4	0.149981	0.0941887	IGF1, NR3C1, ADIPOQ, INSR	1260	8	8785	3.48611	1	0.755575	83.5883
GOTERM_BP_FAT	GO:0043255~regulation of carbohydrate biosynthetic process	3	0.112486	0.207878	NR3C1, ADIPOQ, INSR	1260	6	8785	3.48611	1	0.908551	98.5838
Annotation Cluster 93	Enrichment Score: 0.975296531985852
Category	Term	Count	%	PValue	Genes	List Total	Pop Hits	Pop Total	Fold Enrichment	Bonferroni	Benjamini	FDR
GOTERM_BP_FAT	GO:0043408~regulation of MAPKKK cascade	17	0.63742	8.57873e-05	FCER1A, SH3RF1, CAV1, CARD9, TNXB, EDN1, TLR3, IGF2, TLR4, TIMP2, SORBS3, P2RX7, NENF, INSR, MAP3K11, APC, F2R	1260	41	8785	2.89092	0.254152	0.00834311	0.156603
GOTERM_BP_FAT	GO:0043410~positive regulation of MAPKKK cascade	9	0.337458	0.0115492	P2RX7, SORBS3, CARD9, TLR3, TLR4, IGF2, NENF, INSR, F2R	1260	23	8785	2.72826	1	0.296277	19.1207
GOTERM_BP_FAT	GO:0046328~regulation of JNK cascade	8	0.299963	0.0127352	FCER1A, SH3RF1, TNXB, CARD9, EDN1, TLR3, TLR4, MAP3K11	1260	19	8785	2.93567	1	0.310135	20.8753
GOTERM_BP_FAT	GO:0070302~regulation of stress-activated protein kinase signaling pathway	8	0.299963	0.0172206	FCER1A, SH3RF1, TNXB, CARD9, EDN1, TLR3, TLR4, MAP3K11	1260	20	8785	2.78889	1	0.371142	27.1911
GOTERM_BP_FAT	GO:0080135~regulation of cellular response to stress	11	0.412448	0.0374184	RNF8, FCER1A, SH3RF1, TNXB, CARD9, USP1, EDN1, TLR3, TLR4, APBB1, MAP3K11	1260	38	8785	2.01827	1	0.531327	50.1766
GOTERM_BP_FAT	GO:0002237~response to molecule of bacterial origin	9	0.337458	0.103318	P2RX7, STAT4, CARD9, KCNJ8, BDKRB1, TLR4, LBP, STAT1, CD14, F2R	1260	34	8785	1.84559	1	0.772171	86.361
GOTERM_BP_FAT	GO:0032755~positive regulation of interleukin-6 production	5	0.187477	0.157058	P2RX7, CARD9, TLR3, TLR4, LBP	1260	15	8785	2.32407	1	0.860025	95.5899
GOTERM_BP_FAT	GO:0032496~response to lipopolysaccharide	7	0.262467	0.180534	P2RX7, STAT4, KCNJ8, BDKRB1, TLR4, LBP, STAT1, F2R	1260	27	8785	1.80761	1	0.887883	97.3676
GOTERM_BP_FAT	GO:0032760~positive regulation of tumor necrosis factor production	4	0.149981	0.241326	CARD9, TLR3, TLR4, LBP	1260	12	8785	2.32407	1	0.93312	99.3561
GOTERM_BP_FAT	GO:0043506~regulation of JUN kinase activity	3	0.112486	0.264756	FCER1A, TNXB, EDN1	1260	7	8785	2.9881	1	0.94431	99.637
GOTERM_BP_FAT	GO:0032680~regulation of tumor necrosis factor production	5	0.187477	0.319886	CARD9, TLR3, TLR4, LBP, ADIPOQ	1260	20	8785	1.74306	1	0.964111	99.9126
GOTERM_BP_FAT	GO:0046330~positive regulation of JNK cascade	3	0.112486	0.377284	CARD9, TLR3, TLR4	1260	9	8785	2.32407	1	0.978821	99.9825
GOTERM_BP_FAT	GO:0070304~positive regulation of stress-activated protein kinase signaling pathway	3	0.112486	0.377284	CARD9, TLR3, TLR4	1260	9	8785	2.32407	1	0.978821	99.9825
GOTERM_MF_FAT	GO:0001530~lipopolysaccharide binding	3	0.112486	0.398929	P2RX7, TLR4, LBP	1384	9	9249	2.2276	1	0.979688	99.9698
GOTERM_BP_FAT	GO:0032675~regulation of interleukin-6 production	5	0.187477	0.457637	P2RX7, CARD9, TLR3, TLR4, LBP	1260	24	8785	1.45255	1	0.990411	99.9986
GOTERM_BP_FAT	GO:0001819~positive regulation of cytokine production	8	0.299963	0.470977	CD83, P2RX7, CARD9, IL18, TLR3, TLR4, POLR3A, LBP	1260	45	8785	1.23951	1	0.991718	99.9991
GOTERM_BP_FAT	GO:0042035~regulation of cytokine biosynthetic process	6	0.224972	0.652273	FCER1A, CARD9, TIA1, CD276, TLR3, TLR4	1260	38	8785	1.10088	1	0.999269	100
GOTERM_BP_FAT	GO:0042108~positive regulation of cytokine biosynthetic process	4	0.149981	0.716343	FCER1A, CD276, TLR3, TLR4	1260	25	8785	1.11556	1	0.999743	100
Annotation Cluster 94	Enrichment Score: 0.9740450507277656
Category	Term	Count	%	PValue	Genes	List Total	Pop Hits	Pop Total	Fold Enrichment	Bonferroni	Benjamini	FDR
INTERPRO	IPR017448:Speract/scavenger receptor related	6	0.224972	0.0864662	LGALS3BP, MSR1, CD5L, LOXL2, SCARA5, DMBT1	1514	15	9171	2.42299	1	0.948037	78.8046
INTERPRO	IPR001190:Speract/scavenger receptor	6	0.224972	0.0864662	LGALS3BP, MSR1, CD5L, LOXL2, SCARA5, DMBT1	1514	15	9171	2.42299	1	0.948037	78.8046
GOTERM_MF_FAT	GO:0005044~scavenger receptor activity	11	0.412448	0.111285	LGALS3BP, MSR1, CXCL16, SRCRB4D, CD5L, VTN, STAB2, LOXL2, SCARA5, DMBT1, CD163	1384	44	9249	1.6707	1	0.791772	84.7222
UP_SEQ_FEATURE	domain:SRCR	3	0.112486	0.115692	LGALS3BP, MSR1, SCARA5	873	4	5635	4.84107	1	0.99572	88.3958
SMART	SM00202:SR	6	0.224972	0.140069	LGALS3BP, MSR1, CD5L, LOXL2, SCARA5, DMBT1	832	15	4364	2.09808	1	0.861009	87.1903
Annotation Cluster 95	Enrichment Score: 0.9705042470177428
Category	Term	Count	%	PValue	Genes	List Total	Pop Hits	Pop Total	Fold Enrichment	Bonferroni	Benjamini	FDR
GOTERM_BP_FAT	GO:0060284~regulation of cell development	16	0.599925	0.0227777	B4GALT1, IRX3, EFNA1, EDN1, PAX6, SMAD2, TIMP2, CTNNA1, THY1, YWHAG, SERPINF1, BCL2, TGFB1I1, SEMA4D, IGFBP3, ASPM	1260	61	8785	1.82878	1	0.412645	34.3559
GOTERM_BP_FAT	GO:0045664~regulation of neuron differentiation	9	0.337458	0.16814	IRX3, YWHAG, EFNA1, BCL2, PAX6, SEMA4D, TIMP2, ASPM, THY1	1260	38	8785	1.65132	1	0.87465	96.537
GOTERM_BP_FAT	GO:0050767~regulation of neurogenesis	11	0.412448	0.17042	IRX3, YWHAG, SERPINF1, EFNA1, BCL2, PAX6, SEMA4D, TIMP2, CTNNA1, ASPM, THY1	1260	50	8785	1.53389	1	0.87678	96.7063
GOTERM_BP_FAT	GO:0051960~regulation of nervous system development	12	0.449944	0.201039	IRX3, YWHAG, SERPINF1, EFNA1, BCL2, PAX6, IGF1, SEMA4D, TIMP2, CTNNA1, ASPM, THY1	1260	58	8785	1.44253	1	0.904937	98.3431
Annotation Cluster 96	Enrichment Score: 0.9641106029512941
Category	Term	Count	%	PValue	Genes	List Total	Pop Hits	Pop Total	Fold Enrichment	Bonferroni	Benjamini	FDR
GOTERM_BP_FAT	GO:0009991~response to extracellular stimulus	14	0.524934	0.049884	RBP4, RXRA, GSDMD, AQP3, ASGR1, FOS, P2RX7, ALB, RASGRP4, SFRP2, TIE1, KLF4, MEST, SPP1	1260	56	8785	1.74306	1	0.599773	60.7339
GOTERM_BP_FAT	GO:0033273~response to vitamin	7	0.262467	0.0688127	RBP4, RXRA, TIE1, KLF4, AQP3, SPP1, MEST	1260	21	8785	2.32407	1	0.66967	72.8131
GOTERM_BP_FAT	GO:0007584~response to nutrient	7	0.262467	0.10006	RBP4, RXRA, TIE1, KLF4, AQP3, SPP1, MEST	1260	23	8785	2.12198	1	0.771644	85.4267
GOTERM_BP_FAT	GO:0032526~response to retinoic acid	6	0.224972	0.103485	RBP4, RXRA, TIE1, KLF4, AQP3, MEST	1260	18	8785	2.32407	1	0.770077	86.4072
GOTERM_BP_FAT	GO:0033189~response to vitamin A	6	0.224972	0.103485	RBP4, RXRA, TIE1, KLF4, AQP3, MEST	1260	18	8785	2.32407	1	0.770077	86.4072
GOTERM_BP_FAT	GO:0031667~response to nutrient levels	8	0.299963	0.446367	RBP4, ALB, RXRA, TIE1, KLF4, AQP3, SPP1, MEST	1260	44	8785	1.26768	1	0.989012	99.998
Annotation Cluster 97	Enrichment Score: 0.9640609123688673
Category	Term	Count	%	PValue	Genes	List Total	Pop Hits	Pop Total	Fold Enrichment	Bonferroni	Benjamini	FDR
GOTERM_BP_FAT	GO:0050727~regulation of inflammatory response	12	0.449944	0.00199244	FCER1A, TNFRSF1A, GPX1, A2M, ADORA3, S100B, C3, AOAH, FCGR1A, CD276, LBP, ADA	1260	30	8785	2.78889	0.998905	0.0915482	3.5779
GOTERM_BP_FAT	GO:0002673~regulation of acute inflammatory response	6	0.224972	0.00457134	FCER1A, A2M, S100B, C3, FCGR1A, LBP	1260	9	8785	4.64815	1	0.16135	8.02946
GOTERM_BP_FAT	GO:0002675~positive regulation of acute inflammatory response	4	0.149981	0.0234327	FCER1A, C3, FCGR1A, LBP	1260	5	8785	5.57778	1	0.419541	35.155
GOTERM_BP_FAT	GO:0050729~positive regulation of inflammatory response	6	0.224972	0.0284634	FCER1A, TNFRSF1A, ADORA3, C3, FCGR1A, LBP	1260	13	8785	3.21795	1	0.464567	40.9934
GOTERM_BP_FAT	GO:0002714~positive regulation of B cell mediated immunity	4	0.149981	0.0419191	FCER1A, C3, FCGR1A, PVRL2	1260	6	8785	4.64815	1	0.56058	54.2649
GOTERM_BP_FAT	GO:0002891~positive regulation of immunoglobulin mediated immune response	4	0.149981	0.0419191	FCER1A, C3, FCGR1A, PVRL2	1260	6	8785	4.64815	1	0.56058	54.2649
GOTERM_BP_FAT	GO:0002699~positive regulation of immune effector process	9	0.337458	0.0463096	FCER1A, P2RX7, CRTAM, ADORA3, S100B, C3, FCGR1A, PVRL2, LBP	1260	29	8785	2.16379	1	0.581608	57.9459
GOTERM_BP_FAT	GO:0002861~regulation of inflammatory response to antigenic stimulus	4	0.149981	0.0656815	FCER1A, GPX1, C3, FCGR1A	1260	7	8785	3.98413	1	0.669044	71.0936
GOTERM_BP_FAT	GO:0002886~regulation of myeloid leukocyte mediated immunity	4	0.149981	0.0656815	FCER1A, ADORA3, C3, FCGR1A	1260	7	8785	3.98413	1	0.669044	71.0936
GOTERM_BP_FAT	GO:0002697~regulation of immune effector process	12	0.449944	0.0829557	FCER1A, RBP4, P2RX7, CRTAM, A2M, ADORA3, APOA1, S100B, C3, FCGR1A, PVRL2, LBP	1260	49	8785	1.70748	1	0.723887	79.4441
GOTERM_BP_FAT	GO:0002863~positive regulation of inflammatory response to antigenic stimulus	3	0.112486	0.100908	FCER1A, C3, FCGR1A	1260	4	8785	5.22917	1	0.770523	85.6754
GOTERM_BP_FAT	GO:0002866~positive regulation of acute inflammatory response to antigenic stimulus	3	0.112486	0.100908	FCER1A, C3, FCGR1A	1260	4	8785	5.22917	1	0.770523	85.6754
GOTERM_BP_FAT	GO:0002885~positive regulation of hypersensitivity	3	0.112486	0.100908	FCER1A, C3, FCGR1A	1260	4	8785	5.22917	1	0.770523	85.6754
GOTERM_BP_FAT	GO:0031349~positive regulation of defense response	9	0.337458	0.103318	FCER1A, TNFRSF1A, CRTAM, ADORA3, CARD9, C3, FCGR1A, PVRL2, LBP	1260	34	8785	1.84559	1	0.772171	86.361
GOTERM_BP_FAT	GO:0002821~positive regulation of adaptive immune response	6	0.224972	0.103485	FCER1A, P2RX7, C3, FCGR1A, PVRL2, ADA	1260	18	8785	2.32407	1	0.770077	86.4072
GOTERM_BP_FAT	GO:0002824~positive regulation of adaptive immune response based on somatic recombination of immune receptors built from immunoglobulin superfamily domains	6	0.224972	0.103485	FCER1A, P2RX7, C3, FCGR1A, PVRL2, ADA	1260	18	8785	2.32407	1	0.770077	86.4072
GOTERM_BP_FAT	GO:0002819~regulation of adaptive immune response	8	0.299963	0.145508	FCER1A, P2RX7, C3, HLX, FCGR1A, PVRL2, SOCS5, ADA	1260	31	8785	1.79928	1	0.846298	94.3452
GOTERM_BP_FAT	GO:0002822~regulation of adaptive immune response based on somatic recombination of immune receptors built from immunoglobulin superfamily domains	8	0.299963	0.145508	FCER1A, P2RX7, C3, HLX, FCGR1A, PVRL2, SOCS5, ADA	1260	31	8785	1.79928	1	0.846298	94.3452
GOTERM_BP_FAT	GO:0002708~positive regulation of lymphocyte mediated immunity	6	0.224972	0.198454	FCER1A, P2RX7, CRTAM, C3, FCGR1A, PVRL2	1260	22	8785	1.90152	1	0.903758	98.2423
GOTERM_BP_FAT	GO:0002705~positive regulation of leukocyte mediated immunity	6	0.224972	0.198454	FCER1A, P2RX7, CRTAM, C3, FCGR1A, PVRL2	1260	22	8785	1.90152	1	0.903758	98.2423
GOTERM_BP_FAT	GO:0033005~positive regulation of mast cell activation	3	0.112486	0.207878	FCER1A, ADORA3, PVRL2	1260	6	8785	3.48611	1	0.908551	98.5838
GOTERM_BP_FAT	GO:0033003~regulation of mast cell activation	3	0.112486	0.207878	FCER1A, ADORA3, PVRL2	1260	6	8785	3.48611	1	0.908551	98.5838
GOTERM_BP_FAT	GO:0002864~regulation of acute inflammatory response to antigenic stimulus	3	0.112486	0.207878	FCER1A, C3, FCGR1A	1260	6	8785	3.48611	1	0.908551	98.5838
GOTERM_BP_FAT	GO:0002883~regulation of hypersensitivity	3	0.112486	0.207878	FCER1A, C3, FCGR1A	1260	6	8785	3.48611	1	0.908551	98.5838
GOTERM_BP_FAT	GO:0002712~regulation of B cell mediated immunity	4	0.149981	0.282711	FCER1A, C3, FCGR1A, PVRL2	1260	13	8785	2.1453	1	0.952006	99.7689
GOTERM_BP_FAT	GO:0002889~regulation of immunoglobulin mediated immune response	4	0.149981	0.282711	FCER1A, C3, FCGR1A, PVRL2	1260	13	8785	2.1453	1	0.952006	99.7689
GOTERM_BP_FAT	GO:0031343~positive regulation of cell killing	4	0.149981	0.324618	P2RX7, CRTAM, PVRL2, NOS2	1260	14	8785	1.99206	1	0.965338	99.9231
GOTERM_BP_FAT	GO:0031341~regulation of cell killing	4	0.149981	0.324618	P2RX7, CRTAM, PVRL2, NOS2	1260	14	8785	1.99206	1	0.965338	99.9231
GOTERM_BP_FAT	GO:0002703~regulation of leukocyte mediated immunity	7	0.262467	0.386663	FCER1A, P2RX7, CRTAM, ADORA3, C3, FCGR1A, PVRL2	1260	35	8785	1.39444	1	0.980746	99.9868
GOTERM_BP_FAT	GO:0002706~regulation of lymphocyte mediated immunity	6	0.224972	0.49279	FCER1A, P2RX7, CRTAM, C3, FCGR1A, PVRL2	1260	32	8785	1.30729	1	0.993481	99.9996
GOTERM_BP_FAT	GO:0001910~regulation of leukocyte mediated cytotoxicity	3	0.112486	0.530166	P2RX7, CRTAM, PVRL2	1260	12	8785	1.74306	1	0.995838	99.9999
GOTERM_BP_FAT	GO:0001912~positive regulation of leukocyte mediated cytotoxicity	3	0.112486	0.530166	P2RX7, CRTAM, PVRL2	1260	12	8785	1.74306	1	0.995838	99.9999
Annotation Cluster 98	Enrichment Score: 0.9603162969314355
Category	Term	Count	%	PValue	Genes	List Total	Pop Hits	Pop Total	Fold Enrichment	Bonferroni	Benjamini	FDR
GOTERM_BP_FAT	GO:0030278~regulation of ossification	11	0.412448	0.0113495	TWSG1, P2RX7, BCL2, CSF1, CD276, MGP, SMAD2, SMAD1, ANKH, ACVR1, APC	1260	32	8785	2.3967	1	0.296355	18.8216
GOTERM_BP_FAT	GO:0007369~gastrulation	9	0.337458	0.0658142	TWSG1, RNF2, GATA4, SMAD2, SMAD1, PRKACB, EXT1, LRP5, ACVR1	1260	31	8785	2.02419	1	0.668069	71.1685
GOTERM_BP_FAT	GO:0045667~regulation of osteoblast differentiation	6	0.224972	0.103485	TWSG1, CD276, SMAD2, SMAD1, ACVR1, APC	1260	18	8785	2.32407	1	0.770077	86.4072
GOTERM_BP_FAT	GO:0007498~mesoderm development	7	0.262467	0.203816	TWSG1, OSR1, SMAD2, SMAD1, PRKACB, EXT1, ACVR1	1260	28	8785	1.74306	1	0.904975	98.4452
GOTERM_BP_FAT	GO:0001707~mesoderm formation	5	0.187477	0.218689	TWSG1, SMAD2, SMAD1, PRKACB, ACVR1	1260	17	8785	2.05065	1	0.916331	98.8983
GOTERM_BP_FAT	GO:0048332~mesoderm morphogenesis	5	0.187477	0.218689	TWSG1, SMAD2, SMAD1, PRKACB, ACVR1	1260	17	8785	2.05065	1	0.916331	98.8983
GOTERM_BP_FAT	GO:0001704~formation of primary germ layer	5	0.187477	0.251605	TWSG1, SMAD2, SMAD1, PRKACB, ACVR1	1260	18	8785	1.93673	1	0.937641	99.4981
Annotation Cluster 99	Enrichment Score: 0.9598798379296709
Category	Term	Count	%	PValue	Genes	List Total	Pop Hits	Pop Total	Fold Enrichment	Bonferroni	Benjamini	FDR
GOTERM_BP_FAT	GO:0009890~negative regulation of biosynthetic process	41	1.53731	0.0108388	HMGB1, EIF2C2, CAV1, GCLC, SNX6, EDN1, PPARG, NOSTRIN, ITGB3, CBX5, KCNIP3, SORBS3, EIF4EBP1, APOE, TIA1, NR2F2, NR2F1, NR1H3, ATF7IP, SATB1, PAIP2, RXRA, PKIG, LMCD1, CD276, SMAD2, ADIPOQ, BRCA1, MXD4, CDKN1C, TSC1, ID1, RNF2, PRDM6, HOPX, DNMT1, ID3, RBPJ, APBB1, EIF2C3, IGFBP5	1260	195	8785	1.46595	1	0.289464	18.0521
GOTERM_BP_FAT	GO:0010605~negative regulation of macromolecule metabolic process	47	1.76228	0.0114261	HMGB1, EIF2C2, A2M, CAV1, GCLC, SNX6, DICER1, EDN1, SNCA, PPARG, NOSTRIN, ITGB3, TIMP3, CBX5, KCNIP3, SORBS3, EIF4EBP1, TIA1, PRKRA, NR2F2, NR2F1, NR1H3, ATF7IP, SATB1, PAIP2, RXRA, PKIG, LMCD1, CD276, CST3, UPK3B, SMAD2, ADIPOQ, MXD4, CDKN1C, TSC1, ID1, JUN, RNF2, PRDM6, HOPX, DNMT1, ID3, RBPJ, APBB1, EIF2C3, IGFBP5	1260	231	8785	1.41859	1	0.295811	18.9365
GOTERM_BP_FAT	GO:0010558~negative regulation of macromolecule biosynthetic process	38	1.42482	0.0219834	HMGB1, EIF2C2, GCLC, SNX6, EDN1, PPARG, NOSTRIN, ITGB3, CBX5, KCNIP3, SORBS3, EIF4EBP1, TIA1, NR2F2, NR2F1, NR1H3, ATF7IP, SATB1, PAIP2, RXRA, PKIG, LMCD1, CD276, SMAD2, ADIPOQ, MXD4, CDKN1C, TSC1, ID1, RNF2, PRDM6, HOPX, DNMT1, ID3, RBPJ, APBB1, EIF2C3, IGFBP5	1260	186	8785	1.42443	1	0.409993	33.3742
GOTERM_BP_FAT	GO:0031327~negative regulation of cellular biosynthetic process	38	1.42482	0.0276273	HMGB1, EIF2C2, CAV1, GCLC, SNX6, EDN1, PPARG, NOSTRIN, CBX5, KCNIP3, SORBS3, EIF4EBP1, TIA1, NR2F2, NR1H3, NR2F1, ATF7IP, SATB1, PAIP2, RXRA, PKIG, LMCD1, CD276, SMAD2, ADIPOQ, BRCA1, MXD4, CDKN1C, TSC1, ID1, RNF2, PRDM6, HOPX, DNMT1, ID3, RBPJ, EIF2C3, IGFBP5	1260	189	8785	1.40182	1	0.458732	40.0588
GOTERM_BP_FAT	GO:0010629~negative regulation of gene expression	31	1.16235	0.12928	HMGB1, EIF2C2, GCLC, SNX6, PPARG, DICER1, NOSTRIN, CBX5, KCNIP3, SORBS3, PRKRA, NR2F2, NR1H3, NR2F1, ATF7IP, SATB1, RXRA, PKIG, LMCD1, UPK3B, SMAD2, MXD4, CDKN1C, ID1, PRDM6, RNF2, HOPX, DNMT1, ID3, RBPJ, EIF2C3	1260	170	8785	1.27141	1	0.818806	92.0258
GOTERM_BP_FAT	GO:0000122~negative regulation of transcription from RNA polymerase II promoter	17	0.63742	0.186183	ATF7IP, SATB1, HMGB1, RXRA, PPARG, PKIG, LMCD1, SMAD2, KCNIP3, CDKN1C, SORBS3, ID1, RNF2, HOPX, ID3, NR2F2, NR2F1	1260	88	8785	1.34691	1	0.893817	97.68
GOTERM_BP_FAT	GO:0045892~negative regulation of transcription, DNA-dependent	21	0.787402	0.26659	ATF7IP, SATB1, HMGB1, RXRA, PPARG, PKIG, LMCD1, NOSTRIN, SMAD2, CBX5, KCNIP3, CDKN1C, SORBS3, ID1, RNF2, HOPX, DNMT1, ID3, RBPJ, NR2F2, NR2F1	1260	120	8785	1.22014	1	0.944291	99.6532
GOTERM_BP_FAT	GO:0051253~negative regulation of RNA metabolic process	21	0.787402	0.279434	ATF7IP, SATB1, HMGB1, RXRA, PPARG, PKIG, LMCD1, NOSTRIN, SMAD2, CBX5, KCNIP3, CDKN1C, SORBS3, ID1, RNF2, HOPX, DNMT1, ID3, RBPJ, NR2F2, NR2F1	1260	121	8785	1.21006	1	0.951162	99.7488
GOTERM_BP_FAT	GO:0051172~negative regulation of nitrogen compound metabolic process	28	1.04987	0.288872	HMGB1, CAV1, GCLC, SNX6, PPARG, EDN1, NOSTRIN, CBX5, KCNIP3, SORBS3, NR2F2, NR1H3, NR2F1, ATF7IP, SATB1, RXRA, PKIG, LMCD1, SMAD2, MXD4, CDKN1C, ID1, RNF2, PRDM6, HOPX, DNMT1, ID3, RBPJ	1260	168	8785	1.16204	1	0.953408	99.8026
GOTERM_BP_FAT	GO:0016481~negative regulation of transcription	26	0.974878	0.291921	HMGB1, GCLC, SNX6, PPARG, NOSTRIN, CBX5, KCNIP3, SORBS3, NR2F2, NR1H3, NR2F1, ATF7IP, SATB1, RXRA, PKIG, LMCD1, SMAD2, MXD4, CDKN1C, ID1, PRDM6, RNF2, HOPX, DNMT1, ID3, RBPJ	1260	155	8785	1.16953	1	0.95444	99.8175
GOTERM_BP_FAT	GO:0045934~negative regulation of nucleobase, nucleoside, nucleotide and nucleic acid metabolic process	27	1.01237	0.343072	HMGB1, GCLC, SNX6, PPARG, EDN1, NOSTRIN, CBX5, KCNIP3, SORBS3, NR2F2, NR1H3, NR2F1, ATF7IP, SATB1, RXRA, PKIG, LMCD1, SMAD2, MXD4, CDKN1C, ID1, RNF2, PRDM6, HOPX, DNMT1, ID3, RBPJ	1260	166	8785	1.13404	1	0.971416	99.9536
GOTERM_MF_FAT	GO:0016564~transcription repressor activity	11	0.412448	0.77657	CDKN1C, ATF7IP, SATB1, RNF2, PPARG, HOPX, LMCD1, DNMT1, NOSTRIN, CBX5, KCNIP3	1384	80	9249	0.918885	1	0.999627	100
Annotation Cluster 100	Enrichment Score: 0.9563547011282568
Category	Term	Count	%	PValue	Genes	List Total	Pop Hits	Pop Total	Fold Enrichment	Bonferroni	Benjamini	FDR
GOTERM_BP_FAT	GO:0050727~regulation of inflammatory response	12	0.449944	0.00199244	FCER1A, TNFRSF1A, GPX1, A2M, ADORA3, S100B, C3, AOAH, FCGR1A, CD276, LBP, ADA	1260	30	8785	2.78889	0.998905	0.0915482	3.5779
GOTERM_BP_FAT	GO:0031348~negative regulation of defense response	5	0.187477	0.157058	GPX1, A2M, AOAH, CD276, ADA	1260	15	8785	2.32407	1	0.860025	95.5899
GOTERM_BP_FAT	GO:0050728~negative regulation of inflammatory response	4	0.149981	0.282711	GPX1, AOAH, CD276, ADA	1260	13	8785	2.1453	1	0.952006	99.7689
GOTERM_BP_FAT	GO:0048585~negative regulation of response to stimulus	7	0.262467	0.332356	GPX1, GRB10, A2M, AOAH, COL3A1, CD276, ADA	1260	33	8785	1.47896	1	0.968323	99.9377
GOTERM_BP_FAT	GO:0032102~negative regulation of response to external stimulus	4	0.149981	0.562128	GPX1, AOAH, CD276, ADA	1260	20	8785	1.39444	1	0.997241	100
Annotation Cluster 101	Enrichment Score: 0.9447362402840096
Category	Term	Count	%	PValue	Genes	List Total	Pop Hits	Pop Total	Fold Enrichment	Bonferroni	Benjamini	FDR
INTERPRO	IPR003599:Immunoglobulin subtype	29	1.08736	0.0322839	IGFBP7, BCAM, LY9, ALCAM, FCGR1A, PVRL2, ESAM, TIE1, CSF1R, FCER1A, F11R, CRTAM, CD276, MXRA8, MCAM, SIRPA, IL11RA, THY1, A1BG, CD83, MMP23B, PECAM1, PDGFRB, VCAN, TREM1, TREM2, JAM2, VSIG4, JAM3	1514	120	9171	1.46389	1	0.768533	43.0477
SP_PIR_KEYWORDS	Immunoglobulin domain	21	0.787402	0.0876832	F11R, FGFR1, MPZL1, CRTAM, SCN1B, CD276, BCAM, MXRA8, MCAM, SIRPA, ALCAM, A1BG, MMP23B, FCGR1A, PECAM1, TEK, PVRL2, VCAN, TREM1, TIE1, CSF1R	1215	89	7349	1.42719	1	0.551649	73.3952
INTERPRO	IPR013151:Immunoglobulin	17	0.63742	0.103814	FCER1A, FGFR1, F11R, SCN1B, BCAM, MCAM, THY1, ALCAM, A1BG, FCGR1A, PECAM1, PVRL2, PDGFRB, TIE1, JAM2, JAM3, CSF1R	1514	70	9171	1.4711	1	0.963427	84.7452
SMART	SM00409:IG	29	1.08736	0.137245	IGFBP7, BCAM, LY9, ALCAM, FCGR1A, PVRL2, ESAM, TIE1, CSF1R, FCER1A, F11R, CRTAM, CD276, MXRA8, MCAM, SIRPA, IL11RA, THY1, A1BG, CD83, MMP23B, PECAM1, PDGFRB, VCAN, TREM1, TREM2, JAM2, VSIG4, JAM3	832	120	4364	1.26759	1	0.876479	86.6054
INTERPRO	IPR013106:Immunoglobulin V-set	19	0.712411	0.165984	F11R, MPZL1, CRTAM, CD276, MXRA8, MCAM, SIRPA, PDCD1, CD83, PECAM1, PVRL2, ESAM, VCAN, TREM1, VSIG4, JAM2, TREM2, JAM3, CSF1R	1514	86	9171	1.33828	1	0.990773	95.556
INTERPRO	IPR013783:Immunoglobulin-like fold	45	1.68729	0.166151	FGFR1, MPZL1, SCN1B, ADORA3, IGFBP7, F13A1, DSB, FCGRT, BCAM, PDCD1, ALCAM, TRIM3, UNC5B, SPEG, FCGR1A, PVRL2, TEK, TGM2, TGM3, ESAM, TIE1, CSF1R, FCER1A, F11R, CRTAM, CD276, MXRA8, MCAM, PALLD, SIRPA, FLNA, KDR, A1BG, BOLA-DQA1, PECAM1, PDGFRB, VCAN, SEMA4D, TREM1, RBPJ, TREM2, VSIG4, JAM2, JAM3, BOLA-DYB	1514	231	9171	1.18003	1	0.990244	95.5713
INTERPRO	IPR007110:Immunoglobulin-like	39	1.46232	0.219091	FGFR1, MPZL1, IGFBP7, DSB, FCGRT, BCAM, LY9, PDCD1, ALCAM, UNC5B, SPEG, FCGR1A, PVRL2, TEK, ROBO4, ESAM, CSF1R, FCER1A, F11R, CRTAM, CD276, MXRA8, MCAM, PALLD, SIRPA, IL11RA, THY1, A1BG, BOLA-DQA1, CD83, MMP23B, PECAM1, VCAN, SEMA4D, TREM1, TREM2, JAM2, JAM3, BOLA-DYB	1514	203	9171	1.16375	1	0.996216	98.5626
Annotation Cluster 102	Enrichment Score: 0.9402620618376303
Category	Term	Count	%	PValue	Genes	List Total	Pop Hits	Pop Total	Fold Enrichment	Bonferroni	Benjamini	FDR
SP_PIR_KEYWORDS	copper	9	0.337458	0.0527288	ABP1, PAM, F5, ATOX1, ALB, SPARC, LOXL1, S100A13, S100A12	1215	26	7349	2.09373	1	0.449564	54.2323
GOTERM_MF_FAT	GO:0005507~copper ion binding	10	0.374953	0.14913	ABP1, PAM, AHCY, F5, ATOX1, ALB, F8, SPARC, LOXL2, LOXL1	1384	41	9249	1.62995	1	0.848665	92.3599
UP_SEQ_FEATURE	metal ion-binding site:Copper	4	0.149981	0.192133	F5, ATOX1, ALB, LOXL1	873	10	5635	2.5819	1	0.999732	97.6187
Annotation Cluster 103	Enrichment Score: 0.9329430510686934
Category	Term	Count	%	PValue	Genes	List Total	Pop Hits	Pop Total	Fold Enrichment	Bonferroni	Benjamini	FDR
UP_SEQ_FEATURE	domain:PDZ	7	0.262467	0.0759107	PDLIM7, SNX27, PDLIM4, LIN7C, PDLIM2, MPP7, PDLIM1	873	20	5635	2.25916	1	0.991426	74.9166
INTERPRO	IPR001478:PDZ/DHR/GLGF	14	0.524934	0.0971684	PDLIM7, SNX27, PDLIM4, PDLIM2, LIN7C, MPP7, PDLIM1, TAX1BP3, SLC9A3R2, TJP1, USH1C, SDCBP, PARD6G, TJP2	1514	54	9171	1.57045	1	0.956442	82.684
SMART	SM00228:PDZ	14	0.524934	0.215448	PDLIM7, SNX27, PDLIM4, PDLIM2, LIN7C, MPP7, PDLIM1, TAX1BP3, SLC9A3R2, TJP1, USH1C, SDCBP, PARD6G, TJP2	832	54	4364	1.35986	1	0.92408	96.3274
Annotation Cluster 104	Enrichment Score: 0.9297704453271566
Category	Term	Count	%	PValue	Genes	List Total	Pop Hits	Pop Total	Fold Enrichment	Bonferroni	Benjamini	FDR
GOTERM_MF_FAT	GO:0018024~histone-lysine N-methyltransferase activity	6	0.224972	0.0460608	SETDB2, MLL, PRDM6, WHSC1, SETD2, SUV39H2	1384	14	9249	2.86406	1	0.605105	52.8073
GOTERM_MF_FAT	GO:0016278~lysine N-methyltransferase activity	6	0.224972	0.0460608	SETDB2, MLL, PRDM6, WHSC1, SETD2, SUV39H2	1384	14	9249	2.86406	1	0.605105	52.8073
GOTERM_MF_FAT	GO:0016279~protein-lysine N-methyltransferase activity	6	0.224972	0.0460608	SETDB2, MLL, PRDM6, WHSC1, SETD2, SUV39H2	1384	14	9249	2.86406	1	0.605105	52.8073
GOTERM_MF_FAT	GO:0042054~histone methyltransferase activity	6	0.224972	0.119126	SETDB2, MLL, PRDM6, WHSC1, SETD2, SUV39H2	1384	18	9249	2.2276	1	0.795613	86.7329
KEGG_PATHWAY	bta00310:Lysine degradation	9	0.337458	0.247657	SETDB2, PLOD1, PLOD2, SETD1B, ASH1L, SETD7, WHSC1, SETD2, SUV39H2	765	39	4940	1.4902	1	0.514998	96.9759
GOTERM_MF_FAT	GO:0008276~protein methyltransferase activity	6	0.224972	0.284164	SETDB2, MLL, PRDM6, WHSC1, SETD2, SUV39H2	1384	24	9249	1.6707	1	0.949666	99.5125
GOTERM_MF_FAT	GO:0008170~N-methyltransferase activity	6	0.224972	0.378607	SETDB2, MLL, PRDM6, WHSC1, SETD2, SUV39H2	1384	27	9249	1.48507	1	0.97777	99.9488
Annotation Cluster 105	Enrichment Score: 0.927301050431709
Category	Term	Count	%	PValue	Genes	List Total	Pop Hits	Pop Total	Fold Enrichment	Bonferroni	Benjamini	FDR
GOTERM_BP_FAT	GO:0006766~vitamin metabolic process	11	0.412448	0.0374184	GC, RBP4, GCLC, AKR1A1, RBP1, PYROXD2, VKORC1, QPRT, GULO, ALDH9A1, NAPRT1	1260	38	8785	2.01827	1	0.531327	50.1766
GOTERM_BP_FAT	GO:0006767~water-soluble vitamin metabolic process	7	0.262467	0.0836284	GCLC, AKR1A1, PYROXD2, QPRT, GULO, ALDH9A1, NAPRT1	1260	22	8785	2.21843	1	0.723809	79.7179
GOTERM_BP_FAT	GO:0042364~water-soluble vitamin biosynthetic process	5	0.187477	0.218689	AKR1A1, PYROXD2, QPRT, GULO, NAPRT1	1260	17	8785	2.05065	1	0.916331	98.8983
GOTERM_BP_FAT	GO:0009110~vitamin biosynthetic process	5	0.187477	0.28545	AKR1A1, PYROXD2, QPRT, GULO, NAPRT1	1260	19	8785	1.8348	1	0.952508	99.7845
Annotation Cluster 106	Enrichment Score: 0.9270521776470846
Category	Term	Count	%	PValue	Genes	List Total	Pop Hits	Pop Total	Fold Enrichment	Bonferroni	Benjamini	FDR
GOTERM_MF_FAT	GO:0016641~oxidoreductase activity, acting on the CH-NH2 group of donors, oxygen as acceptor	6	0.224972	0.0235398	ABP1, MAOA, MAOB, LOXL2, DDO, LOXL1	1384	12	9249	3.3414	1	0.453091	31.5691
GOTERM_MF_FAT	GO:0016638~oxidoreductase activity, acting on the CH-NH2 group of donors	6	0.224972	0.0336437	ABP1, MAOA, MAOB, LOXL2, DDO, LOXL1	1384	13	9249	3.08437	1	0.524373	42.0149
GOTERM_MF_FAT	GO:0008131~amine oxidase activity	3	0.112486	0.163884	ABP1, MAOA, MAOB	1384	5	9249	4.00968	1	0.870979	94.2174
KEGG_PATHWAY	bta00340:Histidine metabolism	6	0.224972	0.186058	ABP1, ASPA, MAOA, MAOB, UROC1, ALDH3B1	765	20	4940	1.93725	1	0.468364	92.0422
KEGG_PATHWAY	bta00380:Tryptophan metabolism	4	0.149981	0.959061	ABP1, MAOA, MAOB, CYP1A2	765	40	4940	0.645752	1	0.988251	100
Annotation Cluster 107	Enrichment Score: 0.9269619625098142
Category	Term	Count	%	PValue	Genes	List Total	Pop Hits	Pop Total	Fold Enrichment	Bonferroni	Benjamini	FDR
GOTERM_BP_FAT	GO:0060323~head morphogenesis	4	0.149981	0.0941887	PDGFRA, COL1A1, MMP2, PLEKHA1	1260	8	8785	3.48611	1	0.755575	83.5883
GOTERM_BP_FAT	GO:0060325~face morphogenesis	4	0.149981	0.0941887	PDGFRA, COL1A1, MMP2, PLEKHA1	1260	8	8785	3.48611	1	0.755575	83.5883
GOTERM_BP_FAT	GO:0060322~head development	4	0.149981	0.126759	PDGFRA, COL1A1, MMP2, PLEKHA1	1260	9	8785	3.09877	1	0.817913	91.5934
GOTERM_BP_FAT	GO:0060324~face development	4	0.149981	0.126759	PDGFRA, COL1A1, MMP2, PLEKHA1	1260	9	8785	3.09877	1	0.817913	91.5934
GOTERM_BP_FAT	GO:0010171~body morphogenesis	4	0.149981	0.162642	PDGFRA, COL1A1, MMP2, PLEKHA1	1260	10	8785	2.78889	1	0.867657	96.0941
Annotation Cluster 108	Enrichment Score: 0.9219538313645439
Category	Term	Count	%	PValue	Genes	List Total	Pop Hits	Pop Total	Fold Enrichment	Bonferroni	Benjamini	FDR
GOTERM_BP_FAT	GO:0060627~regulation of vesicle-mediated transport	11	0.412448	0.0440953	B4GALT1, FCER1A, CDH13, ADORA3, C3, FCGR1A, RAB4A, SNCA, SELE, ADIPOQ, SCAMP5	1260	39	8785	1.96652	1	0.571272	56.1258
GOTERM_BP_FAT	GO:0030100~regulation of endocytosis	7	0.262467	0.137532	CDH13, C3, FCGR1A, RAB4A, SNCA, SELE, ADIPOQ	1260	25	8785	1.95222	1	0.832536	93.2991
GOTERM_BP_FAT	GO:0045807~positive regulation of endocytosis	4	0.149981	0.282711	C3, FCGR1A, SNCA, SELE	1260	13	8785	2.1453	1	0.952006	99.7689
Annotation Cluster 109	Enrichment Score: 0.9163203542716837
Category	Term	Count	%	PValue	Genes	List Total	Pop Hits	Pop Total	Fold Enrichment	Bonferroni	Benjamini	FDR
GOTERM_BP_FAT	GO:0005996~monosaccharide metabolic process	26	0.974878	0.0457777	RBP4, ALDOB, NAGK, GALK1, PPP1R3C, PPP1R3B, AKR1A1, PIK3CA, MAN2B1, GPD2, B4GALT1, GMDS, PFKL, IGF2, BAD, PCK2, PPP1CB, ADIPOQ, PGM3, MAN2A1, RENBP, AMDHD2, PPP1R2, SDS, OTOG, GAA	1260	124	8785	1.46192	1	0.583224	57.5153
GOTERM_BP_FAT	GO:0019318~hexose metabolic process	22	0.824897	0.115785	B4GALT1, GPD2, RBP4, PFKL, GMDS, ALDOB, IGF2, BAD, PCK2, PPP1CB, ADIPOQ, PGM3, GALK1, MAN2A1, RENBP, PPP1R3C, PPP1R3B, PPP1R2, SDS, GAA, PIK3CA, MAN2B1	1260	112	8785	1.36954	1	0.800413	89.439
GOTERM_BP_FAT	GO:0006006~glucose metabolic process	16	0.599925	0.336304	GPD2, RBP4, PFKL, ALDOB, IGF2, BAD, PCK2, PPP1CB, ADIPOQ, PGM3, PPP1R3C, PPP1R2, PPP1R3B, SDS, GAA, PIK3CA	1260	92	8785	1.21256	1	0.969625	99.9441
Annotation Cluster 110	Enrichment Score: 0.9010965656882483
Category	Term	Count	%	PValue	Genes	List Total	Pop Hits	Pop Total	Fold Enrichment	Bonferroni	Benjamini	FDR
INTERPRO	IPR018247:EF-HAND 1	34	1.27484	0.00413548	S100A4, FKBP9, FKBP7, S100A8, S100A9, PRKCSH, KCNIP3, MYL9, SMOC2, RASGRP3, PVALB, MIER1, EHD2, SDF4, PLS3, CIB1, GPD2, HPCAL1, S100A16, SPARCL1, S100A11, SPARC, CAPN2, S100A14, S100A13, S100A12, EPS15, MTF1, S100B, PLCG1, BNIP2, NUCB2, FKBP10, RCN3	1514	127	9171	1.62168	0.999706	0.308972	6.8622
INTERPRO	IPR018249:EF-HAND 2	31	1.16235	0.0315105	S100A4, FKBP9, FKBP7, S100A8, S100A9, FSTL1, PRKCSH, KCNIP3, MYL9, SMOC2, RASGRP3, RASGRP4, PVALB, EHD2, SDF4, PLS3, CIB1, GPD2, HPCAL1, S100A16, SPARCL1, S100A11, CAPN2, S100A12, EPS15, NAPEPLD, PLCG1, S100B, NUCB2, FKBP10, RCN3	1514	130	9171	1.44447	1	0.767972	42.2619
UP_SEQ_FEATURE	domain:EF-hand 1	19	0.712411	0.0487071	GPD2, S100A4, FKBP9, S100A16, HPCAL1, S100A8, S100A9, FSTL1, CAPN2, PRKCSH, S100A14, S100A13, S100A12, S100B, PVALB, FKBP10, RCN3, SDF4, CIB1	873	78	5635	1.57231	1	0.974486	58.3021
UP_SEQ_FEATURE	domain:EF-hand 2	18	0.674916	0.0853494	GPD2, S100A4, FKBP9, S100A16, HPCAL1, S100A8, S100A9, FSTL1, CAPN2, PRKCSH, KCNIP3, S100A12, S100B, PVALB, FKBP10, RCN3, SDF4, CIB1	873	78	5635	1.48956	1	0.991493	79.0454
INTERPRO	IPR011992:EF-Hand type	29	1.08736	0.120861	FKBP9, S100A8, S100A9, KCNIP3, MYL9, SMOC2, STAT4, RASGRP3, PVALB, SDF4, EHD2, PLS3, CIB1, HPCAL1, S100A16, SPARCL1, S100A11, S100A10, SPARC, CAPN2, STAT1, S100A14, S100A13, S100A12, EPS15, NAPEPLD, S100B, NUCB2, FKBP10, RCN3	1514	136	9171	1.29167	1	0.97296	89.0271
INTERPRO	IPR002048:Calcium-binding EF-hand	19	0.712411	0.265971	GPD2, FKBP9, HPCAL1, FKBP7, FSTL1, CAPN2, MYL9, KCNIP3, EPS15, SMOC2, NAPEPLD, RASGRP3, PVALB, NUCB2, FKBP10, RCN3, SDF4, PLS3, CIB1	1514	93	9171	1.23755	1	0.998426	99.503
UP_SEQ_FEATURE	calcium-binding region:2	10	0.374953	0.343638	FKBP9, HPCAL1, PVALB, FKBP10, RCN3, CAPN2, SDF4, S100A13, CIB1, KCNIP3	873	49	5635	1.3173	1	0.999994	99.9374
UP_SEQ_FEATURE	calcium-binding region:1	10	0.374953	0.507574	FKBP9, HPCAL1, PVALB, FKBP10, CAPN2, PRKCSH, SDF4, S100A13, CIB1, KCNIP3	873	56	5635	1.15263	1	1	99.9996
SMART	SM00054:EFh	19	0.712411	0.511669	GPD2, FKBP9, HPCAL1, FKBP7, FSTL1, CAPN2, MYL9, KCNIP3, EPS15, SMOC2, NAPEPLD, RASGRP3, PVALB, NUCB2, FKBP10, RCN3, SDF4, PLS3, CIB1	832	93	4364	1.0716	1	0.993762	99.9942
INTERPRO	IPR018248:EF hand	14	0.524934	0.627405	GPD2, FKBP9, HPCAL1, S100A8, S100A11, MYL9, S100A12, KCNIP3, S100B, RASGRP3, PVALB, SDF4, PLS3, CIB1	1514	83	9171	1.02174	1	0.999998	100
Annotation Cluster 111	Enrichment Score: 0.8976315563815522
Category	Term	Count	%	PValue	Genes	List Total	Pop Hits	Pop Total	Fold Enrichment	Bonferroni	Benjamini	FDR
GOTERM_BP_FAT	GO:0050818~regulation of coagulation	8	0.299963	0.029304	CAV1, APOE, F2, VKORC1, TLR4, ANXA5, ANXA2, F2R	1260	22	8785	2.53535	1	0.470256	41.9191
GOTERM_BP_FAT	GO:0030193~regulation of blood coagulation	6	0.224972	0.0842407	CAV1, APOE, F2, TLR4, ANXA2, F2R	1260	17	8785	2.46078	1	0.724989	79.964
GOTERM_BP_FAT	GO:0050819~negative regulation of coagulation	4	0.149981	0.241326	APOE, F2, ANXA5, ANXA2	1260	12	8785	2.32407	1	0.93312	99.3561
GOTERM_BP_FAT	GO:0030195~negative regulation of blood coagulation	3	0.112486	0.430944	APOE, F2, ANXA2	1260	10	8785	2.09167	1	0.987091	99.9966
Annotation Cluster 112	Enrichment Score: 0.8956606477790933
Category	Term	Count	%	PValue	Genes	List Total	Pop Hits	Pop Total	Fold Enrichment	Bonferroni	Benjamini	FDR
SP_PIR_KEYWORDS	glycosidase	10	0.374953	0.0477981	HYAL2, HEXA, NAGA, SMPD1, GAA, NEU1, MAN2B1, NEU3, GBA, GLB1	1215	30	7349	2.01619	1	0.438693	50.6724
KEGG_PATHWAY	bta00511:Other glycan degradation	6	0.224972	0.0876054	HEXA, NEU1, MAN2B1, NEU3, GBA, GLB1	765	16	4940	2.42157	1	0.321968	67.6059
KEGG_PATHWAY	bta00600:Sphingolipid metabolism	7	0.262467	0.490994	SPHK1, SMPD1, ARSA, NEU1, NEU3, GBA, GLB1	765	36	4940	1.25563	1	0.748833	99.9752
Annotation Cluster 113	Enrichment Score: 0.8956385562727505
Category	Term	Count	%	PValue	Genes	List Total	Pop Hits	Pop Total	Fold Enrichment	Bonferroni	Benjamini	FDR
GOTERM_BP_FAT	GO:0043331~response to dsRNA	7	0.262467	0.00917172	EIF2C2, STAT4, CARD9, KCNJ8, PRKRA, DICER1, TLR3, STAT1	1260	14	8785	3.48611	1	0.26127	15.492
UP_SEQ_FEATURE	domain:PAZ	3	0.112486	0.0643805	EIF2C2, DICER1, EIF2C3	873	3	5635	6.45475	1	0.983709	68.8309
INTERPRO	IPR003100:Argonaute and Dicer protein, PAZ	3	0.112486	0.0726412	EIF2C2, DICER1, EIF2C3	1514	3	9171	6.05746	1	0.922004	72.575
GOTERM_BP_FAT	GO:0035194~posttranscriptional gene silencing by RNA	4	0.149981	0.162642	EIF2C2, PRKRA, DICER1, EIF2C3	1260	10	8785	2.78889	1	0.867657	96.0941
GOTERM_BP_FAT	GO:0016441~posttranscriptional gene silencing	4	0.149981	0.162642	EIF2C2, PRKRA, DICER1, EIF2C3	1260	10	8785	2.78889	1	0.867657	96.0941
GOTERM_BP_FAT	GO:0040029~regulation of gene expression, epigenetic	8	0.299963	0.164631	GPX1, EIF2C2, PRKRA, DICER1, EED, DNMT1, BRCA1, EIF2C3	1260	32	8785	1.74306	1	0.869435	96.2602
SP_PIR_KEYWORDS	rna-mediated gene silencing	4	0.149981	0.174709	EIF2C2, PRKRA, DICER1, EIF2C3	1215	9	7349	2.68825	1	0.708386	93.7373
GOTERM_BP_FAT	GO:0031047~gene silencing by RNA	4	0.149981	0.201076	EIF2C2, PRKRA, DICER1, EIF2C3	1260	11	8785	2.53535	1	0.904296	98.3444
GOTERM_BP_FAT	GO:0031050~dsRNA fragmentation	3	0.112486	0.207878	EIF2C2, PRKRA, DICER1	1260	6	8785	3.48611	1	0.908551	98.5838
GOTERM_BP_FAT	GO:0035195~gene silencing by miRNA	3	0.112486	0.264756	EIF2C2, DICER1, EIF2C3	1260	7	8785	2.9881	1	0.94431	99.637
GOTERM_BP_FAT	GO:0016458~gene silencing	5	0.187477	0.389297	EIF2C2, PRKRA, DICER1, DNMT1, EIF2C3	1260	22	8785	1.5846	1	0.980875	99.9878
Annotation Cluster 114	Enrichment Score: 0.874447450529026
Category	Term	Count	%	PValue	Genes	List Total	Pop Hits	Pop Total	Fold Enrichment	Bonferroni	Benjamini	FDR
SP_PIR_KEYWORDS	Aminopeptidase	6	0.224972	0.0493152	NPEPL1, METAP1, METAP2, RNPEPL1, ERAP2, ANPEP	1215	13	7349	2.79164	1	0.434354	51.7942
GOTERM_MF_FAT	GO:0004177~aminopeptidase activity	6	0.224972	0.0608507	NPEPL1, METAP1, METAP2, RNPEPL1, ERAP2, ANPEP	1384	15	9249	2.67312	1	0.677671	63.2033
INTERPRO	IPR001930:Peptidase M1, membrane alanine aminopeptidase	3	0.112486	0.325448	RNPEPL1, ERAP2, ANPEP	1514	7	9171	2.59606	1	0.999362	99.8834
INTERPRO	IPR014782:Peptidase M1, membrane alanine aminopeptidase, N-terminal	3	0.112486	0.325448	RNPEPL1, ERAP2, ANPEP	1514	7	9171	2.59606	1	0.999362	99.8834
Annotation Cluster 115	Enrichment Score: 0.8721931357755769
Category	Term	Count	%	PValue	Genes	List Total	Pop Hits	Pop Total	Fold Enrichment	Bonferroni	Benjamini	FDR
GOTERM_BP_FAT	GO:0000281~cytokinesis after mitosis	3	0.112486	0.100908	NUSAP1, APC, MYH10	1260	4	8785	5.22917	1	0.770523	85.6754
GOTERM_BP_FAT	GO:0033205~cytokinesis during cell cycle	3	0.112486	0.152558	NUSAP1, APC, MYH10	1260	5	8785	4.18333	1	0.855957	95.1394
GOTERM_BP_FAT	GO:0000910~cytokinesis	5	0.187477	0.157058	ROCK2, NUSAP1, APC, MYH10, DSTN	1260	15	8785	2.32407	1	0.860025	95.5899
Annotation Cluster 116	Enrichment Score: 0.871121609773068
Category	Term	Count	%	PValue	Genes	List Total	Pop Hits	Pop Total	Fold Enrichment	Bonferroni	Benjamini	FDR
GOTERM_BP_FAT	GO:0007243~protein kinase cascade	23	0.862392	0.0243278	FCER1A, CAV1, EFNA1, TGFBR1, EDN1, STK17B, SMAD1, OXSR1, TAB1, STK4, AVPI1, RPS6KA6, P2RX7, MAPK13, GADD45G, PIK3CA, TXK, TRIP6, INSR, SIK2, IRAK1BP1, F2R, SCG2	1260	100	8785	1.60361	1	0.429479	36.2323
GOTERM_BP_FAT	GO:0043085~positive regulation of catalytic activity	30	1.12486	0.0501573	GNA15, CAV1, EFNA1, CSF1, EDN1, ALDOB, PTH1R, AGTR1, APOA1, APOE, NMUR2, BCL2, RGN, NOS3, CALCRL, INSR, FCER1A, TGFBR1, SPHK1, SMAD2, TAB1, AVPI1, THY1, P2RX7, TSC1, GADD45G, LRP8, SELE, VLDLR, F2R	1260	149	8785	1.4038	1	0.59801	60.9398
GOTERM_BP_FAT	GO:0051338~regulation of transferase activity	25	0.937383	0.0582734	CAV1, EFNA1, HMGCR, CSF1, EDN1, TNFRSF4, TRIB2, APOA1, APOE, INSR, APC, FCER1A, TNXB, TGFBR1, SPHK1, PKIG, TAB1, AVPI1, THY1, CDKN1C, P2RX7, TSC1, GADD45G, LRP8, VLDLR	1260	121	8785	1.44054	1	0.637934	66.6073
GOTERM_BP_FAT	GO:0045859~regulation of protein kinase activity	23	0.862392	0.0680816	FCER1A, CAV1, TNXB, EFNA1, HMGCR, TGFBR1, CSF1, PKIG, SPHK1, EDN1, TAB1, TNFRSF4, AVPI1, TRIB2, THY1, P2RX7, TSC1, APOE, GADD45G, LRP8, INSR, VLDLR, APC	1260	111	8785	1.44469	1	0.674029	72.4205
GOTERM_BP_FAT	GO:0043549~regulation of kinase activity	24	0.899888	0.0682083	FCER1A, CAV1, TNXB, EFNA1, HMGCR, TGFBR1, CSF1, EDN1, PKIG, SPHK1, TAB1, TNFRSF4, AVPI1, TRIB2, THY1, CDKN1C, P2RX7, TSC1, APOE, GADD45G, LRP8, INSR, VLDLR, APC	1260	117	8785	1.4302	1	0.671348	72.4889
GOTERM_BP_FAT	GO:0042325~regulation of phosphorylation	33	1.23735	0.0789853	CAV1, PDGFB, HMGCR, EFNA1, CSF1, EDN1, TNFRSF4, TRIB2, APOA1, APOE, BCL2, RAPGEF3, INSR, APC, FCER1A, TNXB, TGFBR1, SPHK1, PKIG, IGF1, TAB1, AVPI1, THY1, CDKN1C, P2RX7, TSC1, JUN, PRKAR1B, GADD45G, F2, PDGFRB, LRP8, VLDLR	1260	174	8785	1.32232	1	0.713471	77.7561
GOTERM_BP_FAT	GO:0019220~regulation of phosphate metabolic process	34	1.27484	0.0879389	CAV1, PDGFB, HMGCR, EFNA1, CSF1, EDN1, TNFRSF4, TRIB2, APOA1, APOE, BCL2, RAPGEF3, INSR, APC, FCER1A, TNXB, TGFBR1, SPHK1, PKIG, IGF1, TAB1, AVPI1, THY1, CDKN1C, P2RX7, PPP1R2, TSC1, JUN, PRKAR1B, GADD45G, F2, PDGFRB, LRP8, VLDLR	1260	182	8785	1.3025	1	0.737843	81.3917
GOTERM_BP_FAT	GO:0051174~regulation of phosphorus metabolic process	34	1.27484	0.0879389	CAV1, PDGFB, HMGCR, EFNA1, CSF1, EDN1, TNFRSF4, TRIB2, APOA1, APOE, BCL2, RAPGEF3, INSR, APC, FCER1A, TNXB, TGFBR1, SPHK1, PKIG, IGF1, TAB1, AVPI1, THY1, CDKN1C, P2RX7, PPP1R2, TSC1, JUN, PRKAR1B, GADD45G, F2, PDGFRB, LRP8, VLDLR	1260	182	8785	1.3025	1	0.737843	81.3917
GOTERM_BP_FAT	GO:0044093~positive regulation of molecular function	32	1.19985	0.1139	GNA15, CAV1, EFNA1, CSF1, ALDOB, PTH1R, EDN1, TLR3, AGTR1, APOA1, APOE, NMUR2, BCL2, RGN, NOS3, CALCRL, INSR, FCER1A, TGFBR1, SPHK1, SMAD2, TAB1, AVPI1, THY1, P2RX7, TSC1, GADD45G, PON1, LRP8, SELE, VLDLR, F2R	1260	174	8785	1.28225	1	0.797263	89.0201
GOTERM_BP_FAT	GO:0043405~regulation of MAP kinase activity	11	0.412448	0.140287	FCER1A, P2RX7, CAV1, TNXB, APOE, EFNA1, HMGCR, EDN1, INSR, AVPI1, TRIB2	1260	48	8785	1.5978	1	0.836806	93.6795
GOTERM_BP_FAT	GO:0000165~MAPKKK cascade	11	0.412448	0.220731	FCER1A, P2RX7, CAV1, EFNA1, TGFBR1, GADD45G, SMAD1, TAB1, INSR, AVPI1, SCG2	1260	53	8785	1.44706	1	0.917299	98.9497
GOTERM_BP_FAT	GO:0045860~positive regulation of protein kinase activity	13	0.487439	0.262675	FCER1A, EFNA1, CSF1, TGFBR1, SPHK1, EDN1, TAB1, AVPI1, P2RX7, GADD45G, LRP8, INSR, VLDLR	1260	68	8785	1.33292	1	0.943261	99.6177
GOTERM_BP_FAT	GO:0051347~positive regulation of transferase activity	14	0.524934	0.27252	FCER1A, EFNA1, CSF1, TGFBR1, SPHK1, EDN1, TAB1, AVPI1, P2RX7, APOA1, GADD45G, LRP8, INSR, VLDLR	1260	75	8785	1.30148	1	0.947511	99.701
GOTERM_BP_FAT	GO:0033674~positive regulation of kinase activity	13	0.487439	0.314926	FCER1A, EFNA1, CSF1, TGFBR1, SPHK1, EDN1, TAB1, AVPI1, P2RX7, GADD45G, LRP8, INSR, VLDLR	1260	71	8785	1.2766	1	0.96304	99.9002
GOTERM_BP_FAT	GO:0000187~activation of MAPK activity	5	0.187477	0.423721	FCER1A, P2RX7, EFNA1, INSR, AVPI1	1260	23	8785	1.5157	1	0.986446	99.9958
GOTERM_BP_FAT	GO:0032147~activation of protein kinase activity	6	0.224972	0.46353	TGFBR1, GADD45G, SPHK1, EDN1, TAB1, INSR	1260	31	8785	1.34946	1	0.990988	99.9989
GOTERM_BP_FAT	GO:0043406~positive regulation of MAP kinase activity	6	0.224972	0.49279	FCER1A, P2RX7, EFNA1, EDN1, INSR, AVPI1	1260	32	8785	1.30729	1	0.993481	99.9996
Annotation Cluster 117	Enrichment Score: 0.8643302313365734
Category	Term	Count	%	PValue	Genes	List Total	Pop Hits	Pop Total	Fold Enrichment	Bonferroni	Benjamini	FDR
GOTERM_BP_FAT	GO:0032370~positive regulation of lipid transport	4	0.149981	0.0419191	P2RX7, APOE, PON1, ADIPOQ	1260	6	8785	4.64815	1	0.56058	54.2649
GOTERM_BP_FAT	GO:0032368~regulation of lipid transport	6	0.224972	0.0670685	P2RX7, APOA1, APOE, PON1, ITGB3, ADIPOQ	1260	16	8785	2.61458	1	0.671768	71.8676
GOTERM_BP_FAT	GO:0032376~positive regulation of cholesterol transport	3	0.112486	0.152558	APOE, PON1, ADIPOQ	1260	5	8785	4.18333	1	0.855957	95.1394
GOTERM_BP_FAT	GO:0010874~regulation of cholesterol efflux	3	0.112486	0.152558	APOE, PON1, ADIPOQ	1260	5	8785	4.18333	1	0.855957	95.1394
GOTERM_BP_FAT	GO:0032373~positive regulation of sterol transport	3	0.112486	0.152558	APOE, PON1, ADIPOQ	1260	5	8785	4.18333	1	0.855957	95.1394
GOTERM_BP_FAT	GO:0010875~positive regulation of cholesterol efflux	3	0.112486	0.152558	APOE, PON1, ADIPOQ	1260	5	8785	4.18333	1	0.855957	95.1394
GOTERM_BP_FAT	GO:0032374~regulation of cholesterol transport	4	0.149981	0.282711	APOA1, APOE, PON1, ADIPOQ	1260	13	8785	2.1453	1	0.952006	99.7689
GOTERM_BP_FAT	GO:0032371~regulation of sterol transport	4	0.149981	0.282711	APOA1, APOE, PON1, ADIPOQ	1260	13	8785	2.1453	1	0.952006	99.7689
Annotation Cluster 118	Enrichment Score: 0.852972046850095
Category	Term	Count	%	PValue	Genes	List Total	Pop Hits	Pop Total	Fold Enrichment	Bonferroni	Benjamini	FDR
GOTERM_MF_FAT	GO:0016671~oxidoreductase activity, acting on sulfur group of donors, disulfide as acceptor	4	0.149981	0.0731131	SEPX1, MSRA, ERO1LB, MSRB3	1384	7	9249	3.81874	1	0.705943	70.1521
GOTERM_MF_FAT	GO:0008113~peptide-methionine-(S)-S-oxide reductase activity	3	0.112486	0.108869	SEPX1, MSRA, MSRB3	1384	4	9249	5.0121	1	0.788264	84.0471
GOTERM_MF_FAT	GO:0016667~oxidoreductase activity, acting on sulfur group of donors	6	0.224972	0.346884	SEPX1, MSRA, ERO1LB, NXN, QSOX1, MSRB3	1384	26	9249	1.54219	1	0.970213	99.8868
Annotation Cluster 119	Enrichment Score: 0.852894416400645
Category	Term	Count	%	PValue	Genes	List Total	Pop Hits	Pop Total	Fold Enrichment	Bonferroni	Benjamini	FDR
INTERPRO	IPR000562:Type II fibronectin, collagen-binding	5	0.187477	0.0674411	LY75, MMP9, PLA2R1, MMP2, FN1	1514	10	9171	3.02873	1	0.913386	69.814
SMART	SM00059:FN2	5	0.187477	0.104372	LY75, MMP9, PLA2R1, MMP2, FN1	832	10	4364	2.6226	1	0.803972	77.7116
UP_SEQ_FEATURE	domain:Fibronectin type-II 2	3	0.112486	0.234669	MMP9, MMP2, FN1	873	6	5635	3.22738	1	0.999916	99.0768
UP_SEQ_FEATURE	domain:Fibronectin type-II 1	3	0.112486	0.234669	MMP9, MMP2, FN1	873	6	5635	3.22738	1	0.999916	99.0768
Annotation Cluster 120	Enrichment Score: 0.8438648625872609
Category	Term	Count	%	PValue	Genes	List Total	Pop Hits	Pop Total	Fold Enrichment	Bonferroni	Benjamini	FDR
GOTERM_MF_FAT	GO:0003677~DNA binding	174	6.52418	0.0569496	RAD51C, ARNT2, BBX, FOXO3, PNN, TOP1, APP, MIER1, FOXF1, MIER3, GATA4, ZNF445, LUC7L3, SATB1, POU2AF1, POLH, ROCK2, RXRA, RCOR1, MTA3, ZHX1, GTF2IRD2, NEIL1, RMI2, ARID1A, H2AFJ, LIG4, ESCO2, MTF1, ABT1, JUN, SMARCA5, ZZZ3, NFE2L3, MYNN, HMGB1, TSHZ2, HMGB3, BLM, AHCTF1, NOSTRIN, SOX7, ELK3, OBFC2A, LMAN1, NR2C2, ATF2, MEIS3, MEIS2, HOXA5, ALB, ELK4, TFDP2, STRBP, ERCC6L, NR1H3, IKZF5, TAF1, IKZF…	1384	1038	9249	1.12024	1	0.665303	60.6923
GOTERM_MF_FAT	GO:0043565~sequence-specific DNA binding	57	2.13723	0.0989596	ELF1, BACH2, PPARG, PAX6, FOXO3, FOS, HLX, FOXF1, GATA4, HSF4, NR2F2, NR2F1, SATB1, RXRA, MTA3, ZHX1, FOXJ3, FOSB, JUN, NFE2L3, IRX3, TSHZ2, NFYB, ELK3, NR3C1, NR2C2, MEIS3, MEIS2, NR1D1, HOXA5, ELK4, POU2F1, POU3F1, ETV3, NR1H3, CEBPA, ERG, NFE2, EPAS1, MAFB, CREB1, HMBOX1, NR4A1, SMAD2, HOXB3, ADNP2, HOXB2, MEOX2, DBP, ETS1, MEOX1, TRPS1, ETS2, HOPX, NR5A2, KLF4, RERE	1384	317	9249	1.20164	1	0.763055	80.9752
GOTERM_MF_FAT	GO:0003700~transcription factor activity	79	2.96213	0.102723	ELF1, BACH2, PPARG, ARNT2, PAX6, FOXO3, FOS, ZNF148, HLX, FOXF1, GATA4, SOX18, HSF4, ZNF445, MYB, NR2F2, NR2F1, SATB1, ROCK2, ZNF287, RXRA, MTA3, ZHX1, FOXJ3, FOSB, MTF1, JUN, NFE2L3, IRX3, TSHZ2, NR3C1, ELK3, NR2C2, TSC22D1, STAT4, MEIS3, TSC22D3, MEIS2, NR1D1, REL, HOXA5, ELK4, ZSCAN20, POU2F1, TFDP2, NFAT5, NFATC4, POU3F1, ETV3, NR1H3, CEBPA, ERG, NFE2, EPAS1, MAFB, CREB1, HMBOX1, NR4A1, SMAD2…	1384	455	9249	1.16031	1	0.772036	82.2021
GOTERM_MF_FAT	GO:0030528~transcription regulator activity	118	4.42445	0.147497	ARNT2, PDLIM1, FOXO3, CBX5, SMARCD3, FOXF1, GATA4, ATOH8, ZNF445, SATB1, ROCK2, RXRA, MTA3, ZHX1, MED13, ELL3, MTF1, ABT1, JUN, SMARCA5, TGFB1I1, NFE2L3, TSHZ2, NOSTRIN, MYBL1, ELK3, NR2C2, MEIS3, MEIS2, HOXA5, ELK4, TFDP2, TCF3, NR1H3, NFE2, EPAS1, MAFB, LMCD1, NR4A1, SMAD2, KLF15, SMAD1, MED13L, TAX1BP3, HOXB3, CDKN1C, HOXB2, ETS1, RNF2, TRPS1, ETS2, EBF1, HOPX, DNMT1, RBPJ, RERE, KLF4, ELF1, B…	1384	715	9249	1.1029	1	0.851588	92.123
GOTERM_BP_FAT	GO:0045449~regulation of transcription	178	6.67417	0.197343	EIF2C2, ARNT2, TLR3, PDLIM1, FOXO3, PNN, CBX5, CDCA7, SMARCD3, FOXF1, GATA4, EED, YEATS2, ZNF445, ATOH8, INSR, SATB1, POU2AF1, ROCK2, RXRA, PKIG, MTA3, ZHX1, GTF2IRD2, MED13, ELL3, MTF1, ABT1, PRDM6, JUN, SMARCA5, ZZZ3, DNTTIP2, NFE2L3, MYNN, ZNF614, HMGB1, TSHZ2, GCLC, SNX6, NOSTRIN, ELK3, MYBL1, NR2C2, ZNF699, MEIS3, MEIS2, HOXA5, ELK4, TFDP2, TCF3, ASF1A, NR1H3, PLAGL2, IKZF5, TAF1, IKZF3, MLL…	1260	1166	8785	1.06437	1	0.903742	98.1973
GOTERM_BP_FAT	GO:0006355~regulation of transcription, DNA-dependent	129	4.8369	0.251309	ARNT2, FOXO3, CBX5, FOXF1, GATA4, YEATS2, ZNF445, INSR, SATB1, ROCK2, RXRA, PKIG, MTA3, ZHX1, MED13, ELL3, MTF1, JUN, SMARCA5, NFE2L3, ZNF614, HMGB1, TSHZ2, NOSTRIN, ELK3, NR2C2, ZNF699, MEIS3, MEIS2, HOXA5, ELK4, TFDP2, PLAGL2, NR1H3, TAF1, MLL, NFE2, EPAS1, MAFB, RFX7, LMCD1, NR4A1, SMAD2, KLF15, SMAD1, MED13L, ZNF627, HOXB3, CDKN1C, HOXB2, ETS1, RNF2, TRPS1, ETS2, EBF1, HOPX, DNMT1, RBPJ, KLF4…	1260	845	8785	1.0644	1	0.93789	99.4945
GOTERM_BP_FAT	GO:0051252~regulation of RNA metabolic process	130	4.87439	0.292493	ARNT2, FOXO3, CBX5, FOXF1, GATA4, YEATS2, ZNF445, INSR, SATB1, ROCK2, RXRA, PKIG, MTA3, ZHX1, MED13, ELL3, MTF1, JUN, SMARCA5, NFE2L3, ZNF614, HMGB1, TSHZ2, NOSTRIN, ELK3, NR2C2, ZNF699, MEIS3, MEIS2, HOXA5, ELK4, TFDP2, PLAGL2, NR1H3, TAF1, MLL, NFE2, EPAS1, MAFB, RFX7, LMCD1, NR4A1, SMAD2, KLF15, SMAD1, MED13L, ZNF627, HOXB3, CDKN1C, HOXB2, ETS1, RNF2, TRPS1, ETS2, EBF1, HOPX, DNMT1, RBPJ, KLF4…	1260	860	8785	1.05394	1	0.954401	99.8202
Annotation Cluster 121	Enrichment Score: 0.8405333592482946
Category	Term	Count	%	PValue	Genes	List Total	Pop Hits	Pop Total	Fold Enrichment	Bonferroni	Benjamini	FDR
GOTERM_BP_FAT	GO:0009725~response to hormone stimulus	13	0.487439	0.0683881	RBP4, CAV1, GCLC, SOCS2, PPARG, SLC2A8, EIF4EBP1, TSC1, BCL2, FAS, STEAP2, INSR, PIK3R1	1260	53	8785	1.71017	1	0.670664	72.5857
GOTERM_BP_FAT	GO:0043434~response to peptide hormone stimulus	8	0.299963	0.0951683	SLC2A8, RBP4, EIF4EBP1, TSC1, SOCS2, PPARG, INSR, PIK3R1	1260	28	8785	1.99206	1	0.757886	83.9095
GOTERM_BP_FAT	GO:0009719~response to endogenous stimulus	14	0.524934	0.0982649	RBP4, CAV1, GCLC, SOCS2, PPARG, SLC2A8, CDH13, EIF4EBP1, TSC1, BCL2, FAS, STEAP2, INSR, PIK3R1	1260	62	8785	1.57437	1	0.767974	84.8863
GOTERM_BP_FAT	GO:0032868~response to insulin stimulus	7	0.262467	0.10006	SLC2A8, RBP4, EIF4EBP1, TSC1, PPARG, INSR, PIK3R1	1260	23	8785	2.12198	1	0.771644	85.4267
GOTERM_BP_FAT	GO:0008286~insulin receptor signaling pathway	4	0.149981	0.201076	SLC2A8, EIF4EBP1, INSR, PIK3R1	1260	11	8785	2.53535	1	0.904296	98.3444
GOTERM_BP_FAT	GO:0032869~cellular response to insulin stimulus	5	0.187477	0.251605	SLC2A8, EIF4EBP1, PPARG, INSR, PIK3R1	1260	18	8785	1.93673	1	0.937641	99.4981
GOTERM_BP_FAT	GO:0032870~cellular response to hormone stimulus	6	0.224972	0.403696	SLC2A8, EIF4EBP1, SOCS2, PPARG, INSR, PIK3R1	1260	29	8785	1.44253	1	0.983742	99.9921
Annotation Cluster 122	Enrichment Score: 0.8392286989865353
Category	Term	Count	%	PValue	Genes	List Total	Pop Hits	Pop Total	Fold Enrichment	Bonferroni	Benjamini	FDR
GOTERM_BP_FAT	GO:0006527~arginine catabolic process	3	0.112486	0.0556986	NOS3, NOS2, FAH	1260	3	8785	6.97222	1	0.626317	64.8995
GOTERM_BP_FAT	GO:0046395~carboxylic acid catabolic process	14	0.524934	0.0797761	BCAT1, PDPR, ACOX1, AHCY, ADIPOQ, FAH, AKR1A1, SDS, PON1, NOS3, PEX13, UROC1, NOS2, IRG1	1260	60	8785	1.62685	1	0.7156	78.1024
GOTERM_BP_FAT	GO:0016054~organic acid catabolic process	14	0.524934	0.0797761	BCAT1, PDPR, ACOX1, AHCY, ADIPOQ, FAH, AKR1A1, SDS, PON1, NOS3, PEX13, UROC1, NOS2, IRG1	1260	60	8785	1.62685	1	0.7156	78.1024
GOTERM_BP_FAT	GO:0006525~arginine metabolic process	4	0.149981	0.0941887	ASS1, NOS3, NOS2, FAH	1260	8	8785	3.48611	1	0.755575	83.5883
GOTERM_BP_FAT	GO:0009065~glutamine family amino acid catabolic process	3	0.112486	0.321612	NOS3, NOS2, FAH	1260	8	8785	2.61458	1	0.964592	99.9166
GOTERM_BP_FAT	GO:0009063~cellular amino acid catabolic process	8	0.299963	0.346888	BCAT1, PDPR, AHCY, SDS, NOS3, UROC1, NOS2, FAH	1260	40	8785	1.39444	1	0.971565	99.9583
GOTERM_BP_FAT	GO:0009310~amine catabolic process	9	0.337458	0.358335	BCAT1, PDPR, AHCY, SDS, MAOA, NOS3, UROC1, NOS2, FAH	1260	47	8785	1.33511	1	0.974348	99.9698
Annotation Cluster 123	Enrichment Score: 0.838788049958239
Category	Term	Count	%	PValue	Genes	List Total	Pop Hits	Pop Total	Fold Enrichment	Bonferroni	Benjamini	FDR
GOTERM_BP_FAT	GO:0010522~regulation of calcium ion transport into cytosol	5	0.187477	0.0430321	P2RX4, P2RX7, BCL2, F2, THY1	1260	10	8785	3.48611	1	0.566227	55.2258
GOTERM_BP_FAT	GO:0010524~positive regulation of calcium ion transport into cytosol	4	0.149981	0.0656815	P2RX4, P2RX7, F2, THY1	1260	7	8785	3.98413	1	0.669044	71.0936
GOTERM_BP_FAT	GO:0032846~positive regulation of homeostatic process	4	0.149981	0.0941887	P2RX4, P2RX7, F2, THY1	1260	8	8785	3.48611	1	0.755575	83.5883
GOTERM_BP_FAT	GO:0034405~response to fluid shear stress	3	0.112486	0.100908	P2RX4, P2RX7, NOS3	1260	4	8785	5.22917	1	0.770523	85.6754
GOTERM_BP_FAT	GO:0051928~positive regulation of calcium ion transport	4	0.149981	0.162642	P2RX4, P2RX7, F2, THY1	1260	10	8785	2.78889	1	0.867657	96.0941
GOTERM_BP_FAT	GO:0032844~regulation of homeostatic process	9	0.337458	0.16814	P2RX4, P2RX7, GCLC, BCL2, F2, FOXO3, ADA, THY1, F2R	1260	38	8785	1.65132	1	0.87465	96.537
GOTERM_BP_FAT	GO:0051924~regulation of calcium ion transport	6	0.224972	0.172358	P2RX4, P2RX7, BCL2, F2, NOS3, THY1	1260	21	8785	1.99206	1	0.879133	96.8441
GOTERM_BP_FAT	GO:0043270~positive regulation of ion transport	4	0.149981	0.282711	P2RX4, P2RX7, F2, THY1	1260	13	8785	2.1453	1	0.952006	99.7689
GOTERM_BP_FAT	GO:0010959~regulation of metal ion transport	6	0.224972	0.283288	P2RX4, P2RX7, BCL2, F2, NOS3, THY1	1260	25	8785	1.67333	1	0.95158	99.7723
GOTERM_BP_FAT	GO:0043269~regulation of ion transport	6	0.224972	0.403696	P2RX4, P2RX7, BCL2, F2, NOS3, THY1	1260	29	8785	1.44253	1	0.983742	99.9921
Annotation Cluster 124	Enrichment Score: 0.8332323951144487
Category	Term	Count	%	PValue	Genes	List Total	Pop Hits	Pop Total	Fold Enrichment	Bonferroni	Benjamini	FDR
UP_SEQ_FEATURE	domain:NTR	6	0.224972	0.0112131	C4A, SFRP1, C3, TIMP2, TIMP3, TIMP1	873	10	5635	3.87285	1	0.829223	17.9251
UP_SEQ_FEATURE	metal ion-binding site:Zinc; via amide nitrogen and carbonyl oxygen; shared with metalloproteinase partner	3	0.112486	0.115692	TIMP2, TIMP3, TIMP1	873	4	5635	4.84107	1	0.99572	88.3958
UP_SEQ_FEATURE	region of interest:Involved in metalloproteinase-binding	3	0.112486	0.115692	TIMP2, TIMP3, TIMP1	873	4	5635	4.84107	1	0.99572	88.3958
INTERPRO	IPR001820:Proteinase inhibitor I35, tissue inhibitor of metalloproteinase	3	0.112486	0.129566	TIMP2, TIMP3, TIMP1	1514	4	9171	4.5431	1	0.978389	90.7491
PIR_SUPERFAMILY	PIRSF001636:metalloproteinase inhibitor	3	0.112486	0.139669	TIMP2, TIMP3, TIMP1	671	4	3890	4.34799	1	0.999999	89.531
SMART	SM00206:NTR	3	0.112486	0.166195	TIMP2, TIMP3, TIMP1	832	4	4364	3.93389	1	0.881273	91.5847
SP_PIR_KEYWORDS	metalloenzyme inhibitor	3	0.112486	0.259645	TIMP2, TIMP3, TIMP1	1215	6	7349	3.02428	1	0.823072	98.6932
SP_PIR_KEYWORDS	metalloprotease inhibitor	3	0.112486	0.259645	TIMP2, TIMP3, TIMP1	1215	6	7349	3.02428	1	0.823072	98.6932
GOTERM_MF_FAT	GO:0008191~metalloendopeptidase inhibitor activity	3	0.112486	0.282086	TIMP2, TIMP3, TIMP1	1384	7	9249	2.86406	1	0.949625	99.4895
GOTERM_MF_FAT	GO:0010576~metalloenzyme regulator activity	3	0.112486	0.282086	TIMP2, TIMP3, TIMP1	1384	7	9249	2.86406	1	0.949625	99.4895
GOTERM_MF_FAT	GO:0048551~metalloenzyme inhibitor activity	3	0.112486	0.282086	TIMP2, TIMP3, TIMP1	1384	7	9249	2.86406	1	0.949625	99.4895
Annotation Cluster 125	Enrichment Score: 0.8188506184681804
Category	Term	Count	%	PValue	Genes	List Total	Pop Hits	Pop Total	Fold Enrichment	Bonferroni	Benjamini	FDR
GOTERM_BP_FAT	GO:0010565~regulation of cellular ketone metabolic process	5	0.187477	0.103375	CAV1, SNCA, NR3C1, ADIPOQ, BRCA1	1260	13	8785	2.68162	1	0.771032	86.3768
GOTERM_BP_FAT	GO:0019216~regulation of lipid metabolic process	9	0.337458	0.16814	AGTR1, CAV1, APOA1, APOE, SNCA, PNPLA2, NR3C1, ADIPOQ, BRCA1	1260	38	8785	1.65132	1	0.87465	96.537
GOTERM_BP_FAT	GO:0019217~regulation of fatty acid metabolic process	4	0.149981	0.201076	CAV1, SNCA, ADIPOQ, BRCA1	1260	11	8785	2.53535	1	0.904296	98.3444
Annotation Cluster 126	Enrichment Score: 0.8106540902228323
Category	Term	Count	%	PValue	Genes	List Total	Pop Hits	Pop Total	Fold Enrichment	Bonferroni	Benjamini	FDR
GOTERM_BP_FAT	GO:0048568~embryonic organ development	15	0.56243	0.0527451	RBP4, EPAS1, TGFBR1, EDN1, HSPG2, ADA, FZD6, HOXB3, PLK4, SP1, HOXA5, HLX, GATA4, PRKRA, MYB	1260	62	8785	1.68683	1	0.611303	62.8387
[truncated: 1,973 more rows]
