# Supplementary material for: Immunological Response to Single Pathogen Challenge with Agents of the Bovine Respiratory Disease Complex: An RNA-Sequence Analysis of the Bronchial Lymph Node Transcriptome
Source: PLoS One. 2015 Jun 29;10(6):e0131459. doi: 10.1371/journal.pone.0131459 (PMC4484807; doi:10.1371/journal.pone.0131459)
Supplement: S8 Table — Tabs are identified according to the type of DAVID analysis performed. (XLSX) [file pone.0131459.s008.xlsx]

## Sheet: DE_genes
gene_id	locus	sample_1	sample_2	value_1	value_2	log2(fold_change)	q_value	significant
LOC100847261	22:52148149-52149580	MANNHE	CTRL	70.0674	0.207933	-8.39648	0.0126481	yes
RBM44	3:117880749-117900879	MANNHE	CTRL	2.52445	0.0167663	-7.23426	0.0472439	yes
CATHL2	22:52189556-52191061	MANNHE	CTRL	20.9357	0.142048	-7.20345	0.01887	yes
LBP	13:67875397-67910095	MANNHE	CTRL	5.26449	0.057044	-6.52808	0.00351112	yes
AZU1	7:44968575-44971478	MANNHE	CTRL	4.33918	0.0955324	-5.50529	0.0292104	yes
BMPR1B	6:30798827-30850160	MANNHE	CTRL	1.6764	0.0430146	-5.2844	0.000721596	yes
PRG3	15:81921148-81926082	MANNHE	CTRL	4.12328	0.119342	-5.11062	0.00703581	yes
CD177	18:51877253-51888123	MANNHE	CTRL	2.23735	0.066397	-5.07453	0.00534264	yes
PGLYRP1	18:53946096-53948158	MANNHE	CTRL	21.0957	0.725059	-4.8627	0.000721596	yes
TGM3	13:53261631-53304213	MANNHE	CTRL	8.1921	0.372343	-4.45953	0.000721596	yes
LOC100300028	7:15689614-15704694	MANNHE	CTRL	266.797	14.9501	-4.15751	0.000721596	yes
LOC100336999	12:71321404-71535528	MANNHE	CTRL	8.52674	0.516294	-4.04573	0.000721596	yes
HP	18:39173136-39179293	MANNHE	CTRL	16.3309	1.02612	-3.99233	0.000721596	yes
LRG1	7:20812033-20814992	MANNHE	CTRL	3.14664	0.206095	-3.93244	0.000721596	yes
SFRP4	4:50009871-50020466	MANNHE	CTRL	9.17342	0.638628	-3.84441	0.000721596	yes
FCAR	18:62838471-62849020	MANNHE	CTRL	1.70837	0.119165	-3.84158	0.00786391	yes
IL8	6:90559881-90563647	MANNHE	CTRL	1.4895	0.105121	-3.82471	0.000721596	yes
FGF23	5:106208178-106216757	MANNHE	CTRL	3.94121	0.282292	-3.80338	0.00246199	yes
LOC100337129	12:73516166-73569768	MANNHE	CTRL	11.2633	0.890911	-3.6602	0.000721596	yes
CTHRC1	14:63311959-63328221	MANNHE	CTRL	1.93426	0.159239	-3.60251	0.000721596	yes
LOC100300806	7:15707337-15720295	MANNHE	CTRL	1137.62	94.9129	-3.58327	0.000721596	yes
S100A8	3:17146917-17147899	MANNHE	CTRL	74.1502	7.02741	-3.39938	0.000721596	yes
VCAN	7:85666057-85782896	MANNHE	CTRL	1.90437	0.187868	-3.34153	0.000721596	yes
KLHL31	23:6771145-6785244	MANNHE	CTRL	0.479447	0.0489642	-3.29157	0.00993052	yes
EMR3	7:12206054-12271137	MANNHE	CTRL	3.28298	0.336967	-3.28433	0.000721596	yes
CTSL1	8:82365268-82371041	MANNHE	CTRL	8.2208	0.849126	-3.27523	0.000721596	yes
S100A9	3:17176216-17178919	MANNHE	CTRL	59.912	6.286	-3.25263	0.000721596	yes
ELFN2	5:76173494-76175969	MANNHE	CTRL	11.7767	1.24883	-3.23728	0.000721596	yes
RETN	7:17737515-17738903	MANNHE	CTRL	31.1513	3.41427	-3.18965	0.000721596	yes
TF	1:136683310-136722309	MANNHE	CTRL	8.4027	0.923549	-3.18559	0.000721596	yes
ADAM28	8:72403267-72478190	MANNHE	CTRL	0.373272	0.0416083	-3.16528	0.00868468	yes
PTX3	1:110945677-111211551	MANNHE	CTRL	1.72638	0.197997	-3.1242	0.000721596	yes
MGAT3	5:111423285-111424950	MANNHE	CTRL	1.72091	0.200917	-3.0985	0.000721596	yes
MGAM	4:106123752-106206202	MANNHE	CTRL	0.74127	0.0874361	-3.0837	0.000721596	yes
IRG1	12:52421740-52424165	MANNHE	CTRL	10.7105	1.29372	-3.04943	0.000721596	yes
LOC100847808	22:5819023-5823764	MANNHE	CTRL	1.70028	0.216496	-2.97336	0.0237661	yes
TARM1	18:63479270-63487340	MANNHE	CTRL	1.74696	0.22305	-2.96941	0.00135308	yes
MRCL	18:1870811-1875884	MANNHE	CTRL	0.687177	0.088792	-2.95218	0.0141683	yes
SCG2	2:112549868-112555375	MANNHE	CTRL	1.51684	0.199606	-2.92584	0.000721596	yes
SFRP2	17:3829563-3838138	MANNHE	CTRL	24.8903	3.29282	-2.91819	0.000721596	yes
LOC404107	27:5327038-5328962	MANNHE	CTRL	15.9173	2.11822	-2.90967	0.000721596	yes
HSD17B14	18:55878588-55899000	MANNHE	CTRL	2.06243	0.284671	-2.85698	0.00135308	yes
LOC100847592	15:84484985-84492553	MANNHE	CTRL	1.04604	0.145354	-2.84729	0.00447872	yes
OIT3	28:29074091-29105089	MANNHE	CTRL	3.2806	0.477085	-2.78164	0.000721596	yes
TAP	27:4888376-4890195	MANNHE	CTRL	2.63948	0.388451	-2.76445	0.0289631	yes
COL1A1	19:37088245-37105761	MANNHE	CTRL	77.4892	11.554	-2.7456	0.000721596	yes
LOC100848337	25:38342492-38343056	MANNHE	CTRL	80.8451	12.1099	-2.73897	0.000721596	yes
PRTN3	7:44981097-44984484	MANNHE	CTRL	1.00072	0.150006	-2.73795	0.017848	yes
PRND	13:47444351-47449390	MANNHE	CTRL	0.659561	0.0996154	-2.72706	0.000721596	yes
MMP9	13:75466512-75473824	MANNHE	CTRL	12.2271	1.87369	-2.70613	0.000721596	yes
LOC100847582	19:37088245-37105761	MANNHE	CTRL	80.4298	12.6844	-2.66467	0.000721596	yes
EPN3	19:36811805-36821284	MANNHE	CTRL	0.42352	0.0668844	-2.66269	0.00400408	yes
TDRD1	26:34935713-34990386	MANNHE	CTRL	0.700057	0.114095	-2.61723	0.000721596	yes
MMP13	15:5912036-5922736	MANNHE	CTRL	2.98503	0.49748	-2.58503	0.000721596	yes
TREM1	23:15148070-15163188	MANNHE	CTRL	3.55312	0.595136	-2.5778	0.000721596	yes
SDSL	17:63278102-63289816	MANNHE	CTRL	0.580751	0.097303	-2.57736	0.0493682	yes
APLNR	15:81734844-81738412	MANNHE	CTRL	1.97637	0.333718	-2.56615	0.000721596	yes
COL4A1	12:88876124-89009422	MANNHE	CTRL	37.9266	6.40782	-2.5653	0.000721596	yes
CHI3L1	16:771322-781451	MANNHE	CTRL	32.6911	5.52995	-2.56356	0.000721596	yes
MPO	19:9473000-9484176	MANNHE	CTRL	1.29347	0.221463	-2.54611	0.000721596	yes
COL3A1	2:7317286-7356904	MANNHE	CTRL	152.794	26.4446	-2.53054	0.000721596	yes
KLK12	18:57461616-57465567	MANNHE	CTRL	2.26095	0.395035	-2.51688	0.00246199	yes
OSCAR	18:63473367-63474866	MANNHE	CTRL	3.66586	0.642299	-2.51283	0.0203765	yes
FAP	2:34297725-34376829	MANNHE	CTRL	0.482237	0.0848437	-2.50686	0.000721596	yes
TFPI	2:8786392-8884005	MANNHE	CTRL	2.94814	0.522624	-2.49596	0.000721596	yes
FAM124B	2:113274586-113287683	MANNHE	CTRL	0.405744	0.0723716	-2.48708	0.000721596	yes
CXCL6	6:90645963-90648082	MANNHE	CTRL	5.31974	0.96439	-2.46367	0.000721596	yes
FAM198B	17:41769526-41784196	MANNHE	CTRL	0.961731	0.174378	-2.46342	0.000721596	yes
C7H19orf59	7:17746045-17748831	MANNHE	CTRL	9.69807	1.76025	-2.46192	0.000721596	yes
ACTG2	11:10717557-10740084	MANNHE	CTRL	27.423	5.05351	-2.44003	0.000721596	yes
LOXL2	8:71278581-71390893	MANNHE	CTRL	5.64022	1.04309	-2.43488	0.000721596	yes
LOC520070	29:45015999-45018614	MANNHE	CTRL	5.22787	0.97489	-2.42291	0.000721596	yes
TNFRSF17	25:10736934-10740164	MANNHE	CTRL	49.6082	9.31147	-2.4135	0.000721596	yes
COL8A1	1:43541935-43717620	MANNHE	CTRL	0.874553	0.167891	-2.38102	0.000721596	yes
COL1A2	4:11624469-11661163	MANNHE	CTRL	96.9947	18.7937	-2.36765	0.000721596	yes
CLDN3	25:34018455-34019670	MANNHE	CTRL	8.57154	1.66845	-2.36105	0.000721596	yes
PI16	23:10836789-10848749	MANNHE	CTRL	3.49663	0.680825	-2.36061	0.000721596	yes
OLFM4	12:10667341-10690293	MANNHE	CTRL	1.56845	0.307178	-2.35219	0.000721596	yes
COL4A2	12:89056706-89166036	MANNHE	CTRL	25.137	4.95103	-2.34401	0.000721596	yes
TCN1	15:84389635-84404937	MANNHE	CTRL	2.33895	0.461766	-2.34062	0.000721596	yes
LOC509034	10:87896636-87907378	MANNHE	CTRL	3.21854	0.637164	-2.33667	0.000721596	yes
IL1RN	11:46699165-46706152	MANNHE	CTRL	17.5561	3.47691	-2.33609	0.000721596	yes
SAA3	29:26668044-26671778	MANNHE	CTRL	57.9814	11.5966	-2.32189	0.000721596	yes
CXCL14	7:48661076-48669442	MANNHE	CTRL	0.451671	0.0904752	-2.31968	0.0126481	yes
LOC511353	17:72815146-72817914	MANNHE	CTRL	406.343	81.5203	-2.31747	0.000721596	yes
MAPK13	23:10036686-10045047	MANNHE	CTRL	1.95666	0.39287	-2.31627	0.000721596	yes
PF4	6:90673204-90674173	MANNHE	CTRL	1.29233	0.259967	-2.31357	0.0498058	yes
FBP2	8:82396094-82438817	MANNHE	CTRL	1.23574	0.249438	-2.30862	0.000721596	yes
SERPINF1	19:23418895-23430668	MANNHE	CTRL	8.76831	1.77819	-2.30189	0.000721596	yes
GP5	1:73740502-73742417	MANNHE	CTRL	0.439094	0.0892298	-2.29893	0.0279965	yes
KIAA1199	21:27232611-27297774	MANNHE	CTRL	17.3787	3.53485	-2.2976	0.000721596	yes
KLK10	18:57448223-57454197	MANNHE	CTRL	0.938655	0.191771	-2.29121	0.000721596	yes
PERP	9:76937940-76952270	MANNHE	CTRL	8.38518	1.7164	-2.28845	0.000721596	yes
FBLN1	5:116616199-116695696	MANNHE	CTRL	13.2928	2.72344	-2.28714	0.000721596	yes
DEFB10	27:6194469-6196146	MANNHE	CTRL	185.927	38.4104	-2.27517	0.000721596	yes
SDC1	11:78687992-78719307	MANNHE	CTRL	13.1577	2.7218	-2.27327	0.000721596	yes
CSF3R	3:110001844-110012771	MANNHE	CTRL	11.1182	2.30094	-2.27263	0.000721596	yes
CCR10	19:43377278-43379246	MANNHE	CTRL	10.2559	2.12701	-2.26956	0.000721596	yes
MMP3	15:6028010-6034595	MANNHE	CTRL	0.782347	0.162946	-2.26342	0.00135308	yes
LOC614522	3:48451879-48493897	MANNHE	CTRL	27.9172	5.84075	-2.25693	0.000721596	yes
SLC16A12	26:11141010-11161478	MANNHE	CTRL	0.42451	0.0894861	-2.24606	0.0160992	yes
MXRA5	X:138878611-138902892	MANNHE	CTRL	1.95464	0.413571	-2.2407	0.000721596	yes
TIMP1	X:91232234-91236073	MANNHE	CTRL	119.129	25.2208	-2.23984	0.000721596	yes
OLR1	5:100244326-100255632	MANNHE	CTRL	2.51812	0.539487	-2.22268	0.000721596	yes
S100A12	3:17164141-17165266	MANNHE	CTRL	57.8552	12.4044	-2.22159	0.000721596	yes
PADI4	2:135836955-135864707	MANNHE	CTRL	1.28594	0.276524	-2.21735	0.000721596	yes
MZB1	7:52285861-52288594	MANNHE	CTRL	850.329	188.939	-2.1701	0.000721596	yes
ASPHD2	17:68354332-68363383	MANNHE	CTRL	27.755	6.19672	-2.16317	0.000721596	yes
LOC100847295	22:40089447-40361293	MANNHE	CTRL	0.522188	0.116892	-2.15939	0.0339772	yes
PI3	13:74272868-74274941	MANNHE	CTRL	2.3553	0.532953	-2.14383	0.00492261	yes
FAM46C	3:25664369-25722926	MANNHE	CTRL	63.0566	14.2833	-2.14231	0.000721596	yes
DEFB7	27:5184933-5186829	MANNHE	CTRL	8.91029	2.04263	-2.12504	0.000721596	yes
LOC535166	14:35399030-35568877	MANNHE	CTRL	2.21861	0.51728	-2.10064	0.000721596	yes
LOC100847159	17:68558852-68559831	MANNHE	CTRL	55.3207	13.0781	-2.08066	0.000721596	yes
HIGD1B	19:45194103-45196729	MANNHE	CTRL	1.66233	0.394782	-2.07408	0.0384246	yes
LOC531152	17:73881054-73899731	MANNHE	CTRL	0.769195	0.186345	-2.04538	0.000721596	yes
LOC790886	16:6038114-6039157	MANNHE	CTRL	4.69922	1.14911	-2.0319	0.00577637	yes
WIPI1	19:62368394-62479266	MANNHE	CTRL	11.3456	2.80462	-2.01626	0.000721596	yes
SLC13A5	19:25792456-25815845	MANNHE	CTRL	2.97463	0.738836	-2.00938	0.000721596	yes
FABP7	9:28834076-28837863	MANNHE	CTRL	2.61804	0.65418	-2.00073	0.000721596	yes
PRSS35	9:23710553-23729764	MANNHE	CTRL	0.505078	0.126438	-1.99808	0.000721596	yes
PAMR1	15:66754733-66832246	MANNHE	CTRL	1.28566	0.322002	-1.99736	0.000721596	yes
TNFRSF8	16:42440210-42502469	MANNHE	CTRL	4.89041	1.22922	-1.99221	0.000721596	yes
TRAM2	23:24637957-24702830	MANNHE	CTRL	34.785	8.75054	-1.99102	0.000721596	yes
STEAP4	4:72833496-72862037	MANNHE	CTRL	1.74247	0.438438	-1.99069	0.000721596	yes
BNBD-9-LIKE	27:5221841-5227985	MANNHE	CTRL	12.3155	3.10142	-1.98948	0.000721596	yes
COL5A1	11:106986852-106995341	MANNHE	CTRL	2.75557	0.694655	-1.98798	0.000721596	yes
MALL	11:1747908-1780103	MANNHE	CTRL	2.27667	0.574014	-1.98777	0.000721596	yes
CHAC1	10:36598393-36600765	MANNHE	CTRL	2.41161	0.608869	-1.98579	0.000721596	yes
LOC619159	18:63016552-63019917	MANNHE	CTRL	1.22096	0.310259	-1.97647	0.00135308	yes
MYBPH	16:760054-768350	MANNHE	CTRL	1.19317	0.304531	-1.97014	0.000721596	yes
FAM162B	9:34300227-34313246	MANNHE	CTRL	0.418145	0.107075	-1.96537	0.00786391	yes
C7H19orf21	7:44942016-44951963	MANNHE	CTRL	3.72174	0.953148	-1.9652	0.000721596	yes
IL6	8:23287272-23287909	MANNHE	CTRL	2.98347	0.774435	-1.94577	0.000721596	yes
ERN1	19:48924480-49068570	MANNHE	CTRL	11.589	3.02765	-1.93649	0.000721596	yes
NTN1	19:29084418-29269338	MANNHE	CTRL	1.83685	0.485903	-1.91849	0.000721596	yes
BGN	X:39639905-39653691	MANNHE	CTRL	26.0025	6.89239	-1.91558	0.000721596	yes
SGK2	13:72864073-72883521	MANNHE	CTRL	1.48989	0.396549	-1.90964	0.000721596	yes
IGJ	6:87759434-87768832	MANNHE	CTRL	4515.92	1202.5	-1.90898	0.000721596	yes
C23H6orf132	23:15841663-15874544	MANNHE	CTRL	0.397649	0.105936	-1.90831	0.00534264	yes
DDAH1	3:58808969-58965541	MANNHE	CTRL	1.6162	0.432475	-1.90191	0.000721596	yes
LOC100300896	11:44706972-44717428	MANNHE	CTRL	8.29782	2.22266	-1.90044	0.000721596	yes
ADAMTS15	29:37143461-37165575	MANNHE	CTRL	0.494261	0.132762	-1.89644	0.00193035	yes
CTSG	21:35184045-35187246	MANNHE	CTRL	0.740135	0.199898	-1.88853	0.04241	yes
HSPA6	3:8027759-8029969	MANNHE	CTRL	10.1303	2.73767	-1.88765	0.000721596	yes
MED12L	1:117548525-117952786	MANNHE	CTRL	4.42141	1.19889	-1.8828	0.00447872	yes
C19H17orf28	19:57076158-57097118	MANNHE	CTRL	26.305	7.18282	-1.87272	0.000721596	yes
NFE2	5:25929034-25936083	MANNHE	CTRL	3.60739	0.985128	-1.87257	0.000721596	yes
APOA1	15:27932197-27934085	MANNHE	CTRL	7.56675	2.06748	-1.8718	0.000721596	yes
LOC100847432	21:67520779-67524754	MANNHE	CTRL	0.471679	0.13005	-1.85874	0.000721596	yes
CHP2	25:21657895-21661311	MANNHE	CTRL	0.520367	0.143794	-1.85553	0.0160992	yes
HCAR2	17:55053586-55054935	MANNHE	CTRL	1.43443	0.397524	-1.85137	0.000721596	yes
IL1B	11:46410276-46418785	MANNHE	CTRL	15.9456	4.46015	-1.83799	0.000721596	yes
PDPN	16:55410365-55442624	MANNHE	CTRL	4.49906	1.25984	-1.83639	0.000721596	yes
PDIA4	4:112989510-113006466	MANNHE	CTRL	478.384	134.008	-1.83585	0.000721596	yes
VNN2	9:71884620-71913826	MANNHE	CTRL	5.76544	1.61646	-1.83459	0.000721596	yes
DPEP3	18:35576306-35580517	MANNHE	CTRL	3.93573	1.11203	-1.82343	0.000721596	yes
DPT	16:37106631-37143040	MANNHE	CTRL	8.29759	2.36364	-1.81168	0.000721596	yes
COL5A2	2:7139408-7300563	MANNHE	CTRL	10.7296	3.07017	-1.80521	0.000721596	yes
ELL2	7:97621823-97693509	MANNHE	CTRL	73.4849	21.2552	-1.78963	0.000721596	yes
CD101	3:26318750-26355162	MANNHE	CTRL	1.2132	0.351998	-1.78518	0.000721596	yes
LOC521568	12:71903904-72005987	MANNHE	CTRL	2.78421	0.808023	-1.7848	0.000721596	yes
MRAP2	9:66223875-66287509	MANNHE	CTRL	0.774064	0.224681	-1.78458	0.00135308	yes
CFB	23:27225265-27231292	MANNHE	CTRL	62.1109	18.0803	-1.78042	0.000721596	yes
GALNTL1	10:81396103-81494772	MANNHE	CTRL	7.46178	2.1754	-1.77824	0.000721596	yes
MMP2	18:23828618-23855027	MANNHE	CTRL	13.6568	4.04212	-1.75644	0.000721596	yes
LOC100297617	27:5788619-5790540	MANNHE	CTRL	12.624	3.7598	-1.74744	0.000721596	yes
CKAP4	5:69971125-69981003	MANNHE	CTRL	69.5053	20.7829	-1.74172	0.000721596	yes
ELANE	7:44988171-44990573	MANNHE	CTRL	1.59029	0.47886	-1.73161	0.00447872	yes
MFAP5	5:101647628-101659388	MANNHE	CTRL	8.3325	2.50986	-1.73114	0.000721596	yes
LOC100302527	X:18627967-18629815	MANNHE	CTRL	1.75923	0.531163	-1.72771	0.000721596	yes
ITGA7	5:57873911-57901249	MANNHE	CTRL	3.42204	1.03328	-1.72762	0.000721596	yes
CXHXorf36	X:103969314-104013030	MANNHE	CTRL	3.32183	1.01288	-1.71352	0.000721596	yes
CRELD2	5:120933368-120940337	MANNHE	CTRL	124.401	38.0329	-1.70968	0.000721596	yes
CREB3L2	4:102401897-102529709	MANNHE	CTRL	20.677	6.347	-1.70388	0.000721596	yes
ARID3A	7:45084726-45114530	MANNHE	CTRL	38.7329	11.8904	-1.70376	0.000721596	yes
LOX	7:33089539-33101646	MANNHE	CTRL	1.62492	0.502874	-1.6921	0.000721596	yes
SLC16A10	9:39647513-39759908	MANNHE	CTRL	2.08992	0.647043	-1.69152	0.000721596	yes
LOC505941	13:38289289-38317485	MANNHE	CTRL	106.164	32.8977	-1.69023	0.000721596	yes
LOC100847833	3:26318750-26355162	MANNHE	CTRL	2.12719	0.661514	-1.6851	0.00950032	yes
HSPB2	15:22571244-22572575	MANNHE	CTRL	12.8793	4.03083	-1.6759	0.000721596	yes
SLC16A6	19:62486091-62496100	MANNHE	CTRL	22.407	7.05133	-1.66798	0.000721596	yes
NOV	14:47005556-47013935	MANNHE	CTRL	5.34805	1.68466	-1.66655	0.000721596	yes
SPARC	7:64862329-64900826	MANNHE	CTRL	303.86	95.7759	-1.66567	0.000721596	yes
ITGA11	10:15102957-15236791	MANNHE	CTRL	1.04343	0.32902	-1.66509	0.000721596	yes
SEMA3C	4:40140493-40345591	MANNHE	CTRL	0.400389	0.126327	-1.66424	0.00351112	yes
TXNDC5	23:47305529-47349788	MANNHE	CTRL	743.309	236.104	-1.65454	0.000721596	yes
TMEM150B	18:62608570-62615882	MANNHE	CTRL	5.30183	1.68813	-1.65106	0.000721596	yes
GGH	14:29736443-29759096	MANNHE	CTRL	12.7078	4.04927	-1.64998	0.000721596	yes
HSP90B1	5:67940791-67959532	MANNHE	CTRL	841.108	268.604	-1.64681	0.000721596	yes
TNXB	23:27083541-27140674	MANNHE	CTRL	3.04841	0.976165	-1.64286	0.000721596	yes
ADAMTS9	22:36876903-37038527	MANNHE	CTRL	1.25325	0.40197	-1.64052	0.000721596	yes
SMTNL2	19:25702552-25724157	MANNHE	CTRL	0.445843	0.143587	-1.63461	0.0145064	yes
ADC	2:121400451-121447281	MANNHE	CTRL	0.687153	0.221642	-1.6324	0.00246199	yes
ATP7B	12:21414045-21463534	MANNHE	CTRL	1.55463	0.501623	-1.63189	0.000721596	yes
ADAMTS4	3:8322535-8330396	MANNHE	CTRL	2.87657	0.929462	-1.62988	0.000721596	yes
ADAMTS5	1:8811791-8861602	MANNHE	CTRL	1.87021	0.60592	-1.626	0.000721596	yes
SOSTDC1	4:24927681-24931927	MANNHE	CTRL	0.524362	0.1699	-1.62587	0.0129883	yes
LMAN1	24:58797002-58815926	MANNHE	CTRL	138.29	45.1528	-1.61481	0.000721596	yes
MOK	21:68706702-68736526	MANNHE	CTRL	1.05087	0.343195	-1.61448	0.00193035	yes
PCDH1	7:54624663-54639999	MANNHE	CTRL	1.97282	0.645279	-1.61227	0.000721596	yes
HEBP2	9:77215759-77222555	MANNHE	CTRL	1.85055	0.605885	-1.61084	0.000721596	yes
UNC5C	6:30361297-30787250	MANNHE	CTRL	0.446563	0.146535	-1.60762	0.000721596	yes
RASGRF2	7:83362790-83546434	MANNHE	CTRL	0.393473	0.12947	-1.60365	0.00400408	yes
ELTD1	3:65921136-66062041	MANNHE	CTRL	3.73079	1.22835	-1.60276	0.000721596	yes
FICD	17:66628035-66631575	MANNHE	CTRL	18.8831	6.23695	-1.59818	0.000721596	yes
CSTB	1:146555391-146558844	MANNHE	CTRL	32.8788	10.8813	-1.5953	0.000721596	yes
PLIN4	7:20831521-20841692	MANNHE	CTRL	0.38893	0.128913	-1.59312	0.00826171	yes
CYP3A4	25:37125928-37175162	MANNHE	CTRL	1.42329	0.472053	-1.59221	0.000721596	yes
FN1	2:103881401-103950562	MANNHE	CTRL	48.7463	16.2156	-1.58791	0.000721596	yes
SPCS3	5:21543986-21546253	MANNHE	CTRL	135.638	45.1782	-1.58606	0.000721596	yes
SLC6A15	5:14572185-14604741	MANNHE	CTRL	0.528994	0.176818	-1.58099	0.00298038	yes
LOC100336251	18:34193718-34215940	MANNHE	CTRL	7.6124	2.54573	-1.58027	0.000721596	yes
LOC508666	19:14759735-14764912	MANNHE	CTRL	77.7893	26.2192	-1.56895	0.000721596	yes
SPON1	15:38991043-39309268	MANNHE	CTRL	6.64034	2.28184	-1.54106	0.000721596	yes
CXCR2	2:106936877-106938583	MANNHE	CTRL	2.66143	0.915157	-1.54011	0.000721596	yes
LHX6	11:93068238-93090242	MANNHE	CTRL	1.0281	0.353593	-1.53982	0.00246199	yes
FFAR2	18:46312167-46314341	MANNHE	CTRL	0.957257	0.329336	-1.53934	0.0200859	yes
BCL6B	19:27447121-27451108	MANNHE	CTRL	3.87497	1.33978	-1.53219	0.000721596	yes
SOD2	9:97399158-97427298	MANNHE	CTRL	191.828	66.3378	-1.53191	0.000721596	yes
IRF4	23:52050984-52063706	MANNHE	CTRL	94.9923	32.9445	-1.52777	0.000721596	yes
E2F7	5:6429587-6466491	MANNHE	CTRL	1.76628	0.614248	-1.52382	0.000721596	yes
CD109	9:13421248-13551862	MANNHE	CTRL	1.24169	0.432524	-1.52145	0.000721596	yes
FNDC3B	1:95888013-96173201	MANNHE	CTRL	23.5796	8.22109	-1.52014	0.000721596	yes
L3MBTL1	13:72816396-72847320	MANNHE	CTRL	4.47611	1.56348	-1.51749	0.000721596	yes
SEMA6B	7:20787801-20807768	MANNHE	CTRL	2.4339	0.851096	-1.51588	0.000721596	yes
LOC100848019	9:97390460-97395406	MANNHE	CTRL	70.0673	24.6695	-1.50601	0.000721596	yes
NES	3:14208427-14215602	MANNHE	CTRL	3.48422	1.23012	-1.50204	0.000721596	yes
PDE1C	4:64574144-65110749	MANNHE	CTRL	0.692096	0.244577	-1.50069	0.00400408	yes
COL6A3	3:117408826-117482330	MANNHE	CTRL	9.51529	3.36528	-1.49952	0.000721596	yes
EMB	20:28702404-28743621	MANNHE	CTRL	5.80169	2.0541	-1.49797	0.000721596	yes
FCER1A	3:10539986-10546195	MANNHE	CTRL	6.23521	2.21076	-1.49589	0.000721596	yes
WDR17	27:6618844-6673112	MANNHE	CTRL	1.18857	0.421965	-1.49404	0.000721596	yes
CDH5	18:34260149-34275150	MANNHE	CTRL	23.3486	8.29467	-1.49308	0.000721596	yes
LOC515578	24:743786-758422	MANNHE	CTRL	2.968	1.05548	-1.4916	0.000721596	yes
LOC788414	2:136768698-136781478	MANNHE	CTRL	1.18743	0.422302	-1.4915	0.000721596	yes
AQP9	10:52151844-52199561	MANNHE	CTRL	0.562631	0.20152	-1.48126	0.00826171	yes
DPEP2	18:35583498-35587974	MANNHE	CTRL	14.1285	5.06359	-1.48038	0.000721596	yes
EDEM3	16:67206282-67278874	MANNHE	CTRL	44.3652	15.9052	-1.47992	0.000721596	yes
SLC1A4	11:63337654-63367593	MANNHE	CTRL	29.6874	10.6514	-1.4788	0.000721596	yes
PARVB	5:115517820-115574009	MANNHE	CTRL	27.7082	9.97201	-1.47436	0.000721596	yes
XBP1	17:70344600-70349566	MANNHE	CTRL	343.004	123.476	-1.47399	0.000721596	yes
AHNAK2	21:71007316-71022057	MANNHE	CTRL	1.06137	0.382172	-1.47364	0.000721596	yes
SLC41A1	16:3367779-3384777	MANNHE	CTRL	16.9376	6.14105	-1.46367	0.000721596	yes
NOS2	19:19758763-19790464	MANNHE	CTRL	3.14028	1.14104	-1.46054	0.000721596	yes
BCL2L15	3:29643175-29648016	MANNHE	CTRL	31.4391	11.4479	-1.45748	0.000721596	yes
PYCR1	19:51567327-51571991	MANNHE	CTRL	36.7719	13.3975	-1.45663	0.000721596	yes
ARSG	19:62368394-62479266	MANNHE	CTRL	20.4024	7.50169	-1.44345	0.000721596	yes
LOC781004	16:5919489-5978837	MANNHE	CTRL	0.537617	0.197695	-1.4433	0.00619986	yes
M-SAA3.2	29:26755566-26759547	MANNHE	CTRL	267.35	98.5511	-1.43979	0.000721596	yes
PRDX4	X:126551743-126564689	MANNHE	CTRL	185.253	68.3221	-1.43908	0.000721596	yes
AQP3	8:76525365-76531321	MANNHE	CTRL	30.2695	11.2487	-1.42811	0.000721596	yes
FMOD	16:925080-935131	MANNHE	CTRL	9.0433	3.36479	-1.42633	0.000721596	yes
COL21A1	23:3946456-4181456	MANNHE	CTRL	1.62021	0.603444	-1.42489	0.000721596	yes
LOC528412	12:73167278-73190990	MANNHE	CTRL	2.72496	1.01876	-1.41942	0.000721596	yes
ACE2	X:135148995-135198063	MANNHE	CTRL	0.536571	0.200871	-1.4175	0.00400408	yes
DARC	3:10647479-10648919	MANNHE	CTRL	13.2822	4.98588	-1.41357	0.000721596	yes
LUM	5:21037442-21044658	MANNHE	CTRL	17.4328	6.54852	-1.41256	0.000721596	yes
STAC	22:10160884-10273698	MANNHE	CTRL	1.90101	0.715838	-1.40906	0.000721596	yes
MANF	22:49946212-49950052	MANNHE	CTRL	347.988	131.04	-1.40903	0.000721596	yes
TM4SF18	1:119800139-119823459	MANNHE	CTRL	12.7844	4.81859	-1.40771	0.000721596	yes
LOC100848177	7:54111808-54114447	MANNHE	CTRL	0.73837	0.280859	-1.3945	0.00400408	yes
PDE7B	9:75034592-75191800	MANNHE	CTRL	0.742832	0.282799	-1.39326	0.0107181	yes
LOC100301431	18:49288006-49296683	MANNHE	CTRL	2.55668	0.975412	-1.39019	0.000721596	yes
ADAMTS12	20:39913084-40304028	MANNHE	CTRL	0.680749	0.260174	-1.38764	0.000721596	yes
VLDLR	8:42109678-42141155	MANNHE	CTRL	6.90695	2.64376	-1.38546	0.000721596	yes
FAM167B	2:122115658-122117248	MANNHE	CTRL	6.62346	2.53828	-1.38373	0.000721596	yes
EXOC3L2	18:53302938-53313115	MANNHE	CTRL	1.98709	0.763123	-1.38067	0.00298038	yes
SLCO2A1	1:136435601-136528514	MANNHE	CTRL	12.2263	4.69777	-1.37994	0.000721596	yes
CLEC14A	21:48843724-48845622	MANNHE	CTRL	5.77602	2.22412	-1.37684	0.000721596	yes
FBLN2	22:58989965-59059137	MANNHE	CTRL	6.19363	2.38528	-1.37663	0.000721596	yes
MEST	4:95066961-95079691	MANNHE	CTRL	10.7905	4.16005	-1.37509	0.000721596	yes
SLC2A10	13:76091991-76103853	MANNHE	CTRL	2.45451	0.951393	-1.36732	0.000721596	yes
SDS	17:63302946-63311101	MANNHE	CTRL	36.5437	14.1734	-1.36644	0.000721596	yes
C12H13orf33	12:30021741-30039901	MANNHE	CTRL	1.07019	0.416018	-1.36315	0.00492261	yes
MECOM	1:98516454-99144558	MANNHE	CTRL	0.876503	0.341428	-1.36018	0.000721596	yes
MMP19	5:57751505-57757617	MANNHE	CTRL	7.57513	2.95212	-1.35952	0.000721596	yes
A2M	5:101298126-101346611	MANNHE	CTRL	127.699	49.823	-1.35787	0.000721596	yes
LOC100297063	25:2529276-2533024	MANNHE	CTRL	5.23379	2.04248	-1.35754	0.00193035	yes
HPDL	3:101333427-101335081	MANNHE	CTRL	1.94681	0.761694	-1.35383	0.00135308	yes
GAB2	29:17828867-17887917	MANNHE	CTRL	14.7147	5.76219	-1.35256	0.000721596	yes
DUSP26	27:28963363-28969954	MANNHE	CTRL	0.996039	0.390704	-1.35013	0.0191947	yes
SRSF12	9:61890329-61907655	MANNHE	CTRL	12.0993	4.75307	-1.34799	0.000721596	yes
COL18A1	1:146989202-147041015	MANNHE	CTRL	21.4103	8.41852	-1.34667	0.000721596	yes
HSPG2	2:131508855-131596962	MANNHE	CTRL	13.7827	5.43475	-1.34258	0.000721596	yes
ITGBL1	12:81873526-82108677	MANNHE	CTRL	0.612424	0.241517	-1.3424	0.0326586	yes
COL15A1	8:64437275-64540739	MANNHE	CTRL	18.8394	7.44566	-1.33928	0.000721596	yes
SERPINA5	21:59398008-59808715	MANNHE	CTRL	1.91192	0.75577	-1.339	0.043146	yes
SEC11C	24:58659024-58670239	MANNHE	CTRL	179.189	70.8691	-1.33825	0.000721596	yes
ANKMY1	3:120269770-120295644	MANNHE	CTRL	0.684777	0.270995	-1.33737	0.00400408	yes
RCN3	18:56422332-56430761	MANNHE	CTRL	58.6662	23.2398	-1.33593	0.000721596	yes
IL1R2	11:6721484-6757780	MANNHE	CTRL	11.7258	4.64667	-1.33542	0.000721596	yes
TMEM190	18:62555137-62564977	MANNHE	CTRL	6.73155	2.6692	-1.33453	0.00246199	yes
MARCO	2:71099066-71134082	MANNHE	CTRL	341.297	135.343	-1.33441	0.000721596	yes
PLOD2	1:123322466-123444003	MANNHE	CTRL	5.6781	2.25445	-1.33263	0.000721596	yes
ST6GALNAC6	11:98567330-98580373	MANNHE	CTRL	18.1199	7.20504	-1.33049	0.000721596	yes
CCL14	19:14775261-14780085	MANNHE	CTRL	44.308	17.6506	-1.32785	0.000721596	yes
TMEM158	22:54635350-54636968	MANNHE	CTRL	5.12384	2.04611	-1.32434	0.000721596	yes
PCDH12	7:54690459-54702923	MANNHE	CTRL	3.04659	1.21709	-1.32376	0.000721596	yes
LOC786649	19:24274384-24453238	MANNHE	CTRL	3.64201	1.46163	-1.31716	0.000721596	yes
LOC616014	28:6242871-6299384	MANNHE	CTRL	1.76043	0.706839	-1.31647	0.000721596	yes
ENHO	8:77234222-77236116	MANNHE	CTRL	5.65129	2.27463	-1.31295	0.000721596	yes
AQP1	4:65830988-65845186	MANNHE	CTRL	37.1452	14.9633	-1.31175	0.000721596	yes
SLC7A5	18:13341369-13370493	MANNHE	CTRL	23.1488	9.32675	-1.31149	0.000721596	yes
LOC539690	13:42244261-42247598	MANNHE	CTRL	26.0022	10.4808	-1.31089	0.000721596	yes
DNAJC3	12:76958977-77024110	MANNHE	CTRL	115.146	46.4674	-1.30917	0.000721596	yes
C11H2orf50	11:86617514-86620757	MANNHE	CTRL	3.36706	1.35922	-1.30871	0.0111208	yes
SEC61A1	22:60217807-60229341	MANNHE	CTRL	189.954	76.8707	-1.30515	0.000721596	yes
SNCA	6:36284033-36432430	MANNHE	CTRL	7.70537	3.12272	-1.30306	0.000721596	yes
TEAD4	5:107264074-107325296	MANNHE	CTRL	2.25686	0.914786	-1.30281	0.00193035	yes
CLEC5A	4:106059500-106070381	MANNHE	CTRL	2.54232	1.03254	-1.29994	0.00868468	yes
STARD13	12:27866073-28033238	MANNHE	CTRL	9.87243	4.01605	-1.29763	0.000721596	yes
OLFML2A	11:95774035-95806160	MANNHE	CTRL	3.64439	1.48382	-1.29636	0.000721596	yes
LOC100847471	8:72499099-72523549	MANNHE	CTRL	22.8348	9.33633	-1.29031	0.000721596	yes
MEFV	25:2686368-2704327	MANNHE	CTRL	0.978614	0.400395	-1.28932	0.00193035	yes
PRKCDBP	15:47329715-47331336	MANNHE	CTRL	19.2853	7.89255	-1.28894	0.000721596	yes
ANKRD56	6:93484588-93488711	MANNHE	CTRL	0.933767	0.38248	-1.28768	0.00193035	yes
GABRD	16:51963930-51974494	MANNHE	CTRL	3.43547	1.40739	-1.28749	0.000721596	yes
CNTNAP1	19:43380113-43394560	MANNHE	CTRL	8.2188	3.36803	-1.28702	0.000721596	yes
SCHIP1	1:108383676-108454122	MANNHE	CTRL	1.64682	0.675285	-1.28612	0.00492261	yes
MAGIX	X:92283810-92291669	MANNHE	CTRL	2.85467	1.17193	-1.28444	0.000721596	yes
TNFRSF13B	19:35688978-35726851	MANNHE	CTRL	12.4576	5.116	-1.28394	0.000721596	yes
LOC504694	21:30840506-30897314	MANNHE	CTRL	4.03562	1.65821	-1.28316	0.000721596	yes
CNN1	7:17106393-17114224	MANNHE	CTRL	10.885	4.47895	-1.28111	0.000721596	yes
CCDC80	1:57819989-57855630	MANNHE	CTRL	17.3084	7.12487	-1.28054	0.000721596	yes
HTRA3	6:119388903-119419275	MANNHE	CTRL	2.20447	0.907709	-1.28013	0.000721596	yes
WFDC1	18:10558019-10587119	MANNHE	CTRL	4.80038	1.97747	-1.27949	0.000721596	yes
DNAJB9	4:59970935-59973819	MANNHE	CTRL	51.6943	21.3077	-1.27863	0.000721596	yes
TRIL	4:67651834-67654339	MANNHE	CTRL	0.563887	0.232612	-1.27748	0.0197488	yes
APOLD1	5:97520907-97524789	MANNHE	CTRL	2.73388	1.12787	-1.27735	0.000721596	yes
TIMP2	19:54079296-54131054	MANNHE	CTRL	74.908	31.0008	-1.27282	0.000721596	yes
KREMEN1	17:70561705-70601693	MANNHE	CTRL	1.44387	0.598227	-1.27118	0.00619986	yes
ENTPD1	26:17048734-17148147	MANNHE	CTRL	15.4833	6.42425	-1.26911	0.000721596	yes
NEURL1B	20:4315561-4357487	MANNHE	CTRL	3.11214	1.29296	-1.26723	0.000721596	yes
TM4SF20	2:116332502-116343431	MANNHE	CTRL	13.0398	5.41909	-1.2668	0.000721596	yes
SLCO4A1	13:55149363-55172423	MANNHE	CTRL	9.4402	3.92571	-1.26586	0.000721596	yes
NEFL	8:73180098-73184369	MANNHE	CTRL	0.665163	0.276702	-1.26537	0.0185216	yes
TBX2	19:11942208-11951631	MANNHE	CTRL	1.61262	0.671507	-1.26393	0.000721596	yes
PLEKHH3	19:43366277-43374706	MANNHE	CTRL	11.7291	4.89713	-1.26008	0.000721596	yes
S100A2	3:16869283-16872613	MANNHE	CTRL	2.8788	1.20203	-1.26	0.0495769	yes
LOC100848491	11:106879283-106946486	MANNHE	CTRL	3.95063	1.6544	-1.25577	0.000721596	yes
SYT17	25:16821398-16908660	MANNHE	CTRL	1.52533	0.639436	-1.25425	0.00351112	yes
AMPD3	15:42758941-42800251	MANNHE	CTRL	2.8126	1.17924	-1.25405	0.000721596	yes
PCDH17	12:5085885-5200843	MANNHE	CTRL	0.787391	0.33057	-1.25212	0.00246199	yes
FLNC	4:93609407-93637173	MANNHE	CTRL	1.08416	0.455419	-1.25131	0.000721596	yes
LOC100138645	19:43562654-43574472	MANNHE	CTRL	0.875726	0.367869	-1.25129	0.0111208	yes
SEC24D	6:7651872-7767010	MANNHE	CTRL	32.5901	13.699	-1.25036	0.000721596	yes
MASP1	1:80596923-80649367	MANNHE	CTRL	1.83092	0.769671	-1.25026	0.000721596	yes
SAG	3:113633793-113663575	MANNHE	CTRL	0.53878	0.227123	-1.24622	0.0426246	yes
HS6ST2	X:16394566-16783897	MANNHE	CTRL	1.16207	0.48993	-1.24605	0.00193035	yes
GFPT2	7:772144-817756	MANNHE	CTRL	8.54357	3.60563	-1.24459	0.000721596	yes
PROS1	1:37803107-37866950	MANNHE	CTRL	53.6835	22.6623	-1.24419	0.000721596	yes
LOC100337023	11:106854042-106879019	MANNHE	CTRL	10.3282	4.36351	-1.24302	0.000721596	yes
FBN1	10:61877807-62142171	MANNHE	CTRL	8.45052	3.57907	-1.23946	0.000721596	yes
LAMB1	4:49263404-49340000	MANNHE	CTRL	16.7237	7.08345	-1.23937	0.000721596	yes
LOC100847497	X:18181836-18189154	MANNHE	CTRL	0.512952	0.217647	-1.23683	0.0393022	yes
IGFBP7	6:74027218-74150456	MANNHE	CTRL	361.411	154.253	-1.22835	0.000721596	yes
PRSS23	29:8788701-8797308	MANNHE	CTRL	18.4301	7.87182	-1.22729	0.000721596	yes
LOC100139766	18:63276861-63284020	MANNHE	CTRL	1.59691	0.682131	-1.22717	0.00298038	yes
TUBB2A	23:50354842-50357632	MANNHE	CTRL	14.5841	6.2623	-1.21963	0.000721596	yes
MFSD2A	3:106724607-106737437	MANNHE	CTRL	2.33942	1.00491	-1.21908	0.000721596	yes
LTF	22:53521905-53556089	MANNHE	CTRL	6.33726	2.72259	-1.21888	0.000721596	yes
EXOC3L1	18:34940461-34946013	MANNHE	CTRL	5.54989	2.38436	-1.21886	0.000721596	yes
SELM	17:72064475-72068000	MANNHE	CTRL	30.7917	13.2472	-1.21685	0.000721596	yes
IL1RAP	1:77223040-77343645	MANNHE	CTRL	1.42704	0.614267	-1.21609	0.00298038	yes
CAV1	4:52173109-52208687	MANNHE	CTRL	17.5439	7.55286	-1.21588	0.000721596	yes
CYGB	19:55846582-55856333	MANNHE	CTRL	10.8702	4.6878	-1.21339	0.000721596	yes
CLEC11A	18:57259805-57262109	MANNHE	CTRL	2.19932	0.948814	-1.21286	0.00534264	yes
HHIPL1	21:66284692-66315180	MANNHE	CTRL	2.90667	1.26072	-1.20512	0.000721596	yes
COL16A1	2:122557457-122611965	MANNHE	CTRL	6.11833	2.65395	-1.205	0.000721596	yes
IGFBP6	5:27044007-27047853	MANNHE	CTRL	17.7329	7.72417	-1.19898	0.000721596	yes
DNAJB11	1:81234017-81252216	MANNHE	CTRL	90.7959	39.6007	-1.1971	0.000721596	yes
C7H19orf10	7:20683773-20695706	MANNHE	CTRL	126.843	55.404	-1.19498	0.000721596	yes
FBLIM1	16:53027477-53049143	MANNHE	CTRL	11.8046	5.16255	-1.1932	0.000721596	yes
TINAGL1	2:122685820-122697742	MANNHE	CTRL	9.05965	3.96859	-1.19083	0.000721596	yes
CLSTN3	5:103581381-103611327	MANNHE	CTRL	0.602864	0.264605	-1.18799	0.00577637	yes
SERTAD4	16:74993031-75000062	MANNHE	CTRL	0.605302	0.265959	-1.18645	0.00911938	yes
REEP1	11:48389167-48525025	MANNHE	CTRL	1.26151	0.55451	-1.18587	0.00135308	yes
GPX8	20:23975636-23980445	MANNHE	CTRL	9.99381	4.39375	-1.18558	0.000721596	yes
MMP15	18:26021949-26043124	MANNHE	CTRL	2.43343	1.07186	-1.18287	0.000721596	yes
CRLF1	7:4521072-4530910	MANNHE	CTRL	2.85743	1.25876	-1.18271	0.00135308	yes
PRDM1	9:44355219-44377512	MANNHE	CTRL	25.7031	11.3439	-1.18002	0.000721596	yes
CALR3	7:6450961-6476688	MANNHE	CTRL	1.17813	0.519992	-1.17994	0.0126481	yes
ZNF521	24:31675532-32049400	MANNHE	CTRL	2.12215	0.936962	-1.17946	0.000721596	yes
DDOST	2:132587723-132600988	MANNHE	CTRL	236.108	104.356	-1.17794	0.000721596	yes
SLC17A9	13:54916960-54931310	MANNHE	CTRL	50.2946	22.2462	-1.17685	0.000721596	yes
TMEM63C	10:89488355-89523829	MANNHE	CTRL	0.61543	0.272518	-1.17525	0.0216807	yes
GMPPB	22:51052511-51054901	MANNHE	CTRL	61.9122	27.4719	-1.17227	0.000721596	yes
TPBG	9:22454646-22456609	MANNHE	CTRL	1.93953	0.861048	-1.17154	0.00246199	yes
SEMA3A	4:36560825-36807918	MANNHE	CTRL	2.06532	0.917031	-1.17132	0.000721596	yes
HYOU1	15:30159426-30171029	MANNHE	CTRL	62.0624	27.5945	-1.16934	0.000721596	yes
AK1	11:98552023-98561576	MANNHE	CTRL	3.26282	1.45403	-1.16606	0.00703581	yes
EDN1	23:44010441-44017425	MANNHE	CTRL	1.83881	0.821246	-1.16289	0.000721596	yes
CDH26	13:57056585-57102992	MANNHE	CTRL	2.56079	1.14431	-1.16211	0.000721596	yes
PM20D2	9:61848878-61861891	MANNHE	CTRL	3.6732	1.642	-1.16158	0.00246199	yes
FKBP11	5:31023447-31061198	MANNHE	CTRL	296.335	132.973	-1.15609	0.000721596	yes
LOC100847310	18:52202331-52215613	MANNHE	CTRL	5.52597	2.48101	-1.1553	0.00745196	yes
FKBP14	4:66758678-66770727	MANNHE	CTRL	14.1616	6.36483	-1.15379	0.000721596	yes
UPP1	4:7528099-7556112	MANNHE	CTRL	3.8304	1.722	-1.15341	0.00534264	yes
GRRP1	2:127530910-127533980	MANNHE	CTRL	5.29903	2.38427	-1.15218	0.000721596	yes
LOC522960	23:31121341-31127011	MANNHE	CTRL	8.40195	3.78432	-1.15069	0.00135308	yes
HCRTR1	2:122641986-122649721	MANNHE	CTRL	0.846779	0.381461	-1.15045	0.0491377	yes
C1H21orf7	1:6366368-6415130	MANNHE	CTRL	0.931285	0.419861	-1.14931	0.0207311	yes
CFH	16:6052922-6122554	MANNHE	CTRL	9.50056	4.2844	-1.14892	0.000721596	yes
FAM195A	25:569039-605515	MANNHE	CTRL	50.1104	22.6398	-1.14625	0.000721596	yes
EPDR1	4:50028935-50066473	MANNHE	CTRL	1.04372	0.471885	-1.14522	0.00619986	yes
SSR3	1:111996967-112008222	MANNHE	CTRL	229.333	103.698	-1.14506	0.000721596	yes
RAB26	25:1680109-1686193	MANNHE	CTRL	2.59582	1.17388	-1.1449	0.00193035	yes
CCBP2	22:15553530-15561007	MANNHE	CTRL	3.2478	1.46937	-1.14426	0.00298038	yes
F2	15:77530564-77544935	MANNHE	CTRL	1.78066	0.805796	-1.14393	0.00534264	yes
CERCAM	11:99019920-99029867	MANNHE	CTRL	3.32882	1.5069	-1.14342	0.000721596	yes
TAB1	5:111346361-111372218	MANNHE	CTRL	33.4128	15.1369	-1.14233	0.000721596	yes
PCDHGA2	7:54106882-54110068	MANNHE	CTRL	1.29419	0.586344	-1.14223	0.00246199	yes
ANGPT1	14:59136609-59436693	MANNHE	CTRL	0.631771	0.286418	-1.14128	0.0225854	yes
TAGLN	15:28318410-28323667	MANNHE	CTRL	68.188	30.9392	-1.14008	0.000721596	yes
GPX3	7:64286947-64295117	MANNHE	CTRL	76.8101	34.8767	-1.13903	0.000721596	yes
POSTN	12:24241936-24276489	MANNHE	CTRL	8.23406	3.74318	-1.13734	0.000721596	yes
FAM129B	11:98231337-98283781	MANNHE	CTRL	7.99554	3.64127	-1.13475	0.000721596	yes
CLDN5	17:74749249-74750524	MANNHE	CTRL	85.0696	38.7524	-1.13436	0.000721596	yes
PTN	4:101685423-101795483	MANNHE	CTRL	7.35597	3.35192	-1.13393	0.000721596	yes
SHROOM4	X:93577261-93837007	MANNHE	CTRL	0.898628	0.409954	-1.13226	0.000721596	yes
ROBO4	29:28719987-28734705	MANNHE	CTRL	4.95614	2.26117	-1.13214	0.000721596	yes
GJA1	9:30127780-30140793	MANNHE	CTRL	21.8781	9.98805	-1.13121	0.000721596	yes
GALNTL4	15:41624350-41980710	MANNHE	CTRL	6.16716	2.81779	-1.13004	0.000721596	yes
MCAM	15:30413026-30422213	MANNHE	CTRL	10.851	4.9592	-1.12966	0.00135308	yes
ADAMTS1	1:8955133-8963831	MANNHE	CTRL	4.94719	2.2693	-1.12436	0.000721596	yes
PARM1	6:91597121-91723397	MANNHE	CTRL	36.977	17.0253	-1.11895	0.000721596	yes
ELN	25:33788121-33820666	MANNHE	CTRL	24.1328	11.1163	-1.11831	0.000721596	yes
CDH13	18:9189534-10164197	MANNHE	CTRL	5.22255	2.40746	-1.11724	0.000721596	yes
SIL1	7:51888628-52144488	MANNHE	CTRL	30.5214	14.0724	-1.11695	0.000721596	yes
LAMC1	16:65545496-65665386	MANNHE	CTRL	17.5122	8.07651	-1.11656	0.000721596	yes
PDIA6	11:86834831-86918106	MANNHE	CTRL	297.169	137.256	-1.11442	0.000721596	yes
PLCB1	13:789367-1695916	MANNHE	CTRL	0.767352	0.35617	-1.10732	0.00246199	yes
NID1	28:8731594-8830045	MANNHE	CTRL	8.36451	3.8879	-1.10529	0.000721596	yes
SCUBE3	23:9133905-9166228	MANNHE	CTRL	0.462141	0.214869	-1.10487	0.0287282	yes
LOC100336614	10:12098871-12114296	MANNHE	CTRL	1.31283	0.610643	-1.10428	0.000721596	yes
CPE	17:546401-697923	MANNHE	CTRL	0.840347	0.391202	-1.10307	0.00911938	yes
LOC100848971	19:43148012-43162165	MANNHE	CTRL	34.638	16.1436	-1.10139	0.000721596	yes
TOR2A	11:98409545-98429110	MANNHE	CTRL	22.8385	10.6443	-1.10139	0.000721596	yes
RELN	4:44891362-45475480	MANNHE	CTRL	0.965211	0.449918	-1.10118	0.000721596	yes
TIE1	3:103278177-103297710	MANNHE	CTRL	13.8373	6.45117	-1.10093	0.000721596	yes
SOX18	13:54295528-54297260	MANNHE	CTRL	15.0353	7.01482	-1.09988	0.000721596	yes
PROCR	13:65052809-65106553	MANNHE	CTRL	20.3973	9.52323	-1.09885	0.000721596	yes
BMP1	8:69980324-70028294	MANNHE	CTRL	7.55516	3.52846	-1.09843	0.000721596	yes
LOC100298791	17:73162745-73165741	MANNHE	CTRL	4.19945	1.96439	-1.09612	0.0347232	yes
P4HB	19:51643809-51653754	MANNHE	CTRL	315.95	148.13	-1.09283	0.000721596	yes
KIAA1751	16:52023630-52060357	MANNHE	CTRL	2.11222	0.990718	-1.09222	0.000721596	yes
KIAA1841	11:43693195-43739819	MANNHE	CTRL	0.663719	0.31136	-1.09199	0.0446022	yes
HSPA5	11:96115224-96119266	MANNHE	CTRL	432.316	202.884	-1.09143	0.000721596	yes
F13A1	23:48633935-48776698	MANNHE	CTRL	8.55834	4.02073	-1.08987	0.000721596	yes
EHD2	18:55071167-55087455	MANNHE	CTRL	14.073	6.61354	-1.08944	0.000721596	yes
LMNA	3:14697381-14715262	MANNHE	CTRL	20.8427	9.80147	-1.08847	0.000721596	yes
CCBE1	24:58886064-59114685	MANNHE	CTRL	1.64058	0.773652	-1.08445	0.0200859	yes
CREB5	4:67767159-68174402	MANNHE	CTRL	0.526398	0.248243	-1.0844	0.046727	yes
VWF	5:104603431-104727430	MANNHE	CTRL	15.2137	7.2011	-1.07909	0.000721596	yes
ERO1L	10:11438272-11488431	MANNHE	CTRL	15.3638	7.27271	-1.07897	0.000721596	yes
LRP11	9:88113877-88183314	MANNHE	CTRL	1.26153	0.597777	-1.0775	0.00351112	yes
BMX	X:135201307-135238777	MANNHE	CTRL	6.37584	3.02972	-1.07343	0.000721596	yes
ISM1	13:6959810-7051654	MANNHE	CTRL	0.583399	0.277242	-1.07334	0.0312604	yes
SPON2	6:109224625-109228237	MANNHE	CTRL	7.53314	3.58138	-1.07273	0.000721596	yes
LPHN2	3:62644404-63355165	MANNHE	CTRL	3.44414	1.6375	-1.07265	0.000721596	yes
WLS	3:77396242-77511241	MANNHE	CTRL	9.92455	4.72273	-1.07138	0.000721596	yes
IL23R	3:78400187-78473783	MANNHE	CTRL	0.859244	0.409245	-1.0701	0.0252751	yes
SEMA3F	22:50733056-50756457	MANNHE	CTRL	10.7923	5.14197	-1.06961	0.000721596	yes
FGL1	27:18447668-18472633	MANNHE	CTRL	4.24825	2.02566	-1.06848	0.000721596	yes
SOX7	8:8401285-8405958	MANNHE	CTRL	1.37535	0.656467	-1.06701	0.0491377	yes
LOC407171	18:63174841-63177879	MANNHE	CTRL	10.5974	5.06262	-1.06575	0.000721596	yes
PTGER3	3:74488313-74530201	MANNHE	CTRL	1.38756	0.663794	-1.06374	0.0355225	yes
ABCA10	19:61959545-62008975	MANNHE	CTRL	2.28657	1.09448	-1.06294	0.000721596	yes
CSPG5	22:52633994-52661606	MANNHE	CTRL	2.81875	1.35075	-1.0613	0.00193035	yes
FAM65C	13:79329172-79355653	MANNHE	CTRL	1.54498	0.741083	-1.05988	0.00193035	yes
RAPGEF4	2:23644875-23974945	MANNHE	CTRL	0.786771	0.377413	-1.0598	0.00298038	yes
DNM3	16:40118744-40774825	MANNHE	CTRL	0.722216	0.346797	-1.05834	0.0154114	yes
TMEM132E	19:15792360-15810652	MANNHE	CTRL	0.464856	0.223679	-1.05535	0.0498058	yes
PCDH7	6:51536862-52009280	MANNHE	CTRL	0.788885	0.380875	-1.0505	0.00193035	yes
TUBB3	18:14761259-14769915	MANNHE	CTRL	5.29471	2.55989	-1.04847	0.000721596	yes
FOSL2	11:71329771-71349193	MANNHE	CTRL	11.3435	5.4853	-1.04823	0.000721596	yes
LOC100848821	18:13341369-13370493	MANNHE	CTRL	33.3156	16.1307	-1.04639	0.00135308	yes
DCN	5:21080009-21119087	MANNHE	CTRL	132.816	64.3254	-1.04597	0.000721596	yes
LOC539069	19:43523725-43544796	MANNHE	CTRL	2.61245	1.26539	-1.04582	0.00135308	yes
LOC616323	11:49135529-49140111	MANNHE	CTRL	4.99186	2.41935	-1.04496	0.0103108	yes
ECE2	1:83507398-83539923	MANNHE	CTRL	2.1268	1.03115	-1.04443	0.000721596	yes
HIST1H1C	23:31636902-31639367	MANNHE	CTRL	11.8408	5.75497	-1.04089	0.000721596	yes
RET	28:13562992-13614530	MANNHE	CTRL	0.648454	0.315169	-1.04088	0.019495	yes
PLAC9	28:35366023-35378318	MANNHE	CTRL	2.35305	1.14372	-1.0408	0.0181914	yes
PKHD1L1	14:57049152-57216589	MANNHE	CTRL	1.3166	0.640407	-1.03976	0.000721596	yes
C1QTNF5	15:30448398-30450337	MANNHE	CTRL	10.5384	5.12695	-1.03948	0.000721596	yes
CADPS2	4:87522148-88100974	MANNHE	CTRL	3.87529	1.88703	-1.03819	0.000721596	yes
PVALB	5:75550902-75568048	MANNHE	CTRL	3.47982	1.69574	-1.0371	0.0228901	yes
KCNMA1	28:32824639-33588126	MANNHE	CTRL	0.604826	0.29484	-1.03659	0.00400408	yes
DOC2B	19:23041883-23067069	MANNHE	CTRL	2.44568	1.19279	-1.03589	0.00745196	yes
EPB42	10:38519451-38538842	MANNHE	CTRL	4.21924	2.06118	-1.03351	0.000721596	yes
CLEC4E	5:102158364-102168685	MANNHE	CTRL	4.99377	2.44197	-1.03208	0.00246199	yes
EMILIN1	11:72539295-72547260	MANNHE	CTRL	22.2338	10.8786	-1.03125	0.000721596	yes
CPT1C	18:56547747-56566825	MANNHE	CTRL	17.4341	8.53063	-1.03118	0.000721596	yes
IGFBP4	19:41326677-41338267	MANNHE	CTRL	181.196	88.6871	-1.03076	0.000721596	yes
PECAM1	19:49175890-49238414	MANNHE	CTRL	39.6148	19.3897	-1.03075	0.000721596	yes
SLC1A5	18:54302391-54313935	MANNHE	CTRL	50.3509	24.6749	-1.02897	0.000721596	yes
RBP4	26:14940550-14946750	MANNHE	CTRL	11.5942	5.68289	-1.02871	0.000721596	yes
WWTR1	1:119437951-119583580	MANNHE	CTRL	5.96029	2.92433	-1.02728	0.000721596	yes
MTUS1	27:18632851-18698059	MANNHE	CTRL	5.54287	2.72121	-1.02638	0.000721596	yes
GNPNAT1	10:11296786-11399972	MANNHE	CTRL	43.1543	21.1897	-1.02614	0.000721596	yes
PDE1B	5:25633160-25658534	MANNHE	CTRL	5.2783	2.59922	-1.02199	0.000721596	yes
NPL	16:65330450-65369037	MANNHE	CTRL	18.4175	9.07351	-1.02134	0.000721596	yes
MRC2	19:47689028-47748130	MANNHE	CTRL	2.89673	1.42788	-1.02055	0.000721596	yes
BTD	1:154337504-154416958	MANNHE	CTRL	8.42677	4.15504	-1.02012	0.0203765	yes
LOC782134	9:90836607-90852725	MANNHE	CTRL	6.57087	3.24278	-1.01885	0.00298038	yes
FAM108C1	21:27054891-27108983	MANNHE	CTRL	5.74605	2.83574	-1.01884	0.000721596	yes
PODN	3:93728449-93751305	MANNHE	CTRL	3.44108	1.69823	-1.01883	0.000721596	yes
SLC35C1	15:76725254-76732705	MANNHE	CTRL	11.5163	5.69133	-1.01684	0.000721596	yes
IGSF11	1:64357118-64488105	MANNHE	CTRL	1.75063	0.867509	-1.01292	0.00703581	yes
LOC100848910	7:54100659-54104198	MANNHE	CTRL	0.509006	0.252501	-1.01139	0.0246215	yes
RPN1	22:59952593-59965987	MANNHE	CTRL	233.002	115.628	-1.01085	0.000721596	yes
LOC515517	17:30032911-30073780	MANNHE	CTRL	5.36231	2.66115	-1.01081	0.000721596	yes
ITGA1	20:26116746-26234418	MANNHE	CTRL	6.98362	3.46849	-1.00967	0.000721596	yes
LOC788250	23:31654043-31654454	MANNHE	CTRL	6.9131	3.44106	-1.00648	0.0472439	yes
DPM3	3:15517157-15517733	MANNHE	CTRL	140.738	70.0759	-1.00602	0.000721596	yes
PTPRG	22:39174993-39502561	MANNHE	CTRL	1.29689	0.645858	-1.00576	0.00246199	yes
TPST2	17:68445519-68499477	MANNHE	CTRL	105.809	52.7361	-1.00459	0.000721596	yes
EMP2	25:9330657-9359612	MANNHE	CTRL	4.41032	2.19933	-1.00382	0.0222902	yes
PCOLCE2	1:127132776-127229654	MANNHE	CTRL	3.81935	1.90711	-1.00194	0.000721596	yes
SPATA20	19:36799920-36807919	MANNHE	CTRL	6.01947	3.00844	-1.00062	0.000721596	yes
TMTC1	5:80191842-80498478	MANNHE	CTRL	1.05227	0.526406	-0.999261	0.00246199	yes
SMAD1	17:12906375-12953417	MANNHE	CTRL	15.7943	7.90442	-0.99867	0.000721596	yes
MAD2	6:5536134-5566484	MANNHE	CTRL	9.24451	4.63217	-0.996908	0.000721596	yes
LOC789588	18:50584515-50611827	MANNHE	CTRL	3.44295	1.72674	-0.995592	0.00447872	yes
RASD2	5:74106328-74117624	MANNHE	CTRL	1.96005	0.9834	-0.995042	0.00193035	yes
ACTA2	26:10662362-10679648	MANNHE	CTRL	76.1849	38.2431	-0.994305	0.000721596	yes
SLC39A14	8:70186538-70237647	MANNHE	CTRL	17.407	8.7386	-0.994191	0.000721596	yes
QPRT	25:26747353-26762056	MANNHE	CTRL	1.7517	0.879643	-0.993768	0.0298003	yes
ABCA6	19:62027820-62093939	MANNHE	CTRL	7.17129	3.60167	-0.993567	0.000721596	yes
ADAM12	26:45848825-46238138	MANNHE	CTRL	3.58607	1.8012	-0.993449	0.000721596	yes
FKBP2	29:43159738-43162661	MANNHE	CTRL	180.465	90.7179	-0.992262	0.000721596	yes
STAB2	5:67612322-67784873	MANNHE	CTRL	18.1442	9.1229	-0.991944	0.000721596	yes
2005-09-01	17:74799509-74811262	MANNHE	CTRL	3.92264	1.9726	-0.991725	0.000721596	yes
LNP1	1:44332359-44371248	MANNHE	CTRL	6.3654	3.20138	-0.991557	0.000721596	yes
PDIA5	1:68012077-68101852	MANNHE	CTRL	44.9383	22.6066	-0.991204	0.000721596	yes
DNAJC6	3:80258490-80375749	MANNHE	CTRL	0.568979	0.286523	-0.989725	0.00868468	yes
CSPG4	21:33574739-33610470	MANNHE	CTRL	0.462785	0.233157	-0.989042	0.00660079	yes
ATOX1	7:64945747-64961110	MANNHE	CTRL	169.063	85.2479	-0.987821	0.000721596	yes
LOC100298891	12:71659808-71670786	MANNHE	CTRL	14.889	7.50837	-0.987678	0.000721596	yes
FKBP7	2:18413883-18421601	MANNHE	CTRL	14.5181	7.32161	-0.987618	0.000721596	yes
PKIA	14:43880468-43978275	MANNHE	CTRL	1.66581	0.840781	-0.986422	0.00786391	yes
IGSF10	1:117532035-117545609	MANNHE	CTRL	1.20466	0.608327	-0.985706	0.000721596	yes
C12H13orf15	12:11625777-11641054	MANNHE	CTRL	41.3871	20.9255	-0.983918	0.000721596	yes
RABAC1	18:51607793-51610671	MANNHE	CTRL	222.111	112.325	-0.983599	0.000721596	yes
LOC787081	3:98872615-99090207	MANNHE	CTRL	1.37245	0.695074	-0.98152	0.030683	yes
SOCS6	24:7303046-7304800	MANNHE	CTRL	2.52153	1.28032	-0.977787	0.0141683	yes
LOC505037	7:11439933-11494856	MANNHE	CTRL	7.14188	3.62851	-0.976928	0.000721596	yes
CRISPLD2	18:10985131-11050908	MANNHE	CTRL	7.91005	4.02768	-0.973738	0.000721596	yes
PALM3	7:12733953-12742933	MANNHE	CTRL	9.26658	4.71887	-0.973595	0.000721596	yes
SVEP1	8:101583430-101668233	MANNHE	CTRL	1.81026	0.921852	-0.973593	0.000721596	yes
RASL12	10:11930743-11959908	MANNHE	CTRL	1.65266	0.841677	-0.973455	0.0107181	yes
FKBP9	4:64209774-64252100	MANNHE	CTRL	9.40101	4.78798	-0.973398	0.000721596	yes
FJX1	15:66929567-66931383	MANNHE	CTRL	0.983482	0.500995	-0.973102	0.0472439	yes
ABCC9	5:88677585-88834493	MANNHE	CTRL	2.22756	1.13528	-0.972414	0.000721596	yes
RGS5	3:6228348-6426532	MANNHE	CTRL	13.8024	7.03748	-0.97179	0.000721596	yes
PLOD3	25:36057471-36065405	MANNHE	CTRL	32.6643	16.6555	-0.971719	0.000721596	yes
NPR1	3:16747640-16761172	MANNHE	CTRL	2.15701	1.09989	-0.971679	0.000721596	yes
SCD	26:21137944-21148317	MANNHE	CTRL	10.7347	5.47917	-0.970252	0.00193035	yes
PRRC1	7:27684800-27733587	MANNHE	CTRL	18.6723	9.53983	-0.968864	0.000721596	yes
LOC100302586	16:50553078-50556851	MANNHE	CTRL	3.81171	1.94835	-0.968186	0.00868468	yes
TPSB1	25:994574-996278	MANNHE	CTRL	3.25024	1.66332	-0.966482	0.0141683	yes
LOC781339	12:69574458-69576660	MANNHE	CTRL	19.24	9.8531	-0.965457	0.000721596	yes
FKTN	8:97035506-97073759	MANNHE	CTRL	2.71711	1.39278	-0.964103	0.00400408	yes
C1QTNF6	5:75992621-75999893	MANNHE	CTRL	32.7124	16.7735	-0.963651	0.000721596	yes
NID2	10:44894655-44986659	MANNHE	CTRL	8.64788	4.43776	-0.962515	0.000721596	yes
P4HA2	7:23480314-23513318	MANNHE	CTRL	14.4886	7.44425	-0.960717	0.000721596	yes
NOVA2	18:53874297-53889873	MANNHE	CTRL	1.40709	0.723416	-0.959819	0.0352791	yes
SLC12A8	1:70126991-70280058	MANNHE	CTRL	0.806185	0.414511	-0.959699	0.0289631	yes
ATP13A3	1:73677700-73732431	MANNHE	CTRL	33.7989	17.4058	-0.957406	0.000721596	yes
PARP16	10:12151278-12176608	MANNHE	CTRL	9.98101	5.14682	-0.955506	0.000721596	yes
COL5A3	7:15768627-15813561	MANNHE	CTRL	3.78386	1.95148	-0.955288	0.000721596	yes
TACC2	26:42407971-42546248	MANNHE	CTRL	0.692784	0.357337	-0.95512	0.0210614	yes
ARFGAP3	5:114291723-114341661	MANNHE	CTRL	42.2231	21.802	-0.953571	0.000721596	yes
SLAMF7	3:8969736-8985751	MANNHE	CTRL	112.208	57.9571	-0.953113	0.000721596	yes
EFHB	1:44647583-44712979	MANNHE	CTRL	7.55112	3.90957	-0.949679	0.000721596	yes
TMEM176A	4:114208684-114212313	MANNHE	CTRL	23.9703	12.4385	-0.946441	0.000721596	yes
TXNDC11	25:10427705-10487821	MANNHE	CTRL	84.7136	43.9613	-0.946359	0.000721596	yes
LOC534506	26:44047439-44081511	MANNHE	CTRL	24.4721	12.7021	-0.946065	0.000721596	yes
BAG2	23:2956931-2966980	MANNHE	CTRL	44.948	23.3709	-0.943544	0.000721596	yes
KCNJ8	5:88852392-88860011	MANNHE	CTRL	5.24016	2.72564	-0.943017	0.000721596	yes
NHSL2	X:83663265-83975166	MANNHE	CTRL	0.648696	0.337579	-0.942314	0.0252751	yes
MEG3	21:67377726-67395997	MANNHE	CTRL	2.95802	1.53967	-0.942016	0.00400408	yes
MAN1A2	3:25821098-25969358	MANNHE	CTRL	11.4375	5.95467	-0.941674	0.000721596	yes
FSTL1	1:65742625-65802423	MANNHE	CTRL	42.3042	22.0685	-0.93881	0.000721596	yes
MANSC1	5:97925814-97949863	MANNHE	CTRL	5.83379	3.0452	-0.937895	0.000721596	yes
TMED3	21:25993164-26004028	MANNHE	CTRL	54.3568	28.3745	-0.937866	0.000721596	yes
MOGS	11:10146800-10152097	MANNHE	CTRL	44.5176	23.2468	-0.937345	0.000721596	yes
GPR182	5:56773334-56775425	MANNHE	CTRL	15.0003	7.83441	-0.937092	0.000721596	yes
SULT1C4	9:34516800-34548809	MANNHE	CTRL	1.47778	0.772811	-0.93524	0.0457449	yes
DUSP5	26:31326749-31339518	MANNHE	CTRL	21.5748	11.2847	-0.93498	0.000721596	yes
CDC42EP5	18:63119866-63125184	MANNHE	CTRL	6.5729	3.44046	-0.933926	0.0157571	yes
CYP20A1	2:91899068-91943225	MANNHE	CTRL	29.3402	15.3612	-0.933593	0.000721596	yes
LRRC59	19:36915566-36927313	MANNHE	CTRL	76.5341	40.1006	-0.932479	0.000721596	yes
GNAO1	18:24339444-24519432	MANNHE	CTRL	4.41426	2.31402	-0.931772	0.00298038	yes
PTRF	19:43148012-43162165	MANNHE	CTRL	19.8456	10.4045	-0.931614	0.000721596	yes
MT1A	18:24106715-24108524	MANNHE	CTRL	17.7587	9.31514	-0.930874	0.0191947	yes
ANXA2	10:49860061-49904536	MANNHE	CTRL	170.824	89.6085	-0.930803	0.000721596	yes
MORC4	X:60057727-60121863	MANNHE	CTRL	1.19586	0.627632	-0.930061	0.00660079	yes
NUAK2	16:2894908-2914079	MANNHE	CTRL	11.4168	5.99869	-0.928438	0.000721596	yes
EMCN	6:25578633-25700218	MANNHE	CTRL	14.0153	7.36428	-0.928385	0.000721596	yes
SPG21	10:11853158-11873214	MANNHE	CTRL	58.732	30.8702	-0.927929	0.000721596	yes
MADCAM1	7:44773997-44778672	MANNHE	CTRL	10.7196	5.63891	-0.926758	0.000721596	yes
ANGPTL2	11:97780156-97975506	MANNHE	CTRL	4.42392	2.32945	-0.925333	0.00298038	yes
DERL3	17:73241608-73243689	MANNHE	CTRL	196.789	103.886	-0.921647	0.000721596	yes
ALG5	12:24719247-24745366	MANNHE	CTRL	44.0474	23.2774	-0.920127	0.000721596	yes
EGFL7	11:104128897-104133541	MANNHE	CTRL	45.8265	24.2203	-0.919968	0.000721596	yes
STT3A	29:29374420-29395600	MANNHE	CTRL	132.279	70.017	-0.917808	0.000721596	yes
TSPAN13	4:25213087-25251241	MANNHE	CTRL	106.304	56.2807	-0.917485	0.000721596	yes
LOC100336084	23:25481701-25490244	MANNHE	CTRL	60.3877	31.9751	-0.917305	0.00246199	yes
SLC22A3	9:97917318-98015994	MANNHE	CTRL	5.20769	2.7576	-0.917229	0.000721596	yes
C19H17orf96	19:39912108-39913248	MANNHE	CTRL	2.24336	1.18839	-0.916649	0.0426246	yes
ZBTB32	18:46616258-46619888	MANNHE	CTRL	24.3973	12.9282	-0.916204	0.000721596	yes
LAMA4	9:38783446-38811230	MANNHE	CTRL	10.8768	5.76386	-0.916152	0.000721596	yes
CHPF	2:108191927-108197357	MANNHE	CTRL	28.3845	15.0429	-0.916025	0.000721596	yes
MMRN2	28:41886155-41901491	MANNHE	CTRL	2.56518	1.35989	-0.915564	0.00135308	yes
SELP	16:38049257-38080859	MANNHE	CTRL	6.39957	3.39495	-0.914584	0.000721596	yes
EDNRA	17:10752465-10828318	MANNHE	CTRL	3.06693	1.63095	-0.91108	0.000721596	yes
HOXB2	19:38583392-38585653	MANNHE	CTRL	2.89353	1.53954	-0.91033	0.0129883	yes
CYYR1	1:9242707-9360374	MANNHE	CTRL	6.32013	3.36298	-0.910213	0.000721596	yes
MLEC	17:65184867-65194880	MANNHE	CTRL	50.5987	26.9242	-0.910194	0.000721596	yes
LOC100848375	11:816138-878724	MANNHE	CTRL	55.4411	29.508	-0.909851	0.000721596	yes
EPAS1	11:28576238-28755962	MANNHE	CTRL	21.6401	11.5205	-0.90951	0.000721596	yes
SORBS2	27:14906478-15022818	MANNHE	CTRL	1.71045	0.910912	-0.908992	0.0114973	yes
DNAJC25	8:102759000-102776541	MANNHE	CTRL	26.2966	14.0145	-0.907953	0.000721596	yes
HEYL	3:107032467-107047976	MANNHE	CTRL	4.91111	2.61778	-0.907708	0.000721596	yes
GADD45A	3:77972151-77975240	MANNHE	CTRL	71.2528	38.0176	-0.906278	0.000721596	yes
ERLEC1	11:36371086-36395686	MANNHE	CTRL	40.5804	21.6558	-0.90603	0.000721596	yes
RASGRP4	18:48481120-48494788	MANNHE	CTRL	11.2421	6.00584	-0.904468	0.000721596	yes
SLC35B1	19:37546940-37553770	MANNHE	CTRL	97.777	52.2394	-0.904357	0.000721596	yes
TFRC	1:71259941-71287252	MANNHE	CTRL	24.1181	12.8927	-0.903562	0.000721596	yes
NDUFAF2	20:18371754-18371920	MANNHE	CTRL	13.3449	7.14049	-0.902195	0.0145064	yes
REXO2	15:25293298-25304052	MANNHE	CTRL	68.7363	36.7896	-0.901775	0.000721596	yes
GALE	2:129707280-129711871	MANNHE	CTRL	20.3209	10.8792	-0.901392	0.000721596	yes
LIMD1	22:54259647-54337446	MANNHE	CTRL	22.2957	11.9538	-0.899297	0.000721596	yes
PLS3	X:71709927-71806534	MANNHE	CTRL	7.70603	4.13289	-0.898836	0.000721596	yes
SNAI1	13:78766067-78772194	MANNHE	CTRL	2.68237	1.43999	-0.897446	0.0118757	yes
EPOR	7:16998237-17003707	MANNHE	CTRL	1.37356	0.737511	-0.897187	0.0452589	yes
CACHD1	3:81118833-81353429	MANNHE	CTRL	0.686572	0.368871	-0.896296	0.0129883	yes
THBS1	10:35314024-35329297	MANNHE	CTRL	23.2023	12.4829	-0.894318	0.000721596	yes
FAH	21:26610000-26643315	MANNHE	CTRL	4.30951	2.31982	-0.893513	0.00492261	yes
CCL16	19:14781917-14786966	MANNHE	CTRL	10.965	5.90335	-0.893302	0.000721596	yes
PMP22	19:33357139-33382707	MANNHE	CTRL	3.42693	1.8464	-0.892202	0.00447872	yes
LOC100337486	21:70311856-70351845	MANNHE	CTRL	0.661888	0.356805	-0.89145	0.0103108	yes
CD34	16:77367521-77390475	MANNHE	CTRL	20.1028	10.8452	-0.890337	0.000721596	yes
SEMA3G	22:48999624-49008503	MANNHE	CTRL	1.24219	0.670166	-0.890298	0.0415535	yes
LAMA5	13:55379921-55432867	MANNHE	CTRL	3.35461	1.81022	-0.889983	0.000721596	yes
RPP25	21:34144135-34145564	MANNHE	CTRL	5.11314	2.7607	-0.889178	0.00447872	yes
KDELR1	18:55523302-55534438	MANNHE	CTRL	80.6533	43.6405	-0.886066	0.000721596	yes
PNPLA4	X:146050000-146099080	MANNHE	CTRL	5.54806	3.00746	-0.88344	0.0151595	yes
STX1A	25:34053828-34071558	MANNHE	CTRL	1.49357	0.809725	-0.883265	0.0252751	yes
SLC36A4	29:1681309-1719272	MANNHE	CTRL	2.62107	1.42627	-0.877908	0.0154114	yes
PGM3	9:23358370-23384788	MANNHE	CTRL	14.924	8.12293	-0.877558	0.000721596	yes
LOC100138613	1:136636385-136676833	MANNHE	CTRL	69.3109	37.8303	-0.873538	0.000721596	yes
RAB3D	7:16961022-16970091	MANNHE	CTRL	7.252	3.96272	-0.871887	0.000721596	yes
TMEM45A	1:45281233-45394340	MANNHE	CTRL	4.38772	2.39774	-0.871798	0.00703581	yes
COL6A1	1:147404395-147423644	MANNHE	CTRL	44.2653	24.1954	-0.871442	0.000721596	yes
HERPUD1	18:25048490-25059258	MANNHE	CTRL	168.608	92.2508	-0.870037	0.000721596	yes
ESAM	29:28601859-28610589	MANNHE	CTRL	5.69198	3.11566	-0.869392	0.00246199	yes
ITGA6	2:24131485-24217715	MANNHE	CTRL	26.3625	14.5009	-0.862342	0.000721596	yes
FCN2	11:106823025-106831643	MANNHE	CTRL	259.19	142.612	-0.861919	0.000721596	yes
SFXN3	26:21731745-21738757	MANNHE	CTRL	7.13809	3.92783	-0.861806	0.000721596	yes
LOC100294726	7:70448105-70481860	MANNHE	CTRL	5.53127	3.04393	-0.861678	0.00298038	yes
RGNEF	20:7603232-7740417	MANNHE	CTRL	0.412337	0.227052	-0.8608	0.0491377	yes
UCK2	3:3045780-3119590	MANNHE	CTRL	47.0175	25.9306	-0.858542	0.000721596	yes
LINGO1	21:33291475-33310122	MANNHE	CTRL	1.19281	0.658612	-0.856867	0.0240618	yes
PDXK	1:146490838-146516811	MANNHE	CTRL	39.6679	21.9202	-0.855712	0.000721596	yes
CLIC4	2:128710444-128783921	MANNHE	CTRL	34.491	19.0647	-0.855321	0.000721596	yes
SERPINH1	15:55514944-55525178	MANNHE	CTRL	83.3673	46.1043	-0.854582	0.000721596	yes
MAP1B	20:9325945-9419062	MANNHE	CTRL	1.72351	0.954238	-0.852926	0.000721596	yes
RCN2	21:32577839-32595997	MANNHE	CTRL	86.4586	47.8727	-0.852806	0.000721596	yes
EFEMP1	11:38338745-38408288	MANNHE	CTRL	13.3616	7.4048	-0.851562	0.000721596	yes
GPR153	16:47942385-47949761	MANNHE	CTRL	1.67875	0.93125	-0.850146	0.00911938	yes
MUC13	1:69934406-69959162	MANNHE	CTRL	2.06652	1.14653	-0.849928	0.0151595	yes
TRAM1	14:36385094-36417387	MANNHE	CTRL	152.514	84.7234	-0.848113	0.000721596	yes
ST6GALNAC4	11:98585647-98594176	MANNHE	CTRL	103.987	57.7767	-0.847842	0.000721596	yes
HES2	16:47798008-47800503	MANNHE	CTRL	2.96904	1.65019	-0.847361	0.00826171	yes
IMPDH1	4:93382311-93399661	MANNHE	CTRL	44.3495	24.6498	-0.847342	0.000721596	yes
CCND2	5:106253890-106276819	MANNHE	CTRL	100.623	55.9358	-0.84712	0.000721596	yes
LOC786948	25:987386-989242	MANNHE	CTRL	5.43517	3.02264	-0.846516	0.0181914	yes
NR5A2	16:80751685-80879974	MANNHE	CTRL	1.46581	0.81575	-0.845495	0.00534264	yes
HSPA13	1:22290119-22300233	MANNHE	CTRL	31.7495	17.6832	-0.844357	0.000721596	yes
THBS3	3:15470301-15480445	MANNHE	CTRL	1.73859	0.969439	-0.842696	0.0129883	yes
IL13RA1	X:3040190-3100688	MANNHE	CTRL	13.4958	7.52752	-0.842265	0.000721596	yes
CYCS	4:71186305-71189109	MANNHE	CTRL	52.6727	29.4177	-0.840374	0.000721596	yes
LOC100337213	7:10817301-10830303	MANNHE	CTRL	4.43706	2.4784	-0.840195	0.0317565	yes
ST7	4:51479796-51748629	MANNHE	CTRL	6.9297	3.87676	-0.837941	0.000721596	yes
LOC100336675	15:53582240-53587691	MANNHE	CTRL	1.64952	0.923159	-0.837396	0.0107181	yes
LOC100849061	13:43153859-43156513	MANNHE	CTRL	26.6645	14.9346	-0.836261	0.00351112	yes
LOC100848941	21:2129899-2165913	MANNHE	CTRL	49.1856	27.5776	-0.834741	0.000721596	yes
ENG	11:98491907-98541363	MANNHE	CTRL	31.2237	17.5103	-0.834436	0.0228901	yes
ENTPD7	26:20492355-20524924	MANNHE	CTRL	8.41469	4.72001	-0.83412	0.000721596	yes
LOC615144	19:44782787-44792887	MANNHE	CTRL	1.90924	1.07386	-0.830194	0.01887	yes
GNG11	4:11074736-11079756	MANNHE	CTRL	29.5944	16.6518	-0.829651	0.000721596	yes
CNPY2	5:57354891-57357904	MANNHE	CTRL	90.2321	50.7848	-0.829244	0.000721596	yes
HDLBP	3:120904276-120960976	MANNHE	CTRL	85.0224	47.9144	-0.827383	0.000721596	yes
MEOX1	19:44170622-44189299	MANNHE	CTRL	6.9612	3.9304	-0.824659	0.000721596	yes
FZD10	17:47935473-47937432	MANNHE	CTRL	1.6454	0.929086	-0.824554	0.041004	yes
TMEM2	8:48223035-48303993	MANNHE	CTRL	33.9294	19.1902	-0.822163	0.000721596	yes
MRGPRF	29:47009942-47019518	MANNHE	CTRL	3.9121	2.21379	-0.821428	0.00577637	yes
GFPT1	11:67684389-67740412	MANNHE	CTRL	9.43458	5.34026	-0.82105	0.000721596	yes
F2RL1	10:7956083-7965803	MANNHE	CTRL	3.19847	1.81048	-0.821012	0.00786391	yes
CPEB3	26:13613120-13763563	MANNHE	CTRL	1.95369	1.10622	-0.820563	0.000721596	yes
PDLIM1	26:16605967-16646598	MANNHE	CTRL	21.8505	12.375	-0.820235	0.000721596	yes
FUT7	11:106201877-106203263	MANNHE	CTRL	7.30263	4.13865	-0.819256	0.00492261	yes
DNA2	28:24966716-25004024	MANNHE	CTRL	3.65958	2.07442	-0.818973	0.00193035	yes
NUS1	9:33570517-33571229	MANNHE	CTRL	14.4292	8.18319	-0.81826	0.00745196	yes
FAR2	5:80665378-80721457	MANNHE	CTRL	1.62137	0.920113	-0.817333	0.0118757	yes
GJC1	19:45154664-45186611	MANNHE	CTRL	1.46941	0.834173	-0.816814	0.043146	yes
S100A16	3:16830510-16837422	MANNHE	CTRL	31.2468	17.7419	-0.816545	0.000721596	yes
CCL20	2:116759407-116762490	MANNHE	CTRL	21.7897	12.3784	-0.815826	0.0287282	yes
RGMB	7:100424424-100446937	MANNHE	CTRL	2.88215	1.6387	-0.81459	0.0126481	yes
PTPRD	8:36342558-36800975	MANNHE	CTRL	0.897946	0.510742	-0.814033	0.00703581	yes
TMED2	17:54330420-54338333	MANNHE	CTRL	197.332	112.275	-0.813588	0.000721596	yes
KDELC1	12:83003047-83016227	MANNHE	CTRL	10.4255	5.93173	-0.813586	0.000721596	yes
ELOVL6	6:16376641-16510244	MANNHE	CTRL	8.5322	4.85485	-0.813492	0.000721596	yes
ADAMTS2	7:1956351-2165242	MANNHE	CTRL	3.88136	2.20951	-0.812837	0.000721596	yes
C3	7:18989626-19025593	MANNHE	CTRL	16.0936	9.16542	-0.812213	0.000721596	yes
OSTC	6:17789595-17801277	MANNHE	CTRL	163.79	93.3414	-0.811258	0.000721596	yes
AFAP1L1	7:62661627-62736436	MANNHE	CTRL	3.54701	2.02162	-0.811087	0.00193035	yes
HM13	13:61644663-61683597	MANNHE	CTRL	140.428	80.1066	-0.809833	0.000721596	yes
SIRPA	13:53668953-53710782	MANNHE	CTRL	58.1445	33.1784	-0.809401	0.000721596	yes
SLC6A4	19:21851878-21872423	MANNHE	CTRL	2.40009	1.36963	-0.809304	0.00950032	yes
SRXN1	13:60944182-60951049	MANNHE	CTRL	3.48217	1.99001	-0.807214	0.00534264	yes
LOC404103	13:74930435-75008385	MANNHE	CTRL	25.6345	14.6753	-0.8047	0.000721596	yes
TMEM236	13:32475703-32515628	MANNHE	CTRL	1.54788	0.887411	-0.80262	0.0328844	yes
GPIHBP1	14:2550268-2552230	MANNHE	CTRL	10.5825	6.06806	-0.802374	0.0151595	yes
SNED1	3:120742626-120804428	MANNHE	CTRL	0.946179	0.542777	-0.801754	0.0185216	yes
PRRX1	16:39016046-39091107	MANNHE	CTRL	5.31206	3.04782	-0.801493	0.0231682	yes
ECM1	3:20228527-20233933	MANNHE	CTRL	9.44189	5.41987	-0.800818	0.000721596	yes
LOC100300483	11:49060225-49062854	MANNHE	CTRL	11.6769	6.70985	-0.799305	0.0168208	yes
RASIP1	18:55810632-55824241	MANNHE	CTRL	9.80472	5.63494	-0.799076	0.000721596	yes
LOC783891	9:96977713-97006057	MANNHE	CTRL	2.83964	1.63219	-0.798904	0.00135308	yes
CRIP2	21:71365857-71382666	MANNHE	CTRL	46.3362	26.7166	-0.7944	0.000721596	yes
TCF4	24:55056408-55161459	MANNHE	CTRL	33.1139	19.0931	-0.794382	0.000721596	yes
RAB3IL1	29:41112113-41130629	MANNHE	CTRL	17.756	10.2386	-0.794288	0.000721596	yes
HEG1	1:70026905-70106394	MANNHE	CTRL	7.95356	4.59114	-0.792749	0.000721596	yes
PDE3A	5:89554511-89917359	MANNHE	CTRL	0.871066	0.503075	-0.79201	0.0482283	yes
DAB2IP	11:92577650-92665481	MANNHE	CTRL	2.67569	1.54609	-0.791285	0.00135308	yes
BMP6	23:47353876-47510231	MANNHE	CTRL	3.16848	1.8309	-0.791237	0.00246199	yes
SRM	16:43445482-43449541	MANNHE	CTRL	85.9413	49.7233	-0.789431	0.000721596	yes
MAGEH1	X:98101929-98103366	MANNHE	CTRL	26.71	15.4644	-0.788427	0.000721596	yes
OLFML3	3:29506173-29509176	MANNHE	CTRL	11.8426	6.86032	-0.787644	0.000721596	yes
CLEC3B	22:54791196-54807471	MANNHE	CTRL	65.3261	37.8478	-0.78745	0.000721596	yes
AMIGO3	22:51054913-51078183	MANNHE	CTRL	33.9395	19.673	-0.78675	0.0258838	yes
DNAH7	2:84773342-85028058	MANNHE	CTRL	1.31179	0.761802	-0.784048	0.000721596	yes
SOCS3	19:54458855-54459555	MANNHE	CTRL	62.4922	36.3102	-0.783302	0.000721596	yes
PTPRB	5:43113409-43240577	MANNHE	CTRL	2.27177	1.32289	-0.780126	0.000721596	yes
FKBP4	5:107445595-107453517	MANNHE	CTRL	134.127	78.1095	-0.780026	0.000721596	yes
PLOD1	16:42594655-42625798	MANNHE	CTRL	17.8797	10.4144	-0.779742	0.000721596	yes
HSPB6	18:46654239-46656762	MANNHE	CTRL	10.272	5.98931	-0.778248	0.00246199	yes
PDE4DIP	3:22967139-22995441	MANNHE	CTRL	18.2859	10.6633	-0.778081	0.000721596	yes
CDR2	25:20218555-20247294	MANNHE	CTRL	5.75185	3.35426	-0.778033	0.00135308	yes
DCBLD1	9:33690644-33764358	MANNHE	CTRL	1.75053	1.02205	-0.776328	0.0210614	yes
LOC511937	14:43743183-43744285	MANNHE	CTRL	16.5815	9.6812	-0.776317	0.00135308	yes
ERP29	17:64419025-64426503	MANNHE	CTRL	237.024	138.405	-0.776133	0.000721596	yes
SELK	22:47582814-47590574	MANNHE	CTRL	123.261	72.0889	-0.773864	0.000721596	yes
JMY	10:10242750-10313055	MANNHE	CTRL	3.39591	1.98627	-0.773739	0.00135308	yes
GPR124	27:32774354-32799014	MANNHE	CTRL	5.06546	2.96371	-0.773288	0.0228901	yes
TMEM44	1:73516015-73559862	MANNHE	CTRL	2.17421	1.27212	-0.773256	0.0261127	yes
MMP14	10:21806053-21814533	MANNHE	CTRL	36.9477	21.6191	-0.773177	0.000721596	yes
SLC6A17	3:33337765-33373481	MANNHE	CTRL	2.10161	1.23024	-0.772559	0.0258838	yes
HSPH1	12:29820753-29844227	MANNHE	CTRL	59.5221	34.8998	-0.770206	0.000721596	yes
SMTN	17:72028545-72064314	MANNHE	CTRL	10.3515	6.07075	-0.769895	0.000721596	yes
ABHD11	25:34041447-34043850	MANNHE	CTRL	22.2143	13.0406	-0.768473	0.000721596	yes
CALCRL	2:8901431-9030990	MANNHE	CTRL	6.09996	3.58193	-0.768062	0.000721596	yes
PODXL	4:96030427-96078242	MANNHE	CTRL	4.52224	2.65869	-0.766321	0.0175317	yes
ENTPD2	11:106183597-106189097	MANNHE	CTRL	6.863	4.03507	-0.766246	0.00351112	yes
SLC16A7	5:53987894-54214799	MANNHE	CTRL	1.53308	0.901483	-0.766066	0.034492	yes
ATP8B1	24:57380075-57487773	MANNHE	CTRL	1.07398	0.63224	-0.764429	0.0237661	yes
ARHGEF15	19:28541732-28550394	MANNHE	CTRL	3.11039	1.83122	-0.764294	0.00577637	yes
H19	29:50150774-50153147	MANNHE	CTRL	67.718	39.8875	-0.763603	0.000721596	yes
SERP1	1:118537062-118539347	MANNHE	CTRL	344.647	203.206	-0.762171	0.000721596	yes
JAG2	21:71144434-71157066	MANNHE	CTRL	1.97376	1.16385	-0.762042	0.0118757	yes
MSX1	6:106061473-106065746	MANNHE	CTRL	1.86476	1.10103	-0.760135	0.0475014	yes
METRNL	19:50243526-50258688	MANNHE	CTRL	19.9133	11.7619	-0.759605	0.000721596	yes
CALU	4:93532936-93554974	MANNHE	CTRL	44.2422	26.1385	-0.759246	0.000721596	yes
LOC100295019	7:112060682-112288435	MANNHE	CTRL	2.66551	1.57509	-0.758976	0.0157571	yes
SSR4	X:39925627-39929382	MANNHE	CTRL	1318.7	779.705	-0.758114	0.000721596	yes
CAPG	11:49423730-49438680	MANNHE	CTRL	24.4112	14.4339	-0.75808	0.000721596	yes
CLPB	15:52661472-52804186	MANNHE	CTRL	8.82176	5.22027	-0.756943	0.000721596	yes
LOC100337244	12:74550305-74760765	MANNHE	CTRL	3.60986	2.13684	-0.756464	0.00534264	yes
MYH10	19:28680826-28800880	MANNHE	CTRL	4.54907	2.69424	-0.755696	0.000721596	yes
BST1	6:115687861-115716694	MANNHE	CTRL	5.02462	2.97707	-0.755119	0.0368375	yes
ANKRD50	17:33496004-33532252	MANNHE	CTRL	1.07058	0.634379	-0.754979	0.01887	yes
HIST1H1D	23:31490461-31494119	MANNHE	CTRL	7.38503	4.37917	-0.753945	0.000721596	yes
SCRN3	2:22400871-22432815	MANNHE	CTRL	7.57842	4.49388	-0.753936	0.00135308	yes
RNF144A	11:89874985-89908855	MANNHE	CTRL	18.3388	10.875	-0.75389	0.00193035	yes
LOC539953	16:73315257-73364134	MANNHE	CTRL	8.73507	5.18192	-0.753331	0.000721596	yes
FHL3	3:108547856-108555477	MANNHE	CTRL	7.58782	4.50185	-0.753168	0.00577637	yes
NFATC4	10:20632350-20642260	MANNHE	CTRL	3.04411	1.80647	-0.752846	0.00492261	yes
ANKRD28	1:154440390-154575201	MANNHE	CTRL	13.8129	8.19942	-0.752421	0.000721596	yes
GATM	10:65325341-65341356	MANNHE	CTRL	2.02293	1.2012	-0.751971	0.0277113	yes
HSPA1A	23:27331771-27333870	MANNHE	CTRL	428.783	254.639	-0.751793	0.0107181	yes
PTPLAD2	8:23339676-23369119	MANNHE	CTRL	16.1223	9.58122	-0.750776	0.000721596	yes
BACE2	1:142875108-142980631	MANNHE	CTRL	6.21755	3.6951	-0.750731	0.00351112	yes
LOC100139916	25:2504673-2508933	MANNHE	CTRL	193.197	114.836	-0.750499	0.000721596	yes
PPP1R3B	27:24314781-24323720	MANNHE	CTRL	5.25728	3.1256	-0.750181	0.00534264	yes
SLC31A1	8:104172061-104206276	MANNHE	CTRL	23.3753	13.8983	-0.750075	0.000721596	yes
ASS1	11:100791338-100843337	MANNHE	CTRL	3.81731	2.27466	-0.746905	0.0242926	yes
SLIT2	6:41236269-41641095	MANNHE	CTRL	0.99207	0.59147	-0.746137	0.019495	yes
NOL3	18:34928331-34931933	MANNHE	CTRL	9.4069	5.6106	-0.745564	0.0160992	yes
GNE	8:60869652-60903591	MANNHE	CTRL	31.2279	18.6438	-0.744138	0.000721596	yes
NOS3	4:114375966-114394483	MANNHE	CTRL	3.04937	1.82194	-0.743034	0.00298038	yes
PVR	18:52760785-52841330	MANNHE	CTRL	6.78812	4.0569	-0.742635	0.00135308	yes
ITPRIPL2	25:16974399-16976065	MANNHE	CTRL	9.79799	5.85707	-0.742306	0.00246199	yes
RBM47	6:61034008-61311429	MANNHE	CTRL	15.0149	8.97698	-0.742095	0.000721596	yes
COL12A1	9:14868629-14983763	MANNHE	CTRL	8.99465	5.37944	-0.741611	0.000721596	yes
BMPER	4:63052080-63305357	MANNHE	CTRL	5.35913	3.20908	-0.73984	0.000721596	yes
KRTCAP2	3:15498951-15501491	MANNHE	CTRL	134.764	80.7371	-0.739135	0.000721596	yes
DGAT2	15:55940756-55973229	MANNHE	CTRL	6.76255	4.05515	-0.737812	0.00534264	yes
SLC30A7	3:42465563-42559234	MANNHE	CTRL	22.515	13.5051	-0.737377	0.000721596	yes
NDST1	7:63816087-63900637	MANNHE	CTRL	16.1821	9.70937	-0.736948	0.000721596	yes
LOC100847940	29:44278779-44282121	MANNHE	CTRL	963.664	578.456	-0.736322	0.0185216	yes
COL6A2	1:147542824-147570738	MANNHE	CTRL	20.1022	12.0785	-0.734918	0.000721596	yes
GPT2	18:15370926-15405215	MANNHE	CTRL	7.88237	4.74029	-0.733653	0.000721596	yes
MTDH	14:68799570-68853740	MANNHE	CTRL	98.4661	59.2168	-0.733621	0.000721596	yes
LMO7	12:51141567-51245847	MANNHE	CTRL	0.817286	0.491634	-0.733256	0.0282238	yes
DKK3	15:41241521-41291992	MANNHE	CTRL	6.65085	4.00479	-0.731813	0.000721596	yes
GMPPA	2:108153425-108160405	MANNHE	CTRL	55.6787	33.5279	-0.731765	0.000721596	yes
EPHB4	25:36347293-36400930	MANNHE	CTRL	5.59916	3.3725	-0.73139	0.00786391	yes
ADA	13:73750478-73773897	MANNHE	CTRL	198.055	119.31	-0.731189	0.000721596	yes
FZD6	14:63357677-63392777	MANNHE	CTRL	3.84943	2.32177	-0.729421	0.00193035	yes
ABCA9	19:62099289-62151590	MANNHE	CTRL	1.03317	0.623976	-0.727511	0.0213665	yes
LOC100137759	29:51291087-51309821	MANNHE	CTRL	1.60837	0.972241	-0.726214	0.0454824	yes
POLE2	10:42715366-42747213	MANNHE	CTRL	14.0794	8.51704	-0.725166	0.000721596	yes
SELS	21:5385097-5394275	MANNHE	CTRL	79.325	48.0272	-0.723924	0.000721596	yes
PKP4	2:37814941-37929695	MANNHE	CTRL	4.70903	2.85179	-0.723561	0.000721596	yes
ATP8B2	3:16268555-16288132	MANNHE	CTRL	89.2173	54.034	-0.723457	0.000721596	yes
CCNE1	18:40565285-40575333	MANNHE	CTRL	20.5286	12.4426	-0.722348	0.000721596	yes
TSHZ2	13:81600996-81604203	MANNHE	CTRL	1.8864	1.14402	-0.721521	0.0225854	yes
UFM1	12:23685100-23717494	MANNHE	CTRL	42.434	25.7458	-0.720885	0.000721596	yes
GNLY	11:49095461-49096945	MANNHE	CTRL	21.639	13.1378	-0.719914	0.0242926	yes
PPAP2B	3:90185368-90272886	MANNHE	CTRL	10.3315	6.27291	-0.719851	0.00298038	yes
TMEM88	19:28156791-28157771	MANNHE	CTRL	8.58722	5.21674	-0.719044	0.0261127	yes
ATF6	3:7613748-7843427	MANNHE	CTRL	12.6146	7.66649	-0.718459	0.000721596	yes
ADAM15	3:15593180-15603336	MANNHE	CTRL	7.63886	4.64694	-0.717077	0.000721596	yes
CALD1	4:99475014-99580189	MANNHE	CTRL	37.0289	22.5319	-0.716682	0.000721596	yes
SH3PXD2B	20:4009595-4096595	MANNHE	CTRL	1.79613	1.09342	-0.716048	0.0197488	yes
CADM4	18:52178089-52183900	MANNHE	CTRL	5.15529	3.13959	-0.71548	0.00993052	yes
ARSK	7:97276412-97331363	MANNHE	CTRL	2.61798	1.59469	-0.715183	0.0415535	yes
ENAH	16:29236032-29442778	MANNHE	CTRL	7.30945	4.45249	-0.715151	0.000721596	yes
ITGA8	13:30340140-30527982	MANNHE	CTRL	0.9236	0.562721	-0.714847	0.0426246	yes
PSPH	25:27955046-27977149	MANNHE	CTRL	27.7469	16.9096	-0.714483	0.000721596	yes
RPN2	13:66758822-66853781	MANNHE	CTRL	171.877	104.779	-0.714027	0.000721596	yes
FADS1	29:40938864-40952991	MANNHE	CTRL	14.1992	8.66027	-0.71333	0.000721596	yes
TFPI2	4:11035473-11039782	MANNHE	CTRL	5.95872	3.64364	-0.709623	0.0171825	yes
UAP1	3:6900265-6932034	MANNHE	CTRL	49.4585	30.2437	-0.709583	0.000721596	yes
IL6R	3:16179332-16231747	MANNHE	CTRL	66.3521	40.6058	-0.708456	0.000721596	yes
AEBP1	4:77881912-77891706	MANNHE	CTRL	26.767	16.3998	-0.706778	0.000721596	yes
ATG4A	X:61017761-61050945	MANNHE	CTRL	8.01094	4.9087	-0.706631	0.0118757	yes
APCDD1	24:42578579-42599032	MANNHE	CTRL	2.03121	1.24675	-0.704162	0.0284911	yes
STAM	13:32390174-32445158	MANNHE	CTRL	10.2785	6.30972	-0.703981	0.000721596	yes
SHMT2	5:56537020-56544574	MANNHE	CTRL	103.104	63.3258	-0.703239	0.000721596	yes
WFS1	6:104672732-104696495	MANNHE	CTRL	5.71367	3.51115	-0.702474	0.000721596	yes
UGGT1	2:4226353-4333329	MANNHE	CTRL	15.989	9.82689	-0.702274	0.000721596	yes
FLT4	7:403269-443552	MANNHE	CTRL	6.11216	3.75772	-0.701824	0.000721596	yes
HK2	11:9722024-9791267	MANNHE	CTRL	8.24503	5.07561	-0.699941	0.000721596	yes
CRTAP	22:7532376-7565773	MANNHE	CTRL	12.5001	7.69685	-0.699604	0.000721596	yes
MYO7A	15:57329071-57526489	MANNHE	CTRL	1.64393	1.01229	-0.699528	0.00619986	yes
SHE	3:16143798-16162186	MANNHE	CTRL	1.99277	1.22756	-0.698981	0.0304146	yes
OSMR	20:35518581-35674520	MANNHE	CTRL	33.3262	20.5333	-0.698689	0.000721596	yes
TMEM214	11:72582293-72590668	MANNHE	CTRL	85.628	52.7596	-0.698649	0.000721596	yes
LHFP	12:22817677-23026892	MANNHE	CTRL	4.44291	2.7464	-0.693962	0.0337098	yes
AACS	17:52974077-53027510	MANNHE	CTRL	16.5485	10.2387	-0.692678	0.000721596	yes
ERGIC1	20:4505274-4618418	MANNHE	CTRL	75.1043	46.4908	-0.691951	0.000721596	yes
HTRA1	26:42659746-42717176	MANNHE	CTRL	33.9349	21.0082	-0.691816	0.000721596	yes
FAM3C	4:86620364-86674480	MANNHE	CTRL	35.4918	21.9769	-0.691502	0.000721596	yes
PLP2	X:92294751-92297791	MANNHE	CTRL	97.5809	60.4532	-0.69078	0.000721596	yes
MGC137708	18:57317702-57324191	MANNHE	CTRL	14.4644	8.96659	-0.689879	0.000721596	yes
SEC63	9:42651149-42718789	MANNHE	CTRL	36.4124	22.6309	-0.686137	0.000721596	yes
EMR1	7:18763198-18823651	MANNHE	CTRL	49.9623	31.0795	-0.684877	0.000721596	yes
EHD4	10:37412299-37496211	MANNHE	CTRL	4.99515	3.10772	-0.684672	0.00950032	yes
CALR	7:13731957-13735788	MANNHE	CTRL	616.547	383.705	-0.684214	0.00135308	yes
FERMT2	10:65766162-65843942	MANNHE	CTRL	8.19842	5.10256	-0.684123	0.00135308	yes
SLIT3	20:324336-1051861	MANNHE	CTRL	2.60158	1.61943	-0.683907	0.00826171	yes
JAM3	29:33546269-33577319	MANNHE	CTRL	5.74923	3.5811	-0.682965	0.00135308	yes
TMED7	10:4409110-4418520	MANNHE	CTRL	72.5086	45.1731	-0.682688	0.000721596	yes
SEC61G	22:1445066-1451957	MANNHE	CTRL	411.313	256.298	-0.682415	0.000721596	yes
LOC514750	7:63064801-63182560	MANNHE	CTRL	1.95893	1.22077	-0.682281	0.0309649	yes
DCLRE1A	26:34559811-34583009	MANNHE	CTRL	17.718	11.0848	-0.67663	0.000721596	yes
SLC16A1	3:30533844-30563304	MANNHE	CTRL	15.8635	9.94663	-0.673431	0.000721596	yes
SEC23B	13:38870265-38900352	MANNHE	CTRL	60.146	37.7388	-0.672422	0.000721596	yes
FABP3	2:122723224-122783830	MANNHE	CTRL	213.366	133.989	-0.671216	0.000721596	yes
TJP2	8:45598158-45696888	MANNHE	CTRL	2.0475	1.28592	-0.671062	0.0242926	yes
NFAM1	5:113843641-113882269	MANNHE	CTRL	6.62799	4.1637	-0.670705	0.0240618	yes
PTPRM	24:40768695-41437426	MANNHE	CTRL	7.66252	4.81675	-0.669759	0.000721596	yes
CCDC41	5:24226911-24309153	MANNHE	CTRL	11.0329	6.93892	-0.669028	0.000721596	yes
SPCS2	15:54998950-55023266	MANNHE	CTRL	190.902	120.089	-0.668727	0.000721596	yes
CCPG1	10:54989165-55111723	MANNHE	CTRL	28.6351	18.0135	-0.668708	0.00193035	yes
LOC100337216	12:74293958-74375569	MANNHE	CTRL	6.5626	4.13052	-0.667943	0.00993052	yes
GLCCI1	4:17047159-17143662	MANNHE	CTRL	40.0904	25.2351	-0.667826	0.000721596	yes
B3GALTL	12:29660706-29756409	MANNHE	CTRL	3.17705	2.00298	-0.665542	0.0261127	yes
ARMCX3	X:55421777-55426607	MANNHE	CTRL	33.0695	20.851	-0.665383	0.000721596	yes
PTPN21	10:101235329-101309243	MANNHE	CTRL	3.23952	2.04346	-0.66477	0.00135308	yes
LMTK2	25:38348133-38395804	MANNHE	CTRL	9.00957	5.68695	-0.663804	0.000721596	yes
DLL4	10:36577284-36586360	MANNHE	CTRL	4.94919	3.12634	-0.662719	0.00534264	yes
LOC539734	19:23888013-23925901	MANNHE	CTRL	6.73895	4.25978	-0.661744	0.000721596	yes
GPR133	17:47028028-47202358	MANNHE	CTRL	2.50205	1.58174	-0.661599	0.00993052	yes
OSBPL5	29:49122351-49157927	MANNHE	CTRL	4.61643	2.92035	-0.660638	0.00577637	yes
RAB6B	1:136573248-136630828	MANNHE	CTRL	1.43798	0.911386	-0.657914	0.0421188	yes
DIRAS2	8:88673820-88708956	MANNHE	CTRL	3.6246	2.29956	-0.656461	0.027383	yes
SERPINB8	24:12678975-12716024	MANNHE	CTRL	5.63336	3.57444	-0.656278	0.0304146	yes
PTPN4	2:71992464-72146835	MANNHE	CTRL	2.23937	1.42145	-0.655727	0.030683	yes
PAM	7:104321914-104501792	MANNHE	CTRL	17.2714	10.9686	-0.655001	0.000721596	yes
APOO	X:126397965-126427166	MANNHE	CTRL	19.3462	12.2876	-0.654847	0.00400408	yes
TGFB1I1	25:27762158-27766955	MANNHE	CTRL	6.69423	4.25231	-0.654669	0.0154114	yes
ATP2B4	16:1249731-1313257	MANNHE	CTRL	4.84051	3.07831	-0.653021	0.00400408	yes
ARHGAP31	1:64678145-64797241	MANNHE	CTRL	8.58744	5.46692	-0.651499	0.000721596	yes
BCL3	18:52922245-52931573	MANNHE	CTRL	56.0185	35.6644	-0.651418	0.000721596	yes
LOC781493	14:83892852-84110477	MANNHE	CTRL	5.67891	3.61634	-0.651086	0.000721596	yes
SAR1B	7:47717604-47747828	MANNHE	CTRL	28.7294	18.2965	-0.650961	0.000721596	yes
ASNS	4:15035752-15183208	MANNHE	CTRL	19.0345	12.1258	-0.650535	0.000721596	yes
VARS	23:27365213-27374071	MANNHE	CTRL	73.8125	47.0256	-0.650419	0.000721596	yes
SLC39A7	23:7327197-7331684	MANNHE	CTRL	62.9936	40.1379	-0.650241	0.000721596	yes
SPNS2	19:25598324-25633857	MANNHE	CTRL	7.4759	4.76478	-0.649837	0.0107181	yes
ALG14	3:48600669-48699217	MANNHE	CTRL	31.189	19.8868	-0.649227	0.00246199	yes
C29H11orf10	29:40927661-40931388	MANNHE	CTRL	287.373	183.239	-0.649198	0.000721596	yes
LOC781667	3:12307361-12327827	MANNHE	CTRL	2.30765	1.47145	-0.649188	0.0357811	yes
UACA	10:17516708-17559258	MANNHE	CTRL	3.66568	2.33772	-0.648978	0.00351112	yes
BRB	10:26288222-26289852	MANNHE	CTRL	8.84926	5.64618	-0.64828	0.0452589	yes
NEO1	10:19722762-19960033	MANNHE	CTRL	1.51816	0.969229	-0.647413	0.0289631	yes
GREM1	10:30038587-30039968	MANNHE	CTRL	12.8121	8.19303	-0.645039	0.00577637	yes
PHGDH	3:23672338-23703529	MANNHE	CTRL	212.42	135.846	-0.644943	0.000721596	yes
MYLK	1:68580135-68668202	MANNHE	CTRL	14.0394	8.979	-0.644852	0.000721596	yes
NFXL1	6:68238615-68299616	MANNHE	CTRL	8.44179	5.39911	-0.644827	0.00135308	yes
EPT1	11:73134168-73173557	MANNHE	CTRL	7.90517	5.05614	-0.644759	0.0151595	yes
PLA2G2D1	2:133176654-133189041	MANNHE	CTRL	162.261	103.821	-0.644216	0.000721596	yes
IMPAD1	14:25544904-25560879	MANNHE	CTRL	15.1427	9.69061	-0.643963	0.000721596	yes
ARHGAP29	3:49392813-49474286	MANNHE	CTRL	8.0592	5.16135	-0.642889	0.000721596	yes
KDELR2	25:38870955-38887003	MANNHE	CTRL	96.5392	61.8266	-0.642886	0.000721596	yes
ORC1	3:94538286-94575370	MANNHE	CTRL	16.5689	10.6214	-0.641502	0.000721596	yes
SSR1	23:47853792-47871933	MANNHE	CTRL	121.105	77.7262	-0.639781	0.000721596	yes
ARMCX1	X:55368950-55370792	MANNHE	CTRL	4.29087	2.75663	-0.638365	0.0284911	yes
TOMM40	18:53021417-53032803	MANNHE	CTRL	61.4556	39.5226	-0.636866	0.000721596	yes
TMEM176B	4:114199460-114207377	MANNHE	CTRL	29.162	18.7552	-0.636804	0.000721596	yes
FAT1	27:15476696-15604015	MANNHE	CTRL	1.34106	0.862655	-0.636516	0.00246199	yes
FILIP1	9:15140840-15249645	MANNHE	CTRL	1.73342	1.11582	-0.635517	0.0282238	yes
SRPX	X:110531878-110672969	MANNHE	CTRL	8.70462	5.60405	-0.635311	0.00534264	yes
SEL1L	10:93900620-93965136	MANNHE	CTRL	40.7159	26.2232	-0.634747	0.000721596	yes
CISD1	26:742615-760794	MANNHE	CTRL	69.5276	44.7868	-0.634512	0.000721596	yes
GLIPR2	8:60797958-60816819	MANNHE	CTRL	90.9831	58.6137	-0.634362	0.000721596	yes
TMED9	7:40475154-40479124	MANNHE	CTRL	225.729	145.457	-0.633997	0.000721596	yes
GJA4	3:111481701-111483760	MANNHE	CTRL	32.9643	21.2461	-0.633706	0.00135308	yes
PHLDB2	1:57054878-57145886	MANNHE	CTRL	4.74391	3.05821	-0.63339	0.00193035	yes
PLEKHA8	4:66696648-66755780	MANNHE	CTRL	7.75572	5.00187	-0.632793	0.00826171	yes
MAPK6	10:58430818-58480418	MANNHE	CTRL	36.1996	23.3705	-0.631286	0.000721596	yes
DENND5B	5:78750280-78966082	MANNHE	CTRL	5.81934	3.75819	-0.63082	0.00351112	yes
TMEM39A	1:64806557-64835588	MANNHE	CTRL	30.5375	19.7349	-0.62983	0.000721596	yes
EMG1	5:103841289-103853139	MANNHE	CTRL	59.6076	38.5566	-0.628517	0.0145064	yes
PPIC	7:32114444-32128247	MANNHE	CTRL	13.9993	9.05989	-0.627787	0.00619986	yes
MPZL1	3:930874-1012734	MANNHE	CTRL	5.88596	3.81115	-0.627051	0.00400408	yes
SAR1A	28:26542607-26553908	MANNHE	CTRL	102.48	66.3935	-0.626233	0.000721596	yes
GPC1	3:120383560-120476582	MANNHE	CTRL	18.2395	11.8212	-0.625689	0.000721596	yes
UBE2S	18:62537350-62541237	MANNHE	CTRL	232.952	151.052	-0.624982	0.000721596	yes
LRP1	5:56561574-56641157	MANNHE	CTRL	9.00282	5.83876	-0.624715	0.000721596	yes
BACH1	1:6157332-6174155	MANNHE	CTRL	7.87357	5.10947	-0.623846	0.00492261	yes
GGCX	11:49282708-49294460	MANNHE	CTRL	14.5418	9.44147	-0.623123	0.00135308	yes
CD276	10:20323743-20355566	MANNHE	CTRL	5.70343	3.70397	-0.622756	0.00447872	yes
C18H19orf76	18:56546191-56547223	MANNHE	CTRL	82.0815	53.324	-0.622272	0.00135308	yes
PIK3R5	19:28975177-29001212	MANNHE	CTRL	30.0314	19.5321	-0.620628	0.000721596	yes
TSPAN6	X:50904004-50912847	MANNHE	CTRL	20.062	13.0491	-0.620513	0.00400408	yes
APBB1	15:47245397-47267568	MANNHE	CTRL	4.31953	2.81101	-0.619785	0.0200859	yes
MAN1A1	9:32092886-32265123	MANNHE	CTRL	61.5076	40.0423	-0.619241	0.000721596	yes
LOC617154	29:43163065-43164093	MANNHE	CTRL	106.685	69.4885	-0.618517	0.000721596	yes
HSD3B7	25:27375628-27379105	MANNHE	CTRL	13.3333	8.68466	-0.61849	0.00492261	yes
FAM171A1	13:30067760-30123390	MANNHE	CTRL	3.81779	2.48687	-0.618406	0.0111208	yes
GRB10	4:5104898-5244384	MANNHE	CTRL	7.69875	5.01559	-0.618205	0.00193035	yes
CASP3	27:14084620-14110610	MANNHE	CTRL	21.3399	13.9107	-0.617353	0.000721596	yes
PPIF	28:35167544-35173642	MANNHE	CTRL	16.8467	10.9868	-0.6167	0.0328844	yes
FLVCR2	10:87160746-87200982	MANNHE	CTRL	5.25327	3.4268	-0.616351	0.0242926	yes
GOLT1B	5:89102685-89116625	MANNHE	CTRL	23.7233	15.4755	-0.616323	0.00193035	yes
DHRS1	10:20704885-20713841	MANNHE	CTRL	27.194	17.7435	-0.616	0.000721596	yes
ARFIP2	15:47186493-47191611	MANNHE	CTRL	31.99	20.8754	-0.615818	0.00193035	yes
HSPE1	2:86449524-86451565	MANNHE	CTRL	645.741	421.818	-0.614336	0.000721596	yes
PTGES2	11:98770574-98775940	MANNHE	CTRL	16.217	10.6003	-0.613398	0.00246199	yes
SPTY2D1	29:26356877-26373420	MANNHE	CTRL	16.9963	11.1105	-0.613291	0.000721596	yes
DSTN	13:38259751-38284536	MANNHE	CTRL	48.867	31.9577	-0.612694	0.00246199	yes
NGLY1	27:39869050-39934374	MANNHE	CTRL	30.7192	20.1161	-0.610786	0.000721596	yes
LMAN2	7:40185727-40206355	MANNHE	CTRL	151.67	99.3708	-0.610041	0.000721596	yes
VWA1	16:52360274-52365505	MANNHE	CTRL	13.8141	9.05573	-0.609242	0.00193035	yes
SCN1B	18:45960621-45970523	MANNHE	CTRL	17.159	11.2503	-0.609003	0.00492261	yes
CHID1	29:50539407-50558480	MANNHE	CTRL	107.852	70.7444	-0.60836	0.000721596	yes
HSPD1	2:86438978-86449372	MANNHE	CTRL	245.841	161.286	-0.608101	0.000721596	yes
TMTC2	5:12290946-12714498	MANNHE	CTRL	1.28662	0.844511	-0.607403	0.0480144	yes
ALDH18A1	26:16954142-16995260	MANNHE	CTRL	28.2333	18.5404	-0.606726	0.000721596	yes
MORF4L2	X:57744026-57756166	MANNHE	CTRL	130.511	85.7763	-0.605523	0.000721596	yes
REEP5	10:1043712-1094331	MANNHE	CTRL	53.5419	35.1946	-0.605312	0.000721596	yes
DOCK1	26:46758606-47296203	MANNHE	CTRL	3.74973	2.46952	-0.602552	0.00400408	yes
DERL1	14:18307115-18333425	MANNHE	CTRL	78.6338	51.805	-0.602058	0.000721596	yes
PDIA3	21:55906679-55946435	MANNHE	CTRL	405.159	267.166	-0.600751	0.00298038	yes
2010-09-01	11:44150750-44188823	MANNHE	CTRL	11.31	7.45829	-0.600688	0.00577637	yes
PSMB5	10:21658160-21663680	MANNHE	CTRL	57.478	37.9242	-0.599891	0.000721596	yes
EFEMP2	29:44650626-44657896	MANNHE	CTRL	12.2721	8.0992	-0.599531	0.00660079	yes
CDH11	18:32798823-32888927	MANNHE	CTRL	7.46178	4.92937	-0.598119	0.00135308	yes
TMCO1	3:3166688-3222623	MANNHE	CTRL	84.4932	55.8367	-0.59762	0.000721596	yes
CDC25C	7:51313473-51344138	MANNHE	CTRL	5.12057	3.38471	-0.597272	0.0197488	yes
CREM	13:18496783-18563503	MANNHE	CTRL	6.97869	4.6152	-0.596565	0.0309649	yes
EDEM2	13:64999240-65028233	MANNHE	CTRL	21.5155	14.2304	-0.596396	0.000721596	yes
IDE	26:13920367-14012061	MANNHE	CTRL	12.2851	8.1292	-0.59572	0.000721596	yes
MKL2	25:13072436-13283317	MANNHE	CTRL	2.67754	1.7734	-0.594388	0.0114973	yes
C7	20:33549484-33606517	MANNHE	CTRL	154.716	102.49	-0.594138	0.00193035	yes
C1QTNF1	19:53978215-53984772	MANNHE	CTRL	6.63051	4.3925	-0.594077	0.0122565	yes
GNA15	7:21907305-21926375	MANNHE	CTRL	28.3951	18.8111	-0.594064	0.000721596	yes
SLC25A15	12:21800764-21831677	MANNHE	CTRL	7.99525	5.30208	-0.592586	0.0228901	yes
EPS8	5:94553641-94750049	MANNHE	CTRL	3.36928	2.23546	-0.591868	0.0145064	yes
LYSMD3	7:92440984-92446470	MANNHE	CTRL	12.4978	8.2934	-0.591641	0.0148047	yes
FNDC1	9:97010522-97044679	MANNHE	CTRL	8.02234	5.32424	-0.591446	0.0171825	yes
CAMKK2	17:56136320-56168050	MANNHE	CTRL	8.36289	5.55252	-0.59086	0.0129883	yes
LOC784007	3:13094906-13107081	MANNHE	CTRL	27.2211	18.0752	-0.590714	0.000721596	yes
RRM2	11:87466579-87473868	MANNHE	CTRL	107.07	71.0979	-0.590671	0.000721596	yes
TNFAIP1	19:20379925-20388607	MANNHE	CTRL	9.59228	6.36978	-0.590631	0.0111208	yes
IL33	8:38724601-38792047	MANNHE	CTRL	36.2832	24.0999	-0.590276	0.000721596	yes
SLC12A4	18:35547815-35569646	MANNHE	CTRL	24.885	16.5294	-0.590238	0.000721596	yes
TBXAS1	4:104133818-104307006	MANNHE	CTRL	11.6884	7.76419	-0.590165	0.00619986	yes
DDI2	16:53132802-53168418	MANNHE	CTRL	10.3923	6.90497	-0.589803	0.0129883	yes
MAP1A	21:55816463-55830702	MANNHE	CTRL	1.17204	0.779103	-0.58913	0.0191947	yes
SLC29A1	23:17845968-17856159	MANNHE	CTRL	143.524	95.4499	-0.588473	0.000721596	yes
SEC24A	7:47754926-47832192	MANNHE	CTRL	17.119	11.3949	-0.587213	0.000721596	yes
KDR	6:72232848-72277699	MANNHE	CTRL	15.5168	10.3301	-0.586967	0.000721596	yes
LUZP1	2:130273636-130364944	MANNHE	CTRL	2.32123	1.54538	-0.58693	0.0426246	yes
DDR2	3:6672011-6847222	MANNHE	CTRL	2.56294	1.70671	-0.586586	0.0498058	yes
GOLM1	8:80641484-80687987	MANNHE	CTRL	8.20573	5.46486	-0.586448	0.0370395	yes
IQGAP2	10:7562213-7868170	MANNHE	CTRL	18.827	12.5537	-0.584689	0.000721596	yes
PDGFRA	6:71373512-71421283	MANNHE	CTRL	10.3337	6.89219	-0.584319	0.00193035	yes
CCDC47	19:48661969-48682320	MANNHE	CTRL	39.1305	26.1097	-0.583708	0.00135308	yes
GEM	14:72386750-72399661	MANNHE	CTRL	6.07403	4.05376	-0.583394	0.0133873	yes
TUBG1	19:43316470-43321167	MANNHE	CTRL	27.9053	18.631	-0.582837	0.00135308	yes
CANX	7:1506745-1538915	MANNHE	CTRL	168.427	112.479	-0.58247	0.000721596	yes
CARD10	5:76286569-76312955	MANNHE	CTRL	4.60525	3.08176	-0.579528	0.00868468	yes
LOC100141258	25:2515681-2521344	MANNHE	CTRL	52.1178	34.9049	-0.578347	0.000721596	yes
PSMD10	X:60966170-60973473	MANNHE	CTRL	19.29	12.92	-0.578245	0.0122565	yes
UBE2J1	9:61758419-61782665	MANNHE	CTRL	70.5777	47.2758	-0.578109	0.000721596	yes
ECSCR	7:52346077-52354164	MANNHE	CTRL	28.7546	19.2636	-0.577915	0.00298038	yes
LOC100174924	9:64687631-64689446	MANNHE	CTRL	41.5331	27.8252	-0.577871	0.000721596	yes
TSPAN12	4:86039499-86111099	MANNHE	CTRL	6.65716	4.4607	-0.577637	0.0114973	yes
LAPTM4B	14:68668783-68730663	MANNHE	CTRL	36.9965	24.811	-0.576409	0.00135308	yes
RASA4	25:35064312-35086722	MANNHE	CTRL	7.18884	4.82697	-0.57464	0.00703581	yes
NANS	8:63650014-63669724	MANNHE	CTRL	84.4785	56.7276	-0.574534	0.000721596	yes
ZNF423	18:18041275-18392207	MANNHE	CTRL	3.30165	2.21865	-0.573507	0.0175317	yes
TULP3	5:107343151-107373637	MANNHE	CTRL	3.87464	2.60459	-0.573005	0.0219925	yes
CDC25A	22:52242565-52264187	MANNHE	CTRL	12.9149	8.68158	-0.573003	0.00351112	yes
DYNLT1	9:96486510-96491265	MANNHE	CTRL	54.1815	36.4266	-0.572807	0.00400408	yes
SAP30	8:5610647-5615594	MANNHE	CTRL	17.0145	11.4432	-0.572274	0.0222902	yes
HIGD1D	22:15511407-15518237	MANNHE	CTRL	54.7486	36.8295	-0.571962	0.000721596	yes
CCDC134	5:113335235-113350950	MANNHE	CTRL	8.37648	5.6365	-0.571545	0.0314941	yes
TEK	8:17040334-17143858	MANNHE	CTRL	5.14599	3.46369	-0.571139	0.00577637	yes
HIST1H2BM	23:30737492-30741740	MANNHE	CTRL	49.753	33.5097	-0.570205	0.000721596	yes
MDFI	23:15465649-15482678	MANNHE	CTRL	9.7629	6.57762	-0.569744	0.0242926	yes
SORT1	3:34150753-34218238	MANNHE	CTRL	1.33256	0.898328	-0.568887	0.0407099	yes
ISG20	21:20013596-20030817	MANNHE	CTRL	34.265	23.116	-0.567845	0.00703581	yes
BET1	4:11162346-11176872	MANNHE	CTRL	40.6016	27.3974	-0.567497	0.000721596	yes
TP53BP2	16:27841400-27881990	MANNHE	CTRL	2.20708	1.48932	-0.567488	0.0342272	yes
EMILIN2	24:37496730-37556313	MANNHE	CTRL	9.4369	6.36811	-0.567447	0.00193035	yes
TM4SF1	1:119750362-119758889	MANNHE	CTRL	24.9774	16.8574	-0.567245	0.00246199	yes
ANXA6	7:64359560-64406299	MANNHE	CTRL	142.373	96.1068	-0.566964	0.000721596	yes
ETFDH	17:41262753-41307126	MANNHE	CTRL	13.2004	8.91259	-0.566669	0.00534264	yes
TNFRSF10A	8:71177821-71189201	MANNHE	CTRL	9.88658	6.67565	-0.566564	0.0443354	yes
NUCB2	15:35693294-35729293	MANNHE	CTRL	45.3609	30.6452	-0.56579	0.000721596	yes
THAP5	4:59975918-59982005	MANNHE	CTRL	12.8724	8.70041	-0.565129	0.00298038	yes
PTGFRN	3:26366818-26438341	MANNHE	CTRL	4.89882	3.31335	-0.564141	0.00447872	yes
FBXL7	20:57298327-57780314	MANNHE	CTRL	3.73867	2.52938	-0.56374	0.0210614	yes
USHBP1	7:5768516-5777535	MANNHE	CTRL	4.75761	3.21943	-0.563431	0.0292104	yes
ASPH	14:28700904-28888279	MANNHE	CTRL	4.44271	3.00641	-0.563399	0.0219925	yes
ATP1A1	3:27002623-27035616	MANNHE	CTRL	78.7067	53.3309	-0.561514	0.000721596	yes
RBFOX2	5:74255691-74544965	MANNHE	CTRL	3.19454	2.16472	-0.561426	0.0448485	yes
ACSS1	13:42963396-43076852	MANNHE	CTRL	82.8858	56.1953	-0.560676	0.0373081	yes
NCLN	7:21870308-21882869	MANNHE	CTRL	51.5454	34.9471	-0.560673	0.000721596	yes
KIAA1797	8:23386993-23662561	MANNHE	CTRL	6.04791	4.10142	-0.560313	0.00135308	yes
MRPL24	3:14141432-14146444	MANNHE	CTRL	52.6971	35.7397	-0.560195	0.00492261	yes
CYP1B1	11:20493492-20499001	MANNHE	CTRL	8.66689	5.88014	-0.559663	0.0129883	yes
DNAJB4	3:66922935-66931504	MANNHE	CTRL	12.8105	8.69733	-0.558687	0.0282238	yes
RASSF8	5:84286530-84308915	MANNHE	CTRL	5.72029	3.89002	-0.556312	0.0452589	yes
PREB	11:72493260-72504277	MANNHE	CTRL	48.8266	33.2254	-0.555381	0.00298038	yes
POLQ	1:66552010-66658759	MANNHE	CTRL	3.12154	2.12626	-0.553938	0.00447872	yes
NOC4L	17:46007559-46012986	MANNHE	CTRL	16.4877	11.2317	-0.553818	0.0148047	yes
LAMB2	22:51456199-51470445	MANNHE	CTRL	9.84213	6.70905	-0.552862	0.00193035	yes
AOC3	19:43514250-43521180	MANNHE	CTRL	20.8392	14.2143	-0.551962	0.00193035	yes
PHB	19:37828779-37839397	MANNHE	CTRL	182.508	124.509	-0.55171	0.000721596	yes
CPXM1	13:52844203-52850550	MANNHE	CTRL	8.43933	5.76057	-0.550917	0.0122565	yes
TMEM119	17:66586627-66593119	MANNHE	CTRL	7.77044	5.30501	-0.550642	0.0363115	yes
RCN1	15:63656457-63664372	MANNHE	CTRL	41.1186	28.1031	-0.549058	0.00135308	yes
LOC100847802	25:1692839-1694074	MANNHE	CTRL	14.2476	9.74326	-0.548244	0.0326586	yes
ASAP2	11:88013342-88179953	MANNHE	CTRL	3.83683	2.62554	-0.547299	0.0339772	yes
PDGFRB	7:63496229-63532702	MANNHE	CTRL	16.2972	11.1585	-0.546486	0.000721596	yes
DSEL	24:9738912-9748901	MANNHE	CTRL	2.00956	1.37633	-0.546055	0.0164566	yes
LOC513640	28:25073148-25191276	MANNHE	CTRL	1.62196	1.11126	-0.545538	0.0415535	yes
EMP3	18:55482511-55486850	MANNHE	CTRL	88.0092	60.3061	-0.545351	0.000721596	yes
ADAM19	7:71158811-71250704	MANNHE	CTRL	41.217	28.2465	-0.545169	0.000721596	yes
ALG3	1:83540705-83557613	MANNHE	CTRL	24.114	16.5332	-0.544507	0.00950032	yes
LOC532189	19:22094803-22104979	MANNHE	CTRL	5.03832	3.45485	-0.54432	0.0197488	yes
LOC100847651	9:33544732-33550126	MANNHE	CTRL	28.9115	19.8366	-0.543481	0.000721596	yes
ISOC1	7:26174292-26197424	MANNHE	CTRL	15.7081	10.7816	-0.542935	0.0277113	yes
DAD1	10:22073357-22095132	MANNHE	CTRL	368.632	253.033	-0.542856	0.000721596	yes
MAOA	X:105380190-105462564	MANNHE	CTRL	6.8601	4.71129	-0.542107	0.0284911	yes
SLC30A5	20:10455655-10487640	MANNHE	CTRL	40.8722	28.0703	-0.542076	0.000721596	yes
CTGF	9:70873215-70876451	MANNHE	CTRL	7.25877	4.98586	-0.541883	0.0240618	yes
CTH	3:75082358-75109443	MANNHE	CTRL	5.75059	3.95321	-0.540687	0.0452589	yes
SRP68	19:56222950-56247688	MANNHE	CTRL	78.1475	53.7436	-0.540105	0.00135308	yes
STON1	11:30722155-30739322	MANNHE	CTRL	3.31185	2.27799	-0.539875	0.0231682	yes
TBC1D24	25:1981116-2007805	MANNHE	CTRL	4.60056	3.16455	-0.539811	0.0490113	yes
SLC9A3R2	25:1581873-1589620	MANNHE	CTRL	13.8476	9.53819	-0.537844	0.019495	yes
SUB1	20:41122022-41143914	MANNHE	CTRL	89.8582	61.9155	-0.537349	0.00135308	yes
GOLGA3	17:45418675-45457289	MANNHE	CTRL	12.1789	8.40399	-0.535238	0.000721596	yes
MESDC2	21:27322046-27330423	MANNHE	CTRL	66.2187	45.6964	-0.535157	0.000721596	yes
EIF4G1	1:83466568-83485540	MANNHE	CTRL	108.735	75.1117	-0.533712	0.00492261	yes
SRPR	29:29986078-29991203	MANNHE	CTRL	116.797	80.6867	-0.533598	0.000721596	yes
PLXDC2	13:21595580-22015328	MANNHE	CTRL	6.27185	4.33505	-0.532844	0.0154114	yes
BHLHE41	5:84233718-84236923	MANNHE	CTRL	13.115	9.06864	-0.53226	0.0240618	yes
ITGA9	22:10946190-11307086	MANNHE	CTRL	4.21822	2.91762	-0.531842	0.0261127	yes
USP12	12:32892930-32952532	MANNHE	CTRL	16.6601	11.5381	-0.529988	0.0151595	yes
RIOK1	23:47789366-47806517	MANNHE	CTRL	15.4233	10.6836	-0.529711	0.00950032	yes
TSPAN9	5:107047162-107236972	MANNHE	CTRL	12.7472	8.83108	-0.529517	0.0459866	yes
HCFC2	5:68052160-68097172	MANNHE	CTRL	9.64852	6.68484	-0.529415	0.000721596	yes
ENTPD4	8:71430472-71457015	MANNHE	CTRL	14.1022	9.77107	-0.529328	0.00400408	yes
CASC4	10:103802802-103891475	MANNHE	CTRL	47.0612	32.6101	-0.529221	0.000721596	yes
CDK10	18:14610727-14617871	MANNHE	CTRL	21.5751	14.9568	-0.528559	0.00577637	yes
ANGPTL4	7:18236516-18243587	MANNHE	CTRL	10.6321	7.37633	-0.527451	0.0240618	yes
CACYBP	16:57694738-57705498	MANNHE	CTRL	154.081	106.925	-0.527091	0.000721596	yes
SELRC1	3:94230274-94250563	MANNHE	CTRL	7.77132	5.39371	-0.52688	0.0457449	yes
TMEM37	2:71607733-71613808	MANNHE	CTRL	19.3693	13.4711	-0.523902	0.0222902	yes
DPAGT1	15:30204633-30209462	MANNHE	CTRL	29.7907	20.7614	-0.520962	0.00298038	yes
GOLGB1	1:66758917-66823420	MANNHE	CTRL	17.777	12.3903	-0.520797	0.000721596	yes
DLG5	28:33719656-33842951	MANNHE	CTRL	3.2457	2.26314	-0.520204	0.0103108	yes
ZFAND2A	25:42221369-42229177	MANNHE	CTRL	9.98299	6.96679	-0.518978	0.0289631	yes
FASTKD1	2:26740842-26776375	MANNHE	CTRL	9.93498	6.9347	-0.518683	0.00660079	yes
PFAS	19:28498628-28511705	MANNHE	CTRL	17.8394	12.4553	-0.518309	0.00193035	yes
MTFMT	10:11883589-11908872	MANNHE	CTRL	18.1272	12.6707	-0.516661	0.0145064	yes
ADK	28:30215524-30732466	MANNHE	CTRL	41.5237	29.0307	-0.516359	0.00246199	yes
THBD	13:42217370-42221004	MANNHE	CTRL	12.9665	9.07222	-0.515267	0.00351112	yes
RDX	15:20589669-20687661	MANNHE	CTRL	17.8601	12.4974	-0.515115	0.00193035	yes
VKORC1	25:27457362-27459608	MANNHE	CTRL	39.3504	27.5664	-0.513467	0.0154114	yes
FLRT2	10:98332058-98338825	MANNHE	CTRL	6.73057	4.71968	-0.51204	0.00193035	yes
TMEM208	18:34974963-34977126	MANNHE	CTRL	51.834	36.3621	-0.511465	0.00950032	yes
NBL1	2:133610638-133641645	MANNHE	CTRL	13.1334	9.21458	-0.511249	0.0210614	yes
LDHA	29:26543856-26555739	MANNHE	CTRL	192.832	135.366	-0.510482	0.00246199	yes
ERP44	8:65500570-65597182	MANNHE	CTRL	98.625	69.2518	-0.510103	0.00298038	yes
LOC515150	16:4998440-5006453	MANNHE	CTRL	150.745	106.027	-0.507677	0.00135308	yes
ATP2A2	17:56458749-56512895	MANNHE	CTRL	45.4594	31.9856	-0.507157	0.00246199	yes
FKBP10	19:42623025-42655993	MANNHE	CTRL	15.0951	10.6251	-0.506614	0.0203765	yes
CYP27A1	2:107462686-107504971	MANNHE	CTRL	9.26387	6.52109	-0.506502	0.0342272	yes
ACVRL1	5:28097835-28106733	MANNHE	CTRL	24.7866	17.4484	-0.506464	0.00246199	yes
TMEM97	19:20364622-20372637	MANNHE	CTRL	41.8041	29.4413	-0.505805	0.00135308	yes
STT3B	22:6083378-6186315	MANNHE	CTRL	43.7298	30.8555	-0.503087	0.00135308	yes
SEC61B	8:64722965-64731270	MANNHE	CTRL	332.183	234.862	-0.500169	0.00246199	yes
SFXN1	10:5552569-5612663	MANNHE	CTRL	25.6916	18.1671	-0.499973	0.00826171	yes
SND1	4:92679168-93108508	MANNHE	CTRL	108.465	76.7147	-0.499654	0.00447872	yes
PM20D1	16:3438788-3463795	MANNHE	CTRL	7.13449	5.04746	-0.499253	0.043146	yes
HYAL2	22:50592323-50597462	MANNHE	CTRL	19.4566	13.7655	-0.499202	0.0114973	yes
RAI14	20:39351342-39486307	MANNHE	CTRL	13.2996	9.41061	-0.499027	0.00400408	yes
HSPA9	7:51506215-51521515	MANNHE	CTRL	119.293	84.5123	-0.497278	0.00298038	yes
SCUBE2	15:44090650-44159026	MANNHE	CTRL	22.452	15.913	-0.496632	0.00400408	yes
SPCS1	22:48710806-48712454	MANNHE	CTRL	155.945	110.555	-0.496275	0.00298038	yes
PNO1	11:66566346-66575632	MANNHE	CTRL	29.0037	20.5742	-0.495396	0.0103108	yes
ACO1	8:11480113-11543046	MANNHE	CTRL	20.453	14.5135	-0.494919	0.00447872	yes
TPM2	8:60267450-60274815	MANNHE	CTRL	29.0742	20.6407	-0.49425	0.00534264	yes
ITGB1	13:20248977-20290982	MANNHE	CTRL	97.5897	69.286	-0.494166	0.00351112	yes
SEPN1	2:127851643-127869417	MANNHE	CTRL	14.0026	9.94221	-0.494052	0.00447872	yes
EIF2S2	13:64050710-64069300	MANNHE	CTRL	152.807	108.503	-0.493972	0.00135308	yes
GPNMB	4:32010891-32037151	MANNHE	CTRL	23.7858	16.9045	-0.492691	0.00619986	yes
ALPL	2:131791674-131857642	MANNHE	CTRL	6.3964	4.54726	-0.492262	0.0440679	yes
PLXND1	22:56774895-56825062	MANNHE	CTRL	15.6324	11.1295	-0.490155	0.00246199	yes
S100A1	3:16812601-16816399	MANNHE	CTRL	43.9675	31.3257	-0.489088	0.0235051	yes
RUNX1	1:148678709-148949053	MANNHE	CTRL	10.0638	7.17077	-0.488976	0.0491377	yes
LOC781979	2:72589400-72592434	MANNHE	CTRL	10.146	7.23435	-0.487978	0.0347232	yes
DES	2:108075459-108082535	MANNHE	CTRL	26.5128	18.9061	-0.487841	0.00534264	yes
EIF5A	19:27648381-27653258	MANNHE	CTRL	535.991	382.663	-0.486133	0.00993052	yes
FGD5	22:58037190-58148608	MANNHE	CTRL	3.54071	2.52867	-0.485662	0.0370395	yes
UQCRQ	7:46069318-46070585	MANNHE	CTRL	101.257	72.3296	-0.485361	0.00660079	yes
C1R	5:103737160-103747961	MANNHE	CTRL	104.559	74.721	-0.484737	0.00400408	yes
GPR116	23:20052362-20128180	MANNHE	CTRL	5.76417	4.11972	-0.484567	0.0141683	yes
VMP1	19:10903732-11032405	MANNHE	CTRL	48.5736	34.7309	-0.483953	0.00298038	yes
NAGLU	19:43258821-43265802	MANNHE	CTRL	12.8673	9.20131	-0.483793	0.0225854	yes
LRRC8A	11:99411392-99437851	MANNHE	CTRL	15.2112	10.8817	-0.483232	0.00492261	yes
TIPARP	1:111829353-111857046	MANNHE	CTRL	29.8454	21.3506	-0.483232	0.00246199	yes
TGFBI	7:49040287-49095978	MANNHE	CTRL	40.6988	29.1318	-0.482391	0.00400408	yes
CFL2	21:45519650-45522303	MANNHE	CTRL	19.9496	14.2816	-0.482202	0.0203765	yes
SRP72	6:73511905-73537572	MANNHE	CTRL	38.5139	27.5769	-0.481918	0.00298038	yes
COLEC12	24:35630927-35816269	MANNHE	CTRL	10.3008	7.37623	-0.481801	0.0107181	yes
LOC100848452	18:51039198-51041452	MANNHE	CTRL	143.376	102.681	-0.481635	0.00745196	yes
FAM18B2	19:33585299-33594740	MANNHE	CTRL	36.9504	26.4707	-0.481196	0.00703581	yes
ERG	1:152379402-152515109	MANNHE	CTRL	8.45869	6.06001	-0.481115	0.0231682	yes
PPPDE2	5:113205161-113227847	MANNHE	CTRL	26.5029	18.9911	-0.480831	0.00193035	yes
XDH	11:14176296-14236376	MANNHE	CTRL	80.2321	57.5006	-0.480602	0.00534264	yes
MTHFD1L	9:89136865-89285018	MANNHE	CTRL	31.5273	22.6059	-0.4799	0.00246199	yes
PLAT	27:36738827-36762837	MANNHE	CTRL	31.5177	22.5993	-0.479884	0.00492261	yes
BATF	10:87110379-87132330	MANNHE	CTRL	74.5077	53.4467	-0.479289	0.00577637	yes
MCM10	13:28132566-28170527	MANNHE	CTRL	12.0771	8.66748	-0.47859	0.00447872	yes
CCNYL1	2:96424300-96460888	MANNHE	CTRL	8.03171	5.76496	-0.478398	0.0197488	yes
C3H1orf162	3:31991177-31996055	MANNHE	CTRL	20.9336	15.028	-0.478173	0.0462476	yes
PQLC3	11:86588328-86601250	MANNHE	CTRL	56.6362	40.6945	-0.476888	0.00400408	yes
UCHL3	12:50948443-50997547	MANNHE	CTRL	62.9438	45.2474	-0.476229	0.00660079	yes
ACVR1B	5:28037569-28070153	MANNHE	CTRL	7.36913	5.29741	-0.476207	0.0370395	yes
CCT5	20:63097313-63111305	MANNHE	CTRL	114.089	82.0436	-0.475693	0.00534264	yes
XPOT	5:49550225-49590720	MANNHE	CTRL	53.2026	38.265	-0.475472	0.00193035	yes
S100A11	3:18768798-18770271	MANNHE	CTRL	295.817	212.818	-0.475087	0.00447872	yes
CIRH1A	18:36469930-36500064	MANNHE	CTRL	26.6076	19.1439	-0.47495	0.00619986	yes
BOLA3	11:10489731-10497683	MANNHE	CTRL	37.8844	27.2884	-0.473318	0.0317565	yes
STOM	8:112646068-112680924	MANNHE	CTRL	54.8463	39.5093	-0.473203	0.00577637	yes
EIF5B	11:4425371-4618883	MANNHE	CTRL	18.7487	13.509	-0.472865	0.0237661	yes
SURF4	11:104319214-104334584	MANNHE	CTRL	73.5488	53.0035	-0.472612	0.00534264	yes
RHBDF2	19:55893570-55903544	MANNHE	CTRL	45.9772	33.1371	-0.472472	0.00298038	yes
LOC100848651	11:72410022-72492025	MANNHE	CTRL	13.1242	9.46699	-0.471252	0.0160992	yes
BTG2	16:889144-894202	MANNHE	CTRL	38.8372	28.0155	-0.471213	0.00577637	yes
MRTO4	2:133992722-133998200	MANNHE	CTRL	75.5526	54.5084	-0.471003	0.00447872	yes
SUOX	5:57639564-57643834	MANNHE	CTRL	15.7243	11.3482	-0.470523	0.0145064	yes
ERGIC2	5:80616118-80659413	MANNHE	CTRL	36.6806	26.4751	-0.470381	0.00534264	yes
C8H9orf3	8:82590160-83012157	MANNHE	CTRL	22.0164	15.8995	-0.4696	0.00400408	yes
DNAJB1	7:12366855-12370536	MANNHE	CTRL	65.199	47.1094	-0.468834	0.0118757	yes
PALLD	8:701735-925959	MANNHE	CTRL	11.4779	8.29381	-0.468755	0.0122565	yes
CXCL13	6:94039945-94046360	MANNHE	CTRL	400.038	289.191	-0.468113	0.00826171	yes
DEXI	25:9666053-9680637	MANNHE	CTRL	23.5864	17.0555	-0.467715	0.0279965	yes
TXN	8:101484820-101492586	MANNHE	CTRL	487.599	352.743	-0.467078	0.00619986	yes
TM9SF3	26:17712945-17774060	MANNHE	CTRL	50.2093	36.3254	-0.466974	0.00703581	yes
EIF2AK3	11:47302535-47384703	MANNHE	CTRL	21.0027	15.1995	-0.466551	0.00246199	yes
TKT	22:48264564-48288061	MANNHE	CTRL	140.219	101.496	-0.46626	0.00745196	yes
RBBP8	24:33886946-33951331	MANNHE	CTRL	24.3044	17.6061	-0.465148	0.00577637	yes
LOC516579	13:80163430-80263638	MANNHE	CTRL	6.59116	4.7788	-0.463883	0.0111208	yes
PPIB	10:45875013-45886880	MANNHE	CTRL	869.249	630.292	-0.46375	0.0154114	yes
NOLC1	26:22692691-22701500	MANNHE	CTRL	64.8013	46.991	-0.463638	0.00400408	yes
PIGK	3:67687801-67824633	MANNHE	CTRL	33.3888	24.2167	-0.463359	0.0122565	yes
TMEM33	6:62464239-62479431	MANNHE	CTRL	17.1489	12.4493	-0.462053	0.0284911	yes
LOC523126	12:75664651-75870598	MANNHE	CTRL	6.09625	4.42675	-0.461675	0.0225854	yes
LOC510193	5:74935712-74959664	MANNHE	CTRL	8.48026	6.1584	-0.461551	0.01887	yes
CDC6	19:41185974-41196948	MANNHE	CTRL	16.6747	12.1093	-0.461549	0.0137835	yes
C27H8orf4	27:34893818-34895120	MANNHE	CTRL	22.5341	16.3657	-0.46144	0.0258838	yes
TXNDC17	19:25847054-25849307	MANNHE	CTRL	42.0391	30.5477	-0.460669	0.0495769	yes
AKAP1	19:8171382-8193546	MANNHE	CTRL	24.8346	18.0477	-0.460535	0.00447872	yes
TRIB1	14:16353387-16361545	MANNHE	CTRL	26.9583	19.6068	-0.459377	0.00660079	yes
TARS	20:40349622-40373064	MANNHE	CTRL	78.3296	57.057	-0.457154	0.00577637	yes
PROSC	27:32746962-32756494	MANNHE	CTRL	21.2494	15.479	-0.457106	0.0203765	yes
WDR60	4:120326812-120386650	MANNHE	CTRL	6.81295	4.96476	-0.456557	0.0398602	yes
AK2	2:121486306-121509905	MANNHE	CTRL	126.454	92.1512	-0.456534	0.00577637	yes
KIAA0664	19:24167727-24188745	MANNHE	CTRL	22.711	16.5687	-0.454936	0.00492261	yes
ITGA5	5:25778011-25799053	MANNHE	CTRL	26.158	19.0961	-0.453974	0.00492261	yes
AARS	18:1829596-1850873	MANNHE	CTRL	44.1669	32.2678	-0.452871	0.00492261	yes
EBAG9	14:57006994-57020071	MANNHE	CTRL	18.1626	13.2702	-0.452776	0.0225854	yes
TMEM66	27:25391012-25416076	MANNHE	CTRL	90.2092	65.9387	-0.45215	0.00577637	yes
GLO1	23:12483467-12509232	MANNHE	CTRL	35.8544	26.2251	-0.451202	0.00745196	yes
MBOAT7	18:63397969-63412142	MANNHE	CTRL	25.647	18.7599	-0.451133	0.0129883	yes
VIM	13:31945011-31952941	MANNHE	CTRL	348.307	255.08	-0.449407	0.0164566	yes
TDG	5:67973221-67994057	MANNHE	CTRL	24.4847	17.9318	-0.44936	0.00577637	yes
IL1R1	11:6848041-6931607	MANNHE	CTRL	11.8733	8.70541	-0.44773	0.0160992	yes
C1QBP	19:26724672-26730101	MANNHE	CTRL	150.064	110.059	-0.447306	0.00660079	yes
SNHG3	2:125499121-125501522	MANNHE	CTRL	94.6631	69.4503	-0.446821	0.0154114	yes
SLC3A2	29:41855870-41896761	MANNHE	CTRL	48.5192	35.603	-0.446556	0.00911938	yes
MRPS11	21:19867699-19898711	MANNHE	CTRL	37.8311	27.7891	-0.445055	0.0304146	yes
BSG	7:44816939-44823915	MANNHE	CTRL	174.29	128.105	-0.444163	0.00868468	yes
DOCK6	7:16851746-16898876	MANNHE	CTRL	4.94413	3.63966	-0.441915	0.0331241	yes
CYP51A1	4:9306413-9323252	MANNHE	CTRL	25.3179	18.6395	-0.441796	0.00868468	yes
GLB1	22:7413787-7517596	MANNHE	CTRL	23.7903	17.5345	-0.440179	0.0160992	yes
SPTBN1	11:37030008-37241384	MANNHE	CTRL	59.4918	43.8579	-0.439854	0.01887	yes
RPS6KB1	19:11070900-11107334	MANNHE	CTRL	40.6703	30.0121	-0.438432	0.00993052	yes
SEC22B	3:23186297-23211692	MANNHE	CTRL	30.5966	22.5805	-0.438298	0.0219925	yes
C3H1orf85	3:14558546-14561400	MANNHE	CTRL	27.0715	19.9964	-0.437037	0.0225854	yes
SLC25A24	3:35152468-35210449	MANNHE	CTRL	6.71787	4.96292	-0.436815	0.0495769	yes
LOC789485	7:8930802-8971372	MANNHE	CTRL	4.9296	3.6421	-0.436701	0.0264322	yes
PLVAP	7:5685230-5704118	MANNHE	CTRL	32.5859	24.0792	-0.436459	0.0203765	yes
TRAPPC3	3:110260237-110275244	MANNHE	CTRL	27.3077	20.1999	-0.434954	0.0328844	yes
RRP9	22:49544957-49552848	MANNHE	CTRL	20.6339	15.2882	-0.4326	0.0396174	yes
NRP1	13:19911856-20059590	MANNHE	CTRL	17.3839	12.8807	-0.43254	0.0122565	yes
YIPF5	7:57200806-57216549	MANNHE	CTRL	48.3288	35.8244	-0.431938	0.0126481	yes
TOM1	5:73905662-73946203	MANNHE	CTRL	15.9303	11.8149	-0.431165	0.0298003	yes
TBL2	25:34151409-34156683	MANNHE	CTRL	17.3102	12.8477	-0.43011	0.0294844	yes
GPX4	7:45205076-45207498	MANNHE	CTRL	126.057	93.5999	-0.4295	0.0129883	yes
PGRMC2	17:29872405-29890871	MANNHE	CTRL	43.3692	32.2087	-0.429219	0.0118757	yes
RPL22L1	1:97339620-97343997	MANNHE	CTRL	217.687	161.684	-0.429081	0.0154114	yes
ANXA4	11:68070486-68144492	MANNHE	CTRL	30.5435	22.7066	-0.427754	0.0181914	yes
ADM	15:42911042-42913326	MANNHE	CTRL	31.6357	23.5207	-0.427624	0.0207311	yes
VCL	28:30053805-30166317	MANNHE	CTRL	11.6999	8.69896	-0.427579	0.0148047	yes
TJP1	21:28931887-29123023	MANNHE	CTRL	6.71931	4.99829	-0.426877	0.0145064	yes
CTSB	8:7414944-7423429	MANNHE	CTRL	292.33	217.459	-0.426856	0.0261127	yes
DHRS11	19:13237730-13247629	MANNHE	CTRL	27.1199	20.1747	-0.4268	0.0365834	yes
NPM3	26:22385929-22388130	MANNHE	CTRL	56.099	41.7326	-0.4268	0.0261127	yes
OLFML2B	3:7528021-7577299	MANNHE	CTRL	8.70383	6.47579	-0.426595	0.0482283	yes
EIF4EBP2	28:26764784-26786028	MANNHE	CTRL	48.0807	35.7958	-0.425667	0.0210614	yes
GARS	4:66102953-66156434	MANNHE	CTRL	50.4691	37.6018	-0.4246	0.0107181	yes
SFXN2	26:23593340-23611728	MANNHE	CTRL	13.451	10.0256	-0.424023	0.0334095	yes
MBNL2	12:78283459-78445752	MANNHE	CTRL	12.8827	9.60765	-0.423181	0.0237661	yes
TCN2	17:71711465-71727449	MANNHE	CTRL	58.2545	43.451	-0.42298	0.0148047	yes
VEGFA	23:17256016-17269819	MANNHE	CTRL	29.0459	21.6695	-0.422674	0.0491377	yes
PNP	10:26667690-26673916	MANNHE	CTRL	148.438	110.82	-0.421644	0.0133873	yes
FGL2	4:44152040-44269638	MANNHE	CTRL	44.6307	33.322	-0.421564	0.0168208	yes
IRAK1	X:40127014-40133423	MANNHE	CTRL	71.1671	53.1807	-0.42031	0.0145064	yes
ABCE1	17:13333860-13446150	MANNHE	CTRL	40.971	30.6246	-0.419913	0.019495	yes
ULK1	17:46171528-46193389	MANNHE	CTRL	21.4199	16.0116	-0.419839	0.0168208	yes
CCT6A	25:27985752-27994510	MANNHE	CTRL	93.0907	69.6592	-0.418323	0.01887	yes
POLE3	8:104356461-104359086	MANNHE	CTRL	86.9916	65.1197	-0.417781	0.0126481	yes
BAK1	23:7655891-7658885	MANNHE	CTRL	69.238	51.8661	-0.416773	0.0347232	yes
DDX18	4:8566241-8568524	MANNHE	CTRL	27.6417	20.713	-0.416308	0.0122565	yes
2011-09-01	6:93528979-93628593	MANNHE	CTRL	17.3301	12.9884	-0.416058	0.0446022	yes
NR2F2	21:10793102-10800183	MANNHE	CTRL	15.4979	11.6195	-0.415524	0.0352791	yes
CD164	9:41246267-41256989	MANNHE	CTRL	109.54	82.1366	-0.415363	0.0133873	yes
SEC13	22:54958545-54993723	MANNHE	CTRL	87.0494	65.2875	-0.415028	0.0148047	yes
GNL3	22:48712945-48731744	MANNHE	CTRL	82.0107	61.5266	-0.414601	0.0237661	yes
STIP1	29:43111545-43124096	MANNHE	CTRL	116.091	87.1985	-0.412882	0.0181914	yes
CARS	29:49202353-49254992	MANNHE	CTRL	26.4788	19.9045	-0.411743	0.0160992	yes
RALGPS2	16:61559976-61719616	MANNHE	CTRL	25.8664	19.4464	-0.411573	0.0261127	yes
CDK1	28:16620267-16633922	MANNHE	CTRL	41.4774	31.2018	-0.410696	0.0242926	yes
LEPRE1	3:104065148-104084576	MANNHE	CTRL	47.682	35.8912	-0.409815	0.0157571	yes
BCAM	18:52965137-52976446	MANNHE	CTRL	37.0437	27.9259	-0.407623	0.0168208	yes
TSR1	19:23877554-23886659	MANNHE	CTRL	25.9901	19.5959	-0.407413	0.0213665	yes
UQCRB	14:70329413-70334127	MANNHE	CTRL	251.76	189.849	-0.407197	0.017848	yes
CTNND1	15:82283933-82329276	MANNHE	CTRL	9.60691	7.24477	-0.407132	0.0237661	yes
PAPSS1	6:18740228-18854670	MANNHE	CTRL	24.6427	18.5921	-0.406471	0.0237661	yes
HAX1	3:16307940-16310581	MANNHE	CTRL	43.8254	33.0936	-0.405217	0.0312604	yes
KLHDC2	10:42792726-42808108	MANNHE	CTRL	38.3394	28.9546	-0.405034	0.0213665	yes
LOC512271	25:41273516-41296379	MANNHE	CTRL	26.8706	20.2966	-0.404788	0.034492	yes
SDC4	13:74391485-74412874	MANNHE	CTRL	31.1475	23.5292	-0.40466	0.0249489	yes
MDH2	25:34734994-34779637	MANNHE	CTRL	190.084	143.623	-0.404354	0.0154114	yes
NCKAP1	2:13574039-13666805	MANNHE	CTRL	6.7689	5.11454	-0.404316	0.04012	yes
SEC31A	6:99426920-99487575	MANNHE	CTRL	40.9143	30.9264	-0.403764	0.0154114	yes
FCGRT	18:56415699-56421855	MANNHE	CTRL	186.565	141.207	-0.401868	0.0246215	yes
TRIB2	11:85205521-85233638	MANNHE	CTRL	12.6996	9.61354	-0.401638	0.0360552	yes
MS4A7	15:84526490-84543454	MANNHE	CTRL	32.0913	24.298	-0.401344	0.0464675	yes
GOLGA2	11:98878584-98895204	MANNHE	CTRL	37.7858	28.6234	-0.400649	0.0216807	yes
LOC509109	11:6545165-6660398	MANNHE	CTRL	33.9089	25.7006	-0.39986	0.019495	yes
LYAR	6:107443251-107463870	MANNHE	CTRL	41.0338	31.1094	-0.399461	0.0282238	yes
TENC1	5:27068593-27082523	MANNHE	CTRL	13.4061	10.1638	-0.399452	0.0301007	yes
MRPL15	14:23675382-23680939	MANNHE	CTRL	24.9712	18.9356	-0.399163	0.0357811	yes
ADI1	8:112948193-112954511	MANNHE	CTRL	37.452	28.4056	-0.398868	0.046727	yes
C21H15orf39	21:33933715-33939819	MANNHE	CTRL	12.8276	9.73029	-0.398694	0.0320632	yes
SELPLG	17:66557187-66573394	MANNHE	CTRL	81.9784	62.1921	-0.398512	0.0148047	yes
TMEM109	29:37833098-37841879	MANNHE	CTRL	40.758	30.9287	-0.39814	0.0235051	yes
VCAM1	3:42743607-42766060	MANNHE	CTRL	19.8505	15.0655	-0.397925	0.0326586	yes
ROCK2	11:86501576-86584989	MANNHE	CTRL	10.0474	7.62568	-0.397881	0.0309649	yes
SLC25A26	22:35183569-35329921	MANNHE	CTRL	27.1799	20.6328	-0.397603	0.0490113	yes
PABPC4	3:107084062-107097490	MANNHE	CTRL	79.516	60.3733	-0.397334	0.0160992	yes
RAB1A	11:63429722-63458565	MANNHE	CTRL	138.768	105.419	-0.39655	0.0222902	yes
CTSK	3:19994997-20007861	MANNHE	CTRL	75.1474	57.1047	-0.396114	0.0164566	yes
F11R	3:8483557-8508123	MANNHE	CTRL	20.5372	15.6153	-0.395278	0.0347232	yes
CDK8	12:33321675-33370251	MANNHE	CTRL	14.7224	11.1968	-0.394923	0.0490113	yes
MAP7D1	3:110233084-110259194	MANNHE	CTRL	23.2972	17.7221	-0.394605	0.027383	yes
CD163	5:102245936-102278444	MANNHE	CTRL	54.2123	41.2411	-0.394538	0.030683	yes
ACACA	19:13752491-13996058	MANNHE	CTRL	5.40159	4.11286	-0.393243	0.0403971	yes
AURKAIP1	16:52398514-52402984	MANNHE	CTRL	68.4391	52.1119	-0.393208	0.04241	yes
PA2G4	5:57532244-57538950	MANNHE	CTRL	173.473	132.127	-0.392789	0.0287282	yes
LYVE1	15:42678183-42692474	MANNHE	CTRL	41.2082	31.3951	-0.392392	0.0277113	yes
POLR1A	11:48629651-48713878	MANNHE	CTRL	11.2861	8.60927	-0.390586	0.0242926	yes
IGF2R	9:97638101-97741388	MANNHE	CTRL	14.4267	11.0168	-0.389038	0.0255868	yes
ACO2	5:113089138-113150601	MANNHE	CTRL	68.4082	52.3019	-0.387307	0.0267774	yes
LOC788801	23:34219120-34251090	MANNHE	CTRL	86.5798	66.2583	-0.385929	0.0284911	yes
PPID	17:41249492-41262411	MANNHE	CTRL	61.6818	47.2294	-0.385158	0.0287282	yes
UBE2O	19:55928560-55976414	MANNHE	CTRL	12.1023	9.26758	-0.385017	0.0418645	yes
TREML2	23:15122285-15133485	MANNHE	CTRL	53.7887	41.195	-0.384835	0.0384246	yes
CTPS	3:105800994-105832415	MANNHE	CTRL	23.2812	17.8405	-0.384007	0.0287282	yes
DLAT	15:22665149-22699818	MANNHE	CTRL	12.052	9.2415	-0.383069	0.0429143	yes
BRCA2	12:28636526-28688200	MANNHE	CTRL	8.09001	7.24536	-0.382844	0.0287282	yes
APP	1:9607381-9921005	MANNHE	CTRL	58.1814	44.6208	-0.382842	0.0258838	yes
TBC1D15	5:1433277-1507161	MANNHE	CTRL	22.9146	17.5938	-0.381197	0.0289631	yes
RANBP1	17:75037054-75038117	MANNHE	CTRL	77.3998	59.4335	-0.381053	0.0384246	yes
EPRS	16:24171138-24236388	MANNHE	CTRL	44.5157	34.1871	-0.38086	0.0292104	yes
PTPRS	7:20191849-20257817	MANNHE	CTRL	7.40891	5.69181	-0.380373	0.0452589	yes
NARS	24:57344498-57361216	MANNHE	CTRL	79.6282	61.1865	-0.380066	0.0323846	yes
ZW10	15:24616729-24652072	MANNHE	CTRL	18.7781	14.4383	-0.379147	0.0448485	yes
FAM98A	11:16157513-16173332	MANNHE	CTRL	23.1677	17.8154	-0.378989	0.0379111	yes
CSGALNACT2	28:13651047-13680714	MANNHE	CTRL	12.74	9.80245	-0.378148	0.0398602	yes
HSPB1	25:34858437-34861035	MANNHE	CTRL	457.451	352.039	-0.377884	0.0412976	yes
UBFD1	25:21476412-21488491	MANNHE	CTRL	64.764	49.8435	-0.377787	0.0331241	yes
AP2S1	18:54363678-54373314	MANNHE	CTRL	110.751	85.2406	-0.377711	0.0376098	yes
TM9SF2	X:20487656-20568357	MANNHE	CTRL	94.1658	72.5002	-0.37722	0.0355225	yes
MAN1B1	11:106125017-106152397	MANNHE	CTRL	53.8123	41.4325	-0.377173	0.0289631	yes
LGMN	21:57965315-58004541	MANNHE	CTRL	190.673	146.829	-0.376959	0.0429143	yes
FNDC3A	12:18844596-18936677	MANNHE	CTRL	26.3415	20.2901	-0.376561	0.0292104	yes
TMEM147	18:46394494-46396382	MANNHE	CTRL	143.642	110.673	-0.37617	0.0294844	yes
GINS1	13:54063353-54079412	MANNHE	CTRL	26.1626	20.1873	-0.374053	0.0355225	yes
OAT	26:44378155-44397476	MANNHE	CTRL	39.3563	30.3888	-0.373057	0.0328844	yes
YARS	2:121680010-121712373	MANNHE	CTRL	49.9747	38.6246	-0.371681	0.0294844	yes
ARL1	5:65614888-65624326	MANNHE	CTRL	69.5227	53.746	-0.371328	0.0403971	yes
LETM1	6:109710994-109736356	MANNHE	CTRL	34.83	26.9289	-0.371179	0.034492	yes
WDR77	3:32020913-32030445	MANNHE	CTRL	26.7752	20.7018	-0.37114	0.0403971	yes
IFNAR1	1:1467703-1496151	MANNHE	CTRL	40.1409	31.048	-0.37057	0.0352791	yes
BCAP31	X:39840525-39869302	MANNHE	CTRL	120.79	93.5156	-0.369219	0.0339772	yes
LMNB2	7:22428090-22448438	MANNHE	CTRL	26.2842	20.3586	-0.368557	0.034492	yes
SHC1	3:15671382-15681845	MANNHE	CTRL	65.2347	50.5356	-0.36834	0.0360552	yes
SRP14	10:35805062-35808329	MANNHE	CTRL	164.934	127.803	-0.367965	0.0363115	yes
CIT	17:57819704-57990995	MANNHE	CTRL	5.75239	4.45738	-0.367964	0.0491377	yes
TMEM167A	7:85222950-85267629	MANNHE	CTRL	63.2033	49.0186	-0.36667	0.0282238	yes
COX7A2	9:15041835-15046951	MANNHE	CTRL	433.87	336.957	-0.364698	0.0355225	yes
HBS1L	9:74011374-74096501	MANNHE	CTRL	38.2255	29.7079	-0.363689	0.0387061	yes
NOP10	10:28351839-28355350	MANNHE	CTRL	22.9054	17.8026	-0.363601	0.0421188	yes
MYBBP1A	19:25635831-25650968	MANNHE	CTRL	31.8426	24.7635	-0.362739	0.030683	yes
CCDC117	17:70331047-70342079	MANNHE	CTRL	29.4102	22.8767	-0.362433	0.0451336	yes
GOLGA4	22:10813997-10923960	MANNHE	CTRL	22.3882	17.4164	-0.362293	0.0317565	yes
NUP43	9:88051509-88066828	MANNHE	CTRL	19.6135	15.2676	-0.361377	0.0482283	yes
GORASP2	2:25566347-25599241	MANNHE	CTRL	60.1039	46.8228	-0.360247	0.0360552	yes
SFRP1	27:35900359-35943920	MANNHE	CTRL	25.4642	19.9003	-0.355683	0.0448485	yes
RAB7L1	16:3344081-3351233	MANNHE	CTRL	23.8095	18.6083	-0.355586	0.0464675	yes
NOMO2	25:14646661-14703186	MANNHE	CTRL	45.9294	35.9083	-0.355103	0.0440679	yes
LOC510860	16:4939774-4950979	MANNHE	CTRL	133.035	104.307	-0.350968	0.0493682	yes
MDH1	11:61970466-61994479	MANNHE	CTRL	123.054	96.6997	-0.347707	0.0472439	yes
GUSB	25:28162567-28174955	MANNHE	CTRL	46.0784	36.2225	-0.347207	0.0454824	yes
MTPN	4:100550304-100626568	MANNHE	CTRL	87.7145	110.985	0.339476	0.047717	yes
KIAA0748	5:60265783-60300500	MANNHE	CTRL	36.4443	46.3003	0.345327	0.0491377	yes
TRAFD1	17:64313220-64331408	MANNHE	CTRL	42.435	54.0329	0.348582	0.047717	yes
GIMAP8	4:113669342-113683417	MANNHE	CTRL	111.006	141.373	0.348871	0.0443354	yes
UHRF2	8:38568744-38625344	MANNHE	CTRL	40.7887	51.9596	0.34922	0.0495769	yes
VCPIP1	14:32883559-32908857	MANNHE	CTRL	11.6718	14.8817	0.350514	0.0498058	yes
USP40	3:113786836-113867108	MANNHE	CTRL	14.7376	18.7918	0.350606	0.047717	yes
NDUFB10	25:1517625-1520287	MANNHE	CTRL	151.756	193.714	0.352174	0.0451337	yes
SKAP1	19:38697508-39003437	MANNHE	CTRL	72.3857	92.4375	0.352774	0.0452589	yes
SP100	2:119135909-119159458	MANNHE	CTRL	80.694	103.066	0.35303	0.0491377	yes
FAM102A	11:98621302-98654751	MANNHE	CTRL	37.1812	47.5623	0.355242	0.0452589	yes
RPRD1A	24:21361883-21398837	MANNHE	CTRL	23.3736	29.9089	0.355694	0.0475014	yes
C10H5orf13	10:2161054-2193665	MANNHE	CTRL	31.7795	40.6658	0.355721	0.0487998	yes
MIIP	16:42537918-42548110	MANNHE	CTRL	40.811	52.2493	0.356453	0.0401201	yes
HLA-DOB	23:7054099-7063665	MANNHE	CTRL	92.9565	119.068	0.357154	0.0482283	yes
BOLA	23:28502520-28506312	MANNHE	CTRL	77.2409	99.0561	0.35888	0.047717	yes
RELB	18:53099705-53128176	MANNHE	CTRL	29.4305	37.7471	0.359054	0.0387061	yes
PEX10	16:51683115-51688676	MANNHE	CTRL	31.7061	40.6682	0.359138	0.0452589	yes
ABR	19:22287404-22431566	MANNHE	CTRL	31.4216	40.3168	0.359626	0.0421188	yes
SLC12A9	25:36325935-36335483	MANNHE	CTRL	26.7839	34.3753	0.360009	0.0454824	yes
RASAL3	7:8710305-8722576	MANNHE	CTRL	37.7151	48.4763	0.362137	0.0314941	yes
MOV10	3:30776859-30804255	MANNHE	CTRL	41.4439	53.2734	0.362256	0.0365834	yes
HGSNAT	27:37444199-37480020	MANNHE	CTRL	26.913	34.6035	0.362615	0.0373081	yes
FHOD1	18:34977243-34993391	MANNHE	CTRL	25.5613	32.8713	0.362871	0.0384246	yes
RAB35	17:64724240-64742928	MANNHE	CTRL	41.1434	52.9307	0.363445	0.0382118	yes
EGLN2	18:50331657-50334391	MANNHE	CTRL	28.3682	36.5127	0.364122	0.0493682	yes
SPI1	15:78402904-78419772	MANNHE	CTRL	62.7524	80.7931	0.364562	0.0349853	yes
ACAT1	15:17999931-18028987	MANNHE	CTRL	40.2707	51.8652	0.365035	0.0452589	yes
CALCOCO2	19:38314467-38330612	MANNHE	CTRL	69.1811	89.1228	0.365416	0.0365834	yes
BLCAP	13:67114711-67125197	MANNHE	CTRL	43.1822	55.6435	0.365776	0.0454824	yes
ATN1	5:103881476-103890158	MANNHE	CTRL	34.5175	44.4793	0.365803	0.0328844	yes
LOC506032	19:18141426-18203079	MANNHE	CTRL	20.837	26.8506	0.365809	0.0384246	yes
DENND1C	7:19220571-19229937	MANNHE	CTRL	84.3615	108.772	0.366648	0.0415535	yes
RNF44	7:39351902-39357420	MANNHE	CTRL	44.7728	57.7445	0.36706	0.0384246	yes
KCTD20	23:10355457-10391460	MANNHE	CTRL	36.5856	47.1862	0.367089	0.0370395	yes
ST3GAL2	18:1748256-1762838	MANNHE	CTRL	16.2243	20.9301	0.367421	0.0398602	yes
MORC3	1:150307576-150350455	MANNHE	CTRL	15.9309	20.5547	0.367642	0.0357811	yes
RAVER1	7:16073289-16086918	MANNHE	CTRL	48.7827	62.9464	0.367754	0.0370395	yes
ARPC5L	11:95859893-95867086	MANNHE	CTRL	199.309	257.206	0.367914	0.0379111	yes
COMMD8	6:67745740-67761255	MANNHE	CTRL	36.2898	46.8441	0.368304	0.0301007	yes
PML	21:34981852-35025090	MANNHE	CTRL	30.593	39.5	0.36865	0.0334095	yes
SLC7A6OS	18:35795186-35803175	MANNHE	CTRL	48.8816	63.1192	0.368788	0.0347232	yes
RNF19A	14:66242246-66298706	MANNHE	CTRL	41.1612	53.1684	0.369284	0.0331241	yes
TEC	6:68468926-68580129	MANNHE	CTRL	15.262	19.7292	0.370388	0.0491377	yes
LPXN	15:83203869-83245437	MANNHE	CTRL	73.6892	95.287	0.370825	0.0294844	yes
DCAF11	10:20855457-20863354	MANNHE	CTRL	41.8377	54.1176	0.371295	0.0287282	yes
LRRK2	5:40703488-40916225	MANNHE	CTRL	14.0056	18.1409	0.373244	0.0326586	yes
LOC618369	5:114068776-114094795	MANNHE	CTRL	10.9063	14.1265	0.373245	0.0448485	yes
FTSJD2	23:11303505-11356262	MANNHE	CTRL	25.313	32.7872	0.373255	0.0301007	yes
PDE3B	15:38463979-38626862	MANNHE	CTRL	27.7837	35.9984	0.373694	0.0349853	yes
CD4	5:103994654-104010513	MANNHE	CTRL	63.6375	82.4636	0.373881	0.0368375	yes
GUCY1B3	17:44506801-44569575	MANNHE	CTRL	63.7559	82.6325	0.374151	0.0360552	yes
CCR7	19:41428910-41440070	MANNHE	CTRL	132.389	171.607	0.374323	0.0401201	yes
PTK2	14:3870892-4065010	MANNHE	CTRL	16.3438	21.1946	0.37495	0.0306831	yes
NLRC3	25:2927061-2944136	MANNHE	CTRL	18.793	24.3708	0.374956	0.0328844	yes
MBD2	24:54044119-54093686	MANNHE	CTRL	160.095	207.67	0.375364	0.0309649	yes
RNF114	13:78733476-78747536	MANNHE	CTRL	67.7496	87.8862	0.375424	0.0282238	yes
LOC100848266	2:125010195-125012927	MANNHE	CTRL	26.6218	34.5406	0.375689	0.0309649	yes
C24H18orf1	24:43812093-43920134	MANNHE	CTRL	22.3037	28.9791	0.377731	0.0349853	yes
DOK1	11:10068277-10071090	MANNHE	CTRL	27.1297	35.2789	0.37893	0.0373081	yes
C6H4orf52	6:46975913-46988667	MANNHE	CTRL	65.7165	85.4804	0.379337	0.0314941	yes
PIP4K2A	13:23900872-24085889	MANNHE	CTRL	61.186	79.5897	0.379381	0.0312604	yes
MUM1	7:45407609-45422867	MANNHE	CTRL	26.1812	34.0607	0.379578	0.0246215	yes
2001-09-01	25:26817911-26821527	MANNHE	CTRL	117.223	152.661	0.381067	0.0255868	yes
HCLS1	1:66720532-66754184	MANNHE	CTRL	84.861	110.56	0.381662	0.0342272	yes
F2R	10:7879495-7897151	MANNHE	CTRL	21.7404	28.3295	0.381929	0.0249489	yes
MAP4K1	18:48633597-48647723	MANNHE	CTRL	90.8353	118.527	0.383896	0.0323846	yes
GPR132	21:71076846-71086364	MANNHE	CTRL	27.8355	36.3339	0.38439	0.027383	yes
NUSAP1	10:36906001-36936265	MANNHE	CTRL	33.1996	43.3511	0.384903	0.0255868	yes
ID3	2:129895412-129897012	MANNHE	CTRL	93.8467	122.545	0.384934	0.0294844	yes
ALS2	2:90663878-90712586	MANNHE	CTRL	5.56304	7.26683	0.385454	0.0401201	yes
IKBKB	27:36813225-36865781	MANNHE	CTRL	30.4461	39.7714	0.385475	0.0231682	yes
IL2RB	5:75927673-75967284	MANNHE	CTRL	40.7211	53.2269	0.386378	0.0231682	yes
ABP1	4:114249781-114262315	MANNHE	CTRL	31.8026	41.5713	0.386445	0.0331241	yes
FYB	20:35248346-35347530	MANNHE	CTRL	45.3913	59.3445	0.386699	0.0282238	yes
LEF1	6:18335030-18450774	MANNHE	CTRL	100.737	131.712	0.386799	0.0339772	yes
TSC1	11:102966709-103015706	MANNHE	CTRL	14.9838	19.5975	0.387267	0.0271219	yes
KIAA0232	6:118129539-118180636	MANNHE	CTRL	7.1604	9.3659	0.387378	0.0284911	yes
RAB4B	18:50314866-50323663	MANNHE	CTRL	73.4369	96.0971	0.387987	0.027383	yes
TMEM206	16:73040572-73075221	MANNHE	CTRL	30.3555	39.7562	0.389222	0.0289631	yes
CCNG2	6:93747763-93758040	MANNHE	CTRL	26.4303	34.658	0.390998	0.0240618	yes
TLR6	6:59686793-59720509	MANNHE	CTRL	18.9724	24.8838	0.391303	0.0264322	yes
PRKCH	10:73694667-73927124	MANNHE	CTRL	20.5675	26.9781	0.391426	0.0314941	yes
HECA	9:77890572-77910585	MANNHE	CTRL	52.1135	68.366	0.391622	0.0301007	yes
FPGT	3:70878976-70887093	MANNHE	CTRL	8.0334	10.5454	0.392532	0.047717	yes
PPP2R5A	16:73077107-73151753	MANNHE	CTRL	58.1741	76.4085	0.393357	0.0294844	yes
SLC7A6	18:35763842-35794542	MANNHE	CTRL	33.5096	44.0408	0.394269	0.0242926	yes
MOB1B	6:87976519-88035823	MANNHE	CTRL	6.24062	8.20584	0.394961	0.0357811	yes
NET1	13:43526440-43538233	MANNHE	CTRL	25.7315	33.8391	0.395157	0.0213665	yes
DHFR	7:83024152-83040758	MANNHE	CTRL	29.3321	38.5826	0.39547	0.0242926	yes
AKAP13	21:16597602-16916700	MANNHE	CTRL	34.1327	44.9019	0.395623	0.0482283	yes
SNX10	4:70049635-70117257	MANNHE	CTRL	20.3955	26.8456	0.396439	0.0298003	yes
TNFRSF4	16:52484467-52487312	MANNHE	CTRL	27.5656	36.3075	0.397399	0.0462476	yes
FBXL3	12:52466036-52477380	MANNHE	CTRL	16.8203	22.1615	0.397855	0.0246215	yes
SIT1	8:60238487-60240044	MANNHE	CTRL	136.916	180.409	0.397982	0.0197488	yes
PUS10	11:43539481-43608487	MANNHE	CTRL	10.9429	14.4223	0.398303	0.0370395	yes
L3MBTL3	9:69159348-69262025	MANNHE	CTRL	10.9915	14.4908	0.398751	0.0320632	yes
INPP5B	3:108596222-108650185	MANNHE	CTRL	37.0673	48.8763	0.398987	0.0175317	yes
IGF2	29:50046625-50065231	MANNHE	CTRL	25.657	33.8406	0.399406	0.0200859	yes
SLC25A20	22:51617497-51652558	MANNHE	CTRL	27.7441	36.5967	0.399536	0.0231682	yes
C13H20orf30	13:47779506-47787910	MANNHE	CTRL	46.9922	62.0003	0.399852	0.0203765	yes
EML5	10:101366895-101527481	MANNHE	CTRL	3.37394	4.45261	0.400217	0.0490113	yes
KIAA0226	1:70996321-71044883	MANNHE	CTRL	10.8687	14.3471	0.40059	0.0370395	yes
FAM175A	6:100013831-100031182	MANNHE	CTRL	20.9187	27.6144	0.40063	0.0355225	yes
LEMD2	23:7841999-7858371	MANNHE	CTRL	23.6671	31.2446	0.400725	0.0213665	yes
SDHAF2	29:40616948-40626488	MANNHE	CTRL	64.8357	85.6088	0.400971	0.019495	yes
PPP1R18	23:28128193-28137023	MANNHE	CTRL	57.0308	75.3489	0.401845	0.0203765	yes
LOC100847526	4:113696082-113696784	MANNHE	CTRL	167.092	220.894	0.40271	0.0148047	yes
GRAMD1A	18:45937192-45957026	MANNHE	CTRL	55.3953	73.2434	0.402934	0.0207311	yes
TMEM156	6:59823313-59866460	MANNHE	CTRL	63.8032	84.3787	0.403249	0.019495	yes
RALBP1	24:42040132-42080385	MANNHE	CTRL	42.5429	56.2898	0.403954	0.0114973	yes
PARP14	1:67613056-67659267	MANNHE	CTRL	27.0096	35.784	0.405841	0.0200859	yes
DTX3	5:56201576-56205137	MANNHE	CTRL	23.6282	31.3065	0.405956	0.0287282	yes
FADS2	29:41045231-41082249	MANNHE	CTRL	9.25137	12.2638	0.406668	0.0459866	yes
TSPAN14	28:36051346-36109016	MANNHE	CTRL	46.908	62.2632	0.408544	0.0148047	yes
VEGFB	29:43155132-43157956	MANNHE	CTRL	23.1239	30.7191	0.409753	0.0437803	yes
SLFN11	19:15129225-15141382	MANNHE	CTRL	14.645	19.4609	0.410168	0.0219925	yes
TADA3	22:16968212-16978442	MANNHE	CTRL	84.2181	111.933	0.410438	0.0154114	yes
HAUS4	10:21725200-21733001	MANNHE	CTRL	18.9015	25.1436	0.41169	0.0376098	yes
TNFAIP8	7:35812575-35858617	MANNHE	CTRL	50.2743	66.9008	0.412203	0.0129883	yes
PPP2R5C	21:68377170-68473922	MANNHE	CTRL	80.8946	107.673	0.412548	0.0264322	yes
SLC9A9	1:126040088-126704343	MANNHE	CTRL	9.44831	12.5767	0.412626	0.0282238	yes
ZCCHC3	13:61254415-61257121	MANNHE	CTRL	22.3737	29.8012	0.413565	0.017848	yes
IL16	21:27590363-27606711	MANNHE	CTRL	98.2612	130.931	0.414115	0.0222902	yes
RPRD1B	13:67570197-67628071	MANNHE	CTRL	17.2464	22.9911	0.414777	0.0114973	yes
FGD3	8:85820086-85852096	MANNHE	CTRL	46.6961	62.2619	0.415048	0.0148047	yes
NFKBIA	21:46065545-46068942	MANNHE	CTRL	114.412	152.635	0.415842	0.0137835	yes
MILR1	19:49269727-49292989	MANNHE	CTRL	46.2526	61.7332	0.416512	0.0141683	yes
SH3GLB2	11:99506997-99524044	MANNHE	CTRL	44.7351	59.7185	0.416771	0.0129883	yes
AXIN2	19:62834849-62860774	MANNHE	CTRL	11.2342	15.0001	0.417074	0.0191947	yes
TMSB4	1:51022807-51023449	MANNHE	CTRL	713.672	953.424	0.417857	0.0282238	yes
RBL2	18:21879670-21935039	MANNHE	CTRL	41.9484	56.0746	0.418734	0.027383	yes
USP25	1:20664457-20871441	MANNHE	CTRL	18.4541	24.6853	0.419708	0.0126481	yes
AXL	18:50677178-50710666	MANNHE	CTRL	17.1586	22.9552	0.41989	0.0171825	yes
POLH	23:17088032-17117040	MANNHE	CTRL	16.87	22.5718	0.420062	0.0154114	yes
PSTPIP1	21:32644739-32689060	MANNHE	CTRL	77.032	103.09	0.420377	0.00868468	yes
ADCK4	18:50252503-50270207	MANNHE	CTRL	21.6831	29.0192	0.420434	0.0191947	yes
LRRK1	21:5642544-5785655	MANNHE	CTRL	12.716	17.0246	0.420977	0.0103108	yes
HHEX	26:14120257-14126069	MANNHE	CTRL	25.7846	34.5236	0.421074	0.0203765	yes
SNX20	18:19157435-19166134	MANNHE	CTRL	14.0407	18.8285	0.423305	0.0255868	yes
CHURC1	10:77359721-77378296	MANNHE	CTRL	14.6061	19.5876	0.423369	0.0222902	yes
B3GNT2	11:60654633-60687732	MANNHE	CTRL	26.4624	35.4906	0.423494	0.00950032	yes
PLEKHF2	14:71515115-71535602	MANNHE	CTRL	61.4843	82.4714	0.423675	0.0122565	yes
MSH3	7:83040860-83186399	MANNHE	CTRL	24.1254	32.3645	0.423857	0.0314941	yes
LOC515042	2:131410539-131414758	MANNHE	CTRL	248.058	332.867	0.42427	0.0154114	yes
ID2	11:88584859-88587164	MANNHE	CTRL	62.6253	84.0658	0.424774	0.00745196	yes
TLR10	6:59670229-59677223	MANNHE	CTRL	9.57528	12.8542	0.424853	0.0334095	yes
GFI1	3:51104163-51112405	MANNHE	CTRL	16.4529	22.092	0.425182	0.019495	yes
NAPSA	18:56967953-56974402	MANNHE	CTRL	64.6363	86.7942	0.425254	0.0103108	yes
RAB4A	28:200774-243026	MANNHE	CTRL	17.2037	23.1071	0.425615	0.0454824	yes
LOC517126	3:12845014-12907593	MANNHE	CTRL	10.4193	14.0038	0.426561	0.0317565	yes
ITPRIPL1	11:2393383-2398016	MANNHE	CTRL	7.46612	10.0351	0.426617	0.027383	yes
SLC27A1	7:5532595-5571774	MANNHE	CTRL	10.1962	13.7085	0.427047	0.0261127	yes
CDADC1	12:18962898-18991285	MANNHE	CTRL	12.7159	17.0982	0.42721	0.0279965	yes
CD2	3:26584421-26598906	MANNHE	CTRL	96.7189	130.061	0.427318	0.0164566	yes
APBB1IP	13:18259063-18334728	MANNHE	CTRL	58.0767	78.1198	0.42773	0.00950032	yes
SNTB1	14:84251456-84624178	MANNHE	CTRL	7.14801	9.61632	0.427943	0.0249489	yes
FAS	26:10714193-10748026	MANNHE	CTRL	13.5437	18.2269	0.428451	0.0185216	yes
ITGB3	19:46968830-47030716	MANNHE	CTRL	9.1147	12.2681	0.428651	0.0154114	yes
INVS	8:65597444-65734342	MANNHE	CTRL	9.79133	13.1908	0.42995	0.0171825	yes
SLC25A30	12:15590374-15614506	MANNHE	CTRL	19.1363	25.7882	0.430395	0.0185216	yes
DBP	18:55722334-55729578	MANNHE	CTRL	12.6844	17.1005	0.430978	0.0398602	yes
BPNT1	16:24256259-24282901	MANNHE	CTRL	20.0896	27.0912	0.43138	0.0279965	yes
ARHGAP17	25:22843015-22936983	MANNHE	CTRL	39.0434	52.7158	0.433158	0.00950032	yes
DGKZ	15:77236629-77248741	MANNHE	CTRL	80.2052	108.311	0.433408	0.017848	yes
LOC784517	18:61327739-61341283	MANNHE	CTRL	27.5463	37.203	0.433559	0.0175317	yes
LOC786760	23:31379106-31387483	MANNHE	CTRL	14.4881	19.6004	0.436008	0.0185216	yes
EVL	21:66675973-66738876	MANNHE	CTRL	185.55	251.029	0.436049	0.0129883	yes
LOC788634	23:27694803-27718368	MANNHE	CTRL	28.4433	38.4848	0.436199	0.027383	yes
FUK	18:1681353-1694462	MANNHE	CTRL	10.5843	14.3213	0.436237	0.0137835	yes
C29H11orf75	29:1348487-1354061	MANNHE	CTRL	48.4145	65.5152	0.436391	0.0148047	yes
SESN1	9:41666966-41690063	MANNHE	CTRL	18.8268	25.4771	0.436416	0.0168208	yes
C9H6orf192	9:71927083-71962176	MANNHE	CTRL	8.38413	11.3489	0.436817	0.0331241	yes
XPC	22:58702023-58724970	MANNHE	CTRL	64.5417	87.3899	0.437235	0.0129883	yes
INPP5D	3:113403949-113541893	MANNHE	CTRL	62.478	84.6091	0.437464	0.0111208	yes
LAT	25:26120761-26125637	MANNHE	CTRL	112.973	153.037	0.437906	0.00950032	yes
GIMAP7	4:114075472-114086265	MANNHE	CTRL	103.508	140.252	0.438275	0.0133873	yes
ATP10D	6:67787937-67922536	MANNHE	CTRL	14.7402	19.9729	0.438288	0.00619986	yes
SEPHS2	25:26866846-26869142	MANNHE	CTRL	54.4038	73.7176	0.438301	0.00786391	yes
IER2	7:13543658-13545435	MANNHE	CTRL	121.465	164.735	0.439603	0.00826171	yes
CSAD	5:26985268-27013325	MANNHE	CTRL	8.79241	11.9303	0.440296	0.0363115	yes
ATP2A3	19:25163840-25198117	MANNHE	CTRL	96.9735	131.596	0.440456	0.0185216	yes
LYPLAL1	16:23350278-23382371	MANNHE	CTRL	7.96463	10.8114	0.440869	0.0389868	yes
LOC100848896	19:39432473-39441096	MANNHE	CTRL	12.9033	17.5208	0.44132	0.0314941	yes
CASP4	15:3474705-3494166	MANNHE	CTRL	33.2911	45.2051	0.441349	0.00660079	yes
LRRC8B	3:53852078-53862657	MANNHE	CTRL	8.41903	11.4333	0.441512	0.019495	yes
PAIP2	7:52252773-52284986	MANNHE	CTRL	139.876	190.031	0.442088	0.0118757	yes
UBASH3A	1:144257057-144297829	MANNHE	CTRL	21.8799	29.741	0.442849	0.00786391	yes
NEDD9	23:44955358-44986928	MANNHE	CTRL	10.8143	14.7099	0.443851	0.0171825	yes
RBM43	2:44961706-44973219	MANNHE	CTRL	23.1228	31.4546	0.443954	0.0103108	yes
RASGRP1	10:34202005-34280992	MANNHE	CTRL	28.2753	38.4723	0.44428	0.00786391	yes
H2AFV	4:77389292-77401089	MANNHE	CTRL	392.137	533.884	0.445169	0.00745196	yes
ZBTB24	9:41168309-41177175	MANNHE	CTRL	12.6961	17.291	0.445634	0.0114973	yes
FMNL3	5:30320680-30372554	MANNHE	CTRL	50.2499	68.4416	0.445754	0.00826171	yes
NLRC5	18:25126946-25185333	MANNHE	CTRL	35.6924	48.6143	0.445762	0.00703581	yes
LOC514011	21:59275186-59289639	MANNHE	CTRL	44.6698	60.8483	0.445919	0.0157571	yes
ZNF167	22:16415881-16443252	MANNHE	CTRL	7.89076	10.7489	0.445954	0.0237661	yes
ZBTB43	11:97582041-97608142	MANNHE	CTRL	8.33477	11.354	0.44599	0.0292104	yes
ZC3H12D	9:87840981-87862199	MANNHE	CTRL	30.7231	41.8599	0.446247	0.0111208	yes
PDK1	2:24065276-24107467	MANNHE	CTRL	18.4107	25.0868	0.44638	0.00868468	yes
C3H1orf54	3:20406681-20413546	MANNHE	CTRL	113.752	155.016	0.446523	0.0145064	yes
PRKCZ	16:51848096-51947503	MANNHE	CTRL	11.3766	15.5074	0.446883	0.0279965	yes
RGS3	8:104444148-104543027	MANNHE	CTRL	16.7559	22.8415	0.446993	0.00703581	yes
LOC540312	X:19420325-19477162	MANNHE	CTRL	5.09341	6.94363	0.447057	0.0347232	yes
ZNF705A	27:4996675-5000242	MANNHE	CTRL	16.3584	22.3075	0.447498	0.0181914	yes
RAB8B	10:46837287-46907334	MANNHE	CTRL	44.6174	60.8689	0.448101	0.0133873	yes
KLHL5	6:59908904-59981179	MANNHE	CTRL	18.0407	24.6184	0.448486	0.00660079	yes
TSC22D3	X:59707756-59774048	MANNHE	CTRL	98.6748	134.732	0.44934	0.0200859	yes
FBXO31	18:12970947-13009263	MANNHE	CTRL	21.9755	30.0152	0.449795	0.00786391	yes
RGS10	26:39976324-40017296	MANNHE	CTRL	65.3519	89.2797	0.450103	0.0126481	yes
FAM134B	20:56709602-56758648	MANNHE	CTRL	15.9747	21.8256	0.450231	0.0219925	yes
FAM76A	2:126188846-126219796	MANNHE	CTRL	13.0875	17.881	0.450242	0.0292104	yes
GABARAPL1	5:100205181-100215034	MANNHE	CTRL	41.3071	56.4766	0.451261	0.00786391	yes
SLC37A1	1:144364482-144437233	MANNHE	CTRL	27.1055	37.0733	0.451797	0.00703581	yes
PTMS	5:104039249-104040501	MANNHE	CTRL	286.991	392.54	0.451834	0.00703581	yes
DDIT4	28:28483402-28485434	MANNHE	CTRL	67.8198	92.801	0.452433	0.0237661	yes
NAMPT	4:47594641-47635332	MANNHE	CTRL	9.14526	12.5147	0.452527	0.0107181	yes
CD3D	15:29456438-29460605	MANNHE	CTRL	119.497	163.529	0.452573	0.00786391	yes
FMNL2	2:43649133-43979598	MANNHE	CTRL	5.33184	7.2969	0.452651	0.0148047	yes
BCAT1	5:85480246-85597791	MANNHE	CTRL	20.2948	27.7823	0.453057	0.0111208	yes
ABTB2	15:65546893-65736070	MANNHE	CTRL	4.95853	6.78987	0.453472	0.0210614	yes
ZNF572	14:16756963-16783575	MANNHE	CTRL	7.84013	10.7385	0.453848	0.0342272	yes
ARHGAP5	21:42937759-43004051	MANNHE	CTRL	3.30625	4.52869	0.453898	0.0154114	yes
TOX	14:26631186-26941726	MANNHE	CTRL	18.2829	25.0537	0.454524	0.00786391	yes
ICAM3	7:16087158-16094419	MANNHE	CTRL	26.6195	36.4905	0.455037	0.00911938	yes
MATK	7:21421293-21429294	MANNHE	CTRL	44.8093	61.426	0.45505	0.00826171	yes
GTF2B	3:55179368-55210380	MANNHE	CTRL	42.0738	57.689	0.455374	0.00660079	yes
LOC100848252	19:40774713-40776544	MANNHE	CTRL	74.5325	102.215	0.45567	0.00577637	yes
C21H15orf40	21:23721970-23728268	MANNHE	CTRL	14.6435	20.0838	0.455768	0.0282238	yes
KIF15	22:16553707-16610397	MANNHE	CTRL	13.3716	18.3565	0.457117	0.00619986	yes
USP54	28:29640818-29703405	MANNHE	CTRL	3.06952	4.21417	0.457236	0.0314941	yes
CCNI	6:93633304-93672214	MANNHE	CTRL	70.2281	96.4636	0.457935	0.00660079	yes
LIPA	26:10988283-11030717	MANNHE	CTRL	59.828	82.1861	0.458074	0.00492261	yes
ITK	7:70911161-70973274	MANNHE	CTRL	35.6042	48.9303	0.458683	0.00447872	yes
BTG1	5:22086068-22088781	MANNHE	CTRL	385.525	529.877	0.458832	0.0331241	yes
CD3G	15:29462565-29474059	MANNHE	CTRL	144.822	199.098	0.459205	0.00619986	yes
BATF3	16:72740450-72753761	MANNHE	CTRL	41.4467	56.9814	0.459235	0.0197488	yes
FLT3	12:32240365-32293430	MANNHE	CTRL	9.81086	13.502	0.46072	0.0129883	yes
PTGER4	20:33762477-33774648	MANNHE	CTRL	24.9293	34.3244	0.46139	0.00619986	yes
FAM158A	10:20844405-20846745	MANNHE	CTRL	40.2794	55.4729	0.461743	0.0148047	yes
ZNRF1	18:2396334-2482363	MANNHE	CTRL	73.2443	100.894	0.462058	0.00400408	yes
CD6	29:37892664-37937146	MANNHE	CTRL	22.4415	30.9168	0.462224	0.00911938	yes
ADCY6	5:31160698-31176231	MANNHE	CTRL	5.17042	7.124	0.462405	0.0157571	yes
CP	1:119896117-119943427	MANNHE	CTRL	29.9109	41.2298	0.463016	0.00745196	yes
LOC618268	18:57867839-57880065	MANNHE	CTRL	11.4479	15.7808	0.463091	0.0368375	yes
TAF1A	16:26747500-26779536	MANNHE	CTRL	14.1924	19.5684	0.463403	0.0216807	yes
HDAC8	X:83228462-83475077	MANNHE	CTRL	22.5223	31.0695	0.464147	0.00950032	yes
FBXO7	5:71448943-71469171	MANNHE	CTRL	17.9338	24.741	0.464224	0.00534264	yes
C5H12orf75	5:69161771-69206621	MANNHE	CTRL	20.6558	28.5108	0.46496	0.0216807	yes
IFI16	3:10821556-10866317	MANNHE	CTRL	86.2953	119.151	0.465432	0.00660079	yes
EPHX1	16:29585791-29624039	MANNHE	CTRL	24.3041	33.5692	0.465941	0.0103108	yes
MTF2	3:50490448-50560463	MANNHE	CTRL	16.7234	23.1097	0.466628	0.00660079	yes
TPRKB	11:10862326-10869029	MANNHE	CTRL	32.2222	44.5332	0.466829	0.00868468	yes
LOC513555	8:102501863-102627787	MANNHE	CTRL	16.6523	23.0195	0.467136	0.00826171	yes
ZFP36L2	11:25583530-25587785	MANNHE	CTRL	100.53	139.017	0.467644	0.0118757	yes
ZSWIM7	19:34074735-34084352	MANNHE	CTRL	16.8882	23.3539	0.467648	0.0175317	yes
SETMAR	22:22108896-22119730	MANNHE	CTRL	15.8148	21.8696	0.46765	0.0242926	yes
CMPK2	11:90042246-90059038	MANNHE	CTRL	8.52638	11.791	0.467687	0.0154114	yes
TRNAU1AP	2:125439382-125462744	MANNHE	CTRL	25.5184	35.2967	0.467994	0.0148047	yes
SAP25	25:36518752-36520455	MANNHE	CTRL	65.3843	90.567	0.470041	0.00351112	yes
LOC100847122	1:79783101-79786112	MANNHE	CTRL	7.53837	10.4432	0.470237	0.0203765	yes
PVRIG	25:36726018-36729802	MANNHE	CTRL	46.9862	65.1221	0.47091	0.00298038	yes
KIAA0922	17:3991588-4165391	MANNHE	CTRL	44.0786	61.0982	0.47105	0.00786391	yes
C13H20orf94	13:3599984-3818951	MANNHE	CTRL	4.47377	6.20359	0.471613	0.0171825	yes
SERPINE2	2:112869803-112940143	MANNHE	CTRL	37.5536	52.0784	0.471736	0.00492261	yes
DOPEY2	1:150169935-150293895	MANNHE	CTRL	3.8255	5.30971	0.472982	0.0151595	yes
DAPP1	6:26167966-26224688	MANNHE	CTRL	30.6515	42.5471	0.473103	0.00298038	yes
TWSG1	24:41986505-42008182	MANNHE	CTRL	17.9123	24.8778	0.473906	0.00660079	yes
TBCC	23:16404939-16407589	MANNHE	CTRL	32.6209	45.3501	0.475306	0.00400408	yes
ZNF187	23:30160144-30171363	MANNHE	CTRL	7.35849	10.2332	0.475771	0.0228901	yes
ITGAL	25:26910551-26960485	MANNHE	CTRL	56.6451	78.8091	0.476411	0.00246199	yes
NCALD	14:64875134-64898581	MANNHE	CTRL	9.67819	13.4835	0.478383	0.0228901	yes
FAM116B	5:119874458-119885163	MANNHE	CTRL	12.8396	17.906	0.479846	0.0118757	yes
HSD17B4	7:35662598-35763607	MANNHE	CTRL	23.8526	33.2721	0.480168	0.00246199	yes
ANXA11	28:35318689-35360793	MANNHE	CTRL	59.3507	82.7915	0.480218	0.00492261	yes
RBMX2	X:68131800-68142216	MANNHE	CTRL	43.9282	61.3088	0.480948	0.000721596	yes
TMEM48	3:92962929-93020672	MANNHE	CTRL	9.98747	13.9421	0.481252	0.0114973	yes
INPPL1	15:52609011-52627543	MANNHE	CTRL	41.6629	58.1866	0.481921	0.00492261	yes
PSMF1	13:60505461-60544959	MANNHE	CTRL	33.9261	47.3863	0.482075	0.00534264	yes
BCL11A	11:43071975-43174031	MANNHE	CTRL	13.1218	18.331	0.482319	0.0249489	yes
LOC787476	X:14294116-14368145	MANNHE	CTRL	1.57861	2.2065	0.483106	0.00826171	yes
MB21D1	9:13153028-13188282	MANNHE	CTRL	3.8241	5.348	0.483877	0.0337098	yes
DIS3L	10:13162026-13194339	MANNHE	CTRL	52.888	74.0138	0.484852	0.00298038	yes
SWAP70	15:43509668-43585976	MANNHE	CTRL	70.581	98.7961	0.485173	0.00351112	yes
SLAMF6	3:9272203-9293450	MANNHE	CTRL	103.343	144.715	0.485776	0.00246199	yes
ESPNL	3:118074854-118096926	MANNHE	CTRL	9.11256	12.7651	0.486272	0.0145064	yes
AMN1	5:78552286-78637341	MANNHE	CTRL	23.8672	33.4685	0.487775	0.00447872	yes
TMEM180	26:22945833-22960683	MANNHE	CTRL	26.5841	37.2823	0.487929	0.00492261	yes
TRIM34	15:48531197-48545433	MANNHE	CTRL	52.2621	73.3403	0.488839	0.00298038	yes
ABCB1	4:32966205-33095480	MANNHE	CTRL	3.53185	4.95881	0.489572	0.0197488	yes
LCK	2:122092888-122113823	MANNHE	CTRL	133.312	187.174	0.489573	0.00447872	yes
CD22	18:46228137-46239458	MANNHE	CTRL	104.611	146.921	0.490011	0.00577637	yes
TMEM150C	6:99050254-99068751	MANNHE	CTRL	12.7368	17.8979	0.490788	0.00660079	yes
CNR2	2:129597585-129634311	MANNHE	CTRL	15.051	21.1526	0.490974	0.00534264	yes
LOC781494	21:20176382-20183768	MANNHE	CTRL	18.5613	26.0922	0.491322	0.00950032	yes
BRWD1	1:140741646-140863405	MANNHE	CTRL	7.60864	10.6975	0.491566	0.00246199	yes
DCAF12	8:76828791-76868169	MANNHE	CTRL	36.737	51.6602	0.49182	0.00351112	yes
CCDC50	1:76545411-76624452	MANNHE	CTRL	48.8744	68.748	0.492239	0.00246199	yes
BOLA-DQA1	23:25350796-25356970	MANNHE	CTRL	180.278	253.67	0.492733	0.0342272	yes
SNX30	8:103709671-103811065	MANNHE	CTRL	5.41461	7.62467	0.493816	0.030683	yes
GIMAP6	4:114062316-114064508	MANNHE	CTRL	194.809	274.341	0.493911	0.00660079	yes
TMEM131	11:3081424-3265589	MANNHE	CTRL	24.1666	34.0469	0.494511	0.00135308	yes
LOC786352	5:74640398-74666085	MANNHE	CTRL	28.536	40.2042	0.494563	0.00298038	yes
FCRL1	3:12615412-12647993	MANNHE	CTRL	28.1794	39.7443	0.496106	0.00193035	yes
HLA-DMA	23:7204349-7207401	MANNHE	CTRL	142.201	200.604	0.496413	0.00246199	yes
DEK	23:39133609-39165307	MANNHE	CTRL	120.426	170.057	0.497878	0.00619986	yes
GDA	8:48658280-48782109	MANNHE	CTRL	8.26131	11.6684	0.498166	0.0289631	yes
LOC535643	3:100674143-100880937	MANNHE	CTRL	9.28894	13.132	0.499505	0.00351112	yes
GTDC1	2:52552245-52897805	MANNHE	CTRL	6.05897	8.5658	0.499515	0.027383	yes
DST	23:3281537-3688415	MANNHE	CTRL	3.90493	5.5222	0.499949	0.00193035	yes
STAT2	5:57321721-57335220	MANNHE	CTRL	23.3741	33.0726	0.500725	0.00492261	yes
C8H9orf100	8:60247499-60251092	MANNHE	CTRL	22.1105	31.2927	0.501096	0.0107181	yes
SYNGR2	19:54611055-54614829	MANNHE	CTRL	151.027	213.851	0.501796	0.00246199	yes
LOC100140950	5:74961957-74972024	MANNHE	CTRL	26.5466	37.5995	0.502184	0.00660079	yes
STAMBPL1	26:10597572-10650148	MANNHE	CTRL	19.419	27.5284	0.503452	0.00619986	yes
LOC511617	4:113763389-113768447	MANNHE	CTRL	59.8846	84.9386	0.504236	0.00135308	yes
GRAP	19:34796321-34817317	MANNHE	CTRL	96.6617	137.24	0.505681	0.00246199	yes
ADORA3	3:31900283-31986508	MANNHE	CTRL	20.005	28.423	0.506697	0.00660079	yes
ZNF70	17:73192297-73200540	MANNHE	CTRL	3.40893	4.84909	0.508394	0.0114973	yes
DACT1	10:71152289-71162896	MANNHE	CTRL	4.74395	6.75081	0.508972	0.00993052	yes
KCND1	X:92147627-92153617	MANNHE	CTRL	10.3302	14.7013	0.509085	0.00950032	yes
GNG5	3:59783838-59791977	MANNHE	CTRL	193.785	276.002	0.510222	0.00193035	yes
EHD3	11:68632155-68661110	MANNHE	CTRL	63.9806	91.1695	0.510915	0.00193035	yes
KCNN3	3:15780761-15949005	MANNHE	CTRL	8.50729	12.125	0.511214	0.0118757	yes
FAM118A	5:116447251-116460623	MANNHE	CTRL	14.85	21.1719	0.511691	0.00400408	yes
UBE2D4	22:322995-343684	MANNHE	CTRL	19.975	28.4844	0.511974	0.00786391	yes
INPP4B	17:15685434-16116848	MANNHE	CTRL	9.06073	12.9256	0.512535	0.00447872	yes
RPL36	7:19833359-19834633	MANNHE	CTRL	1469.42	2097.91	0.513703	0.00298038	yes
RRAS2	15:38900250-38977399	MANNHE	CTRL	20.5548	29.3801	0.515364	0.00492261	yes
CISH	22:50320204-50325618	MANNHE	CTRL	16.0813	23.0243	0.517769	0.00619986	yes
LOC529196	22:53826231-53832796	MANNHE	CTRL	6.06065	8.68246	0.518632	0.0141683	yes
SUSD3	8:85876232-85895982	MANNHE	CTRL	67.308	96.4411	0.518871	0.000721596	yes
KLF11	11:87525612-87536326	MANNHE	CTRL	4.7757	6.84405	0.519138	0.0114973	yes
LOC530077	4:114148173-114155505	MANNHE	CTRL	76.3821	109.465	0.519167	0.00193035	yes
BPHL	23:50394969-50417071	MANNHE	CTRL	18.4736	26.4877	0.51986	0.0412976	yes
ADCK1	10:90002635-90134651	MANNHE	CTRL	4.25427	6.10231	0.520442	0.046727	yes
MAGEF1	1:83090389-83091984	MANNHE	CTRL	17.3663	24.9102	0.520445	0.00492261	yes
TSPAN33	4:93881395-93901224	MANNHE	CTRL	11.7158	16.812	0.52103	0.00492261	yes
LY6E	14:2624757-2628462	MANNHE	CTRL	162.407	233.104	0.521364	0.00135308	yes
LIMD2	19:48624046-48625915	MANNHE	CTRL	272.801	391.861	0.522494	0.000721596	yes
S1PR3	8:90649979-90663196	MANNHE	CTRL	12.6051	18.1267	0.524109	0.00193035	yes
LOC615257	23:26688280-26690858	MANNHE	CTRL	5.61552	8.07556	0.524143	0.0326586	yes
RHOBTB2	8:70804357-70817394	MANNHE	CTRL	7.08184	10.1994	0.526289	0.0216807	yes
TRAF5	16:73894531-73939371	MANNHE	CTRL	17.7905	25.6507	0.52789	0.00193035	yes
PTAFR	2:125808443-125809472	MANNHE	CTRL	22.0225	31.7572	0.528108	0.0103108	yes
HMGN1	23:29403152-29403978	MANNHE	CTRL	314.786	454.013	0.528361	0.00351112	yes
LOC783604	3:55024388-55046199	MANNHE	CTRL	7.09376	10.2334	0.528661	0.0141683	yes
ADAR	3:16025764-16054451	MANNHE	CTRL	34.6234	49.9785	0.52956	0.000721596	yes
NKG7	18:57812521-57815252	MANNHE	CTRL	37.3265	53.9027	0.530158	0.00193035	yes
POLM	4:77910508-77918761	MANNHE	CTRL	5.5984	8.0846	0.530163	0.0421188	yes
TLR3	27:15232458-15243399	MANNHE	CTRL	9.04224	13.0639	0.530831	0.00534264	yes
GPD1	5:29958500-29964085	MANNHE	CTRL	9.64494	13.9546	0.532897	0.0151595	yes
METTL7A	5:29161689-29172757	MANNHE	CTRL	7.76541	11.2404	0.533553	0.0175317	yes
ANKRD13A	17:65517936-65552128	MANNHE	CTRL	44.0408	63.7976	0.534662	0.000721596	yes
PAX5	8:61399752-61580320	MANNHE	CTRL	12.8683	18.6499	0.535352	0.00577637	yes
KIAA0240	23:16478579-16512839	MANNHE	CTRL	12.6807	18.3917	0.536423	0.00135308	yes
IRF1	7:23235652-23314073	MANNHE	CTRL	71.6346	103.909	0.536598	0.00135308	yes
LIME1	13:54506702-54509118	MANNHE	CTRL	13.3214	19.3261	0.536811	0.0181914	yes
ALPK3	21:22876991-22937388	MANNHE	CTRL	2.10336	3.05175	0.536944	0.0151595	yes
SLC24A6	17:63561382-63591370	MANNHE	CTRL	17.6613	25.645	0.538087	0.000721596	yes
LOC516599	15:48506849-48521081	MANNHE	CTRL	9.31596	13.528	0.53817	0.0137835	yes
LOC507236	23:29855533-29868093	MANNHE	CTRL	2.73168	3.96776	0.538536	0.0349853	yes
OGFRL1	9:10634447-10645611	MANNHE	CTRL	7.40885	10.7706	0.539779	0.0452589	yes
LOC100848191	18:50173267-50202362	MANNHE	CTRL	3.07035	4.46492	0.540228	0.0197488	yes
LOC614741	28:4121684-4484474	MANNHE	CTRL	1.41236	2.05469	0.540815	0.0355225	yes
COL7A1	22:51859651-51889954	MANNHE	CTRL	1.24185	1.8078	0.541736	0.017848	yes
EYA3	2:125899098-125970014	MANNHE	CTRL	16.2703	23.6998	0.542629	0.00135308	yes
CIRBP	7:45354485-45359177	MANNHE	CTRL	58.6205	85.426	0.54327	0.00135308	yes
POLL	26:22197460-22205845	MANNHE	CTRL	12.553	18.2988	0.543724	0.00246199	yes
CLU	8:11043940-11061303	MANNHE	CTRL	579.881	845.831	0.544613	0.0197488	yes
ANPEP	21:21620135-21637144	MANNHE	CTRL	3.35229	4.89004	0.544701	0.0181914	yes
PARP1	16:30119201-30160574	MANNHE	CTRL	78.8896	115.099	0.544962	0.00135308	yes
VSIG10	17:59371540-59411035	MANNHE	CTRL	4.48528	6.54422	0.545024	0.0334095	yes
TAP2	23:7102159-7108985	MANNHE	CTRL	24.905	36.3452	0.545332	0.000721596	yes
LOC100337484	12:87678739-87694938	MANNHE	CTRL	7.08428	10.3452	0.54627	0.00868468	yes
EED	29:9325132-9355669	MANNHE	CTRL	56.4289	82.4241	0.546631	0.000721596	yes
LOC100335205	4:83280275-83318437	MANNHE	CTRL	11.1143	16.2364	0.546816	0.00193035	yes
PHF6	X:18048825-18085910	MANNHE	CTRL	15.905	23.2392	0.547079	0.00745196	yes
CD37	18:56276468-56295723	MANNHE	CTRL	150.039	219.396	0.548204	0.00135308	yes
RBCK1	13:61147246-61164402	MANNHE	CTRL	65.8886	96.3717	0.548582	0.000721596	yes
LOC528154	4:114107003-114109395	MANNHE	CTRL	8.56714	12.5334	0.548888	0.0464675	yes
GALM	11:21040424-21095040	MANNHE	CTRL	8.03624	11.7743	0.551049	0.00447872	yes
SPP1	6:38120577-38127541	MANNHE	CTRL	52.0044	76.2556	0.552209	0.00135308	yes
LOC100847108	1:79025392-79026180	MANNHE	CTRL	19.9434	29.2506	0.552551	0.0207311	yes
GALNT3	2:30642214-30666124	MANNHE	CTRL	3.95647	5.81513	0.555598	0.0197488	yes
CD3E	15:29441566-29452182	MANNHE	CTRL	327.764	481.792	0.555755	0.00246199	yes
RFTN1	1:155017756-155283662	MANNHE	CTRL	51.0711	75.1177	0.556647	0.000721596	yes
AIF1	23:27490998-27523803	MANNHE	CTRL	101.865	149.955	0.557871	0.0137835	yes
CRTAM	15:33993513-34022261	MANNHE	CTRL	21.2464	31.3005	0.558967	0.000721596	yes
FCGR3A	3:7996510-8005232	MANNHE	CTRL	43.1068	63.5389	0.559725	0.00246199	yes
LOC782527	9:57504329-57517737	MANNHE	CTRL	13.8869	20.4699	0.55978	0.00298038	yes
RNF8	23:11229764-11267154	MANNHE	CTRL	27.6803	40.8138	0.560194	0.000721596	yes
GIMAP1	4:114111961-114116538	MANNHE	CTRL	74.0343	109.184	0.560498	0.000721596	yes
SUGP2	7:4113895-4142926	MANNHE	CTRL	37.8101	55.7689	0.56069	0.00135308	yes
CPT1B	5:120098391-120106718	MANNHE	CTRL	2.76	4.07134	0.560834	0.0317565	yes
LOC100848703	17:18573972-18576567	MANNHE	CTRL	8.33546	12.2968	0.560945	0.00619986	yes
MTMR9	8:7831435-7899876	MANNHE	CTRL	22.424	33.0989	0.561737	0.000721596	yes
DPYSL3	7:60588656-60703487	MANNHE	CTRL	6.90744	10.1974	0.561978	0.00246199	yes
GPR174	X:78186588-78188379	MANNHE	CTRL	51.391	75.8738	0.562086	0.00135308	yes
DTNBP1	23:41076274-41165361	MANNHE	CTRL	31.3018	46.217	0.562179	0.00135308	yes
LAMP3	1:84536352-84560383	MANNHE	CTRL	91.8563	135.626	0.562184	0.00135308	yes
PDCD1LG2	8:39397109-39460958	MANNHE	CTRL	10.2882	15.1922	0.562341	0.00135308	yes
MAP3K8	13:35600312-35626617	MANNHE	CTRL	14.2956	21.1104	0.56238	0.000721596	yes
MYO6	9:15639155-15765683	MANNHE	CTRL	2.46608	3.64263	0.562761	0.00660079	yes
TMC4	18:63412388-63421511	MANNHE	CTRL	17.692	26.1503	0.563729	0.00135308	yes
TFDP2	1:127977929-128027258	MANNHE	CTRL	8.55454	12.653	0.564712	0.0157571	yes
VRK3	18:56748765-56784317	MANNHE	CTRL	10.5398	15.5925	0.565004	0.00492261	yes
SLCO3A1	21:15205585-15584700	MANNHE	CTRL	5.48432	8.12604	0.56724	0.0154114	yes
EGR1	7:51438971-51441815	MANNHE	CTRL	20.6667	30.6357	0.567901	0.000721596	yes
MICAL1	9:41186214-41197421	MANNHE	CTRL	29.0898	43.1364	0.568395	0.000721596	yes
LOC100847396	X:18095591-18099192	MANNHE	CTRL	19.8821	29.5062	0.569545	0.000721596	yes
APOBEC3B	5:111073492-111088527	MANNHE	CTRL	25.5598	37.9639	0.570755	0.000721596	yes
PHF11	12:19150793-19184695	MANNHE	CTRL	50.7301	75.3712	0.571172	0.000721596	yes
EEPD1	4:61354647-61476979	MANNHE	CTRL	5.66059	8.41958	0.572796	0.00745196	yes
SLC6A6	22:58448091-58494800	MANNHE	CTRL	5.86961	8.74048	0.574447	0.0160992	yes
NTRK3	21:19222945-19643577	MANNHE	CTRL	3.07627	4.5813	0.574578	0.0154114	yes
OMG	19:19044109-19046817	MANNHE	CTRL	5.97579	8.90707	0.57582	0.0133873	yes
LGALS8	28:9210586-9239723	MANNHE	CTRL	11.1394	16.6333	0.5784	0.00619986	yes
PRAM1	7:18331126-18339617	MANNHE	CTRL	4.91615	7.34214	0.578671	0.0103108	yes
C6H4orf34	6:60277933-60336533	MANNHE	CTRL	36.504	54.6201	0.581379	0.000721596	yes
TMEM106C	5:32486383-32491855	MANNHE	CTRL	23.8756	35.7314	0.581654	0.000721596	yes
FKBP5	23:9521253-9637802	MANNHE	CTRL	48.4643	72.5863	0.582777	0.000721596	yes
PITPNC1	19:49840268-50103779	MANNHE	CTRL	7.3373	11.0045	0.584774	0.00492261	yes
STEAP2	4:74886595-74911781	MANNHE	CTRL	3.08176	4.62318	0.585134	0.0365834	yes
MYOC	16:39957132-39971282	MANNHE	CTRL	3.18015	4.77093	0.585176	0.0368375	yes
HELQ	6:99966408-100006336	MANNHE	CTRL	12.1205	18.1851	0.585304	0.000721596	yes
CD69	5:100740573-100747670	MANNHE	CTRL	40.4527	60.6975	0.585402	0.000721596	yes
LONRF1	27:23317247-23362932	MANNHE	CTRL	4.62024	6.9328	0.585469	0.00534264	yes
CENPV	19:33878336-33886580	MANNHE	CTRL	9.81789	14.7536	0.587581	0.0225854	yes
IFITM10	29:50450556-50460525	MANNHE	CTRL	16.837	25.3052	0.5878	0.00619986	yes
SLC15A1	12:79605250-79652128	MANNHE	CTRL	3.3137	4.98228	0.588363	0.0191947	yes
CD8A	11:47988322-47995394	MANNHE	CTRL	40.7956	61.3487	0.58862	0.000721596	yes
LY75	2:36557430-36647994	MANNHE	CTRL	27.1072	40.7773	0.589092	0.000721596	yes
TMEM229B	10:79690914-79713922	MANNHE	CTRL	18.4207	27.7106	0.589108	0.000721596	yes
APOL3	5:74974806-74986756	MANNHE	CTRL	5.37102	8.08056	0.589258	0.0122565	yes
CCND3	23:15707548-15714372	MANNHE	CTRL	138.403	208.316	0.589904	0.000721596	yes
LOC786372	3:54077496-54094992	MANNHE	CTRL	22.4921	33.856	0.589996	0.000721596	yes
STAT4	2:79939326-80041309	MANNHE	CTRL	23.3734	35.2065	0.590971	0.000721596	yes
C9H6orf70	9:105128746-105157156	MANNHE	CTRL	21.4693	32.376	0.592652	0.000721596	yes
LOC785867	8:70833742-70851224	MANNHE	CTRL	5.22144	7.87689	0.59318	0.00447872	yes
ZFPM1	18:13810240-13826908	MANNHE	CTRL	2.96799	4.47815	0.593416	0.0145064	yes
CLGN	17:17575018-17620101	MANNHE	CTRL	4.17684	6.30945	0.595101	0.00911938	yes
SEMA4A	3:14659268-14679216	MANNHE	CTRL	54.1191	81.7511	0.595101	0.000721596	yes
HERC5	6:37683702-37728602	MANNHE	CTRL	6.70273	10.1255	0.595178	0.00246199	yes
GPR114	18:25608274-25634382	MANNHE	CTRL	21.1384	31.934	0.59523	0.000721596	yes
GK5	1:127736165-127814894	MANNHE	CTRL	4.6619	7.0474	0.596174	0.0216807	yes
ATP4B	12:90758091-90763021	MANNHE	CTRL	11.799	17.8517	0.597393	0.00619986	yes
PARP9	1:67559263-67597019	MANNHE	CTRL	20.6361	31.2313	0.597821	0.00351112	yes
ERAP2	7:98715724-98767730	MANNHE	CTRL	29.7949	45.0942	0.597877	0.000721596	yes
RGS9	19:62614365-62656129	MANNHE	CTRL	5.32744	8.07174	0.599437	0.00660079	yes
P2RX5	19:24980653-24996301	MANNHE	CTRL	46.9631	71.1578	0.599495	0.000721596	yes
ZNF613	18:58100733-58141900	MANNHE	CTRL	7.84604	11.9065	0.601717	0.00193035	yes
BFAR	25:13640453-13672233	MANNHE	CTRL	30.1408	45.7424	0.601813	0.000721596	yes
HPGD	8:6642814-6680546	MANNHE	CTRL	2.92267	4.43989	0.603238	0.0242926	yes
GATA3	13:15984585-16002940	MANNHE	CTRL	6.59036	10.0126	0.60339	0.00619986	yes
SCN4B	15:29257442-29277309	MANNHE	CTRL	1.23616	1.87829	0.603559	0.0384246	yes
STX7	9:71381756-71455585	MANNHE	CTRL	67.8985	103.197	0.603943	0.000721596	yes
RAB27A	10:55134043-55160887	MANNHE	CTRL	35.9887	54.7253	0.604665	0.000721596	yes
CLEC4F	11:13584913-13596922	MANNHE	CTRL	49.6157	75.5255	0.606168	0.000721596	yes
LAX1	16:1327007-1335059	MANNHE	CTRL	16.9453	25.8014	0.606562	0.000721596	yes
THEMIS	9:66796725-66885925	MANNHE	CTRL	8.84303	13.4744	0.607604	0.00193035	yes
ARHGAP22	28:43203812-43331571	MANNHE	CTRL	4.87344	7.42772	0.607978	0.00660079	yes
NCF2	16:66081121-66113913	MANNHE	CTRL	34.6124	52.7588	0.608122	0.000721596	yes
LOC515736	22:12707029-12724264	MANNHE	CTRL	9.20448	14.0303	0.608135	0.0164566	yes
LTB	23:27529853-27531882	MANNHE	CTRL	473.995	724.092	0.611302	0.000721596	yes
TERT	20:71263286-71279911	MANNHE	CTRL	6.54657	10.0041	0.611787	0.00135308	yes
ARHGAP39	14:1563865-1600378	MANNHE	CTRL	7.05227	10.7847	0.612831	0.000721596	yes
MXD3	7:40136163-40140496	MANNHE	CTRL	18.424	28.1882	0.613508	0.00246199	yes
COMMD4	21:33872677-33878146	MANNHE	CTRL	51.8315	79.3202	0.613859	0.000721596	yes
CCDC138	11:44478968-44508087	MANNHE	CTRL	5.10525	7.81331	0.61395	0.00619986	yes
TIFA	6:14410554-14419294	MANNHE	CTRL	51.9146	79.5022	0.614855	0.000721596	yes
GPR34	X:107157274-107531277	MANNHE	CTRL	14.8385	22.7364	0.61566	0.0114973	yes
P2RY10	X:78379313-78398023	MANNHE	CTRL	43.6803	66.9639	0.6164	0.000721596	yes
UPB1	17:73500517-73527334	MANNHE	CTRL	4.11642	6.31353	0.617054	0.0289631	yes
MFGE8	21:20889910-20904940	MANNHE	CTRL	34.3141	52.6702	0.618184	0.000721596	yes
IRF9	10:20820963-20825564	MANNHE	CTRL	46.5728	71.5175	0.61881	0.000721596	yes
LAP3	6:38574589-38600027	MANNHE	CTRL	91.5958	140.674	0.619005	0.000721596	yes
EFHD1	3:113006124-113050193	MANNHE	CTRL	4.75819	7.309	0.619263	0.0111208	yes
LOC100848000	X:78191555-78223737	MANNHE	CTRL	19.0095	29.2093	0.619703	0.00786391	yes
LOC100847800	11:98689996-98708682	MANNHE	CTRL	3.95393	6.08086	0.620986	0.0368375	yes
KCTD11	19:27685378-27688137	MANNHE	CTRL	3.93727	6.05663	0.621322	0.00826171	yes
SNN	25:10417664-10425321	MANNHE	CTRL	48.2284	74.2046	0.621628	0.000721596	yes
SPOCK2	28:28304693-28329944	MANNHE	CTRL	118.293	182.166	0.622891	0.000721596	yes
HLA-DMB	23:7186800-7193645	MANNHE	CTRL	142.926	220.231	0.62375	0.000721596	yes
LOC790811	23:28330608-28334078	MANNHE	CTRL	590.025	910.027	0.625133	0.000721596	yes
CDCA7	2:23377566-23390741	MANNHE	CTRL	75.0453	115.782	0.625573	0.000721596	yes
GBP7	3:54031911-54057530	MANNHE	CTRL	13.9471	21.5484	0.627615	0.000721596	yes
CTPS2	X:134046107-134155814	MANNHE	CTRL	17.9879	27.8132	0.628745	0.000721596	yes
SALL2	10:25704581-25709759	MANNHE	CTRL	3.28484	5.08198	0.62957	0.0240618	yes
LOC100848273	7:7885876-7896884	MANNHE	CTRL	32.2059	49.8427	0.63006	0.000721596	yes
RBM38	13:59293230-59308867	MANNHE	CTRL	46.1421	71.5415	0.632696	0.000721596	yes
COL22A1	14:5154836-5353886	MANNHE	CTRL	2.93994	4.56183	0.633826	0.00298038	yes
TRANK1	22:10648102-10723460	MANNHE	CTRL	14.3632	22.289	0.633947	0.000721596	yes
LOC788142	3:20871005-20901649	MANNHE	CTRL	3.86315	5.99657	0.634361	0.0235051	yes
PLIN1	21:21502823-21516686	MANNHE	CTRL	1.84544	2.86498	0.634561	0.0328844	yes
RRM2B	14:64315311-64352488	MANNHE	CTRL	8.39227	13.038	0.635585	0.00745196	yes
LOC100848507	18:13009445-13012783	MANNHE	CTRL	3.64221	5.65891	0.63571	0.0154114	yes
USP18	5:76388592-76404941	MANNHE	CTRL	21.2226	33.0234	0.637889	0.000721596	yes
MGC148762	21:20084896-20092403	MANNHE	CTRL	5.54344	8.63153	0.638834	0.0242926	yes
KCNN4	18:52303107-52316896	MANNHE	CTRL	9.5388	14.8558	0.639146	0.00193035	yes
LOC100848913	8:99783969-99804459	MANNHE	CTRL	46.2559	72.1831	0.642024	0.00745196	yes
ENO3	19:27073495-27078655	MANNHE	CTRL	13.3971	20.9067	0.642047	0.00193035	yes
TRAT1	1:53995475-54043196	MANNHE	CTRL	16.5177	25.8153	0.64421	0.000721596	yes
ITGAE	19:25003636-25047424	MANNHE	CTRL	8.18369	12.7953	0.644791	0.000721596	yes
LOC515697	5:74673522-74688916	MANNHE	CTRL	15.5075	24.2498	0.645	0.000721596	yes
COL11A2	23:7290454-7318840	MANNHE	CTRL	1.26307	1.97604	0.645681	0.0287282	yes
DEPDC1	3:77093221-77113289	MANNHE	CTRL	2.7082	4.23731	0.645814	0.0164566	yes
MGC157082	18:61317192-61327422	MANNHE	CTRL	6.89561	10.7911	0.646092	0.00193035	yes
LOC100849042	14:31801397-31907634	MANNHE	CTRL	21.2959	33.345	0.646894	0.000721596	yes
IFIT5	26:11117505-11127465	MANNHE	CTRL	10.6498	16.6783	0.647147	0.000721596	yes
TLE1	8:57963951-58010785	MANNHE	CTRL	6.8405	10.7432	0.651255	0.00534264	yes
KATNAL1	12:30519851-30558210	MANNHE	CTRL	2.85054	4.47999	0.652259	0.0349853	yes
ARRDC2	7:5101423-5105930	MANNHE	CTRL	30.7634	48.3599	0.652596	0.000721596	yes
KRTCAP3	11:72223038-72224689	MANNHE	CTRL	12.0523	18.9509	0.652963	0.00950032	yes
TTLL1	5:114494261-114530242	MANNHE	CTRL	15.0573	23.7304	0.656275	0.000721596	yes
SNAPC1	10:74148206-74178130	MANNHE	CTRL	4.53603	7.14895	0.656302	0.00400408	yes
TDRD7	8:63071038-63173719	MANNHE	CTRL	7.0826	11.1655	0.656697	0.000721596	yes
IFI27L2	21:59346451-59348581	MANNHE	CTRL	56.1665	88.5643	0.657014	0.000721596	yes
KIRREL3	29:30405837-30886857	MANNHE	CTRL	2.13923	3.37531	0.657933	0.0292104	yes
IFIH1	2:34216857-34272535	MANNHE	CTRL	12.3455	19.4806	0.658054	0.000721596	yes
TRIM21	15:51474120-51483659	MANNHE	CTRL	21.0835	33.2881	0.65889	0.000721596	yes
SCML4	9:42836239-42857244	MANNHE	CTRL	11.8197	18.6722	0.659705	0.00534264	yes
ICOS	2:92564260-92589913	MANNHE	CTRL	32.6583	51.6247	0.660612	0.000721596	yes
IL2RA	13:17540960-17586319	MANNHE	CTRL	19.6457	31.0738	0.661483	0.000721596	yes
LOC512980	10:23130632-23140233	MANNHE	CTRL	5.14371	8.16654	0.666916	0.0292104	yes
LOC782264	12:33620249-34054911	MANNHE	CTRL	7.90466	12.5598	0.668038	0.0145064	yes
IRF7	29:50903718-50906821	MANNHE	CTRL	46.0014	73.1382	0.668949	0.000721596	yes
LOC100847324	18:61347339-61347959	MANNHE	CTRL	17.438	27.7376	0.669611	0.0271219	yes
SLX4	25:2958210-2975115	MANNHE	CTRL	14.7595	23.4941	0.670653	0.000721596	yes
JSP.1	23:28469732-28473374	MANNHE	CTRL	919.96	1464.63	0.670891	0.0328844	yes
BCL2A1	21:26481213-26490869	MANNHE	CTRL	72.0444	114.736	0.671363	0.000721596	yes
LOC788205	19:26675244-26676864	MANNHE	CTRL	3.28323	5.22992	0.671673	0.0314941	yes
QPCT	11:19815844-19846493	MANNHE	CTRL	2.8334	4.51656	0.672691	0.0175317	yes
ETV1	4:22042158-22145007	MANNHE	CTRL	2.05132	3.27183	0.673542	0.0219925	yes
MTM1	X:33460692-33552556	MANNHE	CTRL	4.46488	7.12691	0.674654	0.00298038	yes
VSTM2L	13:67460323-67498859	MANNHE	CTRL	12.2105	19.4999	0.67535	0.000721596	yes
HES4	16:52724739-52727540	MANNHE	CTRL	7.50979	12.0112	0.677539	0.000721596	yes
AMDHD1	5:60598347-60613064	MANNHE	CTRL	2.9045	4.65817	0.681473	0.017848	yes
BBC3	18:54675516-54688634	MANNHE	CTRL	3.99463	6.40712	0.681614	0.0252751	yes
NT5C2	26:23983206-24056837	MANNHE	CTRL	22.3206	35.8057	0.681813	0.000721596	yes
KIAA1383	28:5711872-5714662	MANNHE	CTRL	2.75831	4.43169	0.684074	0.00660079	yes
WARS	21:66888846-66911304	MANNHE	CTRL	127.588	205.11	0.684899	0.000721596	yes
GGT1	17:73437662-73453652	MANNHE	CTRL	2.10755	3.39277	0.686898	0.0213665	yes
C18H16orf87	18:15186646-15219204	MANNHE	CTRL	8.4705	13.6413	0.687456	0.00703581	yes
DHX58	19:42877796-42887950	MANNHE	CTRL	19.4718	31.3631	0.687682	0.000721596	yes
SMAGP	5:28683697-28709509	MANNHE	CTRL	14.0857	22.7076	0.688943	0.000721596	yes
BOLA-DRB2	23:25545035-25586120	MANNHE	CTRL	20.9415	33.7989	0.69061	0.000721596	yes
C28H10orf116	28:41912321-41914566	MANNHE	CTRL	21.7067	35.0501	0.69128	0.0317565	yes
KMO	16:35974455-36045385	MANNHE	CTRL	2.01067	3.24783	0.691799	0.0114973	yes
FTSJ2	25:41521790-41533975	MANNHE	CTRL	23.4879	37.9573	0.69246	0.000721596	yes
LOC100848419	18:50881963-50889692	MANNHE	CTRL	27.7113	44.8613	0.694997	0.000721596	yes
ATP2B2	22:54995630-55122063	MANNHE	CTRL	0.84971	1.37615	0.69559	0.00660079	yes
PAPLN	10:85091797-85123962	MANNHE	CTRL	2.36115	3.82504	0.695989	0.00577637	yes
PARP12	4:104310324-104356479	MANNHE	CTRL	36.4627	59.091	0.696517	0.000721596	yes
TUFT1	3:19238264-19289302	MANNHE	CTRL	1.01305	1.64184	0.69661	0.0493682	yes
PITPNM2	17:54716440-54801733	MANNHE	CTRL	12.1506	19.7204	0.698662	0.000721596	yes
USP6NL	13:12778210-12833138	MANNHE	CTRL	8.82964	14.3397	0.699585	0.000721596	yes
CACNB3	5:31116983-31126056	MANNHE	CTRL	8.7332	14.1834	0.699617	0.000721596	yes
LOC100848290	19:26910152-26923128	MANNHE	CTRL	14.2549	23.1542	0.699815	0.00447872	yes
ZNF502	22:16514155-16523812	MANNHE	CTRL	0.957931	1.55806	0.70176	0.0373081	yes
PAQR6	3:14598346-14602877	MANNHE	CTRL	3.63232	5.91375	0.703181	0.0148047	yes
LOC788405	18:60934078-60934613	MANNHE	CTRL	15.7014	25.5747	0.703824	0.017848	yes
RND2	19:43696265-43700032	MANNHE	CTRL	7.1309	11.6397	0.706899	0.00193035	yes
GCLC	23:6922379-6965163	MANNHE	CTRL	10.3709	16.9517	0.708894	0.000721596	yes
CBR3	1:150144148-150153935	MANNHE	CTRL	7.9776	13.044	0.709362	0.00447872	yes
PTER	13:31202454-31278293	MANNHE	CTRL	7.04979	11.5519	0.712479	0.000721596	yes
RN5-8S1	25:32467531-32467688	MANNHE	CTRL	21114.7	34658.2	0.71495	0.000721596	yes
LOC514842	6:60073691-60152485	MANNHE	CTRL	26.9792	44.3188	0.716071	0.000721596	yes
SLC30A3	11:72349472-72373191	MANNHE	CTRL	1.4346	2.35806	0.716946	0.0487998	yes
CD7	19:51152179-51155593	MANNHE	CTRL	27.0391	44.4917	0.71849	0.000721596	yes
CD86	1:67144166-67210856	MANNHE	CTRL	22.6243	37.3267	0.722333	0.000721596	yes
CASP9	16:53250583-53288439	MANNHE	CTRL	9.53904	15.7626	0.724589	0.000721596	yes
GPR160	1:98071039-98141272	MANNHE	CTRL	6.37553	10.5386	0.72507	0.000721596	yes
MT3	18:24134103-24135544	MANNHE	CTRL	17.3733	28.7187	0.725121	0.0264322	yes
PEX11A	21:21523622-21530708	MANNHE	CTRL	1.90706	3.15277	0.725264	0.00826171	yes
TMEM86B	18:62677952-62679860	MANNHE	CTRL	12.2776	20.3038	0.725716	0.00298038	yes
LOC789101	4:106441018-106446408	MANNHE	CTRL	5.10901	8.4524	0.726317	0.0261127	yes
HOPX	6:73639365-73648429	MANNHE	CTRL	18.8786	31.2728	0.728152	0.000721596	yes
CLDN15	25:36040491-36045873	MANNHE	CTRL	2.62597	4.35039	0.728296	0.0339772	yes
MBD4	22:56949104-56958162	MANNHE	CTRL	25.6999	42.5879	0.72868	0.000721596	yes
STAG3	25:36741125-36768836	MANNHE	CTRL	13.5704	22.4989	0.729393	0.000721596	yes
LOC751788	5:102537289-102598584	MANNHE	CTRL	2.5187	4.17638	0.729576	0.000721596	yes
ARMC12	23:9683949-9694015	MANNHE	CTRL	12.7488	21.1412	0.729695	0.000721596	yes
LOC540363	17:52565555-52785516	MANNHE	CTRL	0.734926	1.22123	0.732664	0.0475014	yes
CD226	24:7576789-7667905	MANNHE	CTRL	5.69157	9.47412	0.735167	0.00351112	yes
LOC616942	23:27842252-27846497	MANNHE	CTRL	44.2259	73.8155	0.739032	0.000721596	yes
CTSW	29:44661697-44665098	MANNHE	CTRL	40.8648	68.2529	0.740031	0.000721596	yes
LOC786510	X:58553615-58555255	MANNHE	CTRL	7.3837	12.3344	0.740272	0.000721596	yes
ULBP11	19:19935945-19947828	MANNHE	CTRL	2.68417	4.48605	0.740967	0.0261127	yes
TNF	23:27533900-27541815	MANNHE	CTRL	8.20118	13.7096	0.741284	0.0258838	yes
GRB7	19:40753902-40769918	MANNHE	CTRL	1.51633	2.53676	0.7424	0.0398602	yes
NAT14	18:62472029-62474435	MANNHE	CTRL	2.42851	4.06486	0.743134	0.017848	yes
C18H16orf74	18:11730925-11759348	MANNHE	CTRL	31.2757	52.3702	0.743707	0.000721596	yes
NECAB3	13:63684234-63703230	MANNHE	CTRL	4.41119	7.39016	0.744437	0.00135308	yes
DCK	6:88049497-88077488	MANNHE	CTRL	18.4355	30.9128	0.745715	0.000721596	yes
CASZ1	16:43786504-43832154	MANNHE	CTRL	1.34932	2.26416	0.746743	0.00703581	yes
SSBP2	7:83706300-84016324	MANNHE	CTRL	17.2905	29.0633	0.749219	0.000721596	yes
CRCP	25:28247948-28294983	MANNHE	CTRL	11.929	20.0517	0.749253	0.0279965	yes
LOC100297263	4:106449624-106450231	MANNHE	CTRL	12.3791	20.8242	0.750353	0.0157571	yes
SELE	16:38179780-38192433	MANNHE	CTRL	5.06326	8.52468	0.751579	0.000721596	yes
PAPSS2	26:9292115-9402158	MANNHE	CTRL	3.77942	6.36364	0.751687	0.00298038	yes
PGLYRP2	7:8701375-8707384	MANNHE	CTRL	1.13178	1.90715	0.75283	0.0382118	yes
LOC508070	15:46851579-46859123	MANNHE	CTRL	34.6333	58.5449	0.757384	0.000721596	yes
ZNFX1	13:78074488-78098372	MANNHE	CTRL	17.7984	30.1926	0.76245	0.000721596	yes
SORL1	15:32584733-32755339	MANNHE	CTRL	18.3655	31.1579	0.762603	0.000721596	yes
LOC526769	16:52658993-52671523	MANNHE	CTRL	1.30809	2.22051	0.76343	0.0191947	yes
[truncated: 353 more rows]

## Sheet: KEGG_pathways
Category	Term	Count	%	PValue	Genes	List Total	Pop Hits	Pop Total	Fold Enrichment	Bonferroni	Benjamini	FDR
KEGG_PATHWAY	bta04512:ECM-receptor interaction	33	0.148301	6.13346e-11	COL3A1, ITGA11, ITGB3, SDC4, ITGB1, LAMB3, GP5, LAMB2, COL6A6, COL6A3, COL6A2, COL6A1, THBS1, COL11A2, THBS3, SPP1, FN1, COL4A2, COL4A1, TNXB, HSPG2, ITGA1, COL5A3, ITGA9, VWF, LAMA4, SDC1, ITGA6, LAMA5, ITGA5, ITGA7, COL1A2, COL1A1	624	75	4940	3.48333	1.12242e-08	1.12242e-08	7.57573e-08
KEGG_PATHWAY	bta04514:Cell adhesion molecules (CAMs)	42	0.188747	6.14555e-09	PVR, ITGAL, MPZL1, LOC786695, CLDN4, CD8A, CLDN3, CLDN5, NEO1, CLDN11, SDC4, ITGB1, CDH5, CLDN15, ICOS, CD2, ESAM, CNTNAP1, CD4, LOC509513, CD6, SELPLG, SELP, F11R, PTPRM, ICAM3, CD276, PDCD1LG2, BOLA-DQA1, ITGA9, SIGLEC1, SDC1, CD86, ITGA6, CD34, PECAM1, VCAN, JSP.1, SELE, JAM3, CD226, BOLA-DYB	624	129	4940	2.57752	1.12464e-06	5.62318e-07	7.59066e-06
KEGG_PATHWAY	bta04060:Cytokine-cytokine receptor interaction	49	0.220205	4.78431e-07	ACVRL1, OSMR, LOC525415, FASLG, CXCR2, CXCR3, CXCL10, TNFRSF11B, CXCR6, IFNG, IL1RAP, CCR10, IL1B, FAS, IL13RA1, LTA, IL18RAP, IL6R, IFNAR1, CCR7, LOC616364, CCR5, CCR4, PDGFRA, PDGFRB, IL1R2, CCL3, TNF, CXCL9, TNFRSF8, PF4, CCL5, IL7R, CCL4, TNFRSF4, IL12RB2, IL4, IL18R1, IL2RB, IL2RA, IL23R, IL8, FLT3, FLT4, TNFRSF13B, LOC529196, KDR, CXCL14, CXCL13, EPOR	624	186	4940	2.08557	8.75491e-05	2.91839e-05	0.000590931
KEGG_PATHWAY	bta04510:Focal adhesion	48	0.215711	6.19386e-07	CAV1, COL3A1, ITGA11, ITGB3, ITGB1, VCL, LAMB3, PTK2, LAMB2, ARHGAP5, COL6A6, COL6A3, COL6A2, COL6A1, SHC1, PIK3R5, THBS1, COL11A2, SHC2, THBS3, SPP1, FN1, COL4A2, COL4A1, TNXB, ROCK2, FLT4, ITGA1, FLNC, COL5A3, KDR, VEGFB, ITGA9, VWF, LAMA4, ITGA6, CCND3, CCND2, LAMA5, ITGA5, VEGFA, ITGA7, COL1A2, PDGFRA, PDGFRB, COL1A1, PARVB, MYLK	624	182	4940	2.08791	0.000113341	2.83365e-05	0.000765031
KEGG_PATHWAY	bta04640:Hematopoietic cell lineage	27	0.121337	1.41995e-06	IL1R2, TNF, CD8A, ANPEP, ITGB3, IL7R, GP5, MS4A1, CD2, IL1B, CD4, CD7, IL4, CD3G, IL2RA, CD3D, CD3E, FLT3, ITGA1, IL6R, CD1E, CD37, ITGA6, TFRC, ITGA5, CD34, EPOR	624	78	4940	2.74038	0.000259817	5.19688e-05	0.00175383
KEGG_PATHWAY	bta04940:Type I diabetes mellitus	16	0.0719036	3.72608e-05	PRF1, TNF, LOC786695, LOC786126, FASLG, LOC508858, BOLA-DQA1, CD86, CPE, IFNG, IL1B, JSP.1, HSPD1, FAS, LOC509513, LTA, BOLA-DYB	624	39	4940	3.24786	0.00679567	0.00113583	0.0460129
KEGG_PATHWAY	bta05332:Graft-versus-host disease	13	0.0584217	0.000144916	PRF1, TNF, LOC786695, LOC786126, FASLG, LOC508858, BOLA-DQA1, CD86, IFNG, IL1B, JSP.1, FAS, LOC509513, BOLA-DYB	624	30	4940	3.43056	0.0261729	0.00378162	0.178845
KEGG_PATHWAY	bta04062:Chemokine signaling pathway	39	0.175265	0.00026077	PRKCZ, CCL3, ADCY6, CXCL9, LOC525415, NFKBIA, PF4, CXCR2, CXCR3, CCL5, CCL4, CXCL10, CCL24, CCL22, STAT4, PTK2, CCL20, CCL21, CXCR6, CCR10, SHC1, PIK3R5, PLCB1, SHC2, GNG5, ITK, IL8, ROCK2, LOC529196, STAT1, CCL16, CCL17, STAT2, CCR7, CCL14, CCR5, CXCL14, LOC616364, CCR4, CXCL13, IKBKB	624	171	4940	1.80556	0.0466061	0.00594813	0.321613
KEGG_PATHWAY	bta05330:Allograft rejection	13	0.0584217	0.000569098	IL4, PRF1, TNF, LOC786695, LOC786126, FASLG, LOC508858, BOLA-DQA1, CD86, IFNG, JSP.1, FAS, LOC509513, BOLA-DYB	624	34	4940	3.02696	0.098932	0.0115082	0.700654
KEGG_PATHWAY	bta00510:N-Glycan biosynthesis	13	0.0584217	0.00356187	ALG3, ALG5, DPAGT1, MAN1A1, STT3B, MGAT3, STT3A, DAD1, RPN1, DPM3, RPN2, DDOST, ALG14	624	41	4940	2.51016	0.47951	0.0632122	4.31157
KEGG_PATHWAY	bta04610:Complement and coagulation cascades	18	0.0808916	0.0059361	PLAT, C7, A2M, MASP1, C3, CFB, F13A1, BDKRB1, C1R, LOC781004, PROC, VWF, THBD, SERPINA5, F2, CFH, TFPI, PROS1, F2R	624	71	4940	2.00704	0.66363	0.094302	7.08992
KEGG_PATHWAY	bta04612:Antigen processing and presentation	17	0.0763976	0.00769578	CD8A, LOC786695, PDIA3, LGMN, KIR2DS1, HSPA1A, CALR, CANX, BOLA-DQA1, LOC781339, JSP.1, CD4, CTSB, LOC509513, LTA, BOLA-DYB, KIR3DL2	624	67	4940	2.00871	0.756777	0.111139	9.10107
KEGG_PATHWAY	bta00330:Arginine and proline metabolism	14	0.0629157	0.0105388	ALDH18A1, GATM, ASS1, SRM, MAOA, ASL, LAP3, ABP1, PYCR1, P4HA2, NOS3, NOS2, OAT, ADC	624	52	4940	2.13141	0.85613	0.138553	12.266
KEGG_PATHWAY	bta04670:Leukocyte transendothelial migration	24	0.107855	0.0112299	F11R, ITGAL, ITK, NCF2, CLDN4, ROCK2, CLDN3, MMP9, CLDN5, CTNND1, CLDN11, ITGB1, MMP2, CDH5, VCL, CLDN15, PTK2, ARHGAP5, MAPK13, PECAM1, RAPGEF4, PIK3R5, ESAM, JAM3	624	112	4940	1.69643	0.873396	0.137242	13.0199
KEGG_PATHWAY	bta04620:Toll-like receptor signaling pathway	21	0.0943735	0.011872	IRAK1, TNF, IL8, CXCL9, NFKBIA, TLR3, CCL5, TAB1, STAT1, TLR6, IFNAR1, CXCL10, CD86, STAT4, MAPK13, IRF7, MAP3K8, IL1B, PIK3R5, LBP, IKBKB, SPP1	624	94	4940	1.76862	0.887588	0.135588	13.715
KEGG_PATHWAY	bta00520:Amino sugar and nucleotide sugar metabolism	12	0.0539277	0.0126599	PGM3, UAP1, NANS, GNE, GFPT1, GNPNAT1, GFPT2, HK2, NPL, GALE, FUK, FPGT	624	42	4940	2.2619	0.902855	0.135602	14.5609
KEGG_PATHWAY	bta05340:Primary immunodeficiency	10	0.0449398	0.0145641	CD3D, CD8A, CD3E, ICOS, LCK, TNFRSF13B, CD4, AICDA, IL7R, ADA	624	32	4940	2.47396	0.931768	0.146092	16.5741
KEGG_PATHWAY	bta05222:Small cell lung cancer	18	0.0808916	0.0197046	COL4A2, COL4A1, CYCS, NFKBIA, ITGB1, CCNE1, LAMB3, LAMA4, PTK2, LAMB2, ITGA6, CASP9, LAMA5, PIK3R5, NOS2, IKBKB, TRAF5, FN1	624	80	4940	1.78125	0.973799	0.183175	21.793
KEGG_PATHWAY	bta04660:T cell receptor signaling pathway	22	0.0988675	0.0199576	PDK1, IL4, ITK, TNF, CD3G, CD3D, CD8A, CD3E, NFKBIA, LAT, MAPK13, ICOS, RASGRP1, MAP3K8, LCK, IFNG, PIK3R5, NFATC4, CD4, LOC509513, IKBKB, TEC	624	105	4940	1.65873	0.975007	0.17648	22.0419
KEGG_PATHWAY	bta05320:Autoimmune thyroid disease	11	0.0494338	0.0376864	IL4, BOLA-DQA1, PRF1, CD86, LOC786695, LOC786126, FASLG, JSP.1, FAS, LOC509513, LOC508858, BOLA-DYB	624	43	4940	2.02519	0.999115	0.296366	37.7792
KEGG_PATHWAY	bta00630:Glyoxylate and dicarboxylate metabolism	5	0.0224699	0.0399246	ACO2, ACO1, MTHFD1L, MDH2, MDH1	624	11	4940	3.59848	0.999422	0.298861	39.5432
KEGG_PATHWAY	bta00230:Purine metabolism	27	0.121337	0.0508611	XDH, GDA, ADCY6, DCK, PDE3B, RRM2B, ADA, POLE2, PDE1B, PDE1C, POLE3, NT5C2, ENTPD4, ENTPD1, PAPSS1, PAPSS2, ENTPD2, IMPDH1, AK1, POLR1A, NPR1, AK2, PDE3A, AMPD3, POLD4, PDE7B, GUCY1B3	624	149	4940	1.43456	0.999929	0.352224	47.5205
KEGG_PATHWAY	bta04650:Natural killer cell mediated cytotoxicity	20	0.0898796	0.0641037	PRF1, ITGAL, CD244, TNF, KLRK1, LOC786126, FASLG, KIR2DS1, NCR1, LOC508858, IFNAR1, LAT, SH2D1A, CASP3, LCK, IFNG, PIK3R5, NFATC4, SHC1, FAS, SHC2	624	105	4940	1.50794	0.999995	0.4097	55.8816
KEGG_PATHWAY	bta04350:TGF-beta signaling pathway	16	0.0719036	0.0661743	ACVRL1, TNF, RBL2, ROCK2, FST, RPS6KB1, SMAD1, DCN, ACVR1B, ID2, IFNG, ID3, BMPR1B, THBS1, THBS3, BMP6	624	79	4940	1.60338	0.999996	0.406697	57.0722
KEGG_PATHWAY	bta03060:Protein export	4	0.0179759	0.0687007	SRP14, SRPR, SRP68, SRP72	624	8	4940	3.95833	0.999998	0.406072	58.4848
KEGG_PATHWAY	bta05310:Asthma	7	0.0314578	0.072317	FCER1A, IL4, BOLA-DQA1, TNF, LOC786695, LOC509513, BOLA-DYB	624	24	4940	2.30903	0.999999	0.410419	60.4327
KEGG_PATHWAY	bta05416:Viral myocarditis	13	0.0584217	0.075587	PRF1, ITGAL, CAV1, LOC786695, CYCS, BOLA-DQA1, CASP3, CD86, CASP9, JSP.1, LOC509513, MYH10, BOLA-DYB	624	61	4940	1.68716	0.999999	0.412987	62.1213
KEGG_PATHWAY	bta04623:Cytosolic DNA-sensing pathway	11	0.0494338	0.0814827	DDX58, IRF7, IL1B, NFKBIA, IL33, CCL5, IKBKB, CCL4, ADAR, CXCL10, ZBP1	624	49	4940	1.77721	1	0.426215	64.9995

## Sheet: functional_clusters
Annotation Cluster 1	Enrichment Score: 18.847813061284988
Category	Term	Count	%	PValue	Genes	List Total	Pop Hits	Pop Total	Fold Enrichment	Bonferroni	Benjamini	FDR
UP_SEQ_FEATURE	signal peptide	236	11.8533	3.83617e-27	BTD, EDN1, FST, FSTL1, SSR1, LPHN2, DNAJB11, PLOD1, APOE, CTGF, IFNG, CFH, FAS, PI16, APOO, F11R, CD3G, CD3D, GPR133, CD3E, OLFML2B, SIRPA, TMEM150B, VEGFB, RETN, CCR7, SERPINF1, VEGFA, F2, BOLA-DYA, ADAMTS2, ADAMTS4, BOLA-DYB, SCN1B, CRELD2, ELN, CALR, NRN1, SERPINH1, MANF, CALU, PROCR, FGL2, FGL1, SPP1, PLAT, CFB, IL1RN, GGH, CHI3L1, IFI27L2, CLGN, SFRP1, HSPA13, PDIA3, ARSK, PDIA5, PDIA4, EDNR…	737	960	5635	1.87961	7.00102e-24	7.00102e-24	6.52508e-24
GOTERM_CC_FAT	GO:0044421~extracellular region part	132	6.62983	3.45687e-26	A2M, BTD, IL16, MMP9, EDN1, POSTN, MMP3, MMP2, CXCL10, APOA1, APOE, CTGF, SOSTDC1, IFNG, IL1B, LOX, SPON1, APOO, COCH, WNT10A, OLFML2B, CST3, MFGE8, SERPINF1, VEGFA, F2, TFPI, COL1A2, ADAMTS1, COL1A1, MFAP4, MFAP5, ADAMTS2, ADAMTS5, ADAMTS4, RBP4, TWSG1, CCL3, ACHE, ELN, CCL5, CALR, TIMP2, CCL4, TIMP1, LAMB3, LAMB2, FGL2, FGL1, LAMB1, ENTPD1, FN1, SPP1, ANGPTL4, PLAT, CPA5, COL18A1, IL1RN, GGH, C…	850	427	6966	2.53344	1.29633e-23	1.29633e-23	4.77636e-23
GOTERM_CC_FAT	GO:0005576~extracellular region	212	10.6479	3.39325e-25	A2M, BTD, EDN1, FST, LOC531557, FSTL1, POSTN, NOV, ISG15, APOE, CTGF, SOSTDC1, IFNG, CFH, FAS, PI16, APOO, WNT10A, OLFML2B, APOLD1, VEGFB, RETN, SERPINF1, LOC515697, VEGFA, F2, TFPI, WFDC1, ADAMTS1, ADAMTS2, ADAMTS5, ADAMTS4, RBP4, CRELD2, ELN, CALR, MANF, CALU, IL17D, LAMB3, LAMB2, FGL2, FGL1, LAMB1, SPP1, COL18A1, PLAT, CFB, IL1RN, CCDC80, CHI3L1, GGH, ECM1, LAMA4, SFRP1, LAMA5, LOC510193, PDIA…	850	892	6966	1.94776	1.27247e-22	6.36234e-23	4.68845e-22
SP_PIR_KEYWORDS	signal	236	11.8533	4.83359e-23	BTD, EDN1, FST, FSTL1, SSR1, LPHN2, DNAJB11, PLOD1, APOE, CTGF, IFNG, CFH, FAS, PI16, APOO, F11R, CD3G, CD3D, GPR133, CD3E, OLFML2B, SIRPA, TMEM150B, VEGFB, RETN, CCR7, SERPINF1, VEGFA, F2, BOLA-DYA, ADAMTS2, ADAMTS4, BOLA-DYB, SCN1B, CRELD2, ELN, CALR, NRN1, SERPINH1, MANF, CALU, PROCR, FGL2, FGL1, SPP1, PLAT, CFB, IL1RN, GGH, CHI3L1, IFI27L2, CLGN, SFRP1, HSPA13, PDIA3, ARSK, PDIA5, PDIA4, EDNR…	1001	960	7349	1.80482	2.43129e-20	2.43129e-20	6.96642e-20
UP_SEQ_FEATURE	disulfide bond	180	9.04068	7.41264e-18	A2M, MPZL1, ADORA3, MMP9, FST, F2RL1, EDN1, PGLYRP1, TLR3, FSTL1, MMP2, CXCL10, LPHN2, OLFML3, CTGF, CFH, DEFB10, FAS, RAB27B, TFPI2, SPON1, COCH, F11R, CD3G, CD3D, CD3E, OLFML2B, CST3, TAP, MFGE8, COLEC12, TCN2, SIRPA, TRAT1, SAG, VEGFB, CBLN3, RETN, CCR7, LYNX1, THBD, CCR5, DARC, VEGFA, F2, CALR3, LOC788250, ADAMTS2, ADAMTS5, ADAMTS4, XDH, GGCX, ITGAL, RBP4, PAM, CCL3, ACHE, SCN1B, CRELD2, ELN,…	737	764	5635	1.80138	1.35281e-14	6.76403e-15	1.26084e-14
SP_PIR_KEYWORDS	glycoprotein	236	11.8533	9.29548e-18	A2M, ADORA3, BTD, FST, FSTL1, AQP1, AQP3, SSR1, LPHN2, DNAJB11, PLOD1, IFNG, CFH, ERAP2, FAS, PI16, TPSB1, APOO, F11R, CD3G, CD3D, GPR133, CD3E, OLFML2B, DPAGT1, COLEC12, SIRPA, TMEM150B, SAG, VEGFB, CD37, CCR7, CCR5, SERPINF1, VEGFA, F2, PMP22, ADAMTS2, ADAMTS5, ADAMTS4, TPST2, SCN1B, CRELD2, CALR, NRN1, SERPINH1, CALU, ADRB3, HCRTR1, PROCR, UPK1A, FGL2, TRAM1, SPP1, PLAT, LOC511937, CFB, IL1RN,…	1001	1048	7349	1.65327	4.67563e-15	2.33781e-15	1.33971e-14
UP_SEQ_FEATURE	glycosylation site:N-linked (GlcNAc...)	209	10.4972	2.18224e-16	A2M, ADORA3, BTD, FST, FSTL1, AQP1, AQP3, SSR1, LPHN2, DNAJB11, PLOD1, IFNG, CFH, ERAP2, FAS, PI16, F11R, CD3G, CD3D, GPR133, CD3E, OLFML2B, DPAGT1, COLEC12, SIRPA, TMEM150B, CD37, CCR7, SERPINF1, VEGFA, F2, ADAMTS2, ADAMTS5, ADAMTS4, TPST2, SCN1B, CRELD2, CALR, SERPINH1, CALU, ADRB3, HCRTR1, PROCR, UPK1A, FGL2, TRAM1, SPP1, PLAT, CFB, IL1RN, CHI3L1, GGH, TMEM39A, SFRP1, ARSK, ANPEP, EDNRA, ST6GA…	737	961	5635	1.66284	4.05231e-13	1.35114e-13	3.77476e-13
SP_PIR_KEYWORDS	disulfide bond	189	9.49272	7.13158e-16	A2M, MPZL1, ADORA3, MMP9, FST, F2RL1, EDN1, PGLYRP1, TLR3, FSTL1, MMP2, CXCL10, LPHN2, OLFML3, DNAJB11, CTGF, CFH, DEFB10, FAS, RAB27B, TFPI2, SPON1, COCH, F11R, CD3G, CD3D, CD3E, OLFML2B, CST3, TAP, MFGE8, COLEC12, TCN2, SIRPA, TRAT1, SAG, VEGFB, CBLN3, RETN, CCR7, LYNX1, THBD, CCR5, DARC, VEGFA, F2, CALR3, LOC788250, MFAP5, ADAMTS2, ADAMTS5, ADAMTS4, XDH, GGCX, ITGAL, RBP4, PAM, CCL3, ACHE, SCN…	1001	802	7349	1.73014	3.35065e-13	1.11688e-13	9.54792e-13
SP_PIR_KEYWORDS	Secreted	143	7.18232	2.09706e-13	A2M, S100A8, IL16, BTD, TUFT1, F13A1, MMP9, EDN1, S100A9, FST, PGLYRP1, FSTL1, MMP2, CXCL10, OLFML3, APOA1, ISG15, APOE, CTGF, IFNG, CFH, IL1B, DEFB10, LOX, TFPI2, SPON1, APOO, COCH, OLFML2B, CST3, TAP, MFGE8, TCN2, CBLN3, VEGFB, RETN, CHID1, SERPINF1, CPE, VEGFA, F2, COL1A2, COL1A1, MFAP4, MFAP5, ADAMTS2, ADAMTS5, ADAMTS4, XDH, RBP4, CCL3, ACHE, CRELD2, ELN, PAMR1, CCL5, TIMP2, CCL4, MANF, CALU,…	1001	583	7349	1.80078	1.0549e-10	2.63725e-11	3.02258e-10
GOTERM_CC_FAT	GO:0005615~extracellular space	76	3.81718	6.79924e-13	A2M, PDIA3, BTD, IL16, MMP9, EDN1, FASLG, HP, MMP2, CXCL10, APOA1, RSPO1, APOE, SOSTDC1, IFNG, GPX3, SEMA3C, IL1B, ANGPT1, LOX, LBP, LTA, APOO, COCH, SAA3, CST3, MFGE8, ADM, SERPINF1, VEGFA, CPXM1, F2, TFPI, COL1A2, RBP4, TWSG1, CCL3, ACHE, TNF, C3, CXCL9, PF4, CALR, CCL5, OSTN, CCL4, CCL24, CCL22, CCL20, CCL21, C1QTNF1, FCN2, FGL2, FGL1, THBS1, MYOC, SCG2, ANGPTL4, SPP1, IL4, PLAT, CPA5, TNXB, I…	850	267	6966	2.33274	2.54963e-10	4.24938e-11	9.39415e-10
Annotation Cluster 2	Enrichment Score: 12.71736816986778
Category	Term	Count	%	PValue	Genes	List Total	Pop Hits	Pop Total	Fold Enrichment	Bonferroni	Benjamini	FDR
GOTERM_CC_FAT	GO:0005783~endoplasmic reticulum	117	5.87644	2.58048e-17	HM13, TLR3, EIF5A, SSR1, BAK1, DNAJB11, PLOD1, PLOD2, LRRC59, RPN1, ERAP2, ELOVL6, RPN2, ASPH, SAR1B, DNAJC3, DDOST, SAR1A, B3GALTL, GOLT1B, ERP27, ERP29, DPAGT1, CERCAM, BCAP31, TMEM106C, SEC61B, TXNDC5, SURF4, HSD11B2, CALR3, EIF2AK3, UGGT1, SEC61G, GGCX, TPST2, CAV1, CRELD2, DERL1, HAX1, CYP51A1, CALR, DERL3, SERPINH1, CALU, MOV10, KDELC1, UPK1A, ERO1L, TRAM1, SEC61A1, P4HB, HERPUD1, GABARAPL1…	850	441	6966	2.17426	9.67678e-15	3.22559e-15	3.56544e-14
SP_PIR_KEYWORDS	endoplasmic reticulum	82	4.11853	1.73259e-12	PDIA3, CLSTN3, TLR3, EIF5A, PDIA5, PDIA4, CANX, SSR1, FAR2, PIGK, DNAJB11, PLOD1, SRPR, LRRC59, VKORC1, ERAP2, RPN2, ASPH, SAR1B, DNAJC3, DDOST, KDELR1, SAR1A, KDELR2, ERP27, ERP29, DPAGT1, MESDC2, CERCAM, TMEM106C, DGAT2, SURF4, HSD11B2, SIL1, CALR3, FKBP10, SEC61G, SEC23B, TMCO1, FKBP2, SERP1, GGCX, FKBP9, DERL1, CRELD2, HAX1, CYP51A1, RSAD2, CALR, DERL3, SERPINH1, CALU, SLC35B1, STT3A, ALOX5AP…	1001	274	7349	2.19714	8.71505e-10	1.74301e-10	2.49714e-09
GOTERM_CC_FAT	GO:0044432~endoplasmic reticulum part	45	2.26017	1.57579e-10	DERL1, HM13, PDIA3, CLSTN3, CYP51A1, PDIA5, PDIA4, CALR, SERPINH1, CALU, PIGK, STT3A, DNAJB11, SRPR, SEC22B, CD4, ELOVL6, HSPA5, ASPH, RPN2, ERO1L, DDOST, SEC61A1, P4HB, HERPUD1, ERP27, ERP29, DPAGT1, CERCAM, KRTCAP2, SELS, ERP44, HSP90B1, SEC61B, PPIB, SPCS3, SIL1, SPCS1, CALR3, DPM3, FKBP10, RCN3, EIF2AK3, SEC23B, SSR3	850	133	6966	2.77284	5.90922e-08	7.38653e-09	2.17727e-07
Annotation Cluster 3	Enrichment Score: 11.776274352410443
Category	Term	Count	%	PValue	Genes	List Total	Pop Hits	Pop Total	Fold Enrichment	Bonferroni	Benjamini	FDR
GOTERM_BP_FAT	GO:0009611~response to wounding	60	3.01356	2.43854e-15	ADORA3, F13A1, F2RL1, TLR3, GJA1, LOC781004, CXCL10, S1PR3, CASP3, CFH, IL1B, NOS3, LBP, TFPI2, RAB27A, PTGER3, SAA3, PROC, CD163, THBD, CCR4, DARC, F2, TFPI, PROS1, PTAFR, C7, CCL3, TNF, C3, CXCL9, PF4, CCL5, CCL4, DTNBP1, TNFRSF4, IL17D, CCL20, PROCR, FCN2, THBS1, ENTPD1, NEFL, PAPSS2, FN1, SELP, TLR10, IL8, OLR1, CFB, EFEMP2, SMAD1, SELS, LAT, VWF, P2RX7, ITGA5, PECAM1, BMPR1B, F2R, MYH10	1003	175	8785	3.00299	7.54241e-12	3.77121e-12	4.40759e-12
GOTERM_BP_FAT	GO:0006952~defense response	62	3.11401	2.66356e-11	ADORA3, SNCA, PGLYRP1, TLR3, TLR6, LOC781004, CXCL10, S1PR3, SH2D1A, IFNG, CFH, LTF, IL1B, DEFB10, NOS2, LBP, RAB27A, PTGER3, IL18RAP, SAA3, CST3, TAP, IFI47, CD163, CCR5, CCR4, DARC, F2, PTAFR, C7, CCL3, TNF, C3, CXCL9, RSAD2, CCL5, CCL4, TNFRSF4, DEFB5, IL17D, DEFB7, CCL20, FCN2, THBS1, FN1, SELP, IL18R1, LYZ2, TLR10, IL8, OLR1, CFB, STAB2, SMAD1, SELS, BNBD-9-LIKE, S100A12, LAT, P2RX7, CATHL2,…	1003	223	8785	2.43516	8.22507e-08	2.74169e-08	4.81164e-08
GOTERM_BP_FAT	GO:0006954~inflammatory response	38	1.90859	7.2208e-11	C7, CCL3, TNF, ADORA3, C3, CXCL9, TLR3, CCL5, CCL4, TNFRSF4, LOC781004, CXCL10, S1PR3, IL17D, CCL20, FCN2, CFH, IL1B, LBP, THBS1, FN1, SELP, TLR10, PTGER3, IL8, OLR1, CFB, SAA3, SMAD1, SELS, CD163, LAT, P2RX7, CCR4, DARC, F2, BMPR1B, PTAFR, F2R	1003	104	8785	3.2003	2.22978e-07	5.57446e-08	1.30442e-07
Annotation Cluster 4	Enrichment Score: 11.240061703462832
Category	Term	Count	%	PValue	Genes	List Total	Pop Hits	Pop Total	Fold Enrichment	Bonferroni	Benjamini	FDR
GOTERM_CC_FAT	GO:0031012~extracellular matrix	62	3.11401	6.27912e-15	MMP9, POSTN, MMP3, MMP2, TNFRSF11B, CTGF, LOX, COL11A2, VWA1, GPC1, SPON1, WNT10A, OLFML2B, MMP19, MMP14, MMP13, BGN, COL1A2, ADAMTS1, VCAN, COL1A1, MFAP4, MFAP5, ADAMTS2, ADAMTS5, ADAMTS4, FMOD, SPOCK2, LUM, COL3A1, ELN, DCN, TIMP2, TIMP1, LAMB3, COL17A1, LAMB2, CRISPLD2, COL6A2, ADAMTS12, LAMB1, ENTPD1, ANGPTL4, FN1, DPT, COL18A1, COL4A2, COL4A1, TNXB, FBN1, CCDC80, COL15A1, HSPG2, NID1, SPARC,…	850	178	6966	2.85454	2.3731e-12	5.93303e-13	8.74856e-12
GOTERM_CC_FAT	GO:0005578~proteinaceous extracellular matrix	57	2.86288	7.50141e-14	MMP9, POSTN, MMP3, MMP2, TNFRSF11B, CTGF, LOX, COL11A2, VWA1, GPC1, SPON1, WNT10A, MMP19, MMP14, MMP13, BGN, COL1A2, ADAMTS1, VCAN, COL1A1, MFAP4, ADAMTS2, MFAP5, ADAMTS5, ADAMTS4, FMOD, SPOCK2, LUM, COL3A1, ELN, DCN, TIMP2, TIMP1, LAMB3, COL17A1, LAMB2, ADAMTS12, LAMB1, ENTPD1, ANGPTL4, FN1, DPT, COL4A2, COL4A1, TNXB, FBN1, CCDC80, HSPG2, NID1, SPARC, NID2, NTN1, ANXA2, VWF, FBLN1, LAMA4, LAMA5	850	163	6966	2.86584	2.81442e-11	5.62883e-12	1.03695e-10
GOTERM_CC_FAT	GO:0044420~extracellular matrix part	28	1.40633	1.85697e-11	LUM, COL3A1, TIMP2, TIMP1, LAMB3, COL17A1, LOX, VWA1, COL11A2, ENTPD1, LAMB1, FN1, COL4A2, COL4A1, TNXB, CCDC80, HSPG2, NID1, SPARC, NID2, ANXA2, FBLN1, LAMA4, LAMA5, COL1A2, ADAMTS1, COL1A1, MFAP5	850	55	6966	4.17215	6.96364e-09	9.94805e-10	2.56578e-08
SP_PIR_KEYWORDS	extracellular matrix	36	1.80814	1.80422e-10	FMOD, MMP9, LUM, ELN, COL3A1, DCN, TIMP2, MMP2, TIMP1, COL17A1, CTGF, COL11A2, VWA1, SPP1, DPT, FN1, ANGPTL4, SPON1, WNT10A, COL4A2, COL4A1, TNXB, FBN1, SPARC, MMP13, ANXA2, VWF, BGN, COL1A2, VCAN, COL1A1, MFAP4, ADAMTS2, MFAP5, ADAMTS5, ADAMTS4	1001	84	7349	3.14643	9.07524e-08	1.51254e-08	2.60034e-07
GOTERM_CC_FAT	GO:0005604~basement membrane	20	1.00452	3.99534e-09	COL4A2, COL4A1, CCDC80, HSPG2, NID1, SPARC, NID2, TIMP2, ANXA2, TIMP1, LAMB3, COL17A1, LAMA4, FBLN1, LAMA5, ADAMTS1, ENTPD1, LAMB1, VWA1, FN1	850	36	6966	4.55294	1.49825e-06	1.36205e-07	5.52036e-06
Annotation Cluster 5	Enrichment Score: 9.066698685578158
Category	Term	Count	%	PValue	Genes	List Total	Pop Hits	Pop Total	Fold Enrichment	Bonferroni	Benjamini	FDR
UP_SEQ_FEATURE	short sequence motif:Prevents secretion from ER	19	0.954294	5.6776e-11	P4HB, FKBP9, PDIA3, ERP27, ERP29, MESDC2, PDIA5, PDIA4, CALR, CERCAM, SERPINH1, CALU, ERP44, HSP90B1, PPIB, CALR3, HSPA5, FKBP10, RCN3	737	26	5635	5.58736	1.03616e-07	2.59041e-08	9.65723e-08
GOTERM_CC_FAT	GO:0044432~endoplasmic reticulum part	45	2.26017	1.57579e-10	DERL1, HM13, PDIA3, CLSTN3, CYP51A1, PDIA5, PDIA4, CALR, SERPINH1, CALU, PIGK, STT3A, DNAJB11, SRPR, SEC22B, CD4, ELOVL6, HSPA5, ASPH, RPN2, ERO1L, DDOST, SEC61A1, P4HB, HERPUD1, ERP27, ERP29, DPAGT1, CERCAM, KRTCAP2, SELS, ERP44, HSP90B1, SEC61B, PPIB, SPCS3, SIL1, SPCS1, CALR3, DPM3, FKBP10, RCN3, EIF2AK3, SEC23B, SSR3	850	133	6966	2.77284	5.90922e-08	7.38653e-09	2.17727e-07
GOTERM_CC_FAT	GO:0005788~endoplasmic reticulum lumen	20	1.00452	1.09655e-09	P4HB, PDIA3, ERP27, ERP29, PDIA5, PDIA4, CALR, CERCAM, SERPINH1, CALU, ERP44, HSP90B1, PPIB, DNAJB11, SIL1, CD4, CALR3, HSPA5, FKBP10, RCN3	850	34	6966	4.82076	4.11206e-07	4.56895e-08	1.5151e-06
INTERPRO	IPR000886:Endoplasmic reticulum, targeting sequence	14	0.703164	5.51459e-08	FKBP9, P4HB, ERP29, PDIA5, PDIA4, CALR, CERCAM, SERPINH1, ERP44, HSP90B1, CALR3, HSPA5, RCN3, FKBP10	1235	19	9171	5.47172	9.52324e-05	4.76173e-05	9.31882e-05
Annotation Cluster 6	Enrichment Score: 7.560852077232176
Category	Term	Count	%	PValue	Genes	List Total	Pop Hits	Pop Total	Fold Enrichment	Bonferroni	Benjamini	FDR
GOTERM_BP_FAT	GO:0030198~extracellular matrix organization	26	1.30588	5.42678e-10	ELF3, MMP9, ELN, COL3A1, POSTN, SERPINH1, TNFRSF11B, PTK2, CRISPLD2, LOX, COL11A2, VWA1, DPT, TNXB, OLFML2B, CST3, HSPG2, CCDC80, NID1, ANXA2, FBLN1, PDGFRA, COL1A2, COL1A1, APBB1, ADAMTS2	1003	57	8785	3.99521	1.67579e-06	3.35158e-07	9.80331e-07
GOTERM_BP_FAT	GO:0043062~extracellular structure organization	28	1.40633	1.03244e-08	ELF3, MMP9, ELN, COL3A1, POSTN, SERPINH1, TNFRSF11B, PTK2, APP, CRISPLD2, LOX, COL11A2, VWA1, DPT, TNXB, OLFML2B, CST3, HSPG2, CCDC80, NID1, ANXA2, FBLN1, TSC1, PDGFRA, COL1A2, COL1A1, APBB1, ADAMTS2	1003	73	8785	3.35951	3.18814e-05	5.31363e-06	1.86508e-05
GOTERM_BP_FAT	GO:0030199~collagen fibril organization	10	0.50226	3.70711e-06	TNXB, COL3A1, COL1A2, COL1A1, LOX, COL11A2, SERPINH1, ADAMTS2, ANXA2, DPT	1003	14	8785	6.25623	0.0113823	0.000715217	0.00669657
Annotation Cluster 7	Enrichment Score: 6.222974827897213
Category	Term	Count	%	PValue	Genes	List Total	Pop Hits	Pop Total	Fold Enrichment	Bonferroni	Benjamini	FDR
GOTERM_MF_FAT	GO:0030246~carbohydrate binding	46	2.3104	7.01766e-11	MASP1, PGLYRP1, KLRK1, PF4, POSTN, FSTL1, DCN, CALR, LPHN2, GALM, CRISPLD2, CTGF, APOE, GALNTL4, FCN2, UPK1A, PTN, THBS1, PTX3, GPNMB, SELPLG, FN1, SELP, TNXB, OLR1, MRC2, CHI3L1, CCDC80, LGALS8, COLEC12, STAB2, GALNTL1, VEGFB, LYVE1, BGN, CLEC3B, CD34, IGF2R, GFPT1, VEGFA, GFPT2, CALR3, VCAN, ADAMTS1, SELE, CLEC14A	1013	148	9249	2.8378	6.52643e-08	6.52643e-08	1.09851e-07
GOTERM_MF_FAT	GO:0005529~sugar binding	23	1.1552	7.89982e-06	SELP, OLR1, MASP1, MRC2, KLRK1, CHI3L1, LGALS8, COLEC12, GALNTL1, CALR, LPHN2, CLEC3B, GALNTL4, UPK1A, FCN2, GFPT1, IGF2R, GFPT2, VCAN, CALR3, SELE, SELPLG, CLEC14A	1013	74	9249	2.8378	0.00731994	0.000917936	0.0123653
SP_PIR_KEYWORDS	Lectin	20	1.00452	0.000386604	LY75, SELP, OLR1, MASP1, KLRK1, CHI3L1, LGALS8, COLEC12, GALNTL1, CALR, CLEC11A, LPHN2, CLEC3B, GALNTL4, FCN2, CALR3, VCAN, SELPLG, SELE, CLEC14A	1001	62	7349	2.36828	0.176753	0.0148501	0.555751
Annotation Cluster 8	Enrichment Score: 5.787985032246737
Category	Term	Count	%	PValue	Genes	List Total	Pop Hits	Pop Total	Fold Enrichment	Bonferroni	Benjamini	FDR
INTERPRO	IPR013032:EGF-like region, conserved site	39	1.95881	3.88718e-08	C7, CRELD2, PAMR1, C1R, ITGB1, MEGF10, LAMB3, LAMB2, TEK, MRCL, ELTD1, OIT3, TIE1, THBS1, THBS3, FN1, PLAT, SELP, HYAL2, TNXB, EGFL7, EFEMP2, FBN1, EFEMP1, NID1, MFGE8, NID2, STAB2, PROC, LAMA4, FBLN1, THBD, DLL4, WIF1, VCAN, SELE, PROS1, CLEC14A, VLDLR	1235	114	9171	2.54044	6.71294e-05	6.71294e-05	6.56875e-05
SP_PIR_KEYWORDS	egf-like domain	32	1.60723	6.14159e-08	C7, CRELD2, MASP1, PAMR1, C1R, TEK, ELTD1, OIT3, TIE1, THBS1, THBS3, PLAT, SELP, HYAL2, TNXB, EGFL7, EFEMP2, FBN1, EFEMP1, NID1, MFGE8, NID2, STAB2, PROC, FBLN1, THBD, DLL4, VCAN, WIF1, SELE, PROS1, VLDLR	1001	84	7349	2.79682	3.08917e-05	3.86152e-06	8.85158e-05
INTERPRO	IPR006210:EGF-like	32	1.60723	1.25538e-07	CRELD2, PAMR1, CSPG5, MEGF10, TEK, MRCL, OIT3, ELTD1, TIE1, THBS1, THBS3, PLAT, SELP, HYAL2, TNXB, EGFL7, EFEMP2, FBN1, NID1, MFGE8, NID2, STAB2, PROC, FBLN1, THBD, DLL4, VCAN, WIF1, SELE, PROS1, CLEC14A, VLDLR	1235	87	9171	2.73137	0.00021678	7.22652e-05	0.000212139
INTERPRO	IPR000742:EGF-like, type 3	30	1.50678	3.83099e-07	CRELD2, PAMR1, MEGF10, TEK, MRCL, ELTD1, TIE1, THBS1, THBS3, PLAT, SELP, TNXB, EGFL7, EFEMP2, FBN1, EFEMP1, NID1, MFGE8, NID2, STAB2, PROC, FBLN1, THBD, DLL4, VCAN, WIF1, ADAM12, SELE, PROS1, VLDLR	1235	82	9171	2.7168	0.000661394	0.000132314	0.000647379
SMART	SM00181:EGF	32	1.60723	8.3194e-07	CRELD2, PAMR1, CSPG5, MEGF10, TEK, MRCL, OIT3, ELTD1, TIE1, THBS1, THBS3, PLAT, SELP, HYAL2, TNXB, EGFL7, EFEMP2, FBN1, NID1, MFGE8, NID2, STAB2, PROC, FBLN1, THBD, DLL4, VCAN, WIF1, SELE, PROS1, CLEC14A, VLDLR	644	87	4364	2.49247	0.00023957	0.00023957	0.00110479
INTERPRO	IPR018097:EGF-like calcium-binding, conserved site	18	0.904068	9.57013e-07	CRELD2, MASP1, EGFL7, EFEMP2, FBN1, EFEMP1, C1R, NID1, NID2, PROC, FBLN1, THBD, OIT3, VCAN, ELTD1, PROS1, THBS3, VLDLR	1235	36	9171	3.71296	0.0016514	0.000275422	0.0016172
INTERPRO	IPR000152:EGF-type aspartate/asparagine hydroxylation conserved site	19	0.954294	1.11554e-06	CRELD2, MASP1, EGFL7, EFEMP2, FBN1, EFEMP1, C1R, NID1, NID2, PROC, FBLN1, THBD, DLL4, OIT3, VCAN, ELTD1, PROS1, CLEC14A, VLDLR	1235	40	9171	3.52731	0.00192469	0.000275182	0.00188508
INTERPRO	IPR001881:EGF-like calcium-binding	17	0.853842	8.33959e-06	CRELD2, MASP1, EGFL7, EFEMP2, FBN1, EFEMP1, C1R, NID1, NID2, FBLN1, THBD, DLL4, VCAN, ELTD1, PROS1, THBS3, VLDLR	1235	37	9171	3.41191	0.0142993	0.001599	0.0140917
INTERPRO	IPR013091:EGF calcium-binding	14	0.703164	8.43183e-06	CRELD2, EGFL7, EFEMP2, FBN1, EFEMP1, C1R, NID1, NID2, FBLN1, THBD, ELTD1, PROS1, THBS3, VLDLR	1235	26	9171	3.99857	0.0144563	0.00145512	0.0142476
SMART	SM00179:EGF_CA	17	0.853842	2.56208e-05	CRELD2, MASP1, EGFL7, EFEMP2, FBN1, EFEMP1, C1R, NID1, NID2, FBLN1, THBD, DLL4, VCAN, ELTD1, PROS1, THBS3, VLDLR	644	37	4364	3.11348	0.00735172	0.00368264	0.0340185
INTERPRO	IPR006209:EGF	17	0.853842	0.00116953	PLAT, SELP, PAMR1, FBN1, MFGE8, NID1, STAB2, PROC, THBD, DLL4, OIT3, WIF1, VCAN, THBS1, PROS1, SELE, VLDLR	1235	53	9171	2.3819	0.867471	0.106202	1.95806
Annotation Cluster 9	Enrichment Score: 5.586135516378857
Category	Term	Count	%	PValue	Genes	List Total	Pop Hits	Pop Total	Fold Enrichment	Bonferroni	Benjamini	FDR
GOTERM_BP_FAT	GO:0022610~biological adhesion	67	3.36514	1.57632e-07	AEBP1, NRP1, CLDN4, COL21A1, CLDN3, CLSTN3, BCAM, POSTN, DDR2, PCDHGA2, VCL, PCDH1, CTGF, COL12A1, CNTNAP1, CDH26, COL11A2, SPON1, F11R, PDPN, ICAM3, COL22A1, FBLIM1, MFGE8, CD164, CERCAM, CD34, CPXM1, VCAN, MFAP4, ITGAL, TNF, EPDR1, COL3A1, ITGA11, CLDN11, ITGB3, ITGB1, CDH5, IGSF11, TEK, CD4, THBS1, GPNMB, SELPLG, THBS3, SPP1, FN1, DPT, COL18A1, SELP, TNXB, OLR1, COL15A1, ITGA1, PCDH12, NID1, S…	1003	306	8785	1.91776	0.000486649	4.86756e-05	0.000284757
GOTERM_BP_FAT	GO:0007155~cell adhesion	67	3.36514	1.57632e-07	AEBP1, NRP1, CLDN4, COL21A1, CLDN3, CLSTN3, BCAM, POSTN, DDR2, PCDHGA2, VCL, PCDH1, CTGF, COL12A1, CNTNAP1, CDH26, COL11A2, SPON1, F11R, PDPN, ICAM3, COL22A1, FBLIM1, MFGE8, CD164, CERCAM, CD34, CPXM1, VCAN, MFAP4, ITGAL, TNF, EPDR1, COL3A1, ITGA11, CLDN11, ITGB3, ITGB1, CDH5, IGSF11, TEK, CD4, THBS1, GPNMB, SELPLG, THBS3, SPP1, FN1, DPT, COL18A1, SELP, TNXB, OLR1, COL15A1, ITGA1, PCDH12, NID1, S…	1003	306	8785	1.91776	0.000486649	4.86756e-05	0.000284757
SP_PIR_KEYWORDS	cell adhesion	29	1.45655	0.000701947	ITGAL, CLSTN3, BCAM, ITGB1, ADA, CDH5, PCDHGA2, IGSF11, PCDH1, CTGF, THBS1, SPON1, DPT, FN1, SPP1, SELP, OLR1, ICAM3, FBLIM1, PCDH12, MFGE8, CD164, CERCAM, VWF, CDH13, ITGA5, PECAM1, MFAP4, SELE	1001	111	7349	1.91809	0.297566	0.0205623	1.00693
Annotation Cluster 10	Enrichment Score: 5.572089563249668
Category	Term	Count	%	PValue	Genes	List Total	Pop Hits	Pop Total	Fold Enrichment	Bonferroni	Benjamini	FDR
GOTERM_CC_FAT	GO:0016023~cytoplasmic membrane-bounded vesicle	53	2.66198	9.12573e-07	PDIA3, PDIA4, CSPG5, SYNGR2, RABAC1, SLC1A4, SLC1A5, MALL, APOA1, C10H14ORF1, SND1, SPG21, IL1B, RAB6B, SEC24D, RAB27A, MT3, STX1A, NCF2, ERP29, MMP14, BGN, SERPINF1, IGF2R, CTSB, STEAP2, SEC23B, PRF1, TF, CLU, ITGB1, CALU, ANXA6, ECE2, CRISPLD2, HSPA5, GPNMB, EHD3, SLC30A7, PLAT, P4HB, GARS, GGH, ANXA2, VWF, LOC781339, HSP90B1, PPIB, ANXA11, CAPG, YIPF5, HSPD1, SYT17	850	218	6966	1.99243	0.000342156	2.13882e-05	0.0012609
GOTERM_CC_FAT	GO:0042470~melanosome	22	1.10497	1.01749e-06	P4HB, PDIA3, ERP29, GGH, PDIA4, MMP14, ITGB1, ANXA2, CALU, SLC1A4, ANXA6, SLC1A5, LOC781339, HSP90B1, PPIB, SERPINF1, SND1, ANXA11, CAPG, HSPA5, CTSB, RAB27A	850	56	6966	3.21958	0.000381485	2.24443e-05	0.00140585
GOTERM_CC_FAT	GO:0048770~pigment granule	22	1.10497	1.01749e-06	P4HB, PDIA3, ERP29, GGH, PDIA4, MMP14, ITGB1, ANXA2, CALU, SLC1A4, ANXA6, SLC1A5, LOC781339, HSP90B1, PPIB, SERPINF1, SND1, ANXA11, CAPG, HSPA5, CTSB, RAB27A	850	56	6966	3.21958	0.000381485	2.24443e-05	0.00140585
GOTERM_CC_FAT	GO:0031988~membrane-bounded vesicle	53	2.66198	1.90159e-06	PDIA3, PDIA4, CSPG5, SYNGR2, RABAC1, SLC1A4, SLC1A5, MALL, APOA1, C10H14ORF1, SND1, SPG21, IL1B, RAB6B, SEC24D, RAB27A, MT3, STX1A, NCF2, ERP29, MMP14, BGN, SERPINF1, IGF2R, CTSB, STEAP2, SEC23B, PRF1, TF, CLU, ITGB1, CALU, ANXA6, ECE2, CRISPLD2, HSPA5, GPNMB, EHD3, SLC30A7, PLAT, P4HB, GARS, GGH, ANXA2, VWF, LOC781339, HSP90B1, PPIB, ANXA11, CAPG, YIPF5, HSPD1, SYT17	850	223	6966	1.94776	0.000712842	3.96157e-05	0.00262739
GOTERM_CC_FAT	GO:0031410~cytoplasmic vesicle	58	2.91311	9.0094e-06	PDIA3, PDIA4, CSPG5, SYNGR2, SLC1A4, RABAC1, SLC1A5, APP, MALL, APOA1, SND1, C10H14ORF1, SMAGP, SPG21, IL1B, RAB6B, SEC24D, MT3, RAB27A, STX1A, NCF2, ERP29, MMP14, BGN, SERPINF1, IGF2R, ADAMTS1, CTSB, STEAP2, SEC23B, PRF1, TF, PAM, CLU, ITGB1, CALU, ANXA6, ECE2, CRISPLD2, HSPA5, SLC30A3, GPNMB, EHD3, SLC30A7, PLAT, P4HB, GARS, GGH, ANXA2, VWF, HSP90B1, LOC781339, PPIB, CAPG, ANXA11, YIPF5, HSPD1,…	850	265	6966	1.79369	0.00337284	0.000177802	0.0124476
GOTERM_CC_FAT	GO:0031982~vesicle	58	2.91311	2.28205e-05	PDIA3, PDIA4, CSPG5, SYNGR2, SLC1A4, RABAC1, SLC1A5, APP, MALL, APOA1, SND1, C10H14ORF1, SMAGP, SPG21, IL1B, RAB6B, SEC24D, MT3, RAB27A, STX1A, NCF2, ERP29, MMP14, BGN, SERPINF1, IGF2R, ADAMTS1, CTSB, STEAP2, SEC23B, PRF1, TF, PAM, CLU, ITGB1, CALU, ANXA6, ECE2, CRISPLD2, HSPA5, SLC30A3, GPNMB, EHD3, SLC30A7, PLAT, P4HB, GARS, GGH, ANXA2, VWF, HSP90B1, LOC781339, PPIB, CAPG, ANXA11, YIPF5, HSPD1,…	850	273	6966	1.74112	0.00852129	0.000407431	0.0315265
Annotation Cluster 11	Enrichment Score: 5.5329291819379325
Category	Term	Count	%	PValue	Genes	List Total	Pop Hits	Pop Total	Fold Enrichment	Bonferroni	Benjamini	FDR
GOTERM_MF_FAT	GO:0030246~carbohydrate binding	46	2.3104	7.01766e-11	MASP1, PGLYRP1, KLRK1, PF4, POSTN, FSTL1, DCN, CALR, LPHN2, GALM, CRISPLD2, CTGF, APOE, GALNTL4, FCN2, UPK1A, PTN, THBS1, PTX3, GPNMB, SELPLG, FN1, SELP, TNXB, OLR1, MRC2, CHI3L1, CCDC80, LGALS8, COLEC12, STAB2, GALNTL1, VEGFB, LYVE1, BGN, CLEC3B, CD34, IGF2R, GFPT1, VEGFA, GFPT2, CALR3, VCAN, ADAMTS1, SELE, CLEC14A	1013	148	9249	2.8378	6.52643e-08	6.52643e-08	1.09851e-07
GOTERM_MF_FAT	GO:0005539~glycosaminoglycan binding	21	1.05475	8.34074e-07	TNXB, CCDC80, PGLYRP1, PF4, FSTL1, POSTN, STAB2, DCN, VEGFB, LYVE1, BGN, APOE, CTGF, CRISPLD2, VEGFA, PTN, ADAMTS1, VCAN, THBS1, GPNMB, FN1	1013	56	9249	3.42386	0.000775388	0.000129273	0.00130561
GOTERM_MF_FAT	GO:0001871~pattern binding	22	1.10497	6.53202e-06	TNXB, CCDC80, PGLYRP1, PF4, FSTL1, POSTN, STAB2, DCN, VEGFB, LYVE1, BGN, APOE, CTGF, CRISPLD2, VEGFA, PTN, ADAMTS1, VCAN, THBS1, GPNMB, PTX3, FN1	1013	68	9249	2.95392	0.00605639	0.000867452	0.0102244
GOTERM_MF_FAT	GO:0030247~polysaccharide binding	22	1.10497	6.53202e-06	TNXB, CCDC80, PGLYRP1, PF4, FSTL1, POSTN, STAB2, DCN, VEGFB, LYVE1, BGN, APOE, CTGF, CRISPLD2, VEGFA, PTN, ADAMTS1, VCAN, THBS1, GPNMB, PTX3, FN1	1013	68	9249	2.95392	0.00605639	0.000867452	0.0102244
GOTERM_MF_FAT	GO:0008201~heparin binding	15	0.75339	1.74424e-05	TNXB, CCDC80, PF4, POSTN, FSTL1, VEGFB, CTGF, CRISPLD2, APOE, VEGFA, PTN, ADAMTS1, THBS1, GPNMB, FN1	1013	37	9249	3.70148	0.0160907	0.00180077	0.0273
SP_PIR_KEYWORDS	heparin-binding	9	0.452034	0.0145655	VEGFB, APOE, CTGF, VEGFA, PTN, PF4, FSTL1, THBS1, FN1	1001	25	7349	2.643	0.999377	0.190118	19.0606
Annotation Cluster 12	Enrichment Score: 5.092398543041792
Category	Term	Count	%	PValue	Genes	List Total	Pop Hits	Pop Total	Fold Enrichment	Bonferroni	Benjamini	FDR
GOTERM_BP_FAT	GO:0001944~vasculature development	36	1.80814	1.07863e-07	CAV1, ACVRL1, EDN1, COL3A1, PRRX1, GJA1, ANPEP, GJA4, MMP2, CDH5, GJC1, BAK1, PTK2, APOE, CTGF, SEMA3C, ANGPT1, NOS3, SOX18, LOX, THBS1, NR2F2, PPAP2B, ANGPTL4, SCG2, EPAS1, PDPN, KDR, ANXA2, CDH13, LAMA4, DLL4, VEGFA, ECSCR, COL1A2, COL1A1	1003	121	8785	2.6059	0.000333025	3.70083e-05	0.000194851
GOTERM_BP_FAT	GO:0001568~blood vessel development	35	1.75791	1.81555e-07	CAV1, ACVRL1, EDN1, COL3A1, PRRX1, GJA1, ANPEP, GJA4, MMP2, CDH5, GJC1, BAK1, PTK2, APOE, CTGF, SEMA3C, ANGPT1, NOS3, SOX18, LOX, THBS1, NR2F2, PPAP2B, ANGPTL4, SCG2, EPAS1, KDR, ANXA2, CDH13, LAMA4, DLL4, VEGFA, ECSCR, COL1A2, COL1A1	1003	118	8785	2.59793	0.000560485	5.09662e-05	0.000327974
GOTERM_BP_FAT	GO:0048514~blood vessel morphogenesis	26	1.30588	8.75695e-05	CAV1, ACVRL1, EDN1, PRRX1, GJA1, ANPEP, GJC1, BAK1, PTK2, APOE, CTGF, SEMA3C, NOS3, SOX18, ANGPT1, NR2F2, THBS1, ANGPTL4, SCG2, EPAS1, KDR, ANXA2, CDH13, DLL4, VEGFA, ECSCR	1003	99	8785	2.30027	0.236946	0.00748371	0.158074
GOTERM_BP_FAT	GO:0001525~angiogenesis	17	0.853842	0.00248985	ACVRL1, EPAS1, EDN1, ANPEP, ANXA2, CDH13, PTK2, CTGF, DLL4, VEGFA, ECSCR, SOX18, NOS3, ANGPT1, THBS1, SCG2, ANGPTL4	1003	66	8785	2.25603	0.999546	0.0846835	4.40354
Annotation Cluster 13	Enrichment Score: 4.6379623549199005
Category	Term	Count	%	PValue	Genes	List Total	Pop Hits	Pop Total	Fold Enrichment	Bonferroni	Benjamini	FDR
UP_SEQ_FEATURE	topological domain:Cytoplasmic	152	7.63435	1.03243e-09	MPZL1, ADORA3, SLC6A4, F2RL1, TSPAN6, TLR3, AQP1, AQP3, SSR1, LPHN2, SLC16A1, APP, CISD1, LRRC59, ERAP2, FAS, ASPH, RPN2, PI16, DDOST, F11R, TMEM206, CD3G, KCND1, CD3D, TMEM167A, CD3E, GPR133, GOLT1B, DPAGT1, COLEC12, SIRPA, TMEM150B, TRAT1, CD37, CCR7, THBD, CCR5, DARC, SEC61G, TM4SF18, GGCX, ITGAL, TPST2, PAM, CAV1, SCN1B, STX7, DERL1, TMEM229B, DERL3, ITGB1, IL12RB2, ADRB3, HCRTR1, ECE2, PROCR…	737	739	5635	1.57263	1.88419e-06	3.76838e-07	1.7561e-06
SP_PIR_KEYWORDS	transmembrane	288	14.4651	2.07748e-07	SLC9A9, ADORA3, EPT1, AQP1, AQP3, SSR1, S1PR2, LPHN2, S1PR3, TMEM147, APP, MALL, ATP2B4, ERAP2, FAS, PI16, APOO, F11R, CRTAM, CD3G, CD3D, GPR133, CD3E, TMEM22, DPAGT1, COLEC12, SIRPA, TMEM150B, CD37, LETM1, CCR7, CCR5, CCR4, SURF4, PMP22, BLCAP, BOLA-DYB, GGCX, TPST2, SCN1B, C29H11ORF75, CYP51A1, PTPLAD2, SFXN3, FCGRT, SFXN1, SFXN2, TMEM229B, HCRTR1, ADRB3, PROCR, UPK1A, TRAM1, NAT14, LAPTM4B, MA…	1001	1639	7349	1.29005	0.000104492	1.16108e-05	0.000299418
UP_SEQ_FEATURE	transmembrane region	216	10.8488	3.93458e-07	ADORA3, EPT1, AQP1, AQP3, SSR1, LPHN2, TMEM147, APP, ERAP2, FAS, PI16, APOO, F11R, CD3G, CD3D, GPR133, CD3E, DPAGT1, COLEC12, SIRPA, TMEM150B, CD37, CCR7, LETM1, CCR5, SURF4, PMP22, BLCAP, GGCX, TPST2, SCN1B, C29H11ORF75, CYP51A1, PTPLAD2, SFXN3, SFXN1, SFXN2, TMEM229B, ADRB3, HCRTR1, PROCR, UPK1A, TRAM1, NAT14, LAPTM4B, SCD, MAOA, IFI27L2, TMEM39A, CLGN, SLC27A1, GJA1, ANPEP, GJA4, EDNRA, RABAC1…	737	1235	5635	1.33725	0.000717804	0.00011967	0.000669245
UP_SEQ_FEATURE	topological domain:Extracellular	107	5.37418	1.19295e-06	MPZL1, ADORA3, F2RL1, SLC6A4, TSPAN6, AQP1, AQP3, LPHN2, SLC16A1, APP, FAS, PI16, F11R, TMEM206, CD3G, TMEM167A, CD3D, CD3E, GPR133, COLEC12, SIRPA, TMEM150B, TRAT1, CD37, CCR7, THBD, CCR5, DARC, SEC61G, TM4SF18, ITGAL, SCN1B, TMEM229B, ITGB1, IL12RB2, ADRB3, HCRTR1, PROCR, ICOS, UPK1A, TEK, ENTPD1, SLC30A7, TMEM97, TLR10, SLC6A15, SLC6A17, LYVE1, ITGA5, ECSCR, TM4SF20, SLC27A1, CLDN4, CD8A, CLDN…	737	527	5635	1.55239	0.00217476	0.00031097	0.00202911
SP_PIR_KEYWORDS	membrane	320	16.0723	4.68737e-05	ADORA3, S100A8, S100A9, EPT1, AQP1, AQP3, SSR1, LPHN2, TMEM147, APP, MALL, ATP2B4, PLOD1, ERAP2, FAS, RAB26, PI16, RAB27B, GNG5, APOO, F11R, CRTAM, CD3G, GATM, CD3D, CD3E, ROCK2, GPR133, DPAGT1, COLEC12, SIRPA, TMEM150B, CD37, LETM1, CCR7, CCR5, CCR4, SURF4, PMP22, BLCAP, GGCX, TPST2, SCN1B, C29H11ORF75, CYP51A1, PTPLAD2, SFXN3, SFXN1, SFXN2, NRN1, TMEM229B, ADA, HCRTR1, ADRB3, PROCR, UPK1A, TRAM…	1001	1963	7349	1.19681	0.0233022	0.00196291	0.0675356
GOTERM_CC_FAT	GO:0031224~intrinsic to membrane	366	18.3827	0.839063	SLC9A9, HM13, ADORA3, AQP9, ADCY6, EPT1, AQP1, AQP3, SSR1, S1PR2, LPHN2, S1PR3, TMEM147, APP, MALL, ATP2B4, C10H14ORF1, S1PR5, ERAP2, FAS, RAB26, PI16, RAB27B, APOO, F11R, CRTAM, CD3G, CD3D, PDPN, CD3E, GPR133, TMEM22, DPAGT1, COLEC12, GPR132, SIRPA, TMEM150B, CD37, LETM1, CCR7, CCR5, CCR4, SURF4, PDGFRB, PMP22, BLCAP, BOLA-DYB, GGCX, TPST2, SLC2A10, SCN1B, C29H11ORF75, CYP51A1, PTPLAD2, ITGA11, …	850	3101	6966	0.967261	1	0.996683	100
GOTERM_CC_FAT	GO:0016021~integral to membrane	353	17.7298	0.86421	SLC9A9, HM13, ADORA3, AQP9, ADCY6, EPT1, AQP1, AQP3, SSR1, S1PR2, LPHN2, S1PR3, TMEM147, APP, MALL, ATP2B4, C10H14ORF1, S1PR5, ERAP2, FAS, PI16, APOO, F11R, CRTAM, CD3G, CD3D, PDPN, CD3E, GPR133, TMEM22, DPAGT1, COLEC12, GPR132, SIRPA, TMEM150B, CD37, LETM1, CCR7, CCR5, CCR4, SURF4, PDGFRB, PMP22, BLCAP, BOLA-DYB, GGCX, TPST2, SLC2A10, SCN1B, C29H11ORF75, CYP51A1, PTPLAD2, ITGA11, SFXN3, FCGRT, S…	850	3006	6966	0.962388	1	0.996985	100
Annotation Cluster 14	Enrichment Score: 4.618629633865003
Category	Term	Count	%	PValue	Genes	List Total	Pop Hits	Pop Total	Fold Enrichment	Bonferroni	Benjamini	FDR
GOTERM_CC_FAT	GO:0044432~endoplasmic reticulum part	45	2.26017	1.57579e-10	DERL1, HM13, PDIA3, CLSTN3, CYP51A1, PDIA5, PDIA4, CALR, SERPINH1, CALU, PIGK, STT3A, DNAJB11, SRPR, SEC22B, CD4, ELOVL6, HSPA5, ASPH, RPN2, ERO1L, DDOST, SEC61A1, P4HB, HERPUD1, ERP27, ERP29, DPAGT1, CERCAM, KRTCAP2, SELS, ERP44, HSP90B1, SEC61B, PPIB, SPCS3, SIL1, SPCS1, CALR3, DPM3, FKBP10, RCN3, EIF2AK3, SEC23B, SSR3	850	133	6966	2.77284	5.90922e-08	7.38653e-09	2.17727e-07
GOTERM_CC_FAT	GO:0042175~nuclear envelope-endoplasmic reticulum network	30	1.50678	1.61163e-05	DERL1, HM13, CYP51A1, CLSTN3, EIF5A, PIGK, STT3A, SRPR, SEC22B, CD4, ELOVL6, RPN2, ERO1L, ASPH, DDOST, SEC61A1, HERPUD1, DPAGT1, KRTCAP2, SELS, ERP44, SEC61B, NUCB2, SPCS3, SPCS1, YIPF5, DPM3, EIF2AK3, SEC23B, SSR3	850	106	6966	2.31942	0.00602545	0.000302138	0.0222657
GOTERM_CC_FAT	GO:0005789~endoplasmic reticulum membrane	27	1.3561	0.000133261	HM13, DERL1, CYP51A1, CLSTN3, PIGK, STT3A, SRPR, SEC22B, CD4, RPN2, ERO1L, ASPH, ELOVL6, DDOST, SEC61A1, HERPUD1, DPAGT1, KRTCAP2, SELS, ERP44, SEC61B, SPCS3, SPCS1, DPM3, EIF2AK3, SEC23B, SSR3	850	101	6966	2.19082	0.0487479	0.00226907	0.183969
GOTERM_CC_FAT	GO:0012505~endomembrane system	60	3.01356	0.00030625	HM13, CLSTN3, AP2S1, EIF5A, CSPG5, ST6GALNAC6, PIGK, TMEM109, MALL, ST3GAL2, SRPR, GPX4, OIT3, ELOVL6, ASPH, RPN2, DDOST, SEC24D, STX1A, DPAGT1, KRTCAP2, BCAP31, SEC61B, CHPF, IGF2R, NUCB2, STEAP2, EIF2AK3, SEC23B, TRAPPC3, CAV1, DERL1, MTDH, HAX1, CYP51A1, BET1, ECE2, STT3A, ALOX5AP, CACYBP, SEC22B, CD4, ERO1L, SEC61A1, LAPTM4B, HERPUD1, LMNA, SELS, ERP44, ST8SIA5, ANXA11, SPCS3, SEC13, SPCS1, D…	850	312	6966	1.57602	0.10851	0.00498152	0.422316
GOTERM_CC_FAT	GO:0031090~organelle membrane	78	3.91763	0.0778588	HM13, CLSTN3, TLR3, CSPG5, UQCRQ, EFHD1, ST6GALNAC6, SLC25A20, BAK1, PIGK, TMEM109, MALL, CISD1, ST3GAL2, SLC25A24, SRPR, GPX4, SLC25A26, RPN2, ASPH, ELOVL6, DDOST, SEC24D, STX1A, NDUFB10, GATM, DPAGT1, KRTCAP2, BCAP31, DHRS1, LETM1, SEC61B, CYP27A1, CHPF, NUCB2, STEAP2, EIF2AK3, SEC23B, MDH2, TRAPPC3, UQCRB, CAV1, DERL1, MTDH, HAX1, CYP51A1, BET1, SFXN1, SFXN2, ACAT1, ECE2, STT3A, ALOX5AP, ETFDH…	850	542	6966	1.1794	1	0.455522	67.3709
Annotation Cluster 15	Enrichment Score: 4.2321809507521975
Category	Term	Count	%	PValue	Genes	List Total	Pop Hits	Pop Total	Fold Enrichment	Bonferroni	Benjamini	FDR
GOTERM_BP_FAT	GO:0042060~wound healing	23	1.1552	9.41726e-06	EFEMP2, F13A1, F2RL1, GJA1, PF4, DTNBP1, PROC, VWF, THBD, PROCR, ITGA5, PECAM1, F2, TFPI, NOS3, ENTPD1, PAPSS2, TFPI2, PROS1, FN1, F2R, RAB27A, MYH10	1003	72	8785	2.79793	0.0286619	0.00132097	0.0170106
GOTERM_BP_FAT	GO:0050878~regulation of body fluid levels	21	1.05475	9.64273e-06	PTGER3, EFEMP2, F13A1, EDN1, F2RL1, PF4, DTNBP1, PROC, VWF, KCNN4, THBD, PROCR, F2, TFPI, NOS3, ENTPD1, PAPSS2, TFPI2, PROS1, F2R, RAB27A	1003	62	8785	2.96666	0.0293379	0.00129381	0.0174179
GOTERM_BP_FAT	GO:0050817~coagulation	18	0.904068	2.75969e-05	EFEMP2, F13A1, F2RL1, PF4, DTNBP1, PROC, VWF, THBD, PROCR, F2, TFPI, NOS3, ENTPD1, TFPI2, PROS1, PAPSS2, RAB27A, F2R	1003	51	8785	3.09131	0.0816902	0.00340302	0.0498413
GOTERM_BP_FAT	GO:0007596~blood coagulation	18	0.904068	2.75969e-05	EFEMP2, F13A1, F2RL1, PF4, DTNBP1, PROC, VWF, THBD, PROCR, F2, TFPI, NOS3, ENTPD1, TFPI2, PROS1, PAPSS2, RAB27A, F2R	1003	51	8785	3.09131	0.0816902	0.00340302	0.0498413
GOTERM_BP_FAT	GO:0007599~hemostasis	18	0.904068	4.837e-05	EFEMP2, F13A1, F2RL1, PF4, DTNBP1, PROC, VWF, THBD, PROCR, F2, TFPI, NOS3, ENTPD1, TFPI2, PROS1, PAPSS2, RAB27A, F2R	1003	53	8785	2.97466	0.13875	0.0048068	0.087343
SP_PIR_KEYWORDS	blood coagulation	10	0.50226	0.0120918	VWF, THBD, PROCR, F13A1, F2, NOS3, PROS1, TFPI2, PROC, F2R	1001	29	7349	2.53161	0.9978	0.164712	16.0825
Annotation Cluster 16	Enrichment Score: 3.93069544089659
Category	Term	Count	%	PValue	Genes	List Total	Pop Hits	Pop Total	Fold Enrichment	Bonferroni	Benjamini	FDR
INTERPRO	IPR013783:Immunoglobulin-like fold	61	3.06379	2.04239e-07	MPZL1, ADORA3, CD8A, IGFBP7, F13A1, DSB, FCRL1, BCAM, IL1RAP, SEMA3C, ESAM, TIE1, LOC509513, BOLA-DRB2, KIRREL3, F11R, CRTAM, CD3G, CD3D, CD3E, ICAM3, PALLD, SIRPA, NCR1, BOLA-DQA1, CD86, PDGFRB, LOC407171, VCAN, JSP.1, TREM1, BOLA-DYA, TREM2, LOC790811, JAM3, KIR3DL2, BOLA-DYB, IL1R2, SCN1B, LOC786695, FCGRT, IGSF11, KDELC1, TEK, MYBPH, CD2, TGM3, CD4, CD7, FCER1A, EPB42, CD276, KIR2DS1, MCAM, M…	1235	231	9171	1.96095	0.000352659	8.81765e-05	0.000345133
INTERPRO	IPR003599:Immunoglobulin subtype	36	1.80814	4.56616e-06	IL1R2, IGFBP7, FCRL1, BCAM, IGSF11, MYBPH, IL1RAP, SEMA3C, CD4, ESAM, TIE1, LOC509513, CD7, KIRREL3, FCER1A, F11R, CRTAM, ICAM3, CD276, SLAMF6, KIR2DS1, MCAM, SIRPA, NCR1, CD83, VSTM2L, PECAM1, PDGFRB, LOC407171, SCN4B, VCAN, TREM1, TREM2, JAM3, MYLK, KIR3DL2	1235	120	9171	2.22777	0.00785476	0.000985236	0.00771584
SMART	SM00409:IG	36	1.80814	2.93787e-05	IL1R2, IGFBP7, FCRL1, BCAM, IGSF11, MYBPH, IL1RAP, SEMA3C, CD4, ESAM, TIE1, LOC509513, CD7, KIRREL3, FCER1A, F11R, CRTAM, ICAM3, CD276, SLAMF6, KIR2DS1, MCAM, SIRPA, NCR1, CD83, VSTM2L, PECAM1, PDGFRB, LOC407171, SCN4B, VCAN, TREM1, TREM2, JAM3, MYLK, KIR3DL2	644	120	4364	2.03292	0.0084255	0.00281643	0.0390074
INTERPRO	IPR007110:Immunoglobulin-like	48	2.41085	0.000102007	IL1R2, MPZL1, LOC786695, CD8A, IGFBP7, DSB, FCRL1, FCGRT, BCAM, IGSF11, IL1RAP, TEK, MYBPH, ROBO4, SEMA3C, CD4, ESAM, LOC509513, BOLA-DRB2, CD7, KIRREL3, FCER1A, F11R, CRTAM, CD276, SLAMF6, MCAM, PALLD, SIRPA, MGC126945, NCR1, CD1E, BOLA-DQA1, CD83, CD86, VSTM2L, PECAM1, SCN4B, LOC407171, JSP.1, VCAN, TREM1, BOLA-DYA, TREM2, LOC790811, JAM3, MYLK, BOLA-DYB	1235	203	9171	1.75588	0.161529	0.0125051	0.172237
SP_PIR_KEYWORDS	Immunoglobulin domain	25	1.25565	0.000594618	MPZL1, SCN1B, CD8A, BCAM, IGSF11, ICOS, TEK, SEMA3C, TIE1, KIRREL3, F11R, CRTAM, CD3G, CD3E, ICAM3, CD276, MCAM, SIRPA, NCR1, PECAM1, SCN4B, VCAN, TREM1, SEMA4A, MYLK	1001	89	7349	2.06226	0.258575	0.0197479	0.853586
INTERPRO	IPR013151:Immunoglobulin	18	0.904068	0.00996855	FCER1A, F11R, IL1R2, SCN1B, ICAM3, KIR2DS1, FCRL1, BCAM, MCAM, NCR1, IGSF11, PECAM1, PDGFRB, LOC407171, CD4, TIE1, JAM3, KIR3DL2	1235	70	9171	1.90952	1	0.485965	15.5743
INTERPRO	IPR013106:Immunoglobulin V-set	20	1.00452	0.0184463	F11R, MPZL1, CRTAM, CD8A, CD276, MCAM, SIRPA, IGSF11, CD83, PECAM1, VSTM2L, SCN4B, VCAN, ESAM, TREM1, LOC509513, TREM2, JAM3, CD7, KIRREL3	1235	86	9171	1.72696	1	0.590645	26.9938
Annotation Cluster 17	Enrichment Score: 3.6615413321241173
Category	Term	Count	%	PValue	Genes	List Total	Pop Hits	Pop Total	Fold Enrichment	Bonferroni	Benjamini	FDR
GOTERM_BP_FAT	GO:0016477~cell migration	29	1.45655	5.76785e-05	SCHIP1, TNF, IL16, PAX6, GJA1, PF4, ITGB1, PTK2, APOA1, CTGF, IFNG, IL1B, SEMA3C, NOS3, NR2F2, SELPLG, SCG2, PLAT, SELP, IL8, MMP14, KDR, CDH13, CD34, ITGA5, CCR4, SELE, APBB1, MYH10	1003	114	8785	2.2281	0.163155	0.00538292	0.104143
GOTERM_BP_FAT	GO:0006928~cell motion	33	1.65746	0.000239562	SCHIP1, TNF, IL16, PAX6, GJA1, PF4, ITGB1, DSTN, PTK2, APOA1, CTGF, IFNG, IL1B, SEMA3C, ETV1, NOS3, NR2F2, SELPLG, SCG2, PLAT, SELP, IL8, PDPN, MMP14, KDR, CDH13, CD34, CCR4, ITGA5, BMPR1B, SELE, APBB1, MYH10	1003	148	8785	1.95296	0.522817	0.0156183	0.431878
GOTERM_BP_FAT	GO:0048870~cell motility	29	1.45655	0.000271058	SCHIP1, TNF, IL16, PAX6, GJA1, PF4, ITGB1, PTK2, APOA1, CTGF, IFNG, IL1B, SEMA3C, NOS3, NR2F2, SELPLG, SCG2, PLAT, SELP, IL8, MMP14, KDR, CDH13, CD34, ITGA5, CCR4, SELE, APBB1, MYH10	1003	124	8785	2.04841	0.567053	0.0166034	0.488527
GOTERM_BP_FAT	GO:0051674~localization of cell	29	1.45655	0.000271058	SCHIP1, TNF, IL16, PAX6, GJA1, PF4, ITGB1, PTK2, APOA1, CTGF, IFNG, IL1B, SEMA3C, NOS3, NR2F2, SELPLG, SCG2, PLAT, SELP, IL8, MMP14, KDR, CDH13, CD34, ITGA5, CCR4, SELE, APBB1, MYH10	1003	124	8785	2.04841	0.567053	0.0166034	0.488527
GOTERM_BP_FAT	GO:0050900~leukocyte migration	11	0.552486	0.000484997	SELP, TNF, IL8, IL16, CD34, IFNG, IL1B, PF4, SELPLG, SELE, SCG2	1003	27	8785	3.56837	0.776431	0.0278691	0.872517
Annotation Cluster 18	Enrichment Score: 3.3938739708444428
Category	Term	Count	%	PValue	Genes	List Total	Pop Hits	Pop Total	Fold Enrichment	Bonferroni	Benjamini	FDR
GOTERM_MF_FAT	GO:0042379~chemokine receptor binding	17	0.853842	1.22435e-07	CCL3, IL8, LOC508666, LOC525415, CXCL9, PF4, CCL5, CCL4, CXCL10, CCL17, CCL24, CCL22, CCL14, CCL20, LOC616364, CXCL14, CCL21, CXCL13	1013	34	9249	4.56515	0.000113858	3.79542e-05	0.000191654
GOTERM_MF_FAT	GO:0008009~chemokine activity	17	0.853842	1.22435e-07	CCL3, IL8, LOC508666, LOC525415, CXCL9, PF4, CCL5, CCL4, CXCL10, CCL17, CCL24, CCL22, CCL14, CCL20, LOC616364, CXCL14, CCL21, CXCL13	1013	34	9249	4.56515	0.000113858	3.79542e-05	0.000191654
GOTERM_MF_FAT	GO:0005125~cytokine activity	29	1.45655	3.52986e-07	CCL3, TNF, IL16, LOC525415, CXCL9, FASLG, PF4, IL33, CCL5, CCL4, CXCL10, CCL24, IL17D, CCL22, CCL20, CCL21, IFNG, IL1B, LTA, SCG2, SPP1, IL4, IL8, LOC508666, CCL17, CCL14, CXCL14, LOC616364, CXCL13, VEGFA	1013	93	9249	2.84708	0.000328223	6.56533e-05	0.000552547
INTERPRO	IPR001811:Small chemokine, interleukin-8-like	14	0.703164	2.33667e-05	CCL3, IL8, CXCL9, PF4, CCL5, CCL4, CXCL10, CCL24, CCL22, CCL14, CXCL14, CCL20, CXCL13, CCL21	1235	28	9171	3.71296	0.0395513	0.00335724	0.0394788
SP_PIR_KEYWORDS	chemotaxis	13	0.652938	3.55441e-05	CCL3, IL16, S100A8, IL8, S100A9, CXCR2, PF4, CCL5, CCL4, CXCL10, CCL20, ECSCR, PTAFR	1001	25	7349	3.81766	0.0177201	0.0017863	0.0512159
SMART	SM00199:SCY	14	0.703164	6.03041e-05	CCL3, IL8, CXCL9, PF4, CCL5, CCL4, CXCL10, CCL24, CCL22, CCL14, CXCL14, CCL20, CXCL13, CCL21	644	28	4364	3.3882	0.0172182	0.00433261	0.0800531
GOTERM_BP_FAT	GO:0042330~taxis	17	0.853842	0.000179691	CCL3, IL8, IL16, PF4, CXCR2, CCL5, CCL4, CXCL10, CCL24, CCR7, CCL20, CCR4, ECSCR, IFNG, IL1B, PTAFR, SCG2	1003	53	8785	2.8094	0.425891	0.012533	0.324109
GOTERM_BP_FAT	GO:0006935~chemotaxis	17	0.853842	0.000179691	CCL3, IL8, IL16, PF4, CXCR2, CCL5, CCL4, CXCL10, CCL24, CCR7, CCL20, CCR4, ECSCR, IFNG, IL1B, PTAFR, SCG2	1003	53	8785	2.8094	0.425891	0.012533	0.324109
KEGG_PATHWAY	bta04062:Chemokine signaling pathway	39	1.95881	0.00026077	PRKCZ, CCL3, ADCY6, CXCL9, LOC525415, NFKBIA, PF4, CXCR2, CXCR3, CCL5, CCL4, CXCL10, CCL24, CCL22, STAT4, PTK2, CCL20, CCL21, CXCR6, CCR10, SHC1, PIK3R5, PLCB1, SHC2, GNG5, ITK, IL8, ROCK2, LOC529196, STAT1, CCL16, CCL17, STAT2, CCR7, CCL14, CCR5, CXCL14, LOC616364, CCR4, CXCL13, IKBKB	624	171	4940	1.80556	0.0466061	0.00594813	0.321613
SP_PIR_KEYWORDS	inflammatory response	14	0.703164	0.000564125	TLR10, CCL3, OLR1, IL8, C3, CXCL9, TLR3, CCL5, CCL4, S100A12, CD163, CXCL10, CCL20, IL1B	1001	36	7349	2.85509	0.247109	0.0200698	0.809978
SP_PIR_KEYWORDS	cytokine	22	1.10497	0.000619394	IL4, CCL3, TNF, IL8, IL16, CXCL9, FASLG, PF4, CCL5, CCL4, CXCL10, CCL24, CCL22, CCL14, CCL20, CCL21, CXCL13, IFNG, IL1B, PTN, LTA, SPP1	1001	74	7349	2.18266	0.267763	0.0192897	0.889004
PIR_SUPERFAMILY	PIRSF002522:CXC chemokine	6	0.301356	0.00576257	IL8, CXCL14, CXCL13, CXCL9, PF4, CXCL10	589	9	3890	4.40294	0.965586	0.965586	8.15053
PIR_SUPERFAMILY	PIRSF001950:small inducible chemokine, C/CC types	7	0.351582	0.00772239	CCL24, CCL3, CCL14, CCL20, CCL21, CCL5, CCL4	589	13	3890	3.55622	0.989107	0.89563	10.7783
GOTERM_BP_FAT	GO:0007626~locomotory behavior	21	1.05475	0.00833211	CCL3, IL8, IL16, SNCA, PF4, CXCR2, CCL5, ASL, CCL4, CXCL10, CCL24, CCR7, CCL20, PDE1B, CCR4, IFNG, ECSCR, IL1B, RASD2, PTAFR, SCG2	1003	100	8785	1.83933	1	0.186735	14.0279
INTERPRO	IPR002473:Small chemokine, C-X-C/Interleukin 8	5	0.25113	0.0350009	CCL22, IL8, CXCL14, PF4, CXCL10	1235	10	9171	3.71296	1	0.768921	45.2318
INTERPRO	IPR001089:Small chemokine, C-X-C	5	0.25113	0.0350009	IL8, CXCL13, CXCL9, PF4, CXCL10	1235	10	9171	3.71296	1	0.768921	45.2318
GOTERM_BP_FAT	GO:0007610~behavior	28	1.40633	0.0381754	CCL3, IL16, SNCA, PF4, CXCR2, ASL, CCL5, CCL4, CXCL10, S1PR2, CCL24, APP, CCL20, PDE1B, NMUR2, IFNG, IL1B, ETV1, PTN, SCG2, IL8, CCR7, ITGA5, CCR4, ECSCR, APBB1, PTAFR, RASD2	1003	167	8785	1.46853	1	0.472357	50.497
INTERPRO	IPR000827:Small chemokine, C-C group, conserved site	5	0.25113	0.0492831	CCL22, CCL3, CCL20, CCL5, CCL4	1235	11	9171	3.37541	1	0.843866	57.4305
INTERPRO	IPR018048:Small chemokine, C-X-C, conserved site	5	0.25113	0.0492831	IL8, CXCL13, CXCL9, PF4, CXCL10	1235	11	9171	3.37541	1	0.843866	57.4305
Annotation Cluster 19	Enrichment Score: 3.2575759458477225
Category	Term	Count	%	PValue	Genes	List Total	Pop Hits	Pop Total	Fold Enrichment	Bonferroni	Benjamini	FDR
GOTERM_BP_FAT	GO:0006457~protein folding	33	1.65746	2.22658e-06	FKBP9, FKBP7, FKBP5, FKBP4, CALR, CANX, HSPH1, DNAJB11, HSPE1, ERO1L, HSPA9, AARS, CCT6A, TOR2A, PPIF, ERP44, CCT5, HSP90B1, LOC781339, CLGN, DNAJB9, PPIB, PPID, PPIC, TBCC, FKBP14, CALR3, DNAJB1, HSPD1, FKBP10, DNAJB4, FKBP11, FKBP2	1003	119	8785	2.42889	0.00685212	0.000491001	0.00402218
SP_PIR_KEYWORDS	Chaperone	25	1.25565	0.00439657	ATOX1, HSPA1A, CALR, CANX, SERPINH1, NDUFAF2, DNAJB11, BAG2, DNAJC6, HSPE1, DNAJC3, HSPA9, P4HB, MESDC2, CCT6A, ERP44, CCT5, HSP90B1, LOC781339, CLGN, TBCC, CALR3, DNAJB1, HSPD1, DNAJB4	1001	102	7349	1.79943	0.890994	0.0848378	6.15309
GOTERM_MF_FAT	GO:0051082~unfolded protein binding	14	0.703164	0.0172393	CCT6A, CALR, SERPINH1, CANX, LOC781339, HSP90B1, CCT5, CLGN, DNAJB9, DNAJB11, CALR3, DNAJB1, DNAJB4, HSPA9	1013	63	9249	2.02896	1	0.319587	23.8305
Annotation Cluster 20	Enrichment Score: 3.2100089920242043
Category	Term	Count	%	PValue	Genes	List Total	Pop Hits	Pop Total	Fold Enrichment	Bonferroni	Benjamini	FDR
GOTERM_BP_FAT	GO:0051789~response to protein stimulus	20	1.00452	3.52381e-08	EGR1, HERPUD1, DERL1, AARS, MANF, SELS, ERP44, P2RX7, MSX1, ID2, NMUR2, IFNG, CD4, ERO1L, HSPD1, ID3, FAS, DNAJC3, EIF2AK3, SERP1	1003	42	8785	4.17082	0.000108809	1.55449e-05	6.36565e-05
GOTERM_BP_FAT	GO:0006986~response to unfolded protein	12	0.602712	3.93713e-05	ERP44, HERPUD1, DERL1, AARS, IFNG, HSPD1, ERO1L, DNAJC3, EIF2AK3, SELS, MANF, SERP1	1003	25	8785	4.20419	0.114481	0.00449288	0.0710993
GOTERM_BP_FAT	GO:0006984~ER-nuclear signaling pathway	9	0.452034	0.000662901	DERL1, ATP2A2, AARS, IFNG, CCDC47, ERO1L, EIF2AK3, SELS, SERP1	1003	19	8785	4.14887	0.870971	0.0341117	1.19076
GOTERM_BP_FAT	GO:0034620~cellular response to unfolded protein	7	0.351582	0.00632385	DERL1, AARS, IFNG, ERO1L, EIF2AK3, SELS, SERP1	1003	16	8785	3.83194	1	0.16179	10.8278
GOTERM_BP_FAT	GO:0030968~endoplasmic reticulum unfolded protein response	7	0.351582	0.00632385	DERL1, AARS, IFNG, ERO1L, EIF2AK3, SELS, SERP1	1003	16	8785	3.83194	1	0.16179	10.8278
GOTERM_BP_FAT	GO:0034976~response to endoplasmic reticulum stress	8	0.401808	0.00895816	DERL1, AARS, IFNG, CCDC47, ERO1L, EIF2AK3, SELS, SERP1	1003	22	8785	3.18499	1	0.196517	15.0031
GOTERM_BP_FAT	GO:0006983~ER overload response	3	0.150678	0.102828	CCDC47, EIF2AK3, SELS	1003	5	8785	5.25523	1	0.728499	85.9165
Annotation Cluster 21	Enrichment Score: 2.883060346506544
Category	Term	Count	%	PValue	Genes	List Total	Pop Hits	Pop Total	Fold Enrichment	Bonferroni	Benjamini	FDR
GOTERM_BP_FAT	GO:0040012~regulation of locomotion	24	1.20542	4.29479e-06	ADORA3, IL8, IL16, MMP9, SNCA, F2RL1, PAX6, ITGB3, ADA, VCL, KDR, CDH13, LAMA4, APOE, LAMA5, CLIC4, RRAS2, DLL4, PECAM1, TEK, TIE1, THBS1, F2R, SCG2	1003	74	8785	2.84067	0.0131748	0.000779833	0.00775812
GOTERM_BP_FAT	GO:0030334~regulation of cell migration	20	1.00452	4.63703e-05	ADORA3, MMP9, F2RL1, PAX6, ITGB3, ADA, VCL, KDR, CDH13, LAMA4, APOE, LAMA5, CLIC4, RRAS2, DLL4, PECAM1, TEK, TIE1, THBS1, F2R	1003	63	8785	2.78055	0.133415	0.00492558	0.0837334
GOTERM_BP_FAT	GO:0051270~regulation of cell motion	21	1.05475	6.94761e-05	ADORA3, PDPN, MMP9, F2RL1, PAX6, ITGB3, ADA, VCL, KDR, CDH13, LAMA4, APOE, LAMA5, CLIC4, RRAS2, DLL4, PECAM1, TEK, TIE1, THBS1, F2R	1003	70	8785	2.62762	0.193095	0.00629041	0.125432
GOTERM_BP_FAT	GO:0032103~positive regulation of response to external stimulus	12	0.602712	0.000137219	FCER1A, CDH13, ADORA3, IL8, IL16, C3, F2RL1, IDO1, LBP, THBS1, KDR, SCG2	1003	28	8785	3.75374	0.345421	0.0102824	0.247593
GOTERM_BP_FAT	GO:0050920~regulation of chemotaxis	7	0.351582	0.00109049	CDH13, IL8, IL16, F2RL1, THBS1, KDR, SCG2	1003	12	8785	5.10926	0.965586	0.0512833	1.95172
GOTERM_BP_FAT	GO:0050921~positive regulation of chemotaxis	7	0.351582	0.00109049	CDH13, IL8, IL16, F2RL1, THBS1, KDR, SCG2	1003	12	8785	5.10926	0.965586	0.0512833	1.95172
GOTERM_BP_FAT	GO:0048520~positive regulation of behavior	7	0.351582	0.00109049	CDH13, IL8, IL16, F2RL1, THBS1, KDR, SCG2	1003	12	8785	5.10926	0.965586	0.0512833	1.95172
GOTERM_BP_FAT	GO:0050926~regulation of positive chemotaxis	6	0.301356	0.00162278	CDH13, IL8, IL16, F2RL1, KDR, SCG2	1003	9	8785	5.83915	0.993364	0.0663949	2.89127
GOTERM_BP_FAT	GO:0050927~positive regulation of positive chemotaxis	6	0.301356	0.00162278	CDH13, IL8, IL16, F2RL1, KDR, SCG2	1003	9	8785	5.83915	0.993364	0.0663949	2.89127
GOTERM_BP_FAT	GO:0050795~regulation of behavior	7	0.351582	0.00436828	CDH13, IL8, IL16, F2RL1, THBS1, KDR, SCG2	1003	15	8785	4.0874	0.999999	0.125278	7.60382
GOTERM_BP_FAT	GO:0040017~positive regulation of locomotion	11	0.552486	0.00563039	CDH13, ADORA3, IL8, IL16, RRAS2, MMP9, F2RL1, THBS1, KDR, SCG2, F2R	1003	36	8785	2.67628	1	0.147823	9.69693
GOTERM_BP_FAT	GO:0051272~positive regulation of cell motion	9	0.452034	0.0339803	CDH13, ADORA3, PDPN, RRAS2, MMP9, F2RL1, THBS1, KDR, F2R	1003	34	8785	2.31849	1	0.443767	46.4479
GOTERM_BP_FAT	GO:0030335~positive regulation of cell migration	8	0.401808	0.0560053	CDH13, ADORA3, RRAS2, MMP9, F2RL1, THBS1, KDR, F2R	1003	31	8785	2.26032	1	0.568078	64.6953
GOTERM_BP_FAT	GO:0050930~induction of positive chemotaxis	3	0.150678	0.142898	IL8, IL16, SCG2	1003	6	8785	4.37936	1	0.817424	93.8305
Annotation Cluster 22	Enrichment Score: 2.8705630329990774
Category	Term	Count	%	PValue	Genes	List Total	Pop Hits	Pop Total	Fold Enrichment	Bonferroni	Benjamini	FDR
GOTERM_BP_FAT	GO:0009617~response to bacterium	24	1.20542	9.43125e-05	TNF, PGLYRP1, NFKBIA, BDKRB1, IL12RB2, DEFB5, STAT4, DEFB7, IFNG, LTF, IL1B, DEFB10, LBP, NOS2, IRAK1, LYZ2, TAP, STAB2, STAT1, BNBD-9-LIKE, P2RX7, CATHL2, KCNJ8, PTAFR, F2R	1003	88	8785	2.38874	0.252672	0.0076352	0.170236
GOTERM_BP_FAT	GO:0032496~response to lipopolysaccharide	11	0.552486	0.000484997	IL12RB2, IRAK1, P2RX7, STAT4, KCNJ8, IL1B, NFKBIA, BDKRB1, LBP, STAT1, PTAFR, F2R	1003	27	8785	3.56837	0.776431	0.0278691	0.872517
GOTERM_BP_FAT	GO:0002237~response to molecule of bacterial origin	11	0.552486	0.00358667	IL12RB2, IRAK1, P2RX7, STAT4, KCNJ8, IL1B, NFKBIA, BDKRB1, LBP, STAT1, PTAFR, F2R	1003	34	8785	2.8337	0.999985	0.110233	6.28468
GOTERM_BP_FAT	GO:0031663~lipopolysaccharide-mediated signaling pathway	5	0.25113	0.0200793	IRAK1, STAT4, NFKBIA, NOS3, LBP, STAT1	1003	10	8785	4.37936	1	0.328979	30.6787
Annotation Cluster 23	Enrichment Score: 2.5879222643583066
Category	Term	Count	%	PValue	Genes	List Total	Pop Hits	Pop Total	Fold Enrichment	Bonferroni	Benjamini	FDR
SP_PIR_KEYWORDS	metalloprotease	16	0.803616	0.000758208	CPA5, MMP9, MMP19, IDE, ANPEP, MMP3, MMP14, MMP13, MMP2, ECE2, CPE, ERAP2, ADAMTS1, ADAMTS2, ADAMTS5, ADAMTS4	1001	46	7349	2.55362	0.31718	0.0198799	1.08723
GOTERM_MF_FAT	GO:0008237~metallopeptidase activity	27	1.3561	0.00279921	AEBP1, MMP9, IDE, ANPEP, MMP3, MMP2, ECE2, ERAP2, ADAMTS12, DPEP2, ADAM28, CPA5, MMP19, PM20D1, MMP14, MMP13, LAP3, CPE, CPXM1, LOC789588, ADAMTS1, ADAM19, ADAM12, ADAMTS2, ADAMTS5, ADAMTS4, ADAM15	1013	135	9249	1.82606	0.926238	0.0889013	4.29302
SP_PIR_KEYWORDS	Protease	43	2.15972	0.00811726	LOC100125946, MMP9, LGMN, IDE, ANPEP, MMP3, MMP2, CTSL1, PSMB5, PIGK, CASP3, USP18, ECE2, CASP4, SERPINE2, USP12, LTF, ERAP2, TPSB1, CPA5, PLAT, CFB, MMP19, PM20D1, ELANE, LOC786126, MMP14, MMP13, LOC508858, PROC, LAP3, CTSK, CPE, ATG4A, F2, SPCS3, UCHL3, SPCS1, ADAMTS1, CTSB, PRSS23, ADAMTS2, ADAMTS5, ADAMTS4	1001	214	7349	1.47519	0.983421	0.131829	11.0831
Annotation Cluster 24	Enrichment Score: 2.558296842596314
Category	Term	Count	%	PValue	Genes	List Total	Pop Hits	Pop Total	Fold Enrichment	Bonferroni	Benjamini	FDR
SP_PIR_KEYWORDS	amino-acid biosynthesis	9	0.452034	0.00141075	BCAT1, ADI1, PYCR1, CTH, ASS1, PHGDH, ASNS, PSPH, ASL	1001	18	7349	3.67083	0.50841	0.0332495	2.01413
GOTERM_BP_FAT	GO:0016053~organic acid biosynthetic process	22	1.10497	0.00230469	BCAT1, FCER1A, PTGES2, ALDH18A1, TBXAS1, ASS1, SCD, EDN1, ACACA, FADS2, ASNS, PSPH, ASL, ADI1, PYCR1, CTH, DHFR, SDS, ALOX5AP, LOC789588, PHGDH, ELOVL6	1003	96	8785	2.00721	0.999195	0.0804077	4.08249
GOTERM_BP_FAT	GO:0046394~carboxylic acid biosynthetic process	22	1.10497	0.00230469	BCAT1, FCER1A, PTGES2, ALDH18A1, TBXAS1, ASS1, SCD, EDN1, ACACA, FADS2, ASNS, PSPH, ASL, ADI1, PYCR1, CTH, DHFR, SDS, ALOX5AP, LOC789588, PHGDH, ELOVL6	1003	96	8785	2.00721	0.999195	0.0804077	4.08249
GOTERM_BP_FAT	GO:0008652~cellular amino acid biosynthetic process	11	0.552486	0.00281401	BCAT1, ADI1, PYCR1, CTH, DHFR, ALDH18A1, ASS1, PHGDH, ASNS, PSPH, ASL	1003	33	8785	2.91957	0.999834	0.0893246	4.96318
GOTERM_BP_FAT	GO:0009309~amine biosynthetic process	14	0.703164	0.00766501	BCAT1, ALDH18A1, ASS1, SNCA, ASNS, PSPH, ASL, ADI1, PYCR1, CTH, DHFR, GATA3, PHGDH, ADC	1003	55	8785	2.22949	1	0.179635	12.9772
Annotation Cluster 25	Enrichment Score: 2.4649298751622677
Category	Term	Count	%	PValue	Genes	List Total	Pop Hits	Pop Total	Fold Enrichment	Bonferroni	Benjamini	FDR
GOTERM_BP_FAT	GO:0048584~positive regulation of response to stimulus	35	1.75791	7.18668e-08	C7, TNF, ADORA3, IL16, FAM175A, C3, F2RL1, KLRK1, NFKBIA, TLR3, CACNB3, LOC781004, ADA, SH2D1A, FCN2, CFH, IL1B, LBP, THBS1, SCG2, FCER1A, IRAK1, CRTAM, IL8, THEMIS, CFB, IGF2, IDO1, KDR, RNF8, CDH13, P2RX7, LAX1, LCK, HSPD1, APBB1	1003	114	8785	2.68908	0.0002219	2.77402e-05	0.000129825
GOTERM_BP_FAT	GO:0002684~positive regulation of immune system process	34	1.70768	8.6687e-06	C7, ADORA3, C3, F2RL1, KLRK1, NFKBIA, CACNB3, LOC781004, ADA, AQP3, SH2D1A, FCN2, IFNG, CFH, IL1B, CD4, INPP5D, LBP, THBS1, IL4, FCER1A, IRAK1, CRTAM, THEMIS, CD3E, CFB, CD276, IDO1, TRAT1, CD83, CD37, P2RX7, LAX1, LCK, HSPD1	1003	132	8785	2.25603	0.0264139	0.00133756	0.0156586
GOTERM_BP_FAT	GO:0050778~positive regulation of immune response	20	1.00452	0.000813233	FCER1A, IRAK1, C7, CRTAM, C3, CFB, THEMIS, KLRK1, NFKBIA, CACNB3, IDO1, LOC781004, ADA, SH2D1A, P2RX7, LAX1, FCN2, LCK, CFH, LBP, HSPD1	1003	77	8785	2.27499	0.918917	0.0410069	1.45893
GOTERM_BP_FAT	GO:0002253~activation of immune response	13	0.652938	0.00534115	C7, IRAK1, C3, THEMIS, CFB, KLRK1, NFKBIA, CACNB3, LOC781004, LAX1, FCN2, LCK, CFH, HSPD1	1003	47	8785	2.42263	1	0.143206	9.22125
GOTERM_BP_FAT	GO:0002757~immune response-activating signal transduction	8	0.401808	0.0281759	IRAK1, THEMIS, LAX1, LCK, KLRK1, NFKBIA, CACNB3, HSPD1	1003	27	8785	2.59518	1	0.403168	40.3274
GOTERM_BP_FAT	GO:0002764~immune response-regulating signal transduction	8	0.401808	0.040551	IRAK1, THEMIS, LAX1, LCK, KLRK1, NFKBIA, CACNB3, HSPD1	1003	29	8785	2.4162	1	0.480841	52.6597
GOTERM_BP_FAT	GO:0002429~immune response-activating cell surface receptor signaling pathway	5	0.25113	0.23737	THEMIS, LAX1, LCK, KLRK1, CACNB3	1003	22	8785	1.99062	1	0.925032	99.2518
GOTERM_BP_FAT	GO:0002768~immune response-regulating cell surface receptor signaling pathway	5	0.25113	0.263497	THEMIS, LAX1, LCK, KLRK1, CACNB3	1003	23	8785	1.90407	1	0.940849	99.6014
GOTERM_BP_FAT	GO:0050851~antigen receptor-mediated signaling pathway	4	0.200904	0.338234	THEMIS, LAX1, LCK, CACNB3	1003	18	8785	1.94638	1	0.971308	99.9423
Annotation Cluster 26	Enrichment Score: 2.4380265931342637
Category	Term	Count	%	PValue	Genes	List Total	Pop Hits	Pop Total	Fold Enrichment	Bonferroni	Benjamini	FDR
GOTERM_BP_FAT	GO:0006457~protein folding	33	1.65746	2.22658e-06	FKBP9, FKBP7, FKBP5, FKBP4, CALR, CANX, HSPH1, DNAJB11, HSPE1, ERO1L, HSPA9, AARS, CCT6A, TOR2A, PPIF, ERP44, CCT5, HSP90B1, LOC781339, CLGN, DNAJB9, PPIB, PPID, PPIC, TBCC, FKBP14, CALR3, DNAJB1, HSPD1, FKBP10, DNAJB4, FKBP11, FKBP2	1003	119	8785	2.42889	0.00685212	0.000491001	0.00402218
GOTERM_MF_FAT	GO:0003755~peptidyl-prolyl cis-trans isomerase activity	11	0.552486	0.000907703	PPIF, FKBP9, PPIB, FKBP5, FKBP4, PPID, PPIC, FKBP14, FKBP10, FKBP11, FKBP2	1013	30	9249	3.34778	0.570248	0.0394186	1.41147
GOTERM_MF_FAT	GO:0016859~cis-trans isomerase activity	11	0.552486	0.00121038	PPIF, FKBP9, PPIB, FKBP5, FKBP4, PPID, PPIC, FKBP14, FKBP10, FKBP11, FKBP2	1013	31	9249	3.23979	0.67578	0.0458463	1.87796
SP_PIR_KEYWORDS	Rotamase	11	0.552486	0.00195267	PPIF, FKBP9, PPIB, FKBP5, FKBP4, PPID, PPIC, FKBP14, FKBP10, FKBP11, FKBP2	1001	27	7349	2.99105	0.625871	0.043705	2.77774
INTERPRO	IPR001179:Peptidyl-prolyl cis-trans isomerase, FKBP-type	8	0.401808	0.00445807	FKBP9, FKBP7, FKBP5, FKBP4, FKBP14, FKBP10, FKBP11, FKBP2	1235	17	9171	3.49455	0.999554	0.295834	7.27231
SP_PIR_KEYWORDS	Isomerase	20	1.00452	0.0045848	P4HB, FKBP9, PTGES2, TBXAS1, PDIA3, FKBP5, HSD3B7, FKBP4, PDIA5, PDIA4, PPIF, GALM, PPIB, PPID, PPIC, FKBP14, GALE, FKBP10, FKBP11, FKBP2	1001	75	7349	1.95778	0.900883	0.0820474	6.40849
SP_PIR_KEYWORDS	Cyclosporin	4	0.200904	0.0202913	PPIF, PPIB, PPID, PPIC	1001	5	7349	5.87333	0.999967	0.243225	25.5809
UP_SEQ_FEATURE	domain:PPIase cyclophilin-type	4	0.200904	0.19951	PPIF, PPIB, PPID, PPIC	737	12	5635	2.54862	1	0.99988	97.7293
INTERPRO	IPR002130:Peptidyl-prolyl cis-trans isomerase, cyclophilin-type	4	0.200904	0.288992	PPIF, PPIB, PPID, PPIC	1235	14	9171	2.12169	1	0.997836	99.686
Annotation Cluster 27	Enrichment Score: 2.3603675239655093
Category	Term	Count	%	PValue	Genes	List Total	Pop Hits	Pop Total	Fold Enrichment	Bonferroni	Benjamini	FDR
INTERPRO	IPR016060:Complement control module	16	0.803616	1.82384e-05	PLAT, SELP, C7, IL2RA, MASP1, CFB, PAMR1, HP, LOC781004, LOC510860, SRPX, LOC790886, CFH, VCAN, SUSD4, SELE, FN1	1235	35	9171	3.3947	0.031007	0.00285935	0.0308156
INTERPRO	IPR000436:Sushi/SCR/CCP	14	0.703164	0.000186355	SELP, C7, IL2RA, MASP1, CFB, PAMR1, HP, LOC781004, LOC510860, SRPX, LOC790886, CFH, VCAN, SUSD4, SELE	1235	33	9171	3.15039	0.275204	0.0212291	0.314446
SMART	SM00032:CCP	14	0.703164	0.000452747	SELP, C7, IL2RA, MASP1, CFB, PAMR1, HP, LOC781004, LOC510860, SRPX, LOC790886, CFH, VCAN, SUSD4, SELE	644	33	4364	2.87484	0.122274	0.0257469	0.59957
SP_PIR_KEYWORDS	sushi	10	0.50226	0.00210213	SELP, C7, IL2RA, MASP1, CFB, PAMR1, CFH, HP, VCAN, SELE, LOC781004	1001	23	7349	3.19203	0.653019	0.0449782	2.98736
UP_SEQ_FEATURE	domain:Sushi 1	8	0.401808	0.00543641	SELP, C7, IL2RA, CFB, PAMR1, CFH, HP, SELE, LOC781004	737	18	5635	3.39816	0.999952	0.563533	8.85533
UP_SEQ_FEATURE	domain:Sushi 2	8	0.401808	0.00765477	SELP, C7, IL2RA, CFB, PAMR1, CFH, HP, SELE, LOC781004	737	19	5635	3.21931	0.999999	0.632743	12.2522
UP_SEQ_FEATURE	domain:EGF-like	6	0.301356	0.0915354	PLAT, SELP, C7, HYAL2, PAMR1, SELE	737	19	5635	2.41448	1	0.995053	80.4635
UP_SEQ_FEATURE	domain:Sushi 3	4	0.200904	0.164727	SELP, CFB, CFH, SELE, LOC781004	737	11	5635	2.78031	1	0.999599	95.3189
UP_SEQ_FEATURE	domain:Sushi 4	3	0.150678	0.281352	SELP, CFH, SELE, LOC781004	737	8	5635	2.8672	1	0.999986	99.6374
Annotation Cluster 28	Enrichment Score: 2.347096858979381
Category	Term	Count	%	PValue	Genes	List Total	Pop Hits	Pop Total	Fold Enrichment	Bonferroni	Benjamini	FDR
GOTERM_BP_FAT	GO:0050900~leukocyte migration	11	0.552486	0.000484997	SELP, TNF, IL8, IL16, CD34, IFNG, IL1B, PF4, SELPLG, SELE, SCG2	1003	27	8785	3.56837	0.776431	0.0278691	0.872517
GOTERM_BP_FAT	GO:0045123~cellular extravasation	4	0.200904	0.00541447	SELP, TNF, SELPLG, SELE	1003	4	8785	8.75872	1	0.143785	9.34205
GOTERM_BP_FAT	GO:0050901~leukocyte tethering or rolling	4	0.200904	0.00541447	SELP, TNF, SELPLG, SELE	1003	4	8785	8.75872	1	0.143785	9.34205
GOTERM_BP_FAT	GO:0007159~leukocyte adhesion	5	0.25113	0.0287582	SELP, TNF, ITGA5, SELPLG, SELE	1003	11	8785	3.98124	1	0.404205	40.9701
Annotation Cluster 29	Enrichment Score: 2.3221351573723332
Category	Term	Count	%	PValue	Genes	List Total	Pop Hits	Pop Total	Fold Enrichment	Bonferroni	Benjamini	FDR
GOTERM_BP_FAT	GO:0001775~cell activation	33	1.65746	6.94871e-06	ADORA3, CD8A, SNCA, KLRK1, PF4, ADA, BAK1, BCL11A, POLM, LBP, FAS, ENTPD1, DDOST, IMPDH1, RAB27A, EGR1, IL4, IL8, CD3D, THEMIS, CD3E, SWAP70, CD276, IFNAR1, VWF, P2RX7, CCND3, LAX1, LCK, F2, AICDA, HSPD1, F2R	1003	125	8785	2.3123	0.0212291	0.00119138	0.0125519
GOTERM_BP_FAT	GO:0045321~leukocyte activation	28	1.40633	4.69695e-05	ADORA3, CD8A, SNCA, KLRK1, ADA, BAK1, BCL11A, POLM, LBP, FAS, IMPDH1, DDOST, RAB27A, EGR1, IL4, IL8, CD3D, CD3E, THEMIS, SWAP70, CD276, IFNAR1, P2RX7, CCND3, LAX1, LCK, AICDA, HSPD1	1003	107	8785	2.292	0.135017	0.00482318	0.0848151
GOTERM_BP_FAT	GO:0046649~lymphocyte activation	24	1.20542	0.000113723	EGR1, IL4, CD3D, CD8A, CD3E, THEMIS, SWAP70, KLRK1, CD276, ADA, IFNAR1, BAK1, P2RX7, CCND3, LAX1, LCK, BCL11A, POLM, AICDA, HSPD1, FAS, IMPDH1, DDOST, RAB27A	1003	89	8785	2.3619	0.296154	0.00896461	0.205238
GOTERM_BP_FAT	GO:0002520~immune system development	28	1.40633	0.00152801	TWSG1, TNF, CD8A, SFXN1, ZBTB16, ADA, TIMP1, BAK1, BCL11A, POLM, TCEA1, FAS, LTA, EGR1, EPAS1, CD3D, CD3E, THEMIS, SWAP70, EPB42, HCLS1, KDR, PGM3, ID2, CXCL13, LCK, AICDA, HSPD1	1003	131	8785	1.87209	0.991104	0.0652338	2.72462
GOTERM_BP_FAT	GO:0048534~hemopoietic or lymphoid organ development	25	1.25565	0.00456944	TWSG1, TNF, CD8A, SFXN1, ZBTB16, ADA, TIMP1, BAK1, BCL11A, POLM, TCEA1, FAS, LTA, EGR1, CD3D, EPAS1, CD3E, THEMIS, EPB42, HCLS1, KDR, PGM3, ID2, CXCL13, LCK	1003	121	8785	1.80965	0.999999	0.128299	7.94047
GOTERM_BP_FAT	GO:0030097~hemopoiesis	23	1.1552	0.00464515	EGR1, TWSG1, TNF, CD3D, CD8A, EPAS1, CD3E, THEMIS, EPB42, HCLS1, SFXN1, ZBTB16, ADA, TIMP1, KDR, PGM3, BAK1, ID2, LCK, BCL11A, POLM, TCEA1, FAS	1003	108	8785	1.86528	0.999999	0.127969	8.06688
GOTERM_BP_FAT	GO:0042110~T cell activation	15	0.75339	0.00650593	EGR1, CD3D, CD8A, THEMIS, CD3E, CD276, IFNAR1, P2RX7, CCND3, BCL11A, LCK, HSPD1, FAS, DDOST, RAB27A	1003	60	8785	2.18968	1	0.163368	11.1225
GOTERM_BP_FAT	GO:0030098~lymphocyte differentiation	11	0.552486	0.0414257	EGR1, BAK1, CD3D, CD8A, CD3E, THEMIS, LCK, BCL11A, POLM, FAS, ADA	1003	48	8785	2.00721	1	0.486533	53.4333
GOTERM_BP_FAT	GO:0002521~leukocyte differentiation	12	0.602712	0.0819491	EGR1, BAK1, TNF, CD3D, CD8A, CD3E, THEMIS, LCK, BCL11A, POLM, FAS, ADA	1003	61	8785	1.72303	1	0.674873	78.6598
GOTERM_BP_FAT	GO:0030217~T cell differentiation	8	0.401808	0.0852209	EGR1, CD3D, CD8A, CD3E, THEMIS, LCK, BCL11A, FAS	1003	34	8785	2.06088	1	0.685163	79.9927
GOTERM_BP_FAT	GO:0045058~T cell selection	4	0.200904	0.149084	CD3D, CD3E, THEMIS, FAS	1003	12	8785	2.91957	1	0.828229	94.5871
GOTERM_BP_FAT	GO:0030183~B cell differentiation	4	0.200904	0.403385	BAK1, BCL11A, POLM, ADA	1003	20	8785	1.75174	1	0.984458	99.9911
Annotation Cluster 30	Enrichment Score: 2.207074383924137
Category	Term	Count	%	PValue	Genes	List Total	Pop Hits	Pop Total	Fold Enrichment	Bonferroni	Benjamini	FDR
GOTERM_BP_FAT	GO:0030193~regulation of blood coagulation	9	0.452034	0.000262828	SELP, CAV1, APOE, F2, F2RL1, THBS1, ANXA2, PROC, F2R	1003	17	8785	4.63697	0.555907	0.0164293	0.473728
GOTERM_BP_FAT	GO:0050818~regulation of coagulation	10	0.50226	0.000393473	SELP, CAV1, APOE, F2, F2RL1, VKORC1, THBS1, ANXA2, PROC, F2R	1003	22	8785	3.98124	0.703374	0.0235474	0.708417
GOTERM_BP_FAT	GO:0030195~negative regulation of blood coagulation	4	0.200904	0.0963131	APOE, F2, ANXA2, PROC	1003	10	8785	3.50349	1	0.716631	83.9499
GOTERM_BP_FAT	GO:0050819~negative regulation of coagulation	4	0.200904	0.149084	APOE, F2, ANXA2, PROC	1003	12	8785	2.91957	1	0.828229	94.5871
Annotation Cluster 31	Enrichment Score: 2.097253639982598
Category	Term	Count	%	PValue	Genes	List Total	Pop Hits	Pop Total	Fold Enrichment	Bonferroni	Benjamini	FDR
GOTERM_BP_FAT	GO:0032268~regulation of cellular protein metabolic process	36	1.80814	0.000185463	SRP14, A2M, CAV1, TNF, GCLC, AURKAIP1, EDN1, SNCA, EIF5A, NFKBIA, ITGB3, TLR6, BAK1, APOA1, APOE, IFNG, IL1B, CD4, THBS1, IL4, FCER1A, TNXB, ACO1, CD3E, PAIP2, SOCS3, HCLS1, TRNAU1AP, P2RX7, TSC1, CCND3, CCND2, F2, PDGFRB, EIF2AK3, SERP1	1003	165	8785	1.91099	0.436034	0.0126474	0.334503
GOTERM_BP_FAT	GO:0051345~positive regulation of hydrolase activity	15	0.75339	0.000524452	GNA15, PTGER3, TNF, RALBP1, EDN1, BAK1, APOA1, TSC1, NMUR2, LCK, IFNG, HSPD1, EIF2AK3, SELE, F2R	1003	47	8785	2.79534	0.802088	0.0290238	0.943179
GOTERM_BP_FAT	GO:0051247~positive regulation of protein metabolic process	20	1.00452	0.00096267	FCER1A, IL4, GCLC, TNF, AURKAIP1, CD3E, HCLS1, GJA1, NFKBIA, EIF5A, P2RX7, CCND3, APOE, CCND2, IFNG, F2, IL1B, CD4, THBS1, SERP1	1003	78	8785	2.24583	0.94891	0.0461119	1.72483
GOTERM_BP_FAT	GO:0032270~positive regulation of cellular protein metabolic process	19	0.954294	0.00111526	FCER1A, IL4, GCLC, TNF, AURKAIP1, CD3E, HCLS1, NFKBIA, EIF5A, P2RX7, CCND3, APOE, CCND2, IFNG, F2, IL1B, CD4, THBS1, SERP1	1003	73	8785	2.27967	0.968122	0.0516323	1.99563
GOTERM_BP_FAT	GO:0043085~positive regulation of catalytic activity	31	1.55701	0.00127756	GNA15, CAV1, TNF, EDN1, TLR6, BAK1, ADRB3, APOA1, APOE, NMUR2, IFNG, IL1B, NOS3, CALCRL, THBS1, FCER1A, IRAK1, PTGER3, RALBP1, TAB1, CISH, P2RX7, TSC1, CCND3, CCND2, LCK, HSPD1, SELE, EIF2AK3, VLDLR, F2R	1003	149	8785	1.82228	0.9807	0.0580591	2.2829
GOTERM_BP_FAT	GO:0001932~regulation of protein amino acid phosphorylation	19	0.954294	0.00132009	FCER1A, IL4, CAV1, TNXB, TNF, SOCS3, CD3E, HCLS1, EDN1, TLR6, BAK1, P2RX7, APOA1, CCND3, CCND2, IFNG, F2, PDGFRB, CD4	1003	74	8785	2.24886	0.983078	0.0590664	2.35804
GOTERM_BP_FAT	GO:0044093~positive regulation of molecular function	34	1.70768	0.00214648	GNA15, CAV1, TNF, MTDH, EDN1, TLR3, TLR6, BAK1, ADRB3, APOA1, APOE, NMUR2, IFNG, IL1B, NOS3, CALCRL, THBS1, IL4, FCER1A, IRAK1, PTGER3, RALBP1, TAB1, CISH, P2RX7, TSC1, CCND3, CCND2, LCK, HSPD1, SELE, EIF2AK3, VLDLR, F2R	1003	174	8785	1.71147	0.998687	0.0777326	3.80734
GOTERM_BP_FAT	GO:0031399~regulation of protein modification process	22	1.10497	0.00230469	FCER1A, IL4, CAV1, TNF, TNXB, GCLC, SOCS3, CD3E, HCLS1, SNCA, EDN1, TLR6, BAK1, P2RX7, APOA1, CCND3, TSC1, CCND2, IFNG, F2, PDGFRB, CD4	1003	96	8785	2.00721	0.999195	0.0804077	4.08249
GOTERM_BP_FAT	GO:0042325~regulation of phosphorylation	33	1.65746	0.0040802	CAV1, TNF, EDN1, TLR6, TNFRSF4, TRIB2, BAK1, CASP3, APOA1, APOE, IFNG, IL1B, CD4, THBS1, IL4, FCER1A, IRAK1, TNXB, CD3E, SOCS3, HCLS1, TAB1, PKIA, CISH, P2RX7, TSC1, CCND3, LAX1, CCND2, F2, PDGFRB, GADD45A, VLDLR	1003	174	8785	1.66114	0.999997	0.119733	7.11969
GOTERM_BP_FAT	GO:0045859~regulation of protein kinase activity	23	1.1552	0.00651464	FCER1A, IRAK1, CAV1, TNF, TNXB, EDN1, TLR6, TAB1, PKIA, TNFRSF4, CISH, TRIB2, CASP3, P2RX7, CCND3, TSC1, APOE, LAX1, CCND2, IL1B, THBS1, GADD45A, VLDLR	1003	111	8785	1.81487	1	0.162257	11.1366
GOTERM_BP_FAT	GO:0019220~regulation of phosphate metabolic process	33	1.65746	0.00810015	CAV1, TNF, EDN1, TLR6, TNFRSF4, TRIB2, BAK1, CASP3, APOA1, APOE, IFNG, IL1B, CD4, THBS1, IL4, FCER1A, IRAK1, TNXB, CD3E, SOCS3, HCLS1, TAB1, PKIA, CISH, P2RX7, TSC1, CCND3, LAX1, CCND2, F2, PDGFRB, GADD45A, VLDLR	1003	182	8785	1.58812	1	0.183347	13.6639
GOTERM_BP_FAT	GO:0051174~regulation of phosphorus metabolic process	33	1.65746	0.00810015	CAV1, TNF, EDN1, TLR6, TNFRSF4, TRIB2, BAK1, CASP3, APOA1, APOE, IFNG, IL1B, CD4, THBS1, IL4, FCER1A, IRAK1, TNXB, CD3E, SOCS3, HCLS1, TAB1, PKIA, CISH, P2RX7, TSC1, CCND3, LAX1, CCND2, F2, PDGFRB, GADD45A, VLDLR	1003	182	8785	1.58812	1	0.183347	13.6639
GOTERM_BP_FAT	GO:0051338~regulation of transferase activity	24	1.20542	0.00918969	FCER1A, IRAK1, CAV1, TNF, TNXB, EDN1, TLR6, TAB1, PKIA, TNFRSF4, CISH, TRIB2, CASP3, P2RX7, APOA1, CCND3, TSC1, APOE, LAX1, CCND2, IL1B, THBS1, GADD45A, VLDLR	1003	121	8785	1.73727	1	0.199666	15.3611
GOTERM_BP_FAT	GO:0045937~positive regulation of phosphate metabolic process	12	0.602712	0.0105657	FCER1A, IL4, P2RX7, TNF, CCND3, CCND2, CD3E, HCLS1, F2, IFNG, CD4, THBS1	1003	45	8785	2.33566	1	0.2215	17.4596
GOTERM_BP_FAT	GO:0010562~positive regulation of phosphorus metabolic process	12	0.602712	0.0105657	FCER1A, IL4, P2RX7, TNF, CCND3, CCND2, CD3E, HCLS1, F2, IFNG, CD4, THBS1	1003	45	8785	2.33566	1	0.2215	17.4596
GOTERM_BP_FAT	GO:0042327~positive regulation of phosphorylation	12	0.602712	0.0105657	FCER1A, IL4, P2RX7, TNF, CCND3, CCND2, CD3E, HCLS1, F2, IFNG, CD4, THBS1	1003	45	8785	2.33566	1	0.2215	17.4596
GOTERM_BP_FAT	GO:0043549~regulation of kinase activity	23	1.1552	0.012106	FCER1A, IRAK1, CAV1, TNF, TNXB, EDN1, TLR6, TAB1, PKIA, TNFRSF4, CISH, TRIB2, CASP3, P2RX7, CCND3, TSC1, APOE, LAX1, CCND2, IL1B, THBS1, GADD45A, VLDLR	1003	117	8785	1.7218	1	0.24316	19.7502
GOTERM_BP_FAT	GO:0001934~positive regulation of protein amino acid phosphorylation	11	0.552486	0.0146956	FCER1A, IL4, P2RX7, TNF, CCND3, CCND2, CD3E, HCLS1, F2, IFNG, CD4	1003	41	8785	2.3499	1	0.273631	23.4665
GOTERM_BP_FAT	GO:0043405~regulation of MAP kinase activity	12	0.602712	0.0171432	FCER1A, P2RX7, CAV1, TNF, TNXB, APOE, LAX1, EDN1, IL1B, TLR6, THBS1, TRIB2	1003	48	8785	2.18968	1	0.293008	26.8291
GOTERM_BP_FAT	GO:0051336~regulation of hydrolase activity	25	1.25565	0.0264562	CAV1, ARFGAP3, GNA15, TNF, EDN1, ASAP2, TBC1D15, BAK1, APOA1, NMUR2, IFNG, NOS3, ANGPTL4, PTGER3, RALBP1, CST3, USP6NL, TBC1D24, TSC1, LCK, HSPD1, SELE, EIF2AK3, IFI6, F2R	1003	140	8785	1.56406	1	0.38911	38.3908
GOTERM_BP_FAT	GO:0050730~regulation of peptidyl-tyrosine phosphorylation	8	0.401808	0.0560053	FCER1A, IL4, CAV1, CD3E, HCLS1, IFNG, PDGFRB, CD4	1003	31	8785	2.26032	1	0.568078	64.6953
GOTERM_BP_FAT	GO:0031401~positive regulation of protein modification process	11	0.552486	0.0594175	FCER1A, IL4, P2RX7, TNF, CCND3, CCND2, CD3E, HCLS1, F2, IFNG, CD4	1003	51	8785	1.88914	1	0.585136	66.9309
GOTERM_BP_FAT	GO:0051347~positive regulation of transferase activity	14	0.703164	0.0804822	FCER1A, IRAK1, TNF, EDN1, TAB1, TLR6, CISH, P2RX7, APOA1, CCND3, CCND2, IL1B, THBS1, VLDLR	1003	75	8785	1.63496	1	0.67268	78.0353
GOTERM_BP_FAT	GO:0045860~positive regulation of protein kinase activity	13	0.652938	0.0814358	FCER1A, IRAK1, TNF, EDN1, TAB1, TLR6, CISH, P2RX7, CCND3, CCND2, IL1B, THBS1, VLDLR	1003	68	8785	1.67446	1	0.674034	78.4432
GOTERM_BP_FAT	GO:0050731~positive regulation of peptidyl-tyrosine phosphorylation	6	0.301356	0.0973166	FCER1A, IL4, CD3E, HCLS1, IFNG, CD4	1003	22	8785	2.38874	1	0.717659	84.2688
GOTERM_BP_FAT	GO:0033674~positive regulation of kinase activity	13	0.652938	0.104966	FCER1A, IRAK1, TNF, EDN1, TAB1, TLR6, CISH, P2RX7, CCND3, CCND2, IL1B, THBS1, VLDLR	1003	71	8785	1.60371	1	0.734805	86.5106
Annotation Cluster 32	Enrichment Score: 2.0714866219965473
Category	Term	Count	%	PValue	Genes	List Total	Pop Hits	Pop Total	Fold Enrichment	Bonferroni	Benjamini	FDR
GOTERM_MF_FAT	GO:0008233~peptidase activity	69	3.4656	0.000691748	AEBP1, HM13, MASP1, LGMN, MMP9, IDE, HP, ANPEP, MMP3, MMP2, PIGK, CASP3, USP18, CASP4, LOC515736, CASP9, SERPINE2, HTRA1, FAP, USP12, KLK12, LTF, ERAP2, KLK10, TPSB1, PRSS35, DPEP2, ELANE, MMP19, LOC786126, MMP14, MMP13, LOC508858, PROC, CTSW, LAP3, GZMM, CTSK, CPE, BACE2, ATG4A, CPXM1, F2, LOC789588, UCHL3, ADAMTS1, CTSB, ADAM19, ADAM12, ADAMTS2, ADAMTS5, ADAM15, ADAMTS4, LOC100125946, PAMR1, CT…	1013	424	9249	1.48583	0.474575	0.0371482	1.07736
SP_PIR_KEYWORDS	zymogen	23	1.1552	0.000892535	CPA5, PLAT, CFB, LGMN, MMP9, F13A1, LOC786126, MMP14, MMP13, MMP2, LOC508858, PROC, GLB1, PSMB5, CASP3, CTSK, CASP4, CPE, F2, CTSB, TPSB1, ADAMTS2, PROS1, ADAMTS4	1001	81	7349	2.08467	0.361827	0.022207	1.2787
GOTERM_MF_FAT	GO:0070011~peptidase activity, acting on L-amino acid peptides	65	3.26469	0.00197507	AEBP1, HM13, MASP1, MMP9, LGMN, IDE, HP, ANPEP, MMP3, MMP2, PIGK, CASP3, USP18, CASP4, LOC515736, CASP9, HTRA1, FAP, USP12, KLK12, LTF, ERAP2, KLK10, TPSB1, PRSS35, DPEP2, ELANE, MMP19, LOC786126, MMP14, MMP13, LOC508858, PROC, CTSW, LAP3, GZMM, CTSK, CPE, BACE2, ATG4A, CPXM1, F2, LOC789588, UCHL3, ADAMTS1, CTSB, ADAM19, ADAM12, ADAMTS2, ADAMTS5, ADAM15, ADAMTS4, LOC100125946, PAMR1, CTSL1, PSMB5…	1013	410	9249	1.44749	0.840966	0.0658307	3.04735
SP_PIR_KEYWORDS	Protease	43	2.15972	0.00811726	LOC100125946, MMP9, LGMN, IDE, ANPEP, MMP3, MMP2, CTSL1, PSMB5, PIGK, CASP3, USP18, ECE2, CASP4, SERPINE2, USP12, LTF, ERAP2, TPSB1, CPA5, PLAT, CFB, MMP19, PM20D1, ELANE, LOC786126, MMP14, MMP13, LOC508858, PROC, LAP3, CTSK, CPE, ATG4A, F2, SPCS3, UCHL3, SPCS1, ADAMTS1, CTSB, PRSS23, ADAMTS2, ADAMTS5, ADAMTS4	1001	214	7349	1.47519	0.983421	0.131829	11.0831
GOTERM_MF_FAT	GO:0004175~endopeptidase activity	48	2.41085	0.0138738	HM13, MASP1, LGMN, MMP9, IDE, HP, MMP3, MMP2, PIGK, CASP3, LOC515736, CASP4, CASP9, HTRA1, FAP, KLK12, USP12, KLK10, TPSB1, PRSS35, ELANE, MMP19, LOC786126, MMP14, MMP13, LOC508858, PROC, GZMM, CTSK, BACE2, F2, ADAMTS1, ADAM19, CTSB, ADAM12, ADAMTS2, ADAMTS5, ADAMTS4, ADAM15, LOC100125946, PAMR1, CTSL1, PSMB5, ECE2, ADAMTS12, PLAT, ADAM28, CFB, PRSS23	1013	312	9249	1.40466	0.999998	0.28334	19.6434
GOTERM_BP_FAT	GO:0006508~proteolysis	86	4.31944	0.0316119	AEBP1, MASP1, LGMN, MMP9, IDE, HP, ANPEP, MMP3, LOC781004, MMP2, PIGK, CASP3, USP18, LOC515736, CASP4, ISG15, CASP9, HTRA1, FAP, USP12, CFH, KLK12, KLK10, ERAP2, TPSB1, PRSS35, DPEP2, SOCS3, ELANE, MMP19, HERC5, LOC786126, MMP14, MMP13, LOC508858, PROC, CTSW, GZMM, LAP3, CTSK, CPE, BACE2, ATG4A, F2, CPXM1, LOC789588, UCHL3, ADAMTS1, CTSB, ADAM19, TGFB1I1, ADAM12, USP25, ADAMTS2, UBE2S, ADAMTS5, A…	1003	615	8785	1.2248	1	0.427228	44.0258
SP_PIR_KEYWORDS	hydrolase	90	4.52034	0.727747	IMPAD1, BTD, LGMN, MMP9, IDE, ARSK, BPHL, ANPEP, ATP10D, MMP3, PSPH, MMP2, FAH, GLB1, PTER, PIGK, CASP3, CASP4, ATP2B4, NT5C2, USP12, ABHD11, DNAJC6, LTF, ERAP2, PLA2G2D1, PLCB1, TPSB1, BPNT1, DDAH1, HYAL2, FAM108C1, PTPRG, ELANE, MMP19, LOC786126, FBP2, DIS3L, MMP14, MMP13, LOC508858, PROC, LAP3, CTSK, CPE, ATG4A, F2, UCHL3, AICDA, ADAMTS1, CTSB, ADAMTS2, ADAMTS5, ADAMTS4, ALPL, ACHE, LOC1001259…	1001	689	7349	0.958997	1	0.992704	100
Annotation Cluster 33	Enrichment Score: 2.0371582267707526
Category	Term	Count	%	PValue	Genes	List Total	Pop Hits	Pop Total	Fold Enrichment	Bonferroni	Benjamini	FDR
KEGG_PATHWAY	bta04940:Type I diabetes mellitus	16	0.803616	3.72608e-05	PRF1, TNF, LOC786695, LOC786126, FASLG, LOC508858, BOLA-DQA1, CD86, CPE, IFNG, IL1B, JSP.1, HSPD1, FAS, LOC509513, LTA, BOLA-DYB	624	39	4940	3.24786	0.00679567	0.00113583	0.0460129
KEGG_PATHWAY	bta05332:Graft-versus-host disease	13	0.652938	0.000144916	PRF1, TNF, LOC786695, LOC786126, FASLG, LOC508858, BOLA-DQA1, CD86, IFNG, IL1B, JSP.1, FAS, LOC509513, BOLA-DYB	624	30	4940	3.43056	0.0261729	0.00378162	0.178845
KEGG_PATHWAY	bta05330:Allograft rejection	13	0.652938	0.000569098	IL4, PRF1, TNF, LOC786695, LOC786126, FASLG, LOC508858, BOLA-DQA1, CD86, IFNG, JSP.1, FAS, LOC509513, BOLA-DYB	624	34	4940	3.02696	0.098932	0.0115082	0.700654
KEGG_PATHWAY	bta05320:Autoimmune thyroid disease	11	0.552486	0.0376864	IL4, BOLA-DQA1, PRF1, CD86, LOC786695, LOC786126, FASLG, JSP.1, FAS, LOC509513, LOC508858, BOLA-DYB	624	43	4940	2.02519	0.999115	0.296366	37.7792
KEGG_PATHWAY	bta05310:Asthma	7	0.351582	0.072317	FCER1A, IL4, BOLA-DQA1, TNF, LOC786695, LOC509513, BOLA-DYB	624	24	4940	2.30903	0.999999	0.410419	60.4327
KEGG_PATHWAY	bta05416:Viral myocarditis	13	0.652938	0.075587	PRF1, ITGAL, CAV1, LOC786695, CYCS, BOLA-DQA1, CASP3, CD86, CASP9, JSP.1, LOC509513, MYH10, BOLA-DYB	624	61	4940	1.68716	0.999999	0.412987	62.1213
KEGG_PATHWAY	bta04672:Intestinal immune network for IgA production	10	0.50226	0.129857	IL4, BOLA-DQA1, CD86, LOC786695, ICOS, TNFRSF13B, CCR10, AICDA, LOC509513, BOLA-DYB	624	47	4940	1.6844	1	0.527007	82.0587
KEGG_PATHWAY	bta05322:Systemic lupus erythematosus	15	0.75339	0.613536	C7, TNF, LOC786695, C3, LOC522960, ELANE, C1R, TRIM21, BOLA-DQA1, CD86, H2AFV, IFNG, LOC788250, LOC509513, BOLA-DYB	624	116	4940	1.02371	1	0.916711	99.9992
Annotation Cluster 34	Enrichment Score: 2.017824653522755
Category	Term	Count	%	PValue	Genes	List Total	Pop Hits	Pop Total	Fold Enrichment	Bonferroni	Benjamini	FDR
GOTERM_BP_FAT	GO:0030323~respiratory tube development	13	0.652938	0.00640045	RBP4, EPAS1, PDPN, TAB1, MMP14, ADA, KDR, CTGF, PDGFRA, HOPX, NOS3, LOX, ADAMTS2	1003	48	8785	2.37215	1	0.162251	10.9519
GOTERM_BP_FAT	GO:0030324~lung development	13	0.652938	0.00640045	RBP4, EPAS1, PDPN, TAB1, MMP14, ADA, KDR, CTGF, PDGFRA, HOPX, NOS3, LOX, ADAMTS2	1003	48	8785	2.37215	1	0.162251	10.9519
GOTERM_BP_FAT	GO:0060541~respiratory system development	13	0.652938	0.00761896	RBP4, EPAS1, PDPN, TAB1, MMP14, ADA, KDR, CTGF, PDGFRA, HOPX, NOS3, LOX, ADAMTS2	1003	49	8785	2.32374	1	0.180012	12.9042
GOTERM_BP_FAT	GO:0035295~tube development	19	0.954294	0.0271885	RBP4, EPAS1, PDPN, EDN1, GJA1, MMP14, TAB1, GREM1, ADA, FZD6, KDR, HHEX, TSC1, CTGF, PDGFRA, HOPX, NOS3, LOX, ADAMTS2	1003	98	8785	1.69812	1	0.395692	39.2226
Annotation Cluster 35	Enrichment Score: 1.993841894483358
Category	Term	Count	%	PValue	Genes	List Total	Pop Hits	Pop Total	Fold Enrichment	Bonferroni	Benjamini	FDR
GOTERM_BP_FAT	GO:0002526~acute inflammatory response	13	0.652938	0.00240602	C7, ADORA3, PTGER3, C3, CFB, SAA3, LOC781004, CD163, FCN2, F2, CFH, IL1B, LBP, FN1	1003	43	8785	2.64799	0.999412	0.0828617	4.25832
GOTERM_BP_FAT	GO:0006953~acute-phase response	7	0.351582	0.00632385	PTGER3, F2, SAA3, IL1B, LBP, CD163, FN1	1003	16	8785	3.83194	1	0.16179	10.8278
SP_PIR_KEYWORDS	acute phase	5	0.25113	0.0685793	C3, F2, SAA3, CD163, FN1	1001	12	7349	3.05902	1	0.517749	64.0818
Annotation Cluster 36	Enrichment Score: 1.9504358627373277
Category	Term	Count	%	PValue	Genes	List Total	Pop Hits	Pop Total	Fold Enrichment	Bonferroni	Benjamini	FDR
GOTERM_BP_FAT	GO:0030199~collagen fibril organization	10	0.50226	3.70711e-06	TNXB, COL3A1, COL1A2, COL1A1, LOX, COL11A2, SERPINH1, ADAMTS2, ANXA2, DPT	1003	14	8785	6.25623	0.0113823	0.000715217	0.00669657
SP_PIR_KEYWORDS	collagen	18	0.904068	4.24774e-05	COL18A1, CTHRC1, COL4A2, COL4A1, COL3A1, COLEC12, PCOLCE2, COL17A1, C1QTNF5, C1QTNF6, C1QTNF1, FCN2, COL6A2, COL1A2, COL12A1, COL1A1, COL11A2, COL8A1	1001	45	7349	2.93666	0.0211399	0.00194053	0.0612032
GOTERM_CC_FAT	GO:0005581~collagen	9	0.452034	0.000669335	COL4A2, COL4A1, TNXB, LUM, COL3A1, COL1A2, COL1A1, LOX, COL11A2	850	18	6966	4.09765	0.222044	0.0104073	0.920864
GOTERM_MF_FAT	GO:0005201~extracellular matrix structural constituent	9	0.452034	0.00110131	COL18A1, COL4A2, COL4A1, FBN1, COL3A1, ELN, COL1A2, COL1A1, COL11A2	1013	21	9249	3.91299	0.641124	0.0455126	1.71009
GOTERM_CC_FAT	GO:0005583~fibrillar collagen	5	0.25113	0.00268271	TNXB, LUM, COL3A1, COL1A2, COL1A1	850	6	6966	6.82941	0.634821	0.0380039	3.64364
SP_PIR_KEYWORDS	hydroxylation	10	0.50226	0.0232837	COL17A1, COL4A2, COL4A1, COL3A1, ELN, COL1A2, COL1A1, COL11A2, PROS1, PROC	1001	32	7349	2.29427	0.999993	0.262029	28.7906
INTERPRO	IPR000885:Fibrillar collagen, C-terminal	4	0.200904	0.035449	COL3A1, COL1A2, COL1A1, COL11A2	1235	6	9171	4.95061	1	0.765331	45.6601
SMART	SM00038:COLFI	4	0.200904	0.0450466	COL3A1, COL1A2, COL1A1, COL11A2	644	6	4364	4.5176	0.999998	0.563806	45.779
SP_PIR_KEYWORDS	triple helix	4	0.200904	0.0575442	COL4A1, COL3A1, COL1A2, COL1A1	1001	7	7349	4.19523	1	0.462626	57.4366
SP_PIR_KEYWORDS	trimer	4	0.200904	0.0575442	COL4A1, COL3A1, COL1A2, COL1A1	1001	7	7349	4.19523	1	0.462626	57.4366
GOTERM_BP_FAT	GO:0043588~skin development	5	0.25113	0.0662299	AARS, COL3A1, COL1A2, COL1A1, ADAMTS2	1003	14	8785	3.12812	1	0.619487	71.0003
UP_SEQ_FEATURE	region of interest:Triple-helical region	4	0.200904	0.0749831	COL17A1, COL3A1, COL1A1, COL11A2	737	8	5635	3.82293	1	0.993782	73.44
UP_SEQ_FEATURE	propeptide:C-terminal propeptide	3	0.150678	0.085341	COL1A2, COL1A1, COL11A2	737	4	5635	5.7344	1	0.993826	78.0697
UP_SEQ_FEATURE	domain:Fibrillar collagen NC1	3	0.150678	0.085341	COL1A2, COL1A1, COL11A2	737	4	5635	5.7344	1	0.993826	78.0697
PIR_SUPERFAMILY	PIRSF002255:collagen alpha 1(I) chain	3	0.150678	0.110935	COL3A1, COL1A2, COL1A1	589	4	3890	4.95331	1	0.999989	82.2682
SP_PIR_KEYWORDS	hydroxyproline	3	0.150678	0.403632	COL3A1, COL1A2, COL11A2	1001	10	7349	2.2025	1	0.927651	99.9418
Annotation Cluster 37	Enrichment Score: 1.941330667753145
Category	Term	Count	%	PValue	Genes	List Total	Pop Hits	Pop Total	Fold Enrichment	Bonferroni	Benjamini	FDR
GOTERM_BP_FAT	GO:0001501~skeletal system development	26	1.30588	0.0019213	TWSG1, RBP4, SCHIP1, MMP9, EDN1, PRRX1, ZBTB16, MMP2, CTGF, PTN, COL11A2, SPP1, COL13A1, HSPG2, IGF2, SMAD1, MMP13, P2RX7, CLEC3B, PDGFRA, COL1A2, PDGFRB, COL1A1, BMPR1B, EIF2AK3, SERP1	1003	120	8785	1.89772	0.997365	0.0724172	3.41446
GOTERM_BP_FAT	GO:0048705~skeletal system morphogenesis	12	0.602712	0.0229713	SCHIP1, P2RX7, COL13A1, CTGF, PRRX1, HSPG2, PDGFRA, PDGFRB, COL1A1, COL11A2, BMPR1B, MMP2	1003	50	8785	2.10209	1	0.35788	34.2828
GOTERM_BP_FAT	GO:0051216~cartilage development	9	0.452034	0.0339803	CTGF, EDN1, PRRX1, HSPG2, COL1A1, COL11A2, BMPR1B, EIF2AK3, MMP13	1003	34	8785	2.31849	1	0.443767	46.4479
Annotation Cluster 38	Enrichment Score: 1.9169485367401606
Category	Term	Count	%	PValue	Genes	List Total	Pop Hits	Pop Total	Fold Enrichment	Bonferroni	Benjamini	FDR
GOTERM_BP_FAT	GO:0048871~multicellular organismal homeostasis	12	0.602712	0.00408779	ADRB3, RBP4, P2RX7, PTGER3, EPAS1, ACACA, PDGFRB, IL1B, COL11A2, KDR, F2R, CD7	1003	40	8785	2.62762	0.999997	0.118817	7.13246
GOTERM_BP_FAT	GO:0001894~tissue homeostasis	9	0.452034	0.0164619	RBP4, P2RX7, EPAS1, ACACA, PDGFRB, COL11A2, KDR, F2R, CD7	1003	30	8785	2.62762	1	0.287841	25.9074
GOTERM_BP_FAT	GO:0060249~anatomical structure homeostasis	12	0.602712	0.0263746	MTM1, RBP4, P2RX7, EPAS1, ACACA, PDGFRB, COL11A2, PARP1, TERT, KDR, F2R, CD7	1003	51	8785	2.06088	1	0.389965	38.2974
Annotation Cluster 39	Enrichment Score: 1.9069972318336075
Category	Term	Count	%	PValue	Genes	List Total	Pop Hits	Pop Total	Fold Enrichment	Bonferroni	Benjamini	FDR
GOTERM_BP_FAT	GO:0042592~homeostatic process	65	3.26469	9.40111e-05	SLC9A9, GNA15, PTGES2, PDIA3, ATOX1, SNCA, EDN1, PRDX4, PDIA5, PDIA4, BAK1, CASP3, APP, APOA1, APOE, NMUR2, IFNG, IL1B, LTF, FAS, COL11A2, TERT, MT3, KCNMA1, PTGER3, ACO1, CCDC47, LOC518911, LOC788801, TXNDC5, TXN, LCK, F2, PDGFRB, RBP4, TF, CAV1, GCLC, PRND, SFXN1, CLDN11, TIMP1, MTM1, ADRB3, TCEA1, CD7, P4HB, EPAS1, EPB42, HCLS1, ACACA, SMAD1, SELS, KDR, ERP44, KCNN4, TXNDC11, P2RX7, ID2, ATP2A…	1003	353	8785	1.6128	0.251976	0.00781578	0.169692
GOTERM_BP_FAT	GO:0055080~cation homeostasis	25	1.25565	0.00228732	SLC9A9, TF, CAV1, GNA15, ATOX1, EDN1, PRND, BAK1, APP, APOE, NMUR2, LTF, MT3, KCNMA1, PTGER3, ACO1, CCDC47, LOC518911, KDR, P2RX7, ATP2A2, LOC788801, F2, LCK, F2R	1003	115	8785	1.90407	0.999151	0.0807367	4.05232
GOTERM_BP_FAT	GO:0019725~cellular homeostasis	39	1.95881	0.00379222	TF, GNA15, CAV1, PTGES2, GCLC, PDIA3, ATOX1, PRND, EDN1, SNCA, PRDX4, PDIA5, PDIA4, CLDN11, BAK1, MTM1, APP, APOE, NMUR2, LTF, MT3, KCNMA1, P4HB, PTGER3, ACO1, SELS, ERP44, KCNN4, TXNDC11, P2RX7, ATP2A2, TSC1, LOC788801, TXNDC5, LCK, TXN, F2, IFI6, F2R	1003	215	8785	1.58879	0.999992	0.115042	6.63331
GOTERM_BP_FAT	GO:0055066~di-, tri-valent inorganic cation homeostasis	21	1.05475	0.00460875	TF, GNA15, CAV1, PTGER3, ATOX1, ACO1, EDN1, PRND, CCDC47, KDR, BAK1, APP, P2RX7, ATP2A2, APOE, LOC788801, NMUR2, LCK, F2, LTF, F2R	1003	95	8785	1.93614	0.999999	0.12817	8.00612
GOTERM_BP_FAT	GO:0030003~cellular cation homeostasis	21	1.05475	0.00743894	KCNMA1, TF, GNA15, CAV1, PTGER3, ATOX1, ACO1, PRND, EDN1, BAK1, APP, P2RX7, ATP2A2, APOE, LOC788801, NMUR2, LCK, F2, LTF, MT3, F2R	1003	99	8785	1.85791	1	0.178868	12.6183
GOTERM_BP_FAT	GO:0055065~metal ion homeostasis	16	0.803616	0.00852665	KCNMA1, GNA15, CAV1, PTGER3, EDN1, CCDC47, KDR, BAK1, P2RX7, ATP2A2, APOE, NMUR2, F2, LCK, MT3, F2R	1003	68	8785	2.06088	1	0.189308	14.3321
GOTERM_BP_FAT	GO:0030005~cellular di-, tri-valent inorganic cation homeostasis	19	0.954294	0.0133454	TF, GNA15, CAV1, PTGER3, ATOX1, ACO1, PRND, EDN1, BAK1, APP, P2RX7, ATP2A2, APOE, LOC788801, NMUR2, LCK, F2, LTF, F2R	1003	91	8785	1.82874	1	0.258052	21.5497
GOTERM_BP_FAT	GO:0050801~ion homeostasis	30	1.50678	0.0144736	SLC9A9, TF, GNA15, CAV1, GCLC, ATOX1, SNCA, EDN1, PRND, CLDN11, BAK1, APP, APOE, NMUR2, LTF, MT3, KCNMA1, PTGER3, ACO1, CCDC47, LOC518911, KDR, P2RX7, ATP2A2, TSC1, LOC788801, LCK, F2, IFI6, F2R	1003	168	8785	1.56406	1	0.271705	23.1544
GOTERM_BP_FAT	GO:0055074~calcium ion homeostasis	14	0.703164	0.0207887	CAV1, GNA15, PTGER3, EDN1, CCDC47, KDR, BAK1, P2RX7, ATP2A2, APOE, NMUR2, F2, LCK, F2R	1003	62	8785	1.97778	1	0.335022	31.5797
GOTERM_BP_FAT	GO:0051480~cytosolic calcium ion homeostasis	9	0.452034	0.0241216	P2RX7, GNA15, CAV1, PTGER3, NMUR2, F2, LCK, EDN1, F2R	1003	32	8785	2.46339	1	0.368564	35.6666
GOTERM_BP_FAT	GO:0006875~cellular metal ion homeostasis	14	0.703164	0.0298868	KCNMA1, CAV1, GNA15, PTGER3, EDN1, BAK1, P2RX7, ATP2A2, APOE, NMUR2, F2, LCK, F2R, MT3	1003	65	8785	1.88649	1	0.411022	42.197
GOTERM_BP_FAT	GO:0006873~cellular ion homeostasis	26	1.30588	0.0349428	TF, GNA15, CAV1, GCLC, ATOX1, SNCA, EDN1, PRND, CLDN11, BAK1, APP, APOE, NMUR2, LTF, MT3, KCNMA1, PTGER3, ACO1, P2RX7, ATP2A2, TSC1, LOC788801, F2, LCK, IFI6, F2R	1003	151	8785	1.50812	1	0.447718	47.4037
GOTERM_BP_FAT	GO:0055082~cellular chemical homeostasis	26	1.30588	0.0401412	TF, GNA15, CAV1, GCLC, ATOX1, SNCA, EDN1, PRND, CLDN11, BAK1, APP, APOE, NMUR2, LTF, MT3, KCNMA1, PTGER3, ACO1, P2RX7, ATP2A2, TSC1, LOC788801, F2, LCK, IFI6, F2R	1003	153	8785	1.48841	1	0.48082	52.2931
GOTERM_BP_FAT	GO:0048878~chemical homeostasis	34	1.70768	0.0538195	SLC9A9, TF, RBP4, GNA15, CAV1, GCLC, ATOX1, PRND, SNCA, EDN1, CLDN11, BAK1, APP, APOA1, APOE, NMUR2, LTF, MT3, KCNMA1, PTGER3, EPAS1, ACO1, ACACA, CCDC47, LOC518911, KDR, P2RX7, ATP2A2, TSC1, LOC788801, LCK, F2, IFI6, F2R	1003	218	8785	1.36604	1	0.556694	63.189
GOTERM_BP_FAT	GO:0006874~cellular calcium ion homeostasis	12	0.602712	0.0744633	BAK1, P2RX7, GNA15, CAV1, PTGER3, ATP2A2, APOE, NMUR2, F2, LCK, EDN1, F2R	1003	60	8785	1.75174	1	0.650992	75.2878
GOTERM_BP_FAT	GO:0007204~elevation of cytosolic calcium ion concentration	7	0.351582	0.0793088	P2RX7, GNA15, PTGER3, NMUR2, LCK, EDN1, F2R	1003	27	8785	2.27078	1	0.670245	77.5234
Annotation Cluster 40	Enrichment Score: 1.894506328402718
Category	Term	Count	%	PValue	Genes	List Total	Pop Hits	Pop Total	Fold Enrichment	Bonferroni	Benjamini	FDR
SP_PIR_KEYWORDS	Lectin	20	1.00452	0.000386604	LY75, SELP, OLR1, MASP1, KLRK1, CHI3L1, LGALS8, COLEC12, GALNTL1, CALR, CLEC11A, LPHN2, CLEC3B, GALNTL4, FCN2, CALR3, VCAN, SELPLG, SELE, CLEC14A	1001	62	7349	2.36828	0.176753	0.0148501	0.555751
INTERPRO	IPR016186:C-type lectin-like	17	0.853842	0.00221691	COL18A1, LY75, KLRB1, SELP, OLR1, KLRK1, COLEC12, STAB2, CLEC11A, LYVE1, CLEC3B, CD69, VCAN, MRCL, KLRA1, SELE, CLEC14A	1235	56	9171	2.25429	0.978352	0.174398	3.68094
INTERPRO	IPR001304:C-type lectin	14	0.703164	0.010844	LY75, KLRB1, SELP, OLR1, KLRK1, COLEC12, CLEC11A, CLEC3B, CD69, VCAN, MRCL, KLRA1, SELE, CLEC14A	1235	49	9171	2.12169	1	0.489567	16.8271
SMART	SM00034:CLECT	14	0.703164	0.0217973	LY75, KLRB1, SELP, OLR1, KLRK1, COLEC12, CLEC11A, CLEC3B, CD69, VCAN, MRCL, KLRA1, SELE, CLEC14A	644	49	4364	1.93611	0.998248	0.469908	25.3728
UP_SEQ_FEATURE	domain:C-type lectin	6	0.301356	0.129164	SELP, OLR1, CLEC3B, COLEC12, VCAN, SELE	737	21	5635	2.18453	1	0.999262	90.4861
INTERPRO	IPR018378:C-type lectin, conserved site	8	0.401808	0.164141	LY75, SELP, OLR1, CLEC3B, COLEC12, VCAN, SELE, CLEC11A	1235	34	9171	1.74727	1	0.976022	95.1676
Annotation Cluster 41	Enrichment Score: 1.8219043255243286
Category	Term	Count	%	PValue	Genes	List Total	Pop Hits	Pop Total	Fold Enrichment	Bonferroni	Benjamini	FDR
INTERPRO	IPR000884:Thrombospondin, type 1 repeat	11	0.552486	0.000898065	NOV, C7, RSPO1, CTGF, ADAMTS1, SPON2, THBS1, ADAMTS2, ADAMTS5, SPON1, ADAMTS4	1235	25	9171	3.2674	0.788103	0.0872323	1.50681
SMART	SM00209:TSP1	11	0.552486	0.00180466	NOV, C7, RSPO1, CTGF, ADAMTS1, SPON2, THBS1, ADAMTS2, ADAMTS5, SPON1, ADAMTS4	644	25	4364	2.98161	0.405605	0.0830495	2.37017
UP_SEQ_FEATURE	domain:TSP type-1 1	4	0.200904	0.0517697	C7, THBS1, ADAMTS2, SPON1	737	7	5635	4.36906	1	0.982441	59.5127
UP_SEQ_FEATURE	domain:TSP type-1 2	4	0.200904	0.0517697	C7, THBS1, ADAMTS2, SPON1	737	7	5635	4.36906	1	0.982441	59.5127
UP_SEQ_FEATURE	domain:TSP type-1 3	3	0.150678	0.178906	THBS1, ADAMTS2, SPON1	737	6	5635	3.82293	1	0.999719	96.5015
Annotation Cluster 42	Enrichment Score: 1.8171887379863234
Category	Term	Count	%	PValue	Genes	List Total	Pop Hits	Pop Total	Fold Enrichment	Bonferroni	Benjamini	FDR
INTERPRO	IPR001007:von Willebrand factor, type C	8	0.401808	0.0064595	NOV, VWF, BMPER, CTGF, COL3A1, FSTL1, COL1A1, THBS1	1235	18	9171	3.3004	0.999986	0.385286	10.3727
SMART	SM00214:VWC	8	0.401808	0.010572	NOV, VWF, BMPER, CTGF, COL3A1, FSTL1, COL1A1, THBS1	644	18	4364	3.01173	0.953157	0.354209	13.1634
UP_SEQ_FEATURE	domain:VWFC	4	0.200904	0.0517697	CTGF, FSTL1, COL1A1, THBS1	737	7	5635	4.36906	1	0.982441	59.5127
Annotation Cluster 43	Enrichment Score: 1.7990342384372644
Category	Term	Count	%	PValue	Genes	List Total	Pop Hits	Pop Total	Fold Enrichment	Bonferroni	Benjamini	FDR
INTERPRO	IPR002181:Fibrinogen, alpha/beta/gamma chain, C-terminal globular	8	0.401808	0.0123494	TNXB, FCN2, ANGPT1, FGL2, FGL1, MFAP4, ANGPTL2, ANGPTL4	1235	20	9171	2.97036	1	0.522888	18.9404
UP_SEQ_FEATURE	domain:Fibrinogen C-terminal	6	0.301356	0.0134648	FCN2, ANGPT1, FGL2, FGL1, MFAP4, ANGPTL4	737	12	5635	3.82293	1	0.786958	20.593
INTERPRO	IPR014716:Fibrinogen, alpha/beta/gamma chain, C-terminal globular, subdomain 1	7	0.351582	0.0193776	TNXB, FCN2, FGL2, FGL1, MFAP4, ANGPTL2, ANGPTL4	1235	17	9171	3.05773	1	0.598817	28.1555
SMART	SM00186:FBG	8	0.401808	0.0197569	TNXB, FCN2, ANGPT1, FGL2, FGL1, MFAP4, ANGPTL2, ANGPTL4	644	20	4364	2.71056	0.996808	0.471943	23.279
Annotation Cluster 44	Enrichment Score: 1.787442803457412
Category	Term	Count	%	PValue	Genes	List Total	Pop Hits	Pop Total	Fold Enrichment	Bonferroni	Benjamini	FDR
GOTERM_BP_FAT	GO:0060323~head morphogenesis	5	0.25113	0.00806814	SCHIP1, PDGFRA, COL1A1, ASPH, MMP2	1003	8	8785	5.4742	1	0.185389	13.6136
GOTERM_BP_FAT	GO:0060325~face morphogenesis	5	0.25113	0.00806814	SCHIP1, PDGFRA, COL1A1, ASPH, MMP2	1003	8	8785	5.4742	1	0.185389	13.6136
GOTERM_BP_FAT	GO:0060324~face development	5	0.25113	0.0132244	SCHIP1, PDGFRA, COL1A1, ASPH, MMP2	1003	9	8785	4.86596	1	0.25762	21.3757
GOTERM_BP_FAT	GO:0060322~head development	5	0.25113	0.0132244	SCHIP1, PDGFRA, COL1A1, ASPH, MMP2	1003	9	8785	4.86596	1	0.25762	21.3757
GOTERM_BP_FAT	GO:0010171~body morphogenesis	5	0.25113	0.0200793	SCHIP1, PDGFRA, COL1A1, ASPH, MMP2	1003	10	8785	4.37936	1	0.328979	30.6787
GOTERM_BP_FAT	GO:0060021~palate development	5	0.25113	0.0824698	SCHIP1, PRRX1, PDGFRA, ASPH, COL11A2	1003	15	8785	2.91957	1	0.675737	78.8774
Annotation Cluster 45	Enrichment Score: 1.7345157460108194
Category	Term	Count	%	PValue	Genes	List Total	Pop Hits	Pop Total	Fold Enrichment	Bonferroni	Benjamini	FDR
GOTERM_MF_FAT	GO:0003756~protein disulfide isomerase activity	5	0.25113	0.000650699	P4HB, ERP44, PDIA3, PDIA5, PDIA4	1013	5	9249	9.13031	0.454115	0.0371274	1.01373
GOTERM_MF_FAT	GO:0016864~intramolecular oxidoreductase activity, transposing S-S bonds	5	0.25113	0.000650699	P4HB, ERP44, PDIA3, PDIA5, PDIA4	1013	5	9249	9.13031	0.454115	0.0371274	1.01373
UP_SEQ_FEATURE	domain:Thioredoxin 1	5	0.25113	0.00129459	P4HB, TXNDC11, PDIA3, PDIA5, PDIA4	737	5	5635	7.64586	0.905971	0.231015	2.17934
UP_SEQ_FEATURE	domain:Thioredoxin 2	5	0.25113	0.00129459	P4HB, TXNDC11, PDIA3, PDIA5, PDIA4	737	5	5635	7.64586	0.905971	0.231015	2.17934
GOTERM_MF_FAT	GO:0016862~intramolecular oxidoreductase activity, interconverting keto- and enol-groups	5	0.25113	0.00178249	P4HB, ERP44, PDIA3, PDIA5, PDIA4	1013	6	9249	7.60859	0.809708	0.0618216	2.75408
SP_PIR_KEYWORDS	Redox-active center	9	0.452034	0.0112102	P4HB, TXNDC11, PDIA3, TXN, VKORC1, PRDX4, PDIA5, PDIA4, ERO1L	1001	24	7349	2.75312	0.996554	0.157882	14.9966
GOTERM_BP_FAT	GO:0045454~cell redox homeostasis	12	0.602712	0.0342468	P4HB, ERP44, TXNDC11, PTGES2, GCLC, PDIA3, TXNDC5, TXN, PRDX4, PDIA5, PDIA4, SELS	1003	53	8785	1.98311	1	0.442796	46.7142
INTERPRO	IPR006662:Thioredoxin-like subdomain	5	0.25113	0.0350009	P4HB, PDIA3, TXN, PDIA5, PDIA4	1235	10	9171	3.71296	1	0.768921	45.2318
INTERPRO	IPR013766:Thioredoxin domain	7	0.351582	0.0531826	P4HB, ERP44, TXNDC11, PDIA3, TXN, PDIA5, PDIA4	1235	21	9171	2.4753	1	0.842852	60.2868
PIR_SUPERFAMILY	PIRSF001487:protein disulfide-isomerase	3	0.150678	0.0615687	P4HB, PDIA3, PDIA5	589	3	3890	6.60441	1	0.999394	60.7347
GOTERM_MF_FAT	GO:0016860~intramolecular oxidoreductase activity	7	0.351582	0.0674122	P4HB, ERP44, PTGES2, TBXAS1, PDIA3, PDIA5, PDIA4	1013	27	9249	2.36712	1	0.599154	66.462
INTERPRO	IPR017936:Thioredoxin-like	8	0.401808	0.0726332	P4HB, ERP44, TXNDC11, PDIA3, TXN, PRDX4, PDIA5, PDIA4	1235	28	9171	2.12169	1	0.889995	72.036
UP_SEQ_FEATURE	site:Contributes to redox potential value	3	0.150678	0.085341	P4HB, PDIA3, TXN	737	4	5635	5.7344	1	0.993826	78.0697
INTERPRO	IPR005788:Disulphide isomerase	3	0.150678	0.0900848	P4HB, PDIA3, PDIA4	1235	4	9171	5.56943	1	0.92482	79.7149
INTERPRO	IPR005792:Protein disulphide isomerase	3	0.150678	0.0900848	P4HB, PDIA3, PDIA4	1235	4	9171	5.56943	1	0.92482	79.7149
INTERPRO	IPR012335:Thioredoxin fold	16	0.803616	0.121611	P4HB, SPATA20, PDIA3, ERP27, ERP29, PRDX4, PDIA5, PDIA4, ERP44, TXNDC11, TXNDC17, CLIC4, GPX4, GPX3, TXN, GPX8	1235	81	9171	1.46685	1	0.955407	88.8212
INTERPRO	IPR017937:Thioredoxin, conserved site	6	0.301356	0.142047	P4HB, TXNDC11, PDIA3, TXN, PDIA5, PDIA4	1235	21	9171	2.12169	1	0.966363	92.4901
Annotation Cluster 46	Enrichment Score: 1.675045426061457
Category	Term	Count	%	PValue	Genes	List Total	Pop Hits	Pop Total	Fold Enrichment	Bonferroni	Benjamini	FDR
GOTERM_BP_FAT	GO:0001501~skeletal system development	26	1.30588	0.0019213	TWSG1, RBP4, SCHIP1, MMP9, EDN1, PRRX1, ZBTB16, MMP2, CTGF, PTN, COL11A2, SPP1, COL13A1, HSPG2, IGF2, SMAD1, MMP13, P2RX7, CLEC3B, PDGFRA, COL1A2, PDGFRB, COL1A1, BMPR1B, EIF2AK3, SERP1	1003	120	8785	1.89772	0.997365	0.0724172	3.41446
GOTERM_BP_FAT	GO:0001503~ossification	12	0.602712	0.0387478	TWSG1, COL13A1, CTGF, HSPG2, PTN, IGF2, COL1A1, SMAD1, EIF2AK3, MMP2, MMP13, SPP1	1003	54	8785	1.94638	1	0.475693	51.0265
GOTERM_BP_FAT	GO:0060348~bone development	12	0.602712	0.0387478	TWSG1, COL13A1, CTGF, HSPG2, PTN, IGF2, COL1A1, SMAD1, EIF2AK3, MMP2, MMP13, SPP1	1003	54	8785	1.94638	1	0.475693	51.0265
GOTERM_BP_FAT	GO:0031214~biomineral formation	6	0.301356	0.0691398	TUFT1, PTN, COL1A1, EIF2AK3, MMP13, SPP1	1003	20	8785	2.62762	1	0.629211	72.5901
Annotation Cluster 47	Enrichment Score: 1.6715818448010555
Category	Term	Count	%	PValue	Genes	List Total	Pop Hits	Pop Total	Fold Enrichment	Bonferroni	Benjamini	FDR
GOTERM_MF_FAT	GO:0004576~oligosaccharyl transferase activity	6	0.301356	0.000269947	STT3B, STT3A, RPN1, DAD1, RPN2, DDOST	1013	7	9249	7.82598	0.222043	0.0191288	0.421727
GOTERM_MF_FAT	GO:0004579~dolichyl-diphosphooligosaccharide-protein glycotransferase activity	5	0.25113	0.00178249	STT3A, RPN1, DAD1, RPN2, DDOST	1013	6	9249	7.60859	0.809708	0.0618216	2.75408
KEGG_PATHWAY	bta00510:N-Glycan biosynthesis	13	0.652938	0.00356187	ALG3, ALG5, DPAGT1, MAN1A1, STT3B, MGAT3, STT3A, DAD1, RPN1, DPM3, RPN2, DDOST, ALG14	624	41	4940	2.51016	0.47951	0.0632122	4.31157
GOTERM_BP_FAT	GO:0006487~protein amino acid N-linked glycosylation	5	0.25113	0.0287582	MGAT3, STT3A, CD4, RPN2, DDOST	1003	11	8785	3.98124	1	0.404205	40.9701
GOTERM_BP_FAT	GO:0018279~protein amino acid N-linked glycosylation via asparagine	3	0.150678	0.0360335	STT3A, RPN2, DDOST	1003	3	8785	8.75872	1	0.456256	48.4672
GOTERM_BP_FAT	GO:0018196~peptidyl-asparagine modification	3	0.150678	0.0360335	STT3A, RPN2, DDOST	1003	3	8785	8.75872	1	0.456256	48.4672
GOTERM_BP_FAT	GO:0009100~glycoprotein metabolic process	18	0.904068	0.0463957	FUT7, IDE, DCN, STT3B, ERP44, ST6GALNAC6, MGAT3, BGN, STT3A, ST3GAL2, B3GNT7, ST8SIA5, RPN1, CD4, RPN2, UGGT1, DDOST, ADAMTS4	1003	97	8785	1.62533	1	0.518019	57.6071
GOTERM_BP_FAT	GO:0043413~biopolymer glycosylation	13	0.652938	0.0888738	FUT7, STT3B, ST6GALNAC6, MGAT3, STT3A, ST3GAL2, B3GNT7, ST8SIA5, RPN1, CD4, RPN2, DDOST, UGGT1	1003	69	8785	1.65019	1	0.69357	81.3878
GOTERM_BP_FAT	GO:0006486~protein amino acid glycosylation	13	0.652938	0.0888738	FUT7, STT3B, ST6GALNAC6, MGAT3, STT3A, ST3GAL2, B3GNT7, ST8SIA5, RPN1, CD4, RPN2, DDOST, UGGT1	1003	69	8785	1.65019	1	0.69357	81.3878
GOTERM_BP_FAT	GO:0070085~glycosylation	13	0.652938	0.0888738	FUT7, STT3B, ST6GALNAC6, MGAT3, STT3A, ST3GAL2, B3GNT7, ST8SIA5, RPN1, CD4, RPN2, DDOST, UGGT1	1003	69	8785	1.65019	1	0.69357	81.3878
GOTERM_BP_FAT	GO:0009101~glycoprotein biosynthetic process	13	0.652938	0.196628	FUT7, STT3B, ST6GALNAC6, MGAT3, STT3A, ST3GAL2, B3GNT7, ST8SIA5, RPN1, CD4, RPN2, DDOST, UGGT1	1003	80	8785	1.42329	1	0.889441	98.0842
Annotation Cluster 48	Enrichment Score: 1.670878701208347
Category	Term	Count	%	PValue	Genes	List Total	Pop Hits	Pop Total	Fold Enrichment	Bonferroni	Benjamini	FDR
INTERPRO	IPR001179:Peptidyl-prolyl cis-trans isomerase, FKBP-type	8	0.401808	0.00445807	FKBP9, FKBP7, FKBP5, FKBP4, FKBP14, FKBP10, FKBP11, FKBP2	1235	17	9171	3.49455	0.999554	0.295834	7.27231
UP_SEQ_FEATURE	domain:PPIase FKBP-type 2	3	0.150678	0.0466776	FKBP9, FKBP4, FKBP10	737	3	5635	7.64586	1	0.984302	55.6512
UP_SEQ_FEATURE	domain:PPIase FKBP-type 1	3	0.150678	0.0466776	FKBP9, FKBP4, FKBP10	737	3	5635	7.64586	1	0.984302	55.6512
Annotation Cluster 49	Enrichment Score: 1.656088165017937
Category	Term	Count	%	PValue	Genes	List Total	Pop Hits	Pop Total	Fold Enrichment	Bonferroni	Benjamini	FDR
GOTERM_BP_FAT	GO:0009617~response to bacterium	24	1.20542	9.43125e-05	TNF, PGLYRP1, NFKBIA, BDKRB1, IL12RB2, DEFB5, STAT4, DEFB7, IFNG, LTF, IL1B, DEFB10, LBP, NOS2, IRAK1, LYZ2, TAP, STAB2, STAT1, BNBD-9-LIKE, P2RX7, CATHL2, KCNJ8, PTAFR, F2R	1003	88	8785	2.38874	0.252672	0.0076352	0.170236
GOTERM_BP_FAT	GO:0042742~defense response to bacterium	15	0.75339	0.00280243	LYZ2, TNF, PGLYRP1, TAP, STAB2, BNBD-9-LIKE, DEFB5, P2RX7, CATHL2, DEFB7, IFNG, LTF, DEFB10, NOS2, LBP	1003	55	8785	2.38874	0.999828	0.0898958	4.94325
SP_PIR_KEYWORDS	Antimicrobial	12	0.602712	0.0101651	DEFB5, CATHL2, LYZ2, DEFB7, S100A8, S100A9, PGLYRP1, LTF, TAP, DEFB10, LBP, BNBD-9-LIKE	1001	38	7349	2.31842	0.994138	0.148368	13.6926
INTERPRO	IPR006080:Mammalian defensin	5	0.25113	0.0234528	DEFB5, DEFB7, TAP, DEFB10, BNBD-9-LIKE	1235	9	9171	4.12551	1	0.631991	33.0376
SMART	SM00048:DEFSN	5	0.25113	0.0318111	DEFB5, DEFB7, TAP, DEFB10, BNBD-9-LIKE	644	9	4364	3.76467	0.99991	0.485745	34.9043
SP_PIR_KEYWORDS	antibiotic	9	0.452034	0.0508825	DEFB5, CATHL2, DEFB7, PGLYRP1, LTF, TAP, DEFB10, LBP, BNBD-9-LIKE	1001	31	7349	2.13145	1	0.44954	52.8889
SP_PIR_KEYWORDS	defensin	5	0.25113	0.05105	DEFB5, DEFB7, TAP, DEFB10, BNBD-9-LIKE	1001	11	7349	3.33712	1	0.443287	53.0085
SP_PIR_KEYWORDS	pyroglutamic acid	7	0.351582	0.0556599	DEFB5, DEFB7, ACO2, GPX3, COL1A2, DEFB10, COL1A1	1001	21	7349	2.44722	1	0.458222	56.1936
INTERPRO	IPR001855:Beta defensin	5	0.25113	0.0662842	DEFB5, DEFB7, TAP, DEFB10, BNBD-9-LIKE	1235	12	9171	3.09413	1	0.879373	68.6185
SP_PIR_KEYWORDS	antibacterial	3	0.150678	0.13967	DEFB5, DEFB7, DEFB10	1001	5	7349	4.405	1	0.728738	88.5617
PIR_SUPERFAMILY	PIRSF001878:crotamine	3	0.150678	0.226162	DEFB5, DEFB7, TAP	589	6	3890	3.30221	1	1	97.699
Annotation Cluster 50	Enrichment Score: 1.6397202947189686
Category	Term	Count	%	PValue	Genes	List Total	Pop Hits	Pop Total	Fold Enrichment	Bonferroni	Benjamini	FDR
GOTERM_BP_FAT	GO:0044259~multicellular organismal macromolecule metabolic process	9	0.452034	9.05517e-06	P2RX7, TNXB, MMP9, ACACA, COL1A1, MMP2, MMP13, SERPINH1, ADAMTS2	1003	12	8785	6.56904	0.0275751	0.00133066	0.0163566
GOTERM_BP_FAT	GO:0032963~collagen metabolic process	8	0.401808	5.36214e-05	P2RX7, TNXB, MMP9, COL1A1, MMP2, MMP13, SERPINH1, ADAMTS2	1003	11	8785	6.36998	0.152604	0.00516124	0.0968213
GOTERM_BP_FAT	GO:0044236~multicellular organismal metabolic process	9	0.452034	0.000154527	P2RX7, TNXB, MMP9, ACACA, COL1A1, MMP2, MMP13, SERPINH1, ADAMTS2	1003	16	8785	4.92678	0.379492	0.0110367	0.278781
SP_PIR_KEYWORDS	metalloprotease	16	0.803616	0.000758208	CPA5, MMP9, MMP19, IDE, ANPEP, MMP3, MMP14, MMP13, MMP2, ECE2, CPE, ERAP2, ADAMTS1, ADAMTS2, ADAMTS5, ADAMTS4	1001	46	7349	2.55362	0.31718	0.0198799	1.08723
INTERPRO	IPR006025:Peptidase M, neutral zinc metallopeptidases, zinc-binding site	10	0.50226	0.00194738	ECE2, MMP9, ERAP2, ANPEP, MMP14, MMP2, MMP13, ADAMTS2, ADAMTS5, ADAMTS4	1235	23	9171	3.22866	0.965487	0.162371	3.24033
INTERPRO	IPR002477:Peptidoglycan binding-like	6	0.301356	0.010007	MMP9, MMP19, MMP14, MMP3, MMP2, MMP13	1235	11	9171	4.0505	1	0.474446	15.6298
INTERPRO	IPR006026:Peptidase, metallopeptidases	6	0.301356	0.010007	MMP9, MMP19, MMP14, MMP3, MMP2, MMP13	1235	11	9171	4.0505	1	0.474446	15.6298
UP_SEQ_FEATURE	short sequence motif:Cysteine switch	5	0.25113	0.0130807	MMP9, MMP14, MMP2, MMP13, ADAMTS4	737	8	5635	4.77866	1	0.798505	20.0655
GOTERM_BP_FAT	GO:0044243~multicellular organismal catabolic process	5	0.25113	0.0132244	P2RX7, MMP9, MMP2, MMP13, ADAMTS2	1003	9	8785	4.86596	1	0.25762	21.3757
SMART	SM00235:ZnMc	6	0.301356	0.0146253	MMP9, MMP19, MMP14, MMP3, MMP2, MMP13	644	11	4364	3.69622	0.985638	0.41163	17.7705
GOTERM_MF_FAT	GO:0004222~metalloendopeptidase activity	17	0.853842	0.0186171	ADAM28, MMP9, MMP19, IDE, MMP3, MMP14, MMP13, MMP2, ECE2, ADAMTS1, ADAMTS12, ADAM19, ADAM12, ADAMTS2, ADAMTS5, ADAMTS4, ADAM15	1013	84	9249	1.8478	1	0.321846	25.4851
SP_PIR_KEYWORDS	collagen degradation	4	0.200904	0.0202913	MMP9, MMP2, MMP13, ADAMTS2	1001	5	7349	5.87333	0.999967	0.243225	25.5809
INTERPRO	IPR018487:Hemopexin/matrixin, repeat	6	0.301356	0.0221304	MMP9, MMP19, MMP14, MMP3, MMP2, MMP13	1235	13	9171	3.42734	1	0.62879	31.4887
INTERPRO	IPR000585:Hemopexin/matrixin	6	0.301356	0.0221304	MMP9, MMP19, MMP14, MMP3, MMP2, MMP13	1235	13	9171	3.42734	1	0.62879	31.4887
INTERPRO	IPR001818:Peptidase M10A and M12B, matrixin and adamalysin	6	0.301356	0.0221304	MMP9, MMP19, MMP14, MMP3, MMP2, MMP13	1235	13	9171	3.42734	1	0.62879	31.4887
GOTERM_BP_FAT	GO:0030574~collagen catabolic process	4	0.200904	0.0226891	MMP9, MMP2, MMP13, ADAMTS2	1003	6	8785	5.83915	1	0.356087	33.9391
SMART	SM00120:HX	6	0.301356	0.031642	MMP9, MMP19, MMP14, MMP3, MMP2, MMP13	644	13	4364	3.12757	0.999905	0.509496	34.7531
UP_SEQ_FEATURE	propeptide:Activation peptide	9	0.452034	0.0411987	CPA5, CTSK, CPE, F13A1, MMP9, CTSB, MMP14, MMP2, MMP13	737	31	5635	2.21977	1	0.982421	51.1105
UP_SEQ_FEATURE	domain:Hemopexin-like 1	4	0.200904	0.0517697	MMP9, MMP14, MMP2, MMP13	737	7	5635	4.36906	1	0.982441	59.5127
UP_SEQ_FEATURE	domain:Hemopexin-like 4	4	0.200904	0.0517697	MMP9, MMP14, MMP2, MMP13	737	7	5635	4.36906	1	0.982441	59.5127
UP_SEQ_FEATURE	domain:Hemopexin-like 3	4	0.200904	0.0517697	MMP9, MMP14, MMP2, MMP13	737	7	5635	4.36906	1	0.982441	59.5127
UP_SEQ_FEATURE	domain:Hemopexin-like 2	4	0.200904	0.0517697	MMP9, MMP14, MMP2, MMP13	737	7	5635	4.36906	1	0.982441	59.5127
UP_SEQ_FEATURE	metal ion-binding site:Zinc 2; in inhibited form	3	0.150678	0.085341	MMP9, MMP2, MMP13	737	4	5635	5.7344	1	0.993826	78.0697
UP_SEQ_FEATURE	metal ion-binding site:Zinc 2; catalytic	3	0.150678	0.130172	MMP9, MMP2, MMP13	737	5	5635	4.58752	1	0.99915	90.6718
INTERPRO	IPR018486:Hemopexin/matrixin, conserved site	4	0.200904	0.141288	MMP9, MMP14, MMP2, MMP13	1235	10	9171	2.97036	1	0.967168	92.377
INTERPRO	IPR016293:Peptidase M10A, matrix metallopeotidase	3	0.150678	0.187811	MMP19, MMP14, MMP13	1235	6	9171	3.71296	1	0.984661	97.026
PIR_SUPERFAMILY	PIRSF001191:Peptidase_M10A_matrix	3	0.150678	0.226162	MMP19, MMP14, MMP13	589	6	3890	3.30221	1	1	97.699
UP_SEQ_FEATURE	metal ion-binding site:Calcium 3; via carbonyl oxygen	3	0.150678	0.382779	MMP9, MMP2, MMP13	737	10	5635	2.29376	1	0.999998	99.9727
UP_SEQ_FEATURE	metal ion-binding site:Calcium 3	3	0.150678	0.431235	MMP9, COLEC12, MMP2	737	11	5635	2.08523	1	0.999999	99.9932
UP_SEQ_FEATURE	metal ion-binding site:Calcium 2; via carbonyl oxygen	4	0.200904	0.460235	MMP9, COLEC12, MMP2, MMP13	737	19	5635	1.60966	1	1	99.9972
UP_SEQ_FEATURE	metal ion-binding site:Calcium 1	4	0.200904	0.460235	MMP9, COLEC12, MMP2, MMP13	737	19	5635	1.60966	1	1	99.9972
UP_SEQ_FEATURE	metal ion-binding site:Calcium 2	4	0.200904	0.593939	MMP9, COLEC12, MMP2, MMP13	737	23	5635	1.32972	1	1	100
Annotation Cluster 51	Enrichment Score: 1.6189904469175174
Category	Term	Count	%	PValue	Genes	List Total	Pop Hits	Pop Total	Fold Enrichment	Bonferroni	Benjamini	FDR
UP_SEQ_FEATURE	domain:EGF-like 1	10	0.50226	0.00220843	THBD, CRELD2, FBN1, TEK, MFGE8, VCAN, TIE1, THBS1, PROS1, PROC	737	24	5635	3.18578	0.982312	0.332012	3.69073
UP_SEQ_FEATURE	domain:EGF-like 2	6	0.301356	0.0476824	THBD, FBN1, TEK, MFGE8, TIE1, PROC	737	16	5635	2.8672	1	0.97928	56.4396
UP_SEQ_FEATURE	domain:EGF-like 3	4	0.200904	0.132004	FBN1, TEK, TIE1, THBS1	737	10	5635	3.05834	1	0.999072	91.0003
Annotation Cluster 52	Enrichment Score: 1.6149234121335685
Category	Term	Count	%	PValue	Genes	List Total	Pop Hits	Pop Total	Fold Enrichment	Bonferroni	Benjamini	FDR
GOTERM_BP_FAT	GO:0060627~regulation of vesicle-mediated transport	11	0.552486	0.0102743	FCER1A, CDH13, ADORA3, C3, RAB4A, SNCA, MFGE8, RAB26, CALR, PTX3, SELE	1003	39	8785	2.47041	1	0.217544	17.0194
GOTERM_BP_FAT	GO:0045807~positive regulation of endocytosis	6	0.301356	0.0112153	C3, SNCA, MFGE8, CALR, PTX3, SELE	1003	13	8785	4.04249	1	0.231913	18.433
GOTERM_BP_FAT	GO:0030100~regulation of endocytosis	8	0.401808	0.0186453	CDH13, C3, RAB4A, SNCA, MFGE8, CALR, PTX3, SELE	1003	25	8785	2.80279	1	0.31269	28.8231
GOTERM_BP_FAT	GO:0050766~positive regulation of phagocytosis	4	0.200904	0.0533701	C3, MFGE8, CALR, PTX3	1003	8	8785	4.37936	1	0.555308	62.8719
GOTERM_BP_FAT	GO:0050764~regulation of phagocytosis	4	0.200904	0.073443	C3, MFGE8, CALR, PTX3	1003	9	8785	3.89277	1	0.648975	74.791
Annotation Cluster 53	Enrichment Score: 1.6126540062918313
Category	Term	Count	%	PValue	Genes	List Total	Pop Hits	Pop Total	Fold Enrichment	Bonferroni	Benjamini	FDR
GOTERM_BP_FAT	GO:0007167~enzyme linked receptor protein signaling pathway	29	1.45655	0.0016183	SCHIP1, TWSG1, ACVRL1, COL3A1, FST, EPHB3, DDR2, CTGF, TEK, ANGPT1, TIE1, PLAT, FLT3, FLT4, AXL, SMAD1, TAB1, KDR, DOK1, GRB10, MSX1, PDGFRA, COL1A2, PDGFRB, SPTBN1, TGFB1I1, BMPR1B, HPGD, EIF2AK3	1003	138	8785	1.8406	0.993271	0.0671054	2.88338
GOTERM_MF_FAT	GO:0004714~transmembrane receptor protein tyrosine kinase activity	10	0.50226	0.0518403	FLT3, FLT4, TEK, AXL, PDGFRA, PDGFRB, TIE1, EPHB3, DDR2, KDR	1013	45	9249	2.02896	1	0.538619	56.5376
GOTERM_BP_FAT	GO:0007169~transmembrane receptor protein tyrosine kinase signaling pathway	17	0.853842	0.0554121	PLAT, SCHIP1, FLT3, FLT4, AXL, EPHB3, DDR2, KDR, DOK1, GRB10, CTGF, TEK, PDGFRA, PDGFRB, ANGPT1, TIE1, EIF2AK3	1003	92	8785	1.61846	1	0.56582	64.2924
GOTERM_MF_FAT	GO:0004713~protein tyrosine kinase activity	17	0.853842	0.0762174	ITK, FLT3, FLT4, BMX, AXL, EPHB3, DDR2, KDR, LCK, TEK, PDGFRA, PDGFRB, WIF1, TIE1, BMPR1B, TEC, MATK	1013	100	9249	1.55215	1	0.630771	71.0902
Annotation Cluster 54	Enrichment Score: 1.5985573865339011
Category	Term	Count	%	PValue	Genes	List Total	Pop Hits	Pop Total	Fold Enrichment	Bonferroni	Benjamini	FDR
GOTERM_BP_FAT	GO:0043009~chordate embryonic development	29	1.45655	0.0158159	RBP4, ACVRL1, EDN1, PAX6, PRRX1, GJA1, ITGB1, ADA, LY6E, DAD1, GINS1, EPAS1, EOMES, HSPG2, TAB1, FZD6, ASCL2, TJP1, MSX1, SFRP1, TSC1, SFRP2, MEOX1, PHGDH, PDGFRA, HOPX, PDGFRB, COL1A1, MYH10	1003	162	8785	1.56792	1	0.286227	25.0233
GOTERM_BP_FAT	GO:0009792~embryonic development ending in birth or egg hatching	29	1.45655	0.0170923	RBP4, ACVRL1, EDN1, PAX6, PRRX1, GJA1, ITGB1, ADA, LY6E, DAD1, GINS1, EPAS1, EOMES, HSPG2, TAB1, FZD6, ASCL2, TJP1, MSX1, SFRP1, TSC1, SFRP2, MEOX1, PHGDH, PDGFRA, HOPX, PDGFRB, COL1A1, MYH10	1003	163	8785	1.5583	1	0.29387	26.7606
GOTERM_BP_FAT	GO:0001701~in utero embryonic development	18	0.904068	0.0592154	GINS1, ACVRL1, EPAS1, EDN1, EOMES, GJA1, TAB1, ITGB1, ADA, ASCL2, TJP1, MSX1, LY6E, PDGFRA, DAD1, HOPX, PDGFRB, MYH10	1003	100	8785	1.57657	1	0.585556	66.8023
Annotation Cluster 55	Enrichment Score: 1.5561868796045972
Category	Term	Count	%	PValue	Genes	List Total	Pop Hits	Pop Total	Fold Enrichment	Bonferroni	Benjamini	FDR
GOTERM_BP_FAT	GO:0051345~positive regulation of hydrolase activity	15	0.75339	0.000524452	GNA15, PTGER3, TNF, RALBP1, EDN1, BAK1, APOA1, TSC1, NMUR2, LCK, IFNG, HSPD1, EIF2AK3, SELE, F2R	1003	47	8785	2.79534	0.802088	0.0290238	0.943179
GOTERM_BP_FAT	GO:0032844~regulation of homeostatic process	12	0.602712	0.00263258	BAK1, P2RX7, GCLC, LMO2, F2, LCK, IFNG, INPP5D, EIF2AK3, ADA, IFI6, F2R	1003	38	8785	2.76591	0.999708	0.0864762	4.65035
GOTERM_BP_FAT	GO:0006919~activation of caspase activity	6	0.301356	0.0461819	BAK1, TNF, LCK, HSPD1, EIF2AK3, F2R	1003	18	8785	2.91957	1	0.519874	57.4351
GOTERM_BP_FAT	GO:0052547~regulation of peptidase activity	9	0.452034	0.0462617	BAK1, CAV1, TNF, LCK, CST3, HSPD1, EIF2AK3, IFI6, F2R	1003	36	8785	2.18968	1	0.518732	57.4995
GOTERM_BP_FAT	GO:0043280~positive regulation of caspase activity	6	0.301356	0.0691398	BAK1, TNF, LCK, HSPD1, EIF2AK3, F2R	1003	20	8785	2.62762	1	0.629211	72.5901
GOTERM_BP_FAT	GO:0010952~positive regulation of peptidase activity	6	0.301356	0.0691398	BAK1, TNF, LCK, HSPD1, EIF2AK3, F2R	1003	20	8785	2.62762	1	0.629211	72.5901
GOTERM_BP_FAT	GO:0043281~regulation of caspase activity	7	0.351582	0.150517	BAK1, TNF, LCK, HSPD1, EIF2AK3, IFI6, F2R	1003	32	8785	1.91597	1	0.829241	94.7495
GOTERM_BP_FAT	GO:0052548~regulation of endopeptidase activity	7	0.351582	0.167372	BAK1, TNF, LCK, HSPD1, EIF2AK3, IFI6, F2R	1003	33	8785	1.85791	1	0.855873	96.3443
Annotation Cluster 56	Enrichment Score: 1.5365249775349086
Category	Term	Count	%	PValue	Genes	List Total	Pop Hits	Pop Total	Fold Enrichment	Bonferroni	Benjamini	FDR
UP_SEQ_FEATURE	domain:Fibronectin type-III 3	5	0.25113	0.00728728	IL12RB2, TEK, TIE1, FN1, IFNAR1	737	7	5635	5.46133	0.999998	0.641837	11.6979
UP_SEQ_FEATURE	domain:Fibronectin type-III 1	6	0.301356	0.0195722	IL12RB2, TEK, TIE1, VWA1, FN1, IFNAR1	737	13	5635	3.52886	1	0.880204	28.5527
UP_SEQ_FEATURE	domain:Fibronectin type-III 2	6	0.301356	0.0195722	IL12RB2, TEK, TIE1, VWA1, FN1, IFNAR1	737	13	5635	3.52886	1	0.880204	28.5527
INTERPRO	IPR008957:Fibronectin, type III-like fold	14	0.703164	0.0366085	TNXB, IL23R, PTPRG, EPB42, OSMR, IFNAR1, IL12RB2, TEK, MYBPH, EPOR, TIE1, VWA1, MYLK, FN1	1235	57	9171	1.82391	1	0.768655	46.7534
INTERPRO	IPR003961:Fibronectin, type III	13	0.652938	0.0586983	TNXB, IL23R, PTPRG, IFNAR1, IL12RB2, TEK, MYBPH, ROBO4, EPOR, TIE1, VWA1, MYLK, FN1	1235	55	9171	1.75522	1	0.855519	64.0203
SMART	SM00060:FN3	13	0.652938	0.100647	TNXB, IL23R, PTPRG, IFNAR1, IL12RB2, TEK, MYBPH, ROBO4, EPOR, TIE1, VWA1, MYLK, FN1	644	55	4364	1.60169	1	0.750594	75.5542
Annotation Cluster 57	Enrichment Score: 1.5308281144071785
Category	Term	Count	%	PValue	Genes	List Total	Pop Hits	Pop Total	Fold Enrichment	Bonferroni	Benjamini	FDR
GOTERM_MF_FAT	GO:0019955~cytokine binding	19	0.954294	0.000116269	PLP2, IL1R2, IL2RB, A2M, LOC529196, CXCR2, CXCR3, IL7R, TNFRSF4, IFNAR1, IL12RB2, CCR7, CCR5, CCR4, IL1RAP, CXCR6, CCBP2, EPOR, IL13RA1	1013	64	9249	2.71056	0.102495	0.00978245	0.181848
GOTERM_MF_FAT	GO:0042277~peptide binding	24	1.20542	0.000457239	SRP14, KDELR2, F2RL1, NPR1, NFKBIA, LOC529196, BDKRB1, CXCR2, CXCR3, PPIF, EDNRA, HCRTR1, CCR7, CCR5, PPIB, NMUR1, CCR4, NMUR2, PPID, CXCR6, PPIC, CCBP2, KDELR1, F2R	1013	101	9249	2.16958	0.346445	0.0299238	0.713347
GOTERM_MF_FAT	GO:0019956~chemokine binding	10	0.50226	0.000870979	PLP2, CCR7, A2M, CCR5, CCR4, CXCR6, LOC529196, CCBP2, CXCR2, CXCR3	1013	25	9249	3.65212	0.555303	0.0417539	1.35472
GOTERM_MF_FAT	GO:0016493~C-C chemokine receptor activity	7	0.351582	0.00722516	CCR7, CCR5, CCR4, CXCR6, LOC529196, CCBP2, CXCR3	1013	17	9249	3.75954	0.998822	0.184829	10.7305
GOTERM_MF_FAT	GO:0019957~C-C chemokine binding	7	0.351582	0.00722516	CCR7, CCR5, CCR4, CXCR6, LOC529196, CCBP2, CXCR3	1013	17	9249	3.75954	0.998822	0.184829	10.7305
GOTERM_MF_FAT	GO:0004950~chemokine receptor activity	8	0.401808	0.00932545	CCR7, CCR5, CCR4, CXCR6, LOC529196, CCBP2, CXCR2, CXCR3	1013	23	9249	3.17576	0.999836	0.220383	13.6413
INTERPRO	IPR000355:Chemokine receptor	7	0.351582	0.00993087	CCR7, CCR5, CCR4, CXCR6, LOC529196, CCBP2, CXCR3	1235	15	9171	3.46543	1	0.49815	15.52
PIR_SUPERFAMILY	PIRSF038545:chemokine receptor	7	0.351582	0.0172283	CCR7, CCR5, CCR4, LOC529196, CCBP2, CXCR2, CXCR3	589	15	3890	3.08206	0.99996	0.965858	22.5593
GOTERM_MF_FAT	GO:0001653~peptide receptor activity	16	0.803616	0.0310739	F2RL1, LOC529196, NPR1, BDKRB1, CXCR2, CXCR3, EDNRA, HCRTR1, CCR7, CCR5, NMUR1, CCR4, NMUR2, CXCR6, CCBP2, F2R	1013	82	9249	1.78152	1	0.419377	38.9901
GOTERM_MF_FAT	GO:0008528~peptide receptor activity, G-protein coupled	16	0.803616	0.0310739	F2RL1, LOC529196, NPR1, BDKRB1, CXCR2, CXCR3, EDNRA, HCRTR1, CCR7, CCR5, NMUR1, CCR4, NMUR2, CXCR6, CCBP2, F2R	1013	82	9249	1.78152	1	0.419377	38.9901
GOTERM_MF_FAT	GO:0019958~C-X-C chemokine binding	4	0.200904	0.0662779	A2M, CXCR6, CXCR2, CXCR3	1013	9	9249	4.05791	1	0.597913	65.8177
SP_PIR_KEYWORDS	g-protein coupled receptor	31	1.55701	0.116544	ADORA3, FFAR2, F2RL1, CXCR2, CXCR3, S1PR2, LPHN2, EDNRA, S1PR3, APLNR, HCRTR1, ADRB3, NMUR2, CXCR6, CCBP2, CALCRL, PTGER3, PTGER4, LOC529196, MRGPRF, FZD6, CCR7, P2RY10, FZD10, GPR34, CCR5, DARC, CCR4, PTGDR, PTAFR, F2R	1001	177	7349	1.28583	1	0.6847	83.2355
INTERPRO	IPR000276:7TM GPCR, rhodopsin-like	28	1.40633	0.153031	ADORA3, FFAR2, F2RL1, BDKRB1, CXCR2, CXCR3, S1PR2, EDNRA, S1PR3, APLNR, HCRTR1, ADRB3, NMUR2, CXCR6, CCBP2, PTGER3, PTGER4, LOC529196, MRGPRF, CCR7, P2RY10, GPR34, CCR5, GPR37, CCR4, PTGDR, PTAFR, F2R	1235	164	9171	1.26784	1	0.972277	93.9595
INTERPRO	IPR017452:GPCR, rhodopsin-like superfamily	28	1.40633	0.160802	ADORA3, FFAR2, F2RL1, BDKRB1, CXCR2, CXCR3, S1PR2, EDNRA, S1PR3, APLNR, HCRTR1, ADRB3, NMUR2, CXCR6, CCBP2, PTGER3, PTGER4, LOC529196, MRGPRF, CCR7, P2RY10, GPR34, CCR5, GPR37, CCR4, PTGDR, PTAFR, F2R	1235	165	9171	1.26015	1	0.975082	94.8308
SP_PIR_KEYWORDS	transducer	34	1.70768	0.185048	ADORA3, FFAR2, F2RL1, CXCR2, CXCR3, S1PR2, LPHN2, EDNRA, S1PR3, APLNR, HCRTR1, ADRB3, NMUR2, CXCR6, CCBP2, CALCRL, PLCB1, GNG5, PTGER3, GNAO1, PTGER4, LOC529196, MRGPRF, FZD6, CCR7, P2RY10, FZD10, GPR34, CCR5, CCR4, DARC, PTGDR, PTAFR, F2R	1001	207	7349	1.20588	1	0.784807	94.7617
GOTERM_MF_FAT	GO:0016494~C-X-C chemokine receptor activity	3	0.150678	0.215284	CXCR6, CXCR2, CXCR3	1013	8	9249	3.42386	1	0.86402	97.7516
PIR_SUPERFAMILY	PIRSF800006:rhodopsin-like G protein-coupled receptors	21	1.05475	0.309424	ADORA3, PTGER3, PTGER4, LOC529196, BDKRB1, CXCR2, MRGPRF, CXCR3, EDNRA, APLNR, HCRTR1, ADRB3, S1PR3, CCR7, GPR34, CCR5, DARC, CCR4, NMUR2, CXCR6, CCBP2	589	117	3890	1.18541	1	1	99.5689
KEGG_PATHWAY	bta04080:Neuroactive ligand-receptor interaction	24	1.20542	0.940776	GABRD, PTGER3, PTGER4, ADORA2A, F2RL1, BDKRB1, S1PR2, EDNRA, P2RX5, APLNR, HCRTR1, ADRB3, S1PR3, P2RY10, P2RX7, NMUR1, NMUR2, PTGDR, CNR2, S1PR5, F2, CALCRL, PTAFR, F2R	624	239	4940	0.794979	1	0.992745	100
GOTERM_BP_FAT	GO:0007186~G-protein coupled receptor protein signaling pathway	57	2.86288	1	GNA15, ADORA3, GPR124, F2RL1, EDN1, CXCR2, CXCR3, EDNRA, LPHN2, S1PR2, S1PR3, APOA1, NMUR1, APOE, NMUR2, S1PR5, CXCR6, ELTD1, CALCRL, GNG5, GPR174, PTGER3, PTGER4, GPR133, GPR132, MRGPRF, CCR7, CCR5, CCR4, DARC, PTGDR, LOC505037, PTAFR, FFAR2, BDKRB1, HCRTR1, ADRB3, APLNR, CNR2, CCBP2, ENTPD1, GNAO1, LOC528254, GPR75, LOC529196, CISH, RGS13, FZD6, GPR153, P2RY10, FZD10, GPR34, GPR37, GPR114, RGS9…	1003	1162	8785	0.429645	1	1	100
Annotation Cluster 58	Enrichment Score: 1.4954455530723567
Category	Term	Count	%	PValue	Genes	List Total	Pop Hits	Pop Total	Fold Enrichment	Bonferroni	Benjamini	FDR
GOTERM_BP_FAT	GO:0006541~glutamine metabolic process	6	0.301356	0.00760592	GFPT2, GGH, PHGDH, ASNS, CTPS2, ASL	1003	12	8785	4.37936	1	0.181109	12.8835
UP_SEQ_FEATURE	active site:For GATase activity	3	0.150678	0.0466776	GFPT2, ASNS, CTPS2	737	3	5635	7.64586	1	0.984302	55.6512
SP_PIR_KEYWORDS	glutamine amidotransferase	3	0.150678	0.0919184	GFPT2, ASNS, CTPS2	1001	4	7349	5.50624	1	0.606506	75.0843
Annotation Cluster 59	Enrichment Score: 1.4894180959138585
Category	Term	Count	%	PValue	Genes	List Total	Pop Hits	Pop Total	Fold Enrichment	Bonferroni	Benjamini	FDR
GOTERM_BP_FAT	GO:0042981~regulation of apoptosis	52	2.61175	0.00145052	PDIA3, MMP9, SNCA, EIF5A, BAK1, CASP3, CASP4, CASP9, APOE, IFNG, IL1B, NOS3, FAS, TERT, RAB27A, KCNMA1, CDK1, CD3G, NOL3, BCL2L14, CD3E, AARS, BCL2A1, MBD4, CARD10, PROC, MSX1, BTG1, SCIN, LCK, EIF2AK3, GCLC, TNF, ASNS, ZBTB16, TNFRSF4, ADA, DAD1, INPP5D, TRAF5, NEFL, ANGPTL4, SCG2, IL4, EEF1A2, SELS, CDH13, HSP90B1, P2RX7, HSPD1, IFI6, F2R	1003	295	8785	1.54391	0.988694	0.0637929	2.58814
GOTERM_BP_FAT	GO:0043067~regulation of programmed cell death	52	2.61175	0.00181666	PDIA3, MMP9, SNCA, EIF5A, BAK1, CASP3, CASP4, CASP9, APOE, IFNG, IL1B, NOS3, FAS, TERT, RAB27A, KCNMA1, CDK1, CD3G, NOL3, BCL2L14, CD3E, AARS, BCL2A1, MBD4, CARD10, PROC, MSX1, BTG1, SCIN, LCK, EIF2AK3, GCLC, TNF, ASNS, ZBTB16, TNFRSF4, ADA, DAD1, INPP5D, TRAF5, NEFL, ANGPTL4, SCG2, IL4, EEF1A2, SELS, CDH13, HSP90B1, P2RX7, HSPD1, IFI6, F2R	1003	298	8785	1.52837	0.996357	0.0694566	3.23137
GOTERM_BP_FAT	GO:0010941~regulation of cell death	52	2.61175	0.00195553	PDIA3, MMP9, SNCA, EIF5A, BAK1, CASP3, CASP4, CASP9, APOE, IFNG, IL1B, NOS3, FAS, TERT, RAB27A, KCNMA1, CDK1, CD3G, NOL3, BCL2L14, CD3E, AARS, BCL2A1, MBD4, CARD10, PROC, MSX1, BTG1, SCIN, LCK, EIF2AK3, GCLC, TNF, ASNS, ZBTB16, TNFRSF4, ADA, DAD1, INPP5D, TRAF5, NEFL, ANGPTL4, SCG2, IL4, EEF1A2, SELS, CDH13, HSP90B1, P2RX7, HSPD1, IFI6, F2R	1003	299	8785	1.52326	0.997629	0.0727735	3.47428
GOTERM_BP_FAT	GO:0043066~negative regulation of apoptosis	27	1.3561	0.0136156	GCLC, TNF, SNCA, ASNS, ADA, CASP3, CASP4, APOE, DAD1, IL1B, NOS3, FAS, NEFL, TERT, ANGPTL4, SCG2, IL4, CDK1, EEF1A2, AARS, SELS, PROC, CDH13, HSP90B1, MSX1, HSPD1, IFI6	1003	146	8785	1.61976	1	0.260945	21.9368
GOTERM_BP_FAT	GO:0043069~negative regulation of programmed cell death	27	1.3561	0.016084	GCLC, TNF, SNCA, ASNS, ADA, CASP3, CASP4, APOE, DAD1, IL1B, NOS3, FAS, NEFL, TERT, ANGPTL4, SCG2, IL4, CDK1, EEF1A2, AARS, SELS, PROC, CDH13, HSP90B1, MSX1, HSPD1, IFI6	1003	148	8785	1.59788	1	0.283808	25.3914
GOTERM_BP_FAT	GO:0060548~negative regulation of cell death	27	1.3561	0.016084	GCLC, TNF, SNCA, ASNS, ADA, CASP3, CASP4, APOE, DAD1, IL1B, NOS3, FAS, NEFL, TERT, ANGPTL4, SCG2, IL4, CDK1, EEF1A2, AARS, SELS, PROC, CDH13, HSP90B1, MSX1, HSPD1, IFI6	1003	148	8785	1.59788	1	0.283808	25.3914
GOTERM_BP_FAT	GO:0006916~anti-apoptosis	13	0.652938	0.0502345	CDK1, GCLC, TNF, EEF1A2, SELS, CDH13, HSP90B1, APOE, DAD1, IL1B, NOS3, IFI6, TERT	1003	63	8785	1.80736	1	0.53819	60.5863
GOTERM_BP_FAT	GO:0043065~positive regulation of apoptosis	20	1.00452	0.0861867	KCNMA1, TNF, PDIA3, CD3E, MMP9, EIF5A, MBD4, ZBTB16, BAK1, CASP3, P2RX7, CASP4, APOE, LCK, IFNG, SCIN, HSPD1, FAS, INPP5D, RAB27A	1003	120	8785	1.45979	1	0.686407	80.3708
GOTERM_BP_FAT	GO:0043068~positive regulation of programmed cell death	20	1.00452	0.0918641	KCNMA1, TNF, PDIA3, CD3E, MMP9, EIF5A, MBD4, ZBTB16, BAK1, CASP3, P2RX7, CASP4, APOE, LCK, IFNG, SCIN, HSPD1, FAS, INPP5D, RAB27A	1003	121	8785	1.44772	1	0.701686	82.4609
GOTERM_BP_FAT	GO:0010942~positive regulation of cell death	20	1.00452	0.097777	KCNMA1, TNF, PDIA3, CD3E, MMP9, EIF5A, MBD4, ZBTB16, BAK1, CASP3, P2RX7, CASP4, APOE, LCK, IFNG, SCIN, HSPD1, FAS, INPP5D, RAB27A	1003	122	8785	1.43586	1	0.718008	84.4131
GOTERM_BP_FAT	GO:0008624~induction of apoptosis by extracellular signals	4	0.200904	0.240398	CASP3, TNF, CD3E, FAS	1003	15	8785	2.33566	1	0.927242	99.3037
GOTERM_BP_FAT	GO:0012502~induction of programmed cell death	10	0.50226	0.505781	CASP3, TNF, CASP4, APOE, CD3E, LCK, EIF5A, MBD4, FAS, RAB27A	1003	76	8785	1.15246	1	0.99492	99.9997
GOTERM_BP_FAT	GO:0006917~induction of apoptosis	10	0.50226	0.505781	CASP3, TNF, CASP4, APOE, CD3E, LCK, EIF5A, MBD4, FAS, RAB27A	1003	76	8785	1.15246	1	0.99492	99.9997
Annotation Cluster 60	Enrichment Score: 1.4806153599435439
Category	Term	Count	%	PValue	Genes	List Total	Pop Hits	Pop Total	Fold Enrichment	Bonferroni	Benjamini	FDR
GOTERM_CC_FAT	GO:0030176~integral to endoplasmic reticulum membrane	9	0.452034	0.009826	PIGK, DERL1, SPCS1, DPM3, ELOVL6, ASPH, SEC61A1, SELS, SSR3	850	26	6966	2.83683	0.97535	0.123877	12.7539
GOTERM_CC_FAT	GO:0031301~integral to organelle membrane	15	0.75339	0.0226615	DERL1, TOMM40, SELS, PIGK, ST6GALNAC6, ST3GAL2, ST8SIA5, ETFDH, SPCS1, DPM3, ASPH, ELOVL6, STEAP2, SEC61A1, SSR3	850	65	6966	1.89122	0.999815	0.229318	27.1462
GOTERM_CC_FAT	GO:0031300~intrinsic to organelle membrane	15	0.75339	0.0731707	DERL1, TOMM40, SELS, PIGK, ST6GALNAC6, ST3GAL2, ST8SIA5, ETFDH, SPCS1, DPM3, ASPH, ELOVL6, STEAP2, SEC61A1, SSR3	850	76	6966	1.61749	1	0.454619	65.0026
GOTERM_CC_FAT	GO:0031227~intrinsic to endoplasmic reticulum membrane	9	0.452034	0.0733731	PIGK, DERL1, SPCS1, DPM3, ELOVL6, ASPH, SEC61A1, SELS, SSR3	850	37	6966	1.99345	1	0.448628	65.1081
Annotation Cluster 61	Enrichment Score: 1.4559209062052525
Category	Term	Count	%	PValue	Genes	List Total	Pop Hits	Pop Total	Fold Enrichment	Bonferroni	Benjamini	FDR
INTERPRO	IPR001023:Heat shock protein Hsp70	5	0.25113	0.0350009	HSPH1, HSPA1A, HSPA13, HSPA5, HSPA9	1235	10	9171	3.71296	1	0.768921	45.2318
INTERPRO	IPR013126:Heat shock protein 70	5	0.25113	0.0350009	HSPH1, HSPA1A, HSPA13, HSPA5, HSPA9	1235	10	9171	3.71296	1	0.768921	45.2318
INTERPRO	IPR018181:Heat shock protein 70, conserved site	5	0.25113	0.0350009	HSPH1, HSPA1A, HSPA13, HSPA5, HSPA9	1235	10	9171	3.71296	1	0.768921	45.2318
Annotation Cluster 62	Enrichment Score: 1.4545199631331125
Category	Term	Count	%	PValue	Genes	List Total	Pop Hits	Pop Total	Fold Enrichment	Bonferroni	Benjamini	FDR
GOTERM_BP_FAT	GO:0010811~positive regulation of cell-substrate adhesion	7	0.351582	0.0158974	CDH13, TSC1, CCDC80, NID1, COL8A1, THBS1, SPP1	1003	19	8785	3.2269	1	0.284205	25.1354
GOTERM_BP_FAT	GO:0010810~regulation of cell-substrate adhesion	8	0.401808	0.033991	CDH13, TSC1, CCDC80, NID1, COL1A1, COL8A1, THBS1, SPP1	1003	28	8785	2.50249	1	0.442085	46.4586
GOTERM_BP_FAT	GO:0030155~regulation of cell adhesion	13	0.652938	0.0502345	TNF, IL8, CCDC80, NID1, ADA, CDH13, LAMA4, TSC1, LAMA5, COL1A1, THBS1, COL8A1, SPP1	1003	63	8785	1.80736	1	0.53819	60.5863
GOTERM_BP_FAT	GO:0045785~positive regulation of cell adhesion	8	0.401808	0.0560053	CDH13, TNF, TSC1, CCDC80, NID1, COL8A1, THBS1, SPP1	1003	31	8785	2.26032	1	0.568078	64.6953
Annotation Cluster 63	Enrichment Score: 1.4519148006943376
Category	Term	Count	%	PValue	Genes	List Total	Pop Hits	Pop Total	Fold Enrichment	Bonferroni	Benjamini	FDR
GOTERM_BP_FAT	GO:0051605~protein maturation by peptide bond cleavage	12	0.602712	0.00263258	C7, SEC11C, CFB, C3, MMP14, LOC781004, ECE2, CPE, FCN2, CFH, SPCS3, SPCS1, ADAMTS2	1003	38	8785	2.76591	0.999708	0.0864762	4.65035
GOTERM_BP_FAT	GO:0051604~protein maturation	14	0.703164	0.00766501	C7, SEC11C, C3, CFB, MMP14, LOC781004, SERPINH1, P2RX7, ECE2, CPE, FCN2, CFH, SPCS3, SPCS1, ADAMTS2	1003	55	8785	2.22949	1	0.179635	12.9772
GOTERM_BP_FAT	GO:0016485~protein processing	13	0.652938	0.0123862	C7, SEC11C, C3, CFB, MMP14, LOC781004, P2RX7, ECE2, CPE, FCN2, CFH, SPCS3, SPCS1, ADAMTS2	1003	52	8785	2.18968	1	0.246476	20.1603
GOTERM_BP_FAT	GO:0006959~humoral immune response	8	0.401808	0.0230734	C7, SH2D1A, TNF, C3, CFB, FCN2, CFH, LOC781004, LTA	1003	26	8785	2.69499	1	0.357406	34.4067
GOTERM_BP_FAT	GO:0006957~complement activation, alternative pathway	4	0.200904	0.0363819	C7, C3, CFB, CFH, LOC781004	1003	7	8785	5.00499	1	0.457729	48.8026
GOTERM_BP_FAT	GO:0045087~innate immune response	13	0.652938	0.0404369	C7, IL18R1, TLR10, IL18RAP, CFB, C3, SNCA, TLR3, TLR6, LOC781004, FCN2, CFH, LBP, RAB27A	1003	61	8785	1.86661	1	0.481612	52.5579
SP_PIR_KEYWORDS	complement alternate pathway	4	0.200904	0.0575442	C7, C3, CFB, CFH, LOC781004	1001	7	7349	4.19523	1	0.462626	57.4366
GOTERM_BP_FAT	GO:0006956~complement activation	5	0.25113	0.163648	C7, C3, CFB, FCN2, CFH, LOC781004	1003	19	8785	2.30493	1	0.850865	96.0373
GOTERM_BP_FAT	GO:0002541~activation of plasma proteins involved in acute inflammatory response	5	0.25113	0.163648	C7, C3, CFB, FCN2, CFH, LOC781004	1003	19	8785	2.30493	1	0.850865	96.0373
SP_PIR_KEYWORDS	innate immunity	8	0.401808	0.231434	C7, TLR10, C3, CFB, FCN2, CFH, CRCP, TLR3, LOC781004	1001	37	7349	1.58739	1	0.828879	97.749
Annotation Cluster 64	Enrichment Score: 1.4497401225283428
Category	Term	Count	%	PValue	Genes	List Total	Pop Hits	Pop Total	Fold Enrichment	Bonferroni	Benjamini	FDR
GOTERM_BP_FAT	GO:0002697~regulation of immune effector process	16	0.803616	0.000239695	FCER1A, IL4, RBP4, CRTAM, A2M, ADORA3, TNF, C3, KLRK1, SH2D1A, P2RX7, CD37, APOA1, IFNG, LBP, HSPD1	1003	49	8785	2.85999	0.523014	0.0153039	0.432118
GOTERM_BP_FAT	GO:0050778~positive regulation of immune response	20	1.00452	0.000813233	FCER1A, IRAK1, C7, CRTAM, C3, CFB, THEMIS, KLRK1, NFKBIA, CACNB3, IDO1, LOC781004, ADA, SH2D1A, P2RX7, LAX1, FCN2, LCK, CFH, LBP, HSPD1	1003	77	8785	2.27499	0.918917	0.0410069	1.45893
GOTERM_BP_FAT	GO:0031349~positive regulation of defense response	11	0.552486	0.00358667	FCER1A, IRAK1, CRTAM, SH2D1A, ADORA3, C3, KLRK1, NFKBIA, IDO1, LBP, HSPD1	1003	34	8785	2.8337	0.999985	0.110233	6.28468
GOTERM_BP_FAT	GO:0002699~positive regulation of immune effector process	10	0.50226	0.00379304	FCER1A, P2RX7, CRTAM, CD37, SH2D1A, ADORA3, C3, KLRK1, LBP, HSPD1	1003	29	8785	3.02025	0.999992	0.113949	6.6347
GOTERM_BP_FAT	GO:0002703~regulation of leukocyte mediated immunity	10	0.50226	0.0143171	FCER1A, IL4, P2RX7, CRTAM, SH2D1A, ADORA3, C3, IFNG, KLRK1, HSPD1	1003	35	8785	2.50249	1	0.27081	22.9337
GOTERM_BP_FAT	GO:0031341~regulation of cell killing	6	0.301356	0.0158363	P2RX7, CRTAM, SH2D1A, IFNG, KLRK1, NOS2	1003	14	8785	3.75374	1	0.284899	25.0514
GOTERM_BP_FAT	GO:0031343~positive regulation of cell killing	6	0.301356	0.0158363	P2RX7, CRTAM, SH2D1A, IFNG, KLRK1, NOS2	1003	14	8785	3.75374	1	0.284899	25.0514
GOTERM_BP_FAT	GO:0002706~regulation of lymphocyte mediated immunity	9	0.452034	0.0241216	FCER1A, IL4, P2RX7, CRTAM, SH2D1A, C3, IFNG, KLRK1, HSPD1	1003	32	8785	2.46339	1	0.368564	35.6666
GOTERM_BP_FAT	GO:0045088~regulation of innate immune response	8	0.401808	0.0281759	IRAK1, CRTAM, A2M, SH2D1A, KLRK1, NFKBIA, LBP, HSPD1	1003	27	8785	2.59518	1	0.403168	40.3274
GOTERM_BP_FAT	GO:0002708~positive regulation of lymphocyte mediated immunity	7	0.351582	0.0325233	FCER1A, P2RX7, CRTAM, SH2D1A, C3, KLRK1, HSPD1	1003	22	8785	2.78687	1	0.432906	44.9699
GOTERM_BP_FAT	GO:0002705~positive regulation of leukocyte mediated immunity	7	0.351582	0.0325233	FCER1A, P2RX7, CRTAM, SH2D1A, C3, KLRK1, HSPD1	1003	22	8785	2.78687	1	0.432906	44.9699
GOTERM_BP_FAT	GO:0002824~positive regulation of adaptive immune response based on somatic recombination of immune receptors built from immunoglobulin superfamily domains	6	0.301356	0.0461819	FCER1A, P2RX7, C3, IDO1, HSPD1, ADA	1003	18	8785	2.91957	1	0.519874	57.4351
GOTERM_BP_FAT	GO:0002821~positive regulation of adaptive immune response	6	0.301356	0.0461819	FCER1A, P2RX7, C3, IDO1, HSPD1, ADA	1003	18	8785	2.91957	1	0.519874	57.4351
GOTERM_BP_FAT	GO:0045089~positive regulation of innate immune response	7	0.351582	0.0482438	IRAK1, CRTAM, SH2D1A, KLRK1, NFKBIA, LBP, HSPD1	1003	24	8785	2.55463	1	0.525186	59.067
GOTERM_BP_FAT	GO:0002819~regulation of adaptive immune response	8	0.401808	0.0560053	FCER1A, IL4, P2RX7, C3, IFNG, IDO1, HSPD1, ADA	1003	31	8785	2.26032	1	0.568078	64.6953
GOTERM_BP_FAT	GO:0002822~regulation of adaptive immune response based on somatic recombination of immune receptors built from immunoglobulin superfamily domains	8	0.401808	0.0560053	FCER1A, IL4, P2RX7, C3, IFNG, IDO1, HSPD1, ADA	1003	31	8785	2.26032	1	0.568078	64.6953
GOTERM_BP_FAT	GO:0001910~regulation of leukocyte mediated cytotoxicity	4	0.200904	0.149084	P2RX7, CRTAM, SH2D1A, KLRK1	1003	12	8785	2.91957	1	0.828229	94.5871
GOTERM_BP_FAT	GO:0001912~positive regulation of leukocyte mediated cytotoxicity	4	0.200904	0.149084	P2RX7, CRTAM, SH2D1A, KLRK1	1003	12	8785	2.91957	1	0.828229	94.5871
GOTERM_BP_FAT	GO:0002889~regulation of immunoglobulin mediated immune response	4	0.200904	0.178259	FCER1A, IL4, C3, IFNG	1003	13	8785	2.69499	1	0.871033	97.1179
GOTERM_BP_FAT	GO:0002712~regulation of B cell mediated immunity	4	0.200904	0.178259	FCER1A, IL4, C3, IFNG	1003	13	8785	2.69499	1	0.871033	97.1179
GOTERM_BP_FAT	GO:0042269~regulation of natural killer cell mediated cytotoxicity	3	0.150678	0.318611	CRTAM, SH2D1A, KLRK1	1003	10	8785	2.62762	1	0.964456	99.9022
GOTERM_BP_FAT	GO:0045954~positive regulation of natural killer cell mediated cytotoxicity	3	0.150678	0.318611	CRTAM, SH2D1A, KLRK1	1003	10	8785	2.62762	1	0.964456	99.9022
GOTERM_BP_FAT	GO:0002717~positive regulation of natural killer cell mediated immunity	3	0.150678	0.318611	CRTAM, SH2D1A, KLRK1	1003	10	8785	2.62762	1	0.964456	99.9022
GOTERM_BP_FAT	GO:0002715~regulation of natural killer cell mediated immunity	3	0.150678	0.318611	CRTAM, SH2D1A, KLRK1	1003	10	8785	2.62762	1	0.964456	99.9022
Annotation Cluster 65	Enrichment Score: 1.445442854006549
Category	Term	Count	%	PValue	Genes	List Total	Pop Hits	Pop Total	Fold Enrichment	Bonferroni	Benjamini	FDR
GOTERM_BP_FAT	GO:0010647~positive regulation of cell communication	29	1.45655	0.000537377	TWSG1, TNF, ADORA3, CD8A, SNCA, PRRX1, TLR3, GJA1, TLR6, ADA, ADRB3, RASGRP4, IFNG, IL1B, CD4, LBP, THBS1, FCER1A, IL4, GOLT1B, CD3E, HCLS1, IGF2, TRAT1, HHEX, CDH13, P2RX7, TGFB1I1, F2R	1003	129	8785	1.96902	0.809835	0.0292055	0.966317
GOTERM_BP_FAT	GO:0009967~positive regulation of signal transduction	28	1.40633	0.000556948	TWSG1, ADORA3, TNF, CD8A, PRRX1, TLR3, GJA1, TLR6, ADA, ADRB3, RASGRP4, IFNG, IL1B, CD4, LBP, THBS1, FCER1A, IL4, CD3E, GOLT1B, HCLS1, IGF2, TRAT1, HHEX, CDH13, P2RX7, TGFB1I1, F2R	1003	123	8785	1.99386	0.820994	0.0297304	1.00134
GOTERM_BP_FAT	GO:0043408~regulation of MAPKKK cascade	13	0.652938	0.00153586	FCER1A, CAV1, TNXB, TNF, EDN1, TLR3, IGF2, TLR6, TIMP2, ADRB3, P2RX7, IL1B, F2R	1003	41	8785	2.77716	0.991317	0.0646651	2.73843
GOTERM_BP_FAT	GO:0046328~regulation of JNK cascade	7	0.351582	0.0158974	FCER1A, TNF, TNXB, EDN1, IL1B, TLR3, TLR6	1003	19	8785	3.2269	1	0.284205	25.1354
GOTERM_BP_FAT	GO:0043405~regulation of MAP kinase activity	12	0.602712	0.0171432	FCER1A, P2RX7, CAV1, TNF, TNXB, APOE, LAX1, EDN1, IL1B, TLR6, THBS1, TRIB2	1003	48	8785	2.18968	1	0.293008	26.8291
GOTERM_BP_FAT	GO:0070302~regulation of stress-activated protein kinase signaling pathway	7	0.351582	0.0205719	FCER1A, TNF, TNXB, EDN1, IL1B, TLR3, TLR6	1003	20	8785	3.06555	1	0.333861	31.3056
GOTERM_BP_FAT	GO:0080135~regulation of cellular response to stress	10	0.50226	0.0242459	RNF8, FCER1A, TNF, TNXB, FAM175A, EDN1, IL1B, TLR3, TLR6, APBB1	1003	38	8785	2.30493	1	0.36831	35.8144
GOTERM_BP_FAT	GO:0010627~regulation of protein kinase cascade	19	0.954294	0.0247324	FCER1A, IL4, CAV1, TNF, ADORA3, TNXB, GOLT1B, HCLS1, EDN1, GJA1, TLR3, IGF2, TIMP2, TLR6, ADRB3, P2RX7, IFNG, IL1B, F2R	1003	97	8785	1.71563	1	0.372409	36.3901
GOTERM_BP_FAT	GO:0043506~regulation of JUN kinase activity	4	0.200904	0.0363819	FCER1A, TNXB, EDN1, TLR6	1003	7	8785	5.00499	1	0.457729	48.8026
GOTERM_BP_FAT	GO:0043410~positive regulation of MAPKKK cascade	7	0.351582	0.0398951	ADRB3, P2RX7, TNF, IL1B, TLR3, IGF2, F2R	1003	23	8785	2.6657	1	0.480452	52.0716
GOTERM_BP_FAT	GO:0010740~positive regulation of protein kinase cascade	14	0.703164	0.0738615	IL4, ADORA3, TNF, GOLT1B, HCLS1, GJA1, TLR3, IGF2, TLR6, ADRB3, P2RX7, IFNG, IL1B, F2R	1003	74	8785	1.65706	1	0.649515	74.9959
GOTERM_BP_FAT	GO:0051347~positive regulation of transferase activity	14	0.703164	0.0804822	FCER1A, IRAK1, TNF, EDN1, TAB1, TLR6, CISH, P2RX7, APOA1, CCND3, CCND2, IL1B, THBS1, VLDLR	1003	75	8785	1.63496	1	0.67268	78.0353
GOTERM_BP_FAT	GO:0045860~positive regulation of protein kinase activity	13	0.652938	0.0814358	FCER1A, IRAK1, TNF, EDN1, TAB1, TLR6, CISH, P2RX7, CCND3, CCND2, IL1B, THBS1, VLDLR	1003	68	8785	1.67446	1	0.674034	78.4432
GOTERM_BP_FAT	GO:0043507~positive regulation of JUN kinase activity	3	0.150678	0.102828	FCER1A, EDN1, TLR6	1003	5	8785	5.25523	1	0.728499	85.9165
GOTERM_BP_FAT	GO:0033674~positive regulation of kinase activity	13	0.652938	0.104966	FCER1A, IRAK1, TNF, EDN1, TAB1, TLR6, CISH, P2RX7, CCND3, CCND2, IL1B, THBS1, VLDLR	1003	71	8785	1.60371	1	0.734805	86.5106
GOTERM_BP_FAT	GO:0000165~MAPKKK cascade	10	0.50226	0.144053	FCER1A, P2RX7, CAV1, TNF, LAX1, IL1B, SMAD1, TAB1, THBS1, SCG2	1003	53	8785	1.65259	1	0.819017	93.9789
GOTERM_BP_FAT	GO:0043406~positive regulation of MAP kinase activity	7	0.351582	0.150517	FCER1A, P2RX7, TNF, EDN1, IL1B, TLR6, THBS1	1003	32	8785	1.91597	1	0.829241	94.7495
GOTERM_BP_FAT	GO:0000187~activation of MAPK activity	5	0.25113	0.263497	FCER1A, P2RX7, TNF, IL1B, THBS1	1003	23	8785	1.90407	1	0.940849	99.6014
GOTERM_BP_FAT	GO:0043123~positive regulation of I-kappaB kinase/NF-kappaB cascade	7	0.351582	0.408545	TNF, GOLT1B, IL1B, TLR3, GJA1, TLR6, F2R	1003	45	8785	1.36247	1	0.985187	99.9924
GOTERM_BP_FAT	GO:0043122~regulation of I-kappaB kinase/NF-kappaB cascade	7	0.351582	0.450893	TNF, GOLT1B, IL1B, TLR3, GJA1, TLR6, F2R	1003	47	8785	1.30449	1	0.99078	99.998
Annotation Cluster 66	Enrichment Score: 1.4419164099995547
Category	Term	Count	%	PValue	Genes	List Total	Pop Hits	Pop Total	Fold Enrichment	Bonferroni	Benjamini	FDR
GOTERM_MF_FAT	GO:0042802~identical protein binding	39	1.95881	0.0208439	TNF, CLDN4, CD8A, CLDN3, TUFT1, SNCA, IDE, NFKBIA, ZBTB16, ITGB3, RABAC1, ADRB3, ECE2, APOA1, APOE, UPK1A, CD2, GALE, NOS2, NEFL, TERT, GPD1, S100A16, PDXK, PTPRG, OLFML2B, S100A11, KCTD20, SMAD1, IRF9, CDH13, VWF, LOC781339, SDS, VEGFA, COL1A2, QPRT, COL1A1, PARP1	1013	249	9249	1.43005	1	0.335101	28.0882
GOTERM_MF_FAT	GO:0046983~protein dimerization activity	34	1.70768	0.0349036	GCLC, CD8A, CREM, IDE, ZBTB16, ADRB3, ECE2, APOE, UPK1A, CD2, CREB3L2, GALE, NOS2, TERT, GPD1, IRAK1, PDXK, S100A16, CD3G, NFE2, EPAS1, CD3D, OLFML2B, PM20D1, S100A11, CREB5, VWF, CDH13, LOC781339, DBP, SDS, VEGFA, QPRT, NFE2L3	1013	219	9249	1.41749	1	0.423439	42.6575
GOTERM_MF_FAT	GO:0042803~protein homodimerization activity	22	1.10497	0.0649232	GPD1, S100A16, PDXK, CD8A, OLFML2B, IDE, S100A11, ZBTB16, VWF, ADRB3, CDH13, ECE2, LOC781339, APOE, SDS, UPK1A, VEGFA, CD2, GALE, QPRT, NOS2, TERT	1013	136	9249	1.47696	1	0.595357	65.0331
Annotation Cluster 67	Enrichment Score: 1.4388034628604085
Category	Term	Count	%	PValue	Genes	List Total	Pop Hits	Pop Total	Fold Enrichment	Bonferroni	Benjamini	FDR
GOTERM_MF_FAT	GO:0015082~di-, tri-valent inorganic cation transmembrane transporter activity	8	0.401808	0.00283049	SLC39A14, ATP2B2, ATP2A2, ATP2A3, SNCA, SLC31A1, ATP7B, SLC30A7	1013	19	9249	3.84434	0.928359	0.0868907	4.34001
GOTERM_MF_FAT	GO:0046915~transition metal ion transmembrane transporter activity	5	0.25113	0.0454694	SLC39A14, SNCA, SLC31A1, ATP7B, SLC30A7	1013	13	9249	3.51166	1	0.502437	51.7342
GOTERM_MF_FAT	GO:0022890~inorganic cation transmembrane transporter activity	14	0.703164	0.37498	SLC9A9, SLC39A14, COX7A2, SNCA, LOC518911, ATP1A1, UQCRQ, ATP2B2, ATP2A2, ATP2A3, SLC31A1, UQCRB, SLC30A7, ATP7B	1013	106	9249	1.20589	1	0.958841	99.9362
Annotation Cluster 68	Enrichment Score: 1.4061365499463283
Category	Term	Count	%	PValue	Genes	List Total	Pop Hits	Pop Total	Fold Enrichment	Bonferroni	Benjamini	FDR
GOTERM_BP_FAT	GO:0045428~regulation of nitric oxide biosynthetic process	7	0.351582	0.000603254	CAV1, LOC781339, TNF, IFNG, KLRK1, IL1B, PTX3	1003	11	8785	5.57373	0.844857	0.0316172	1.08417
GOTERM_BP_FAT	GO:0045429~positive regulation of nitric oxide biosynthetic process	6	0.301356	0.00162278	LOC781339, TNF, IFNG, KLRK1, IL1B, PTX3	1003	9	8785	5.83915	0.993364	0.0663949	2.89127
GOTERM_BP_FAT	GO:0030162~regulation of proteolysis	8	0.401808	0.00251282	A2M, TNF, GCLC, AURKAIP1, APOE, IFNG, IL1B, THBS1	1003	18	8785	3.89277	0.999578	0.0835943	4.44331
GOTERM_BP_FAT	GO:0050796~regulation of insulin secretion	7	0.351582	0.00632385	GCG, RBP4, TNF, IFNG, IL1B, NOS2, SERP1	1003	16	8785	3.83194	1	0.16179	10.8278
GOTERM_BP_FAT	GO:0045862~positive regulation of proteolysis	6	0.301356	0.00760592	TNF, GCLC, AURKAIP1, APOE, IFNG, IL1B	1003	12	8785	4.37936	1	0.181109	12.8835
GOTERM_BP_FAT	GO:0045732~positive regulation of protein catabolic process	6	0.301356	0.0112153	TNF, GCLC, APOE, IFNG, IL1B, GJA1	1003	13	8785	4.04249	1	0.231913	18.433
GOTERM_BP_FAT	GO:0002791~regulation of peptide secretion	7	0.351582	0.0120115	GCG, RBP4, TNF, IFNG, IL1B, NOS2, SERP1	1003	18	8785	3.40617	1	0.244648	19.6113
GOTERM_BP_FAT	GO:0051044~positive regulation of membrane protein ectodomain proteolysis	4	0.200904	0.0123884	TNF, APOE, IFNG, IL1B	1003	5	8785	7.00698	1	0.244957	20.1636
GOTERM_BP_FAT	GO:0046883~regulation of hormone secretion	8	0.401808	0.0148488	GCG, RBP4, TNF, IFNG, EDN1, IL1B, NOS2, SERP1	1003	24	8785	2.91957	1	0.27444	23.6812
GOTERM_BP_FAT	GO:0048660~regulation of smooth muscle cell proliferation	5	0.25113	0.0200793	CDH13, TNF, IFNG, EDN1, CALCRL	1003	10	8785	4.37936	1	0.328979	30.6787
GOTERM_BP_FAT	GO:0045080~positive regulation of chemokine biosynthetic process	4	0.200904	0.0226891	TNF, IFNG, IL1B, TLR3	1003	6	8785	5.83915	1	0.356087	33.9391
GOTERM_BP_FAT	GO:0060559~positive regulation of calcidiol 1-monooxygenase activity	3	0.150678	0.0360335	TNF, IFNG, IL1B	1003	3	8785	8.75872	1	0.456256	48.4672
GOTERM_BP_FAT	GO:0051043~regulation of membrane protein ectodomain proteolysis	4	0.200904	0.0363819	TNF, APOE, IFNG, IL1B	1003	7	8785	5.00499	1	0.457729	48.8026
GOTERM_BP_FAT	GO:0045940~positive regulation of steroid metabolic process	4	0.200904	0.0363819	TNF, APOA1, APOE, IFNG	1003	7	8785	5.00499	1	0.457729	48.8026
GOTERM_BP_FAT	GO:0032770~positive regulation of monooxygenase activity	4	0.200904	0.0363819	TNF, APOE, IFNG, IL1B	1003	7	8785	5.00499	1	0.457729	48.8026
GOTERM_BP_FAT	GO:0051353~positive regulation of oxidoreductase activity	5	0.25113	0.0393344	TNF, APOE, IFNG, EDN1, IL1B	1003	12	8785	3.64947	1	0.479101	51.5635
GOTERM_BP_FAT	GO:0032768~regulation of monooxygenase activity	5	0.25113	0.0518317	TNF, APOE, IFNG, SNCA, IL1B	1003	13	8785	3.36874	1	0.546228	61.7667
GOTERM_BP_FAT	GO:0050810~regulation of steroid biosynthetic process	4	0.200904	0.0533701	TNF, APOE, IFNG, ATP1A1	1003	8	8785	4.37936	1	0.555308	62.8719
GOTERM_BP_FAT	GO:0045073~regulation of chemokine biosynthetic process	4	0.200904	0.0533701	TNF, IFNG, IL1B, TLR3	1003	8	8785	4.37936	1	0.555308	62.8719
GOTERM_BP_FAT	GO:0060558~regulation of calcidiol 1-monooxygenase activity	3	0.150678	0.0666525	TNF, IFNG, IL1B	1003	4	8785	6.56904	1	0.618565	71.2364
GOTERM_BP_FAT	GO:0051341~regulation of oxidoreductase activity	6	0.301356	0.0691398	TNF, APOE, IFNG, SNCA, EDN1, IL1B	1003	20	8785	2.62762	1	0.629211	72.5901
GOTERM_BP_FAT	GO:0019218~regulation of steroid metabolic process	5	0.25113	0.0824698	TNF, APOA1, APOE, IFNG, ATP1A1	1003	15	8785	2.91957	1	0.675737	78.8774
GOTERM_BP_FAT	GO:0031331~positive regulation of cellular catabolic process	5	0.25113	0.0824698	TNF, GCLC, APOE, IFNG, IL1B	1003	15	8785	2.91957	1	0.675737	78.8774
GOTERM_BP_FAT	GO:0042176~regulation of protein catabolic process	6	0.301356	0.0825908	TNF, GCLC, APOE, IFNG, IL1B, GJA1	1003	21	8785	2.50249	1	0.674752	78.9277
GOTERM_BP_FAT	GO:0032642~regulation of chemokine production	4	0.200904	0.0963131	TNF, IFNG, IL1B, TLR3	1003	10	8785	3.50349	1	0.716631	83.9499
GOTERM_BP_FAT	GO:0009896~positive regulation of catabolic process	6	0.301356	0.0973166	TNF, GCLC, APOE, IFNG, IL1B, GJA1	1003	22	8785	2.38874	1	0.717659	84.2688
GOTERM_BP_FAT	GO:0031329~regulation of cellular catabolic process	6	0.301356	0.113267	TNF, GCLC, APOE, IFNG, CST3, IL1B	1003	23	8785	2.28488	1	0.757522	88.6003
GOTERM_BP_FAT	GO:0051235~maintenance of location	6	0.301356	0.113267	KDELR2, TNF, APOE, IL1B, NFKBIA, KDELR1	1003	23	8785	2.28488	1	0.757522	88.6003
GOTERM_BP_FAT	GO:0019216~regulation of lipid metabolic process	8	0.401808	0.135297	CAV1, TNF, APOA1, APOE, IFNG, SNCA, IL1B, ATP1A1	1003	38	8785	1.84394	1	0.802216	92.7637
GOTERM_BP_FAT	GO:0045833~negative regulation of lipid metabolic process	4	0.200904	0.149084	TNF, APOE, IL1B, ATP1A1	1003	12	8785	2.91957	1	0.828229	94.5871
GOTERM_BP_FAT	GO:0045834~positive regulation of lipid metabolic process	5	0.25113	0.163648	TNF, APOA1, APOE, IFNG, IL1B	1003	19	8785	2.30493	1	0.850865	96.0373
GOTERM_BP_FAT	GO:0019915~lipid storage	4	0.200904	0.178259	CAV1, TNF, APOA1, IL1B	1003	13	8785	2.69499	1	0.871033	97.1179
GOTERM_BP_FAT	GO:0009894~regulation of catabolic process	7	0.351582	0.203265	TNF, GCLC, APOE, IFNG, CST3, IL1B, GJA1	1003	35	8785	1.75174	1	0.895258	98.3508
GOTERM_BP_FAT	GO:0046890~regulation of lipid biosynthetic process	4	0.200904	0.272692	TNF, APOE, IFNG, ATP1A1	1003	16	8785	2.18968	1	0.946405	99.6823
GOTERM_BP_FAT	GO:0009895~negative regulation of catabolic process	3	0.150678	0.446274	TNF, CST3, IL1B	1003	13	8785	2.02124	1	0.990271	99.9977
Annotation Cluster 69	Enrichment Score: 1.3946288745945299
Category	Term	Count	%	PValue	Genes	List Total	Pop Hits	Pop Total	Fold Enrichment	Bonferroni	Benjamini	FDR
GOTERM_BP_FAT	GO:0009069~serine family amino acid metabolic process	7	0.351582	0.0120115	CTH, SHMT2, DHFR, GCLC, SDS, PHGDH, PSPH	1003	18	8785	3.40617	1	0.244648	19.6113
GOTERM_BP_FAT	GO:0009070~serine family amino acid biosynthetic process	4	0.200904	0.0363819	CTH, DHFR, PHGDH, PSPH	1003	7	8785	5.00499	1	0.457729	48.8026
GOTERM_BP_FAT	GO:0006563~L-serine metabolic process	4	0.200904	0.0533701	SHMT2, SDS, PHGDH, PSPH	1003	8	8785	4.37936	1	0.555308	62.8719
KEGG_PATHWAY	bta00260:Glycine, serine and threonine metabolism	8	0.401808	0.113163	CHDH, CTH, SHMT2, GATM, SDS, MAOA, PHGDH, PSPH	624	33	4940	1.91919	1	0.507836	77.3122
Annotation Cluster 70	Enrichment Score: 1.3915788189180662
Category	Term	Count	%	PValue	Genes	List Total	Pop Hits	Pop Total	Fold Enrichment	Bonferroni	Benjamini	FDR
GOTERM_MF_FAT	GO:0003950~NAD+ ADP-ribosyltransferase activity	5	0.25113	0.0174155	PARP16, PARP9, PARP14, TIPARP, PARP1	1013	10	9249	4.56515	1	0.316125	24.044
INTERPRO	IPR012317:Poly(ADP-ribose) polymerase, catalytic region	4	0.200904	0.0196764	PARP16, PARP9, PARP14, PARP1	1235	5	9171	5.94073	1	0.594711	28.5246
GOTERM_MF_FAT	GO:0016763~transferase activity, transferring pentosyl groups	7	0.351582	0.195156	PARP16, PARP9, PARP14, TIPARP, UPP1, QPRT, PARP1	1013	36	9249	1.77534	1	0.843136	96.6576
Annotation Cluster 71	Enrichment Score: 1.3842919300727252
Category	Term	Count	%	PValue	Genes	List Total	Pop Hits	Pop Total	Fold Enrichment	Bonferroni	Benjamini	FDR
GOTERM_BP_FAT	GO:0051345~positive regulation of hydrolase activity	15	0.75339	0.000524452	GNA15, PTGER3, TNF, RALBP1, EDN1, BAK1, APOA1, TSC1, NMUR2, LCK, IFNG, HSPD1, EIF2AK3, SELE, F2R	1003	47	8785	2.79534	0.802088	0.0290238	0.943179
GOTERM_BP_FAT	GO:0051480~cytosolic calcium ion homeostasis	9	0.452034	0.0241216	P2RX7, GNA15, CAV1, PTGER3, NMUR2, F2, LCK, EDN1, F2R	1003	32	8785	2.46339	1	0.368564	35.6666
GOTERM_BP_FAT	GO:0007202~activation of phospholipase C activity	5	0.25113	0.0287582	GNA15, PTGER3, NMUR2, EDN1, SELE	1003	11	8785	3.98124	1	0.404205	40.9701
GOTERM_BP_FAT	GO:0010863~positive regulation of phospholipase C activity	5	0.25113	0.0287582	GNA15, PTGER3, NMUR2, EDN1, SELE	1003	11	8785	3.98124	1	0.404205	40.9701
GOTERM_BP_FAT	GO:0010518~positive regulation of phospholipase activity	5	0.25113	0.0393344	GNA15, PTGER3, NMUR2, EDN1, SELE	1003	12	8785	3.64947	1	0.479101	51.5635
GOTERM_BP_FAT	GO:0010517~regulation of phospholipase activity	5	0.25113	0.0662299	GNA15, PTGER3, NMUR2, EDN1, SELE	1003	14	8785	3.12812	1	0.619487	71.0003
GOTERM_BP_FAT	GO:0007200~activation of phospholipase C activity by G-protein coupled receptor protein signaling pathway coupled to IP3 second messenger	4	0.200904	0.073443	GNA15, PTGER3, NMUR2, EDN1	1003	9	8785	3.89277	1	0.648975	74.791
GOTERM_BP_FAT	GO:0007204~elevation of cytosolic calcium ion concentration	7	0.351582	0.0793088	P2RX7, GNA15, PTGER3, NMUR2, LCK, EDN1, F2R	1003	27	8785	2.27078	1	0.670245	77.5234
GOTERM_BP_FAT	GO:0019932~second-messenger-mediated signaling	10	0.50226	0.0808826	ADRB3, S1PR3, GNA15, PTGER3, APOE, NMUR2, EDN1, CALCRL, EIF2AK3, PTAFR	1003	47	8785	1.86356	1	0.673	78.2075
GOTERM_BP_FAT	GO:0060193~positive regulation of lipase activity	5	0.25113	0.0824698	GNA15, PTGER3, NMUR2, EDN1, SELE	1003	15	8785	2.91957	1	0.675737	78.8774
GOTERM_BP_FAT	GO:0060191~regulation of lipase activity	6	0.301356	0.0973166	GNA15, PTGER3, NMUR2, EDN1, SELE, ANGPTL4	1003	22	8785	2.38874	1	0.717659	84.2688
GOTERM_BP_FAT	GO:0048015~phosphoinositide-mediated signaling	5	0.25113	0.23737	GNA15, PTGER3, NMUR2, EDN1, PTAFR	1003	22	8785	1.99062	1	0.925032	99.2518
Annotation Cluster 72	Enrichment Score: 1.3760919748219342
Category	Term	Count	%	PValue	Genes	List Total	Pop Hits	Pop Total	Fold Enrichment	Bonferroni	Benjamini	FDR
GOTERM_BP_FAT	GO:0051130~positive regulation of cellular component organization	17	0.853842	0.000839406	C3, ROCK2, EDN1, SNCA, EIF5A, NUSAP1, IGF2, MFGE8, CALR, DSTN, TSC1, IL1B, RANBP1, TGFB1I1, PTX3, NEFL, SELE	1003	60	8785	2.48164	0.925218	0.0416201	1.50555
GOTERM_BP_FAT	GO:0045787~positive regulation of cell cycle	9	0.452034	0.00662636	APP, CCND3, CCND2, EDN1, IL1B, NUSAP1, ASNS, IGF2, CALR	1003	26	8785	3.03187	1	0.162208	11.317
GOTERM_BP_FAT	GO:0051726~regulation of cell cycle	21	1.05475	0.0323995	CDK1, ROCK2, FAM175A, EDN1, NUSAP1, ASNS, IGF2, CALR, ITGB1, PKIA, BAK1, APP, CASP3, CCND3, CCND2, IL1B, RANBP1, HPGD, GADD45A, APBB1, ZW10	1003	114	8785	1.61345	1	0.433451	44.8426
GOTERM_BP_FAT	GO:0010564~regulation of cell cycle process	10	0.50226	0.0331118	ROCK2, EDN1, IL1B, NUSAP1, RANBP1, IGF2, CALR, APBB1, PKIA, ZW10	1003	40	8785	2.18968	1	0.437001	45.5715
GOTERM_BP_FAT	GO:0007346~regulation of mitotic cell cycle	11	0.552486	0.046945	CDK1, APP, EDN1, IL1B, NUSAP1, ASNS, RANBP1, IGF2, APBB1, PKIA, ZW10	1003	49	8785	1.96624	1	0.520517	58.0461
GOTERM_BP_FAT	GO:0010638~positive regulation of organelle organization	7	0.351582	0.0482438	ROCK2, EDN1, IL1B, NUSAP1, RANBP1, IGF2, DSTN	1003	24	8785	2.55463	1	0.525186	59.067
GOTERM_BP_FAT	GO:0051785~positive regulation of nuclear division	4	0.200904	0.073443	EDN1, IL1B, NUSAP1, IGF2	1003	9	8785	3.89277	1	0.648975	74.791
GOTERM_BP_FAT	GO:0045840~positive regulation of mitosis	4	0.200904	0.073443	EDN1, IL1B, NUSAP1, IGF2	1003	9	8785	3.89277	1	0.648975	74.791
GOTERM_BP_FAT	GO:0033043~regulation of organelle organization	14	0.703164	0.0874691	ROCK2, ELN, EDN1, SNCA, NUSAP1, IGF2, RDX, DSTN, TSC1, ARPC5L, CAPG, SCIN, IL1B, RANBP1	1003	76	8785	1.61345	1	0.690514	80.8626
GOTERM_BP_FAT	GO:0051783~regulation of nuclear division	4	0.200904	0.338234	EDN1, IL1B, NUSAP1, IGF2	1003	18	8785	1.94638	1	0.971308	99.9423
GOTERM_BP_FAT	GO:0007088~regulation of mitosis	4	0.200904	0.338234	EDN1, IL1B, NUSAP1, IGF2	1003	18	8785	1.94638	1	0.971308	99.9423
Annotation Cluster 73	Enrichment Score: 1.358651505485541
Category	Term	Count	%	PValue	Genes	List Total	Pop Hits	Pop Total	Fold Enrichment	Bonferroni	Benjamini	FDR
GOTERM_MF_FAT	GO:0031418~L-ascorbic acid binding	6	0.301356	0.0182614	PAM, LEPRE1, P4HA2, PLOD1, PLOD2, EGLN2	1013	15	9249	3.65212	1	0.322637	25.0612
GOTERM_MF_FAT	GO:0031406~carboxylic acid binding	13	0.652938	0.0306261	PAM, GCLC, SNCA, ACACA, EGLN2, SLC19A3, LEPRE1, PLOD1, P4HA2, PLOD2, ALOX5AP, NOS3, NOS2	1013	61	9249	1.9458	1	0.420623	38.5472
GOTERM_MF_FAT	GO:0016706~oxidoreductase activity, acting on paired donors, with incorporation or reduction of molecular oxygen, 2-oxoglutarate as one donor, and incorporation of one atom each of oxygen into both donors	5	0.25113	0.0454694	P4HB, P4HA2, PLOD1, PLOD2, ASPH	1013	13	9249	3.51166	1	0.502437	51.7342
INTERPRO	IPR006620:Prolyl 4-hydroxylase, alpha subunit	5	0.25113	0.0492831	LEPRE1, P4HA2, PLOD1, PLOD2, EGLN2	1235	11	9171	3.37541	1	0.843866	57.4305
SMART	SM00702:P4Hc	5	0.25113	0.0654657	LEPRE1, P4HA2, PLOD1, PLOD2, EGLN2	644	11	4364	3.08018	1	0.661527	59.3079
INTERPRO	IPR005123:Oxoglutarate and iron-dependent oxygenase	5	0.25113	0.085908	LEPRE1, P4HA2, PLOD1, PLOD2, EGLN2	1235	13	9171	2.85612	1	0.918082	78.0827
Annotation Cluster 74	Enrichment Score: 1.3546446765421596
Category	Term	Count	%	PValue	Genes	List Total	Pop Hits	Pop Total	Fold Enrichment	Bonferroni	Benjamini	FDR
GOTERM_BP_FAT	GO:0030595~leukocyte chemotaxis	6	0.301356	0.0215703	IL8, IL16, IFNG, IL1B, PF4, SCG2	1003	15	8785	3.50349	1	0.343519	32.5595
GOTERM_BP_FAT	GO:0060326~cell chemotaxis	6	0.301356	0.0215703	IL8, IL16, IFNG, IL1B, PF4, SCG2	1003	15	8785	3.50349	1	0.343519	32.5595
GOTERM_BP_FAT	GO:0030593~neutrophil chemotaxis	3	0.150678	0.185505	IL8, IFNG, IL1B	1003	7	8785	3.75374	1	0.878159	97.544
Annotation Cluster 75	Enrichment Score: 1.3504638411665624
Category	Term	Count	%	PValue	Genes	List Total	Pop Hits	Pop Total	Fold Enrichment	Bonferroni	Benjamini	FDR
GOTERM_BP_FAT	GO:0019882~antigen processing and presentation	18	0.904068	0.0100544	LOC786695, DSB, FCGRT, CALR, MGC126945, LOC616942, CD1E, BOLA-DQA1, ULBP11, ULBP3, PROCR, IFNG, JSP.1, BOLA-DYA, ULBP17, LOC790811, BOLA-DRB2, BOLA-DYB	1003	82	8785	1.92265	1	0.214865	16.6855
GOTERM_CC_FAT	GO:0042611~MHC protein complex	15	0.75339	0.0152378	LOC786695, DSB, FCGRT, MGC126945, LOC616942, CD1E, BOLA-DQA1, ULBP11, ULBP3, JSP.1, BOLA-DYA, ULBP17, LOC790811, BOLA-DRB2, BOLA-DYB	850	62	6966	1.98273	0.996843	0.174643	19.1166
INTERPRO	IPR011161:MHC class I-like antigen recognition	9	0.452034	0.0666589	ULBP11, ULBP3, PROCR, FCGRT, JSP.1, LOC790811, ULBP17, MGC126945, CD1E	1235	33	9171	2.02525	1	0.876327	68.8307
INTERPRO	IPR001039:MHC class I, alpha chain, alpha1 and alpha2	8	0.401808	0.0987718	ULBP11, ULBP3, FCGRT, JSP.1, LOC790811, ULBP17, MGC126945, CD1E	1235	30	9171	1.98024	1	0.936905	82.7506
GOTERM_CC_FAT	GO:0042612~MHC class I protein complex	9	0.452034	0.175353	ULBP11, ULBP3, FCGRT, JSP.1, LOC790811, ULBP17, LOC616942, MGC126945, CD1E	850	45	6966	1.63906	1	0.6712	93.0325
Annotation Cluster 76	Enrichment Score: 1.3390036477748652
Category	Term	Count	%	PValue	Genes	List Total	Pop Hits	Pop Total	Fold Enrichment	Bonferroni	Benjamini	FDR
INTERPRO	IPR013320:Concanavalin A-like lectin/glucanase, subgroup	12	0.602712	0.000848454	CLGN, GPR133, LGALS8, CALR3, LMAN2, CALR, PTX3, LMAN1, THBS1, PROS1, CANX, THBS3	1235	29	9171	3.07279	0.769131	0.0875472	1.42413
INTERPRO	IPR018124:Calreticulin/calnexin, conserved site	4	0.200904	0.00874468	CLGN, CALR3, CALR, CANX	1235	4	9171	7.42591	1	0.468483	13.7933
INTERPRO	IPR001580:Calreticulin/calnexin	4	0.200904	0.00874468	CLGN, CALR3, CALR, CANX	1235	4	9171	7.42591	1	0.468483	13.7933
UP_SEQ_FEATURE	repeat:2-3	4	0.200904	0.0517697	CLGN, CALR3, CALR, DPT	737	7	5635	4.36906	1	0.982441	59.5127
UP_SEQ_FEATURE	repeat:1-1	4	0.200904	0.132004	CLGN, CALR3, CALR, DPT	737	10	5635	3.05834	1	0.999072	91.0003
UP_SEQ_FEATURE	repeat:2-1	4	0.200904	0.132004	CLGN, CALR3, CALR, DPT	737	10	5635	3.05834	1	0.999072	91.0003
UP_SEQ_FEATURE	repeat:2-2	4	0.200904	0.132004	CLGN, CALR3, CALR, DPT	737	10	5635	3.05834	1	0.999072	91.0003
UP_SEQ_FEATURE	repeat:1-2	4	0.200904	0.164727	CLGN, CALR3, CALR, DPT	737	11	5635	2.78031	1	0.999599	95.3189
UP_SEQ_FEATURE	repeat:1-3	3	0.150678	0.178906	CLGN, CALR3, CALR	737	6	5635	3.82293	1	0.999719	96.5015
UP_SEQ_FEATURE	repeat:1-4	3	0.150678	0.178906	CLGN, CALR3, CALR	737	6	5635	3.82293	1	0.999719	96.5015
Annotation Cluster 77	Enrichment Score: 1.3273356230048743
Category	Term	Count	%	PValue	Genes	List Total	Pop Hits	Pop Total	Fold Enrichment	Bonferroni	Benjamini	FDR
GOTERM_BP_FAT	GO:0019882~antigen processing and presentation	18	0.904068	0.0100544	LOC786695, DSB, FCGRT, CALR, MGC126945, LOC616942, CD1E, BOLA-DQA1, ULBP11, ULBP3, PROCR, IFNG, JSP.1, BOLA-DYA, ULBP17, LOC790811, BOLA-DRB2, BOLA-DYB	1003	82	8785	1.92265	1	0.214865	16.6855
GOTERM_CC_FAT	GO:0042611~MHC protein complex	15	0.75339	0.0152378	LOC786695, DSB, FCGRT, MGC126945, LOC616942, CD1E, BOLA-DQA1, ULBP11, ULBP3, JSP.1, BOLA-DYA, ULBP17, LOC790811, BOLA-DRB2, BOLA-DYB	850	62	6966	1.98273	0.996843	0.174643	19.1166
INTERPRO	IPR003597:Immunoglobulin C1-set	13	0.652938	0.0224231	LOC786695, DSB, FCGRT, MGC126945, SIRPA, CD1E, BOLA-DQA1, JSP.1, LOC509513, BOLA-DYA, LOC790811, BOLA-DRB2, BOLA-DYB	1235	48	9171	2.01118	1	0.624365	31.8344
PIR_SUPERFAMILY	PIRSF001991:class II histocompatibility antigen	6	0.301356	0.0349472	BOLA-DQA1, LOC786695, DSB, BOLA-DYA, BOLA-DRB2, BOLA-DYB	589	13	3890	3.04819	1	0.994398	40.7445
SMART	SM00407:IGc1	13	0.652938	0.0415788	LOC786695, DSB, FCGRT, MGC126945, SIRPA, CD1E, BOLA-DQA1, JSP.1, LOC509513, BOLA-DYA, LOC790811, BOLA-DRB2, BOLA-DYB	644	48	4364	1.83527	0.999995	0.55753	43.1052
GOTERM_CC_FAT	GO:0042613~MHC class II protein complex	6	0.301356	0.0470223	BOLA-DQA1, LOC786695, DSB, BOLA-DYA, BOLA-DRB2, BOLA-DYB	850	17	6966	2.89246	1	0.3563	48.5973
SP_PIR_KEYWORDS	mhc ii	6	0.301356	0.055541	BOLA-DQA1, LOC786695, DSB, BOLA-DYA, BOLA-DRB2, BOLA-DYB	1001	16	7349	2.75312	1	0.464657	56.114
INTERPRO	IPR003006:Immunoglobulin/major histocompatibility complex, conserved site	11	0.552486	0.0722311	BOLA-DQA1, LOC786695, DSB, FCGRT, JSP.1, BOLA-DYA, SIRPA, LOC790811, MGC126945, BOLA-DRB2, BOLA-DYB	1235	45	9171	1.81522	1	0.892727	71.8303
INTERPRO	IPR000353:MHC class II, beta chain, N-terminal	4	0.200904	0.0807522	LOC786695, DSB, BOLA-DRB2, BOLA-DYB	1235	8	9171	3.71296	1	0.907802	75.8973
INTERPRO	IPR014745:MHC class II, alpha/beta chain, N-terminal	5	0.25113	0.107993	BOLA-DQA1, LOC786695, DSB, BOLA-DRB2, BOLA-DYB	1235	14	9171	2.65211	1	0.945109	85.5023
GOTERM_BP_FAT	GO:0002504~antigen processing and presentation of peptide or polysaccharide antigen via MHC class II	4	0.200904	0.305394	LOC786695, DSB, BOLA-DRB2, BOLA-DYB	1003	17	8785	2.06088	1	0.959481	99.8616
Annotation Cluster 78	Enrichment Score: 1.3163954667827065
Category	Term	Count	%	PValue	Genes	List Total	Pop Hits	Pop Total	Fold Enrichment	Bonferroni	Benjamini	FDR
GOTERM_BP_FAT	GO:0043030~regulation of macrophage activation	4	0.200904	0.0123884	SNCA, LBP, HSPD1, THBS1	1003	5	8785	7.00698	1	0.244957	20.1636
GOTERM_BP_FAT	GO:0043032~positive regulation of macrophage activation	3	0.150678	0.0360335	LBP, HSPD1, THBS1	1003	3	8785	8.75872	1	0.456256	48.4672
GOTERM_MF_FAT	GO:0043498~cell surface binding	4	0.200904	0.251822	CD2, LBP, HSPD1, THBS1	1013	16	9249	2.28258	1	0.900344	98.9341
Annotation Cluster 79	Enrichment Score: 1.2983894379243721
Category	Term	Count	%	PValue	Genes	List Total	Pop Hits	Pop Total	Fold Enrichment	Bonferroni	Benjamini	FDR
GOTERM_BP_FAT	GO:0007178~transmembrane receptor protein serine/threonine kinase signaling pathway	12	0.602712	0.00612078	TWSG1, ACVRL1, MSX1, FST, COL3A1, COL1A2, SPTBN1, SMAD1, TGFB1I1, BMPR1B, TAB1, HPGD	1003	42	8785	2.50249	1	0.15832	10.4981
GOTERM_BP_FAT	GO:0007179~transforming growth factor beta receptor signaling pathway	6	0.301356	0.0825908	ACVRL1, COL3A1, COL1A2, SMAD1, TAB1, HPGD	1003	21	8785	2.50249	1	0.674752	78.9277
GOTERM_MF_FAT	GO:0046332~SMAD binding	4	0.200904	0.251822	COL3A1, COL1A2, SMAD1, TGFB1I1	1013	16	9249	2.28258	1	0.900344	98.9341
Annotation Cluster 80	Enrichment Score: 1.2720756142799794
Category	Term	Count	%	PValue	Genes	List Total	Pop Hits	Pop Total	Fold Enrichment	Bonferroni	Benjamini	FDR
GOTERM_BP_FAT	GO:0051240~positive regulation of multicellular organismal process	25	1.25565	0.000518173	CAV1, ADORA3, TNF, SNCA, EDN1, FST, KLRK1, TLR3, ADA, FOXS1, ADRB3, GATA3, IFNG, VKORC1, IL1B, LBP, THBS1, CD276, ATP1A1, IFNAR1, CD83, P2RX7, F2, HSPD1, F2R	1003	104	8785	2.10546	0.798211	0.0292045	0.931936
GOTERM_BP_FAT	GO:0001817~regulation of cytokine production	22	1.10497	0.00151811	FCER1A, TNF, CD3E, KLRK1, CD276, TLR3, TNFRSF4, SELS, IFNAR1, CD83, S1PR3, P2RX7, APOA1, GATA3, IFNG, IL1B, UBASH3A, LBP, HSPD1, INPP5D, THBS1, F2R	1003	93	8785	2.07196	0.990827	0.0657327	2.70719
GOTERM_BP_FAT	GO:0043408~regulation of MAPKKK cascade	13	0.652938	0.00153586	FCER1A, CAV1, TNXB, TNF, EDN1, TLR3, IGF2, TLR6, TIMP2, ADRB3, P2RX7, IL1B, F2R	1003	41	8785	2.77716	0.991317	0.0646651	2.73843
GOTERM_BP_FAT	GO:0032675~regulation of interleukin-6 production	9	0.452034	0.00383546	P2RX7, TNF, IFNG, IL1B, TLR3, INPP5D, LBP, HSPD1, SELS	1003	24	8785	3.28452	0.999993	0.114044	6.70649
GOTERM_BP_FAT	GO:0046328~regulation of JNK cascade	7	0.351582	0.0158974	FCER1A, TNF, TNXB, EDN1, IL1B, TLR3, TLR6	1003	19	8785	3.2269	1	0.284205	25.1354
GOTERM_BP_FAT	GO:0043405~regulation of MAP kinase activity	12	0.602712	0.0171432	FCER1A, P2RX7, CAV1, TNF, TNXB, APOE, LAX1, EDN1, IL1B, TLR6, THBS1, TRIB2	1003	48	8785	2.18968	1	0.293008	26.8291
GOTERM_BP_FAT	GO:0070302~regulation of stress-activated protein kinase signaling pathway	7	0.351582	0.0205719	FCER1A, TNF, TNXB, EDN1, IL1B, TLR3, TLR6	1003	20	8785	3.06555	1	0.333861	31.3056
GOTERM_BP_FAT	GO:0032755~positive regulation of interleukin-6 production	6	0.301356	0.0215703	P2RX7, TNF, IL1B, TLR3, LBP, HSPD1	1003	15	8785	3.50349	1	0.343519	32.5595
GOTERM_BP_FAT	GO:0045080~positive regulation of chemokine biosynthetic process	4	0.200904	0.0226891	TNF, IFNG, IL1B, TLR3	1003	6	8785	5.83915	1	0.356087	33.9391
GOTERM_BP_FAT	GO:0010627~regulation of protein kinase cascade	19	0.954294	0.0247324	FCER1A, IL4, CAV1, TNF, ADORA3, TNXB, GOLT1B, HCLS1, EDN1, GJA1, TLR3, IGF2, TIMP2, TLR6, ADRB3, P2RX7, IFNG, IL1B, F2R	1003	97	8785	1.71563	1	0.372409	36.3901
GOTERM_BP_FAT	GO:0001819~positive regulation of cytokine production	11	0.552486	0.0275665	CD83, P2RX7, TNF, GATA3, IFNG, KLRK1, IL1B, TLR3, LBP, HSPD1, IFNAR1	1003	45	8785	2.14102	1	0.398163	39.6478
GOTERM_BP_FAT	GO:0043410~positive regulation of MAPKKK cascade	7	0.351582	0.0398951	ADRB3, P2RX7, TNF, IL1B, TLR3, IGF2, F2R	1003	23	8785	2.6657	1	0.480452	52.0716
GOTERM_BP_FAT	GO:0009615~response to virus	8	0.401808	0.040551	TNF, ISG15, KCNJ8, IFNG, TLR3, RSAD2, MX1, MX2	1003	29	8785	2.4162	1	0.480841	52.6597
GOTERM_BP_FAT	GO:0045073~regulation of chemokine biosynthetic process	4	0.200904	0.0533701	TNF, IFNG, IL1B, TLR3	1003	8	8785	4.37936	1	0.555308	62.8719
GOTERM_BP_FAT	GO:0042108~positive regulation of cytokine biosynthetic process	7	0.351582	0.0575907	FCER1A, TNF, CD3E, IFNG, CD276, IL1B, TLR3	1003	25	8785	2.45244	1	0.576811	65.7512
GOTERM_BP_FAT	GO:0042035~regulation of cytokine biosynthetic process	9	0.452034	0.0611299	FCER1A, TNF, CD3E, GATA3, IFNG, CD276, IL1B, TLR3, INPP5D	1003	38	8785	2.07443	1	0.594155	68.0017
GOTERM_BP_FAT	GO:0051090~regulation of transcription factor activity	8	0.401808	0.0852209	IL4, IRAK1, MTDH, TNF, ID2, IL1B, TLR3, ID3	1003	34	8785	2.06088	1	0.685163	79.9927
GOTERM_BP_FAT	GO:0051099~positive regulation of binding	7	0.351582	0.0916682	IL4, IRAK1, MTDH, TNF, IL1B, TLR3, EIF2AK3	1003	28	8785	2.18968	1	0.702347	82.3924
GOTERM_BP_FAT	GO:0032642~regulation of chemokine production	4	0.200904	0.0963131	TNF, IFNG, IL1B, TLR3	1003	10	8785	3.50349	1	0.716631	83.9499
GOTERM_BP_FAT	GO:0051091~positive regulation of transcription factor activity	6	0.301356	0.0973166	IL4, IRAK1, MTDH, TNF, IL1B, TLR3	1003	22	8785	2.38874	1	0.717659	84.2688
GOTERM_BP_FAT	GO:0043388~positive regulation of DNA binding	6	0.301356	0.148575	IL4, IRAK1, MTDH, TNF, IL1B, TLR3	1003	25	8785	2.10209	1	0.828179	94.5284
GOTERM_BP_FAT	GO:0051101~regulation of DNA binding	8	0.401808	0.149676	IL4, IRAK1, MTDH, TNF, ID2, IL1B, TLR3, ID3	1003	39	8785	1.79666	1	0.828464	94.6548
GOTERM_BP_FAT	GO:0051092~positive regulation of NF-kappaB transcription factor activity	5	0.25113	0.163648	IRAK1, MTDH, TNF, IL1B, TLR3	1003	19	8785	2.30493	1	0.850865	96.0373
GOTERM_BP_FAT	GO:0051098~regulation of binding	9	0.452034	0.220737	IL4, IRAK1, MTDH, TNF, ID2, IL1B, TLR3, ID3, EIF2AK3	1003	51	8785	1.54566	1	0.911924	98.8951
GOTERM_BP_FAT	GO:0070304~positive regulation of stress-activated protein kinase signaling pathway	3	0.150678	0.274151	TNF, IL1B, TLR3	1003	9	8785	2.91957	1	0.946923	99.6936
GOTERM_BP_FAT	GO:0046330~positive regulation of JNK cascade	3	0.150678	0.274151	TNF, IL1B, TLR3	1003	9	8785	2.91957	1	0.946923	99.6936
GOTERM_BP_FAT	GO:0043123~positive regulation of I-kappaB kinase/NF-kappaB cascade	7	0.351582	0.408545	TNF, GOLT1B, IL1B, TLR3, GJA1, TLR6, F2R	1003	45	8785	1.36247	1	0.985187	99.9924
GOTERM_BP_FAT	GO:0043122~regulation of I-kappaB kinase/NF-kappaB cascade	7	0.351582	0.450893	TNF, GOLT1B, IL1B, TLR3, GJA1, TLR6, F2R	1003	47	8785	1.30449	1	0.99078	99.998
GOTERM_BP_FAT	GO:0043433~negative regulation of transcription factor activity	3	0.150678	0.523612	IRAK1, ID2, ID3	1003	15	8785	1.75174	1	0.995985	99.9998
GOTERM_BP_FAT	GO:0043392~negative regulation of DNA binding	3	0.150678	0.523612	IRAK1, ID2, ID3	1003	15	8785	1.75174	1	0.995985	99.9998
GOTERM_BP_FAT	GO:0051100~negative regulation of binding	3	0.150678	0.625221	IRAK1, ID2, ID3	1003	18	8785	1.45979	1	0.998864	100
Annotation Cluster 81	Enrichment Score: 1.253670216384073
Category	Term	Count	%	PValue	Genes	List Total	Pop Hits	Pop Total	Fold Enrichment	Bonferroni	Benjamini	FDR
GOTERM_MF_FAT	GO:0004197~cysteine-type endopeptidase activity	10	0.50226	0.0303214	PIGK, CASP3, CTSK, LOC515736, CASP4, CASP9, LGMN, USP12, CTSB, CTSL1	1013	41	9249	2.2269	1	0.423441	38.2442
GOTERM_MF_FAT	GO:0008234~cysteine-type peptidase activity	14	0.703164	0.0346106	LGMN, CTSL1, CTSW, PIGK, CTSK, USP18, CASP3, CASP4, LOC515736, CASP9, ATG4A, USP12, UCHL3, CTSB	1013	69	9249	1.85253	1	0.426055	42.3843
SP_PIR_KEYWORDS	thiol protease	10	0.50226	0.165208	PIGK, CASP3, CTSK, CASP4, ATG4A, LGMN, USP12, UCHL3, CTSB, CTSL1	1001	46	7349	1.59601	1	0.763478	92.5912
Annotation Cluster 82	Enrichment Score: 1.2530824308831592
Category	Term	Count	%	PValue	Genes	List Total	Pop Hits	Pop Total	Fold Enrichment	Bonferroni	Benjamini	FDR
INTERPRO	IPR018358:Disintegrin, conserved site	5	0.25113	0.0145603	ADAM19, ADAM12, ADAMTS2, ADAMTS5, ADAMTS4	1235	8	9171	4.64119	1	0.546872	21.9528
INTERPRO	IPR001590:Peptidase M12B, ADAM/reprolysin	6	0.301356	0.015281	ADAMTS1, ADAM19, ADAM12, ADAMTS2, ADAMTS5, ADAMTS4	1235	12	9171	3.71296	1	0.553305	22.9117
INTERPRO	IPR013273:Peptidase M12B, ADAM-TS	3	0.150678	0.0494147	ADAMTS1, ADAMTS2, ADAMTS4	1235	3	9171	7.42591	1	0.838513	57.53
INTERPRO	IPR002870:Peptidase M12B, propeptide	5	0.25113	0.0662842	ADAMTS1, ADAM19, ADAM12, ADAMTS2, ADAMTS4	1235	12	9171	3.09413	1	0.879373	68.6185
UP_SEQ_FEATURE	domain:Peptidase M12B	3	0.150678	0.130172	ADAMTS2, ADAMTS5, ADAMTS4	737	5	5635	4.58752	1	0.99915	90.6718
UP_SEQ_FEATURE	domain:Disintegrin	3	0.150678	0.130172	ADAMTS2, ADAMTS5, ADAMTS4	737	5	5635	4.58752	1	0.99915	90.6718
INTERPRO	IPR010294:ADAM-TS Spacer 1	3	0.150678	0.137024	ADAMTS1, ADAMTS2, ADAMTS4	1235	5	9171	4.45555	1	0.964872	91.7115
Annotation Cluster 83	Enrichment Score: 1.2418065795782358
Category	Term	Count	%	PValue	Genes	List Total	Pop Hits	Pop Total	Fold Enrichment	Bonferroni	Benjamini	FDR
GOTERM_MF_FAT	GO:0016814~hydrolase activity, acting on carbon-nitrogen (but not peptide) bonds, in cyclic amidines	6	0.301356	0.0242238	APOBEC3B, GDA, AICDA, ADA, ADAR, ZBP1	1013	16	9249	3.42386	1	0.372127	31.877
GOTERM_MF_FAT	GO:0019239~deaminase activity	5	0.25113	0.0583156	GDA, AICDA, ADA, ADAR, ZBP1	1013	14	9249	3.26082	1	0.571152	60.9585
GOTERM_MF_FAT	GO:0004000~adenosine deaminase activity	3	0.150678	0.133215	ADA, ADAR, ZBP1	1013	6	9249	4.56515	1	0.779283	89.3318
Annotation Cluster 84	Enrichment Score: 1.2088949889352882
Category	Term	Count	%	PValue	Genes	List Total	Pop Hits	Pop Total	Fold Enrichment	Bonferroni	Benjamini	FDR
GOTERM_BP_FAT	GO:0006026~aminoglycan catabolic process	5	0.25113	0.0132244	LYVE1, CHID1, PGLYRP2, CHI3L1, PGLYRP1	1003	9	8785	4.86596	1	0.25762	21.3757
GOTERM_BP_FAT	GO:0000272~polysaccharide catabolic process	5	0.25113	0.0393344	LYVE1, CHID1, PGLYRP2, CHI3L1, PGLYRP1	1003	12	8785	3.64947	1	0.479101	51.5635
GOTERM_BP_FAT	GO:0006022~aminoglycan metabolic process	7	0.351582	0.0482438	LYVE1, CHID1, BGN, PGLYRP2, CHI3L1, PGLYRP1, DCN	1003	24	8785	2.55463	1	0.525186	59.067
GOTERM_BP_FAT	GO:0006027~glycosaminoglycan catabolic process	3	0.150678	0.102828	LYVE1, PGLYRP2, PGLYRP1	1003	5	8785	5.25523	1	0.728499	85.9165
GOTERM_BP_FAT	GO:0005976~polysaccharide metabolic process	10	0.50226	0.132135	LYVE1, CHID1, PPP1R3B, BGN, GNE, PGLYRP2, CHI3L1, PGLYRP1, DCN, CERCAM	1003	52	8785	1.68437	1	0.798714	92.2703
GOTERM_BP_FAT	GO:0030203~glycosaminoglycan metabolic process	5	0.25113	0.163648	LYVE1, BGN, PGLYRP2, PGLYRP1, DCN	1003	19	8785	2.30493	1	0.850865	96.0373
Annotation Cluster 85	Enrichment Score: 1.198255887978041
Category	Term	Count	%	PValue	Genes	List Total	Pop Hits	Pop Total	Fold Enrichment	Bonferroni	Benjamini	FDR
GOTERM_BP_FAT	GO:0048872~homeostasis of number of cells	15	0.75339	0.0047204	EPAS1, EPB42, HCLS1, SFXN1, TIMP1, BAK1, P2RX7, CASP3, ID2, IFNG, TCEA1, FAS, IKBKB, CD7, F2R	1003	58	8785	2.26519	1	0.128762	8.19234
GOTERM_BP_FAT	GO:0030218~erythrocyte differentiation	7	0.351582	0.0398951	ID2, EPAS1, EPB42, HCLS1, TCEA1, SFXN1, TIMP1	1003	23	8785	2.6657	1	0.480452	52.0716
GOTERM_BP_FAT	GO:0034101~erythrocyte homeostasis	7	0.351582	0.0575907	ID2, EPAS1, EPB42, HCLS1, TCEA1, SFXN1, TIMP1	1003	25	8785	2.45244	1	0.576811	65.7512
GOTERM_BP_FAT	GO:0030099~myeloid cell differentiation	8	0.401808	0.196737	TNF, ID2, EPAS1, EPB42, HCLS1, TCEA1, SFXN1, TIMP1	1003	42	8785	1.66833	1	0.8888	98.0889
GOTERM_BP_FAT	GO:0048469~cell maturation	5	0.25113	0.478172	EPAS1, EPB42, GJA1, KDR, TIMP1	1003	31	8785	1.4127	1	0.993152	99.9992
Annotation Cluster 86	Enrichment Score: 1.196395866510172
Category	Term	Count	%	PValue	Genes	List Total	Pop Hits	Pop Total	Fold Enrichment	Bonferroni	Benjamini	FDR
GOTERM_BP_FAT	GO:0051050~positive regulation of transport	20	1.00452	0.000477998	FCER1A, RBP4, TNF, ADORA3, C3, SNCA, EDN1, NFKBIA, MFGE8, CALR, BAK1, KCNN4, P2RX7, APOE, IFNG, F2, SCIN, PTX3, SELE, SERP1	1003	74	8785	2.36722	0.771544	0.0279932	0.859977
GOTERM_BP_FAT	GO:0051047~positive regulation of secretion	11	0.552486	0.00218023	FCER1A, KCNN4, RBP4, P2RX7, ADORA3, TNF, SCIN, IFNG, SNCA, EDN1, SERP1	1003	32	8785	3.01081	0.998817	0.0779942	3.86611
GOTERM_BP_FAT	GO:0051046~regulation of secretion	18	0.904068	0.00250505	FCER1A, RBP4, ADORA3, TNF, EDN1, SNCA, TNFRSF4, ADA, GCG, KCNN4, P2RX7, APOA1, IFNG, SCIN, IL1B, NOS2, RAB26, SERP1	1003	72	8785	2.18968	0.999567	0.0842526	4.42986
GOTERM_BP_FAT	GO:0050796~regulation of insulin secretion	7	0.351582	0.00632385	GCG, RBP4, TNF, IFNG, IL1B, NOS2, SERP1	1003	16	8785	3.83194	1	0.16179	10.8278
GOTERM_BP_FAT	GO:0002791~regulation of peptide secretion	7	0.351582	0.0120115	GCG, RBP4, TNF, IFNG, IL1B, NOS2, SERP1	1003	18	8785	3.40617	1	0.244648	19.6113
GOTERM_BP_FAT	GO:0032652~regulation of interleukin-1 production	5	0.25113	0.0132244	S1PR3, P2RX7, APOA1, IFNG, F2R	1003	9	8785	4.86596	1	0.25762	21.3757
GOTERM_BP_FAT	GO:0032651~regulation of interleukin-1 beta production	5	0.25113	0.0132244	S1PR3, P2RX7, APOA1, IFNG, F2R	1003	9	8785	4.86596	1	0.25762	21.3757
GOTERM_BP_FAT	GO:0051051~negative regulation of transport	12	0.602712	0.0199003	GRB10, TNF, APOA1, IL1B, NFKBIA, NOS3, ITGB3, THBS1, TNFRSF4, PKIA, ADA, TRAT1	1003	49	8785	2.14499	1	0.328268	30.4496
GOTERM_BP_FAT	GO:0060341~regulation of cellular localization	18	0.904068	0.0296271	FCER1A, RBP4, ADORA3, TNF, SNCA, EDN1, NFKBIA, PKIA, TNFRSF4, GCG, KCNN4, P2RX7, APOA1, IFNG, IL1B, NOS2, RAB26, SERP1	1003	92	8785	1.71366	1	0.410026	41.9168
GOTERM_BP_FAT	GO:0050708~regulation of protein secretion	7	0.351582	0.0482438	KCNN4, RBP4, P2RX7, TNF, APOA1, IFNG, TNFRSF4	1003	24	8785	2.55463	1	0.525186	59.067
GOTERM_BP_FAT	GO:0050714~positive regulation of protein secretion	5	0.25113	0.0518317	KCNN4, RBP4, P2RX7, TNF, IFNG	1003	13	8785	3.36874	1	0.546228	61.7667
GOTERM_BP_FAT	GO:0050707~regulation of cytokine secretion	5	0.25113	0.0518317	P2RX7, TNF, APOA1, IFNG, TNFRSF4	1003	13	8785	3.36874	1	0.546228	61.7667
GOTERM_BP_FAT	GO:0051224~negative regulation of protein transport	5	0.25113	0.0662299	TNF, APOA1, NFKBIA, TNFRSF4, PKIA	1003	14	8785	3.12812	1	0.619487	71.0003
GOTERM_BP_FAT	GO:0002637~regulation of immunoglobulin production	5	0.25113	0.0824698	IL4, RBP4, CD37, TNF, IFNG	1003	15	8785	2.91957	1	0.675737	78.8774
GOTERM_BP_FAT	GO:0051223~regulation of protein transport	9	0.452034	0.0884717	KCNN4, RBP4, P2RX7, TNF, APOA1, IFNG, NFKBIA, TNFRSF4, PKIA	1003	41	8785	1.92265	1	0.693342	81.2388
GOTERM_BP_FAT	GO:0050706~regulation of interleukin-1 beta secretion	3	0.150678	0.102828	P2RX7, APOA1, IFNG	1003	5	8785	5.25523	1	0.728499	85.9165
GOTERM_BP_FAT	GO:0050704~regulation of interleukin-1 secretion	3	0.150678	0.102828	P2RX7, APOA1, IFNG	1003	5	8785	5.25523	1	0.728499	85.9165
GOTERM_BP_FAT	GO:0002700~regulation of production of molecular mediator of immune response	6	0.301356	0.130378	IL4, RBP4, CD37, TNF, APOA1, IFNG	1003	24	8785	2.18968	1	0.795251	91.9828
GOTERM_BP_FAT	GO:0070201~regulation of establishment of protein localization	9	0.452034	0.134268	KCNN4, RBP4, P2RX7, TNF, APOA1, IFNG, NFKBIA, TNFRSF4, PKIA	1003	45	8785	1.75174	1	0.801906	92.6065
GOTERM_BP_FAT	GO:0050710~negative regulation of cytokine secretion	3	0.150678	0.185505	TNF, APOA1, TNFRSF4	1003	7	8785	3.75374	1	0.878159	97.544
GOTERM_BP_FAT	GO:0051048~negative regulation of secretion	5	0.25113	0.211906	TNF, APOA1, IL1B, TNFRSF4, ADA	1003	21	8785	2.08541	1	0.903142	98.6457
GOTERM_BP_FAT	GO:0051222~positive regulation of protein transport	5	0.25113	0.211906	KCNN4, RBP4, P2RX7, TNF, IFNG	1003	21	8785	2.08541	1	0.903142	98.6457
GOTERM_BP_FAT	GO:0050715~positive regulation of cytokine secretion	3	0.150678	0.22955	P2RX7, TNF, IFNG	1003	8	8785	3.28452	1	0.91926	99.1003
GOTERM_BP_FAT	GO:0032880~regulation of protein localization	9	0.452034	0.253343	KCNN4, RBP4, P2RX7, TNF, APOA1, IFNG, NFKBIA, TNFRSF4, PKIA	1003	53	8785	1.48733	1	0.93449	99.4895
GOTERM_BP_FAT	GO:0007586~digestion	5	0.25113	0.263497	KCNN4, RBP4, P2RX7, LYZ2, ACO1	1003	23	8785	1.90407	1	0.940849	99.6014
GOTERM_BP_FAT	GO:0050709~negative regulation of protein secretion	3	0.150678	0.274151	TNF, APOA1, TNFRSF4	1003	9	8785	2.91957	1	0.946923	99.6936
GOTERM_BP_FAT	GO:0042306~regulation of protein import into nucleus	3	0.150678	0.523612	TNF, NFKBIA, PKIA	1003	15	8785	1.75174	1	0.995985	99.9998
GOTERM_BP_FAT	GO:0033157~regulation of intracellular protein transport	3	0.150678	0.593333	TNF, NFKBIA, PKIA	1003	17	8785	1.54566	1	0.998164	100
GOTERM_BP_FAT	GO:0046822~regulation of nucleocytoplasmic transport	3	0.150678	0.625221	TNF, NFKBIA, PKIA	1003	18	8785	1.45979	1	0.998864	100
GOTERM_BP_FAT	GO:0032386~regulation of intracellular transport	3	0.150678	0.796105	TNF, NFKBIA, PKIA	1003	25	8785	1.05105	1	0.999941	100
Annotation Cluster 87	Enrichment Score: 1.1895566339681027
Category	Term	Count	%	PValue	Genes	List Total	Pop Hits	Pop Total	Fold Enrichment	Bonferroni	Benjamini	FDR
GOTERM_BP_FAT	GO:0018149~peptide cross-linking	8	0.401808	0.00170131	LOC511937, BGN, EPB42, F13A1, COL3A1, TGM3, DCN, THBS1	1003	17	8785	4.12175	0.994795	0.0677069	3.02915
GOTERM_MF_FAT	GO:0016755~transferase activity, transferring amino-acyl groups	5	0.25113	0.0728808	QPCT, EPB42, F13A1, TGM3, GGT1	1013	15	9249	3.04344	1	0.623729	69.4117
INTERPRO	IPR013808:Transglutaminase, conserved site	3	0.150678	0.187811	EPB42, F13A1, TGM3	1235	6	9171	3.71296	1	0.984661	97.026
INTERPRO	IPR001102:Transglutaminase, N-terminal	3	0.150678	0.187811	EPB42, F13A1, TGM3	1235	6	9171	3.71296	1	0.984661	97.026
GOTERM_MF_FAT	GO:0003810~protein-glutamine gamma-glutamyltransferase activity	3	0.150678	0.257857	EPB42, F13A1, TGM3	1013	9	9249	3.04344	1	0.904662	99.061
Annotation Cluster 88	Enrichment Score: 1.180958623082359
Category	Term	Count	%	PValue	Genes	List Total	Pop Hits	Pop Total	Fold Enrichment	Bonferroni	Benjamini	FDR
GOTERM_BP_FAT	GO:0002757~immune response-activating signal transduction	8	0.401808	0.0281759	IRAK1, THEMIS, LAX1, LCK, KLRK1, NFKBIA, CACNB3, HSPD1	1003	27	8785	2.59518	1	0.403168	40.3274
GOTERM_BP_FAT	GO:0045088~regulation of innate immune response	8	0.401808	0.0281759	IRAK1, CRTAM, A2M, SH2D1A, KLRK1, NFKBIA, LBP, HSPD1	1003	27	8785	2.59518	1	0.403168	40.3274
GOTERM_BP_FAT	GO:0002764~immune response-regulating signal transduction	8	0.401808	0.040551	IRAK1, THEMIS, LAX1, LCK, KLRK1, NFKBIA, CACNB3, HSPD1	1003	29	8785	2.4162	1	0.480841	52.6597
GOTERM_BP_FAT	GO:0045089~positive regulation of innate immune response	7	0.351582	0.0482438	IRAK1, CRTAM, SH2D1A, KLRK1, NFKBIA, LBP, HSPD1	1003	24	8785	2.55463	1	0.525186	59.067
GOTERM_BP_FAT	GO:0002218~activation of innate immune response	4	0.200904	0.073443	IRAK1, KLRK1, NFKBIA, HSPD1	1003	9	8785	3.89277	1	0.648975	74.791
GOTERM_BP_FAT	GO:0002758~innate immune response-activating signal transduction	4	0.200904	0.073443	IRAK1, KLRK1, NFKBIA, HSPD1	1003	9	8785	3.89277	1	0.648975	74.791
GOTERM_BP_FAT	GO:0002224~toll-like receptor signaling pathway	3	0.150678	0.185505	IRAK1, NFKBIA, HSPD1	1003	7	8785	3.75374	1	0.878159	97.544
GOTERM_BP_FAT	GO:0002221~pattern recognition receptor signaling pathway	3	0.150678	0.22955	IRAK1, NFKBIA, HSPD1	1003	8	8785	3.28452	1	0.91926	99.1003
Annotation Cluster 89	Enrichment Score: 1.1792369776570855
Category	Term	Count	%	PValue	Genes	List Total	Pop Hits	Pop Total	Fold Enrichment	Bonferroni	Benjamini	FDR
GOTERM_BP_FAT	GO:0032269~negative regulation of cellular protein metabolic process	11	0.552486	0.0414257	BAK1, SRP14, CAV1, A2M, GCLC, TSC1, PAIP2, SNCA, ITGB3, THBS1, EIF2AK3	1003	48	8785	2.00721	1	0.486533	53.4333
GOTERM_BP_FAT	GO:0051248~negative regulation of protein metabolic process	11	0.552486	0.046945	BAK1, SRP14, CAV1, A2M, GCLC, TSC1, PAIP2, SNCA, ITGB3, THBS1, EIF2AK3	1003	49	8785	1.96624	1	0.520517	58.0461
GOTERM_BP_FAT	GO:0017148~negative regulation of translation	4	0.200904	0.149084	SRP14, TSC1, PAIP2, EIF2AK3	1003	12	8785	2.91957	1	0.828229	94.5871
Annotation Cluster 90	Enrichment Score: 1.1775765320830085
Category	Term	Count	%	PValue	Genes	List Total	Pop Hits	Pop Total	Fold Enrichment	Bonferroni	Benjamini	FDR
SP_PIR_KEYWORDS	endonexin fold	4	0.200904	0.0202913	LOC511937, ANXA11, ANXA4, ANXA2	1001	5	7349	5.87333	0.999967	0.243225	25.5809
GOTERM_MF_FAT	GO:0005544~calcium-dependent phospholipid binding	5	0.25113	0.0343771	ANXA6, LOC511937, ANXA11, ANXA4, ANXA2	1013	12	9249	3.80429	1	0.429314	42.1658
UP_SEQ_FEATURE	repeat:Annexin 1	5	0.25113	0.0447413	ANXA6, LOC511937, ANXA11, ANXA4, ANXA2	737	11	5635	3.47539	1	0.984652	54.0938
UP_SEQ_FEATURE	repeat:Annexin 4	5	0.25113	0.0447413	ANXA6, LOC511937, ANXA11, ANXA4, ANXA2	737	11	5635	3.47539	1	0.984652	54.0938
UP_SEQ_FEATURE	repeat:Annexin 3	5	0.25113	0.0447413	ANXA6, LOC511937, ANXA11, ANXA4, ANXA2	737	11	5635	3.47539	1	0.984652	54.0938
UP_SEQ_FEATURE	repeat:Annexin 2	5	0.25113	0.0447413	ANXA6, LOC511937, ANXA11, ANXA4, ANXA2	737	11	5635	3.47539	1	0.984652	54.0938
INTERPRO	IPR018502:Annexin repeat	5	0.25113	0.0492831	ANXA6, LOC511937, ANXA11, ANXA4, ANXA2	1235	11	9171	3.37541	1	0.843866	57.4305
INTERPRO	IPR001464:Annexin	5	0.25113	0.0492831	ANXA6, LOC511937, ANXA11, ANXA4, ANXA2	1235	11	9171	3.37541	1	0.843866	57.4305
INTERPRO	IPR018252:Annexin repeat, conserved site	5	0.25113	0.0492831	ANXA6, LOC511937, ANXA11, ANXA4, ANXA2	1235	11	9171	3.37541	1	0.843866	57.4305
SP_PIR_KEYWORDS	calcium/phospholipid-binding	5	0.25113	0.05105	ANXA6, LOC511937, ANXA11, ANXA4, ANXA2	1001	11	7349	3.33712	1	0.443287	53.0085
SP_PIR_KEYWORDS	annexin	5	0.25113	0.05105	ANXA6, LOC511937, ANXA11, ANXA4, ANXA2	1001	11	7349	3.33712	1	0.443287	53.0085
SMART	SM00335:ANX	5	0.25113	0.0654657	ANXA6, LOC511937, ANXA11, ANXA4, ANXA2	644	11	4364	3.08018	1	0.661527	59.3079
SP_PIR_KEYWORDS	phospholipid binding	4	0.200904	0.144881	LOC511937, ANXA11, ANXA4, ANXA2	1001	10	7349	2.93666	1	0.736671	89.5207
GOTERM_MF_FAT	GO:0005543~phospholipid binding	13	0.652938	0.181712	SH3PXD2B, LOC511937, MFGE8, ANXA4, ANXA2, ANXA6, APOA1, APOE, SCIN, ANXA11, PTAFR, SNX10, SNX20	1013	82	9249	1.44749	1	0.836462	95.6682
PIR_SUPERFAMILY	PIRSF002359:annexin I	3	0.150678	0.286617	LOC511937, ANXA4, ANXA2	589	7	3890	2.83046	1	1	99.3046
SP_PIR_KEYWORDS	duplication	12	0.602712	0.334629	GCG, P4HB, LOC511937, IL2RA, PDIA3, F2, TEK, ANXA11, LTF, TIE1, ANXA4, ANXA2	1001	69	7349	1.27681	1	0.90258	99.7182
Annotation Cluster 91	Enrichment Score: 1.1642450132711717
Category	Term	Count	%	PValue	Genes	List Total	Pop Hits	Pop Total	Fold Enrichment	Bonferroni	Benjamini	FDR
GOTERM_MF_FAT	GO:0005525~GTP binding	50	2.5113	0.000896669	LOC781710, HBS1L, RAB1A, ARHGAP5, DIRAS2, SRPR, NMUR2, LOC530077, RAB6B, RAB26, MX1, RAB27B, SAR1B, SAR1A, MX2, TUBB3, RAB27A, GBP7, ARL1, GBP5, RAB4A, RAB4B, IFI47, GEM, RASL12, RND2, AMIGO3, RRAS2, GUCY1B3, GBP4, LRRK1, LOC782954, RASD2, FKBP4, LOC512486, LOC507055, LOC514143, LOC781675, RAB40B, RHOBTB2, EHD2, EHD3, RAB8B, GNAO1, GIMAP6, EEF1A2, GIMAP8, RAB7L1, DOCK6, RAB30, LOC785867, RAB35	1013	286	9249	1.59621	0.565811	0.0408558	1.39442
GOTERM_MF_FAT	GO:0019001~guanyl nucleotide binding	51	2.56153	0.00110226	GNA15, LOC781710, HBS1L, RAB1A, ARHGAP5, DIRAS2, SRPR, NMUR2, LOC530077, RAB6B, RAB26, MX1, RAB27B, SAR1B, SAR1A, MX2, TUBB3, RAB27A, GBP7, ARL1, GBP5, RAB4A, RAB4B, IFI47, GEM, RASL12, RND2, AMIGO3, RRAS2, GUCY1B3, GBP4, LRRK1, LOC782954, RASD2, FKBP4, LOC512486, LOC507055, LOC514143, LOC781675, RAB40B, RHOBTB2, EHD2, EHD3, RAB8B, GNAO1, GIMAP6, EEF1A2, GIMAP8, RAB7L1, DOCK6, RAB30, LOC785867, R…	1013	296	9249	1.57313	0.641442	0.0436145	1.71156
GOTERM_MF_FAT	GO:0032561~guanyl ribonucleotide binding	50	2.5113	0.00153293	LOC781710, HBS1L, RAB1A, ARHGAP5, DIRAS2, SRPR, NMUR2, LOC530077, RAB6B, RAB26, MX1, RAB27B, SAR1B, SAR1A, MX2, TUBB3, RAB27A, GBP7, ARL1, GBP5, RAB4A, RAB4B, IFI47, GEM, RASL12, RND2, AMIGO3, RRAS2, GUCY1B3, GBP4, LRRK1, LOC782954, RASD2, FKBP4, LOC512486, LOC507055, LOC514143, LOC781675, RAB40B, RHOBTB2, EHD2, EHD3, RAB8B, GNAO1, GIMAP6, EEF1A2, GIMAP8, RAB7L1, DOCK6, RAB30, LOC785867, RAB35	1013	293	9249	1.55807	0.759904	0.0554708	2.37281
GOTERM_MF_FAT	GO:0003924~GTPase activity	18	0.904068	0.0136259	GBP7, LOC781710, GBP5, EEF1A2, LOC512486, HBS1L, LOC514143, LOC507055, LOC781675, RASL12, DIRAS2, SRPR, MX1, GBP4, MX2, LOC782954, EHD2, TUBB3, EHD3	1013	88	9249	1.86756	0.999997	0.285211	19.3265
GOTERM_BP_FAT	GO:0007264~small GTPase mediated signal transduction	30	1.50678	0.0168701	RAB1A, RAB40B, ARHGAP5, DIRAS2, APOA1, RASGRP4, APOE, RHOBTB2, RAB6B, RAB26, RAB27B, RAB27A, ARL1, RAB8B, RALBP1, RAB4A, RAB4B, GEM, RASL12, RAB7L1, RND2, CDH13, DOK1, RAB30, LOC785867, RAB35, RRAS2, PECAM1, COL1A2, LRRK1, RASD2	1003	170	8785	1.54566	1	0.292242	26.4609
INTERPRO	IPR003579:Ras small GTPase, Rab type	12	0.602712	0.0169014	RAB8B, RAB30, RAB35, RAB4A, RAB4B, RAB6B, RAB26, RAB7L1, RAB27B, RAB1A, RAB40B, RAB27A	1235	41	9171	2.17344	1	0.579297	25.0275
SMART	SM00175:RAB	12	0.602712	0.030957	RAB8B, RAB30, RAB35, RAB4A, RAB4B, RAB6B, RAB26, RAB7L1, RAB27B, RAB1A, RAB40B, RAB27A	644	41	4364	1.98334	0.999883	0.529853	34.1375
INTERPRO	IPR013753:Ras	17	0.853842	0.12708	RAB8B, RAB4A, RAB4B, GEM, RAB7L1, RASL12, RAB40B, RAB1A, RAB30, LOC785867, RRAS2, RAB35, RHOBTB2, RAB6B, RAB26, RAB27B, RASD2, RAB27A	1235	88	9171	1.43455	1	0.959858	89.941
INTERPRO	IPR005225:Small GTP-binding protein	20	1.00452	0.189008	ARL1, RAB8B, RAB4A, RAB4B, GEM, RASL12, RAB7L1, RAB40B, RAB1A, RAB30, LOC785867, RRAS2, RAB35, RHOBTB2, RAB6B, RAB26, SAR1B, RAB27B, SAR1A, RASD2, RAB27A	1235	114	9171	1.30279	1	0.984371	97.0992
INTERPRO	IPR001806:Ras GTPase	17	0.853842	0.214406	RAB8B, RAB4A, RAB4B, GEM, RAB7L1, RASL12, RAB40B, RAB1A, RAB30, LOC785867, RRAS2, RAB35, RHOBTB2, RAB6B, RAB26, RAB27B, RASD2, RAB27A	1235	96	9171	1.31501	1	0.991225	98.3056
SP_PIR_KEYWORDS	gtp-binding	31	1.55701	0.394545	HBS1L, RAB1A, RAB40B, SRPR, RHOBTB2, RAB6B, RAB26, RAB27B, SAR1B, MX1, SAR1A, MX2, TUBB3, RAB27A, ARL1, GNAO1, RAB8B, GIMAP6, EEF1A2, RAB4A, RAB4B, GEM, RAB7L1, RASL12, AMIGO3, RAB30, LOC785867, RAB35, RRAS2, GUCY1B3, LOC782954, RASD2	1001	208	7349	1.09419	1	0.925874	99.9277
PIR_SUPERFAMILY	PIRSF001710:Ras-related protein Rab	4	0.200904	0.400891	RAB35, RAB4A, RAB27B, RAB27A	589	15	3890	1.76118	1	1	99.9467
UP_SEQ_FEATURE	nucleotide phosphate-binding region:GTP	19	0.954294	0.447171	ARL1, RAB8B, GNAO1, GIMAP6, EEF1A2, RAB4A, HBS1L, RASL12, RAB30, SRPR, RAB6B, RAB26, SAR1B, RAB27B, MX1, MX2, SAR1A, LOC782954, TUBB3	737	131	5635	1.10894	1	0.999999	99.9958
UP_SEQ_FEATURE	lipid moiety-binding region:S-geranylgeranyl cysteine	7	0.351582	0.52205	RAB8B, RAB30, RAB4A, RAB6B, RAB26, RAB27B, GNG5	737	44	5635	1.21639	1	1	99.9996
UP_SEQ_FEATURE	short sequence motif:Effector region	6	0.301356	0.565572	RAB8B, RAB30, RAB4A, RAB6B, RAB26, RAB27B	737	38	5635	1.20724	1	1	99.9999
SP_PIR_KEYWORDS	prenylation	7	0.351582	0.865556	RAB8B, RAB30, RAB4A, RAB6B, RAB26, RAB27B, GNG5	1001	62	7349	0.828897	1	0.998514	100
SP_PIR_KEYWORDS	methylation	11	0.552486	0.951364	ACTG2, TF, RAB8B, RAB30, ACTA2, EEF1A2, RAB4A, RAB6B, LOC788250, RAB27B, GNG5, LOC782954	1001	112	7349	0.721056	1	0.999823	100
Annotation Cluster 92	Enrichment Score: 1.1491925716333709
Category	Term	Count	%	PValue	Genes	List Total	Pop Hits	Pop Total	Fold Enrichment	Bonferroni	Benjamini	FDR
INTERPRO	IPR004031:PMP-22/EMP/MP20/Claudin	8	0.401808	0.0123494	CLDN4, CLDN3, CLDN5, CLDN11, NKG7, EMP3, EMP2, CLDN15	1235	20	9171	2.97036	1	0.522888	18.9404
GOTERM_CC_FAT	GO:0005911~cell-cell junction	20	1.00452	0.0154109	PRKCZ, F11R, CLDN4, CLDN3, COL13A1, CLDN5, GJA1, PCDH12, CLDN11, GJA4, CDH5, VCL, GJC1, CLDN15, TJP1, P2RX7, CGN, ITGA5, DLG5, TJP2	850	93	6966	1.76243	0.997044	0.17128	19.3128
INTERPRO	IPR017974:Claudin, conserved site	6	0.301356	0.041079	TMEM37, CLDN4, CLDN3, CLDN5, CLDN11, CLDN15	1235	15	9171	2.97036	1	0.800076	50.7783
GOTERM_CC_FAT	GO:0070160~occluding junction	10	0.50226	0.05479	PRKCZ, F11R, TJP1, CLDN4, CLDN3, CLDN5, CLDN11, TJP2, CDH5, CLDN15	850	41	6966	1.99885	1	0.388236	54.0935
GOTERM_CC_FAT	GO:0005923~tight junction	10	0.50226	0.05479	PRKCZ, F11R, TJP1, CLDN4, CLDN3, CLDN5, CLDN11, TJP2, CDH5, CLDN15	850	41	6966	1.99885	1	0.388236	54.0935
GOTERM_CC_FAT	GO:0016327~apicolateral plasma membrane	12	0.602712	0.0722646	PRKCZ, F11R, TJP1, CLDN4, CLDN3, CGN, CLDN5, CLDN11, TJP2, CDH5, FZD6, CLDN15	850	56	6966	1.75613	1	0.457455	64.5269
UP_SEQ_FEATURE	region of interest:Interactions with TJP1, TJP2 and TJP3	3	0.150678	0.085341	CLDN4, CLDN3, CLDN5	737	4	5635	5.7344	1	0.993826	78.0697
INTERPRO	IPR006187:Claudin	5	0.25113	0.085908	CLDN4, CLDN3, CLDN5, CLDN11, CLDN15	1235	13	9171	2.85612	1	0.918082	78.0827
GOTERM_CC_FAT	GO:0030054~cell junction	32	1.60723	0.102127	PRKCZ, ACHE, CLDN4, CLDN3, CLDN5, GJA1, RPS6KB1, CLDN11, GJA4, CDH5, GJC1, CLDN15, VCL, RABAC1, PTK2, COL17A1, MS4A1, DLG5, SLC30A3, GABRD, F11R, COL13A1, FBLIM1, PCDH12, CBLN3, SDC1, P2RX7, TJP1, ITGA5, CGN, TGFB1I1, TJP2	850	202	6966	1.29826	1	0.520256	77.4282
GOTERM_CC_FAT	GO:0043296~apical junction complex	11	0.552486	0.125767	PRKCZ, F11R, TJP1, CLDN4, CLDN3, CGN, CLDN5, CLDN11, TJP2, CDH5, CLDN15	850	55	6966	1.63906	1	0.562327	84.3879
SP_PIR_KEYWORDS	Tight junction	6	0.301356	0.147049	F11R, CLDN4, CLDN3, CLDN5, CLDN11, CLDN15	1001	21	7349	2.09762	1	0.736418	89.8971
KEGG_PATHWAY	bta04530:Tight junction	15	0.75339	0.690092	PRKCZ, F11R, CLDN4, CLDN3, HCLS1, CLDN5, PRKCH, CLDN11, CLDN15, TJP1, CGN, RRAS2, JAM3, TJP2, MYH10	624	122	4940	0.973361	1	0.93822	99.9999
Annotation Cluster 93	Enrichment Score: 1.1487020078312036
Category	Term	Count	%	PValue	Genes	List Total	Pop Hits	Pop Total	Fold Enrichment	Bonferroni	Benjamini	FDR
INTERPRO	IPR001134:Netrin domain	7	0.351582	0.00993087	SFRP1, C3, SFRP2, SFRP4, TIMP2, PCOLCE2, TIMP1	1235	15	9171	3.46543	1	0.49815	15.52
INTERPRO	IPR018933:Netrin module, non-TIMP type	5	0.25113	0.0350009	SFRP1, C3, SFRP2, SFRP4, PCOLCE2	1235	10	9171	3.71296	1	0.768921	45.2318
INTERPRO	IPR015526:Frizzled related	5	0.25113	0.0350009	FZD10, SFRP1, SFRP2, SFRP4, FZD6	1235	10	9171	3.71296	1	0.768921	45.2318
SMART	SM00643:C345C	5	0.25113	0.0469783	SFRP1, C3, SFRP2, SFRP4, PCOLCE2	644	10	4364	3.3882	0.999999	0.557435	47.2176
INTERPRO	IPR000024:Frizzled cysteine-rich domain	4	0.200904	0.0807522	FZD10, SFRP1, SFRP2, SFRP4	1235	8	9171	3.71296	1	0.907802	75.8973
SP_PIR_KEYWORDS	wnt signaling pathway	8	0.401808	0.297798	WNT10A, FZD10, SFRP1, SFRP2, SFRP4, MESDC2, TGFB1I1, FZD6	1001	40	7349	1.46833	1	0.882639	99.3875
GOTERM_BP_FAT	GO:0016055~Wnt receptor signaling pathway	7	0.351582	0.662168	WNT10A, FZD10, SFRP1, SFRP2, SFRP4, TGFB1I1, FZD6	1003	58	8785	1.05709	1	0.999314	100
Annotation Cluster 94	Enrichment Score: 1.1404286949565317
Category	Term	Count	%	PValue	Genes	List Total	Pop Hits	Pop Total	Fold Enrichment	Bonferroni	Benjamini	FDR
GOTERM_BP_FAT	GO:0002684~positive regulation of immune system process	34	1.70768	8.6687e-06	C7, ADORA3, C3, F2RL1, KLRK1, NFKBIA, CACNB3, LOC781004, ADA, AQP3, SH2D1A, FCN2, IFNG, CFH, IL1B, CD4, INPP5D, LBP, THBS1, IL4, FCER1A, IRAK1, CRTAM, THEMIS, CD3E, CFB, CD276, IDO1, TRAT1, CD83, CD37, P2RX7, LAX1, LCK, HSPD1	1003	132	8785	2.25603	0.0264139	0.00133756	0.0156586
GOTERM_BP_FAT	GO:0050865~regulation of cell activation	21	1.05475	0.00206881	FCER1A, IL4, SELP, ADORA3, CD3E, SNCA, CD276, ADA, CD83, CASP3, APOE, LAX1, LCK, IFNG, IL1B, CD4, HSPD1, FAS, INPP5D, LBP, THBS1	1003	89	8785	2.06667	0.99833	0.0759158	3.67201
GOTERM_BP_FAT	GO:0002694~regulation of leukocyte activation	19	0.954294	0.00655747	FCER1A, IL4, ADORA3, CD3E, SNCA, CD276, ADA, CD83, CASP3, LAX1, LCK, IFNG, IL1B, CD4, HSPD1, FAS, INPP5D, LBP, THBS1	1003	85	8785	1.95783	1	0.161937	11.2058
GOTERM_BP_FAT	GO:0050867~positive regulation of cell activation	16	0.803616	0.00852665	FCER1A, IL4, SELP, ADORA3, CD3E, CD276, ADA, CD83, IFNG, LCK, IL1B, CD4, HSPD1, INPP5D, LBP, THBS1	1003	68	8785	2.06088	1	0.189308	14.3321
GOTERM_BP_FAT	GO:0002696~positive regulation of leukocyte activation	15	0.75339	0.0152378	FCER1A, IL4, ADORA3, CD3E, CD276, ADA, CD83, IFNG, LCK, IL1B, CD4, HSPD1, INPP5D, LBP, THBS1	1003	66	8785	1.99062	1	0.278924	24.2238
GOTERM_BP_FAT	GO:0042108~positive regulation of cytokine biosynthetic process	7	0.351582	0.0575907	FCER1A, TNF, CD3E, IFNG, CD276, IL1B, TLR3	1003	25	8785	2.45244	1	0.576811	65.7512
GOTERM_BP_FAT	GO:0042035~regulation of cytokine biosynthetic process	9	0.452034	0.0611299	FCER1A, TNF, CD3E, GATA3, IFNG, CD276, IL1B, TLR3, INPP5D	1003	38	8785	2.07443	1	0.594155	68.0017
GOTERM_BP_FAT	GO:0051249~regulation of lymphocyte activation	14	0.703164	0.0874691	IL4, CD3E, CD276, ADA, CD83, CASP3, LAX1, IFNG, LCK, IL1B, CD4, HSPD1, FAS, INPP5D	1003	76	8785	1.61345	1	0.690514	80.8626
GOTERM_BP_FAT	GO:0050863~regulation of T cell activation	12	0.602712	0.0982734	IL4, CD83, CASP3, CD3E, LAX1, LCK, IFNG, CD276, IL1B, CD4, HSPD1, ADA	1003	63	8785	1.66833	1	0.718493	84.5673
GOTERM_BP_FAT	GO:0050870~positive regulation of T cell activation	10	0.50226	0.0996728	IL4, CD83, CD3E, LCK, IFNG, CD276, IL1B, CD4, HSPD1, ADA	1003	49	8785	1.78749	1	0.722392	84.9943
GOTERM_BP_FAT	GO:0051251~positive regulation of lymphocyte activation	11	0.552486	0.12933	IL4, CD83, CD3E, LCK, IFNG, CD276, IL1B, CD4, INPP5D, HSPD1, ADA	1003	59	8785	1.63298	1	0.793633	91.8065
GOTERM_BP_FAT	GO:0045408~regulation of interleukin-6 biosynthetic process	3	0.150678	0.142898	IFNG, IL1B, INPP5D	1003	6	8785	4.37936	1	0.817424	93.8305
GOTERM_BP_FAT	GO:0050864~regulation of B cell activation	6	0.301356	0.148575	IL4, CASP3, IFNG, INPP5D, FAS, ADA	1003	25	8785	2.10209	1	0.828179	94.5284
GOTERM_BP_FAT	GO:0050670~regulation of lymphocyte proliferation	8	0.401808	0.164736	IL4, CASP3, CD3E, IFNG, CD276, IL1B, INPP5D, ADA	1003	40	8785	1.75174	1	0.851946	96.1294
GOTERM_BP_FAT	GO:0032944~regulation of mononuclear cell proliferation	8	0.401808	0.180437	IL4, CASP3, CD3E, IFNG, CD276, IL1B, INPP5D, ADA	1003	41	8785	1.70902	1	0.872795	97.2528
GOTERM_BP_FAT	GO:0070663~regulation of leukocyte proliferation	8	0.401808	0.180437	IL4, CASP3, CD3E, IFNG, CD276, IL1B, INPP5D, ADA	1003	41	8785	1.70902	1	0.872795	97.2528
GOTERM_BP_FAT	GO:0030888~regulation of B cell proliferation	4	0.200904	0.240398	IL4, CASP3, INPP5D, ADA	1003	15	8785	2.33566	1	0.927242	99.3037
GOTERM_BP_FAT	GO:0042129~regulation of T cell proliferation	6	0.301356	0.275369	IL4, CASP3, CD3E, IFNG, CD276, IL1B	1003	31	8785	1.69524	1	0.947275	99.7028
GOTERM_BP_FAT	GO:0032663~regulation of interleukin-2 production	4	0.200904	0.305394	CD83, CD3E, CD276, IL1B	1003	17	8785	2.06088	1	0.959481	99.8616
GOTERM_BP_FAT	GO:0045076~regulation of interleukin-2 biosynthetic process	3	0.150678	0.318611	CD3E, CD276, IL1B	1003	10	8785	2.62762	1	0.964456	99.9022
GOTERM_BP_FAT	GO:0050671~positive regulation of lymphocyte proliferation	6	0.301356	0.345511	IL4, CD3E, IFNG, CD276, IL1B, ADA	1003	34	8785	1.54566	1	0.9723	99.9528
GOTERM_BP_FAT	GO:0070665~positive regulation of leukocyte proliferation	6	0.301356	0.369219	IL4, CD3E, IFNG, CD276, IL1B, ADA	1003	35	8785	1.5015	1	0.978408	99.9757
GOTERM_BP_FAT	GO:0032946~positive regulation of mononuclear cell proliferation	6	0.301356	0.369219	IL4, CD3E, IFNG, CD276, IL1B, ADA	1003	35	8785	1.5015	1	0.978408	99.9757
GOTERM_BP_FAT	GO:0042102~positive regulation of T cell proliferation	5	0.25113	0.371421	IL4, CD3E, IFNG, CD276, IL1B	1003	27	8785	1.62199	1	0.978588	99.9772
GOTERM_BP_FAT	GO:0050871~positive regulation of B cell activation	4	0.200904	0.403385	IL4, IFNG, INPP5D, ADA	1003	20	8785	1.75174	1	0.984458	99.9911
Annotation Cluster 95	Enrichment Score: 1.1096891766649395
Category	Term	Count	%	PValue	Genes	List Total	Pop Hits	Pop Total	Fold Enrichment	Bonferroni	Benjamini	FDR
UP_SEQ_FEATURE	domain:Olfactomedin-like	4	0.200904	0.0327058	LPHN2, OLFML3, OLFML2B, MYOC	737	6	5635	5.09724	1	0.96566	43.1984
INTERPRO	IPR003112:Olfactomedin-like	4	0.200904	0.0807522	LPHN2, OLFML3, OLFML2B, MYOC	1235	8	9171	3.71296	1	0.907802	75.8973
SMART	SM00284:OLF	4	0.200904	0.100616	LPHN2, OLFML3, OLFML2B, MYOC	644	8	4364	3.3882	1	0.766445	75.5433
INTERPRO	IPR003924:GPCR, family 2, latrophilin	3	0.150678	0.137024	LPHN2, OLFML2B, MYOC	1235	5	9171	4.45555	1	0.964872	91.7115
Annotation Cluster 96	Enrichment Score: 1.0986079121008183
Category	Term	Count	%	PValue	Genes	List Total	Pop Hits	Pop Total	Fold Enrichment	Bonferroni	Benjamini	FDR
GOTERM_CC_FAT	GO:0000267~cell fraction	40	2.00904	0.0296298	CAV1, CYP51A1, CALD1, SNCA, ASNS, RPS6KB1, CALR, ITGB1, PCDHGA2, ACTG2, ADRB3, DES, STT3A, RASGRP4, LRRC59, EHD2, DDOST, P4HB, STX1A, TBXAS1, ACTA2, DPAGT1, TOMM40, CCDC47, ATP1A1, PKIA, P2RX7, LOC781339, LYNX1, DGAT2, ATP2A2, TSC1, ITGA5, CLIC4, IGF2R, SPCS3, HSPB2, HSD11B2, SPCS1, HSPA13, STEAP2	850	237	6966	1.38317	0.999987	0.268976	34.0044
GOTERM_CC_FAT	GO:0042598~vesicular fraction	15	0.75339	0.0451311	P4HB, TBXAS1, CYP51A1, DPAGT1, CCDC47, ATP1A1, CALR, ATP2A2, LRRC59, SPCS3, HSD11B2, SPCS1, HSPA13, STEAP2, DDOST	850	71	6966	1.7314	1	0.358567	47.1698
GOTERM_CC_FAT	GO:0005792~microsome	14	0.703164	0.0780324	P4HB, TBXAS1, CYP51A1, DPAGT1, CCDC47, ATP1A1, CALR, ATP2A2, LRRC59, SPCS3, HSD11B2, SPCS1, HSPA13, DDOST	850	70	6966	1.63906	1	0.449755	67.4556
GOTERM_CC_FAT	GO:0005624~membrane fraction	33	1.65746	0.078088	CAV1, CYP51A1, CALD1, SNCA, RPS6KB1, CALR, ITGB1, PCDHGA2, ADRB3, STT3A, RASGRP4, LRRC59, EHD2, DDOST, P4HB, STX1A, TBXAS1, DPAGT1, CCDC47, TOMM40, ATP1A1, P2RX7, LYNX1, DGAT2, ATP2A2, TSC1, ITGA5, IGF2R, SPCS3, HSD11B2, SPCS1, HSPA13, STEAP2	850	204	6966	1.32571	1	0.443639	67.4827
GOTERM_CC_FAT	GO:0005626~insoluble fraction	34	1.70768	0.0809805	CAV1, CYP51A1, CALD1, SNCA, RPS6KB1, CALR, ITGB1, PCDHGA2, ADRB3, STT3A, DES, RASGRP4, LRRC59, EHD2, DDOST, P4HB, STX1A, TBXAS1, DPAGT1, TOMM40, CCDC47, ATP1A1, P2RX7, LYNX1, DGAT2, ATP2A2, TSC1, ITGA5, IGF2R, SPCS3, HSD11B2, SPCS1, HSPA13, STEAP2	850	212	6966	1.31434	1	0.44982	68.8644
SP_PIR_KEYWORDS	microsome	6	0.301356	0.388068	CYP51A1, LRRC59, SPCS3, HSD11B2, SPCS1, HSPA13	1001	30	7349	1.46833	1	0.92372	99.9157
Annotation Cluster 97	Enrichment Score: 1.0917617346424857
Category	Term	Count	%	PValue	Genes	List Total	Pop Hits	Pop Total	Fold Enrichment	Bonferroni	Benjamini	FDR
GOTERM_BP_FAT	GO:0050727~regulation of inflammatory response	8	0.401808	0.0478825	FCER1A, A2M, ADORA3, C3, CD276, IDO1, LBP, ADA	1003	30	8785	2.33566	1	0.525928	58.7854
GOTERM_BP_FAT	GO:0050729~positive regulation of inflammatory response	5	0.25113	0.0518317	FCER1A, ADORA3, C3, IDO1, LBP	1003	13	8785	3.36874	1	0.546228	61.7667
GOTERM_BP_FAT	GO:0002673~regulation of acute inflammatory response	4	0.200904	0.073443	FCER1A, A2M, C3, LBP	1003	9	8785	3.89277	1	0.648975	74.791
GOTERM_BP_FAT	GO:0002675~positive regulation of acute inflammatory response	3	0.150678	0.102828	FCER1A, C3, LBP	1003	5	8785	5.25523	1	0.728499	85.9165
GOTERM_BP_FAT	GO:0002886~regulation of myeloid leukocyte mediated immunity	3	0.150678	0.185505	FCER1A, ADORA3, C3	1003	7	8785	3.75374	1	0.878159	97.544
Annotation Cluster 98	Enrichment Score: 1.0796022875581042
Category	Term	Count	%	PValue	Genes	List Total	Pop Hits	Pop Total	Fold Enrichment	Bonferroni	Benjamini	FDR
GOTERM_BP_FAT	GO:0010596~negative regulation of endothelial cell migration	3	0.150678	0.0666525	APOE, DLL4, THBS1	1003	4	8785	6.56904	1	0.618565	71.2364
GOTERM_BP_FAT	GO:0043537~negative regulation of blood vessel endothelial cell migration	3	0.150678	0.0666525	APOE, DLL4, THBS1	1003	4	8785	6.56904	1	0.618565	71.2364
GOTERM_BP_FAT	GO:0043535~regulation of blood vessel endothelial cell migration	3	0.150678	0.0666525	APOE, DLL4, THBS1	1003	4	8785	6.56904	1	0.618565	71.2364
GOTERM_BP_FAT	GO:0030336~negative regulation of cell migration	6	0.301356	0.0825908	APOE, CLIC4, DLL4, TIE1, THBS1, ADA	1003	21	8785	2.50249	1	0.674752	78.9277
GOTERM_BP_FAT	GO:0040013~negative regulation of locomotion	6	0.301356	0.0973166	APOE, CLIC4, DLL4, TIE1, THBS1, ADA	1003	22	8785	2.38874	1	0.717659	84.2688
GOTERM_BP_FAT	GO:0010594~regulation of endothelial cell migration	3	0.150678	0.102828	APOE, DLL4, THBS1	1003	5	8785	5.25523	1	0.728499	85.9165
GOTERM_BP_FAT	GO:0051271~negative regulation of cell motion	6	0.301356	0.113267	APOE, CLIC4, DLL4, TIE1, THBS1, ADA	1003	23	8785	2.28488	1	0.757522	88.6003
Annotation Cluster 99	Enrichment Score: 1.0696938161672849
Category	Term	Count	%	PValue	Genes	List Total	Pop Hits	Pop Total	Fold Enrichment	Bonferroni	Benjamini	FDR
INTERPRO	IPR000562:Type II fibronectin, collagen-binding	5	0.25113	0.0350009	LY75, IGF2R, MMP9, MMP2, FN1	1235	10	9171	3.71296	1	0.768921	45.2318
SMART	SM00059:FN2	5	0.25113	0.0469783	LY75, IGF2R, MMP9, MMP2, FN1	644	10	4364	3.3882	0.999999	0.557435	47.2176
UP_SEQ_FEATURE	domain:Fibronectin type-II 1	3	0.150678	0.178906	MMP9, MMP2, FN1	737	6	5635	3.82293	1	0.999719	96.5015
UP_SEQ_FEATURE	domain:Fibronectin type-II 2	3	0.150678	0.178906	MMP9, MMP2, FN1	737	6	5635	3.82293	1	0.999719	96.5015
Annotation Cluster 100	Enrichment Score: 1.0500048117826104
Category	Term	Count	%	PValue	Genes	List Total	Pop Hits	Pop Total	Fold Enrichment	Bonferroni	Benjamini	FDR
INTERPRO	IPR000980:SH2 motif	14	0.703164	0.0470373	ITK, GRAP, SOCS3, STAT1, SHE, CISH, SH2D1A, STAT4, DAPP1, LCK, CHN2, SHC1, INPP5D, GRB7, MATK	1235	59	9171	1.76208	1	0.836154	55.6989
SP_PIR_KEYWORDS	growth regulation	6	0.301356	0.0701908	IGSF11, SOCS3, IFNG, SHC1, KCTD11, CISH	1001	17	7349	2.59117	1	0.519114	64.9672
SMART	SM00252:SH2	14	0.703164	0.0843903	ITK, GRAP, SOCS3, STAT1, SHE, CISH, SH2D1A, STAT4, DAPP1, LCK, CHN2, SHC1, INPP5D, GRB7, MATK	644	59	4364	1.60796	1	0.719049	68.9886
UP_SEQ_FEATURE	domain:SH2	6	0.301356	0.0915354	SH2D1A, GRAP, SOCS3, SHC1, GRB7, CISH	737	19	5635	2.41448	1	0.995053	80.4635
SP_PIR_KEYWORDS	SH2 domain	6	0.301356	0.220481	SH2D1A, GRAP, SOCS3, SHC1, GRB7, CISH	1001	24	7349	1.83541	1	0.824495	97.2398
Annotation Cluster 101	Enrichment Score: 1.0490713454584693
Category	Term	Count	%	PValue	Genes	List Total	Pop Hits	Pop Total	Fold Enrichment	Bonferroni	Benjamini	FDR
UP_SEQ_FEATURE	lipid moiety-binding region:GPI-anchor amidated glycine	5	0.25113	0.00348177	CDH13, HYAL2, LYNX1, PRND, NRN1	737	6	5635	6.37155	0.99828	0.439354	5.76005
SP_PIR_KEYWORDS	gpi-anchor	8	0.401808	0.15254	ALPL, CDH13, HYAL2, ACHE, LYNX1, PRND, NRN1, GPC1	1001	33	7349	1.7798	1	0.738882	90.7952
GOTERM_CC_FAT	GO:0031225~anchored to membrane	12	0.602712	0.287529	ALPL, CDH13, HYAL2, ACHE, LYNX1, PRND, CD2, RAB6B, BASP1, NRN1, RAB27B, GPC1	850	74	6966	1.32897	1	0.804047	99.076
UP_SEQ_FEATURE	propeptide:Removed in mature form	13	0.652938	0.416724	ALPL, HYAL2, RAB8B, ACTA2, PRND, NRN1, PSMB5, ACTG2, CDH13, CATHL2, RAB30, LYNX1, UFM1, GNG5	737	84	5635	1.18329	1	0.999999	99.9896
Annotation Cluster 102	Enrichment Score: 1.045537775715636
Category	Term	Count	%	PValue	Genes	List Total	Pop Hits	Pop Total	Fold Enrichment	Bonferroni	Benjamini	FDR
GOTERM_MF_FAT	GO:0004955~prostaglandin receptor activity	4	0.200904	0.0479938	PTGER3, PTGER4, PTGDR, HPGD	1013	8	9249	4.56515	1	0.516182	53.694
GOTERM_MF_FAT	GO:0004953~icosanoid receptor activity	4	0.200904	0.0662779	PTGER3, PTGER4, PTGDR, HPGD	1013	9	9249	4.05791	1	0.597913	65.8177
GOTERM_MF_FAT	GO:0004954~prostanoid receptor activity	4	0.200904	0.0662779	PTGER3, PTGER4, PTGDR, HPGD	1013	9	9249	4.05791	1	0.597913	65.8177
GOTERM_MF_FAT	GO:0004957~prostaglandin E receptor activity	3	0.150678	0.0955624	PTGER3, PTGER4, HPGD	1013	5	9249	5.47818	1	0.688899	79.2427
INTERPRO	IPR008365:Prostanoid receptor	3	0.150678	0.293834	PTGER3, PTGER4, PTGDR	1235	8	9171	2.78472	1	0.997959	99.7203
Annotation Cluster 103	Enrichment Score: 1.0291921078589044
Category	Term	Count	%	PValue	Genes	List Total	Pop Hits	Pop Total	Fold Enrichment	Bonferroni	Benjamini	FDR
GOTERM_CC_FAT	GO:0042101~T cell receptor complex	4	0.200904	0.0271538	CD3G, CD3D, CD3E, TRAT1	850	6	6966	5.46353	0.999967	0.261868	31.6393
PIR_SUPERFAMILY	PIRSF001993:T-cell surface glycoprotein CD3 delta chain	3	0.150678	0.0615687	CD3G, CD3D, CD3E	589	3	3890	6.60441	1	0.999394	60.7347
GOTERM_CC_FAT	GO:0042105~alpha-beta T cell receptor complex	3	0.150678	0.0752525	CD3G, CD3D, CD3E	850	4	6966	6.14647	1	0.450493	66.0733
UP_SEQ_FEATURE	domain:ITAM	3	0.150678	0.130172	CD3G, CD3D, CD3E	737	5	5635	4.58752	1	0.99915	90.6718
INTERPRO	IPR003110:Phosphorylated immunoreceptor signaling ITAM	3	0.150678	0.187811	CD3G, CD3D, CD3E	1235	6	9171	3.71296	1	0.984661	97.026
SMART	SM00077:ITAM	3	0.150678	0.217218	CD3G, CD3D, CD3E	644	6	4364	3.3882	1	0.874375	96.1312
Annotation Cluster 104	Enrichment Score: 0.9858843157423809
Category	Term	Count	%	PValue	Genes	List Total	Pop Hits	Pop Total	Fold Enrichment	Bonferroni	Benjamini	FDR
GOTERM_BP_FAT	GO:0000041~transition metal ion transport	14	0.703164	0.0017572	TF, SLC39A14, ATOX1, SFXN3, SFXN1, SFXN2, TCN2, LOC788801, LTF, GUCY1B3, SLC30A3, SLC31A1, ATP7B, SLC30A7	1003	47	8785	2.60898	0.995621	0.0689672	3.12719
SP_PIR_KEYWORDS	iron transport	6	0.301356	0.00643207	TF, SFXN3, LTF, GUCY1B3, SFXN1, SFXN2	1001	10	7349	4.405	0.961062	0.109454	8.88082
GOTERM_BP_FAT	GO:0006826~iron ion transport	8	0.401808	0.033991	SLC39A14, TF, LOC788801, SFXN3, LTF, GUCY1B3, SFXN1, SFXN2	1003	28	8785	2.50249	1	0.442085	46.4586
PIR_SUPERFAMILY	PIRSF009336:probable membrane protein	3	0.150678	0.0615687	SFXN3, SFXN1, SFXN2	589	3	3890	6.60441	1	0.999394	60.7347
GOTERM_BP_FAT	GO:0015674~di-, tri-valent inorganic cation transport	18	0.904068	0.0798296	TF, SLC39A14, CAV1, SFXN3, CACNB3, SFXN1, SFXN2, TCN2, ANXA6, ATP2B2, P2RX7, LOC788801, ATP2A3, NMUR2, LCK, LTF, GUCY1B3, F2R	1003	104	8785	1.51593	1	0.671154	77.752
INTERPRO	IPR004686:Tricarboxylate/iron carrier	3	0.150678	0.137024	SFXN3, SFXN1, SFXN2	1235	5	9171	4.45555	1	0.964872	91.7115
GOTERM_BP_FAT	GO:0030001~metal ion transport	38	1.90859	0.22172	SLC9A9, TF, SLC39A14, CAV1, SCN1B, ATOX1, SFXN3, LOC531152, CACNB3, SFXN1, SFXN2, ANXA6, ATP2B2, NMUR2, SLC39A7, LTF, SLC30A3, SLC39A5, SLC31A1, SLC30A7, KCNMA1, KCND1, KCTD20, LOC518911, ATP1A1, TCN2, P2RX7, KCNN1, TSC1, LOC788801, KCNJ8, ATP2A3, LCK, SCN4B, GUCY1B3, KCTD11, ATP7B, F2R	1003	285	8785	1.16783	1	0.912329	98.9201
GOTERM_MF_FAT	GO:0046873~metal ion transmembrane transporter activity	22	1.10497	0.555832	KCNMA1, SLC39A14, SCN1B, KCND1, SNCA, KCTD20, CACNB3, P2RX5, ATP2B2, KCNN4, P2RX7, KCNN1, ATP2A2, KCNJ8, ATP2A3, SCN4B, SLC39A7, SLC39A5, SLC31A1, KCTD11, ATP7B, SLC30A7	1013	194	9249	1.0354	1	0.990794	99.9997
GOTERM_BP_FAT	GO:0006812~cation transport	41	2.05927	0.574458	SLC9A9, SLC39A14, TF, CAV1, SCN1B, ATOX1, SFXN3, LOC531152, CACNB3, SFXN1, SFXN2, AQP1, ANXA6, ATP2B2, ATP2B4, NMUR2, SLC39A7, LTF, SLC30A3, SLC39A5, SLC31A1, SLC30A7, KCNMA1, KCND1, KCTD20, LOC518911, ATP1A1, TCN2, P2RX7, KCNN1, ATP2A2, TSC1, LOC788801, KCNJ8, ATP2A3, LCK, SCN4B, GUCY1B3, KCTD11, ATP7B, F2R	1003	357	8785	1.0059	1	0.997742	100
GOTERM_BP_FAT	GO:0006811~ion transport	53	2.66198	0.834525	SLC9A9, ATOX1, LOC531152, AQP1, ATP2B2, SLC16A1, ATP2B4, NMUR2, LTF, KCNMA1, PTGER3, KCND1, KCTD20, LOC518911, TCN2, CLIC4, LOC788801, LCK, GUCY1B3, SLC39A14, TF, CAV1, SCN1B, SFXN3, SFXN1, CACNB3, SFXN2, LOC528412, ANXA6, LOC521568, SLC39A7, SLCO3A1, SLC30A3, SLC39A5, SLC31A1, SLC30A7, TPC3, GABRD, TNXB, TOMM40, ATP1A1, P2RX5, P2RX7, ATP2A2, KCNN1, SLC16A7, TSC1, KCNJ8, ATP2A3, SCN4B, KCTD11, F2…	1003	511	8785	0.908439	1	0.999978	100
SP_PIR_KEYWORDS	ion transport	24	1.20542	0.935341	TPC3, KCNMA1, GABRD, SLC9A9, TF, SLC39A14, SCN1B, KCND1, ATOX1, SFXN3, LOC531152, CACNB3, ATP1A1, SFXN1, SFXN2, TCN2, KCNJ8, CLIC4, LTF, SCN4B, GUCY1B3, SLCO3A1, SLC30A3, SLC30A7	1001	220	7349	0.800908	1	0.999763	100
Annotation Cluster 105	Enrichment Score: 0.9816151180425517
Category	Term	Count	%	PValue	Genes	List Total	Pop Hits	Pop Total	Fold Enrichment	Bonferroni	Benjamini	FDR
INTERPRO	IPR013787:S100/CaBP-9k-type, calcium binding, subdomain	6	0.301356	0.0533368	S100A16, S100A8, S100A9, S100A11, S100A12, S100A2	1235	16	9171	2.78472	1	0.838037	60.396
INTERPRO	IPR001751:S100/CaBP-9k-type, calcium binding	6	0.301356	0.0533368	S100A16, S100A8, S100A9, S100A11, S100A12, S100A2	1235	16	9171	2.78472	1	0.838037	60.396
UP_SEQ_FEATURE	calcium-binding region:1; low affinity	5	0.25113	0.0603796	S100A16, S100A8, S100A9, S100A12, S100A2	737	12	5635	3.18578	1	0.987368	65.3312
UP_SEQ_FEATURE	calcium-binding region:2; high affinity	5	0.25113	0.0785162	S100A16, S100A8, S100A9, S100A12, S100A2	737	13	5635	2.94072	1	0.991884	75.1138
SP_PIR_KEYWORDS	EF hand	6	0.301356	0.170278	S100A8, NCALD, HPCAL4, S100A9, SPARC, S100A2	1001	22	7349	2.00227	1	0.769399	93.214
PIR_SUPERFAMILY	PIRSF002353:S-100 protein	3	0.150678	0.561367	S100A8, S100A12, S100A2	589	12	3890	1.6511	1	1	99.9995
Annotation Cluster 106	Enrichment Score: 0.9606713016567211
Category	Term	Count	%	PValue	Genes	List Total	Pop Hits	Pop Total	Fold Enrichment	Bonferroni	Benjamini	FDR
GOTERM_BP_FAT	GO:0006525~arginine metabolic process	5	0.25113	0.00806814	ASS1, NOS3, NOS2, ASL, FAH	1003	8	8785	5.4742	1	0.185389	13.6136
GOTERM_BP_FAT	GO:0006527~arginine catabolic process	3	0.150678	0.0360335	NOS3, NOS2, FAH	1003	3	8785	8.75872	1	0.456256	48.4672
GOTERM_BP_FAT	GO:0009310~amine catabolic process	9	0.452034	0.160926	BCAT1, AMDHD1, ACHE, SDS, MAOA, NOS3, IDO1, NOS2, FAH	1003	47	8785	1.6772	1	0.848602	95.7979
GOTERM_BP_FAT	GO:0009065~glutamine family amino acid catabolic process	3	0.150678	0.22955	NOS3, NOS2, FAH	1003	8	8785	3.28452	1	0.91926	99.1003
GOTERM_BP_FAT	GO:0016054~organic acid catabolic process	10	0.50226	0.24084	BCAT1, AMDHD1, SDS, ETFDH, NOS3, IDO1, HSD17B4, NOS2, IRG1, FAH	1003	60	8785	1.45979	1	0.927057	99.3109
GOTERM_BP_FAT	GO:0046395~carboxylic acid catabolic process	10	0.50226	0.24084	BCAT1, AMDHD1, SDS, ETFDH, NOS3, IDO1, HSD17B4, NOS2, IRG1, FAH	1003	60	8785	1.45979	1	0.927057	99.3109
GOTERM_BP_FAT	GO:0009063~cellular amino acid catabolic process	7	0.351582	0.302596	BCAT1, AMDHD1, SDS, NOS3, IDO1, NOS2, FAH	1003	40	8785	1.53278	1	0.958401	99.8512
Annotation Cluster 107	Enrichment Score: 0.9514549542394002
Category	Term	Count	%	PValue	Genes	List Total	Pop Hits	Pop Total	Fold Enrichment	Bonferroni	Benjamini	FDR
GOTERM_MF_FAT	GO:0032553~ribonucleotide binding	171	8.58865	0.00557987	FASTKD1, CLPB, IDE, HBS1L, RPS6KB1, MTHFD1L, RAB1A, ACTG2, ATP2B2, ACSS1, ATP2B4, DIRAS2, MAP3K8, RAB26, MX1, RAB27B, SAR1B, SAR1A, MX2, MATK, RAB27A, GBP7, YARS, CARS, PDXK, GBP5, ROCK2, AARS, IFI47, GEM, RND2, MAPK6, PDGFRA, PDGFRB, GBP4, EIF2AK3, LRRK1, ABCA9, GCLC, ASS1, GNE, TDRD9, UBA7, MAP4K1, HSPA1A, LOC507055, CTPS2, LOC781675, OAS2, EPHB3, RIOK1, ABCA6, RAB40B, LOC528412, CMPK2, MOV10, …	1013	1304	9249	1.1973	0.994504	0.150085	8.38629
GOTERM_MF_FAT	GO:0032555~purine ribonucleotide binding	171	8.58865	0.00557987	FASTKD1, CLPB, IDE, HBS1L, RPS6KB1, MTHFD1L, RAB1A, ACTG2, ATP2B2, ACSS1, ATP2B4, DIRAS2, MAP3K8, RAB26, MX1, RAB27B, SAR1B, SAR1A, MX2, MATK, RAB27A, GBP7, YARS, CARS, PDXK, GBP5, ROCK2, AARS, IFI47, GEM, RND2, MAPK6, PDGFRA, PDGFRB, GBP4, EIF2AK3, LRRK1, ABCA9, GCLC, ASS1, GNE, TDRD9, UBA7, MAP4K1, HSPA1A, LOC507055, CTPS2, LOC781675, OAS2, EPHB3, RIOK1, ABCA6, RAB40B, LOC528412, CMPK2, MOV10, …	1013	1304	9249	1.1973	0.994504	0.150085	8.38629
GOTERM_MF_FAT	GO:0017076~purine nucleotide binding	177	8.89001	0.00773941	GNA15, FASTKD1, CLPB, IDE, HBS1L, RPS6KB1, MTHFD1L, RAB1A, ACTG2, ATP2B2, ACSS1, ATP2B4, DIRAS2, MAP3K8, RAB26, MX1, RAB27B, SAR1B, SAR1A, MX2, MATK, RAB27A, GBP7, YARS, CARS, PDXK, GBP5, ROCK2, AARS, IFI47, GEM, RND2, MAPK6, PDGFRA, PDGFRB, GBP4, EIF2AK3, LRRK1, XDH, ABCA9, GCLC, ASS1, GNE, TDRD9, UBA7, MAP4K1, HSPA1A, LOC507055, CTPS2, LOC781675, OAS2, EPHB3, RIOK1, ABCA6, RAB40B, LOC528412, CM…	1013	1363	9249	1.18567	0.999272	0.191455	11.4516
GOTERM_MF_FAT	GO:0000166~nucleotide binding	192	9.6434	0.116108	FASTKD1, RAB1A, ACTG2, ATP2B2, DIRAS2, ATP2B4, RAVER1, NT5C2, MAP3K8, RAB26, RAB27B, RAB27A, GBP7, YARS, GBP5, ROCK2, AARS, IFI47, GEM, RND2, MAPK6, PDGFRA, PDGFRB, EIF2AK3, TDRD9, PABPC4, UBA7, HSPA1A, OAS2, LOC781675, EPHB3, RAB40B, MOV10, VRK3, GPD1, GARS, ACACA, RAB7L1, KDR, CCT5, OASL, DHFR, ATP2A2, ATP2A3, HSPA13, FUK, PARP1, SLC27A1, SEPHS2, ACVRL1, NARS, NUAK2, CPEB3, MYO7A, CRCP, ATP10D,…	1013	1615	9249	1.08546	1	0.740853	85.5136
GOTERM_MF_FAT	GO:0032559~adenyl ribonucleotide binding	123	6.1778	0.164869	FASTKD1, CLPB, IDE, RPS6KB1, MTHFD1L, ACTG2, ATP2B2, ACSS1, ATP2B4, MAP3K8, MATK, CARS, YARS, PDXK, ROCK2, AARS, MAPK6, PDGFRA, PDGFRB, LRRK1, EIF2AK3, ABCA9, GCLC, ASS1, GNE, TDRD9, UBA7, MAP4K1, CTPS2, HSPA1A, OAS2, EPHB3, RIOK1, ABCA6, LOC528412, CMPK2, MOV10, LOC521568, VRK3, TEK, HSPE1, ENTPD1, TEC, ITK, AK1, LOC786352, BMX, GARS, ACACA, AK2, ABCB1, KDR, DDX58, P2RX5, DNA2, P2RX7, CCT5, OASL…	1013	1027	9249	1.0935	1	0.819089	94.0409
GOTERM_MF_FAT	GO:0005524~ATP binding	121	6.07735	0.192416	FASTKD1, CLPB, IDE, RPS6KB1, MTHFD1L, ACTG2, ATP2B2, ATP2B4, MAP3K8, MATK, CARS, YARS, PDXK, ROCK2, AARS, MAPK6, PDGFRA, PDGFRB, LRRK1, EIF2AK3, ABCA9, ASS1, GNE, TDRD9, UBA7, MAP4K1, CTPS2, HSPA1A, OAS2, EPHB3, RIOK1, ABCA6, LOC528412, CMPK2, MOV10, LOC521568, VRK3, TEK, HSPE1, ENTPD1, TEC, ITK, AK1, LOC786352, BMX, GARS, ACACA, AK2, ABCB1, KDR, DDX58, P2RX5, DNA2, P2RX7, CCT5, OASL, LOC781339, …	1013	1018	9249	1.08523	1	0.841224	96.475
GOTERM_MF_FAT	GO:0030554~adenyl nucleotide binding	128	6.42893	0.206637	FASTKD1, CLPB, IDE, RPS6KB1, MTHFD1L, ACTG2, ATP2B2, ACSS1, ATP2B4, MAP3K8, MATK, CARS, YARS, PDXK, ROCK2, AARS, MAPK6, PDGFRA, PDGFRB, EIF2AK3, LRRK1, XDH, ABCA9, GCLC, ASS1, GNE, TDRD9, UBA7, MAP4K1, CTPS2, HSPA1A, OAS2, EPHB3, RIOK1, ABCA6, LOC528412, CMPK2, MOV10, LOC521568, VRK3, TEK, HSPE1, ERO1L, ENTPD1, TEC, ITK, AK1, LOC786352, BMX, GARS, ACACA, AK2, ABCB1, KDR, DDX58, P2RX5, DNA2, P2RX7…	1013	1083	9249	1.07911	1	0.856206	97.3308
GOTERM_MF_FAT	GO:0001883~purine nucleoside binding	128	6.42893	0.231765	FASTKD1, CLPB, IDE, RPS6KB1, MTHFD1L, ACTG2, ATP2B2, ACSS1, ATP2B4, MAP3K8, MATK, CARS, YARS, PDXK, ROCK2, AARS, MAPK6, PDGFRA, PDGFRB, EIF2AK3, LRRK1, XDH, ABCA9, GCLC, ASS1, GNE, TDRD9, UBA7, MAP4K1, CTPS2, HSPA1A, OAS2, EPHB3, RIOK1, ABCA6, LOC528412, CMPK2, MOV10, LOC521568, VRK3, TEK, HSPE1, ERO1L, ENTPD1, TEC, ITK, AK1, LOC786352, BMX, GARS, ACACA, AK2, ABCB1, KDR, DDX58, P2RX5, DNA2, P2RX7…	1013	1093	9249	1.06924	1	0.881424	98.3872
GOTERM_MF_FAT	GO:0001882~nucleoside binding	128	6.42893	0.265847	FASTKD1, CLPB, IDE, RPS6KB1, MTHFD1L, ACTG2, ATP2B2, ACSS1, ATP2B4, MAP3K8, MATK, CARS, YARS, PDXK, ROCK2, AARS, MAPK6, PDGFRA, PDGFRB, EIF2AK3, LRRK1, XDH, ABCA9, GCLC, ASS1, GNE, TDRD9, UBA7, MAP4K1, CTPS2, HSPA1A, OAS2, EPHB3, RIOK1, ABCA6, LOC528412, CMPK2, MOV10, LOC521568, VRK3, TEK, HSPE1, ERO1L, ENTPD1, TEC, ITK, AK1, LOC786352, BMX, GARS, ACACA, AK2, ABCB1, KDR, DDX58, P2RX5, DNA2, P2RX7…	1013	1099	9249	1.0634	1	0.908831	99.2073
GOTERM_MF_FAT	GO:0004672~protein kinase activity	49	2.46107	0.419838	FASTKD1, ACVRL1, NUAK2, RPS6KB1, DDR2, CAMKK2, ACVR1B, ADCK1, MAP3K8, TIE1, MATK, IRAK1, CDK1, SGK2, ROCK2, CDK8, PRKCH, CCND3, MAPK6, LCK, PDGFRA, ERN1, PDGFRB, LRRK1, EIF2AK3, PRKCZ, MAP4K1, RIOK1, EPHB3, TRIB2, TRIB1, VRK3, TEK, TEC, ITK, FLT3, FLT4, AXL, BMX, NPR1, KDR, LOC616014, MAPK13, ULK1, WIF1, IKBKB, BMPR1B, CIT, MYLK	1013	423	9249	1.05765	1	0.971724	99.9801
SP_PIR_KEYWORDS	nucleotide-binding	95	4.77147	0.846336	CLPB, IDE, HBS1L, RPS6KB1, RAB1A, MTHFD1L, ACTG2, ATP2B4, NT5C2, RAB26, MX1, RAB27B, SAR1B, SAR1A, MX2, RAB27A, MATK, YARS, PDXK, ROCK2, GEM, MAPK6, ABCA9, ASS1, MAP4K1, CTPS2, HSPA1A, RAB40B, MOV10, VRK3, TEK, RHOBTB2, ENTPD1, ITK, RAB8B, EEF1A2, AK1, ACACA, AK2, ABCB1, RAB7L1, CCT5, LOC781339, ATP2A2, LOC785867, HSPA13, HSPD1, FUK, IKBKB, MYLK, MYH10, SLC27A1, ACVRL1, NUAK2, NARS, ATP10D, CAMKK…	1001	754	7349	0.92501	1	0.997796	100
SP_PIR_KEYWORDS	atp-binding	62	3.11401	0.952431	ACVRL1, NARS, NUAK2, CLPB, IDE, ATP10D, RPS6KB1, MTHFD1L, CAMKK2, ACTG2, WARS, HSPH1, ATP2B4, TIE1, MATK, ABCE1, IRAK1, CDK1, YARS, SGK2, PDXK, ACTA2, ROCK2, PRKCH, CCT6A, TOR2A, TARS, MAPK6, LCK, TOM1, UBE2S, PRKCZ, ABCA9, ASS1, DCK, MAP4K1, CTPS2, HSPA1A, ASNS, MOV10, VRK3, TEK, GK5, HSPA5, ENTPD1, HSPA9, ITK, AK1, ACACA, AK2, ABCB1, ATP1A1, CCT5, LOC781339, ATP2A2, MAPK13, FUK, HSPD1, HSPA13, …	1001	537	7349	0.84764	1	0.999826	100
Annotation Cluster 108	Enrichment Score: 0.9222171181351113
Category	Term	Count	%	PValue	Genes	List Total	Pop Hits	Pop Total	Fold Enrichment	Bonferroni	Benjamini	FDR
GOTERM_BP_FAT	GO:0007517~muscle organ development	18	0.904068	0.0160001	RBP4, SCHIP1, CAV1, ACTA2, ELN, HSPG2, ITGB1, GJC1, ACTG2, APP, MSX1, LY6E, TAGLN, TSC1, ETV1, PDGFRB, NR2F2, MYH10, SERP1	1003	86	8785	1.83322	1	0.284148	25.2765
GOTERM_BP_FAT	GO:0060537~muscle tissue development	14	0.703164	0.0415784	RBP4, SCHIP1, CAV1, ACTA2, ELN, HSPG2, ITGB1, GJC1, ACTG2, APP, LY6E, TSC1, PDGFRB, NR2F2, MYH10	1003	68	8785	1.80327	1	0.486078	53.5671
GOTERM_BP_FAT	GO:0048738~cardiac muscle tissue development	7	0.351582	0.105003	RBP4, LY6E, TSC1, HSPG2, ITGB1, GJC1, MYH10	1003	29	8785	2.11417	1	0.733573	86.5206
GOTERM_BP_FAT	GO:0014706~striated muscle tissue development	12	0.602712	0.116395	RBP4, CAV1, ACTA2, ELN, HSPG2, ITGB1, GJC1, ACTG2, APP, TSC1, LY6E, NR2F2, MYH10	1003	65	8785	1.617	1	0.764828	89.3052
GOTERM_BP_FAT	GO:0007519~skeletal muscle tissue development	5	0.25113	0.600185	ACTG2, APP, CAV1, ACTA2, ELN, NR2F2	1003	36	8785	1.21649	1	0.998322	100
GOTERM_BP_FAT	GO:0060538~skeletal muscle organ development	5	0.25113	0.600185	ACTG2, APP, CAV1, ACTA2, ELN, NR2F2	1003	36	8785	1.21649	1	0.998322	100
Annotation Cluster 109	Enrichment Score: 0.9203026698810496
Category	Term	Count	%	PValue	Genes	List Total	Pop Hits	Pop Total	Fold Enrichment	Bonferroni	Benjamini	FDR
GOTERM_BP_FAT	GO:0001816~cytokine production	8	0.401808	0.0230734	IRF9, IL12RB2, S1PR3, IL1RAP, CD4, HSPD1, PTAFR, IFNAR1	1003	26	8785	2.69499	1	0.357406	34.4067
GOTERM_BP_FAT	GO:0042107~cytokine metabolic process	3	0.150678	0.274151	IRF9, IL1RAP, IFNAR1	1003	9	8785	2.91957	1	0.946923	99.6936
GOTERM_BP_FAT	GO:0042089~cytokine biosynthetic process	3	0.150678	0.274151	IRF9, IL1RAP, IFNAR1	1003	9	8785	2.91957	1	0.946923	99.6936
Annotation Cluster 110	Enrichment Score: 0.9101001311049987
Category	Term	Count	%	PValue	Genes	List Total	Pop Hits	Pop Total	Fold Enrichment	Bonferroni	Benjamini	FDR
INTERPRO	IPR002035:von Willebrand factor, type A	10	0.50226	0.0524734	COCH, CPNE9, ITGAL, VWF, COL21A1, CFB, COL6A2, COL12A1, VWA1, ITGB1	1235	37	9171	2.007	1	0.844594	59.7811
SMART	SM00327:VWA	10	0.50226	0.0836643	COCH, CPNE9, ITGAL, VWF, COL21A1, CFB, COL6A2, COL12A1, VWA1, ITGB1	644	37	4364	1.83146	1	0.734033	68.6605
UP_SEQ_FEATURE	domain:VWFA	4	0.200904	0.423858	ITGAL, CFB, VWA1, ITGB1	737	18	5635	1.69908	1	0.999999	99.9916
Annotation Cluster 111	Enrichment Score: 0.8925956966642324
Category	Term	Count	%	PValue	Genes	List Total	Pop Hits	Pop Total	Fold Enrichment	Bonferroni	Benjamini	FDR
GOTERM_BP_FAT	GO:0051480~cytosolic calcium ion homeostasis	9	0.452034	0.0241216	P2RX7, GNA15, CAV1, PTGER3, NMUR2, F2, LCK, EDN1, F2R	1003	32	8785	2.46339	1	0.368564	35.6666
GOTERM_BP_FAT	GO:0007204~elevation of cytosolic calcium ion concentration	7	0.351582	0.0793088	P2RX7, GNA15, PTGER3, NMUR2, LCK, EDN1, F2R	1003	27	8785	2.27078	1	0.670245	77.5234
GOTERM_BP_FAT	GO:0051209~release of sequestered calcium ion into cytosol	3	0.150678	0.142898	P2RX7, LCK, F2R	1003	6	8785	4.37936	1	0.817424	93.8305
GOTERM_BP_FAT	GO:0051282~regulation of sequestering of calcium ion	3	0.150678	0.142898	P2RX7, LCK, F2R	1003	6	8785	4.37936	1	0.817424	93.8305
GOTERM_BP_FAT	GO:0051283~negative regulation of sequestering of calcium ion	3	0.150678	0.142898	P2RX7, LCK, F2R	1003	6	8785	4.37936	1	0.817424	93.8305
GOTERM_BP_FAT	GO:0060401~cytosolic calcium ion transport	3	0.150678	0.142898	P2RX7, LCK, F2R	1003	6	8785	4.37936	1	0.817424	93.8305
GOTERM_BP_FAT	GO:0060402~calcium ion transport into cytosol	3	0.150678	0.142898	P2RX7, LCK, F2R	1003	6	8785	4.37936	1	0.817424	93.8305
GOTERM_BP_FAT	GO:0006816~calcium ion transport	9	0.452034	0.634415	ANXA6, ATP2B2, P2RX7, CAV1, ATP2A3, NMUR2, LCK, CACNB3, F2R	1003	75	8785	1.05105	1	0.998966	100
Annotation Cluster 112	Enrichment Score: 0.8861114450055045
Category	Term	Count	%	PValue	Genes	List Total	Pop Hits	Pop Total	Fold Enrichment	Bonferroni	Benjamini	FDR
GOTERM_MF_FAT	GO:0016706~oxidoreductase activity, acting on paired donors, with incorporation or reduction of molecular oxygen, 2-oxoglutarate as one donor, and incorporation of one atom each of oxygen into both donors	5	0.25113	0.0454694	P4HB, P4HA2, PLOD1, PLOD2, ASPH	1013	13	9249	3.51166	1	0.502437	51.7342
GOTERM_MF_FAT	GO:0016702~oxidoreductase activity, acting on single donors with incorporation of molecular oxygen, incorporation of two atoms of oxygen	7	0.351582	0.0899302	ADI1, P4HA2, PLOD1, ALOX12E, IDO1, ASPH, HPDL	1013	29	9249	2.20387	1	0.674879	77.1243
GOTERM_MF_FAT	GO:0016701~oxidoreductase activity, acting on single donors with incorporation of molecular oxygen	7	0.351582	0.102542	ADI1, P4HA2, PLOD1, ALOX12E, IDO1, ASPH, HPDL	1013	30	9249	2.1304	1	0.706836	81.6133
SP_PIR_KEYWORDS	dioxygenase	4	0.200904	0.680812	ADI1, PLOD1, ALOX12E, ASPH	1001	25	7349	1.17467	1	0.989526	100
Annotation Cluster 113	Enrichment Score: 0.8797138562740409
Category	Term	Count	%	PValue	Genes	List Total	Pop Hits	Pop Total	Fold Enrichment	Bonferroni	Benjamini	FDR
GOTERM_CC_FAT	GO:0008305~integrin complex	6	0.301356	0.0869284	ITGA9, ITGAL, ITGA11, ITGA1, ITGB3, ITGB1	850	20	6966	2.45859	1	0.468225	71.5361
KEGG_PATHWAY	bta05412:Arrhythmogenic right ventricular cardiomyopathy (ARVC)	13	0.652938	0.110392	ITGA1, LMNA, ITGA11, GJA1, LEF1, CACNB3, ITGB3, ITGB1, ITGA9, DES, ITGA6, ITGA5, ITGA7	624	65	4940	1.58333	1	0.522002	76.4208
KEGG_PATHWAY	bta05414:Dilated cardiomyopathy	14	0.703164	0.166001	TNF, ADCY6, ITGA1, LMNA, ITGA11, CACNB3, ITGB3, TPM2, ITGB1, ITGA9, DES, ITGA6, ITGA5, ITGA7	624	77	4940	1.43939	1	0.592535	89.3762
KEGG_PATHWAY	bta05410:Hypertrophic cardiomyopathy (HCM)	13	0.652938	0.19008	TNF, ITGA1, LMNA, ITGA11, CACNB3, ITGB3, TPM2, ITGB1, ITGA9, DES, ITGA6, ITGA5, ITGA7	624	72	4940	1.4294	1	0.618826	92.6018
Annotation Cluster 114	Enrichment Score: 0.8767968478918342
Category	Term	Count	%	PValue	Genes	List Total	Pop Hits	Pop Total	Fold Enrichment	Bonferroni	Benjamini	FDR
GOTERM_MF_FAT	GO:0004802~transketolase activity	3	0.150678	0.0332718	TKT, TKTL2, TKTL1	1013	3	9249	9.13031	1	0.424256	41.1208
INTERPRO	IPR005474:Transketolase, N-terminal	3	0.150678	0.0494147	TKT, TKTL2, TKTL1	1235	3	9171	7.42591	1	0.838513	57.53
GOTERM_MF_FAT	GO:0016744~transferase activity, transferring aldehyde or ketonic groups	3	0.150678	0.0617453	TKT, TKTL2, TKTL1	1013	4	9249	6.84773	1	0.581741	63.1259
INTERPRO	IPR015941:Transketolase C-terminal-like	3	0.150678	0.137024	TKT, TKTL2, TKTL1	1235	5	9171	4.45555	1	0.964872	91.7115
INTERPRO	IPR005476:Transketolase, C-terminal	3	0.150678	0.137024	TKT, TKTL2, TKTL1	1235	5	9171	4.45555	1	0.964872	91.7115
INTERPRO	IPR005475:Transketolase, central region	3	0.150678	0.187811	TKT, TKTL2, TKTL1	1235	6	9171	3.71296	1	0.984661	97.026
UP_SEQ_FEATURE	metal ion-binding site:Calcium	5	0.25113	0.200727	ARSK, TKT, TKTL2, TKTL1, FAH	737	18	5635	2.12385	1	0.999862	97.7874
SP_PIR_KEYWORDS	thiamine pyrophosphate	3	0.150678	0.298643	TKT, TKTL2, TKTL1	1001	8	7349	2.75312	1	0.880472	99.398
KEGG_PATHWAY	bta00030:Pentose phosphate pathway	4	0.200904	0.598716	TKT, TKTL2, FBP2, TKTL1	624	24	4940	1.31944	1	0.911226	99.9987
Annotation Cluster 115	Enrichment Score: 0.870222133127958
Category	Term	Count	%	PValue	Genes	List Total	Pop Hits	Pop Total	Fold Enrichment	Bonferroni	Benjamini	FDR
GOTERM_BP_FAT	GO:0006690~icosanoid metabolic process	9	0.452034	0.0241216	FCER1A, PTGES2, TBXAS1, PDPN, ALOX12E, ALOX5AP, EDN1, LOC789588, HPGD	1003	32	8785	2.46339	1	0.368564	35.6666
GOTERM_BP_FAT	GO:0033559~unsaturated fatty acid metabolic process	9	0.452034	0.0241216	FCER1A, PTGES2, TBXAS1, PDPN, ALOX12E, ALOX5AP, EDN1, LOC789588, HPGD	1003	32	8785	2.46339	1	0.368564	35.6666
GOTERM_BP_FAT	GO:0046456~icosanoid biosynthetic process	6	0.301356	0.0825908	FCER1A, PTGES2, TBXAS1, ALOX5AP, EDN1, LOC789588	1003	21	8785	2.50249	1	0.674752	78.9277
GOTERM_BP_FAT	GO:0006636~unsaturated fatty acid biosynthetic process	6	0.301356	0.0825908	FCER1A, PTGES2, TBXAS1, ALOX5AP, EDN1, LOC789588	1003	21	8785	2.50249	1	0.674752	78.9277
GOTERM_BP_FAT	GO:0006631~fatty acid metabolic process	19	0.954294	0.0949329	FCER1A, CPT1B, SLC27A1, PTGES2, TNXB, TBXAS1, PDPN, ALOX12E, SCD, EDN1, SNCA, ACACA, FADS2, ALOX5AP, ETFDH, LOC789588, HSD17B4, ELOVL6, HPGD	1003	114	8785	1.45979	1	0.712643	83.5013
GOTERM_BP_FAT	GO:0006693~prostaglandin metabolic process	5	0.25113	0.120081	PTGES2, TBXAS1, PDPN, EDN1, HPGD	1003	17	8785	2.5761	1	0.772254	90.0831
GOTERM_BP_FAT	GO:0006692~prostanoid metabolic process	5	0.25113	0.120081	PTGES2, TBXAS1, PDPN, EDN1, HPGD	1003	17	8785	2.5761	1	0.772254	90.0831
GOTERM_BP_FAT	GO:0006633~fatty acid biosynthetic process	10	0.50226	0.169438	FCER1A, PTGES2, TBXAS1, ALOX5AP, SCD, EDN1, LOC789588, ACACA, FADS2, ELOVL6	1003	55	8785	1.5925	1	0.858667	96.5047
GOTERM_BP_FAT	GO:0043449~cellular alkene metabolic process	4	0.200904	0.240398	FCER1A, ALOX12E, ALOX5AP, LOC789588	1003	15	8785	2.33566	1	0.927242	99.3037
GOTERM_BP_FAT	GO:0006691~leukotriene metabolic process	4	0.200904	0.240398	FCER1A, ALOX12E, ALOX5AP, LOC789588	1003	15	8785	2.33566	1	0.927242	99.3037
GOTERM_BP_FAT	GO:0043450~alkene biosynthetic process	3	0.150678	0.274151	FCER1A, ALOX5AP, LOC789588	1003	9	8785	2.91957	1	0.946923	99.6936
GOTERM_BP_FAT	GO:0019370~leukotriene biosynthetic process	3	0.150678	0.274151	FCER1A, ALOX5AP, LOC789588	1003	9	8785	2.91957	1	0.946923	99.6936
GOTERM_BP_FAT	GO:0001516~prostaglandin biosynthetic process	3	0.150678	0.405041	PTGES2, TBXAS1, EDN1	1003	12	8785	2.18968	1	0.984636	99.9916
GOTERM_BP_FAT	GO:0046457~prostanoid biosynthetic process	3	0.150678	0.405041	PTGES2, TBXAS1, EDN1	1003	12	8785	2.18968	1	0.984636	99.9916
Annotation Cluster 116	Enrichment Score: 0.8692722445198577
Category	Term	Count	%	PValue	Genes	List Total	Pop Hits	Pop Total	Fold Enrichment	Bonferroni	Benjamini	FDR
GOTERM_BP_FAT	GO:0002252~immune effector process	18	0.904068	0.00181196	C7, ADORA3, CD8A, C3, CFB, SWAP70, RSAD2, LOC781004, KCNJ8, LAX1, FCN2, POLM, CFH, AICDA, HSPD1, FAS, INPP5D, PTX3, RAB27A	1003	70	8785	2.25224	0.996304	0.0701505	3.22313
GOTERM_BP_FAT	GO:0042113~B cell activation	9	0.452034	0.0398064	IL4, BAK1, LAX1, SWAP70, BCL11A, POLM, AICDA, HSPD1, ADA	1003	35	8785	2.25224	1	0.481456	51.9916
GOTERM_BP_FAT	GO:0002440~production of molecular mediator of immune response	6	0.301356	0.0461819	LAX1, SWAP70, POLM, AICDA, FAS, HSPD1	1003	18	8785	2.91957	1	0.519874	57.4351
GOTERM_BP_FAT	GO:0002377~immunoglobulin production	6	0.301356	0.0461819	LAX1, SWAP70, POLM, AICDA, FAS, HSPD1	1003	18	8785	2.91957	1	0.519874	57.4351
GOTERM_BP_FAT	GO:0002443~leukocyte mediated immunity	10	0.50226	0.0644138	C7, ADORA3, CD8A, C3, SWAP70, AICDA, INPP5D, FAS, HSPD1, RAB27A	1003	45	8785	1.94638	1	0.612287	69.9643
GOTERM_BP_FAT	GO:0002460~adaptive immune response based on somatic recombination of immune receptors built from immunoglobulin superfamily domains	9	0.452034	0.0786804	C7, CD8A, C3, SWAP70, AICDA, INPP5D, FAS, HSPD1, RAB27A	1003	40	8785	1.97071	1	0.668806	77.2447
GOTERM_BP_FAT	GO:0002449~lymphocyte mediated immunity	9	0.452034	0.0786804	C7, CD8A, C3, SWAP70, AICDA, INPP5D, FAS, HSPD1, RAB27A	1003	40	8785	1.97071	1	0.668806	77.2447
GOTERM_BP_FAT	GO:0002250~adaptive immune response	9	0.452034	0.0786804	C7, CD8A, C3, SWAP70, AICDA, INPP5D, FAS, HSPD1, RAB27A	1003	40	8785	1.97071	1	0.668806	77.2447
GOTERM_BP_FAT	GO:0019724~B cell mediated immunity	7	0.351582	0.167372	C7, C3, SWAP70, AICDA, INPP5D, FAS, HSPD1	1003	33	8785	1.85791	1	0.855873	96.3443
GOTERM_BP_FAT	GO:0016445~somatic diversification of immunoglobulins	4	0.200904	0.178259	SWAP70, POLM, AICDA, HSPD1	1003	13	8785	2.69499	1	0.871033	97.1179
GOTERM_BP_FAT	GO:0002204~somatic recombination of immunoglobulin genes during immune response	3	0.150678	0.22955	SWAP70, AICDA, HSPD1	1003	8	8785	3.28452	1	0.91926	99.1003
GOTERM_BP_FAT	GO:0045190~isotype switching	3	0.150678	0.22955	SWAP70, AICDA, HSPD1	1003	8	8785	3.28452	1	0.91926	99.1003
GOTERM_BP_FAT	GO:0002208~somatic diversification of immunoglobulins during immune response	3	0.150678	0.22955	SWAP70, AICDA, HSPD1	1003	8	8785	3.28452	1	0.91926	99.1003
GOTERM_BP_FAT	GO:0002381~immunoglobulin production during immune response	3	0.150678	0.274151	SWAP70, AICDA, HSPD1	1003	9	8785	2.91957	1	0.946923	99.6936
GOTERM_BP_FAT	GO:0016064~immunoglobulin mediated immune response	6	0.301356	0.298489	C7, C3, SWAP70, AICDA, INPP5D, HSPD1	1003	32	8785	1.64226	1	0.957358	99.8346
GOTERM_BP_FAT	GO:0002200~somatic diversification of immune receptors	4	0.200904	0.305394	SWAP70, POLM, AICDA, HSPD1	1003	17	8785	2.06088	1	0.959481	99.8616
GOTERM_BP_FAT	GO:0016447~somatic recombination of immunoglobulin gene segments	3	0.150678	0.362381	SWAP70, AICDA, HSPD1	1003	11	8785	2.38874	1	0.976855	99.9705
GOTERM_BP_FAT	GO:0016444~somatic cell DNA recombination	3	0.150678	0.523612	SWAP70, AICDA, HSPD1	1003	15	8785	1.75174	1	0.995985	99.9998
GOTERM_BP_FAT	GO:0002562~somatic diversification of immune receptors via germline recombination within a single locus	3	0.150678	0.523612	SWAP70, AICDA, HSPD1	1003	15	8785	1.75174	1	0.995985	99.9998
GOTERM_BP_FAT	GO:0006310~DNA recombination	3	0.150678	0.951926	SWAP70, AICDA, HSPD1	1003	40	8785	0.656904	1	1	100
Annotation Cluster 117	Enrichment Score: 0.8667206530918138
Category	Term	Count	%	PValue	Genes	List Total	Pop Hits	Pop Total	Fold Enrichment	Bonferroni	Benjamini	FDR
GOTERM_BP_FAT	GO:0050730~regulation of peptidyl-tyrosine phosphorylation	8	0.401808	0.0560053	FCER1A, IL4, CAV1, CD3E, HCLS1, IFNG, PDGFRB, CD4	1003	31	8785	2.26032	1	0.568078	64.6953
GOTERM_BP_FAT	GO:0050731~positive regulation of peptidyl-tyrosine phosphorylation	6	0.301356	0.0973166	FCER1A, IL4, CD3E, HCLS1, IFNG, CD4	1003	22	8785	2.38874	1	0.717659	84.2688
GOTERM_BP_FAT	GO:0046425~regulation of JAK-STAT cascade	5	0.25113	0.10046	IL4, CAV1, HCLS1, IFNG, F2R	1003	16	8785	2.7371	1	0.722541	85.2294
GOTERM_BP_FAT	GO:0046427~positive regulation of JAK-STAT cascade	4	0.200904	0.178259	IL4, HCLS1, IFNG, F2R	1003	13	8785	2.69499	1	0.871033	97.1179
GOTERM_BP_FAT	GO:0042509~regulation of tyrosine phosphorylation of STAT protein	4	0.200904	0.178259	IL4, CAV1, HCLS1, IFNG	1003	13	8785	2.69499	1	0.871033	97.1179
GOTERM_BP_FAT	GO:0042531~positive regulation of tyrosine phosphorylation of STAT protein	3	0.150678	0.362381	IL4, HCLS1, IFNG	1003	11	8785	2.38874	1	0.976855	99.9705
Annotation Cluster 118	Enrichment Score: 0.8560139804346841
Category	Term	Count	%	PValue	Genes	List Total	Pop Hits	Pop Total	Fold Enrichment	Bonferroni	Benjamini	FDR
GOTERM_BP_FAT	GO:0051085~chaperone mediated protein folding requiring cofactor	4	0.200904	0.121646	TOR2A, HSPH1, ERO1L, DNAJB1	1003	11	8785	3.18499	1	0.775644	90.397
GOTERM_BP_FAT	GO:0051084~'de novo' posttranslational protein folding	4	0.200904	0.149084	TOR2A, HSPH1, ERO1L, DNAJB1	1003	12	8785	2.91957	1	0.828229	94.5871
GOTERM_BP_FAT	GO:0006458~'de novo' protein folding	4	0.200904	0.149084	TOR2A, HSPH1, ERO1L, DNAJB1	1003	12	8785	2.91957	1	0.828229	94.5871
Annotation Cluster 119	Enrichment Score: 0.8540259245013567
Category	Term	Count	%	PValue	Genes	List Total	Pop Hits	Pop Total	Fold Enrichment	Bonferroni	Benjamini	FDR
GOTERM_MF_FAT	GO:0043169~cation binding	296	14.8669	0.0112002	CYP3A4, GDA, S100A8, MASP1, AIF1, S100A9, FSTL1, PDLIM1, EPT1, ZNRF1, SSR1, FAH, PLOD1, STAC, APOE, PLOD2, NT5C2, CCBE1, ERAP2, CDH26, DDAH1, PLS3, S100A2, ROCK2, NUDT13, ZNF502, COLEC12, SAG, PGM3, LETM1, UHRF2, MTF2, LOC788801, EIF2S2, F2, LOC789588, ADAMTS1, TGFB1I1, ADAMTS2, ADAMTS5, ADAMTS4, ZNF613, SCN1B, CRELD2, CYP51A1, ASAP2, SFXN3, CACNB3, SFXN1, SFXN2, CALR, ACAT1, ADA, CALU, ZNF70, TD…	1013	2415	9249	1.11908	0.999972	0.246561	16.1644
GOTERM_MF_FAT	GO:0043167~ion binding	297	14.9171	0.0156712	CYP3A4, GDA, S100A8, MASP1, AIF1, S100A9, FSTL1, PDLIM1, EPT1, ZNRF1, SSR1, FAH, PLOD1, STAC, APOE, PLOD2, NT5C2, CCBE1, ERAP2, CDH26, DDAH1, PLS3, S100A2, ROCK2, NUDT13, ZNF502, COLEC12, SAG, PGM3, LETM1, UHRF2, MTF2, LOC788801, EIF2S2, F2, LOC789588, ADAMTS1, TGFB1I1, ADAMTS2, ADAMTS5, ADAMTS4, ZNF613, SCN1B, CRELD2, CYP51A1, ASAP2, SFXN3, CACNB3, SFXN1, SFXN2, CALR, ACAT1, ADA, CALU, ZNF70, TD…	1013	2439	9249	1.11181	1	0.307356	21.9056
GOTERM_MF_FAT	GO:0046872~metal ion binding	291	14.6158	0.0163638	CYP3A4, GDA, S100A8, MASP1, AIF1, S100A9, FSTL1, PDLIM1, EPT1, ZNRF1, SSR1, FAH, PLOD1, STAC, APOE, PLOD2, NT5C2, CCBE1, ERAP2, CDH26, DDAH1, PLS3, S100A2, ROCK2, NUDT13, ZNF502, COLEC12, SAG, PGM3, LETM1, UHRF2, MTF2, LOC788801, EIF2S2, F2, LOC789588, ADAMTS1, TGFB1I1, ADAMTS2, ADAMTS5, ADAMTS4, ZNF613, SCN1B, CRELD2, CYP51A1, ASAP2, SFXN3, CACNB3, SFXN1, SFXN2, CALR, ACAT1, ADA, CALU, ZNF70, TD…	1013	2387	9249	1.11308	1	0.312195	22.7614
SP_PIR_KEYWORDS	metal-binding	136	6.83074	0.610978	CYP3A4, IMPAD1, LMO1, LMO2, ATOX1, MMP9, IDE, LMO7, PDLIM1, EPT1, MMP3, MMP2, FAH, CISD1, STAC, ZNF187, PLOD1, GATA3, NT5C2, RBCK1, ERAP2, LOX, SAR1B, BPNT1, DDAH1, PDXK, KCND1, ROCK2, MTA3, COLEC12, FBP2, PGM3, UHRF2, CPE, MTF2, LOC788801, EIF2S2, CALR3, ADAMTS1, TGFB1I1, ADAMTS2, ADAMTS5, ADAMTS4, XDH, ZNF613, PAM, ARFGAP3, CYP51A1, TIMP2, CALR, ACAT1, TIMP1, ECE2, TRAF5, FGD3, CPA5, CRIP2, ACA…	1001	1010	7349	0.98858	1	0.980252	99.9999
SP_PIR_KEYWORDS	zinc	88	4.41989	0.706635	CHURC1, LMO1, LMO2, MMP9, IDE, LMO7, ANPEP, PDLIM1, MMP3, MMP2, STAC, ZNF187, GATA3, RBCK1, NOS3, MICAL1, ERAP2, NR2F2, DDAH1, MT3, EGR1, ZCCHC3, PDXK, KCND1, ROCK2, MTA3, MMP19, FBLIM1, PRKCH, MBNL2, ARHGAP29, MMP14, MMP13, GTF2B, LAP3, UHRF2, CPE, MTF2, EIF2S2, ZNF713, CALR3, AICDA, TGFB1I1, ADAMTS2, ADAMTS5, ADAMTS4, ZNF613, ALPL, PRKCZ, PAM, SLC39A14, ARFGAP3, THAP5, FHL3, ZBTB16, CALR, TIMP2…	1001	670	7349	0.964278	1	0.991305	100
GOTERM_MF_FAT	GO:0046914~transition metal ion binding	175	8.78955	0.855065	CYP3A4, GDA, LMO1, LMO2, ATOX1, MMP9, IDE, LMO7, PDLIM1, EPT1, ZNRF1, MMP3, MMP2, APOBEC3B, CISD1, STAC, ZNF187, PLOD1, PLOD2, GATA3, RBCK1, ERAP2, LOX, ASPH, DDAH1, PDXK, KCND1, ROCK2, MTA3, NEIL1, ZNF502, TCN2, UHRF2, CPE, MTF2, LOC788801, EIF2S2, LOC789588, ADAMTS1, CALR3, TGFB1I1, ADAMTS2, ADAMTS5, ADAMTS4, ZNF613, XDH, PAM, TSHZ2, ARFGAP3, CYP51A1, ASAP2, SFXN3, SFXN1, SFXN2, CALR, ADA, ECE2…	1013	1698	9249	0.940991	1	0.999885	100
GOTERM_MF_FAT	GO:0008270~zinc ion binding	126	6.32848	0.991713	GDA, LMO1, LMO2, MMP9, IDE, LMO7, PDLIM1, MMP3, ZNRF1, MMP2, APOBEC3B, STAC, ZNF187, GATA3, RBCK1, ERAP2, DDAH1, PDXK, KCND1, ROCK2, MTA3, NEIL1, ZNF502, UHRF2, CPE, MTF2, EIF2S2, LOC789588, CALR3, ADAMTS1, TGFB1I1, ADAMTS2, ADAMTS5, ADAMTS4, ZNF613, PAM, ARFGAP3, TSHZ2, ASAP2, CALR, ADA, ECE2, SLC30A3, TRAF5, ZNF70, TDRD1, FGD3, SLC30A7, ZNF423, ADAM28, CPA5, CRIP2, KLF11, BMX, ZNF521, ZBTB43, S…	1013	1367	9249	0.841564	1	1	100
Annotation Cluster 120	Enrichment Score: 0.8497091065706398
Category	Term	Count	%	PValue	Genes	List Total	Pop Hits	Pop Total	Fold Enrichment	Bonferroni	Benjamini	FDR
GOTERM_CC_FAT	GO:0032432~actin filament bundle	4	0.200904	0.141348	ACTG2, ACTA2, FERMT2, FHL3, MYH10	850	11	6966	2.98011	1	0.602168	87.8228
GOTERM_CC_FAT	GO:0042641~actomyosin	4	0.200904	0.141348	ACTG2, ACTA2, FERMT2, FHL3, MYH10	850	11	6966	2.98011	1	0.602168	87.8228
GOTERM_CC_FAT	GO:0001725~stress fiber	4	0.200904	0.141348	ACTG2, ACTA2, FERMT2, FHL3, MYH10	850	11	6966	2.98011	1	0.602168	87.8228
Annotation Cluster 121	Enrichment Score: 0.8458504806369453
Category	Term	Count	%	PValue	Genes	List Total	Pop Hits	Pop Total	Fold Enrichment	Bonferroni	Benjamini	FDR
GOTERM_BP_FAT	GO:0006576~biogenic amine metabolic process	10	0.50226	0.0996728	ACHE, APOA1, LY6E, EPAS1, GATA3, MAOA, SNCA, FABP3, IDO1, ADC	1003	49	8785	1.78749	1	0.722392	84.9943
GOTERM_BP_FAT	GO:0042415~norepinephrine metabolic process	3	0.150678	0.102828	LY6E, EPAS1, GATA3	1003	5	8785	5.25523	1	0.728499	85.9165
GOTERM_BP_FAT	GO:0009712~catechol metabolic process	5	0.25113	0.163648	LY6E, EPAS1, GATA3, MAOA, SNCA	1003	19	8785	2.30493	1	0.850865	96.0373
GOTERM_BP_FAT	GO:0034311~diol metabolic process	5	0.25113	0.163648	LY6E, EPAS1, GATA3, MAOA, SNCA	1003	19	8785	2.30493	1	0.850865	96.0373
GOTERM_BP_FAT	GO:0006584~catecholamine metabolic process	5	0.25113	0.163648	LY6E, EPAS1, GATA3, MAOA, SNCA	1003	19	8785	2.30493	1	0.850865	96.0373
GOTERM_BP_FAT	GO:0018958~phenol metabolic process	5	0.25113	0.187274	LY6E, EPAS1, GATA3, MAOA, SNCA	1003	20	8785	2.18968	1	0.880005	97.6386
Annotation Cluster 122	Enrichment Score: 0.8441482200030692
Category	Term	Count	%	PValue	Genes	List Total	Pop Hits	Pop Total	Fold Enrichment	Bonferroni	Benjamini	FDR
INTERPRO	IPR011497:Protease inhibitor, Kazal-type	5	0.25113	0.107993	SPOCK2, IGFBP7, FSTL1, SLCO3A1, SLCO2A1	1235	14	9171	2.65211	1	0.945109	85.5023
INTERPRO	IPR002350:Proteinase inhibitor I1, Kazal	7	0.351582	0.109465	SPOCK2, IGFBP7, FST, FSTL1, SLCO3A1, SPARC, SLCO2A1	1235	25	9171	2.07926	1	0.942744	85.9013
INTERPRO	IPR015369:Follistatin/Osteonectin-like EGF domain	3	0.150678	0.137024	FST, FSTL1, SPARC	1235	5	9171	4.45555	1	0.964872	91.7115
INTERPRO	IPR003645:Follistatin-like, N-terminal	3	0.150678	0.137024	FST, FSTL1, SPARC	1235	5	9171	4.45555	1	0.964872	91.7115
SMART	SM00280:KAZAL	7	0.351582	0.151278	SPOCK2, IGFBP7, FST, FSTL1, SLCO3A1, SPARC, SLCO2A1	644	25	4364	1.89739	1	0.826154	88.6755
SMART	SM00274:FOLN	3	0.150678	0.159827	FST, FSTL1, SPARC	644	5	4364	4.06584	1	0.833246	90.1002
UP_SEQ_FEATURE	domain:Kazal-like	3	0.150678	0.22976	FSTL1, SLCO3A1, SPARC	737	7	5635	3.2768	1	0.999912	98.8208
Annotation Cluster 123	Enrichment Score: 0.8426954860633343
Category	Term	Count	%	PValue	Genes	List Total	Pop Hits	Pop Total	Fold Enrichment	Bonferroni	Benjamini	FDR
INTERPRO	IPR008983:Tumour necrosis factor-like	8	0.401808	0.0511048	CBLN3, C1QTNF5, TNF, C1QTNF6, C1QTNF1, FASLG, COL8A1, LTA	1235	26	9171	2.2849	1	0.84258	58.7881
INTERPRO	IPR001073:Complement C1q protein	5	0.25113	0.216192	CBLN3, C1QTNF5, C1QTNF6, C1QTNF1, COL8A1	1235	18	9171	2.06275	1	0.991145	98.3696
SMART	SM00110:C1Q	5	0.25113	0.268295	CBLN3, C1QTNF5, C1QTNF6, C1QTNF1, COL8A1	644	18	4364	1.88233	1	0.923497	98.4209
Annotation Cluster 124	Enrichment Score: 0.8391853145942431
Category	Term	Count	%	PValue	Genes	List Total	Pop Hits	Pop Total	Fold Enrichment	Bonferroni	Benjamini	FDR
UP_SEQ_FEATURE	domain:LIM zinc-binding 1	6	0.301356	0.0915354	LMO1, LMO2, CRIP2, FHL3, FBLIM1, TGFB1I1	737	19	5635	2.41448	1	0.995053	80.4635
UP_SEQ_FEATURE	domain:LIM zinc-binding 2	6	0.301356	0.0915354	LMO1, LMO2, CRIP2, FHL3, FBLIM1, TGFB1I1	737	19	5635	2.41448	1	0.995053	80.4635
INTERPRO	IPR001781:Zinc finger, LIM-type	10	0.50226	0.128602	LMO1, LMO2, CRIP2, FHL3, FBLIM1, LIMD2, LMO7, MICAL1, PDLIM1, TGFB1I1	1235	44	9171	1.68771	1	0.959748	90.2332
SP_PIR_KEYWORDS	LIM domain	10	0.50226	0.135186	LMO1, LMO2, CRIP2, FHL3, FBLIM1, LIMD2, LMO7, MICAL1, PDLIM1, TGFB1I1	1001	44	7349	1.66856	1	0.728711	87.6718
SMART	SM00132:LIM	10	0.50226	0.190361	LMO1, LMO2, CRIP2, FHL3, FBLIM1, LIMD2, LMO7, MICAL1, PDLIM1, TGFB1I1	644	44	4364	1.54009	1	0.850507	93.9448
UP_SEQ_FEATURE	domain:LIM zinc-binding 3	3	0.150678	0.332624	FHL3, FBLIM1, TGFB1I1	737	9	5635	2.54862	1	0.999997	99.897
[truncated: 1,551 more rows]
