# Supplementary material for: Immunological Response to Single Pathogen Challenge with Agents of the Bovine Respiratory Disease Complex: An RNA-Sequence Analysis of the Bronchial Lymph Node Transcriptome
Source: PLoS One. 2015 Jun 29;10(6):e0131459. doi: 10.1371/journal.pone.0131459 (PMC4484807; doi:10.1371/journal.pone.0131459)
Supplement: S10 Table — Tabs are identified according to the type of DAVID analysis performed. (XLSX) [file pone.0131459.s010.xlsx]

## Sheet: DE_genes
gene_id	locus	sample_1	sample_2	value_1	value_2	log2(fold_change)	q_value	significant
PI3	13:74272868-74274941	MYCO	CTRL	28.629	0.539894	-5.72866	0.00448667	yes
LOC784768	3:57499183-57531728	MYCO	CTRL	2.19504	0.0975916	-4.49135	0.00448667	yes
MSLN	25:649252-652836	MYCO	CTRL	1.91155	0.0864076	-4.46744	0.0160935	yes
LOC100336999	12:71321404-71535528	MYCO	CTRL	7.75681	0.523053	-3.89043	0.00448667	yes
LOC100337129	12:73516166-73569768	MYCO	CTRL	11.8711	0.902883	-3.71677	0.00448667	yes
CD177	18:51877253-51888123	MYCO	CTRL	0.75925	0.0672946	-3.49601	0.0468544	yes
BMPR1B	6:30798827-30850160	MYCO	CTRL	0.46526	0.0435696	-3.41664	0.0108337	yes
C1QTNF3	20:39760049-39792325	MYCO	CTRL	0.752616	0.0758468	-3.31075	0.00448667	yes
PI16	23:10836789-10848749	MYCO	CTRL	5.67994	0.689506	-3.04224	0.00448667	yes
COL8A1	1:43541935-43717620	MYCO	CTRL	1.35705	0.170092	-2.99609	0.00448667	yes
LRG1	7:20812033-20814992	MYCO	CTRL	1.65736	0.208729	-2.98918	0.00448667	yes
PGLYRP1	18:53946096-53948158	MYCO	CTRL	5.56009	0.734601	-2.92008	0.00448667	yes
TSPAN1	3:100498106-100503197	MYCO	CTRL	2.59965	0.3812	-2.7697	0.00448667	yes
MMP13	15:5912036-5922736	MYCO	CTRL	3.22903	0.504031	-2.67951	0.00448667	yes
CTHRC1	14:63311959-63328221	MYCO	CTRL	0.954691	0.16131	-2.56519	0.0108337	yes
SLC6A15	5:14572185-14604741	MYCO	CTRL	0.974036	0.179162	-2.44271	0.00448667	yes
MMP3	15:6028010-6034595	MYCO	CTRL	0.873833	0.165063	-2.40434	0.00448667	yes
ITGBL1	12:81873526-82108677	MYCO	CTRL	1.29431	0.244594	-2.40372	0.00448667	yes
SFRP4	4:50009871-50020466	MYCO	CTRL	3.3501	0.646668	-2.37311	0.00448667	yes
LOC100300028	7:15689614-15704694	MYCO	CTRL	78.0144	15.1467	-2.36474	0.00448667	yes
PRSS35	9:23710553-23729764	MYCO	CTRL	0.63435	0.128078	-2.30826	0.00448667	yes
CYP24A1	13:82350502-82368773	MYCO	CTRL	1.67943	0.345934	-2.2794	0.00448667	yes
S100A2	3:16869283-16872613	MYCO	CTRL	5.78785	1.21738	-2.24925	0.0108337	yes
CTSL1	8:82365268-82371041	MYCO	CTRL	4.04808	0.859946	-2.23492	0.00448667	yes
NEFL	8:73180098-73184369	MYCO	CTRL	1.25458	0.280275	-2.1623	0.00448667	yes
TF	1:136683310-136722309	MYCO	CTRL	4.16372	0.935674	-2.1538	0.00448667	yes
EBD	27:6170809-6171207	MYCO	CTRL	6.14789	1.38949	-2.14553	0.0160935	yes
TGM3	13:53261631-53304213	MYCO	CTRL	1.54056	0.377268	-2.02979	0.00448667	yes
MGAM	4:106123752-106206202	MYCO	CTRL	0.352029	0.0885993	-1.99033	0.00448667	yes
IRG1	12:52421740-52424165	MYCO	CTRL	5.19029	1.31093	-1.98522	0.00448667	yes
LOC100294973	1:93789330-93798359	MYCO	CTRL	6.58214	1.72466	-1.93224	0.0484308	yes
FAM19A4	22:32698748-32906212	MYCO	CTRL	2.42545	0.64094	-1.91999	0.00448667	yes
LOC521568	12:71903904-72005987	MYCO	CTRL	3.09232	0.818372	-1.91786	0.00448667	yes
LOC524810	21:71453611-71596379	MYCO	CTRL	1940.78	525.018	-1.8862	0.00448667	yes
LOC404107	27:5327038-5328962	MYCO	CTRL	7.90083	2.14552	-1.88068	0.0108337	yes
FAM84A	11:83655858-83659066	MYCO	CTRL	0.872947	0.248428	-1.81307	0.0160935	yes
PIGR	16:4533502-4551521	MYCO	CTRL	4.7599	1.36677	-1.80016	0.00448667	yes
VCAN	7:85666057-85782896	MYCO	CTRL	0.651188	0.190355	-1.77438	0.00448667	yes
PLIN4	7:20831521-20841692	MYCO	CTRL	0.438369	0.130544	-1.74762	0.0416725	yes
SNCA	6:36284033-36432430	MYCO	CTRL	10.5746	3.16158	-1.74189	0.00448667	yes
SFRP2	17:3829563-3838138	MYCO	CTRL	10.7974	3.33529	-1.69479	0.00448667	yes
NOV	14:47005556-47013935	MYCO	CTRL	5.48749	1.70689	-1.68478	0.00448667	yes
KIAA1199	21:27232611-27297774	MYCO	CTRL	11.5106	3.58184	-1.68419	0.00448667	yes
LOC100337426	3:53472278-53472889	MYCO	CTRL	7.31036	2.29321	-1.67257	0.00809071	yes
C28H10orf99	28:39458541-39468631	MYCO	CTRL	1.923	0.603531	-1.67186	0.0133991	yes
ACTG2	11:10717557-10740084	MYCO	CTRL	15.9119	5.12291	-1.63507	0.00448667	yes
S100A8	3:17146917-17147899	MYCO	CTRL	21.9802	7.12179	-1.62589	0.00448667	yes
IL6	8:23287272-23287909	MYCO	CTRL	2.40936	0.78433	-1.61912	0.00448667	yes
PAMR1	15:66754733-66832246	MYCO	CTRL	0.999485	0.326587	-1.61372	0.0108337	yes
MOK	21:68706702-68736526	MYCO	CTRL	1.06437	0.347796	-1.61368	0.0212381	yes
TM4SF20	2:116332502-116343431	MYCO	CTRL	16.4146	5.4878	-1.58068	0.00448667	yes
COL3A1	2:7317286-7356904	MYCO	CTRL	80.0453	26.7921	-1.57901	0.00448667	yes
ELFN2	5:76173494-76175969	MYCO	CTRL	3.73096	1.26542	-1.55993	0.00448667	yes
LOC100847582	19:37088245-37105761	MYCO	CTRL	37.2303	12.8514	-1.53456	0.00448667	yes
PERP	9:76937940-76952270	MYCO	CTRL	5.01757	1.73894	-1.52878	0.00448667	yes
LOC528412	12:73167278-73190990	MYCO	CTRL	2.94917	1.03219	-1.51461	0.0108337	yes
COL1A1	19:37088245-37105761	MYCO	CTRL	32.886	11.7067	-1.49014	0.00448667	yes
MUC1	3:15482847-15486946	MYCO	CTRL	0.774315	0.283543	-1.44935	0.0435471	yes
LOC788414	2:136768698-136781478	MYCO	CTRL	1.15923	0.427515	-1.43913	0.00809071	yes
LOC100300896	11:44706972-44717428	MYCO	CTRL	6.10115	2.25234	-1.43766	0.00448667	yes
LRRC71	3:13973122-13985542	MYCO	CTRL	0.489283	0.18175	-1.42871	0.0307294	yes
LOC100847574	1:93807460-93828805	MYCO	CTRL	23.6031	8.77542	-1.42743	0.00448667	yes
CCL1	19:16110979-16114251	MYCO	CTRL	2.69947	1.02927	-1.39105	0.0416725	yes
LOC520070	29:45015999-45018614	MYCO	CTRL	2.5551	0.987892	-1.37095	0.00448667	yes
BGN	X:39639905-39653691	MYCO	CTRL	17.8346	6.98256	-1.35285	0.00448667	yes
PROM1	6:115981182-116105180	MYCO	CTRL	1.33253	0.525432	-1.3426	0.00448667	yes
CXCL6	6:90645963-90648082	MYCO	CTRL	2.47467	0.976777	-1.34113	0.0212381	yes
FBLN1	5:116616199-116695696	MYCO	CTRL	6.95645	2.75873	-1.33435	0.00448667	yes
LOC100300806	7:15707337-15720295	MYCO	CTRL	241.368	96.2115	-1.32695	0.00448667	yes
COL1A2	4:11624469-11661163	MYCO	CTRL	45.9061	19.0414	-1.26955	0.00448667	yes
MXRA5	X:138878611-138902892	MYCO	CTRL	0.990619	0.41918	-1.24076	0.00448667	yes
LOC100337108	12:72728426-72741314	MYCO	CTRL	35.0341	14.9166	-1.23185	0.00448667	yes
MMP9	13:75466512-75473824	MYCO	CTRL	4.44492	1.90008	-1.2261	0.00448667	yes
LOXL2	8:71278581-71390893	MYCO	CTRL	2.46657	1.05687	-1.2227	0.00448667	yes
DPT	16:37106631-37143040	MYCO	CTRL	5.58341	2.39392	-1.22177	0.00448667	yes
LUM	5:21037442-21044658	MYCO	CTRL	15.3838	6.63259	-1.21376	0.00448667	yes
LOC100337244	12:74550305-74760765	MYCO	CTRL	5.00187	2.16652	-1.20709	0.00448667	yes
SERPINF1	19:23418895-23430668	MYCO	CTRL	4.15294	1.80115	-1.20521	0.00809071	yes
NGFRAP1	X:57269279-57270784	MYCO	CTRL	16.1165	7.10907	-1.18081	0.00448667	yes
CTXN3	7:27491081-27503415	MYCO	CTRL	3.54382	1.57807	-1.16714	0.0108337	yes
POSTN	12:24241936-24276489	MYCO	CTRL	8.49615	3.79152	-1.16403	0.00448667	yes
COL4A1	12:88876124-89009422	MYCO	CTRL	14.3828	6.49502	-1.14694	0.00448667	yes
ITGA11	10:15102957-15236791	MYCO	CTRL	0.733092	0.3333	-1.13717	0.0307294	yes
S100A9	3:17176216-17178919	MYCO	CTRL	13.4503	6.37029	-1.0782	0.0160935	yes
STAC	22:10160884-10273698	MYCO	CTRL	1.5202	0.725423	-1.06736	0.0324219	yes
LYPD1	2:65216982-65279824	MYCO	CTRL	1.33594	0.639691	-1.0624	0.0189013	yes
LOC100336084	23:25481701-25490244	MYCO	CTRL	67.5951	32.4115	-1.06041	0.0133991	yes
MUC13	1:69934406-69959162	MYCO	CTRL	2.41199	1.16148	-1.05426	0.0133991	yes
LOC613401	4:31693559-31694054	MYCO	CTRL	12.8981	6.21847	-1.05253	0.0496543	yes
LOC100137759	29:51291087-51309821	MYCO	CTRL	2.02492	0.984825	-1.03993	0.0133991	yes
COL6A3	3:117408826-117482330	MYCO	CTRL	7.01001	3.41054	-1.03942	0.00448667	yes
FMOD	16:925080-935131	MYCO	CTRL	6.93507	3.40889	-1.02461	0.00448667	yes
FOXP3	X:92369103-92375461	MYCO	CTRL	13.2464	6.51293	-1.02422	0.00448667	yes
LOC100848883	16:51238724-51241698	MYCO	CTRL	5.60334	2.76147	-1.02085	0.00448667	yes
LOC100336251	18:34193718-34215940	MYCO	CTRL	5.16669	2.58051	-1.00158	0.0402884	yes
HSPA6	3:8027759-8029969	MYCO	CTRL	5.50381	2.77428	-0.988319	0.00448667	yes
NMNAT2	16:65778439-65940677	MYCO	CTRL	3.90422	1.9756	-0.982738	0.0236896	yes
MMP2	18:23828618-23855027	MYCO	CTRL	8.09381	4.0961	-0.982567	0.00448667	yes
COL21A1	23:3946456-4181456	MYCO	CTRL	1.2073	0.611494	-0.981377	0.0402884	yes
IL17RE	22:16885754-16896957	MYCO	CTRL	2.27308	1.15161	-0.980995	0.0212381	yes
PCDH1	7:54624663-54639999	MYCO	CTRL	1.28558	0.65412	-0.974798	0.0453732	yes
COL4A2	12:89056706-89166036	MYCO	CTRL	9.84397	5.01792	-0.972151	0.00448667	yes
VDR	5:32550520-32606144	MYCO	CTRL	3.66986	1.87545	-0.968491	0.0484308	yes
LOC523126	12:75664651-75870598	MYCO	CTRL	8.71913	4.48668	-0.958535	0.00448667	yes
CFH	16:6052922-6122554	MYCO	CTRL	8.42835	4.33975	-0.957637	0.00448667	yes
PROS1	1:37803107-37866950	MYCO	CTRL	44.3219	22.9588	-0.94897	0.00448667	yes
A2M	5:101298126-101346611	MYCO	CTRL	96.9773	50.4758	-0.942056	0.00448667	yes
PLOD2	1:123322466-123444003	MYCO	CTRL	4.38234	2.28352	-0.94044	0.00448667	yes
PLA2G5	2:133224530-133246491	MYCO	CTRL	8.39013	4.39347	-0.933334	0.0212381	yes
AQP1	4:65830988-65845186	MYCO	CTRL	28.7482	15.1612	-0.92309	0.00448667	yes
LOC511180	18:56740588-56746722	MYCO	CTRL	10.9605	5.79806	-0.918667	0.00448667	yes
MEST	4:95066961-95079691	MYCO	CTRL	7.96439	4.21458	-0.918175	0.00448667	yes
COL5A2	2:7139408-7300563	MYCO	CTRL	5.84471	3.11085	-0.909823	0.00448667	yes
DLL4	10:36577284-36586360	MYCO	CTRL	5.91496	3.16717	-0.901173	0.00448667	yes
VLDLR	8:42109678-42141155	MYCO	CTRL	4.99668	2.6788	-0.899384	0.00448667	yes
MARCO	2:71099066-71134082	MYCO	CTRL	255.696	137.187	-0.898288	0.00448667	yes
NPL	16:65330450-65369037	MYCO	CTRL	17.0525	9.19394	-0.891224	0.00448667	yes
JAM3	29:33546269-33577319	MYCO	CTRL	6.69077	3.62794	-0.883021	0.00448667	yes
PODN	3:93728449-93751305	MYCO	CTRL	3.16181	1.72036	-0.878041	0.0385573	yes
PVR	18:52760785-52841330	MYCO	CTRL	7.53379	4.11068	-0.873999	0.00448667	yes
SPARC	7:64862329-64900826	MYCO	CTRL	175.478	97.0382	-0.854662	0.00448667	yes
PLA2G2D1	2:133176654-133189041	MYCO	CTRL	189.757	105.2	-0.851017	0.00448667	yes
LOC100337216	12:74293958-74375569	MYCO	CTRL	7.50298	4.18722	-0.84147	0.0108337	yes
ASB9	X:135474902-135503510	MYCO	CTRL	5.10353	2.85792	-0.836527	0.0346183	yes
LOC100848815	23:25424426-25430183	MYCO	CTRL	485.552	273.031	-0.830561	0.0212381	yes
SDC1	11:78687992-78719307	MYCO	CTRL	4.86657	2.75791	-0.819327	0.0236896	yes
GPT2	18:15370926-15405215	MYCO	CTRL	8.47533	4.80311	-0.8193	0.00448667	yes
LOC511937	14:43743183-43744285	MYCO	CTRL	16.8868	9.80706	-0.784005	0.00809071	yes
DGAT2	15:55940756-55973229	MYCO	CTRL	7.05397	4.10516	-0.780998	0.0484308	yes
LOC505037	7:11439933-11494856	MYCO	CTRL	6.2648	3.67813	-0.768296	0.00809071	yes
SLCO2A1	1:136435601-136528514	MYCO	CTRL	8.08673	4.76083	-0.764342	0.0160935	yes
H19	29:50150774-50153147	MYCO	CTRL	68.3038	40.422	-0.756826	0.00448667	yes
ANXA4	11:68070486-68144492	MYCO	CTRL	38.3035	23.0062	-0.735453	0.00448667	yes
C3H1orf162	3:31991177-31996055	MYCO	CTRL	25.3415	15.2255	-0.735017	0.0108337	yes
LOC539690	13:42244261-42247598	MYCO	CTRL	17.6626	10.6204	-0.733855	0.00448667	yes
CCL8	19:16137671-16139707	MYCO	CTRL	17.0118	10.2341	-0.733153	0.0484308	yes
PKHD1L1	14:57049152-57216589	MYCO	CTRL	1.0736	0.648916	-0.726354	0.0324219	yes
COL16A1	2:122557457-122611965	MYCO	CTRL	4.43859	2.68923	-0.722906	0.0133991	yes
PLA2R1	2:36373938-36508295	MYCO	CTRL	3.96092	2.40572	-0.719365	0.00448667	yes
CDH5	18:34260149-34275150	MYCO	CTRL	13.834	8.40619	-0.718692	0.00448667	yes
PDCD1	3:121284543-121294475	MYCO	CTRL	47.0878	28.864	-0.706086	0.00448667	yes
LOC507443	19:54537797-54543761	MYCO	CTRL	11.0956	6.80804	-0.704674	0.0468544	yes
ABCA1	8:96274034-96390357	MYCO	CTRL	14.1425	8.7299	-0.695999	0.00448667	yes
TMEM176A	4:114208684-114212313	MYCO	CTRL	20.4112	12.6004	-0.69589	0.0236896	yes
LOC100337081	7:18589085-18684360	MYCO	CTRL	10.6214	6.59377	-0.6878	0.0108337	yes
FBN1	10:61877807-62142171	MYCO	CTRL	5.82325	3.62719	-0.682971	0.00448667	yes
ST6GALNAC6	11:98567330-98580373	MYCO	CTRL	11.7179	7.29949	-0.682851	0.0108337	yes
ELN	25:33788121-33820666	MYCO	CTRL	18.0521	11.2621	-0.680685	0.00448667	yes
MMP14	10:21806053-21814533	MYCO	CTRL	34.8701	21.9069	-0.670604	0.00448667	yes
ABCC9	5:88677585-88834493	MYCO	CTRL	1.82925	1.1504	-0.66912	0.0346183	yes
TMEM37	2:71607733-71613808	MYCO	CTRL	21.6927	13.6487	-0.66845	0.0307294	yes
LOC781339	12:69574458-69576660	MYCO	CTRL	15.8113	9.98068	-0.66375	0.00448667	yes
CAPG	11:49423730-49438680	MYCO	CTRL	23.1477	14.6227	-0.662663	0.0189013	yes
LRP1	5:56561574-56641157	MYCO	CTRL	9.34398	5.91605	-0.659404	0.00448667	yes
VCAM1	3:42743607-42766060	MYCO	CTRL	24.0359	15.2662	-0.654846	0.00448667	yes
PLXNA1	22:60913458-60946559	MYCO	CTRL	3.81122	2.42854	-0.650165	0.0402884	yes
MZB1	7:52285861-52288594	MYCO	CTRL	299.498	191.446	-0.645607	0.00448667	yes
CPT1C	18:56547747-56566825	MYCO	CTRL	13.4563	8.6417	-0.638896	0.0133991	yes
TBXAS1	4:104133818-104307006	MYCO	CTRL	12.2017	7.86682	-0.633225	0.0402884	yes
EIF5B	11:4425371-4618883	MYCO	CTRL	21.1964	13.6881	-0.630898	0.0189013	yes
FAM46C	3:25664369-25722926	MYCO	CTRL	22.4025	14.4749	-0.630106	0.0385573	yes
STAB2	5:67612322-67784873	MYCO	CTRL	14.3058	9.24681	-0.629577	0.00809071	yes
SLC1A4	11:63337654-63367593	MYCO	CTRL	16.684	10.7921	-0.628488	0.00448667	yes
SDC3	2:123221290-123245513	MYCO	CTRL	52.3137	33.967	-0.623053	0.00448667	yes
LAG3	5:104029080-104035920	MYCO	CTRL	22.147	14.3814	-0.622909	0.0133991	yes
F13A1	23:48633935-48776698	MYCO	CTRL	6.26013	4.07432	-0.619633	0.0261282	yes
CCDC80	1:57819989-57855630	MYCO	CTRL	11.0842	7.2182	-0.618794	0.0108337	yes
CHI3L2	3:32268063-32284490	MYCO	CTRL	16.3877	10.7371	-0.610005	0.0324219	yes
GPBAR1	2:107011784-107014997	MYCO	CTRL	22.4856	14.7806	-0.605295	0.0367525	yes
IL32	25:2492652-2497188	MYCO	CTRL	116.567	77.5484	-0.587987	0.00448667	yes
ABCG1	1:143988981-144053577	MYCO	CTRL	21.2902	14.2594	-0.578272	0.0133991	yes
SIRPA	13:53668953-53710782	MYCO	CTRL	50.0186	33.6148	-0.573367	0.00448667	yes
DCN	5:21080009-21119087	MYCO	CTRL	96.9047	65.166	-0.572447	0.00809071	yes
ADA	13:73750478-73773897	MYCO	CTRL	179.557	120.885	-0.57081	0.00448667	yes
BCL3	18:52922245-52931573	MYCO	CTRL	53.5931	36.1328	-0.56874	0.00448667	yes
CTSC	29:7433481-7473316	MYCO	CTRL	250.862	169.544	-0.565238	0.00448667	yes
TMEM2	8:48223035-48303993	MYCO	CTRL	28.717	19.4413	-0.562782	0.00448667	yes
HTRA1	26:42659746-42717176	MYCO	CTRL	31.4266	21.2795	-0.562519	0.0160935	yes
PECAM1	19:49175890-49238414	MYCO	CTRL	29.0146	19.6469	-0.562478	0.0108337	yes
FN1	2:103881401-103950562	MYCO	CTRL	24.2158	16.4325	-0.559399	0.00448667	yes
TIE1	3:103278177-103297710	MYCO	CTRL	9.62069	6.53622	-0.557684	0.0402884	yes
LOC511353	17:72815146-72817914	MYCO	CTRL	120.967	82.5916	-0.550544	0.00809071	yes
LOC100847896	15:75852455-75884483	MYCO	CTRL	24.5535	16.809	-0.546695	0.0416725	yes
LOC100141258	25:2515681-2521344	MYCO	CTRL	51.6662	35.3703	-0.546682	0.0108337	yes
KCNT1	11:103398211-103438933	MYCO	CTRL	10.2153	7.02852	-0.539435	0.0212381	yes
PARVB	5:115517820-115574009	MYCO	CTRL	14.6648	10.1036	-0.537487	0.0496543	yes
STOM	8:112646068-112680924	MYCO	CTRL	57.8627	40.03	-0.531552	0.0108337	yes
RCN3	18:56422332-56430761	MYCO	CTRL	33.8338	23.545	-0.523047	0.0416725	yes
ACO1	8:11480113-11543046	MYCO	CTRL	21.1029	14.7043	-0.521206	0.0284731	yes
EMILIN1	11:72539295-72547260	MYCO	CTRL	15.6597	11.0212	-0.506768	0.0435471	yes
CORO1B	29:45974630-45980142	MYCO	CTRL	100.042	70.5935	-0.502996	0.0108337	yes
AOC3	19:43514250-43521180	MYCO	CTRL	20.4097	14.4039	-0.502795	0.0324219	yes
HSPG2	2:131508855-131596962	MYCO	CTRL	7.79042	5.50817	-0.500128	0.0367525	yes
PRDX4	X:126551743-126564689	MYCO	CTRL	97.4393	69.2141	-0.493437	0.0284731	yes
FNDC3B	1:95888013-96173201	MYCO	CTRL	11.723	8.32996	-0.492955	0.0261282	yes
CD209	7:17811221-17814125	MYCO	CTRL	93.4653	66.4512	-0.492135	0.0385573	yes
LOC512271	25:41273516-41296379	MYCO	CTRL	28.8851	20.5617	-0.490365	0.0435471	yes
LAMC1	16:65545496-65665386	MYCO	CTRL	11.4899	8.18459	-0.489382	0.0367525	yes
VWF	5:104603431-104727430	MYCO	CTRL	10.2298	7.29873	-0.487059	0.0453732	yes
ELL2	7:97621823-97693509	MYCO	CTRL	30.1061	21.537	-0.483241	0.0346183	yes
AKR1B1	4:99016784-99033590	MYCO	CTRL	59.9876	43.0864	-0.477434	0.0468544	yes
PKIB	9:28880102-29001337	MYCO	CTRL	61.3103	44.5457	-0.460845	0.0453732	yes
MVP	25:26661749-26681331	MYCO	CTRL	66.8352	49.2452	-0.440624	0.0385573	yes
CD8A	11:47988322-47995394	MYCO	CTRL	45.4191	62.1587	0.452658	0.0385573	yes
DST	23:3281537-3688415	MYCO	CTRL	4.07869	5.59635	0.456381	0.0496543	yes
LOC512486	3:54306890-54323003	MYCO	CTRL	59.23	81.5251	0.460917	0.0402884	yes
CXCL12	28:45410675-45418794	MYCO	CTRL	85.2087	118.91	0.480798	0.0284731	yes
CTSW	29:44661697-44665098	MYCO	CTRL	49.4883	69.1442	0.482521	0.0284731	yes
MFGE8	21:20889910-20904940	MYCO	CTRL	38.1635	53.3526	0.483364	0.0416725	yes
C9H6orf70	9:105128746-105157156	MYCO	CTRL	23.4104	32.798	0.486455	0.0496543	yes
FKBP5	23:9521253-9637802	MYCO	CTRL	52.2829	73.5299	0.491993	0.0416725	yes
FAM100B	19:56071913-56078582	MYCO	CTRL	70.6426	99.4937	0.494066	0.0189013	yes
HERC6	6:37736137-37793279	MYCO	CTRL	16.6597	23.4744	0.494722	0.0416725	yes
STAG3	25:36741125-36768836	MYCO	CTRL	16.169	22.7927	0.495347	0.0160935	yes
CD69	5:100740573-100747670	MYCO	CTRL	43.251	61.4846	0.50749	0.0160935	yes
IDO1	27:34686576-34699492	MYCO	CTRL	86.7379	123.864	0.514017	0.00809071	yes
CD7	19:51152179-51155593	MYCO	CTRL	31.4712	45.071	0.518168	0.0468544	yes
C22H3orf37	22:59818078-59832821	MYCO	CTRL	116.768	168.168	0.526257	0.0236896	yes
IRF7	29:50903718-50906821	MYCO	CTRL	51.434	74.095	0.526655	0.00809071	yes
IFI44	3:66277614-66297668	MYCO	CTRL	20.0779	29.0817	0.534504	0.0468544	yes
AOX1	2:89517708-89589232	MYCO	CTRL	18.3284	26.6134	0.538071	0.00448667	yes
TSC22D3	X:59707756-59774048	MYCO	CTRL	93.9106	136.427	0.538767	0.0261282	yes
C11H2orf40	11:45690015-45699417	MYCO	CTRL	50.9071	74.0141	0.539934	0.0324219	yes
RASAL1	17:63397102-63429859	MYCO	CTRL	15.1897	22.0871	0.540115	0.0133991	yes
ABTB1	22:60502718-60507367	MYCO	CTRL	131.247	192.486	0.552475	0.0133991	yes
IFI6	2:126246582-126250171	MYCO	CTRL	221.375	325.643	0.556798	0.0307294	yes
ZBP1	13:59097200-59109193	MYCO	CTRL	31.5546	46.7285	0.566454	0.0133991	yes
INPP4B	17:15685434-16116848	MYCO	CTRL	8.82517	13.0968	0.569516	0.0108337	yes
LOC100335205	4:83280275-83318437	MYCO	CTRL	11.0098	16.449	0.579211	0.00448667	yes
CHST1	15:76573742-76578093	MYCO	CTRL	9.5373	14.4027	0.59469	0.0236896	yes
LOC100298822	23:28425331-28450252	MYCO	CTRL	237.962	359.91	0.596905	0.0367525	yes
PTGR1	8:102666737-102697281	MYCO	CTRL	22.4095	34.0005	0.601444	0.0324219	yes
LOC781710	3:54541930-54609395	MYCO	CTRL	22.5384	34.209	0.601993	0.0108337	yes
GBP5	3:54253046-54269516	MYCO	CTRL	10.7302	16.2942	0.602686	0.0307294	yes
LOC511982	18:61379104-61400678	MYCO	CTRL	12.4995	19.0475	0.607734	0.0133991	yes
IFIT1	26:11104064-11110099	MYCO	CTRL	9.83767	15.0225	0.610738	0.0435471	yes
RAPGEF5	4:31017032-31212684	MYCO	CTRL	5.77367	8.91669	0.627019	0.0496543	yes
IL7R	20:38335568-38368240	MYCO	CTRL	30.6926	47.6221	0.633741	0.00448667	yes
ARMC12	23:9683949-9694015	MYCO	CTRL	13.7576	21.4121	0.638201	0.0261282	yes
TBX21	19:39351740-39363523	MYCO	CTRL	10.7627	16.8362	0.645526	0.00448667	yes
IFI47	7:41823773-41840054	MYCO	CTRL	37.7689	59.5484	0.656862	0.00448667	yes
MT2A	18:24125365-24126333	MYCO	CTRL	45.7812	72.3403	0.660043	0.0496543	yes
SYNM	21:7768428-7793372	MYCO	CTRL	1.88527	2.98012	0.660601	0.0453732	yes
RN5-8S1	25:32467531-32467688	MYCO	CTRL	22182.7	35117.9	0.662772	0.00448667	yes
SOCS1	25:9974847-9975970	MYCO	CTRL	25.8454	40.9468	0.663847	0.0108337	yes
UROS	26:45635843-45660024	MYCO	CTRL	12.3917	19.6468	0.664922	0.00809071	yes
CCL4	19:14653459-14655028	MYCO	CTRL	35.0601	55.613	0.665592	0.00809071	yes
DDIT4	28:28483402-28485434	MYCO	CTRL	58.0645	93.9641	0.694454	0.00448667	yes
LOC786987	23:28813918-28847628	MYCO	CTRL	9.41896	15.336	0.703281	0.0484308	yes
LOC507055	3:54891011-54957690	MYCO	CTRL	21.0836	34.3521	0.704277	0.00448667	yes
EGR3	8:70502498-70506409	MYCO	CTRL	8.65338	14.1098	0.705364	0.00448667	yes
LOC751788	5:102537289-102598584	MYCO	CTRL	2.56238	4.23152	0.723688	0.00448667	yes
KLRK1	5:100038295-100048947	MYCO	CTRL	15.2601	25.2689	0.727601	0.0324219	yes
ISG15	16:52714626-52715654	MYCO	CTRL	97.152	162.344	0.740737	0.00448667	yes
MEGF6	16:50705000-50804680	MYCO	CTRL	4.06721	6.81739	0.745178	0.00809071	yes
RSAD2	11:90012622-90029927	MYCO	CTRL	9.19632	15.4854	0.751781	0.00448667	yes
EOMES	22:2112409-2117440	MYCO	CTRL	5.7138	9.74676	0.770473	0.00448667	yes
AICDA	5:101686492-101690821	MYCO	CTRL	20.5431	35.1001	0.772823	0.0133991	yes
ASIP	13:64213311-64239964	MYCO	CTRL	50.9214	87.1407	0.775075	0.00448667	yes
GP2	25:18102956-18119385	MYCO	CTRL	25.7506	44.2009	0.779469	0.00448667	yes
SCML4	9:42836239-42857244	MYCO	CTRL	10.8741	18.9136	0.79853	0.0133991	yes
TRAT1	1:53995475-54043196	MYCO	CTRL	14.8861	26.1539	0.813062	0.00448667	yes
GZMA	20:24033745-24042721	MYCO	CTRL	3.95301	6.98873	0.822079	0.0212381	yes
CXCL10	6:92607225-92755610	MYCO	CTRL	109.356	195.588	0.838787	0.00448667	yes
GZMM	7:44797947-44803593	MYCO	CTRL	11.5953	20.8153	0.844106	0.00448667	yes
MGC126945	23:27600049-27604058	MYCO	CTRL	212.43	384.332	0.855367	0.00448667	yes
LOC616254	19:48884072-48900904	MYCO	CTRL	4.03407	7.32928	0.861435	0.0324219	yes
HMCN2	11:100603003-100777880	MYCO	CTRL	0.52523	0.955689	0.863593	0.0108337	yes
CD244	3:8794792-8831787	MYCO	CTRL	5.8266	10.7776	0.887306	0.00448667	yes
IFIT3	26:11083266-11090210	MYCO	CTRL	9.58659	17.9927	0.908325	0.00448667	yes
GZMH	21:35206044-35208985	MYCO	CTRL	13.1686	24.9096	0.9196	0.00448667	yes
CXCL9	6:92600176-92604818	MYCO	CTRL	247.116	467.903	0.92102	0.00448667	yes
LOC531557	5:74722047-74734330	MYCO	CTRL	5.50552	10.6154	0.947206	0.00809071	yes
GGT1	17:73437662-73453652	MYCO	CTRL	1.78183	3.43696	0.947772	0.0236896	yes
SCN4B	15:29257442-29277309	MYCO	CTRL	0.982795	1.90289	0.953229	0.0284731	yes
SAMD3	9:69266999-69311228	MYCO	CTRL	2.11579	4.11423	0.959424	0.00809071	yes
P2RX7	17:56217943-56275069	MYCO	CTRL	1.6104	3.14562	0.965927	0.0385573	yes
RNF213	19:52738337-52857752	MYCO	CTRL	0.241435	0.471789	0.966507	0.0108337	yes
RN28S1	3:53470477-53471334	MYCO	CTRL	624.943	1224.65	0.970574	0.00809071	yes
LOC100848861	21:29773433-29776318	MYCO	CTRL	4.57357	9.08471	0.990118	0.0189013	yes
LOC100848575	5:100182873-100188899	MYCO	CTRL	10.5714	21.2607	1.00802	0.00448667	yes
AP3B2	21:23429311-23466211	MYCO	CTRL	3.45549	6.97921	1.01418	0.00448667	yes
CLDN11	1:97788084-97802992	MYCO	CTRL	2.21759	4.48585	1.01638	0.0212381	yes
PLAC8	6:99655641-99690417	MYCO	CTRL	54.9769	112.488	1.03288	0.00448667	yes
GALNTL2	1:154923158-154969397	MYCO	CTRL	0.72447	1.51111	1.06061	0.0212381	yes
ULBP11	19:19935945-19947828	MYCO	CTRL	2.16847	4.54584	1.06787	0.0324219	yes
LOC508070	15:46851579-46859123	MYCO	CTRL	27.9039	59.3111	1.08783	0.00448667	yes
LOC515676	19:14514199-14548202	MYCO	CTRL	3.19104	6.92084	1.11692	0.00448667	yes
LOC100848726	29:50712831-50713218	MYCO	CTRL	391.26	875.12	1.16135	0.00448667	yes
LOC781675	3:54509583-54525819	MYCO	CTRL	0.759491	1.71989	1.17922	0.0468544	yes
CCL17	18:25501854-25504739	MYCO	CTRL	9.43591	21.6398	1.19745	0.00448667	yes
TDRD9	21:70123916-70233402	MYCO	CTRL	0.321217	0.740445	1.20484	0.0108337	yes
CCL24	25:34578757-34582072	MYCO	CTRL	2.04061	4.71877	1.20941	0.00809071	yes
KIR2DS1	18:62977105-62984310	MYCO	CTRL	1.58285	3.72061	1.23301	0.0133991	yes
LOC782954	22:47474743-47476948	MYCO	CTRL	7.32215	17.4063	1.24927	0.00448667	yes
CDH10	20:48874611-49060950	MYCO	CTRL	0.353482	0.862103	1.28622	0.0160935	yes
WIF1	5:48917721-49009466	MYCO	CTRL	1.19023	2.9091	1.28933	0.00448667	yes
CCL5	19:14823469-14831157	MYCO	CTRL	95.3775	233.979	1.29466	0.00448667	yes
C2CD4B	10:47955994-47957474	MYCO	CTRL	2.04765	5.02456	1.29503	0.00448667	yes
RGS11	25:291813-299280	MYCO	CTRL	0.489435	1.25876	1.36281	0.0496543	yes
MT1A	18:24106715-24108524	MYCO	CTRL	3.66792	9.43506	1.36307	0.0261282	yes
LOC616364	19:14702293-14703961	MYCO	CTRL	7.27733	18.999	1.38444	0.00448667	yes
GPR37	4:89805487-89823611	MYCO	CTRL	0.407779	1.0871	1.41463	0.0133991	yes
GOT1L1	27:32885369-32890975	MYCO	CTRL	1.15578	3.14921	1.44613	0.00448667	yes
LOC782922	13:44064652-44085030	MYCO	CTRL	1.70066	4.78236	1.49163	0.00448667	yes
LOC613562	29:50288807-50291100	MYCO	CTRL	0.526835	1.53265	1.54061	0.0416725	yes
SLC6A7	7:63547217-63567495	MYCO	CTRL	0.175115	0.533874	1.6082	0.0346183	yes
SLC11A1	2:107114928-107125854	MYCO	CTRL	1.79501	5.59985	1.6414	0.00448667	yes
BOLA-DQA1	23:25350796-25356970	MYCO	CTRL	79.869	257.2	1.68718	0.00448667	yes
FCRL6	3:9986768-10007505	MYCO	CTRL	0.996724	3.35313	1.75024	0.00448667	yes
ULBP17	9:88231932-88235142	MYCO	CTRL	0.936489	3.29923	1.81679	0.00809071	yes
JSP.1	23:28469732-28473374	MYCO	CTRL	341.075	1483.83	2.12117	0.00448667	yes
OAS1	17:63611773-63646117	MYCO	CTRL	6.20071	28.1165	2.18091	0.00448667	yes
LOC781298	19:6355522-6378542	MYCO	CTRL	2.21417	10.2541	2.21136	0.00448667	yes
PROC	2:5034438-5044966	MYCO	CTRL	0.317843	1.55973	2.29491	0.00448667	yes
LOC786867	9:88304872-88370075	MYCO	CTRL	0.868483	4.38141	2.33483	0.00448667	yes
ULBP3	17:39881233-39884975	MYCO	CTRL	3.57527	18.601	2.37926	0.00448667	yes
RIN1	29:45029459-45034780	MYCO	CTRL	0.537609	6.05696	3.49397	0.00448667	yes
LOC100296102	10:23312058-23312614	MYCO	CTRL	0	1.55328	-	0.00448667	yes
TFF3	1:144067289-144071071	MYCO	CTRL	1.5655	0	-	0.00448667	yes
SLPI	13:74337276-74339570	MYCO	CTRL	0.966448	0	-	0.00448667	yes
SCGB3A2	7:61103906-61106912	MYCO	CTRL	3.96254	0	-	0.00448667	yes
ROPN1	1:68954524-68989623	MYCO	CTRL	0.411062	0	-	0.00448667	yes
LOC100848277	15:6147378-6150396	MYCO	CTRL	2.30637	0	-	0.00448667	yes
LOC100847175	6:90705828-90709880	MYCO	CTRL	0.597769	0	-	0.00448667	yes
LOC100295702	25:2214969-2218541	MYCO	CTRL	0.653729	0	-	0.00448667	yes
BPIFB1	13:63282031-63305522	MYCO	CTRL	1.92274	0	-	0.00448667	yes
BPIFA1	13:63247710-63254775	MYCO	CTRL	4.29179	0	-	0.00448667	yes

## Sheet: KEGG_pathways
Category	Term	Count	%	PValue	Genes	List Total	Pop Hits	Pop Total	Fold Enrichment	Bonferroni	Benjamini	FDR
KEGG_PATHWAY	bta04512:ECM-receptor interaction	12	0.446595	9.38753e-08	VWF, COL4A2, SDC1, COL4A1, COL6A3, COL3A1, HSPG2, COL1A2, ITGA11, COL1A1, FN1, SDC3	93	75	4940	8.49892	9.10586e-06	9.10586e-06	0.000103597
KEGG_PATHWAY	bta04514:Cell adhesion molecules (CAMs)	12	0.446595	2.23515e-05	PVR, BOLA-DQA1, SDC1, CD8A, PECAM1, VCAN, JSP.1, CLDN11, JAM3, CDH5, PDCD1, SDC3	93	129	4940	4.94124	0.00216578	0.00108347	0.0246636
KEGG_PATHWAY	bta04510:Focal adhesion	10	0.372162	0.00638435	VWF, COL4A2, COL4A1, COL6A3, COL3A1, COL1A2, ITGA11, COL1A1, PARVB, FN1	93	182	4940	2.91859	0.462737	0.187053	6.82413
KEGG_PATHWAY	bta04610:Complement and coagulation cascades	6	0.223297	0.00994463	VWF, A2M, F13A1, CFH, PROS1, PROC	93	71	4940	4.48887	0.620711	0.21523	10.443
KEGG_PATHWAY	bta04623:Cytosolic DNA-sensing pathway	5	0.186081	0.012599	IRF7, CCL5, CCL4, CXCL10, ZBP1	93	49	4940	5.42023	0.707669	0.218057	13.0574
KEGG_PATHWAY	bta04670:Leukocyte transendothelial migration	7	0.260514	0.0174567	MMP9, PECAM1, CLDN11, MMP2, CXCL12, JAM3, CDH5	93	112	4940	3.31989	0.818818	0.247767	17.6628
KEGG_PATHWAY	bta05340:Primary immunodeficiency	4	0.148865	0.0209935	CD8A, AICDA, IL7R, ADA	93	32	4940	6.63978	0.872298	0.254729	20.8752
KEGG_PATHWAY	bta04612:Antigen processing and presentation	5	0.186081	0.0354388	BOLA-DQA1, LOC781339, CD8A, KIR2DS1, JSP.1	93	67	4940	3.96405	0.969801	0.354348	32.8464
KEGG_PATHWAY	bta04062:Chemokine signaling pathway	8	0.29773	0.0392059	CCL24, LOC616364, CXCL9, CCL5, CCL4, CXCL12, CXCL10, CCL17	93	171	4940	2.48507	0.979339	0.350179	35.6847
KEGG_PATHWAY	bta04672:Intestinal immune network for IgA production	4	0.148865	0.0562938	BOLA-DQA1, AICDA, PIGR, CXCL12	93	47	4940	4.5207	0.996376	0.429944	47.2396
KEGG_PATHWAY	bta00590:Arachidonic acid metabolism	4	0.148865	0.0820381	TBXAS1, GGT1, PLA2G2D1, PLA2G5	93	55	4940	3.86315	0.999752	0.52991	61.1182

## Sheet: functional_clusters
Annotation Cluster 1	Enrichment Score: 12.32169852863506
Category	Term	Count	%	PValue	Genes	List Total	Pop Hits	Pop Total	Fold Enrichment	Bonferroni	Benjamini	FDR
GOTERM_CC_FAT	GO:0005576~extracellular region	54	2.00968	5.55747e-18	A2M, MMP9, F13A1, PGLYRP1, LOC531557, POSTN, MMP3, MMP2, CXCL12, CXCL10, NOV, ISG15, CFH, PI16, PRSS35, MFGE8, PIGR, MMP14, MMP13, PROC, BGN, SERPINF1, LOC616364, COL1A2, VCAN, COL1A1, PROS1, FMOD, TF, LUM, COL3A1, PAMR1, ELN, CXCL9, DCN, CCL5, CCL4, CCL24, TFF3, PLA2R1, FN1, DPT, COL4A2, COL4A1, FBN1, CCDC80, HSPG2, SPARC, CCL17, VWF, FBLN1, EBD, CAPG, VLDLR	120	892	6966	3.51424	7.50259e-16	7.50259e-16	6.51542e-15
GOTERM_CC_FAT	GO:0005578~proteinaceous extracellular matrix	26	0.967622	1.2587e-17	FMOD, MMP9, LUM, ELN, COL3A1, POSTN, DCN, MMP3, MMP2, TFF3, FN1, DPT, COL4A2, COL4A1, FBN1, HSPG2, CCDC80, SPARC, MMP14, MMP13, VWF, FBLN1, BGN, COL1A2, VCAN, COL1A1	120	163	6966	9.25951	1.69924e-15	8.4962e-16	1.47566e-14
SP_PIR_KEYWORDS	extracellular matrix	20	0.744325	8.71481e-17	FMOD, COL4A2, COL4A1, LUM, MMP9, COL3A1, FBN1, ELN, SPARC, DCN, MMP13, MMP2, VWF, BGN, COL1A2, TFF3, VCAN, COL1A1, DPT, FN1	127	84	7349	13.7777	2.38698e-14	2.38698e-14	1.44329e-13
GOTERM_CC_FAT	GO:0031012~extracellular matrix	26	0.967622	1.09549e-16	FMOD, MMP9, LUM, ELN, COL3A1, POSTN, DCN, MMP3, MMP2, TFF3, FN1, DPT, COL4A2, COL4A1, FBN1, HSPG2, CCDC80, SPARC, MMP14, MMP13, VWF, FBLN1, BGN, COL1A2, VCAN, COL1A1	120	178	6966	8.47921	1.4988e-14	4.996e-15	1.33227e-13
SP_PIR_KEYWORDS	Secreted	42	1.56308	8.01621e-16	FMOD, TF, A2M, S100A8, MMP9, F13A1, LUM, S100A9, ELN, PAMR1, COL3A1, CXCL9, PRDX4, PGLYRP1, DCN, CCL5, MMP2, CCL4, CXCL10, ISG15, CFH, TFF3, PLA2R1, PRSS35, FN1, DPT, COL4A2, COL4A1, FBN1, MFGE8, SPARC, PIGR, MMP13, VWF, BGN, SERPINF1, EBD, CAPG, COL1A2, VCAN, COL1A1, PROS1	127	583	7349	4.16874	1.67089e-13	8.34888e-14	9.88098e-13
GOTERM_CC_FAT	GO:0044421~extracellular region part	35	1.30257	8.9215e-15	FMOD, A2M, MMP9, LUM, ELN, COL3A1, CXCL9, POSTN, DCN, CCL5, MMP3, CCL4, MMP2, CXCL10, CCL24, TFF3, FN1, DPT, COL4A2, COL4A1, FBN1, HSPG2, CCDC80, MFGE8, SPARC, MMP14, MMP13, VWF, FBLN1, BGN, SERPINF1, COL1A2, VCAN, COL1A1, VLDLR	120	427	6966	4.7582	1.19904e-12	2.9976e-13	1.04139e-11
UP_SEQ_FEATURE	disulfide bond	45	1.67473	2.30953e-14	FMOD, TF, A2M, CD8A, MMP9, LUM, COL3A1, ELN, PAMR1, CXCL9, PGLYRP1, PRDX4, DCN, CCL5, MMP2, CCL4, CXCL10, ST6GALNAC6, CFH, TFF3, TIE1, PLA2R1, PRSS35, FN1, DPT, COL4A2, COL4A1, FBN1, MFGE8, PIGR, SPARC, MMP14, MMP13, SIRPA, TRAT1, PROC, VWF, BGN, GPBAR1, EBD, PECAM1, SCN4B, VCAN, CTSC, PROS1	99	764	5635	3.35257	1.15694e-11	1.15694e-11	3.32623e-11
UP_SEQ_FEATURE	signal peptide	49	1.8236	1.90445e-13	CD8A, MMP9, PRDX4, PGLYRP1, MMP2, CXCL10, CFH, TIE1, PI16, PRSS35, MFGE8, PIGR, MMP14, MMP13, SIRPA, PROC, BOLA-DQA1, SDC1, BGN, SERPINF1, COL1A2, CTSC, VCAN, JSP.1, COL1A1, PROS1, FMOD, TF, LUM, PAMR1, ELN, CXCL9, DCN, CCL5, CCL4, CDH5, TFF3, PLA2R1, FN1, DPT, MUC1, FBN1, SPARC, VWF, EBD, PECAM1, SCN4B, RCN3, IFI6	99	960	5635	2.90525	9.5392e-11	4.7696e-11	2.74269e-10
SP_PIR_KEYWORDS	disulfide bond	45	1.67473	4.5315e-13	FMOD, TF, A2M, CD8A, MMP9, LUM, COL3A1, ELN, PAMR1, CXCL9, PGLYRP1, PRDX4, DCN, CCL5, MMP2, CCL4, CXCL10, ST6GALNAC6, CFH, TFF3, TIE1, PLA2R1, PRSS35, FN1, DPT, COL4A2, COL4A1, FBN1, MFGE8, PIGR, SPARC, MMP14, MMP13, SIRPA, TRAT1, PROC, VWF, BGN, GPBAR1, EBD, PECAM1, SCN4B, VCAN, CTSC, PROS1	127	802	7349	3.24685	9.74365e-11	3.24788e-11	5.74751e-10
SP_PIR_KEYWORDS	signal	49	1.8236	8.1596e-13	CD8A, MMP9, PRDX4, PGLYRP1, MMP2, CXCL10, CFH, TIE1, PI16, PRSS35, MFGE8, PIGR, MMP14, MMP13, SIRPA, PROC, BOLA-DQA1, SDC1, BGN, SERPINF1, COL1A2, CTSC, VCAN, JSP.1, COL1A1, PROS1, FMOD, TF, LUM, PAMR1, ELN, CXCL9, DCN, CCL5, CCL4, CDH5, TFF3, PLA2R1, FN1, DPT, MUC1, FBN1, SPARC, VWF, EBD, PECAM1, SCN4B, RCN3, IFI6	127	960	7349	2.95358	1.75443e-10	4.38607e-11	1.03489e-09
SP_PIR_KEYWORDS	glycoprotein	49	1.8236	2.11799e-11	A2M, TSPAN1, CD8A, MMP9, AQP1, MMP2, SLC1A4, ST6GALNAC6, CFH, TIE1, PI16, PRSS35, MFGE8, PIGR, MMP13, SIRPA, PROC, SDC1, BGN, GPBAR1, SERPINF1, DGAT2, COL1A2, CTSC, VCAN, COL1A1, PROS1, FMOD, TF, LUM, PAMR1, COL3A1, DCN, CDH5, SLC11A1, PLA2R1, NEFL, FN1, MUC1, LOC511937, COL4A1, FBN1, SLC6A15, SPARC, ANXA4, VWF, PECAM1, SCN4B, RCN3	127	1048	7349	2.70557	4.55369e-09	9.10738e-10	2.6861e-08
GOTERM_CC_FAT	GO:0044420~extracellular matrix part	12	0.446595	1.44054e-09	FBLN1, COL4A2, COL4A1, LUM, COL3A1, CCDC80, HSPG2, COL1A2, TFF3, COL1A1, SPARC, FN1	120	55	6966	12.6655	1.94473e-07	3.88947e-08	1.68885e-06
GOTERM_BP_FAT	GO:0030198~extracellular matrix organization	10	0.372162	1.87729e-07	FBLN1, MMP9, COL3A1, ELN, CCDC80, HSPG2, COL1A2, POSTN, COL1A1, DPT	137	57	8785	11.2498	0.000252276	0.000126146	0.000307774
UP_SEQ_FEATURE	glycosylation site:N-linked (GlcNAc...)	39	1.45143	2.04438e-07	FMOD, TF, A2M, TSPAN1, MMP9, PAMR1, DCN, AQP1, MMP2, CDH5, SLC1A4, SLC11A1, ST6GALNAC6, CFH, TIE1, PLA2R1, PI16, PRSS35, FN1, MUC1, FBN1, SLC6A15, SPARC, PIGR, SIRPA, MMP13, PROC, VWF, SDC1, BGN, DGAT2, SERPINF1, GPBAR1, PECAM1, SCN4B, VCAN, CTSC, RCN3, PROS1	99	961	5635	2.30994	0.000102418	3.41405e-05	0.000294481
GOTERM_BP_FAT	GO:0043062~extracellular structure organization	10	0.372162	1.64324e-06	FBLN1, MMP9, COL3A1, ELN, CCDC80, HSPG2, COL1A2, POSTN, COL1A1, DPT	137	73	8785	8.78412	0.00220608	0.000735902	0.002694
Annotation Cluster 2	Enrichment Score: 4.6963160306744225
Category	Term	Count	%	PValue	Genes	List Total	Pop Hits	Pop Total	Fold Enrichment	Bonferroni	Benjamini	FDR
SP_PIR_KEYWORDS	egf-like domain	12	0.446595	1.56174e-07	FBLN1, DLL4, PAMR1, FBN1, MFGE8, VCAN, WIF1, STAB2, TIE1, PROS1, VLDLR, PROC	127	84	7349	8.26659	3.35768e-05	5.59622e-06	0.000198064
INTERPRO	IPR000742:EGF-like, type 3	12	0.446595	1.87971e-07	FBLN1, DLL4, PAMR1, FBN1, MFGE8, VCAN, WIF1, STAB2, TIE1, PROS1, VLDLR, PROC	164	82	9171	8.18352	6.71035e-05	6.71035e-05	0.000257841
INTERPRO	IPR006209:EGF	10	0.372162	3.21873e-07	DLL4, PAMR1, FBN1, MFGE8, VCAN, WIF1, STAB2, PROS1, VLDLR, PROC	164	53	9171	10.5511	0.000114902	5.74527e-05	0.000441514
INTERPRO	IPR006210:EGF-like	12	0.446595	3.48243e-07	FBLN1, DLL4, PAMR1, FBN1, MFGE8, VCAN, WIF1, STAB2, TIE1, PROS1, VLDLR, PROC	164	87	9171	7.7132	0.000124315	4.144e-05	0.000477685
INTERPRO	IPR013032:EGF-like region, conserved site	13	0.483811	7.63891e-07	FBN1, PAMR1, MFGE8, STAB2, PROC, FBLN1, DLL4, WIF1, VCAN, TIE1, PROS1, FN1, VLDLR	164	114	9171	6.37693	0.000272672	6.8175e-05	0.00104783
SMART	SM00181:EGF	12	0.446595	4.65305e-06	FBLN1, DLL4, PAMR1, FBN1, MFGE8, VCAN, WIF1, STAB2, TIE1, PROS1, VLDLR, PROC	104	87	4364	5.7878	0.000404735	0.000404735	0.00502872
UP_SEQ_FEATURE	domain:EGF-like 1	6	0.223297	4.69612e-05	FBN1, MFGE8, VCAN, TIE1, PROS1, PROC	99	24	5635	14.2298	0.0232535	0.00586476	0.0676238
INTERPRO	IPR000152:EGF-type aspartate/asparagine hydroxylation conserved site	7	0.260514	6.69055e-05	FBLN1, DLL4, FBN1, VCAN, PROS1, VLDLR, PROC	164	40	9171	9.78613	0.0236031	0.00265049	0.0917356
INTERPRO	IPR018097:EGF-like calcium-binding, conserved site	6	0.223297	0.000402683	FBLN1, FBN1, VCAN, PROS1, VLDLR, PROC	164	36	9171	9.32012	0.133928	0.0119107	0.55095
INTERPRO	IPR001881:EGF-like calcium-binding	6	0.223297	0.000458986	FBLN1, DLL4, FBN1, VCAN, PROS1, VLDLR	164	37	9171	9.06823	0.151169	0.0125282	0.627759
INTERPRO	IPR013111:EGF, extracellular	5	0.186081	0.000774207	DLL4, FBN1, WIF1, STAB2, TIE1	164	24	9171	11.6502	0.241566	0.0182644	1.05677
SMART	SM00179:EGF_CA	6	0.223297	0.00158875	FBLN1, DLL4, FBN1, VCAN, PROS1, VLDLR	104	37	4364	6.80457	0.12919	0.0227914	1.70374
INTERPRO	IPR013091:EGF calcium-binding	4	0.148865	0.0106165	FBLN1, FBN1, PROS1, VLDLR	164	26	9171	8.60319	0.977859	0.136319	13.6192
Annotation Cluster 3	Enrichment Score: 4.3008609498662995
Category	Term	Count	%	PValue	Genes	List Total	Pop Hits	Pop Total	Fold Enrichment	Bonferroni	Benjamini	FDR
GOTERM_BP_FAT	GO:0009611~response to wounding	14	0.521027	2.86143e-06	F13A1, CXCL9, CCL5, CCL4, PROC, CXCL10, VWF, P2RX7, PECAM1, CFH, BMPR1B, PROS1, NEFL, FN1	137	175	8785	5.12993	0.00383838	0.000960978	0.00469109
GOTERM_BP_FAT	GO:0006952~defense response	14	0.521027	3.92719e-05	SNCA, PGLYRP1, CXCL9, RSAD2, IFI47, STAB2, CCL5, CCL4, CXCL10, P2RX7, EBD, CFH, BMPR1B, FN1	137	223	8785	4.02573	0.0514137	0.0065761	0.0643653
GOTERM_BP_FAT	GO:0006954~inflammatory response	8	0.29773	0.00111366	P2RX7, CXCL9, CFH, BMPR1B, CCL5, CCL4, CXCL10, FN1	137	104	8785	4.93262	0.776332	0.0950174	1.81023
Annotation Cluster 4	Enrichment Score: 3.484724702771244
Category	Term	Count	%	PValue	Genes	List Total	Pop Hits	Pop Total	Fold Enrichment	Bonferroni	Benjamini	FDR
GOTERM_CC_FAT	GO:0044420~extracellular matrix part	12	0.446595	1.44054e-09	FBLN1, COL4A2, COL4A1, LUM, COL3A1, CCDC80, HSPG2, COL1A2, TFF3, COL1A1, SPARC, FN1	120	55	6966	12.6655	1.94473e-07	3.88947e-08	1.68885e-06
KEGG_PATHWAY	bta04512:ECM-receptor interaction	12	0.446595	9.38753e-08	VWF, COL4A2, SDC1, COL4A1, COL6A3, COL3A1, HSPG2, COL1A2, ITGA11, COL1A1, FN1, SDC3	93	75	4940	8.49892	9.10586e-06	9.10586e-06	0.000103597
GOTERM_MF_FAT	GO:0005201~extracellular matrix structural constituent	7	0.260514	4.46618e-07	COL4A2, COL4A1, FBN1, COL3A1, ELN, COL1A2, COL1A1	139	21	9249	22.1799	0.000151392	0.000151392	0.000607928
SP_PIR_KEYWORDS	hydroxylation	8	0.29773	8.68564e-07	COL4A2, COL4A1, COL3A1, ELN, COL1A2, COL1A1, PROS1, PROC	127	32	7349	14.4665	0.000186724	2.6677e-05	0.00110153
GOTERM_CC_FAT	GO:0005581~collagen	6	0.223297	9.5919e-06	COL4A2, COL4A1, LUM, COL3A1, COL1A2, COL1A1	120	18	6966	19.35	0.00129407	0.000215795	0.0112447
SP_PIR_KEYWORDS	collagen	8	0.29773	9.73245e-06	CTHRC1, COL4A2, COL4A1, C1QTNF3, COL3A1, COL1A2, COL1A1, COL8A1	127	45	7349	10.2873	0.0020903	0.000232471	0.0123423
INTERPRO	IPR008160:Collagen triple helix repeat	8	0.29773	1.4716e-05	CTHRC1, COL4A1, C1QTNF3, COL21A1, COL3A1, COL1A2, COL1A1, COL8A1	164	46	9171	9.72534	0.00523988	0.000875226	0.0201841
GOTERM_CC_FAT	GO:0005583~fibrillar collagen	4	0.148865	9.36509e-05	LUM, COL3A1, COL1A2, COL1A1	120	6	6966	38.7	0.0125639	0.00114875	0.109738
SP_PIR_KEYWORDS	triple helix	4	0.148865	0.000163808	COL4A1, COL3A1, COL1A2, COL1A1	127	7	7349	33.0664	0.0346085	0.00270568	0.207547
SP_PIR_KEYWORDS	trimer	4	0.148865	0.000163808	COL4A1, COL3A1, COL1A2, COL1A1	127	7	7349	33.0664	0.0346085	0.00270568	0.207547
SP_PIR_KEYWORDS	Pyrrolidone carboxylic acid	7	0.260514	0.000267628	FMOD, LUM, COL1A2, PGLYRP1, COL1A1, DPT, FN1	127	53	7349	7.6427	0.0559232	0.00410211	0.338883
GOTERM_BP_FAT	GO:0030199~collagen fibril organization	4	0.148865	0.00116578	COL3A1, COL1A2, COL1A1, DPT	137	14	8785	18.3212	0.79148	0.0933353	1.8942
PIR_SUPERFAMILY	PIRSF002255:collagen alpha 1(I) chain	3	0.111649	0.00250093	COL3A1, COL1A2, COL1A1	82	4	3890	35.5793	0.189692	0.189692	2.65202
INTERPRO	IPR000885:Fibrillar collagen, C-terminal	3	0.111649	0.00449361	COL3A1, COL1A2, COL1A1	164	6	9171	27.9604	0.799679	0.0675184	5.99084
KEGG_PATHWAY	bta04510:Focal adhesion	10	0.372162	0.00638435	VWF, COL4A2, COL4A1, COL6A3, COL3A1, COL1A2, ITGA11, COL1A1, PARVB, FN1	93	182	4940	2.91859	0.462737	0.187053	6.82413
SMART	SM00038:COLFI	3	0.111649	0.0077787	COL3A1, COL1A2, COL1A1	104	6	4364	20.9808	0.493075	0.081418	8.09343
GOTERM_BP_FAT	GO:0001568~blood vessel development	7	0.260514	0.00987169	DLL4, COL3A1, COL1A2, COL1A1, MMP2, CXCL12, CDH5	137	118	8785	3.80397	0.999998	0.332386	15.0108
GOTERM_BP_FAT	GO:0001944~vasculature development	7	0.260514	0.0110915	DLL4, COL3A1, COL1A2, COL1A1, MMP2, CXCL12, CDH5	137	121	8785	3.70966	1	0.34058	16.7112
GOTERM_BP_FAT	GO:0043588~skin development	3	0.111649	0.0191671	COL3A1, COL1A2, COL1A1	137	14	8785	13.7409	1	0.431896	27.1879
GOTERM_BP_FAT	GO:0008544~epidermis development	4	0.148865	0.0398778	LOC511937, COL3A1, COL1A2, COL1A1	137	49	8785	5.23462	1	0.623439	48.6844
GOTERM_BP_FAT	GO:0007398~ectoderm development	4	0.148865	0.0462774	LOC511937, COL3A1, COL1A2, COL1A1	137	52	8785	4.93262	1	0.647944	54.0132
GOTERM_MF_FAT	GO:0005198~structural molecule activity	11	0.409378	0.0593202	LOC511937, COL4A2, COL4A1, COL21A1, FBN1, COL3A1, ELN, COL1A2, COL1A1, CLDN11, NEFL	139	382	9249	1.91606	1	0.645318	56.4995
SP_PIR_KEYWORDS	coiled coil	5	0.186081	0.980189	COL4A1, COL3A1, COL1A2, COL1A1, NEFL	127	515	7349	0.561807	1	0.999998	100
Annotation Cluster 5	Enrichment Score: 3.2319836745430717
Category	Term	Count	%	PValue	Genes	List Total	Pop Hits	Pop Total	Fold Enrichment	Bonferroni	Benjamini	FDR
GOTERM_BP_FAT	GO:0007155~cell adhesion	15	0.558243	0.000265204	COL21A1, COL3A1, ITGA11, MFGE8, POSTN, CLDN11, STAB2, CDH5, VWF, PCDH1, PECAM1, VCAN, BMPR1B, DPT, FN1	137	306	8785	3.14334	0.299864	0.0350202	0.433905
GOTERM_BP_FAT	GO:0022610~biological adhesion	15	0.558243	0.000265204	COL21A1, COL3A1, ITGA11, MFGE8, POSTN, CLDN11, STAB2, CDH5, VWF, PCDH1, PECAM1, VCAN, BMPR1B, DPT, FN1	137	306	8785	3.14334	0.299864	0.0350202	0.433905
SP_PIR_KEYWORDS	cell adhesion	8	0.29773	0.00286345	VWF, PCDH1, PECAM1, MFGE8, ADA, CDH5, DPT, FN1	127	111	7349	4.17053	0.460183	0.0319278	3.57138
Annotation Cluster 6	Enrichment Score: 2.908381310830698
Category	Term	Count	%	PValue	Genes	List Total	Pop Hits	Pop Total	Fold Enrichment	Bonferroni	Benjamini	FDR
GOTERM_BP_FAT	GO:0032963~collagen metabolic process	5	0.186081	1.66701e-05	P2RX7, MMP9, COL1A1, MMP2, MMP13	137	11	8785	29.1473	0.0221556	0.00372716	0.0273264
GOTERM_BP_FAT	GO:0044259~multicellular organismal macromolecule metabolic process	5	0.186081	2.47053e-05	P2RX7, MMP9, COL1A1, MMP2, MMP13	137	12	8785	26.7184	0.0326591	0.00473224	0.0404956
GOTERM_BP_FAT	GO:0044236~multicellular organismal metabolic process	5	0.186081	8.6561e-05	P2RX7, MMP9, COL1A1, MMP2, MMP13	137	16	8785	20.0388	0.10983	0.0128438	0.141819
GOTERM_BP_FAT	GO:0001501~skeletal system development	9	0.334946	0.000526237	VDR, P2RX7, MMP9, HSPG2, COL1A2, COL1A1, BMPR1B, MMP2, MMP13	137	120	8785	4.80931	0.5071	0.0572499	0.859259
GOTERM_BP_FAT	GO:0048705~skeletal system morphogenesis	5	0.186081	0.00729678	P2RX7, HSPG2, COL1A1, BMPR1B, MMP2	137	50	8785	6.41241	0.999947	0.31516	11.3138
GOTERM_BP_FAT	GO:0051216~cartilage development	4	0.148865	0.0153008	HSPG2, COL1A1, BMPR1B, MMP13	137	34	8785	7.54401	1	0.396763	22.3369
GOTERM_BP_FAT	GO:0060348~bone development	4	0.148865	0.0508085	HSPG2, COL1A1, MMP2, MMP13	137	54	8785	4.74993	1	0.654187	57.4671
GOTERM_BP_FAT	GO:0001503~ossification	4	0.148865	0.0508085	HSPG2, COL1A1, MMP2, MMP13	137	54	8785	4.74993	1	0.654187	57.4671
Annotation Cluster 7	Enrichment Score: 2.862228138880685
Category	Term	Count	%	PValue	Genes	List Total	Pop Hits	Pop Total	Fold Enrichment	Bonferroni	Benjamini	FDR
INTERPRO	IPR013783:Immunoglobulin-like fold	16	0.59546	1.45053e-05	CD8A, F13A1, KIR2DS1, PIGR, MGC126945, SIRPA, PDCD1, BOLA-DQA1, PECAM1, SCN4B, TGM3, VCAN, JSP.1, TIE1, JAM3, CD7	164	231	9171	3.8733	0.00516503	0.00103515	0.0198951
INTERPRO	IPR013106:Immunoglobulin V-set	9	0.334946	0.000137217	CD8A, PECAM1, SCN4B, VCAN, PIGR, SIRPA, JAM3, PDCD1, CD7	164	86	9171	5.85217	0.0478091	0.00444371	0.188057
INTERPRO	IPR007110:Immunoglobulin-like	12	0.446595	0.000970438	BOLA-DQA1, CD8A, PECAM1, SCN4B, VCAN, JSP.1, PIGR, SIRPA, JAM3, MGC126945, PDCD1, CD7	164	203	9171	3.30566	0.292922	0.0214304	1.32297
INTERPRO	IPR003599:Immunoglobulin subtype	9	0.334946	0.00130594	PECAM1, SCN4B, KIR2DS1, VCAN, TIE1, PIGR, SIRPA, JAM3, CD7	164	120	9171	4.19405	0.372823	0.0270696	1.77657
SP_PIR_KEYWORDS	Immunoglobulin domain	7	0.260514	0.00410505	CD8A, PECAM1, SCN4B, VCAN, TIE1, PIGR, SIRPA	127	89	7349	4.55127	0.587039	0.0432567	5.08312
SMART	SM00409:IG	9	0.334946	0.00694924	PECAM1, SCN4B, KIR2DS1, VCAN, TIE1, PIGR, SIRPA, JAM3, CD7	104	120	4364	3.14712	0.45485	0.0830209	7.25967
INTERPRO	IPR013151:Immunoglobulin	4	0.148865	0.128033	PECAM1, KIR2DS1, TIE1, JAM3	164	70	9171	3.19547	1	0.723935	84.7302
Annotation Cluster 8	Enrichment Score: 2.603718069529579
Category	Term	Count	%	PValue	Genes	List Total	Pop Hits	Pop Total	Fold Enrichment	Bonferroni	Benjamini	FDR
GOTERM_BP_FAT	GO:0032963~collagen metabolic process	5	0.186081	1.66701e-05	P2RX7, MMP9, COL1A1, MMP2, MMP13	137	11	8785	29.1473	0.0221556	0.00372716	0.0273264
GOTERM_BP_FAT	GO:0044259~multicellular organismal macromolecule metabolic process	5	0.186081	2.47053e-05	P2RX7, MMP9, COL1A1, MMP2, MMP13	137	12	8785	26.7184	0.0326591	0.00473224	0.0404956
INTERPRO	IPR002477:Peptidoglycan binding-like	5	0.186081	2.87982e-05	MMP9, MMP14, MMP3, MMP2, MMP13	164	11	9171	25.4185	0.0102284	0.00146765	0.0394954
INTERPRO	IPR006026:Peptidase, metallopeptidases	5	0.186081	2.87982e-05	MMP9, MMP14, MMP3, MMP2, MMP13	164	11	9171	25.4185	0.0102284	0.00146765	0.0394954
INTERPRO	IPR001818:Peptidase M10A and M12B, matrixin and adamalysin	5	0.186081	6.06829e-05	MMP9, MMP14, MMP3, MMP2, MMP13	164	13	9171	21.508	0.0214315	0.00270439	0.0832069
INTERPRO	IPR000585:Hemopexin/matrixin	5	0.186081	6.06829e-05	MMP9, MMP14, MMP3, MMP2, MMP13	164	13	9171	21.508	0.0214315	0.00270439	0.0832069
INTERPRO	IPR018487:Hemopexin/matrixin, repeat	5	0.186081	6.06829e-05	MMP9, MMP14, MMP3, MMP2, MMP13	164	13	9171	21.508	0.0214315	0.00270439	0.0832069
SMART	SM00235:ZnMc	5	0.186081	8.50549e-05	MMP9, MMP14, MMP3, MMP2, MMP13	104	11	4364	19.0734	0.00737277	0.00369321	0.0918855
GOTERM_BP_FAT	GO:0044236~multicellular organismal metabolic process	5	0.186081	8.6561e-05	P2RX7, MMP9, COL1A1, MMP2, MMP13	137	16	8785	20.0388	0.10983	0.0128438	0.141819
UP_SEQ_FEATURE	domain:Hemopexin-like 3	4	0.148865	0.000169744	MMP9, MMP14, MMP2, MMP13	99	7	5635	32.5253	0.0815325	0.0168659	0.244228
UP_SEQ_FEATURE	domain:Hemopexin-like 4	4	0.148865	0.000169744	MMP9, MMP14, MMP2, MMP13	99	7	5635	32.5253	0.0815325	0.0168659	0.244228
UP_SEQ_FEATURE	domain:Hemopexin-like 1	4	0.148865	0.000169744	MMP9, MMP14, MMP2, MMP13	99	7	5635	32.5253	0.0815325	0.0168659	0.244228
UP_SEQ_FEATURE	domain:Hemopexin-like 2	4	0.148865	0.000169744	MMP9, MMP14, MMP2, MMP13	99	7	5635	32.5253	0.0815325	0.0168659	0.244228
SMART	SM00120:HX	5	0.186081	0.00017768	MMP9, MMP14, MMP3, MMP2, MMP13	104	13	4364	16.1391	0.0153407	0.00513994	0.191863
UP_SEQ_FEATURE	short sequence motif:Cysteine switch	4	0.148865	0.000268164	MMP9, MMP14, MMP2, MMP13	99	8	5635	28.4596	0.125732	0.0221458	0.385582
GOTERM_BP_FAT	GO:0044243~multicellular organismal catabolic process	4	0.148865	0.00028475	P2RX7, MMP9, MMP2, MMP13	137	9	8785	28.4996	0.318022	0.0341978	0.465815
SP_PIR_KEYWORDS	zymogen	8	0.29773	0.000447581	F13A1, MMP9, CTSC, MMP14, MMP2, MMP13, PROS1, PROC	127	81	7349	5.71517	0.0917645	0.00639623	0.566154
INTERPRO	IPR018486:Hemopexin/matrixin, conserved site	4	0.148865	0.000603455	MMP9, MMP14, MMP2, MMP13	164	10	9171	22.3683	0.19386	0.0152749	0.824593
UP_SEQ_FEATURE	metal ion-binding site:Zinc 2; in inhibited form	3	0.111649	0.00175598	MMP9, MMP2, MMP13	99	4	5635	42.6894	0.585433	0.104224	2.49984
UP_SEQ_FEATURE	propeptide:Activation peptide	5	0.186081	0.00188778	F13A1, MMP9, MMP14, MMP2, MMP13	99	31	5635	9.18051	0.611969	0.0998425	2.6851
SP_PIR_KEYWORDS	collagen degradation	3	0.111649	0.00281942	MMP9, MMP2, MMP13	127	5	7349	34.7197	0.455034	0.0331617	3.51737
UP_SEQ_FEATURE	metal ion-binding site:Zinc 2; catalytic	3	0.111649	0.00289347	MMP9, MMP2, MMP13	99	5	5635	34.1515	0.765835	0.123637	4.08802
GOTERM_BP_FAT	GO:0030574~collagen catabolic process	3	0.111649	0.00342612	MMP9, MMP2, MMP13	137	6	8785	32.062	0.990074	0.197199	5.47127
GOTERM_MF_FAT	GO:0004175~endopeptidase activity	12	0.446595	0.00689719	GZMM, HTRA1, MMP9, PAMR1, CTSC, MMP14, MMP3, PRSS35, MMP2, MMP13, CTSL1, PROC	139	312	9249	2.55921	0.904272	0.229484	8.99073
INTERPRO	IPR006025:Peptidase M, neutral zinc metallopeptidases, zinc-binding site	4	0.148865	0.0075178	MMP9, MMP14, MMP2, MMP13	164	23	9171	9.72534	0.93239	0.106179	9.83344
SP_PIR_KEYWORDS	metalloprotease	5	0.186081	0.00771107	MMP9, MMP14, MMP3, MMP2, MMP13	127	46	7349	6.2898	0.810678	0.0698051	9.3508
UP_SEQ_FEATURE	metal ion-binding site:Calcium 3; via carbonyl oxygen	3	0.111649	0.0123022	MMP9, MMP2, MMP13	99	10	5635	17.0758	0.997974	0.29145	16.3313
GOTERM_MF_FAT	GO:0070011~peptidase activity, acting on L-amino acid peptides	13	0.483811	0.0193676	MMP9, PAMR1, MMP3, MMP14, MMP13, MMP2, CTSL1, CTSW, PROC, GZMM, HTRA1, CTSC, PRSS35	139	410	9249	2.10979	0.99868	0.424493	23.3726
GOTERM_MF_FAT	GO:0008233~peptidase activity	13	0.483811	0.0244291	MMP9, PAMR1, MMP3, MMP14, MMP13, MMP2, CTSL1, CTSW, PROC, GZMM, HTRA1, CTSC, PRSS35	139	424	9249	2.04013	0.999772	0.428192	28.5844
GOTERM_MF_FAT	GO:0004222~metalloendopeptidase activity	5	0.186081	0.0366137	MMP9, MMP14, MMP3, MMP2, MMP13	139	84	9249	3.96069	0.999997	0.504653	39.8141
UP_SEQ_FEATURE	metal ion-binding site:Calcium 2; via carbonyl oxygen	3	0.111649	0.0422493	MMP9, MMP2, MMP13	99	19	5635	8.98724	1	0.578983	46.3027
UP_SEQ_FEATURE	metal ion-binding site:Calcium 1	3	0.111649	0.0422493	MMP9, MMP2, MMP13	99	19	5635	8.98724	1	0.578983	46.3027
UP_SEQ_FEATURE	metal ion-binding site:Calcium 2	3	0.111649	0.0597844	MMP9, MMP2, MMP13	99	23	5635	7.42424	1	0.655269	58.8513
SP_PIR_KEYWORDS	Protease	8	0.29773	0.0743969	MMP9, CTSC, MMP14, MMP3, MMP2, MMP13, CTSL1, PROC	127	214	7349	2.16322	1	0.405138	62.4863
GOTERM_MF_FAT	GO:0008237~metallopeptidase activity	5	0.186081	0.142761	MMP9, MMP14, MMP3, MMP2, MMP13	139	135	9249	2.46443	1	0.83481	87.7145
SP_PIR_KEYWORDS	hydrolase	12	0.446595	0.644274	MMP9, CTSC, AICDA, PLA2G2D1, MMP14, MMP3, MMP2, MMP13, ADA, CTSL1, PROC, MEST	127	689	7349	1.00783	1	0.983678	99.9998
SP_PIR_KEYWORDS	metal-binding	15	0.558243	0.840658	TF, TBXAS1, ACO1, MMP9, RSAD2, MMP3, MMP14, MMP13, MMP2, VDR, MT1A, STAC, AOX1, NGFRAP1, AICDA	127	1010	7349	0.859398	1	0.99902	100
GOTERM_MF_FAT	GO:0046914~transition metal ion binding	21	0.781541	0.90504	TF, PTGR1, TBXAS1, ACO1, MMP9, RSAD2, IDO1, SPARC, FOXP3, MMP3, MMP14, MMP13, MMP2, ADA, SLC11A1, VDR, STAC, PLOD2, AOX1, AICDA, LOXL2	139	1698	9249	0.822928	1	0.999997	100
SP_PIR_KEYWORDS	zinc	8	0.29773	0.948953	VDR, STAC, MMP9, AICDA, MMP14, MMP3, MMP2, MMP13	127	670	7349	0.690939	1	0.999972	100
GOTERM_MF_FAT	GO:0008270~zinc ion binding	11	0.409378	0.99787	VDR, PTGR1, STAC, MMP9, AICDA, FOXP3, MMP14, MMP3, MMP2, MMP13, ADA	139	1367	9249	0.535432	1	1	100
Annotation Cluster 9	Enrichment Score: 2.5105521867943947
Category	Term	Count	%	PValue	Genes	List Total	Pop Hits	Pop Total	Fold Enrichment	Bonferroni	Benjamini	FDR
GOTERM_MF_FAT	GO:0005539~glycosaminoglycan binding	8	0.29773	1.78152e-05	BGN, CCDC80, PGLYRP1, VCAN, POSTN, STAB2, DCN, FN1	139	56	9249	9.50565	0.00602122	0.00150871	0.0242471
GOTERM_MF_FAT	GO:0030247~polysaccharide binding	8	0.29773	6.41742e-05	BGN, CCDC80, PGLYRP1, VCAN, POSTN, STAB2, DCN, FN1	139	68	9249	7.82818	0.0215208	0.0043417	0.0873175
GOTERM_MF_FAT	GO:0001871~pattern binding	8	0.29773	6.41742e-05	BGN, CCDC80, PGLYRP1, VCAN, POSTN, STAB2, DCN, FN1	139	68	9249	7.82818	0.0215208	0.0043417	0.0873175
GOTERM_BP_FAT	GO:0030203~glycosaminoglycan metabolic process	3	0.111649	0.0342526	BGN, PGLYRP1, DCN	137	19	8785	10.1249	1	0.573303	43.5266
GOTERM_BP_FAT	GO:0006022~aminoglycan metabolic process	3	0.111649	0.0525929	BGN, PGLYRP1, DCN	137	24	8785	8.01551	1	0.656242	58.7592
GOTERM_MF_FAT	GO:0008201~heparin binding	3	0.111649	0.105002	CCDC80, POSTN, FN1	139	37	9249	5.3951	1	0.791316	77.9092
GOTERM_BP_FAT	GO:0005976~polysaccharide metabolic process	3	0.111649	0.192223	BGN, PGLYRP1, DCN	137	52	8785	3.69947	1	0.933238	96.9795
Annotation Cluster 10	Enrichment Score: 2.3798427060182887
Category	Term	Count	%	PValue	Genes	List Total	Pop Hits	Pop Total	Fold Enrichment	Bonferroni	Benjamini	FDR
GOTERM_MF_FAT	GO:0008009~chemokine activity	8	0.29773	5.43177e-07	CCL24, LOC616364, CXCL9, CCL5, CCL4, CXCL12, CXCL10, CCL17	139	34	9249	15.6564	0.00018412	9.20642e-05	0.000739361
GOTERM_MF_FAT	GO:0042379~chemokine receptor binding	8	0.29773	5.43177e-07	CCL24, LOC616364, CXCL9, CCL5, CCL4, CXCL12, CXCL10, CCL17	139	34	9249	15.6564	0.00018412	9.20642e-05	0.000739361
INTERPRO	IPR001811:Small chemokine, interleukin-8-like	6	0.223297	0.000117736	CCL24, CXCL9, CCL5, CCL4, CXCL12, CXCL10	164	28	9171	11.983	0.0411629	0.00419459	0.161378
SMART	SM00199:SCY	6	0.223297	0.000423922	CCL24, CXCL9, CCL5, CCL4, CXCL12, CXCL10	104	28	4364	8.99176	0.0362169	0.00917986	0.457206
GOTERM_MF_FAT	GO:0005125~cytokine activity	8	0.29773	0.00046034	CCL24, LOC616364, CXCL9, CCL5, CCL4, CXCL12, CXCL10, CCL17	139	93	9249	5.72383	0.144519	0.022052	0.624793
SP_PIR_KEYWORDS	chemotaxis	5	0.186081	0.000788322	S100A8, S100A9, CCL5, CCL4, CXCL10	127	25	7349	11.5732	0.155961	0.0105413	0.995182
GOTERM_BP_FAT	GO:0006954~inflammatory response	8	0.29773	0.00111366	P2RX7, CXCL9, CFH, BMPR1B, CCL5, CCL4, CXCL10, FN1	137	104	8785	4.93262	0.776332	0.0950174	1.81023
GOTERM_CC_FAT	GO:0005615~extracellular space	12	0.446595	0.00574185	CCL24, A2M, SERPINF1, MMP9, CXCL9, COL1A2, MFGE8, CCL5, CCL4, MMP2, VLDLR, CXCL10	120	267	6966	2.60899	0.540393	0.0474251	6.52814
KEGG_PATHWAY	bta04623:Cytosolic DNA-sensing pathway	5	0.186081	0.012599	IRF7, CCL5, CCL4, CXCL10, ZBP1	93	49	4940	5.42023	0.707669	0.218057	13.0574
SP_PIR_KEYWORDS	inflammatory response	4	0.148865	0.0232819	CXCL9, CCL5, CCL4, CXCL10	127	36	7349	6.42957	0.993685	0.177001	25.8262
PIR_SUPERFAMILY	PIRSF001950:small inducible chemokine, C/CC types	3	0.111649	0.0287895	CCL24, CCL5, CCL4	82	13	3890	10.9475	0.914035	0.706801	26.9158
SP_PIR_KEYWORDS	cytokine	5	0.186081	0.0377813	CCL24, CXCL9, CCL5, CCL4, CXCL10	127	74	7349	3.90987	0.999747	0.248385	38.6417
KEGG_PATHWAY	bta04062:Chemokine signaling pathway	8	0.29773	0.0392059	CCL24, LOC616364, CXCL9, CCL5, CCL4, CXCL12, CXCL10, CCL17	93	171	4940	2.48507	0.979339	0.350179	35.6847
GOTERM_BP_FAT	GO:0042330~taxis	4	0.148865	0.0485168	CCL24, CCL5, CCL4, CXCL10	137	53	8785	4.83955	1	0.653882	55.7519
GOTERM_BP_FAT	GO:0006935~chemotaxis	4	0.148865	0.0485168	CCL24, CCL5, CCL4, CXCL10	137	53	8785	4.83955	1	0.653882	55.7519
GOTERM_BP_FAT	GO:0007626~locomotory behavior	5	0.186081	0.0692335	CCL24, SNCA, CCL5, CCL4, CXCL10	137	100	8785	3.2062	1	0.709529	69.157
KEGG_PATHWAY	bta04060:Cytokine-cytokine receptor interaction	7	0.260514	0.131859	LOC616364, CXCL9, IL7R, CCL5, CCL4, CXCL12, CXCL10	93	186	4940	1.99908	0.999999	0.681136	78.9959
KEGG_PATHWAY	bta04620:Toll-like receptor signaling pathway	4	0.148865	0.254853	IRF7, CXCL9, CCL5, CXCL10	93	94	4940	2.26035	1	0.850779	96.1086
GOTERM_BP_FAT	GO:0007610~behavior	5	0.186081	0.259184	CCL24, SNCA, CCL5, CCL4, CXCL10	137	167	8785	1.91988	1	0.963299	99.2689
Annotation Cluster 11	Enrichment Score: 2.1984601199645777
Category	Term	Count	%	PValue	Genes	List Total	Pop Hits	Pop Total	Fold Enrichment	Bonferroni	Benjamini	FDR
INTERPRO	IPR000562:Type II fibronectin, collagen-binding	4	0.148865	0.000603455	MMP9, PLA2R1, MMP2, FN1	164	10	9171	22.3683	0.19386	0.0152749	0.824593
SMART	SM00059:FN2	4	0.148865	0.00135833	MMP9, PLA2R1, MMP2, FN1	104	10	4364	16.7846	0.111531	0.0233735	1.45829
UP_SEQ_FEATURE	domain:Fibronectin type-II 1	3	0.111649	0.00429109	MMP9, MMP2, FN1	99	6	5635	28.4596	0.884034	0.142634	6.00643
UP_SEQ_FEATURE	domain:Fibronectin type-II 2	3	0.111649	0.00429109	MMP9, MMP2, FN1	99	6	5635	28.4596	0.884034	0.142634	6.00643
KEGG_PATHWAY	bta05200:Pathways in cancer	6	0.223297	0.674395	COL4A2, LOC781339, COL4A1, MMP9, MMP2, FN1	93	303	4940	1.05185	1	0.992898	99.9996
Annotation Cluster 12	Enrichment Score: 2.112733661625129
Category	Term	Count	%	PValue	Genes	List Total	Pop Hits	Pop Total	Fold Enrichment	Bonferroni	Benjamini	FDR
SP_PIR_KEYWORDS	calcium	19	0.707108	4.42295e-06	LOC511937, S100A8, F13A1, MMP9, S100A9, FBN1, SPARC, MMP14, ANXA4, MMP13, MMP2, CDH5, PROC, FBLN1, PCDH1, VCAN, RCN3, PROS1, S100A2	127	308	7349	3.56966	0.000950484	0.00011886	0.00560917
GOTERM_MF_FAT	GO:0005509~calcium ion binding	23	0.855973	1.02346e-05	LOC511937, S100A8, F13A1, MMP9, S100A9, FBN1, SPARC, MMP14, ANXA4, MMP13, MMP2, CDH5, PROC, FBLN1, PCDH1, DLL4, VCAN, PLA2G2D1, RCN3, DST, PROS1, VLDLR, S100A2	139	528	9249	2.8985	0.00346353	0.00115585	0.0139303
GOTERM_MF_FAT	GO:0043167~ion binding	43	1.6003	0.159894	TF, S100A8, MMP9, F13A1, S100A9, RSAD2, MMP3, MMP2, ADA, CDH5, SLC11A1, VDR, PCDH1, STAC, MT1A, PLOD2, NGFRAP1, PLA2G2D1, LOXL2, S100A2, LOC511937, PTGR1, TBXAS1, ACO1, FBN1, SPARC, IDO1, MMP14, FOXP3, ANXA4, MMP13, PROC, FBLN1, DLL4, AOX1, SCN4B, VCAN, AICDA, CTSC, RCN3, DST, PROS1, VLDLR	139	2439	9249	1.1731	1	0.842089	90.6665
GOTERM_MF_FAT	GO:0046872~metal ion binding	42	1.56308	0.168788	TF, S100A8, MMP9, F13A1, S100A9, RSAD2, MMP3, MMP2, ADA, CDH5, SLC11A1, VDR, PCDH1, STAC, MT1A, PLOD2, NGFRAP1, PLA2G2D1, LOXL2, S100A2, LOC511937, PTGR1, TBXAS1, ACO1, FBN1, SPARC, IDO1, MMP14, FOXP3, ANXA4, MMP13, PROC, FBLN1, DLL4, AOX1, SCN4B, VCAN, AICDA, RCN3, DST, PROS1, VLDLR	139	2387	9249	1.17078	1	0.8503	91.9253
GOTERM_MF_FAT	GO:0043169~cation binding	42	1.56308	0.190535	TF, S100A8, MMP9, F13A1, S100A9, RSAD2, MMP3, MMP2, ADA, CDH5, SLC11A1, VDR, PCDH1, STAC, MT1A, PLOD2, NGFRAP1, PLA2G2D1, LOXL2, S100A2, LOC511937, PTGR1, TBXAS1, ACO1, FBN1, SPARC, IDO1, MMP14, FOXP3, ANXA4, MMP13, PROC, FBLN1, DLL4, AOX1, SCN4B, VCAN, AICDA, RCN3, DST, PROS1, VLDLR	139	2415	9249	1.15721	1	0.870927	94.3713
GOTERM_MF_FAT	GO:0046914~transition metal ion binding	21	0.781541	0.90504	TF, PTGR1, TBXAS1, ACO1, MMP9, RSAD2, IDO1, SPARC, FOXP3, MMP3, MMP14, MMP13, MMP2, ADA, SLC11A1, VDR, STAC, PLOD2, AOX1, AICDA, LOXL2	139	1698	9249	0.822928	1	0.999997	100
Annotation Cluster 13	Enrichment Score: 1.9932587989984138
Category	Term	Count	%	PValue	Genes	List Total	Pop Hits	Pop Total	Fold Enrichment	Bonferroni	Benjamini	FDR
GOTERM_BP_FAT	GO:0040012~regulation of locomotion	7	0.260514	0.000963498	DLL4, MMP9, PECAM1, SNCA, TIE1, CXCL12, ADA	137	74	8785	6.06579	0.726257	0.0883876	1.56796
GOTERM_BP_FAT	GO:0030334~regulation of cell migration	6	0.223297	0.00282799	DLL4, MMP9, PECAM1, TIE1, CXCL12, ADA	137	63	8785	6.10706	0.977767	0.173297	4.5368
GOTERM_BP_FAT	GO:0051270~regulation of cell motion	6	0.223297	0.0044683	DLL4, MMP9, PECAM1, TIE1, CXCL12, ADA	137	70	8785	5.49635	0.997568	0.23025	7.07897
GOTERM_BP_FAT	GO:0030336~negative regulation of cell migration	3	0.111649	0.0412314	DLL4, TIE1, ADA	137	21	8785	9.16058	1	0.629464	49.8577
GOTERM_BP_FAT	GO:0040013~negative regulation of locomotion	3	0.111649	0.044904	DLL4, TIE1, ADA	137	22	8785	8.74419	1	0.648862	52.9154
GOTERM_BP_FAT	GO:0051271~negative regulation of cell motion	3	0.111649	0.0486927	DLL4, TIE1, ADA	137	23	8785	8.36401	1	0.64946	55.8858
Annotation Cluster 14	Enrichment Score: 1.9918605978296011
Category	Term	Count	%	PValue	Genes	List Total	Pop Hits	Pop Total	Fold Enrichment	Bonferroni	Benjamini	FDR
GOTERM_CC_FAT	GO:0016023~cytoplasmic membrane-bounded vesicle	11	0.409378	0.00397312	SLC1A4, SLC11A1, VWF, TF, LOC781339, BGN, SERPINF1, CAPG, TFF3, ABCA1, MMP14	120	218	6966	2.92913	0.415758	0.0404986	4.56001
GOTERM_CC_FAT	GO:0031988~membrane-bounded vesicle	11	0.409378	0.0046635	SLC1A4, SLC11A1, VWF, TF, LOC781339, BGN, SERPINF1, CAPG, TFF3, ABCA1, MMP14	120	223	6966	2.86345	0.467965	0.041197	5.33269
GOTERM_CC_FAT	GO:0031410~cytoplasmic vesicle	11	0.409378	0.0148845	SLC1A4, SLC11A1, VWF, TF, LOC781339, BGN, SERPINF1, CAPG, TFF3, ABCA1, MMP14	120	265	6966	2.40962	0.867942	0.106379	16.1226
GOTERM_CC_FAT	GO:0048770~pigment granule	5	0.186081	0.0150224	SLC1A4, LOC781339, SERPINF1, CAPG, MMP14	120	56	6966	5.18304	0.870414	0.101966	16.2601
GOTERM_CC_FAT	GO:0042470~melanosome	5	0.186081	0.0150224	SLC1A4, LOC781339, SERPINF1, CAPG, MMP14	120	56	6966	5.18304	0.870414	0.101966	16.2601
GOTERM_CC_FAT	GO:0031982~vesicle	11	0.409378	0.0179796	SLC1A4, SLC11A1, VWF, TF, LOC781339, BGN, SERPINF1, CAPG, TFF3, ABCA1, MMP14	120	273	6966	2.33901	0.913649	0.115264	19.1606
Annotation Cluster 15	Enrichment Score: 1.9773139787402316
Category	Term	Count	%	PValue	Genes	List Total	Pop Hits	Pop Total	Fold Enrichment	Bonferroni	Benjamini	FDR
GOTERM_BP_FAT	GO:0032101~regulation of response to external stimulus	6	0.223297	0.00394411	A2M, IDO1, FOXP3, CXCL12, ADA, PROC	137	68	8785	5.65801	0.995065	0.214493	6.27357
GOTERM_BP_FAT	GO:0050777~negative regulation of immune response	3	0.111649	0.00797581	A2M, COL3A1, FOXP3	137	9	8785	21.3747	0.999979	0.328747	12.3032
GOTERM_BP_FAT	GO:0050727~regulation of inflammatory response	4	0.148865	0.0108565	A2M, IDO1, FOXP3, ADA	137	30	8785	8.54988	1	0.342408	16.3862
GOTERM_BP_FAT	GO:0002683~negative regulation of immune system process	4	0.148865	0.0129694	A2M, COL3A1, FOXP3, ADA	137	32	8785	8.01551	1	0.369792	19.2666
GOTERM_BP_FAT	GO:0048585~negative regulation of response to stimulus	4	0.148865	0.0141076	A2M, COL3A1, FOXP3, ADA	137	33	8785	7.77262	1	0.387147	20.7795
GOTERM_BP_FAT	GO:0031348~negative regulation of defense response	3	0.111649	0.0218943	A2M, FOXP3, ADA	137	15	8785	12.8248	1	0.455126	30.4369
Annotation Cluster 16	Enrichment Score: 1.9738622903510556
Category	Term	Count	%	PValue	Genes	List Total	Pop Hits	Pop Total	Fold Enrichment	Bonferroni	Benjamini	FDR
INTERPRO	IPR001007:von Willebrand factor, type C	4	0.148865	0.00369633	NOV, VWF, COL3A1, COL1A1	164	18	9171	12.4268	0.733407	0.0583225	4.95281
SMART	SM00214:VWC	4	0.148865	0.00805172	NOV, VWF, COL3A1, COL1A1	104	18	4364	9.32479	0.505068	0.0751728	8.36638
GOTERM_MF_FAT	GO:0019838~growth factor binding	4	0.148865	0.0402489	NOV, A2M, COL3A1, COL1A1	139	51	9249	5.21879	0.999999	0.519523	42.8329
Annotation Cluster 17	Enrichment Score: 1.9414276042342349
Category	Term	Count	%	PValue	Genes	List Total	Pop Hits	Pop Total	Fold Enrichment	Bonferroni	Benjamini	FDR
INTERPRO	IPR001039:MHC class I, alpha chain, alpha1 and alpha2	5	0.186081	0.00183795	ULBP11, ULBP3, JSP.1, ULBP17, MGC126945	164	30	9171	9.32012	0.481467	0.0358286	2.49187
INTERPRO	IPR011161:MHC class I-like antigen recognition	5	0.186081	0.00263326	ULBP11, ULBP3, JSP.1, ULBP17, MGC126945	164	33	9171	8.47284	0.609884	0.0459752	3.55219
GOTERM_CC_FAT	GO:0042611~MHC protein complex	6	0.223297	0.00398232	BOLA-DQA1, ULBP11, ULBP3, JSP.1, ULBP17, MGC126945	120	62	6966	5.61774	0.416486	0.0377467	4.57034
GOTERM_CC_FAT	GO:0042612~MHC class I protein complex	5	0.186081	0.00703119	ULBP11, ULBP3, JSP.1, ULBP17, MGC126945	120	45	6966	6.45	0.614249	0.0544922	7.93937
GOTERM_BP_FAT	GO:0019882~antigen processing and presentation	6	0.223297	0.008697	BOLA-DQA1, ULBP11, ULBP3, JSP.1, ULBP17, MGC126945	137	82	8785	4.69201	0.999992	0.332906	13.3426
INTERPRO	IPR003006:Immunoglobulin/major histocompatibility complex, conserved site	4	0.148865	0.045418	BOLA-DQA1, JSP.1, SIRPA, MGC126945	164	45	9171	4.97073	1	0.404624	47.1437
INTERPRO	IPR003597:Immunoglobulin C1-set	4	0.148865	0.0532923	BOLA-DQA1, JSP.1, SIRPA, MGC126945	164	48	9171	4.66006	1	0.447033	52.8206
SMART	SM00407:IGc1	4	0.148865	0.103116	BOLA-DQA1, JSP.1, SIRPA, MGC126945	104	48	4364	3.49679	0.999923	0.517277	69.1543
Annotation Cluster 18	Enrichment Score: 1.751830593500632
Category	Term	Count	%	PValue	Genes	List Total	Pop Hits	Pop Total	Fold Enrichment	Bonferroni	Benjamini	FDR
SP_PIR_KEYWORDS	proteoglycan	6	0.223297	4.47781e-05	FMOD, SDC1, BGN, LUM, VCAN, DCN	127	24	7349	14.4665	0.00958132	0.000962288	0.0567741
SP_PIR_KEYWORDS	chondroitin sulfate proteoglycan	4	0.148865	4.79979e-05	FMOD, BGN, VCAN, DCN	127	5	7349	46.2929	0.0102667	0.000937723	0.0608553
UP_SEQ_FEATURE	repeat:LRR 12	4	0.148865	0.00344345	FMOD, BGN, LUM, DCN	99	18	5635	12.6487	0.822386	0.134123	4.84724
UP_SEQ_FEATURE	compositionally biased region:Cys-rich	5	0.186081	0.00403595	FMOD, BGN, LUM, PAMR1, DCN	99	38	5635	7.48937	0.868152	0.144316	5.65891
UP_SEQ_FEATURE	repeat:LRR 11	4	0.148865	0.00701817	FMOD, BGN, LUM, DCN	99	23	5635	9.89899	0.970651	0.209614	9.64731
UP_SEQ_FEATURE	repeat:LRR 10	4	0.148865	0.00992319	FMOD, BGN, LUM, DCN	99	26	5635	8.7568	0.993237	0.268217	13.3811
UP_SEQ_FEATURE	repeat:LRR 9	4	0.148865	0.0121944	FMOD, BGN, LUM, DCN	99	28	5635	8.13131	0.99786	0.303428	16.1996
UP_SEQ_FEATURE	repeat:LRR 8	4	0.148865	0.0147399	FMOD, BGN, LUM, DCN	99	30	5635	7.58923	0.999413	0.310634	19.2572
INTERPRO	IPR000372:Leucine-rich repeat, cysteine-rich flanking region, N-terminal	4	0.148865	0.0275405	FMOD, BGN, LUM, DCN	164	37	9171	6.04548	0.999953	0.282749	31.8237
UP_SEQ_FEATURE	repeat:LRR 7	4	0.148865	0.0296675	FMOD, BGN, LUM, DCN	99	39	5635	5.83787	1	0.466706	35.1966
UP_SEQ_FEATURE	repeat:LRR 6	4	0.148865	0.045198	FMOD, BGN, LUM, DCN	99	46	5635	4.94949	1	0.589848	48.6356
UP_SEQ_FEATURE	repeat:LRR 5	4	0.148865	0.0555594	FMOD, BGN, LUM, DCN	99	50	5635	4.55354	1	0.640413	56.1061
SMART	SM00013:LRRNT	4	0.148865	0.0556056	FMOD, BGN, LUM, DCN	104	37	4364	4.53638	0.993108	0.339516	46.115
INTERPRO	IPR003591:Leucine-rich repeat, typical subtype	4	0.148865	0.0560537	FMOD, LRG1, LUM, DCN	164	49	9171	4.56496	1	0.454309	54.6736
UP_SEQ_FEATURE	repeat:LRR 4	4	0.148865	0.069953	FMOD, BGN, LUM, DCN	99	55	5635	4.13958	1	0.702127	64.8172
INTERPRO	IPR001611:Leucine-rich repeat	5	0.186081	0.0810033	FMOD, BGN, LRG1, LUM, DCN	164	92	9171	3.03917	1	0.577524	68.6111
SP_PIR_KEYWORDS	leucine-rich repeat	5	0.186081	0.0949346	FMOD, BGN, LRG1, LUM, DCN	127	101	7349	2.86466	1	0.467813	71.777
UP_SEQ_FEATURE	repeat:LRR 3	4	0.148865	0.0960653	FMOD, BGN, LUM, DCN	99	63	5635	3.61392	1	0.794283	76.6559
SMART	SM00369:LRR_TYP	4	0.148865	0.108046	FMOD, LRG1, LUM, DCN	104	49	4364	3.42543	0.999952	0.508623	70.9382
UP_SEQ_FEATURE	repeat:LRR 2	4	0.148865	0.110413	FMOD, BGN, LUM, DCN	99	67	5635	3.39816	1	0.830727	81.461
UP_SEQ_FEATURE	repeat:LRR 1	4	0.148865	0.110413	FMOD, BGN, LUM, DCN	99	67	5635	3.39816	1	0.830727	81.461
Annotation Cluster 19	Enrichment Score: 1.615013906898156
Category	Term	Count	%	PValue	Genes	List Total	Pop Hits	Pop Total	Fold Enrichment	Bonferroni	Benjamini	FDR
GOTERM_CC_FAT	GO:0009897~external side of plasma membrane	8	0.29773	0.000209183	VWF, P2RX7, CD8A, CD69, KLRK1, MFGE8, ADA, PDCD1	120	72	6966	6.45	0.0278475	0.00235079	0.244965
GOTERM_BP_FAT	GO:0001775~cell activation	9	0.334946	0.000690543	VWF, P2RX7, CD8A, SNCA, KLRK1, AICDA, FOXP3, CXCL12, ADA	137	125	8785	4.61693	0.604819	0.0689257	1.12612
GOTERM_BP_FAT	GO:0045321~leukocyte activation	8	0.29773	0.00131563	P2RX7, CD8A, SNCA, KLRK1, AICDA, FOXP3, CXCL12, ADA	137	107	8785	4.79432	0.829559	0.0988471	2.13521
GOTERM_BP_FAT	GO:0002821~positive regulation of adaptive immune response	4	0.148865	0.00249765	P2RX7, IDO1, FOXP3, ADA	137	18	8785	14.2498	0.965301	0.170328	4.01702
GOTERM_BP_FAT	GO:0002824~positive regulation of adaptive immune response based on somatic recombination of immune receptors built from immunoglobulin superfamily domains	4	0.148865	0.00249765	P2RX7, IDO1, FOXP3, ADA	137	18	8785	14.2498	0.965301	0.170328	4.01702
GOTERM_BP_FAT	GO:0046649~lymphocyte activation	7	0.260514	0.00250253	P2RX7, CD8A, KLRK1, AICDA, FOXP3, CXCL12, ADA	137	89	8785	5.04347	0.965528	0.162424	4.02471
GOTERM_BP_FAT	GO:0032101~regulation of response to external stimulus	6	0.223297	0.00394411	A2M, IDO1, FOXP3, CXCL12, ADA, PROC	137	68	8785	5.65801	0.995065	0.214493	6.27357
GOTERM_BP_FAT	GO:0050778~positive regulation of immune response	6	0.223297	0.00669473	P2RX7, KLRK1, CFH, IDO1, FOXP3, ADA	137	77	8785	4.99668	0.99988	0.303104	10.4279
GOTERM_BP_FAT	GO:0048584~positive regulation of response to stimulus	7	0.260514	0.00839838	P2RX7, KLRK1, CFH, IDO1, FOXP3, CXCL12, ADA	137	114	8785	3.93744	0.999988	0.332906	12.9136
GOTERM_BP_FAT	GO:0050727~regulation of inflammatory response	4	0.148865	0.0108565	A2M, IDO1, FOXP3, ADA	137	30	8785	8.54988	1	0.342408	16.3862
GOTERM_BP_FAT	GO:0002819~regulation of adaptive immune response	4	0.148865	0.0118858	P2RX7, IDO1, FOXP3, ADA	137	31	8785	8.27408	1	0.352302	17.8013
GOTERM_BP_FAT	GO:0002822~regulation of adaptive immune response based on somatic recombination of immune receptors built from immunoglobulin superfamily domains	4	0.148865	0.0118858	P2RX7, IDO1, FOXP3, ADA	137	31	8785	8.27408	1	0.352302	17.8013
GOTERM_BP_FAT	GO:0002684~positive regulation of immune system process	7	0.260514	0.0164789	P2RX7, KLRK1, CFH, IDO1, FOXP3, ADA, TRAT1	137	132	8785	3.40052	1	0.398032	23.8463
GOTERM_BP_FAT	GO:0051094~positive regulation of developmental process	6	0.223297	0.0307022	P2RX7, SERPINF1, EOMES, FOXP3, NEFL, ADA	137	113	8785	3.40482	1	0.553346	40.0249
GOTERM_BP_FAT	GO:0002697~regulation of immune effector process	4	0.148865	0.0398778	P2RX7, A2M, KLRK1, FOXP3	137	49	8785	5.23462	1	0.623439	48.6844
GOTERM_BP_FAT	GO:0002705~positive regulation of leukocyte mediated immunity	3	0.111649	0.044904	P2RX7, KLRK1, FOXP3	137	22	8785	8.74419	1	0.648862	52.9154
GOTERM_BP_FAT	GO:0002708~positive regulation of lymphocyte mediated immunity	3	0.111649	0.044904	P2RX7, KLRK1, FOXP3	137	22	8785	8.74419	1	0.648862	52.9154
GOTERM_BP_FAT	GO:0042110~T cell activation	4	0.148865	0.0656305	P2RX7, CD8A, FOXP3, CXCL12	137	60	8785	4.27494	1	0.703726	67.1402
GOTERM_BP_FAT	GO:0002699~positive regulation of immune effector process	3	0.111649	0.0736217	P2RX7, KLRK1, FOXP3	137	29	8785	6.63353	1	0.723277	71.4564
GOTERM_BP_FAT	GO:0051240~positive regulation of multicellular organismal process	5	0.186081	0.0775302	P2RX7, SNCA, KLRK1, FOXP3, ADA	137	104	8785	3.08289	1	0.733586	73.368
GOTERM_BP_FAT	GO:0002706~regulation of lymphocyte mediated immunity	3	0.111649	0.0873186	P2RX7, KLRK1, FOXP3	137	32	8785	6.01163	1	0.77225	77.6412
GOTERM_BP_FAT	GO:0051046~regulation of secretion	4	0.148865	0.100374	P2RX7, SNCA, FOXP3, ADA	137	72	8785	3.56245	1	0.808537	82.3451
GOTERM_BP_FAT	GO:0002703~regulation of leukocyte mediated immunity	3	0.111649	0.101704	P2RX7, KLRK1, FOXP3	137	35	8785	5.49635	1	0.809274	82.7683
GOTERM_BP_FAT	GO:0051241~negative regulation of multicellular organismal process	4	0.148865	0.113307	P2RX7, FOXP3, ADA, PROC	137	76	8785	3.37495	1	0.837326	86.076
GOTERM_BP_FAT	GO:0010647~positive regulation of cell communication	5	0.186081	0.139559	P2RX7, CD8A, SNCA, ADA, TRAT1	137	129	8785	2.48543	1	0.880745	91.493
GOTERM_BP_FAT	GO:0001819~positive regulation of cytokine production	3	0.111649	0.153517	P2RX7, KLRK1, FOXP3	137	45	8785	4.27494	1	0.898297	93.4938
GOTERM_BP_FAT	GO:0002253~activation of immune response	3	0.111649	0.164421	KLRK1, CFH, FOXP3	137	47	8785	4.09303	1	0.912719	94.7397
GOTERM_BP_FAT	GO:0002694~regulation of leukocyte activation	3	0.111649	0.380179	SNCA, FOXP3, ADA	137	85	8785	2.2632	1	0.991451	99.9607
GOTERM_BP_FAT	GO:0050865~regulation of cell activation	3	0.111649	0.402148	SNCA, FOXP3, ADA	137	89	8785	2.16149	1	0.993568	99.9783
GOTERM_BP_FAT	GO:0001817~regulation of cytokine production	3	0.111649	0.423749	P2RX7, KLRK1, FOXP3	137	93	8785	2.06852	1	0.994966	99.9881
Annotation Cluster 20	Enrichment Score: 1.5240962304497039
Category	Term	Count	%	PValue	Genes	List Total	Pop Hits	Pop Total	Fold Enrichment	Bonferroni	Benjamini	FDR
GOTERM_BP_FAT	GO:0042060~wound healing	6	0.223297	0.00504035	VWF, F13A1, PECAM1, PROS1, PROC, FN1	137	72	8785	5.34367	0.998877	0.24646	7.95048
KEGG_PATHWAY	bta04610:Complement and coagulation cascades	6	0.223297	0.00994463	VWF, A2M, F13A1, CFH, PROS1, PROC	93	71	4940	4.48887	0.620711	0.21523	10.443
SP_PIR_KEYWORDS	blood coagulation	4	0.148865	0.0129908	VWF, F13A1, PROS1, PROC	127	29	7349	7.98154	0.939874	0.10636	15.2811
GOTERM_BP_FAT	GO:0050817~coagulation	4	0.148865	0.0440908	VWF, F13A1, PROS1, PROC	137	51	8785	5.02934	1	0.648272	52.2538
GOTERM_BP_FAT	GO:0007596~blood coagulation	4	0.148865	0.0440908	VWF, F13A1, PROS1, PROC	137	51	8785	5.02934	1	0.648272	52.2538
GOTERM_BP_FAT	GO:0007599~hemostasis	4	0.148865	0.0485168	VWF, F13A1, PROS1, PROC	137	53	8785	4.83955	1	0.653882	55.7519
GOTERM_BP_FAT	GO:0050878~regulation of body fluid levels	4	0.148865	0.0709659	VWF, F13A1, PROS1, PROC	137	62	8785	4.13704	1	0.714153	70.0848
SP_PIR_KEYWORDS	cleavage on pair of basic residues	5	0.186081	0.1472	VWF, MMP14, PROS1, CDH5, PROC	127	119	7349	2.43135	1	0.584308	86.7266
Annotation Cluster 21	Enrichment Score: 1.5003296563964703
Category	Term	Count	%	PValue	Genes	List Total	Pop Hits	Pop Total	Fold Enrichment	Bonferroni	Benjamini	FDR
INTERPRO	IPR016186:C-type lectin-like	6	0.223297	0.00306765	CD69, CD209, KLRK1, VCAN, STAB2, PLA2R1	164	56	9171	5.99151	0.666073	0.0508896	4.1268
INTERPRO	IPR001304:C-type lectin	5	0.186081	0.0109508	CD69, CD209, KLRK1, VCAN, PLA2R1	164	49	9171	5.7062	0.980376	0.13549	14.0188
SMART	SM00034:CLECT	5	0.186081	0.0275224	CD69, CD209, KLRK1, VCAN, PLA2R1	104	49	4364	4.28179	0.911788	0.198066	26.0381
SP_PIR_KEYWORDS	Lectin	4	0.148865	0.0898671	CD209, KLRK1, VCAN, PLA2R1	127	62	7349	3.7333	1	0.458546	69.7061
GOTERM_MF_FAT	GO:0005529~sugar binding	4	0.148865	0.0983057	CD209, KLRK1, VCAN, PLA2R1	139	74	9249	3.59673	1	0.796996	75.5502
INTERPRO	IPR018378:C-type lectin, conserved site	3	0.111649	0.121872	CD209, VCAN, PLA2R1	164	34	9171	4.93418	1	0.71463	83.1818
Annotation Cluster 22	Enrichment Score: 1.4664480592092948
Category	Term	Count	%	PValue	Genes	List Total	Pop Hits	Pop Total	Fold Enrichment	Bonferroni	Benjamini	FDR
SP_PIR_KEYWORDS	calcium binding	7	0.260514	8.17418e-05	LOC511937, S100A8, S100A9, SPARC, ANXA4, PROC, S100A2	127	43	7349	9.42007	0.0174217	0.00146353	0.103618
SP_PIR_KEYWORDS	EF hand	4	0.148865	0.00597242	S100A8, S100A9, SPARC, S100A2	127	22	7349	10.5211	0.724156	0.0594868	7.3157
UP_SEQ_FEATURE	calcium-binding region:1; low affinity	3	0.111649	0.0176401	S100A8, S100A9, S100A2	99	12	5635	14.2298	0.999866	0.345968	22.614
UP_SEQ_FEATURE	calcium-binding region:2; high affinity	3	0.111649	0.0206137	S100A8, S100A9, S100A2	99	13	5635	13.1352	0.999971	0.377701	25.9205
INTERPRO	IPR013787:S100/CaBP-9k-type, calcium binding, subdomain	3	0.111649	0.0320012	S100A8, S100A9, S100A2	164	16	9171	10.4851	0.999991	0.312405	35.9905
INTERPRO	IPR001751:S100/CaBP-9k-type, calcium binding	3	0.111649	0.0320012	S100A8, S100A9, S100A2	164	16	9171	10.4851	0.999991	0.312405	35.9905
UP_SEQ_FEATURE	domain:EF-hand 2	4	0.148865	0.153642	S100A8, S100A9, RCN3, S100A2	99	78	5635	2.91893	1	0.901872	90.954
UP_SEQ_FEATURE	domain:EF-hand 1	4	0.148865	0.153642	S100A8, S100A9, RCN3, S100A2	99	78	5635	2.91893	1	0.901872	90.954
INTERPRO	IPR018247:EF-HAND 1	5	0.186081	0.189591	S100A8, S100A9, SPARC, RCN3, S100A2	164	127	9171	2.2016	1	0.85402	94.4064
INTERPRO	IPR011992:EF-Hand type	5	0.186081	0.222813	S100A8, S100A9, SPARC, RCN3, S100A2	164	136	9171	2.05591	1	0.894576	96.8498
INTERPRO	IPR018249:EF-HAND 2	4	0.148865	0.408047	S100A8, S100A9, RCN3, S100A2	164	130	9171	1.72064	1	0.987134	99.9248
Annotation Cluster 23	Enrichment Score: 1.4388917074399483
Category	Term	Count	%	PValue	Genes	List Total	Pop Hits	Pop Total	Fold Enrichment	Bonferroni	Benjamini	FDR
INTERPRO	IPR013128:Peptidase C1A, papain	3	0.111649	0.0155423	CTSC, CTSL1, CTSW	164	11	9171	15.2511	0.996273	0.18104	19.3353
INTERPRO	IPR000668:Peptidase C1A, papain C-terminal	3	0.111649	0.0155423	CTSC, CTSL1, CTSW	164	11	9171	15.2511	0.996273	0.18104	19.3353
SMART	SM00645:Pept_C1	3	0.111649	0.0264099	CTSC, CTSL1, CTSW	104	11	4364	11.4441	0.902563	0.207731	25.1186
GOTERM_MF_FAT	GO:0008234~cysteine-type peptidase activity	3	0.111649	0.275192	CTSC, CTSL1, CTSW	139	69	9249	2.89302	1	0.930131	98.7487
Annotation Cluster 24	Enrichment Score: 1.388088057884869
Category	Term	Count	%	PValue	Genes	List Total	Pop Hits	Pop Total	Fold Enrichment	Bonferroni	Benjamini	FDR
GOTERM_BP_FAT	GO:0045321~leukocyte activation	8	0.29773	0.00131563	P2RX7, CD8A, SNCA, KLRK1, AICDA, FOXP3, CXCL12, ADA	137	107	8785	4.79432	0.829559	0.0988471	2.13521
GOTERM_BP_FAT	GO:0046649~lymphocyte activation	7	0.260514	0.00250253	P2RX7, CD8A, KLRK1, AICDA, FOXP3, CXCL12, ADA	137	89	8785	5.04347	0.965528	0.162424	4.02471
GOTERM_BP_FAT	GO:0002252~immune effector process	5	0.186081	0.0229481	CD8A, CFH, RSAD2, AICDA, FOXP3	137	70	8785	4.58029	1	0.464221	31.6555
GOTERM_BP_FAT	GO:0002460~adaptive immune response based on somatic recombination of immune receptors built from immunoglobulin superfamily domains	3	0.111649	0.126968	CD8A, AICDA, FOXP3	137	40	8785	4.80931	1	0.865395	89.2052
GOTERM_BP_FAT	GO:0002250~adaptive immune response	3	0.111649	0.126968	CD8A, AICDA, FOXP3	137	40	8785	4.80931	1	0.865395	89.2052
GOTERM_BP_FAT	GO:0002449~lymphocyte mediated immunity	3	0.111649	0.126968	CD8A, AICDA, FOXP3	137	40	8785	4.80931	1	0.865395	89.2052
GOTERM_BP_FAT	GO:0002443~leukocyte mediated immunity	3	0.111649	0.153517	CD8A, AICDA, FOXP3	137	45	8785	4.27494	1	0.898297	93.4938
GOTERM_BP_FAT	GO:0002520~immune system development	4	0.148865	0.330977	CD8A, AICDA, FOXP3, ADA	137	131	8785	1.95799	1	0.984321	99.8625
Annotation Cluster 25	Enrichment Score: 1.3729197445526384
Category	Term	Count	%	PValue	Genes	List Total	Pop Hits	Pop Total	Fold Enrichment	Bonferroni	Benjamini	FDR
GOTERM_BP_FAT	GO:0009991~response to extracellular stimulus	5	0.186081	0.0108396	VDR, P2RX7, SFRP2, TIE1, MEST	137	56	8785	5.72536	1	0.350025	16.3627
GOTERM_BP_FAT	GO:0033273~response to vitamin	3	0.111649	0.0412314	VDR, TIE1, MEST	137	21	8785	9.16058	1	0.629464	49.8577
GOTERM_BP_FAT	GO:0007584~response to nutrient	3	0.111649	0.0486927	VDR, TIE1, MEST	137	23	8785	8.36401	1	0.64946	55.8858
GOTERM_BP_FAT	GO:0031667~response to nutrient levels	3	0.111649	0.148121	VDR, TIE1, MEST	137	44	8785	4.3721	1	0.894004	92.7794
Annotation Cluster 26	Enrichment Score: 1.3384476378724208
Category	Term	Count	%	PValue	Genes	List Total	Pop Hits	Pop Total	Fold Enrichment	Bonferroni	Benjamini	FDR
GOTERM_BP_FAT	GO:0015718~monocarboxylic acid transport	3	0.111649	0.0191671	SLC1A4, LOC511937, SLCO2A1	137	14	8785	13.7409	1	0.431896	27.1879
GOTERM_BP_FAT	GO:0046942~carboxylic acid transport	4	0.148865	0.0709659	SLC1A4, LOC511937, SLCO2A1, LOC511982	137	62	8785	4.13704	1	0.714153	70.0848
GOTERM_BP_FAT	GO:0015849~organic acid transport	4	0.148865	0.0709659	SLC1A4, LOC511937, SLCO2A1, LOC511982	137	62	8785	4.13704	1	0.714153	70.0848
Annotation Cluster 27	Enrichment Score: 1.3091037105499714
Category	Term	Count	%	PValue	Genes	List Total	Pop Hits	Pop Total	Fold Enrichment	Bonferroni	Benjamini	FDR
GOTERM_BP_FAT	GO:0050850~positive regulation of calcium-mediated signaling	3	0.111649	0.00986921	CD8A, ADA, TRAT1	137	10	8785	19.2372	0.999998	0.340693	15.0074
GOTERM_BP_FAT	GO:0050848~regulation of calcium-mediated signaling	3	0.111649	0.0141849	CD8A, ADA, TRAT1	137	12	8785	16.031	1	0.381232	20.8813
GOTERM_BP_FAT	GO:0010647~positive regulation of cell communication	5	0.186081	0.139559	P2RX7, CD8A, SNCA, ADA, TRAT1	137	129	8785	2.48543	1	0.880745	91.493
GOTERM_BP_FAT	GO:0009967~positive regulation of signal transduction	4	0.148865	0.296974	P2RX7, CD8A, ADA, TRAT1	137	123	8785	2.08534	1	0.977373	99.6901
Annotation Cluster 28	Enrichment Score: 1.1871819518656688
Category	Term	Count	%	PValue	Genes	List Total	Pop Hits	Pop Total	Fold Enrichment	Bonferroni	Benjamini	FDR
GOTERM_BP_FAT	GO:0045321~leukocyte activation	8	0.29773	0.00131563	P2RX7, CD8A, SNCA, KLRK1, AICDA, FOXP3, CXCL12, ADA	137	107	8785	4.79432	0.829559	0.0988471	2.13521
GOTERM_BP_FAT	GO:0046649~lymphocyte activation	7	0.260514	0.00250253	P2RX7, CD8A, KLRK1, AICDA, FOXP3, CXCL12, ADA	137	89	8785	5.04347	0.965528	0.162424	4.02471
KEGG_PATHWAY	bta05340:Primary immunodeficiency	4	0.148865	0.0209935	CD8A, AICDA, IL7R, ADA	93	32	4940	6.63978	0.872298	0.254729	20.8752
GOTERM_BP_FAT	GO:0051240~positive regulation of multicellular organismal process	5	0.186081	0.0775302	P2RX7, SNCA, KLRK1, FOXP3, ADA	137	104	8785	3.08289	1	0.733586	73.368
GOTERM_BP_FAT	GO:0030098~lymphocyte differentiation	3	0.111649	0.169924	CD8A, FOXP3, ADA	137	48	8785	4.00776	1	0.918164	95.2797
GOTERM_BP_FAT	GO:0002521~leukocyte differentiation	3	0.111649	0.243513	CD8A, FOXP3, ADA	137	61	8785	3.15364	1	0.959471	98.9696
GOTERM_BP_FAT	GO:0002520~immune system development	4	0.148865	0.330977	CD8A, AICDA, FOXP3, ADA	137	131	8785	1.95799	1	0.984321	99.8625
GOTERM_BP_FAT	GO:0030097~hemopoiesis	3	0.111649	0.500924	CD8A, FOXP3, ADA	137	108	8785	1.78122	1	0.997942	99.9989
GOTERM_BP_FAT	GO:0048534~hemopoietic or lymphoid organ development	3	0.111649	0.562271	CD8A, FOXP3, ADA	137	121	8785	1.58985	1	0.999073	99.9999
Annotation Cluster 29	Enrichment Score: 1.1329770569543367
Category	Term	Count	%	PValue	Genes	List Total	Pop Hits	Pop Total	Fold Enrichment	Bonferroni	Benjamini	FDR
INTERPRO	IPR016060:Complement control module	4	0.148865	0.0238006	PAMR1, CFH, VCAN, FN1	164	35	9171	6.39094	0.999816	0.256612	28.138
SP_PIR_KEYWORDS	sushi	3	0.111649	0.0583714	PAMR1, CFH, VCAN	127	23	7349	7.54776	0.999998	0.341065	53.3626
INTERPRO	IPR000436:Sushi/SCR/CCP	3	0.111649	0.116	PAMR1, CFH, VCAN	164	33	9171	5.0837	1	0.705567	81.5717
SMART	SM00032:CCP	3	0.111649	0.182325	PAMR1, CFH, VCAN	104	33	4364	3.81469	1	0.688852	88.6445
Annotation Cluster 30	Enrichment Score: 1.0635869555654158
Category	Term	Count	%	PValue	Genes	List Total	Pop Hits	Pop Total	Fold Enrichment	Bonferroni	Benjamini	FDR
UP_SEQ_FEATURE	topological domain:Extracellular	21	0.781541	0.000596078	MUC1, TSPAN1, CD8A, SLC6A15, CLDN11, PIGR, MMP14, AQP1, SIRPA, CDH5, TRAT1, SLC1A4, SLC11A1, SDC1, GPBAR1, PECAM1, SCN4B, TM4SF20, TIE1, PI16, PLA2R1	99	527	5635	2.26813	0.258236	0.0417771	0.855197
UP_SEQ_FEATURE	topological domain:Cytoplasmic	22	0.818757	0.0143313	MUC1, TSPAN1, CD8A, SLC6A15, CLDN11, PIGR, MMP14, AQP1, SIRPA, CDH5, TRAT1, SLC1A4, SLC11A1, ST6GALNAC6, SDC1, GPBAR1, PECAM1, SCN4B, TM4SF20, TIE1, PI16, PLA2R1	99	739	5635	1.69448	0.999277	0.316568	18.7735
UP_SEQ_FEATURE	transmembrane region	27	1.00484	0.16064	TSPAN1, CD8A, CLDN11, AQP1, CDH5, SLC1A4, SLC11A1, ST6GALNAC6, TIE1, PI16, PLA2R1, MEST, MUC1, TBXAS1, SLC6A15, PIGR, MMP14, SIRPA, TRAT1, SDC1, GPBAR1, DGAT2, PECAM1, SCN4B, TM4SF20, IFI6, TMEM176A	99	1235	5635	1.24439	1	0.906628	91.9737
SP_PIR_KEYWORDS	membrane	40	1.48865	0.162408	TSPAN1, S100A8, CD8A, S100A9, KLRK1, RSAD2, CLDN11, AQP1, MMP2, ADA, CDH5, SLC1A4, SLC11A1, ST6GALNAC6, PCDH1, TIE1, PI16, PLA2R1, MEST, MUC1, LOC511937, TBXAS1, SLC6A15, MFGE8, PIGR, MMP14, SIRPA, TRAT1, SDC1, DGAT2, GPBAR1, SLC6A7, CD209, PECAM1, SCN4B, TM4SF20, JSP.1, IFI6, VLDLR, TMEM176A	127	1963	7349	1.17914	1	0.605188	89.4348
SP_PIR_KEYWORDS	transmembrane	34	1.26535	0.17057	TSPAN1, CD8A, KLRK1, CLDN11, AQP1, CDH5, SLC1A4, SLC11A1, TMEM37, ST6GALNAC6, PCDH1, TIE1, PI16, PLA2R1, MEST, MUC1, TBXAS1, SLC6A15, PIGR, MMP14, SIRPA, MGC126945, TRAT1, SDC1, DGAT2, GPBAR1, SLC6A7, CD209, PECAM1, SCN4B, TM4SF20, JSP.1, IFI6, TMEM176A	127	1639	7349	1.2004	1	0.616091	90.6688
GOTERM_CC_FAT	GO:0016021~integral to membrane	43	1.6003	0.968009	TSPAN1, CD8A, KLRK1, ITGA11, ABCA1, CLDN11, AQP1, CDH5, LOC528412, SLC1A4, SLC11A1, ST6GALNAC6, TMEM37, PCDH1, LOC521568, TIE1, PLA2R1, PI16, MEST, MUC1, TBXAS1, SLC6A15, STAB2, PIGR, MMP14, SIRPA, MGC126945, TRAT1, PROM1, SDC1, P2RX7, DGAT2, GPBAR1, SLC6A7, GPR37, CD209, DLL4, PECAM1, SCN4B, JSP.1, TM4SF20, IFI6, TMEM176A	120	3006	6966	0.830389	1	0.999988	100
GOTERM_CC_FAT	GO:0031224~intrinsic to membrane	44	1.63751	0.975118	TSPAN1, CD8A, KLRK1, ITGA11, CTXN3, ABCA1, CLDN11, AQP1, CDH5, LOC528412, SLC1A4, SLC11A1, ST6GALNAC6, TMEM37, PCDH1, LOC521568, TIE1, PLA2R1, PI16, MEST, MUC1, TBXAS1, SLC6A15, STAB2, PIGR, MMP14, SIRPA, MGC126945, TRAT1, PROM1, SDC1, P2RX7, DGAT2, GPBAR1, SLC6A7, GPR37, CD209, DLL4, PECAM1, SCN4B, JSP.1, TM4SF20, IFI6, TMEM176A	120	3101	6966	0.82367	1	0.999991	100
Annotation Cluster 31	Enrichment Score: 1.0343856577032715
Category	Term	Count	%	PValue	Genes	List Total	Pop Hits	Pop Total	Fold Enrichment	Bonferroni	Benjamini	FDR
GOTERM_BP_FAT	GO:0006869~lipid transport	5	0.186081	0.0312051	LOC511937, P2RX7, LOC531557, ABCA1, SLCO2A1	137	77	8785	4.1639	1	0.552431	40.533
GOTERM_BP_FAT	GO:0010876~lipid localization	5	0.186081	0.0456819	LOC511937, P2RX7, LOC531557, ABCA1, SLCO2A1	137	87	8785	3.68529	1	0.649146	53.5402
GOTERM_BP_FAT	GO:0046903~secretion	3	0.111649	0.553188	LOC511937, P2RX7, ABCA1	137	119	8785	1.61657	1	0.999032	99.9998
Annotation Cluster 32	Enrichment Score: 1.0098619947820742
Category	Term	Count	%	PValue	Genes	List Total	Pop Hits	Pop Total	Fold Enrichment	Bonferroni	Benjamini	FDR
GOTERM_MF_FAT	GO:0004175~endopeptidase activity	12	0.446595	0.00689719	GZMM, HTRA1, MMP9, PAMR1, CTSC, MMP14, MMP3, PRSS35, MMP2, MMP13, CTSL1, PROC	139	312	9249	2.55921	0.904272	0.229484	8.99073
GOTERM_MF_FAT	GO:0070011~peptidase activity, acting on L-amino acid peptides	13	0.483811	0.0193676	MMP9, PAMR1, MMP3, MMP14, MMP13, MMP2, CTSL1, CTSW, PROC, GZMM, HTRA1, CTSC, PRSS35	139	410	9249	2.10979	0.99868	0.424493	23.3726
GOTERM_MF_FAT	GO:0008233~peptidase activity	13	0.483811	0.0244291	MMP9, PAMR1, MMP3, MMP14, MMP13, MMP2, CTSL1, CTSW, PROC, GZMM, HTRA1, CTSC, PRSS35	139	424	9249	2.04013	0.999772	0.428192	28.5844
GOTERM_BP_FAT	GO:0006508~proteolysis	16	0.59546	0.052687	MMP9, PAMR1, MMP3, MMP14, MMP13, MMP2, CTSL1, CTSW, PROC, GZMM, P2RX7, ISG15, HTRA1, CFH, CTSC, PRSS35	137	615	8785	1.66827	1	0.651555	58.8263
SP_PIR_KEYWORDS	Protease	8	0.29773	0.0743969	MMP9, CTSC, MMP14, MMP3, MMP2, MMP13, CTSL1, PROC	127	214	7349	2.16322	1	0.405138	62.4863
GOTERM_MF_FAT	GO:0004252~serine-type endopeptidase activity	5	0.186081	0.102082	GZMM, HTRA1, PAMR1, PRSS35, PROC	139	119	9249	2.79578	1	0.795473	76.9077
UP_SEQ_FEATURE	domain:Peptidase S1	3	0.111649	0.13492	PAMR1, PRSS35, PROC	99	37	5635	4.61507	1	0.874395	87.6026
GOTERM_MF_FAT	GO:0008236~serine-type peptidase activity	5	0.186081	0.142761	GZMM, HTRA1, PAMR1, PRSS35, PROC	139	135	9249	2.46443	1	0.83481	87.7145
GOTERM_MF_FAT	GO:0017171~serine hydrolase activity	5	0.186081	0.145493	GZMM, HTRA1, PAMR1, PRSS35, PROC	139	136	9249	2.44631	1	0.830806	88.2369
INTERPRO	IPR018114:Peptidase S1/S6, chymotrypsin/Hap, active site	3	0.111649	0.262464	PAMR1, PRSS35, PROC	164	56	9171	2.99575	1	0.92941	98.4641
INTERPRO	IPR001254:Peptidase S1 and S6, chymotrypsin/Hap	3	0.111649	0.288921	PAMR1, PRSS35, PROC	164	60	9171	2.79604	1	0.944881	99.0694
SMART	SM00020:Tryp_SPc	3	0.111649	0.416373	PAMR1, PRSS35, PROC	104	60	4364	2.09808	1	0.946499	99.7032
SP_PIR_KEYWORDS	hydrolase	12	0.446595	0.644274	MMP9, CTSC, AICDA, PLA2G2D1, MMP14, MMP3, MMP2, MMP13, ADA, CTSL1, PROC, MEST	127	689	7349	1.00783	1	0.983678	99.9998
Annotation Cluster 33	Enrichment Score: 1.0095803674711856
Category	Term	Count	%	PValue	Genes	List Total	Pop Hits	Pop Total	Fold Enrichment	Bonferroni	Benjamini	FDR
GOTERM_BP_FAT	GO:0006873~cellular ion homeostasis	8	0.29773	0.00889297	VDR, SLC11A1, TF, P2RX7, ACO1, SNCA, CLDN11, IFI6	137	151	8785	3.3973	0.999994	0.329805	13.623
GOTERM_BP_FAT	GO:0055082~cellular chemical homeostasis	8	0.29773	0.00952504	VDR, SLC11A1, TF, P2RX7, ACO1, SNCA, CLDN11, IFI6	137	153	8785	3.35289	0.999997	0.339617	14.5217
GOTERM_BP_FAT	GO:0050801~ion homeostasis	8	0.29773	0.0153587	VDR, SLC11A1, TF, P2RX7, ACO1, SNCA, CLDN11, IFI6	137	168	8785	3.05353	1	0.390608	22.4118
GOTERM_BP_FAT	GO:0019725~cellular homeostasis	9	0.334946	0.0183624	VDR, SLC11A1, TF, P2RX7, ACO1, SNCA, PRDX4, CLDN11, IFI6	137	215	8785	2.68426	1	0.425078	26.2023
GOTERM_BP_FAT	GO:0048878~chemical homeostasis	9	0.334946	0.0197823	VDR, SLC11A1, TF, P2RX7, ACO1, SNCA, ABCA1, CLDN11, IFI6	137	218	8785	2.64732	1	0.435243	27.933
GOTERM_BP_FAT	GO:0042592~homeostatic process	12	0.446595	0.0208365	VDR, SLC11A1, TF, P2RX7, ACO1, SNCA, PRDX4, ABCA1, CLDN11, FOXP3, IFI6, CD7	137	353	8785	2.17986	1	0.445443	29.1932
GOTERM_BP_FAT	GO:0051899~membrane depolarization	3	0.111649	0.0247716	P2RX7, SNCA, IFI6	137	16	8785	12.0233	1	0.483678	33.7169
GOTERM_BP_FAT	GO:0007586~digestion	3	0.111649	0.0486927	VDR, P2RX7, ACO1	137	23	8785	8.36401	1	0.64946	55.8858
GOTERM_BP_FAT	GO:0030005~cellular di-, tri-valent inorganic cation homeostasis	5	0.186081	0.0523631	VDR, SLC11A1, TF, P2RX7, ACO1	137	91	8785	3.5233	1	0.660027	58.5949
GOTERM_BP_FAT	GO:0055066~di-, tri-valent inorganic cation homeostasis	5	0.186081	0.0595496	VDR, SLC11A1, TF, P2RX7, ACO1	137	95	8785	3.37495	1	0.687205	63.453
GOTERM_MF_FAT	GO:0005506~iron ion binding	8	0.29773	0.0596311	SLC11A1, TF, TBXAS1, PLOD2, ACO1, AOX1, RSAD2, IDO1	139	233	9249	2.28462	1	0.629356	56.6948
GOTERM_BP_FAT	GO:0006879~cellular iron ion homeostasis	3	0.111649	0.0607113	SLC11A1, TF, ACO1	137	26	8785	7.39893	1	0.689365	64.1861
GOTERM_BP_FAT	GO:0042391~regulation of membrane potential	4	0.148865	0.0630354	P2RX7, SNCA, CLDN11, IFI6	137	59	8785	4.3474	1	0.698424	65.6116
GOTERM_BP_FAT	GO:0055072~iron ion homeostasis	3	0.111649	0.064921	SLC11A1, TF, ACO1	137	27	8785	7.1249	1	0.704511	66.7288
GOTERM_BP_FAT	GO:0030003~cellular cation homeostasis	5	0.186081	0.0672351	VDR, SLC11A1, TF, P2RX7, ACO1	137	99	8785	3.23859	1	0.707958	68.0532
GOTERM_BP_FAT	GO:0055080~cation homeostasis	5	0.186081	0.102759	VDR, SLC11A1, TF, P2RX7, ACO1	137	115	8785	2.788	1	0.809105	83.097
SP_PIR_KEYWORDS	iron	6	0.223297	0.150403	SLC11A1, TF, TBXAS1, ACO1, AOX1, RSAD2	127	164	7349	2.11705	1	0.583592	87.3452
GOTERM_BP_FAT	GO:0015674~di-, tri-valent inorganic cation transport	4	0.148865	0.217801	VDR, SLC11A1, TF, P2RX7	137	104	8785	2.46631	1	0.948918	98.2177
GOTERM_BP_FAT	GO:0006875~cellular metal ion homeostasis	3	0.111649	0.266541	VDR, SLC11A1, P2RX7	137	65	8785	2.95957	1	0.966194	99.3793
GOTERM_BP_FAT	GO:0055065~metal ion homeostasis	3	0.111649	0.283817	VDR, SLC11A1, P2RX7	137	68	8785	2.829	1	0.973169	99.5801
GOTERM_MF_FAT	GO:0046873~metal ion transmembrane transporter activity	5	0.186081	0.328686	SLC11A1, P2RX7, KCNT1, SNCA, SCN4B	139	194	9249	1.71494	1	0.956795	99.5593
GOTERM_BP_FAT	GO:0050877~neurological system process	6	0.223297	0.369916	SLC1A4, P2RX7, SNCA, COL1A1, CLDN11, NEFL	137	258	8785	1.49126	1	0.990273	99.9486
GOTERM_BP_FAT	GO:0030001~metal ion transport	6	0.223297	0.453	VDR, SLC11A1, TF, P2RX7, KCNT1, SCN4B	137	285	8785	1.34998	1	0.996273	99.9949
GOTERM_BP_FAT	GO:0019226~transmission of nerve impulse	3	0.111649	0.455383	P2RX7, SNCA, CLDN11	137	99	8785	1.94315	1	0.99628	99.9953
GOTERM_BP_FAT	GO:0006812~cation transport	7	0.260514	0.478177	VDR, SLC11A1, TF, P2RX7, KCNT1, SCN4B, AQP1	137	357	8785	1.25734	1	0.997278	99.9977
GOTERM_BP_FAT	GO:0006811~ion transport	9	0.334946	0.539345	VDR, SLC11A1, TF, P2RX7, LOC521568, KCNT1, SCN4B, AQP1, LOC528412	137	511	8785	1.12939	1	0.998846	99.9997
SP_PIR_KEYWORDS	ion transport	3	0.111649	0.895864	SLC11A1, TF, SCN4B	127	220	7349	0.789084	1	0.999698	100
SP_PIR_KEYWORDS	transport	7	0.260514	0.990429	SLC1A4, SLC11A1, TF, SLC6A7, SCN4B, SLC6A15, AQP1	127	740	7349	0.547382	1	1	100
Annotation Cluster 34	Enrichment Score: 0.9641935375062614
Category	Term	Count	%	PValue	Genes	List Total	Pop Hits	Pop Total	Fold Enrichment	Bonferroni	Benjamini	FDR
GOTERM_BP_FAT	GO:0010639~negative regulation of organelle organization	3	0.111649	0.0736217	CAPG, SNCA, FOXP3	137	29	8785	6.63353	1	0.723277	71.4564
GOTERM_BP_FAT	GO:0033043~regulation of organelle organization	4	0.148865	0.113307	CAPG, SNCA, ELN, FOXP3	137	76	8785	3.37495	1	0.837326	86.076
GOTERM_BP_FAT	GO:0051129~negative regulation of cellular component organization	3	0.111649	0.153517	CAPG, SNCA, FOXP3	137	45	8785	4.27494	1	0.898297	93.4938
Annotation Cluster 35	Enrichment Score: 0.9568793355712808
Category	Term	Count	%	PValue	Genes	List Total	Pop Hits	Pop Total	Fold Enrichment	Bonferroni	Benjamini	FDR
GOTERM_MF_FAT	GO:0005506~iron ion binding	8	0.29773	0.0596311	SLC11A1, TF, TBXAS1, PLOD2, ACO1, AOX1, RSAD2, IDO1	139	233	9249	2.28462	1	0.629356	56.6948
SP_PIR_KEYWORDS	iron-sulfur	3	0.111649	0.109218	ACO1, AOX1, RSAD2	127	33	7349	5.26056	1	0.508579	76.9332
GOTERM_MF_FAT	GO:0051540~metal cluster binding	3	0.111649	0.129506	ACO1, AOX1, RSAD2	139	42	9249	4.75283	1	0.813475	84.8608
GOTERM_MF_FAT	GO:0051536~iron-sulfur cluster binding	3	0.111649	0.129506	ACO1, AOX1, RSAD2	139	42	9249	4.75283	1	0.813475	84.8608
SP_PIR_KEYWORDS	iron	6	0.223297	0.150403	SLC11A1, TF, TBXAS1, ACO1, AOX1, RSAD2	127	164	7349	2.11705	1	0.583592	87.3452
Annotation Cluster 36	Enrichment Score: 0.9062744946720066
Category	Term	Count	%	PValue	Genes	List Total	Pop Hits	Pop Total	Fold Enrichment	Bonferroni	Benjamini	FDR
GOTERM_BP_FAT	GO:0045321~leukocyte activation	8	0.29773	0.00131563	P2RX7, CD8A, SNCA, KLRK1, AICDA, FOXP3, CXCL12, ADA	137	107	8785	4.79432	0.829559	0.0988471	2.13521
GOTERM_BP_FAT	GO:0051240~positive regulation of multicellular organismal process	5	0.186081	0.0775302	P2RX7, SNCA, KLRK1, FOXP3, ADA	137	104	8785	3.08289	1	0.733586	73.368
GOTERM_BP_FAT	GO:0051046~regulation of secretion	4	0.148865	0.100374	P2RX7, SNCA, FOXP3, ADA	137	72	8785	3.56245	1	0.808537	82.3451
GOTERM_BP_FAT	GO:0032268~regulation of cellular protein metabolic process	5	0.186081	0.252383	P2RX7, A2M, ACO1, SNCA, FOXP3	137	165	8785	1.94315	1	0.962562	99.1508
GOTERM_BP_FAT	GO:0060341~regulation of cellular localization	3	0.111649	0.418385	P2RX7, SNCA, FOXP3	137	92	8785	2.091	1	0.9947	99.9862
GOTERM_BP_FAT	GO:0031399~regulation of protein modification process	3	0.111649	0.439686	P2RX7, SNCA, FOXP3	137	96	8785	2.00388	1	0.995841	99.9925
GOTERM_BP_FAT	GO:0010604~positive regulation of macromolecule metabolic process	3	0.111649	0.952958	P2RX7, SNCA, FOXP3	137	305	8785	0.630729	1	1	100
Annotation Cluster 37	Enrichment Score: 0.9018624377902391
Category	Term	Count	%	PValue	Genes	List Total	Pop Hits	Pop Total	Fold Enrichment	Bonferroni	Benjamini	FDR
GOTERM_MF_FAT	GO:0042802~identical protein binding	9	0.334946	0.0327327	SLC11A1, VWF, LOC781339, CD8A, SNCA, COL1A2, COL1A1, FOXP3, NEFL	139	249	9249	2.40504	0.999987	0.485032	36.4287
GOTERM_MF_FAT	GO:0042803~protein homodimerization activity	5	0.186081	0.145493	SLC11A1, VWF, LOC781339, CD8A, FOXP3	139	136	9249	2.44631	1	0.830806	88.2369
GOTERM_MF_FAT	GO:0046983~protein dimerization activity	5	0.186081	0.413607	SLC11A1, VWF, LOC781339, CD8A, FOXP3	139	219	9249	1.51917	1	0.976941	99.9301
Annotation Cluster 38	Enrichment Score: 0.8800516207566175
Category	Term	Count	%	PValue	Genes	List Total	Pop Hits	Pop Total	Fold Enrichment	Bonferroni	Benjamini	FDR
INTERPRO	IPR003191:Guanylate-binding protein, C-terminal	3	0.111649	0.00184012	GBP5, LOC512486, LOC507055	164	4	9171	41.9405	0.48187	0.0340149	2.49479
INTERPRO	IPR015894:Guanylate-binding protein, N-terminal	3	0.111649	0.00819407	GBP5, LOC512486, LOC507055	164	8	9171	20.9703	0.946993	0.110854	10.6726
GOTERM_MF_FAT	GO:0003924~GTPase activity	6	0.223297	0.0100197	LOC781710, GBP5, LOC512486, LOC507055, LOC781675, LOC782954	139	88	9249	4.53679	0.967084	0.289211	12.8094
GOTERM_MF_FAT	GO:0005525~GTP binding	7	0.260514	0.255014	LOC781710, GBP5, LOC512486, IFI47, LOC507055, LOC781675, LOC782954	139	286	9249	1.62859	1	0.927652	98.1815
GOTERM_MF_FAT	GO:0032561~guanyl ribonucleotide binding	7	0.260514	0.272746	LOC781710, GBP5, LOC512486, IFI47, LOC507055, LOC781675, LOC782954	139	293	9249	1.58968	1	0.932735	98.6899
GOTERM_MF_FAT	GO:0019001~guanyl nucleotide binding	7	0.260514	0.280439	LOC781710, GBP5, LOC512486, IFI47, LOC507055, LOC781675, LOC782954	139	296	9249	1.57357	1	0.929801	98.8665
GOTERM_MF_FAT	GO:0017076~purine nucleotide binding	18	0.669892	0.822551	NMNAT2, LOC781710, GBP5, LOC512486, TDRD9, IFI47, LOC507055, ABCA1, LOC781675, LOC528412, ACTG2, LOC781339, P2RX7, LOC521568, AOX1, TIE1, BMPR1B, LOC782954	139	1363	9249	0.878732	1	0.999952	100
GOTERM_MF_FAT	GO:0032553~ribonucleotide binding	17	0.632676	0.83513	NMNAT2, LOC781710, GBP5, LOC512486, TDRD9, IFI47, LOC507055, ABCA1, LOC781675, LOC528412, ACTG2, LOC781339, P2RX7, LOC521568, TIE1, BMPR1B, LOC782954	139	1304	9249	0.867464	1	0.999962	100
GOTERM_MF_FAT	GO:0032555~purine ribonucleotide binding	17	0.632676	0.83513	NMNAT2, LOC781710, GBP5, LOC512486, TDRD9, IFI47, LOC507055, ABCA1, LOC781675, LOC528412, ACTG2, LOC781339, P2RX7, LOC521568, TIE1, BMPR1B, LOC782954	139	1304	9249	0.867464	1	0.999962	100
GOTERM_MF_FAT	GO:0000166~nucleotide binding	19	0.707108	0.936381	LOC788414, NMNAT2, LOC781710, GBP5, LOC512486, TDRD9, IFI47, LOC507055, ABCA1, LOC781675, LOC528412, ACTG2, LOC781339, P2RX7, LOC521568, AOX1, TIE1, BMPR1B, LOC782954	139	1615	9249	0.782818	1	1	100
Annotation Cluster 39	Enrichment Score: 0.8451822910172725
Category	Term	Count	%	PValue	Genes	List Total	Pop Hits	Pop Total	Fold Enrichment	Bonferroni	Benjamini	FDR
GOTERM_BP_FAT	GO:0016044~membrane organization	7	0.260514	0.0159265	P2RX7, LOC781339, SNCA, MFGE8, ABCA1, TIE1, PLA2R1	137	131	8785	3.42648	1	0.394561	23.1419
GOTERM_BP_FAT	GO:0006897~endocytosis	5	0.186081	0.0325099	P2RX7, SNCA, MFGE8, ABCA1, PLA2R1	137	78	8785	4.11052	1	0.560703	41.8325
GOTERM_BP_FAT	GO:0010324~membrane invagination	5	0.186081	0.0325099	P2RX7, SNCA, MFGE8, ABCA1, PLA2R1	137	78	8785	4.11052	1	0.560703	41.8325
GOTERM_BP_FAT	GO:0006909~phagocytosis	3	0.111649	0.0486927	P2RX7, MFGE8, ABCA1	137	23	8785	8.36401	1	0.64946	55.8858
GOTERM_CC_FAT	GO:0000267~cell fraction	7	0.260514	0.218514	ACTG2, P2RX7, LOC781339, TBXAS1, DGAT2, SNCA, ABCA1	120	237	6966	1.71456	1	0.72202	94.4456
GOTERM_BP_FAT	GO:0051050~positive regulation of transport	3	0.111649	0.318234	P2RX7, SNCA, MFGE8	137	74	8785	2.59963	1	0.982087	99.8127
GOTERM_CC_FAT	GO:0005624~membrane fraction	5	0.186081	0.462528	P2RX7, TBXAS1, DGAT2, SNCA, ABCA1	120	204	6966	1.42279	1	0.927148	99.931
GOTERM_BP_FAT	GO:0008610~lipid biosynthetic process	4	0.148865	0.488323	P2RX7, TBXAS1, DGAT2, LOC782922	137	169	8785	1.51773	1	0.997531	99.9983
GOTERM_CC_FAT	GO:0005626~insoluble fraction	5	0.186081	0.492491	P2RX7, TBXAS1, DGAT2, SNCA, ABCA1	120	212	6966	1.3691	1	0.932324	99.9648
GOTERM_BP_FAT	GO:0016192~vesicle-mediated transport	5	0.186081	0.557305	P2RX7, SNCA, MFGE8, ABCA1, PLA2R1	137	254	8785	1.26229	1	0.999066	99.9998
Annotation Cluster 40	Enrichment Score: 0.8037755037266665
Category	Term	Count	%	PValue	Genes	List Total	Pop Hits	Pop Total	Fold Enrichment	Bonferroni	Benjamini	FDR
GOTERM_BP_FAT	GO:0007266~Rho protein signal transduction	3	0.111649	0.0191671	PECAM1, COL1A2, ABCA1	137	14	8785	13.7409	1	0.431896	27.1879
GOTERM_BP_FAT	GO:0007265~Ras protein signal transduction	3	0.111649	0.064921	PECAM1, COL1A2, ABCA1	137	27	8785	7.1249	1	0.704511	66.7288
GOTERM_BP_FAT	GO:0007242~intracellular signaling cascade	8	0.29773	0.658153	RASAL1, VDR, P2RX7, STAC, PECAM1, SOCS1, COL1A2, ABCA1	137	498	8785	1.03011	1	0.999832	100
GOTERM_BP_FAT	GO:0007264~small GTPase mediated signal transduction	3	0.111649	0.744094	PECAM1, COL1A2, ABCA1	137	170	8785	1.1316	1	0.999975	100
Annotation Cluster 41	Enrichment Score: 0.6253514126337497
Category	Term	Count	%	PValue	Genes	List Total	Pop Hits	Pop Total	Fold Enrichment	Bonferroni	Benjamini	FDR
GOTERM_BP_FAT	GO:0006836~neurotransmitter transport	3	0.111649	0.197858	P2RX7, SLC6A7, SLC6A15	137	53	8785	3.62967	1	0.935664	97.307
GOTERM_CC_FAT	GO:0005887~integral to plasma membrane	6	0.223297	0.246617	P2RX7, SLC6A7, ITGA11, SLC6A15, STAB2, ABCA1	120	197	6966	1.76802	1	0.757295	96.3845
GOTERM_CC_FAT	GO:0031226~intrinsic to plasma membrane	6	0.223297	0.272627	P2RX7, SLC6A7, ITGA11, SLC6A15, STAB2, ABCA1	120	205	6966	1.69902	1	0.784487	97.6051
Annotation Cluster 42	Enrichment Score: 0.6202328261354567
Category	Term	Count	%	PValue	Genes	List Total	Pop Hits	Pop Total	Fold Enrichment	Bonferroni	Benjamini	FDR
GOTERM_MF_FAT	GO:0015370~solute:sodium symporter activity	3	0.111649	0.119547	SLC1A4, SLC6A7, SLC6A15	139	40	9249	4.99047	1	0.822084	82.3255
SP_PIR_KEYWORDS	Symport	3	0.111649	0.143669	SLC1A4, SLC6A7, SLC6A15	127	39	7349	4.45124	1	0.584192	86.0125
GOTERM_MF_FAT	GO:0015294~solute:cation symporter activity	3	0.111649	0.176341	SLC1A4, SLC6A7, SLC6A15	139	51	9249	3.91409	1	0.855472	92.8688
GOTERM_MF_FAT	GO:0015293~symporter activity	3	0.111649	0.264092	SLC1A4, SLC6A7, SLC6A15	139	67	9249	2.97938	1	0.930435	98.4611
SP_PIR_KEYWORDS	transport	7	0.260514	0.990429	SLC1A4, SLC11A1, TF, SLC6A7, SCN4B, SLC6A15, AQP1	127	740	7349	0.547382	1	1	100
Annotation Cluster 43	Enrichment Score: 0.610057695657618
Category	Term	Count	%	PValue	Genes	List Total	Pop Hits	Pop Total	Fold Enrichment	Bonferroni	Benjamini	FDR
GOTERM_BP_FAT	GO:0032269~negative regulation of cellular protein metabolic process	3	0.111649	0.169924	A2M, SNCA, FOXP3	137	48	8785	4.00776	1	0.918164	95.2797
GOTERM_BP_FAT	GO:0051248~negative regulation of protein metabolic process	3	0.111649	0.175458	A2M, SNCA, FOXP3	137	49	8785	3.92596	1	0.921299	95.77
GOTERM_BP_FAT	GO:0032268~regulation of cellular protein metabolic process	5	0.186081	0.252383	P2RX7, A2M, ACO1, SNCA, FOXP3	137	165	8785	1.94315	1	0.962562	99.1508
GOTERM_BP_FAT	GO:0010605~negative regulation of macromolecule metabolic process	5	0.186081	0.482258	VDR, A2M, SNCA, FOXP3, TRAT1	137	231	8785	1.38797	1	0.997362	99.9979
Annotation Cluster 44	Enrichment Score: 0.606887999034668
Category	Term	Count	%	PValue	Genes	List Total	Pop Hits	Pop Total	Fold Enrichment	Bonferroni	Benjamini	FDR
GOTERM_BP_FAT	GO:0032844~regulation of homeostatic process	3	0.111649	0.116688	P2RX7, ADA, IFI6	137	38	8785	5.06243	1	0.843215	86.9214
GOTERM_BP_FAT	GO:0042981~regulation of apoptosis	8	0.29773	0.172862	P2RX7, MMP9, SNCA, NGFRAP1, NEFL, ADA, IFI6, PROC	137	295	8785	1.73896	1	0.919977	95.5463
GOTERM_BP_FAT	GO:0043067~regulation of programmed cell death	8	0.29773	0.179037	P2RX7, MMP9, SNCA, NGFRAP1, NEFL, ADA, IFI6, PROC	137	298	8785	1.72145	1	0.923784	96.0612
GOTERM_BP_FAT	GO:0010941~regulation of cell death	8	0.29773	0.181116	P2RX7, MMP9, SNCA, NGFRAP1, NEFL, ADA, IFI6, PROC	137	299	8785	1.71569	1	0.924393	96.2216
GOTERM_BP_FAT	GO:0043066~negative regulation of apoptosis	5	0.186081	0.190161	SNCA, NEFL, ADA, IFI6, PROC	137	146	8785	2.19603	1	0.932779	96.8506
GOTERM_BP_FAT	GO:0043069~negative regulation of programmed cell death	5	0.186081	0.196468	SNCA, NEFL, ADA, IFI6, PROC	137	148	8785	2.16635	1	0.935914	97.2295
GOTERM_BP_FAT	GO:0060548~negative regulation of cell death	5	0.186081	0.196468	SNCA, NEFL, ADA, IFI6, PROC	137	148	8785	2.16635	1	0.935914	97.2295
GOTERM_BP_FAT	GO:0043065~positive regulation of apoptosis	3	0.111649	0.557746	P2RX7, MMP9, NGFRAP1	137	120	8785	1.6031	1	0.999032	99.9998
GOTERM_BP_FAT	GO:0043068~positive regulation of programmed cell death	3	0.111649	0.562271	P2RX7, MMP9, NGFRAP1	137	121	8785	1.58985	1	0.999073	99.9999
GOTERM_BP_FAT	GO:0010942~positive regulation of cell death	3	0.111649	0.566764	P2RX7, MMP9, NGFRAP1	137	122	8785	1.57682	1	0.999112	99.9999
Annotation Cluster 45	Enrichment Score: 0.5909648795023823
Category	Term	Count	%	PValue	Genes	List Total	Pop Hits	Pop Total	Fold Enrichment	Bonferroni	Benjamini	FDR
GOTERM_BP_FAT	GO:0030030~cell projection organization	5	0.186081	0.100325	P2RX7, CAPG, BMPR1B, NEFL, CXCL12	137	114	8785	2.81246	1	0.812061	82.3292
GOTERM_BP_FAT	GO:0032989~cellular component morphogenesis	5	0.186081	0.131266	ACTG2, P2RX7, BMPR1B, NEFL, CXCL12	137	126	8785	2.54461	1	0.871999	90.0443
GOTERM_BP_FAT	GO:0007409~axonogenesis	3	0.111649	0.214879	BMPR1B, NEFL, CXCL12	137	56	8785	3.43522	1	0.947962	98.1053
GOTERM_BP_FAT	GO:0000902~cell morphogenesis	4	0.148865	0.225942	P2RX7, BMPR1B, NEFL, CXCL12	137	106	8785	2.41978	1	0.953732	98.4986
GOTERM_BP_FAT	GO:0048812~neuron projection morphogenesis	3	0.111649	0.23203	BMPR1B, NEFL, CXCL12	137	59	8785	3.26055	1	0.955509	98.6809
GOTERM_BP_FAT	GO:0048667~cell morphogenesis involved in neuron differentiation	3	0.111649	0.255021	BMPR1B, NEFL, CXCL12	137	63	8785	3.05353	1	0.961994	99.1986
GOTERM_BP_FAT	GO:0048858~cell projection morphogenesis	3	0.111649	0.266541	BMPR1B, NEFL, CXCL12	137	65	8785	2.95957	1	0.966194	99.3793
GOTERM_BP_FAT	GO:0032990~cell part morphogenesis	3	0.111649	0.301059	BMPR1B, NEFL, CXCL12	137	71	8785	2.70947	1	0.978087	99.7184
GOTERM_BP_FAT	GO:0031175~neuron projection development	3	0.111649	0.312519	BMPR1B, NEFL, CXCL12	137	73	8785	2.63524	1	0.981042	99.7852
GOTERM_BP_FAT	GO:0000904~cell morphogenesis involved in differentiation	3	0.111649	0.329631	BMPR1B, NEFL, CXCL12	137	76	8785	2.53121	1	0.984496	99.8579
GOTERM_BP_FAT	GO:0048666~neuron development	3	0.111649	0.46056	BMPR1B, NEFL, CXCL12	137	100	8785	1.92372	1	0.996458	99.996
GOTERM_BP_FAT	GO:0030182~neuron differentiation	3	0.111649	0.562271	BMPR1B, NEFL, CXCL12	137	121	8785	1.58985	1	0.999073	99.9999
Annotation Cluster 46	Enrichment Score: 0.5116481004531553
Category	Term	Count	%	PValue	Genes	List Total	Pop Hits	Pop Total	Fold Enrichment	Bonferroni	Benjamini	FDR
GOTERM_BP_FAT	GO:0014706~striated muscle tissue development	3	0.111649	0.266541	ACTG2, ELN, HSPG2	137	65	8785	2.95957	1	0.966194	99.3793
GOTERM_BP_FAT	GO:0060537~muscle tissue development	3	0.111649	0.283817	ACTG2, ELN, HSPG2	137	68	8785	2.829	1	0.973169	99.5801
GOTERM_BP_FAT	GO:0007517~muscle organ development	3	0.111649	0.385703	ACTG2, ELN, HSPG2	137	86	8785	2.23689	1	0.991896	99.9661
Annotation Cluster 47	Enrichment Score: 0.47879375893555853
Category	Term	Count	%	PValue	Genes	List Total	Pop Hits	Pop Total	Fold Enrichment	Bonferroni	Benjamini	FDR
UP_SEQ_FEATURE	nucleotide phosphate-binding region:NADP	3	0.111649	0.129025	PTGR1, AKR1B1, LOC782922	99	36	5635	4.74327	1	0.869392	86.3285
SP_PIR_KEYWORDS	nadp	3	0.111649	0.369538	PTGR1, AKR1B1, LOC782922	127	75	7349	2.31465	1	0.878788	99.7121
SP_PIR_KEYWORDS	oxidoreductase	6	0.223297	0.767868	PTGR1, TBXAS1, AOX1, AKR1B1, PRDX4, LOC782922	127	370	7349	0.93837	1	0.996684	100
Annotation Cluster 48	Enrichment Score: 0.4711322440904673
Category	Term	Count	%	PValue	Genes	List Total	Pop Hits	Pop Total	Fold Enrichment	Bonferroni	Benjamini	FDR
GOTERM_BP_FAT	GO:0016044~membrane organization	7	0.260514	0.0159265	P2RX7, LOC781339, SNCA, MFGE8, ABCA1, TIE1, PLA2R1	137	131	8785	3.42648	1	0.394561	23.1419
GOTERM_CC_FAT	GO:0000267~cell fraction	7	0.260514	0.218514	ACTG2, P2RX7, LOC781339, TBXAS1, DGAT2, SNCA, ABCA1	120	237	6966	1.71456	1	0.72202	94.4456
GOTERM_BP_FAT	GO:0006461~protein complex assembly	3	0.111649	0.772166	VWF, P2RX7, LOC781339	137	180	8785	1.06873	1	0.999988	100
GOTERM_BP_FAT	GO:0070271~protein complex biogenesis	3	0.111649	0.772166	VWF, P2RX7, LOC781339	137	180	8785	1.06873	1	0.999988	100
GOTERM_BP_FAT	GO:0065003~macromolecular complex assembly	4	0.148865	0.833845	VWF, P2RX7, LOC781339, ABCA1	137	291	8785	0.881431	1	0.999998	100
GOTERM_BP_FAT	GO:0043933~macromolecular complex subunit organization	4	0.148865	0.861193	VWF, P2RX7, LOC781339, ABCA1	137	308	8785	0.83278	1	1	100
Annotation Cluster 49	Enrichment Score: 0.45911481761040646
Category	Term	Count	%	PValue	Genes	List Total	Pop Hits	Pop Total	Fold Enrichment	Bonferroni	Benjamini	FDR
GOTERM_MF_FAT	GO:0008509~anion transmembrane transporter activity	4	0.148865	0.120292	SLC1A4, LOC521568, ABCA1, LOC528412	139	81	9249	3.2859	1	0.811955	82.5279
GOTERM_MF_FAT	GO:0005254~chloride channel activity	3	0.111649	0.124502	SLC1A4, LOC521568, LOC528412	139	41	9249	4.86875	1	0.811643	83.6324
GOTERM_MF_FAT	GO:0005253~anion channel activity	3	0.111649	0.14996	SLC1A4, LOC521568, LOC528412	139	46	9249	4.33954	1	0.830806	89.0468
GOTERM_MF_FAT	GO:0046873~metal ion transmembrane transporter activity	5	0.186081	0.328686	SLC11A1, P2RX7, KCNT1, SNCA, SCN4B	139	194	9249	1.71494	1	0.956795	99.5593
GOTERM_MF_FAT	GO:0005216~ion channel activity	6	0.223297	0.370843	SLC1A4, P2RX7, LOC521568, KCNT1, SCN4B, LOC528412	139	268	9249	1.48969	1	0.969522	99.8177
GOTERM_MF_FAT	GO:0022838~substrate specific channel activity	6	0.223297	0.379784	SLC1A4, P2RX7, LOC521568, KCNT1, SCN4B, LOC528412	139	271	9249	1.4732	1	0.970411	99.85
GOTERM_MF_FAT	GO:0022803~passive transmembrane transporter activity	6	0.223297	0.391703	SLC1A4, P2RX7, LOC521568, KCNT1, SCN4B, LOC528412	139	275	9249	1.45177	1	0.972275	99.8848
GOTERM_MF_FAT	GO:0015267~channel activity	6	0.223297	0.391703	SLC1A4, P2RX7, LOC521568, KCNT1, SCN4B, LOC528412	139	275	9249	1.45177	1	0.972275	99.8848
GOTERM_BP_FAT	GO:0030001~metal ion transport	6	0.223297	0.453	VDR, SLC11A1, TF, P2RX7, KCNT1, SCN4B	137	285	8785	1.34998	1	0.996273	99.9949
GOTERM_BP_FAT	GO:0006812~cation transport	7	0.260514	0.478177	VDR, SLC11A1, TF, P2RX7, KCNT1, SCN4B, AQP1	137	357	8785	1.25734	1	0.997278	99.9977
GOTERM_BP_FAT	GO:0006811~ion transport	9	0.334946	0.539345	VDR, SLC11A1, TF, P2RX7, LOC521568, KCNT1, SCN4B, AQP1, LOC528412	137	511	8785	1.12939	1	0.998846	99.9997
GOTERM_MF_FAT	GO:0005261~cation channel activity	3	0.111649	0.709842	P2RX7, KCNT1, SCN4B	139	165	9249	1.20981	1	0.999442	100
GOTERM_MF_FAT	GO:0022836~gated channel activity	3	0.111649	0.812796	P2RX7, KCNT1, SCN4B	139	204	9249	0.978523	1	0.999944	100
Annotation Cluster 50	Enrichment Score: 0.4104521428124583
Category	Term	Count	%	PValue	Genes	List Total	Pop Hits	Pop Total	Fold Enrichment	Bonferroni	Benjamini	FDR
GOTERM_CC_FAT	GO:0005773~vacuole	4	0.148865	0.280707	SLC11A1, TSPAN1, CTSC, ADA	120	108	6966	2.15	1	0.772973	97.8991
GOTERM_CC_FAT	GO:0005764~lysosome	3	0.111649	0.457294	TSPAN1, CTSC, ADA	120	90	6966	1.935	1	0.930165	99.9227
GOTERM_CC_FAT	GO:0000323~lytic vacuole	3	0.111649	0.457294	TSPAN1, CTSC, ADA	120	90	6966	1.935	1	0.930165	99.9227
Annotation Cluster 51	Enrichment Score: 0.3614388720101385
Category	Term	Count	%	PValue	Genes	List Total	Pop Hits	Pop Total	Fold Enrichment	Bonferroni	Benjamini	FDR
GOTERM_BP_FAT	GO:0016044~membrane organization	7	0.260514	0.0159265	P2RX7, LOC781339, SNCA, MFGE8, ABCA1, TIE1, PLA2R1	137	131	8785	3.42648	1	0.394561	23.1419
GOTERM_BP_FAT	GO:0016310~phosphorylation	4	0.148865	0.989151	P2RX7, SNCA, TIE1, BMPR1B	137	521	8785	0.492315	1	1	100
GOTERM_BP_FAT	GO:0006468~protein amino acid phosphorylation	3	0.111649	0.99355	P2RX7, TIE1, BMPR1B	137	448	8785	0.429402	1	1	100
GOTERM_BP_FAT	GO:0006793~phosphorus metabolic process	4	0.148865	0.997969	P2RX7, SNCA, TIE1, BMPR1B	137	646	8785	0.397053	1	1	100
GOTERM_BP_FAT	GO:0006796~phosphate metabolic process	4	0.148865	0.997969	P2RX7, SNCA, TIE1, BMPR1B	137	646	8785	0.397053	1	1	100
Annotation Cluster 52	Enrichment Score: 0.24827665406626534
Category	Term	Count	%	PValue	Genes	List Total	Pop Hits	Pop Total	Fold Enrichment	Bonferroni	Benjamini	FDR
GOTERM_BP_FAT	GO:0019953~sexual reproduction	4	0.148865	0.411187	MFGE8, CLDN11, BMPR1B, CXCL12	137	150	8785	1.70998	1	0.994249	99.9831
GOTERM_BP_FAT	GO:0007276~gamete generation	3	0.111649	0.553188	CLDN11, BMPR1B, CXCL12	137	119	8785	1.61657	1	0.999032	99.9998
GOTERM_BP_FAT	GO:0032504~multicellular organism reproduction	3	0.111649	0.668329	CLDN11, BMPR1B, CXCL12	137	147	8785	1.30865	1	0.999861	100
GOTERM_BP_FAT	GO:0048609~reproductive process in a multicellular organism	3	0.111649	0.668329	CLDN11, BMPR1B, CXCL12	137	147	8785	1.30865	1	0.999861	100
Annotation Cluster 53	Enrichment Score: 0.14272364010317332
Category	Term	Count	%	PValue	Genes	List Total	Pop Hits	Pop Total	Fold Enrichment	Bonferroni	Benjamini	FDR
GOTERM_BP_FAT	GO:0008219~cell death	4	0.148865	0.642112	P2RX7, NGFRAP1, IFI6, DDIT4	137	212	8785	1.20989	1	0.99978	100
GOTERM_BP_FAT	GO:0016265~death	4	0.148865	0.657754	P2RX7, NGFRAP1, IFI6, DDIT4	137	217	8785	1.18201	1	0.999839	100
GOTERM_BP_FAT	GO:0006915~apoptosis	3	0.111649	0.79267	NGFRAP1, IFI6, DDIT4	137	188	8785	1.02326	1	0.999993	100
GOTERM_BP_FAT	GO:0012501~programmed cell death	3	0.111649	0.802303	NGFRAP1, IFI6, DDIT4	137	192	8785	1.00194	1	0.999995	100
Annotation Cluster 54	Enrichment Score: 0.12516495058716734
Category	Term	Count	%	PValue	Genes	List Total	Pop Hits	Pop Total	Fold Enrichment	Bonferroni	Benjamini	FDR
GOTERM_BP_FAT	GO:0051173~positive regulation of nitrogen compound metabolic process	4	0.148865	0.712715	LOC781339, KLRK1, ABCA1, FOXP3	137	236	8785	1.08685	1	0.999948	100
GOTERM_BP_FAT	GO:0031328~positive regulation of cellular biosynthetic process	4	0.148865	0.76535	LOC781339, KLRK1, ABCA1, FOXP3	137	257	8785	0.99804	1	0.999985	100
GOTERM_BP_FAT	GO:0009891~positive regulation of biosynthetic process	4	0.148865	0.772198	LOC781339, KLRK1, ABCA1, FOXP3	137	260	8785	0.986524	1	0.999987	100
Annotation Cluster 55	Enrichment Score: 0.03199426687953649
Category	Term	Count	%	PValue	Genes	List Total	Pop Hits	Pop Total	Fold Enrichment	Bonferroni	Benjamini	FDR
GOTERM_MF_FAT	GO:0017076~purine nucleotide binding	18	0.669892	0.822551	NMNAT2, LOC781710, GBP5, LOC512486, TDRD9, IFI47, LOC507055, ABCA1, LOC781675, LOC528412, ACTG2, LOC781339, P2RX7, LOC521568, AOX1, TIE1, BMPR1B, LOC782954	139	1363	9249	0.878732	1	0.999952	100
GOTERM_MF_FAT	GO:0032553~ribonucleotide binding	17	0.632676	0.83513	NMNAT2, LOC781710, GBP5, LOC512486, TDRD9, IFI47, LOC507055, ABCA1, LOC781675, LOC528412, ACTG2, LOC781339, P2RX7, LOC521568, TIE1, BMPR1B, LOC782954	139	1304	9249	0.867464	1	0.999962	100
GOTERM_MF_FAT	GO:0032555~purine ribonucleotide binding	17	0.632676	0.83513	NMNAT2, LOC781710, GBP5, LOC512486, TDRD9, IFI47, LOC507055, ABCA1, LOC781675, LOC528412, ACTG2, LOC781339, P2RX7, LOC521568, TIE1, BMPR1B, LOC782954	139	1304	9249	0.867464	1	0.999962	100
GOTERM_MF_FAT	GO:0000166~nucleotide binding	19	0.707108	0.936381	LOC788414, NMNAT2, LOC781710, GBP5, LOC512486, TDRD9, IFI47, LOC507055, ABCA1, LOC781675, LOC528412, ACTG2, LOC781339, P2RX7, LOC521568, AOX1, TIE1, BMPR1B, LOC782954	139	1615	9249	0.782818	1	1	100
SP_PIR_KEYWORDS	atp-binding	6	0.223297	0.95857	NMNAT2, ACTG2, LOC781339, ABCA1, TIE1, BMPR1B	127	537	7349	0.646549	1	0.999984	100
GOTERM_MF_FAT	GO:0030554~adenyl nucleotide binding	11	0.409378	0.969112	NMNAT2, ACTG2, P2RX7, LOC781339, LOC521568, AOX1, TDRD9, ABCA1, TIE1, BMPR1B, LOC528412	139	1083	9249	0.67584	1	1	100
GOTERM_MF_FAT	GO:0001883~purine nucleoside binding	11	0.409378	0.97161	NMNAT2, ACTG2, P2RX7, LOC781339, LOC521568, AOX1, TDRD9, ABCA1, TIE1, BMPR1B, LOC528412	139	1093	9249	0.669657	1	1	100
GOTERM_MF_FAT	GO:0001882~nucleoside binding	11	0.409378	0.97302	NMNAT2, ACTG2, P2RX7, LOC781339, LOC521568, AOX1, TDRD9, ABCA1, TIE1, BMPR1B, LOC528412	139	1099	9249	0.666001	1	1	100
GOTERM_MF_FAT	GO:0005524~ATP binding	10	0.372162	0.973802	NMNAT2, ACTG2, P2RX7, LOC781339, LOC521568, TDRD9, ABCA1, TIE1, BMPR1B, LOC528412	139	1018	9249	0.65363	1	1	100
GOTERM_MF_FAT	GO:0032559~adenyl ribonucleotide binding	10	0.372162	0.975806	NMNAT2, ACTG2, P2RX7, LOC781339, LOC521568, TDRD9, ABCA1, TIE1, BMPR1B, LOC528412	139	1027	9249	0.647902	1	1	100
SP_PIR_KEYWORDS	nucleotide-binding	7	0.260514	0.991957	NMNAT2, ACTG2, LOC781339, ABCA1, TIE1, BMPR1B, LOC782954	127	754	7349	0.537219	1	1	100
Annotation Cluster 56	Enrichment Score: 0.023848471349800206
Category	Term	Count	%	PValue	Genes	List Total	Pop Hits	Pop Total	Fold Enrichment	Bonferroni	Benjamini	FDR
SP_PIR_KEYWORDS	cytoskeleton	3	0.111649	0.86051	ACTG2, S100A8, S100A9	127	199	7349	0.872354	1	0.999237	100
GOTERM_CC_FAT	GO:0042995~cell projection	3	0.111649	0.899237	LOC511937, SNCA, NEFL	120	223	6966	0.780942	1	0.999645	100
GOTERM_CC_FAT	GO:0005856~cytoskeleton	7	0.260514	0.935794	SLC1A4, LOC511937, ACTG2, S100A8, S100A9, SNCA, NEFL	120	575	6966	0.706696	1	0.999905	100
GOTERM_CC_FAT	GO:0044430~cytoskeletal part	3	0.111649	0.993403	SLC1A4, ACTG2, NEFL	120	403	6966	0.432134	1	1	100
GOTERM_CC_FAT	GO:0043228~non-membrane-bounded organelle	7	0.260514	0.99997	SLC1A4, LOC511937, ACTG2, S100A8, S100A9, SNCA, NEFL	120	1148	6966	0.353963	1	1	100
GOTERM_CC_FAT	GO:0043232~intracellular non-membrane-bounded organelle	7	0.260514	0.99997	SLC1A4, LOC511937, ACTG2, S100A8, S100A9, SNCA, NEFL	120	1148	6966	0.353963	1	1	100
Annotation Cluster 57	Enrichment Score: 0.006965771738547264
Category	Term	Count	%	PValue	Genes	List Total	Pop Hits	Pop Total	Fold Enrichment	Bonferroni	Benjamini	FDR
GOTERM_MF_FAT	GO:0003700~transcription factor activity	5	0.186081	0.913674	VDR, TSC22D3, IRF7, EOMES, FOXP3	139	455	9249	0.731204	1	0.999998	100
GOTERM_MF_FAT	GO:0030528~transcription regulator activity	5	0.186081	0.995239	VDR, TSC22D3, IRF7, EOMES, FOXP3	139	715	9249	0.465312	1	1	100
GOTERM_BP_FAT	GO:0006355~regulation of transcription, DNA-dependent	5	0.186081	0.99939	VDR, TSC22D3, IRF7, EOMES, FOXP3	137	845	8785	0.379432	1	1	100
GOTERM_BP_FAT	GO:0051252~regulation of RNA metabolic process	5	0.186081	0.999503	VDR, TSC22D3, IRF7, EOMES, FOXP3	137	860	8785	0.372814	1	1	100
GOTERM_MF_FAT	GO:0003677~DNA binding	5	0.186081	0.99993	VDR, TSC22D3, IRF7, EOMES, FOXP3	139	1038	9249	0.320518	1	1	100
GOTERM_BP_FAT	GO:0045449~regulation of transcription	5	0.186081	0.999994	VDR, TSC22D3, IRF7, EOMES, FOXP3	137	1166	8785	0.274975	1	1	100
