# Supplementary material for: Immunological Response to Single Pathogen Challenge with Agents of the Bovine Respiratory Disease Complex: An RNA-Sequence Analysis of the Bronchial Lymph Node Transcriptome
Source: PLoS One. 2015 Jun 29;10(6):e0131459. doi: 10.1371/journal.pone.0131459 (PMC4484807; doi:10.1371/journal.pone.0131459)
Supplement: S14 Table — (XLSX) [file pone.0131459.s014.xlsx]

## Sheet: Sheet1
	Gene	Locus	QTL position (Mb)	Regulation direction	Challenge Pathogen	Predicted regulator
	RND3	2:45800467-45822009	45-46	up	BRSV and BVDV	yes
	DPYD	3:45563731-46487165	46-47	up	BVDV	no
	HEYL	3:107032467-107047976	107-108	up	BVDV, M. haemolytica and P. multocida	yes
	MACF1	3:107179185-107518531	107-108	down	BVDV and IBR	no
	NDUFS5	3:107558700-107564198	107-108	up	BRSV	no
	PABPC4	3:107084062-107097490	107-108	up	M. haemolytica	no
	RHBDL2	3:107634941-107692937	107-108	up	BRSV	no
	NDUFA10	3:119633965-119794438	107-108	up	BRSV	no
	ATXN7L1	4:46973135-47228658	47-48	up	BRSV	no
	NAMPT	4:47594641-47635332	47-48	down	BRSV, BVDV and M. haemolytica	yes
	PRKAR2B	4:48435187-48534701	47-48	down	BRSV	no
	MRPL42	5:23426160-23456894	23-24	up	BRSV	no
	SOCS2	5:23523980-23528860	23-24	up	BVDV and IBR	yes
	ANXA3	6:95065255-95136949	95-96	up	BVDV and IBR	no
	LOC505766	6:95299039-95441926	95-96	down	BRSV	no
	LOC100337213	7:10817301-10830303	10-11	up	BVDV and M. haemolytica	no
	LOC100299045	7:11603226-11670611	11-12	up	BRSV and IBR	no
	LOC100336607	7:11942159-12006955	11-12	up	BRSV	no
	LOC505037	7:11439933-11494856	11-12	up	BVDV, M. haemolytica, M. bovis and P. multocida	no
	CORO2A	8:63703644-63729124	63-64	down	BRSV and IBR	no
	NANS	8:63650014-63669724	63-64	up	BRSV, BVDV, IBR and M. haemolytica	no
	TDRD7	8:63071038-63173719	63-64	inconsistency	BRSV, IBR and M. haemolytica	no
	TSTD2	8:63270040-63297745	63-64	down	BVDV	no
	APC	10:1116668-1212429	1-2	down	BRSV, BVDV and IBR	yes
	EPB41L4A	10:1467375-1761415	1-2	up	BVDV	no
	REEP5	10:1043712-1094331	1-2	up	BRSV, M. haemolytica and P. multocida	no
	SRP19	10:1102146-1110236	1-2	up	BRSV	no
	LPCAT4	10:28331828-28339118	28-29	up	IBR	no
	NOP10	10:28351839-28355350	28-29	up	BRSV and M. haemolytica	no
	RYR3	10:28592758-29164488	28-29	down	IBR	yes
	SLC12A6	10:28357074-28439037	28-29	down	BRSV, BVDV and IBR	no
	TMEM85	10:28441592-28445103	28-29	up	BRSV and IBR	no
	FOSL2	11:71329771-71349193	71-72	up	BRSV and M. haemolytica	no
	MRPL33	11:71923197-71931587	71-72	up	BRSV and IBR	no
	RBKS	11:71827004-71921665	71-72	up	BRSV and IBR	no
	GEN1	11:80969484-80998105	80-81	down	BVDV and IBR	no
	KCNS3	11:80842560-80858325	80-81	up	BVDV	no
	CDK8	12:33321675-33370251	33-34	up	M. haemolytica	no
	LOC782264	12:33620249-34054911	33-34	down	M. haemolytica	no
	DNAJC3	12:76958977-77024110	77-78	up	BRSV, BVDV, IBR and M. haemolytica	no
	ISM1	13:6959810-7051654	6-7	up	BVDV and M. haemolytica	no
	LOC100140952	13:53845854-53878560	53-54	up	BRSV and IBR	no
	SIRPA	13:53668953-53710782	53-54	up	BRSV, BVDV, IBR, M. haemolytica and M. bovis	yes
	SIRPB1	13:53970895-53988803	53-54	up	BRSV and IBR	no
	SNRPB	13:53134601-53143623	53-54	up	BRSV	no
	TGM3	13:53261631-53304213	53-54	up	BRSV, BVDV, IBR, M. haemolytica, P.multocida and M. bovis	no
	BLCAP	13:67114711-67125197	67-68	down	M. haemolytica	no
	BPI	13:67835159-67861379	67-68	up	BRSV and IBR	yes
	LBP	13:67875397-67910095	67-68	up	BRSV, BVDV, IBR, M. haemolytica and P. multocida	yes
	LOC514211	13:67749212-67833278	67-68	up	BRSV and IBR	no
	LOC514978	13:67954993-67982705	67-68	up	BRSV	no
	RPRD1B	13:67570197-67628071	67-68	down	BVDV, IBR and M. haemolytica	no
	TGM2	13:67663134-67697607	67-68	up	BVDV and P. multocida	yes
	VSTM2L	13:67460323-67498859	67-68	down	BRSV, IBR, M. haemolytica and P. multocida	no
	PHF20L1	14:9551696-9598565	9-10	down	BRSV, BVDV and IBR	no
	TMEM71	14:9615579-9648138	9-10	down	BRSV and IBR	no
	EFR3A	14:10169833-10282441	10-11	down	BRSV	no
	ASAP1	14:11327980-11696284	10-11	down	BRSV	no
	CTHRC1	14:63311959-63328221	63-64	up	BRSV, BVDV, IBR, M. haemolytica, P.multocida and M. bovis	no
	CEP57	15:14717410-14757469	14-15	down	BVDV and IBR	no
	JRKL	15:14117813-14119612	14-15	down	BRSV, BVDV and IBR	no
	C1QTNF5	15:30448398-30450337	30-31	up	BRSV, BVDV, IBR, M. haemolytica and P.multocida	no
	C2CD2L	15:30214149-30224044	30-31	up	BVDV	no
	CBL	15:30313783-30406073	30-31	down	BRSV, BVDV, IBR and P. multocida	yes
	DPAGT1	15:30204633-30209462	30-31	up	IBR and M. haemolytica	yes
	HMBS	15:30194979-30202275	30-31	up	BRSV	no
	MCAM	15:30413026-30422213	30-31	up	BVDV, IBR and M. haemolytica	yes
	NLRX1	15:30278099-30296546	30-31	up	IBR	yes
	PVRL1	15:30743499-30811461	30-31	down	BRSV	no
	THY1	15:30509503-30515399	30-31	up	BVDV	yes
	OAF	15:31312051-31331174	31-32	up	BRSV, BVDV and IBR	no
	LOC100295210	16:36963326-36966885	36-37	down	M. haemolytica	no
	GLUL	16:64948312-64958885	64-65	up	BVDV	no
	CENPF	16:70439073-70501667	70-71	down	BRSV, BVDV and IBR	no
	ELF3	16:70826651-70830814	70-71	down	M. haemolytica	yes
	PTPN14	16:70619177-70749808	70-71	down	IBR	no
	SMYD2	16:70760232-70824127	70-71	up	BVDV	no
	EDNRA	17:10752465-10828318	10-11	up	M. haemolytica	yes
	SMARCA5	17:14546190-14583767	14-15	down	BVDV and IBR	no
	INPP4B	17:15685434-16116848	16-17	down	BRSV, BVDV, IBR, M. haemolytica, P.multocida and M. bovis	no
	DRG1	17:72273493-72288389	72-73	up	BRSV	no
	LOC100295022	17:72901504-72908949	72-73	up	BRSV and BVDV	no
	LOC100297594	17:72929309-72937953	72-73	up	BRSV, BVDV, IBR and P. multocida	no
	LOC100336430	17:72808681-72810253	72-73	down	BVDV	no
	LOC511353	17:72815146-72817914	72-73	up	BRSV, BVDV, IBR, M. haemolytica, P.multocida and M. bovis	no
	PIK3IP1	17:72198071-72208758	72-73	up	BVDV	no
	SELM	17:72064475-72068000	72-73	up	BRSV, BVDV, IBR, M. haemolytica and P. multocida	yes
	SMTN	17:72028545-72064314	72-73	up	BVDV, IBR, M. haemolytica and P. multocida	no
	BAX	18:55985201-55989210	55-56	up	BRSV, BVDV and IBR	yes
	CA11	18:55730116-55736497	55-56	up	BVDV	no
	DBP	18:55722334-55729578	55-56	inconsistent	BVDV and M. haemolytica	no
	DHDH	18:55964767-55975733	55-56	up	BVDV and P. multocida	no
	EHD2	18:55071167-55087455	55-56	up	BVDV, IBR, M. haemolytica and P. multocida	no
	EMP3	18:55482511-55486850	55-56	up	BRSV, BVDV, IBR and M. haemolytica	no
	FTL	18:55992909-55994744	55-56	up	BRSV, BVDV, IBR and P. multocida	no
	GLTSCR2	18:55089142-55097796	55-56	up	BVDV	no
	GRWD1	18:55573213-55579279	55-56	up	BRSV and IBR	no
	HSD17B14	18:55878588-55899000	55-56	up	BVDV, M. haemolytica and P. multocida	no
	KDELR1	18:55523302-55534438	55-56	up	BRSV, BVDV, IBR, M. haemolytica and P.multocida	no
	LOC510613	18:55366538-55371100	55-56	down	BRSV	no
	NUCB1	18:55939162-55955612	55-56	up	BRSV and IBR	no
	PLEKHA4	18:55899134-55922868	55-56	up	BRSV, BVDV and IBR	no
	PPP1R15A	18:55925890-55929296	55-56	up	BSRV and IBR	yes
	RASIP1	18:55810632-55824241	55-56	up	BVDV, M.haemolytica and P. multocida	no
	CHMP2A	18:65960798-65963496	65-66	up	BRSV and IBR	no
	LOC100124497	18:65132594-65136130	65-66	down	BVDV and IBR	no
	LOC789374	18:65316063-65322151	65-66	down	BRSV, BVDV and IBR	no
	LOC790009	18:65165406-65172374	65-66	down	BRSV, BVDV and IBR	no
	TCEB2	25:2281944-2285932	65-66	up	BRSV	no
	UBE2M	18:65964091-65967276	65-66	up	BRSV and IBR	no
	ZIK1	18:65288703-65295832	65-66	down	IBR	no
	ZNF135	18:65676641-65689198	65-66	down	BRSV	no
	ZNF606	18:65643350-65667392	65-66	down	BRSV and IBR	no
	A1BG	18:65826615-65830778	65-66	up	BVDV	no
	MPO	19:9473000-9484176	9-10	up	BVDV, IBR, M. haemolytica and P. multocida	yes
	RAD51C	19:9888960-9919367	9-10	down	BVDV	no
	RNF43	19:9548267-9612348	9-10	down	BRSV	no
	SUPT4H1	19:9539467-9546196	9-10	up	BRSV and IBR	no
	C1QBP	19:26724672-26730101	26-27	up	BRSV, IBR and M. haemolytica	yes
	DERL2	19:26683194-26691721	26-27	up	BRSV and IBR	no
	DHX33	19:26702291-26715381	26-27	down	BVDV and IBR	no
	LOC788205	19:26675244-26676864	26-27	down	BRSV and M. haemolytica	no
	WSCD1	19:26253579-26296311	26-27	down	IBR	no
	PANK3	20:182971-204785	0-1	down	BVDV, IBR and P. multocida	no
	SLIT3	20:324336-1051861	0-1	up	BVDV, M. haemolytica and P. multocida	no
	ANKRD55	20:23007390-23117580	23-24	up	BVDV	no
	GPX8	20:23975636-23980445	23-24	up	BRSV, BVDV, IBR and M. haemolytica	no
	IL6ST	20:23126025-23274582	23-24	down	BRSV and IBR	yes
	PAX9	21:47292473-47306417	47-48	down	BRSV, BVDV, IBR and M. haemolytica	no
	BEND6	23:3106006-3149294	3-4	down	BRSV, IBR and M. haemolytica	no
	COL21A1	23:3946456-4181456	3-4	up	BVDV, M. haemolytica, M. bovis and P. multocida	no
	DST	23:3281537-3688415	3-4	down	BRSV, BVDV, IBR, M. haemolytica and M. bovis	yes
	ZNF451	23:2971190-3058878	3-4	down	BVDV and IBR	no
	ARHGAP17	25:22843015-22936983	22-23	down	M. haemolytica	no
	PRKCB	25:21759691-22131513	22-23	down	BRSV, BVDV and IBR	yes
	RBBP6	25:22459344-22493835	22-23	down	BVDV and IBR	no
	TNRC6A	25:22674099-22746792	22-23	down	BRSV, BVDV and IBR	no
	TSPAN14	28:36051346-36109016	36-37	down	M. haemolytica	no
	CTTN	29:48167167-48194210	48-49	up	BVDV and P. multocida	no
	FADD	29:48027925-48030331	48-49	up	BRSV, BVDV and IBR	yes
